# Supplementary material for: Characterization of the gut bacterial and viral microbiota in latent autoimmune diabetes in adults
Source: PubMed Central journal article supplement (PMC11003976; doi:10.1038/s41598-024-58985-w), 2024-04-09
Supplement: 41598_2024_58985_MOESM1_ESM.pdf [file 41598_2024_58985_MOESM1_ESM.pdf]

# Characterization of the gut bacterial and viral microbiota in latent autoimmune diabetes in adults

Casper S. Poulsen<sup>1</sup>, Dan Hesse<sup>2,3</sup>, Gabriel R. Fernandes<sup>4</sup>, Tue H. Hansen<sup>1</sup>, Timo Kern<sup>1,5</sup>, Allan Linneberg<sup>6,7</sup>, Lore Van Espen<sup>8</sup>, Torben Jørgensen<sup>9,10</sup>, Trine Nielsen<sup>1</sup>, Amra C. Alibegovic<sup>2,3</sup>, Jelle Matthijssens<sup>8</sup>, Oluf Pedersen<sup>1,11</sup>, Henrik Vestergaard<sup>1,2,12</sup>, Torben Hansen<sup>1\*</sup>, and Mette K. Andersen<sup>1\*</sup>

## Affiliation

<sup>1</sup> The Novo Nordisk Foundation Center for Basic Metabolic Research, Faculty of Health and Medical Sciences, University of Copenhagen, Copenhagen, Denmark

<sup>2</sup> Steno Diabetes Center Copenhagen, Gentofte, Denmark

<sup>3</sup> Novo Nordisk A/S, Soeborg, Denmark

<sup>4</sup> Biosystems Informatics, Institute René Rachou – Fiocruz Minas, Belo Horizonte, Brazil

<sup>5</sup> Clinical Microbiomics A/S, Copenhagen, Denmark

<sup>6</sup> Center for Clinical Research and Prevention, Bispebjerg and Frederiksberg Hospital, The Capital Region, Copenhagen, Denmark

<sup>7</sup> Department of Clinical Medicine, Faculty of Health and Medical Sciences, University of Copenhagen, Copenhagen, Denmark

<sup>8</sup> KU Leuven, Department of Microbiology, Immunology & Transplantation, Rega Institute, Laboratory of Clinical & Epidemiological Virology, Leuven, Belgium

<sup>9</sup> Center for Clinical Research and Prevention, Bispebjerg and Frederiksberg Hospital, The Capital Region, Copenhagen, Denmark

<sup>10</sup> Department of Public Health, Faculty of Health and Medical Sciences, University of Copenhagen, Copenhagen, Denmark

<sup>11</sup> Center for Clinical Metabolic Research, Department of Medicine, Gentofte University Hospital, Copenhagen, Denmark

<sup>12</sup> Department of Medicine, Bornholms Hospital, Rønne, Denmark

## Correspondence

Torben Hansen & Mette K. Andersen

[torben.hansen@sund.ku.dk](mailto:torben.hansen@sund.ku.dk) & [metteandersen@sund.ku.dk](mailto:metteandersen@sund.ku.dk)

**Supplementary figure 1: Exploration of differences between diagnostic groups investigating alpha and beta-diversity parameters (a), and by PCoA (b), after removal of individuals treated with metformin.** Alpha-diversity was visualized with violin plots and included richness, Pielou's evenness, and Shannon diversity. A non-parametric overall comparison of diagnostic groups was performed using the Kruskal-Wallis test. If significant, a follow-up pairwise comparison of groups was performed with the Mann-Whitney test and p-values were Bonferroni corrected. Bray-Curtis dissimilarity calculated from Hellinger transformed total sum scaled data was used as beta-diversity measure and the violin plot represented the within group variation. PERMANOVA was used to compare all diagnostic groups and follow-up pairwise comparison of diagnostic groups were p-values were Bonferroni corrected. PCoA were used to visualize dissimilarities of all samples. Variance explained by the first two axes were included in their labels. Violin plots of beta-diversity represented within diagnostic group dissimilarity.

**a**

P value significance level 0.05&gt;\*≥0.01&gt;\*\*≥0.001&gt;\*\*\*

Kruskal  $p=8.3 \times 10^{-3}$ Kruskal  $p=0.064$ Kruskal  $p=0.025$ PERMANOVA  $p=1.0 \times 10^{-3}$ 

richness

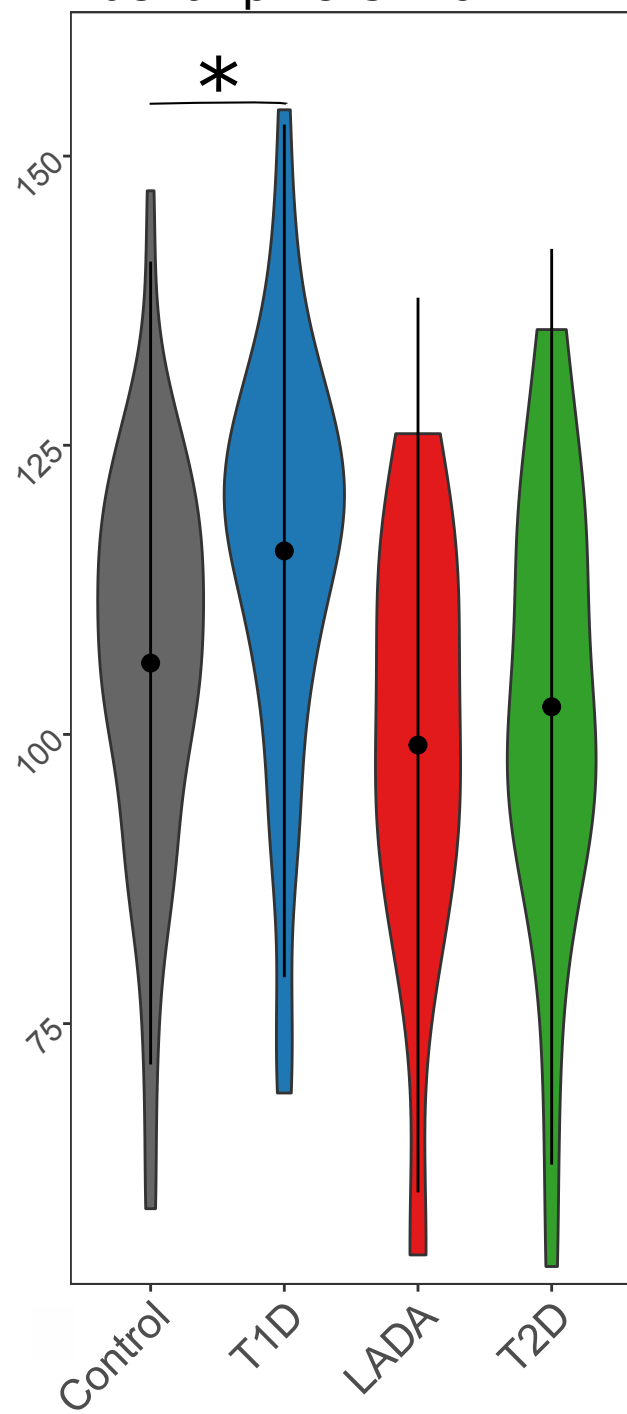

Pielou

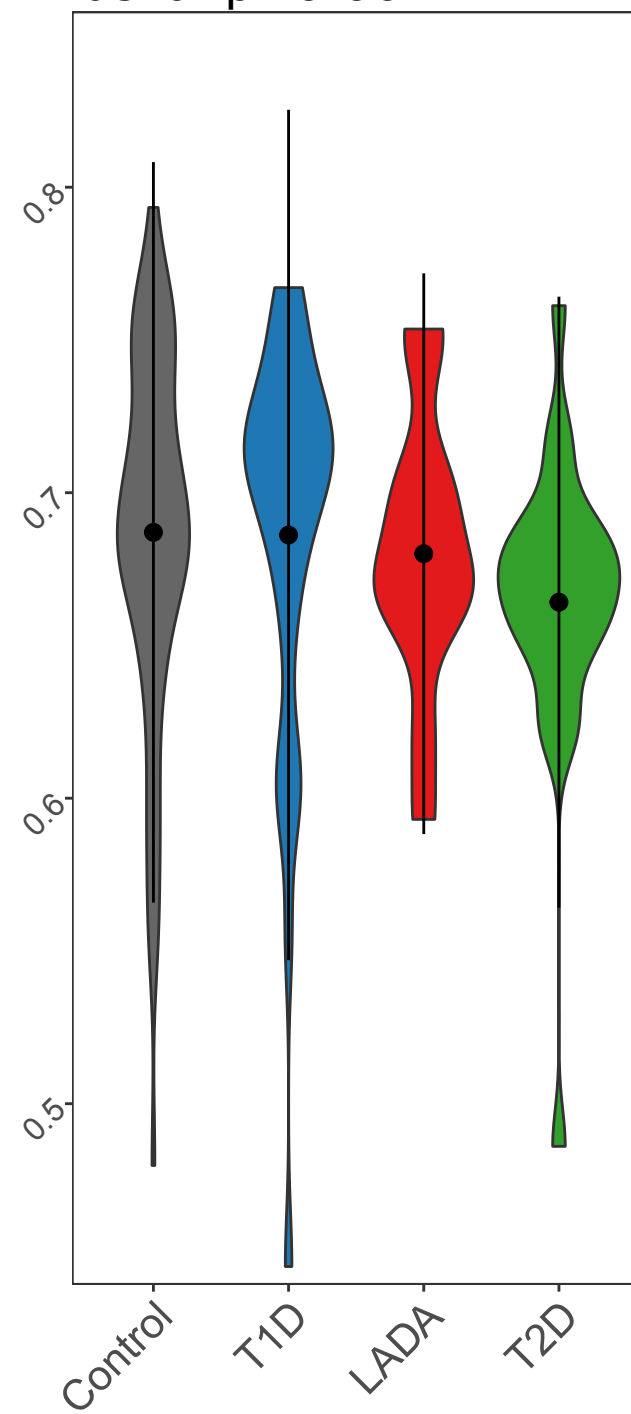

Shannon

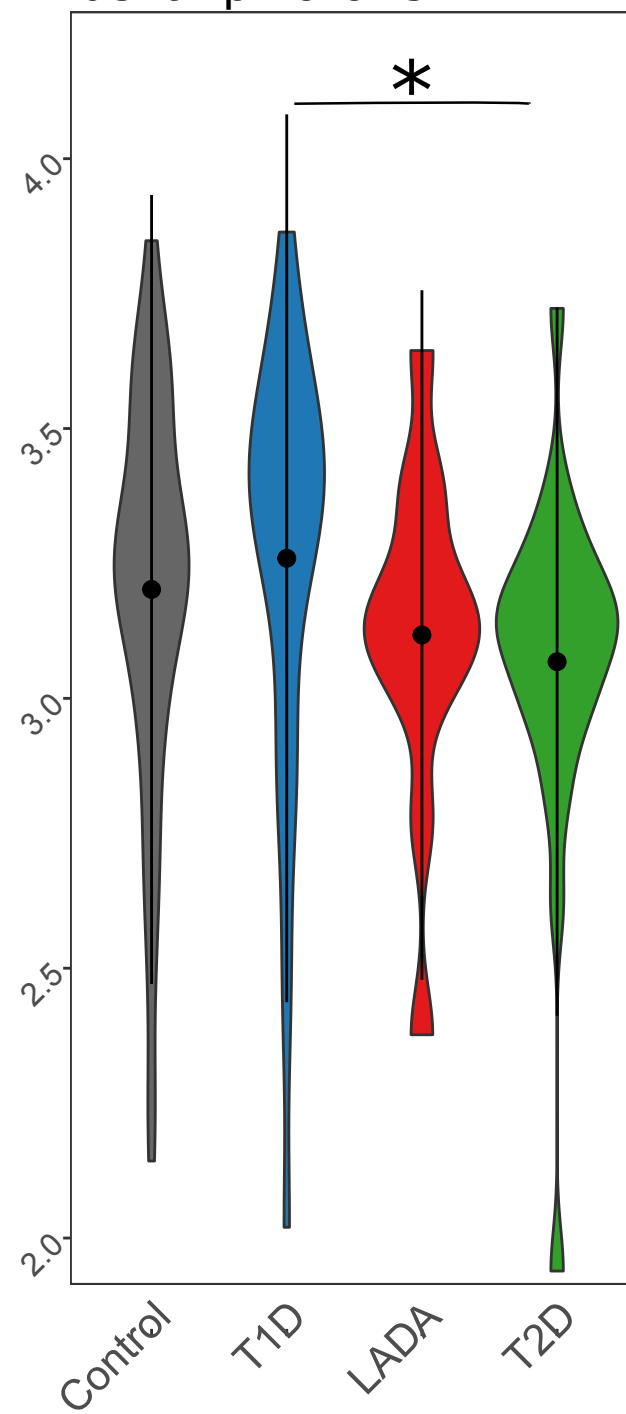

Dissimilarity

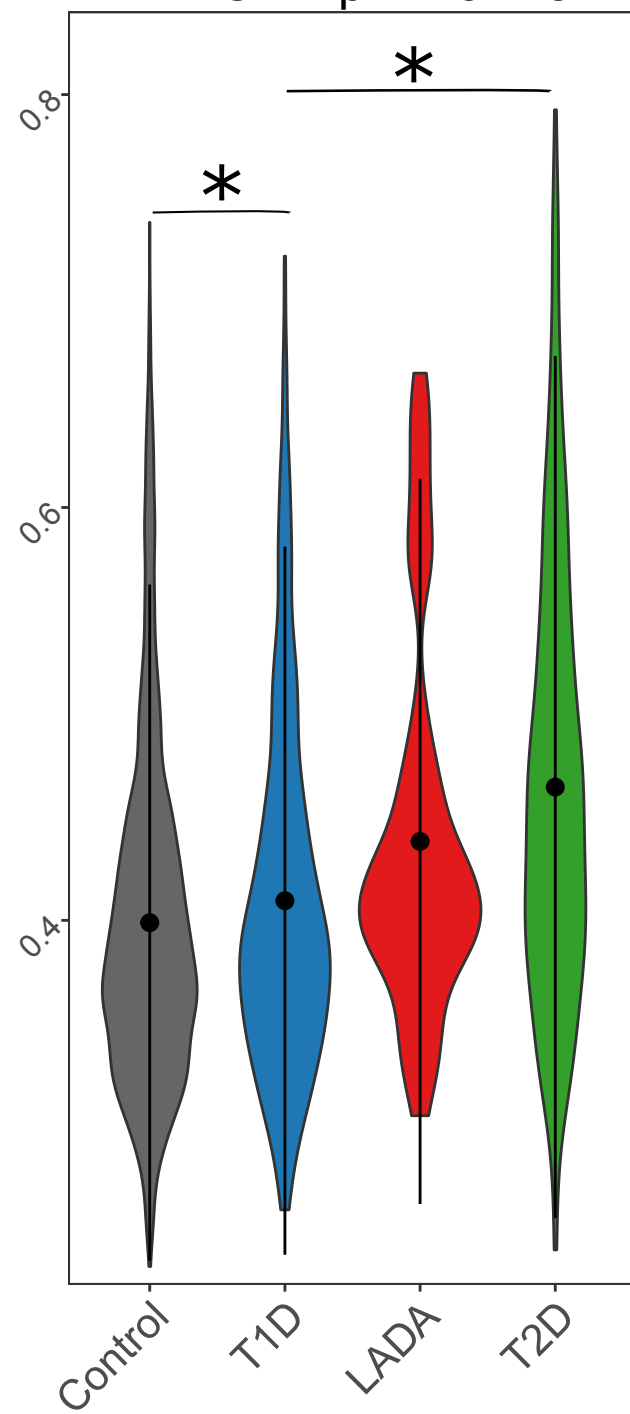**b**

PCoA2 7.93 % variance

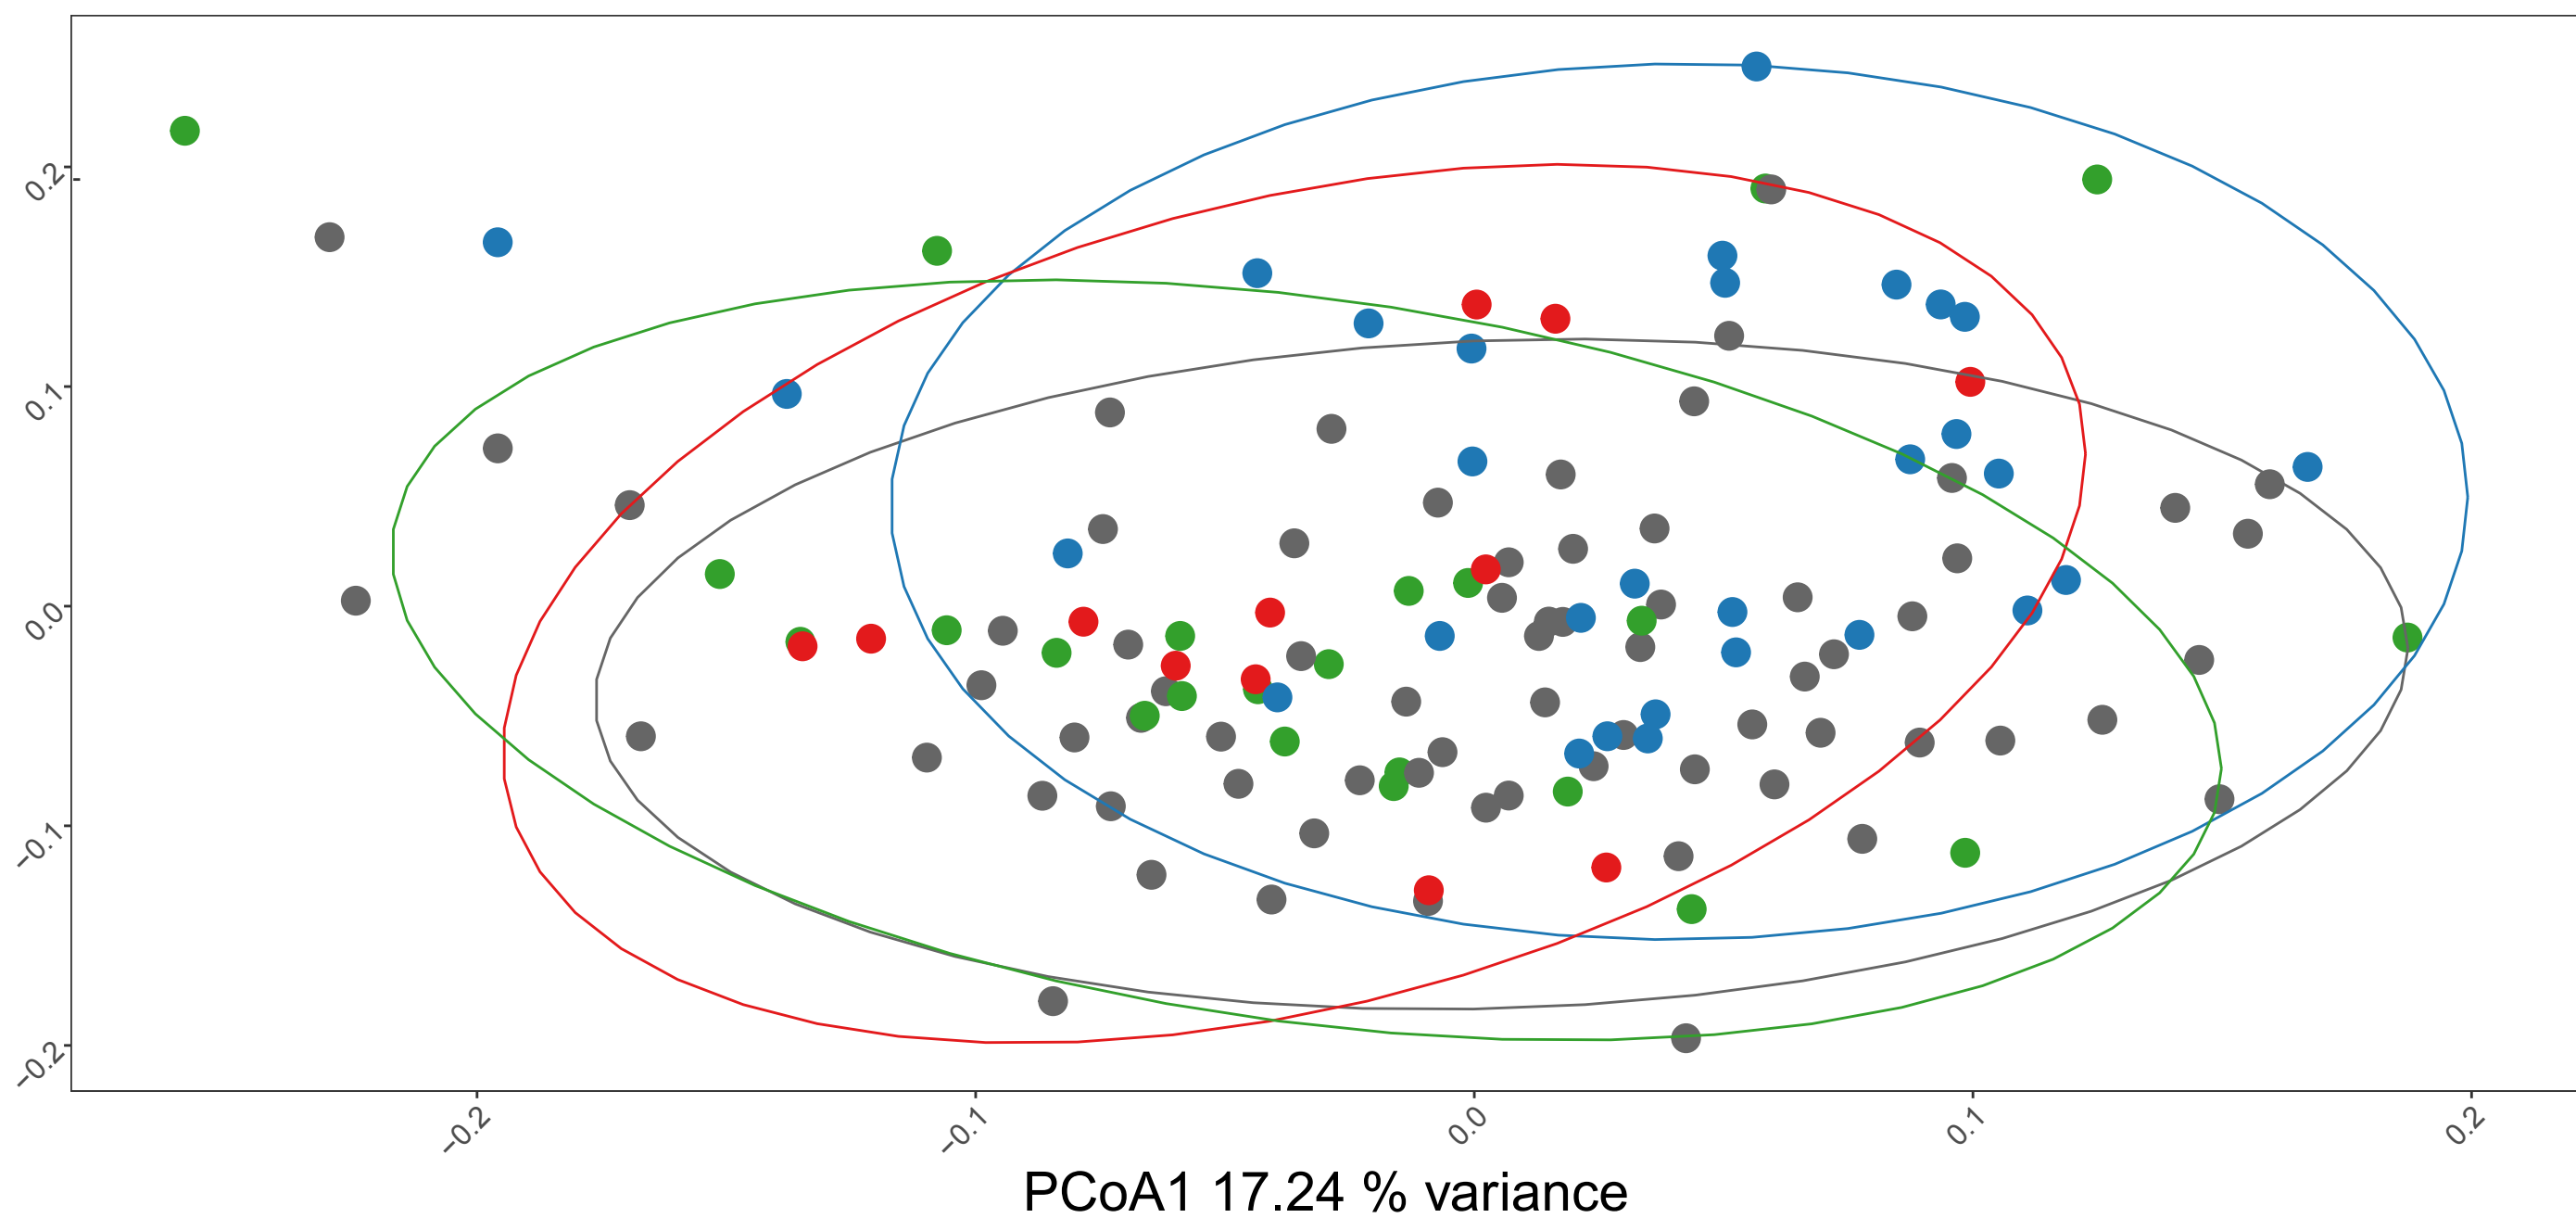

Diagnosis ● Control ● T1D ● T2D ● LADA

**Supplementary figure 2: Differences in specific genera observed between diagnostic groups, Volcano plot showing results from the differential abundance analysis (a), and boxplots of selected genera (b), after removal of individuals treated with metformin.** Differential abundance tests were performed with cell counts as normalization factors in DESeq2 performing both likelihood ratio test, comparing all diagnostic groups, and a Wald test to make pairwise comparisons between diagnostic groups. P-values in the Wald test are Benjamini-Hochberg corrected.



**a**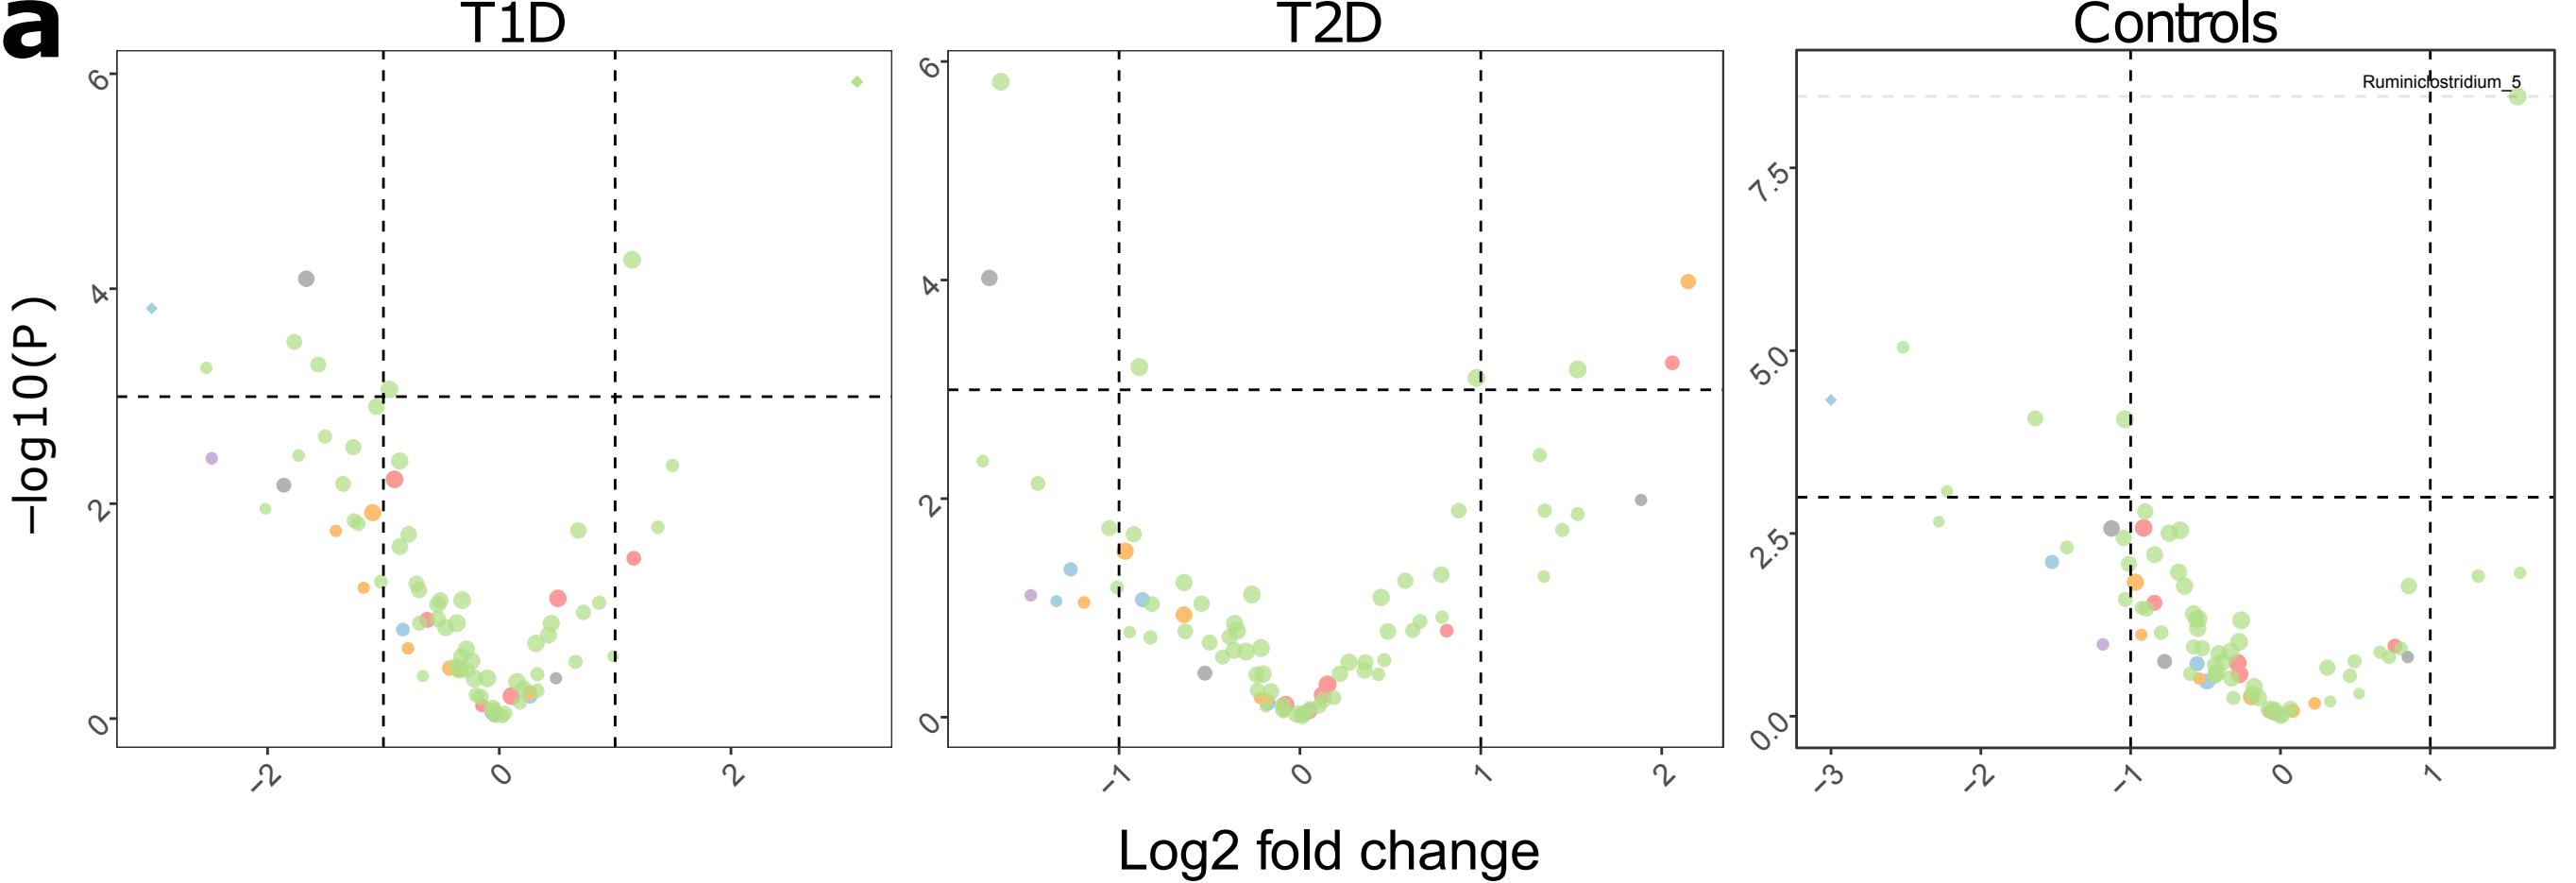**b**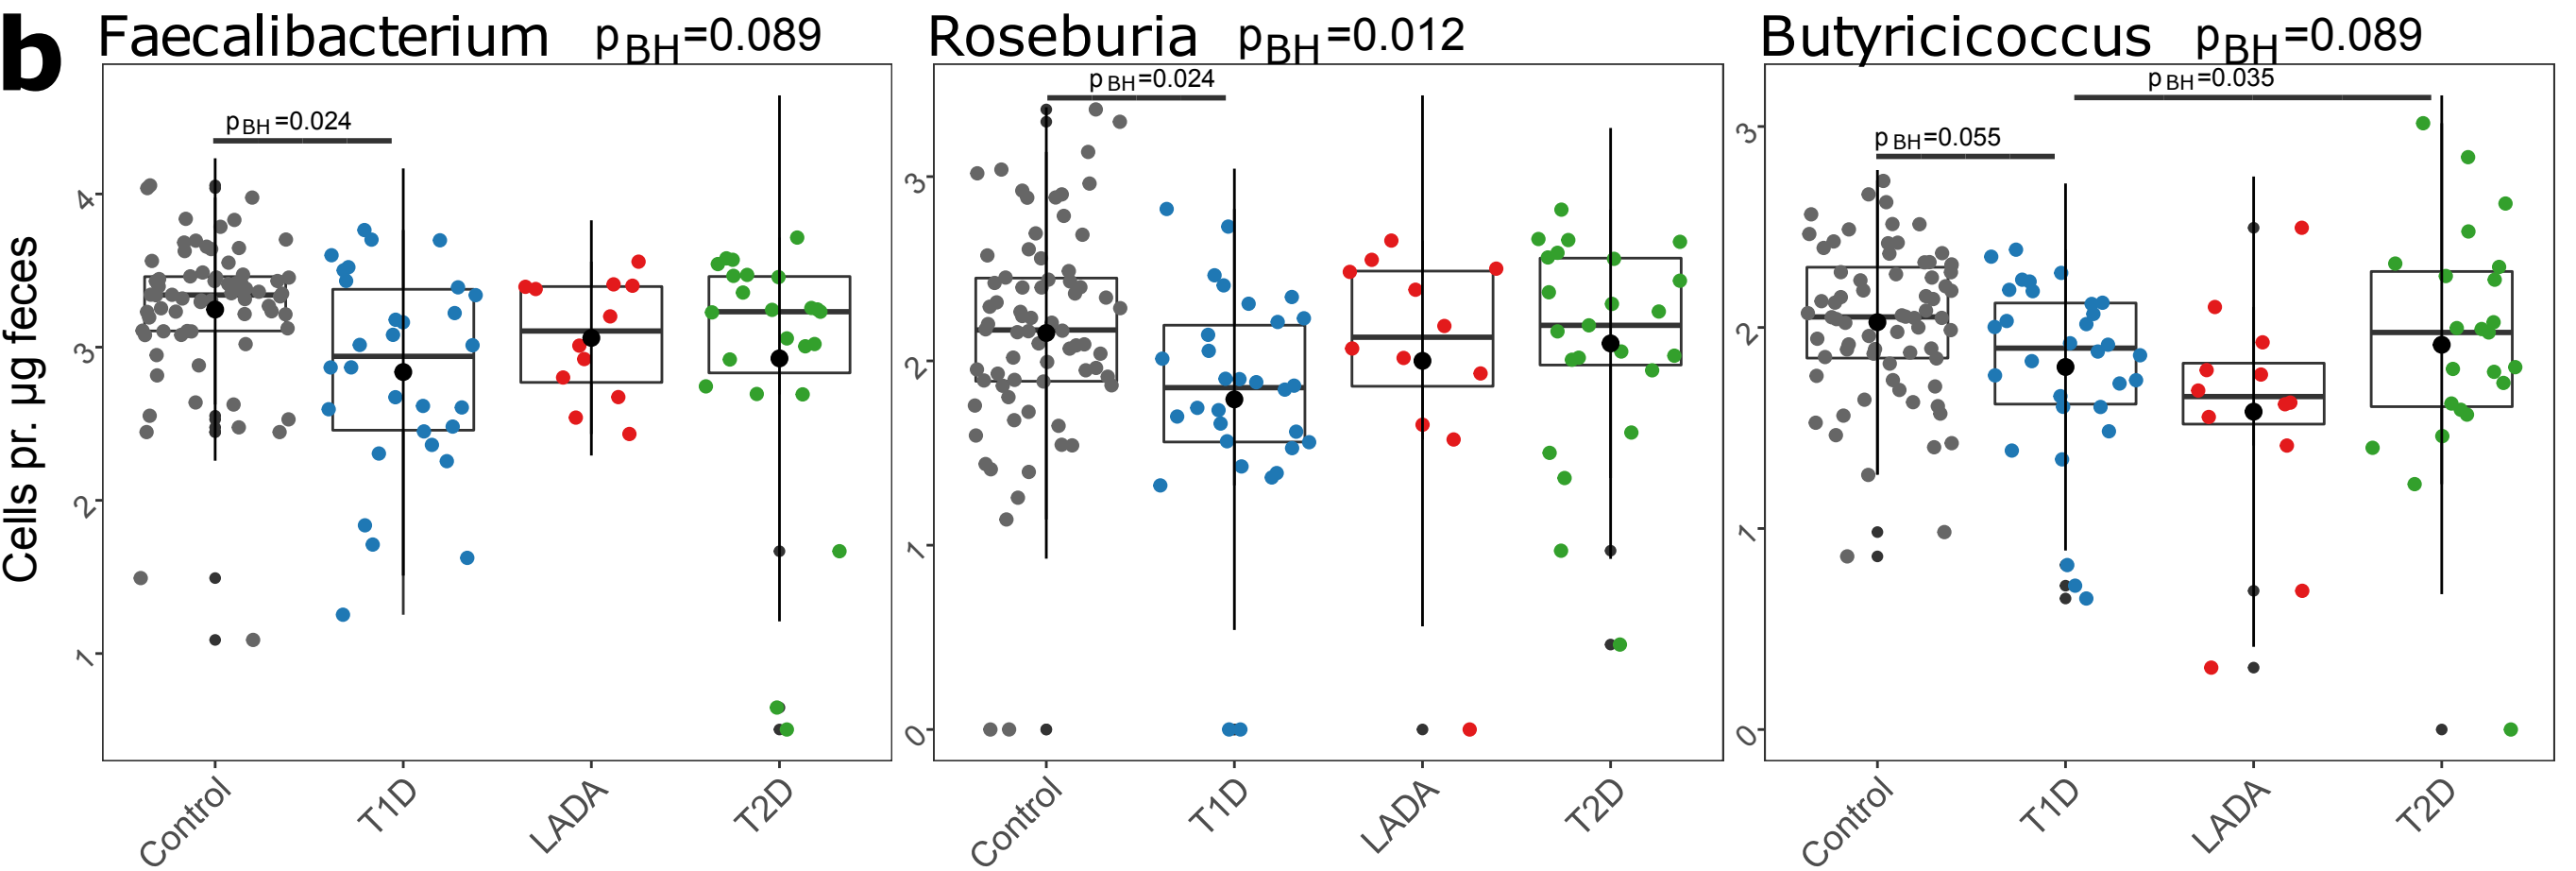

**Supplementary figure 3: Rank abundance curves of genera showing their abundance distribution in all samples and the different diagnostic groups (Controls, type 1 diabetes, type 2 diabetes and LADA).**

**All**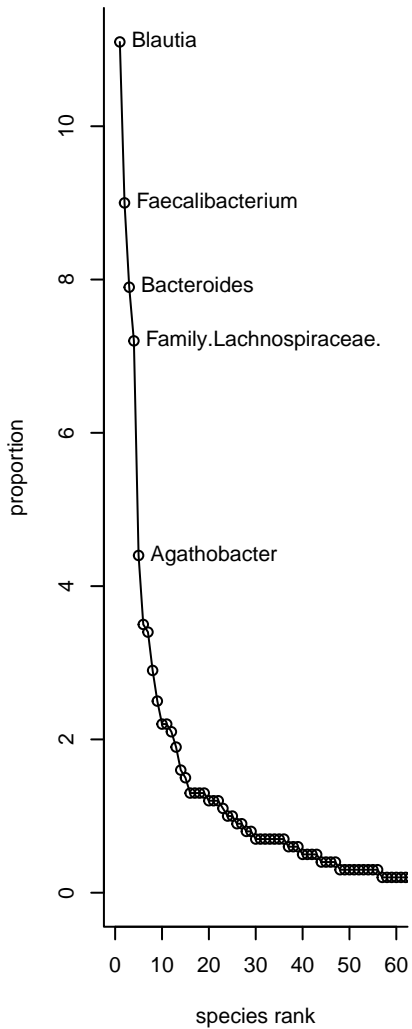**Control**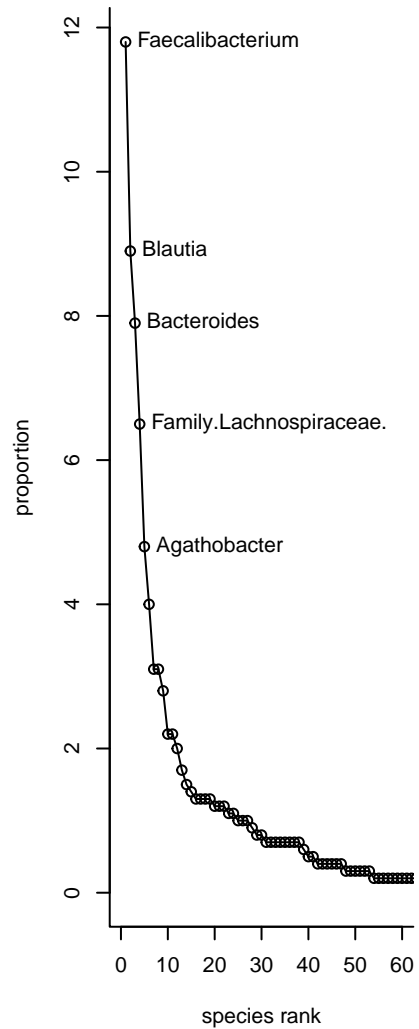**T1D**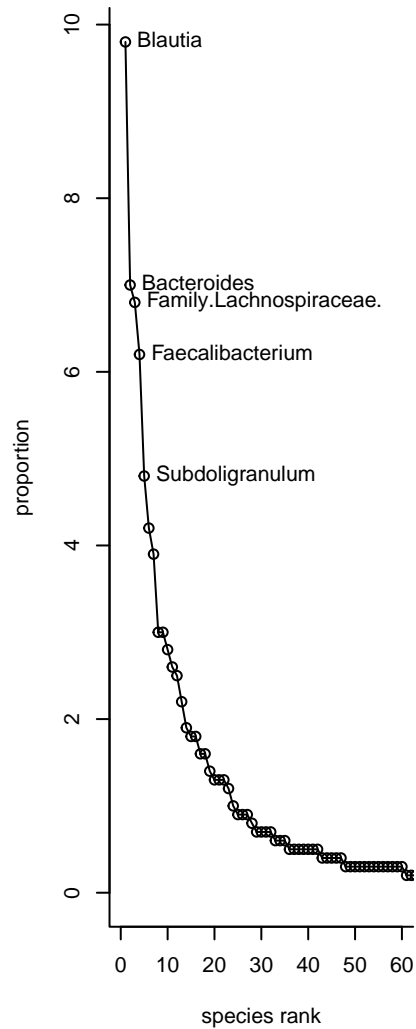**LADA**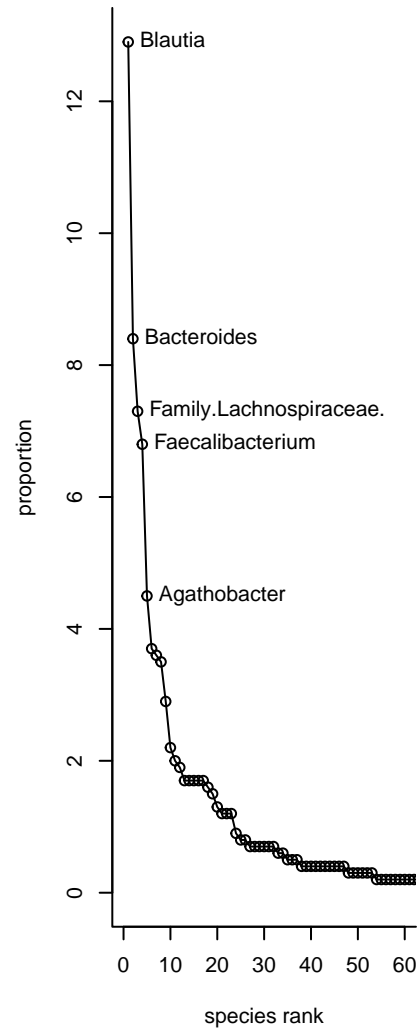**T2D**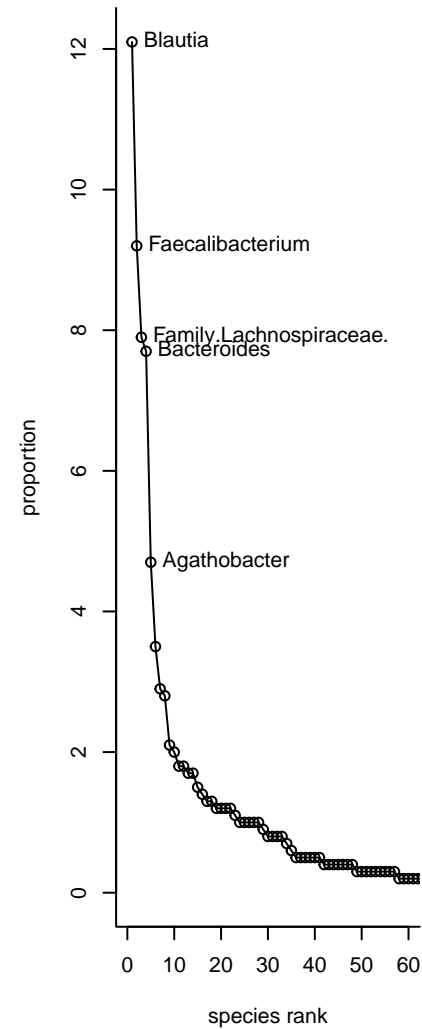

**Supplementary figure 4: Exploration of functional differences between diagnostic groups investigating alpha and beta-diversity parameters (a), and by PCoA (b).** Alpha-diversity was visualized with violin plots and included richness, Pielou's evenness, and Shannon diversity. A non-parametric overall comparison of diagnostic groups was performed using the Kruskal-Wallis test. If significant, a follow-up pairwise comparison of groups was performed with the Mann-Whitney test and p-values were Bonferroni corrected. Bray-Curtis dissimilarity calculated from Hellinger transformed total sum scaled data was used as beta-diversity measure and the violin plot represented the within group variation. PERMANOVA was used to compare all diagnostic groups and follow-up pairwise comparison of diagnostic groups were p-values were Bonferroni corrected. PCoA were used to visualize dissimilarities of all samples. Variance explained by the first two axes were included in their labels. Violin plots of beta-diversity represented within diagnostic group dissimilarity.

**a**P value significance level 0.05 > \*  $\geq 0.01$  > \*\*  $\geq 0.001$  > \*\*\*

Kruskal p=0.096

Kruskal p= $1.6 \times 10^{-3}$ 

Kruskal p=0.052

PERMANOVA p= $1.0 \times 10^{-3}$ 

richness

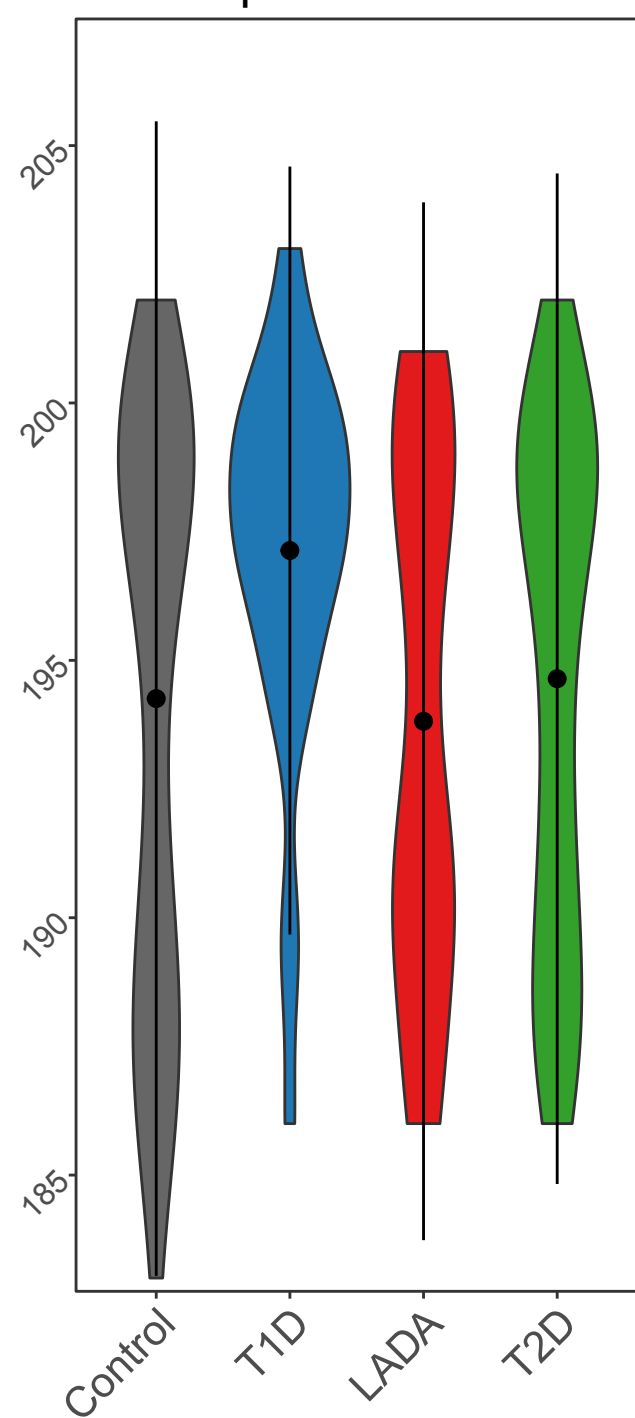

Pielou

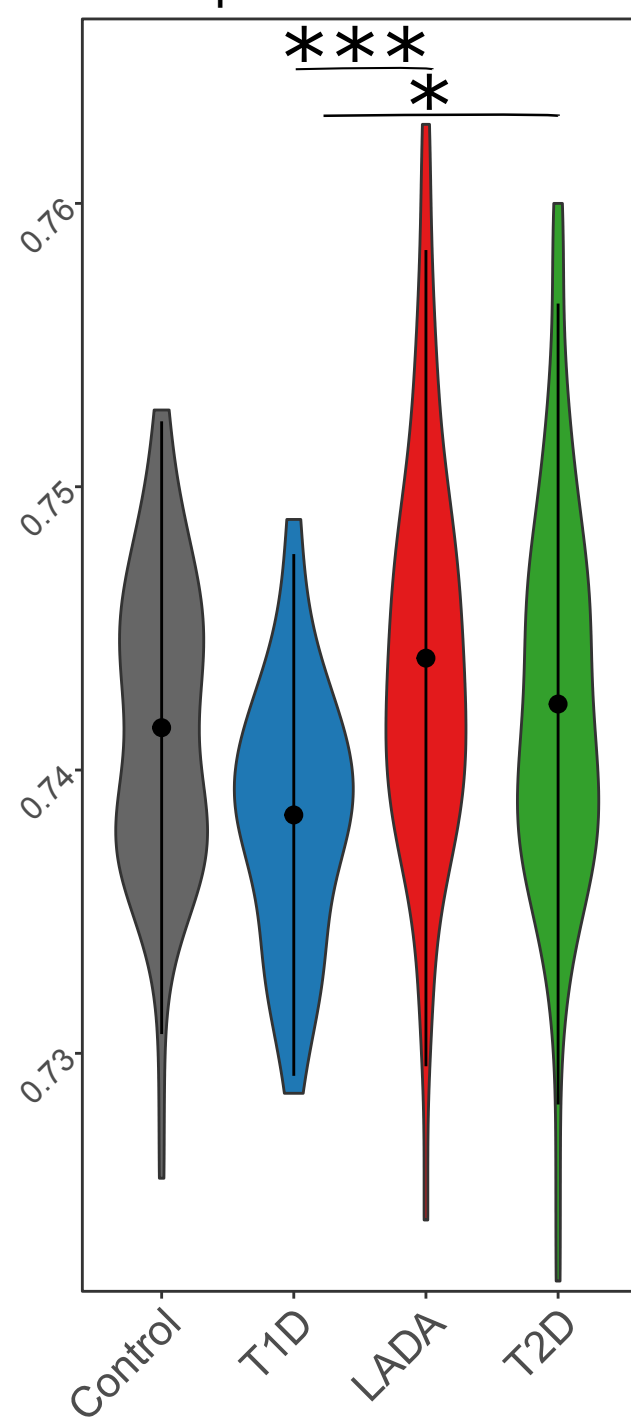

Shannon

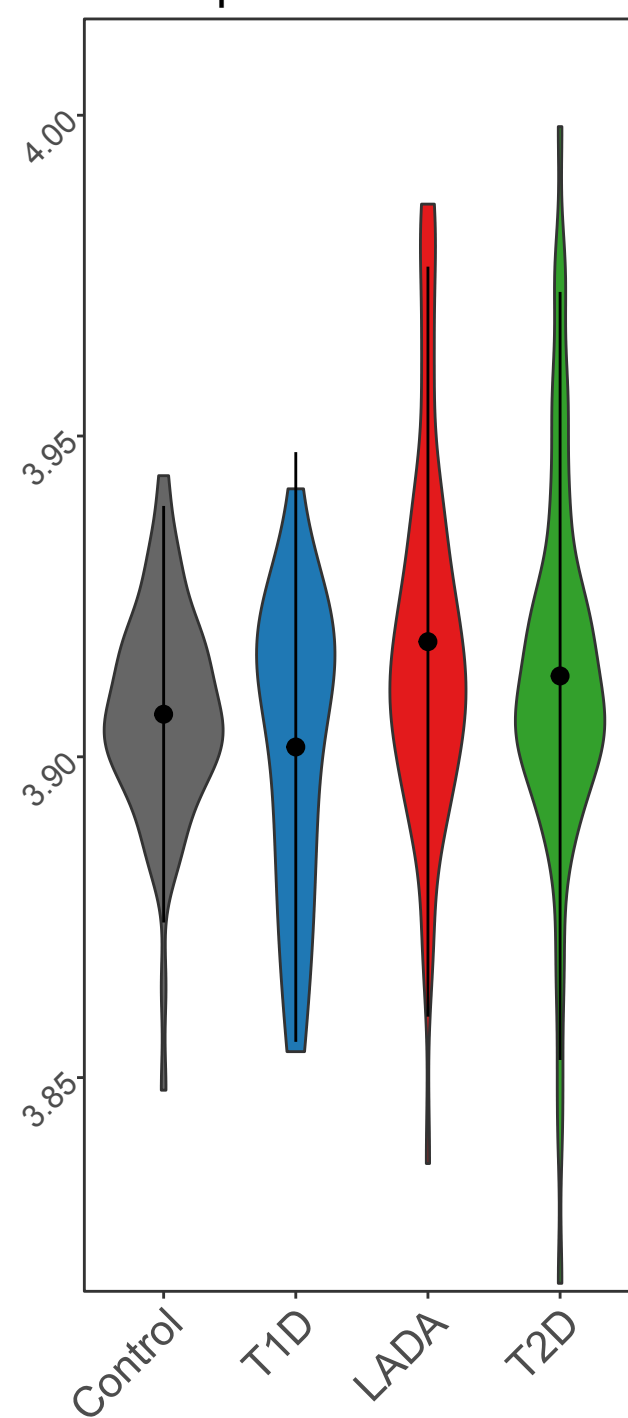

Dissimilarity

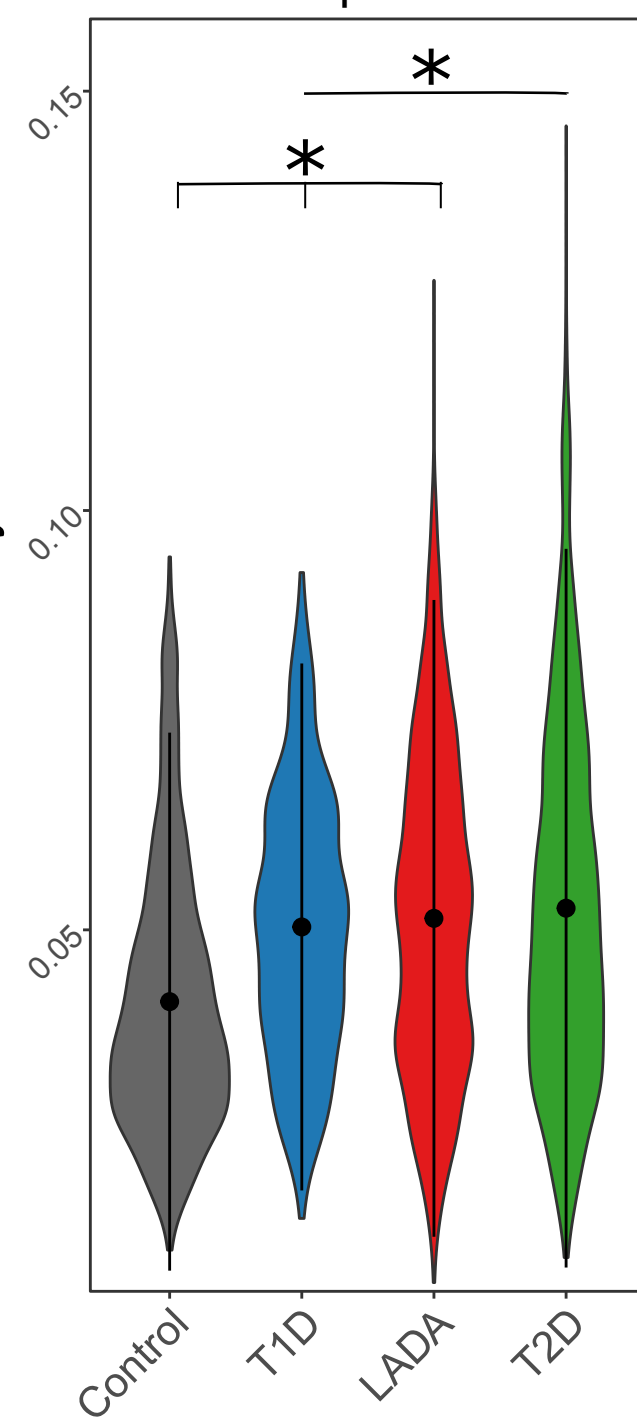**b**

PCoA2 18.25 % variance

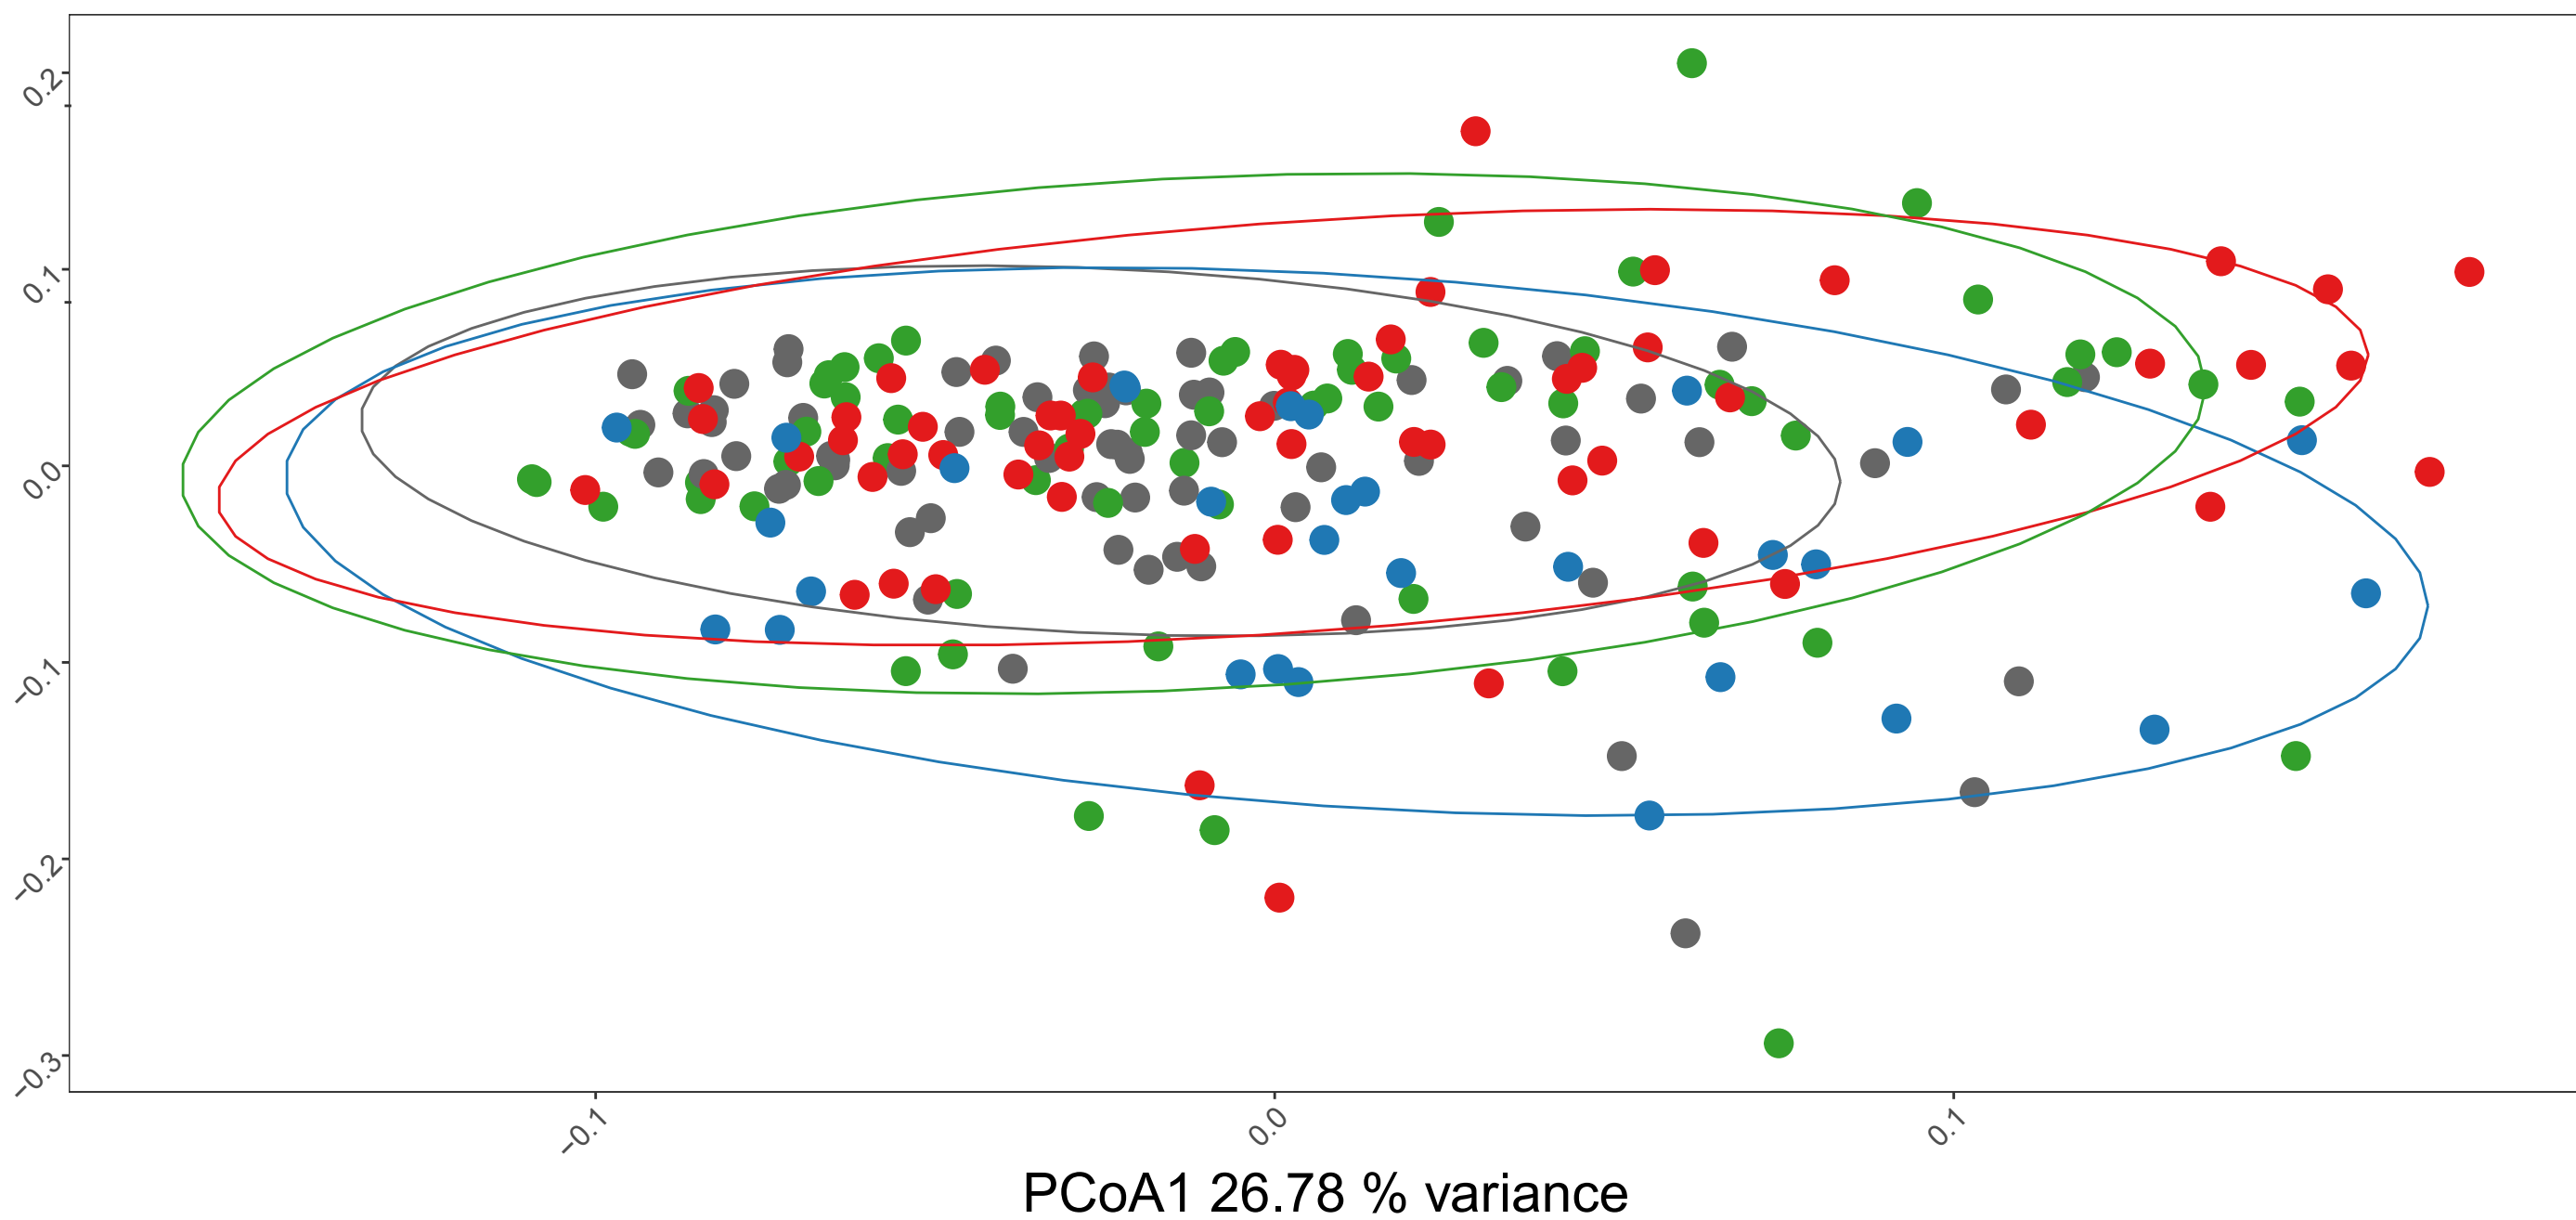

Diagnosis ● Control ● T1D ● T2D ● LADA

**Supplementary figure 5: Differences in functional orthologues observed between diagnostic groups, Volcano plot showing results from the differential abundance analysis (a), and boxplots of selected orthologues (b).** Differential abundance tests were performed with cell counts as normalization factors in DESeq2 performing both likelihood ratio test, comparing all diagnostic groups, and a Wald test to make pairwise comparisons between diagnostic groups. P-values in the Wald test are Benjamini-Hochberg corrected.

**a****T1D****T2D****Controls**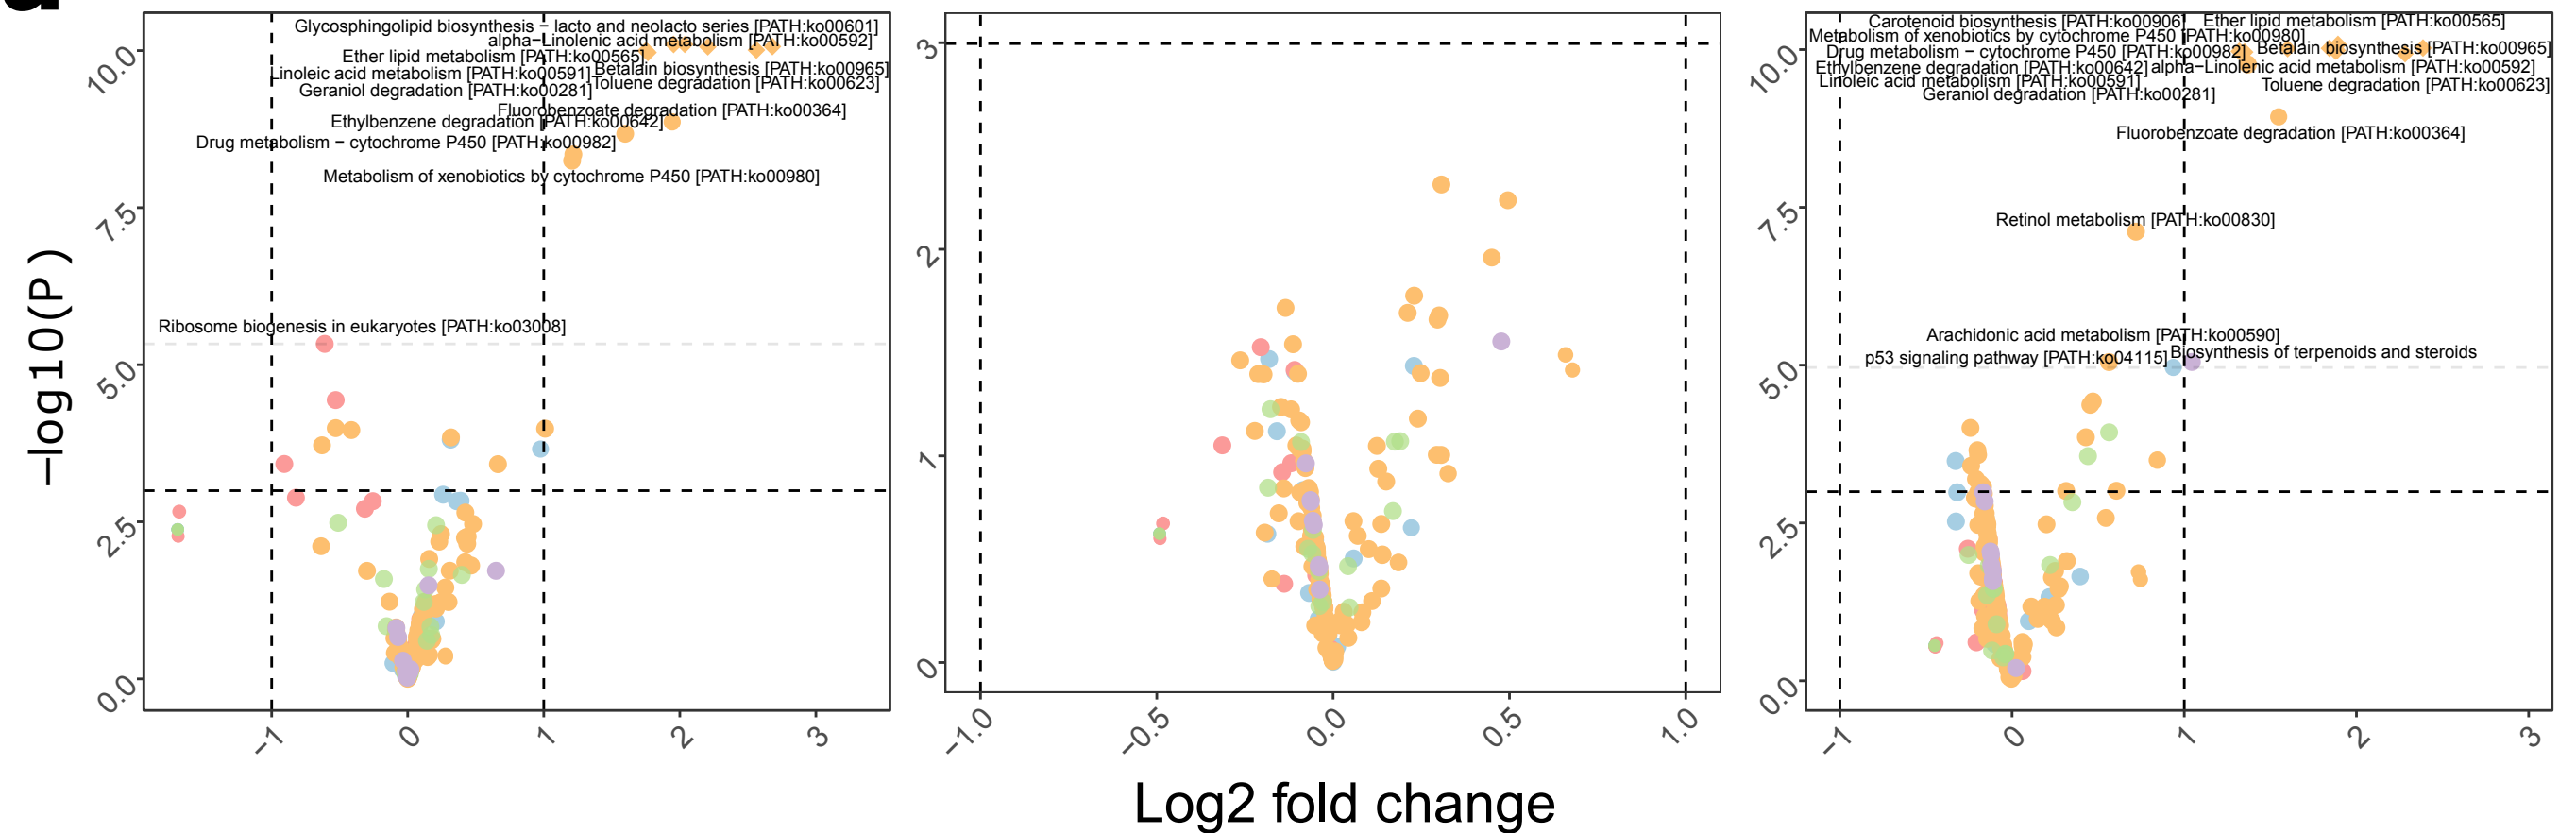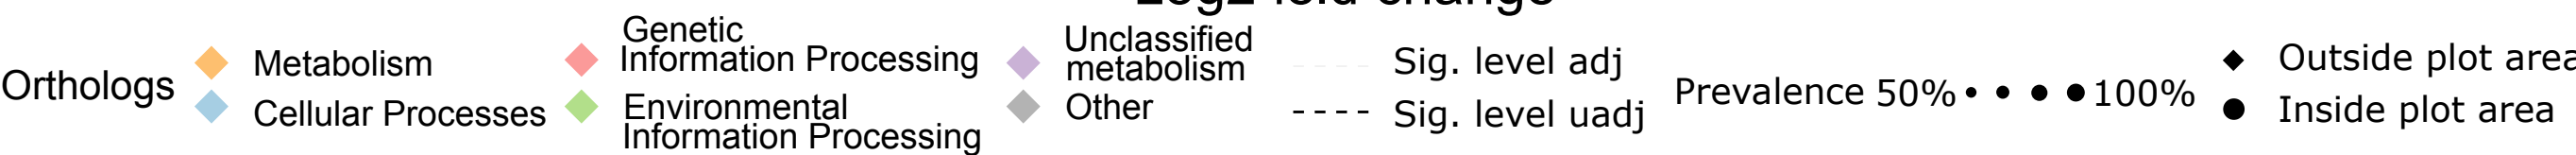**b**Geraniol degradation  $p_{BH} < 1.0 \times 10^{-6}$ Carotenoid biosynthesis  $p_{BH} = 0.011$ Retinol metabolism  $p_{BH} = 0.12$ 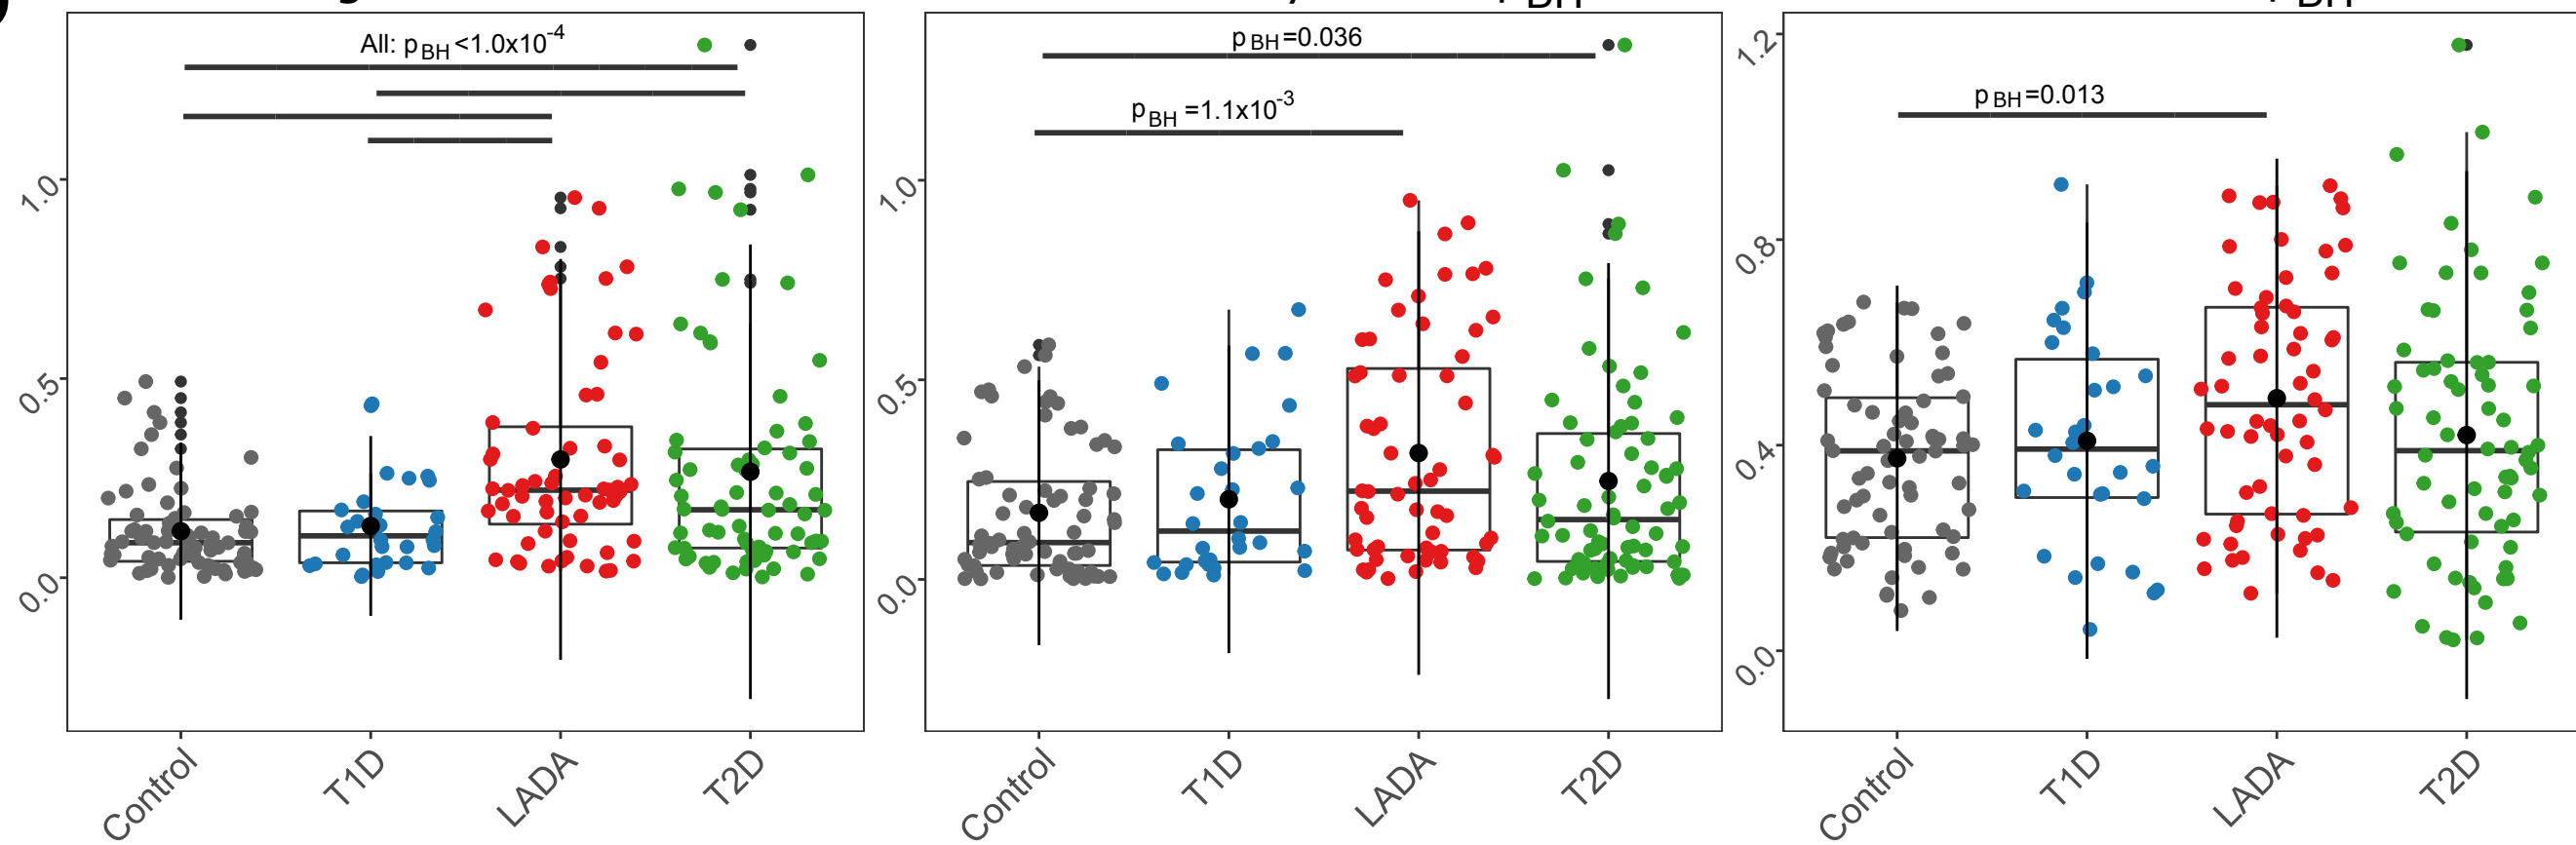

**Supplementary figure 6: Differences in the Podoviridae family across individuals with distinct diagnosis.** The boxplot pictures the difference, identified using DESeq2 Wald test, between T2D and Control individuals.



# Podoviridae

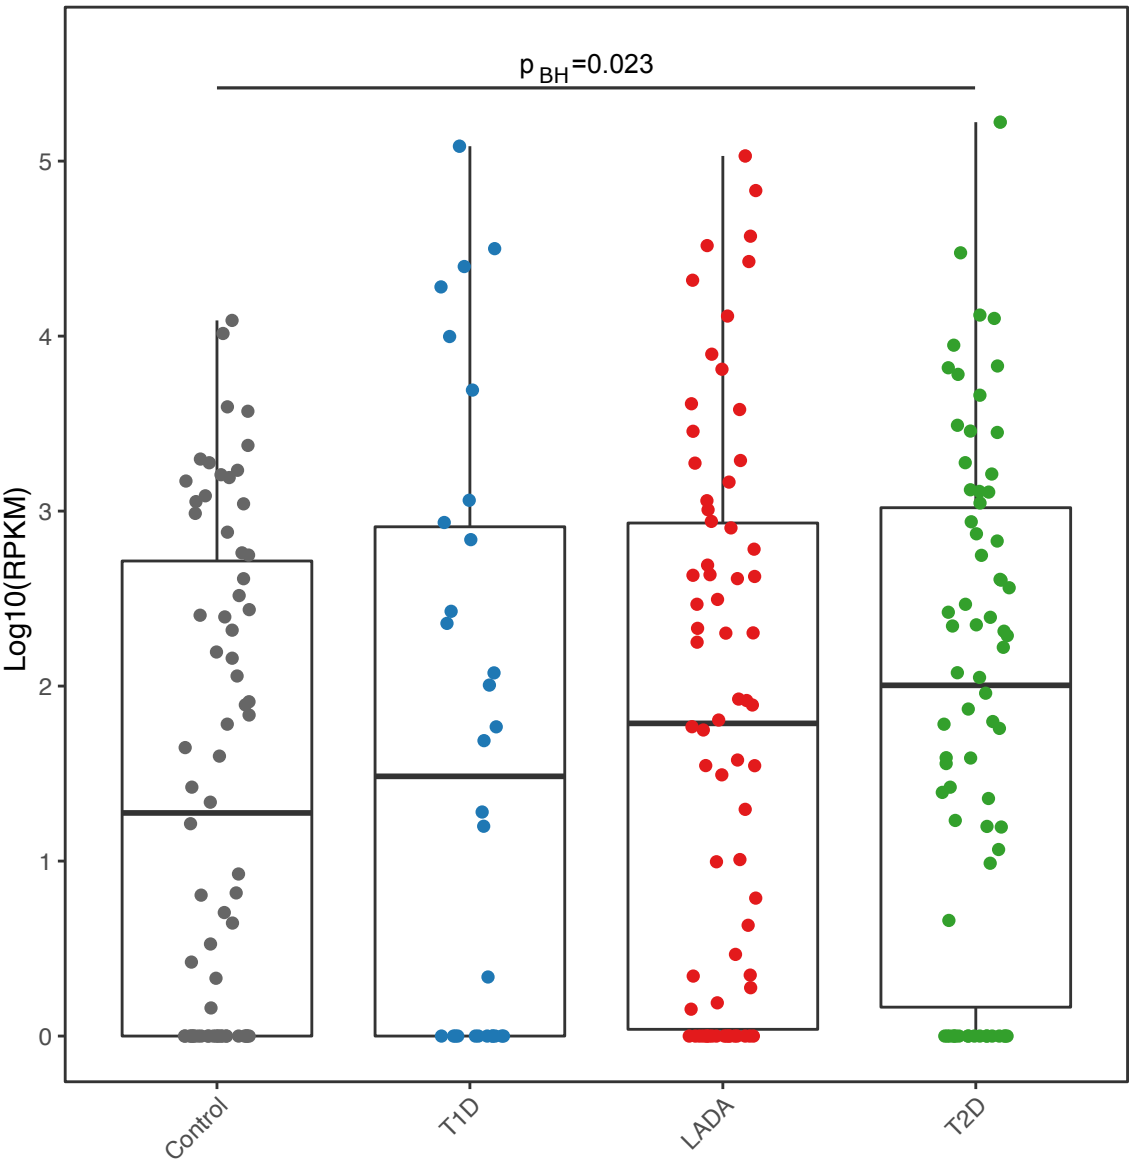

**Supplementary file 1: R analysis.** Supporting information include additional data summary, PCoA dimensions 1-3 also subsetted to diagnostic groups in pairs, heatmaps, CCA, venn diagrams comparing significant entities between the other groups and violin plots of all genera that had a significant result obtained from the DESeq (Wald) test.

# Microbiome analysis LADA study

Casper Sahl Poulsen

februar 24, 2022

## Contents

|                                                                           |     |
|---------------------------------------------------------------------------|-----|
| Introduction . . . . .                                                    | 2   |
| Samples . . . . .                                                         | 2   |
| Metadata . . . . .                                                        | 2   |
| Packages . . . . .                                                        | 2   |
| Overview . . . . .                                                        | 3   |
| Used colors throughout script . . . . .                                   | 7   |
| Analysis . . . . .                                                        | 9   |
| Summary metadata, quality of data and ecology . . . . .                   | 9   |
| Summary metadata, quality of data and ecology Metformin removed . . . . . | 22  |
| Alpha diversity . . . . .                                                 | 36  |
| Alpha diversity remove metformin . . . . .                                | 40  |
| Violin plots Dissimilarities . . . . .                                    | 43  |
| Violin plots Dissimilarities remove metformin . . . . .                   | 51  |
| PCoA . . . . .                                                            | 59  |
| PCoA remove metformin . . . . .                                           | 75  |
| Create figure 1 . . . . .                                                 | 92  |
| PERMANOVA . . . . .                                                       | 93  |
| PERMANOVA remove metformin . . . . .                                      | 99  |
| PERMANOVA MED subset . . . . .                                            | 102 |
| Pairwise PERMANOVA . . . . .                                              | 106 |
| Pairwise PERMANOVA remove metformin . . . . .                             | 109 |
| Heatmap . . . . .                                                         | 110 |
| CCA . . . . .                                                             | 112 |
| DESeq2 LRT . . . . .                                                      | 120 |
| DESeq2 LRT remove metformin . . . . .                                     | 129 |
| DESeq Wald . . . . .                                                      | 138 |

|                                           |     |
|-------------------------------------------|-----|
| DESeq Wald Remove metformin . . . . .     | 181 |
| Create figure 2 . . . . .                 | 217 |
| DESeq heatmap . . . . .                   | 218 |
| Additional . . . . .                      | 246 |
| Session information . . . . .             | 246 |
| This document was processed on: . . . . . | 247 |

## Introduction

Analysis of microbiome data (16S rRNA gene amplicon profiling) from the latent autoimmune diabetes in adults (LADA) study.

## Samples

70 LADA  
 30 T1D  
 70 T2D  
 70 Non-diabetic controls

## Metadata

Metadata: is the original metadata provided

MetadataEkstra: is subsequent provided metadata used only in the summary chunks. Have it as separate object, because square bracket selectors are used throughout the script.

MetadataMed: Selected covariates included not part of MetadataEkstra. Extracted from different metadata files from the original cohorts (see also “StenoClean\_LADA\_Medications\_CSP\_220105.Rmd”).

## Packages

```
#install.packages(c("dplyr", "knitr", "ggplot2", "vegan", "gridExtra", "zCompositions",
#                   "compositions", "reshape2", "tidyr", "digest", "mime",
#                   "exactRankTests", "nlme", "plotly", "BiodiversityR", "pheatmap",
#                   "RColorBrewer", "htmlTable", "curl", "stringr", "seqinr", "cowplot",
#                   "VennDiagram", "hablar", "ggnewscale"))
library(tibble)
library(dplyr)
library(knitr)
library(ggplot2)
library(vegan)
library(gridExtra)
library(zCompositions)
library(compositions)
library(reshape2)
library(tidyr)
library(digest)
library(mime)
library(exactRankTests)
```

```

library(nlme)
library(plotly)
library(htmlTable)
library(curl)
library(BiodiversityR)
library(pheatmap)
library(RColorBrewer)
library(stringr)
library(sequinr)
library(cowplot)
library(VennDiagram)
library(hablar)
library(ggnewscale)

#Bioconductor packages
#if (!requireNamespace("BiocManager", quietly = TRUE))
#  install.packages("BiocManager")
#BiocManager::install("mixOmics")
library("mixOmics")

#BiocManager::install("BiocParallel")
library("BiocParallel")

#BiocManager::install("ALDEx2")
library("ALDEx2")

#BiocManager::install("SIAMCAT")
library("SIAMCAT")

#BiocManager::install("DESeq2")
library("DESeq2")

# old way devtools::install_bitbucket("biobakery/maaslin2@default", ref="tip")
#BiocManager::install("Maaslin2")
library("Maaslin2")

```

## Overview

Have to run “Reading in data” and “Pre-processing” from script “MicroLADA\_200220.Rmd” to generate files

```

Metadata <- read.delim(file="P:/CBMR/LADA/Text/Analysis/Metadata_200318.txt",
                      check.names=FALSE,
                      stringsAsFactors = FALSE,
                      strip.white=TRUE,
                      dec=",")

#Specify column types
Metadata <- Metadata %>% convert(chr(Metformin),
                               num(age, BMI))

#head(Metadata)
#confidential but metadata as colnames and samples as rownames

```

```

Taxonomy <- read.delim(file="P:/CBMR/LADA/Text/Analysis/Taxonomy_200318.txt",
                      check.names=FALSE,
                      stringsAsFactors = FALSE,
                      strip.white=TRUE,
                      dec=",")

#head(Taxonomy[,1:6])
#confidential but samples as colnames and features/genera as rownames

Feature <- read.delim(file="P:/CBMR/LADA/Text/Analysis/Feature_200318.txt",
                      check.names=FALSE,
                      stringsAsFactors = FALSE,
                      strip.white=TRUE,
                      dec=",")

head(Feature)

```

```

##   Kingdom      Phylum      Class      Order
## 1 Archaea Euryarchaeota Methanobacteria Methanobacteriales
## 2 Archaea Euryarchaeota Methanobacteria Methanobacteriales
## 3 Archaea Euryarchaeota Methanobacteria Methanobacteriales
## 4 Archaea Euryarchaeota Thermoplasmata Methanomassiliicoccales
## 5 Archaea Euryarchaeota Thermoplasmata Methanomassiliicoccales
## 6 Archaea Euryarchaeota Thermoplasmata Methanomassiliicoccales
##
##           Family      Genus
## 1   Methanobacteriaceae Methanobrevibacter
## 2   Methanobacteriaceae Methanosphaera
## 3   Methanobacteriaceae Family.Methanobacteriaceae.
## 4 Methanomassiliicoccaceae Methanomassiliicoccus
## 5 Methanomethylophilaceae Candidatus_Methanomethylophilus
## 6 Methanomethylophilaceae Family.Methanomethylophilaceae.

```

```

if (setequal(colnames(Taxonomy), Metadata$MicrobiomeID)==FALSE) {
  stop("Metadata and Taxonomy out of sync")
}

#Create syntactically valid variable names
Metadata$MicrobiomeID <- paste("L", Metadata$MicrobiomeID, sep="")
colnames(Taxonomy) <- Metadata$MicrobiomeID

#Order Diagnosis
Metadata$Diagnosis<-ordered(Metadata$Diagnosis,
                            levels=c("Control", "T1D", "LADA", "T2D"))

##Removing age below 30 at diagnosis of LADA
age<-c("LLADA079", "LLADA085", "LLADA082", "LLADA063")
#Ageinfo<-Metadata[match(age, Metadata$MicrobiomeID), ]
Metadata<-Metadata[-match(age, Metadata$MicrobiomeID), ]
##Applying subsetting to OTU tables
Taxonomy<-dplyr::select(Taxonomy, one_of(as.character(Metadata$MicrobiomeID)))

##Removing LADA that were not tested positive for GAD
GAD<-c("LLADA090", "LLADA076", "LLADA095", "LLADA070", "LLADA080")
#GADinfo<-Metadata[match(GAD, Metadata$MicrobiomeID), ]
Metadata<-Metadata[-match(GAD, Metadata$MicrobiomeID), ]

```

```

##Removing LADA with insufficient metadata available (lacking C-peptide measurement)
Ins<-c("LLADA005")
##Insinfo<-Metadata[match(Ins, Metadata$MicrobiomeID), ]
Metadata<-Metadata[-match(Ins, Metadata$MicrobiomeID), ]

##Applying subsetting to OTU tables
Taxonomy<-dplyr::select(Taxonomy, one_of(as.character(Metadata$MicrobiomeID)))

##Remove orgs that are not present after subsetting.
Taxonomy <- Taxonomy[rowSums(Taxonomy)>0,]

length(Taxonomy)

```

```
## [1] 230
```

```

##Filtering at the beginning of script
TaxonomyDA<-Taxonomy[length(Taxonomy)-rowSums(Taxonomy == 0) >= length(Taxonomy)/2,]

mean(colSums(TaxonomyDA)/colSums(Taxonomy))

```

```
## [1] 0.8889192
```

```
sd(colSums(TaxonomyDA)/colSums(Taxonomy))
```

```
## [1] 0.1107038
```

```
range(colSums(TaxonomyDA)/colSums(Taxonomy))
```

```
## [1] 0.2321024 0.9973209
```

```
hist(colSums(TaxonomyDA)/colSums(Taxonomy))
```

## Histogram of colSums(TaxonomyDA)/colSums(Taxonomy)

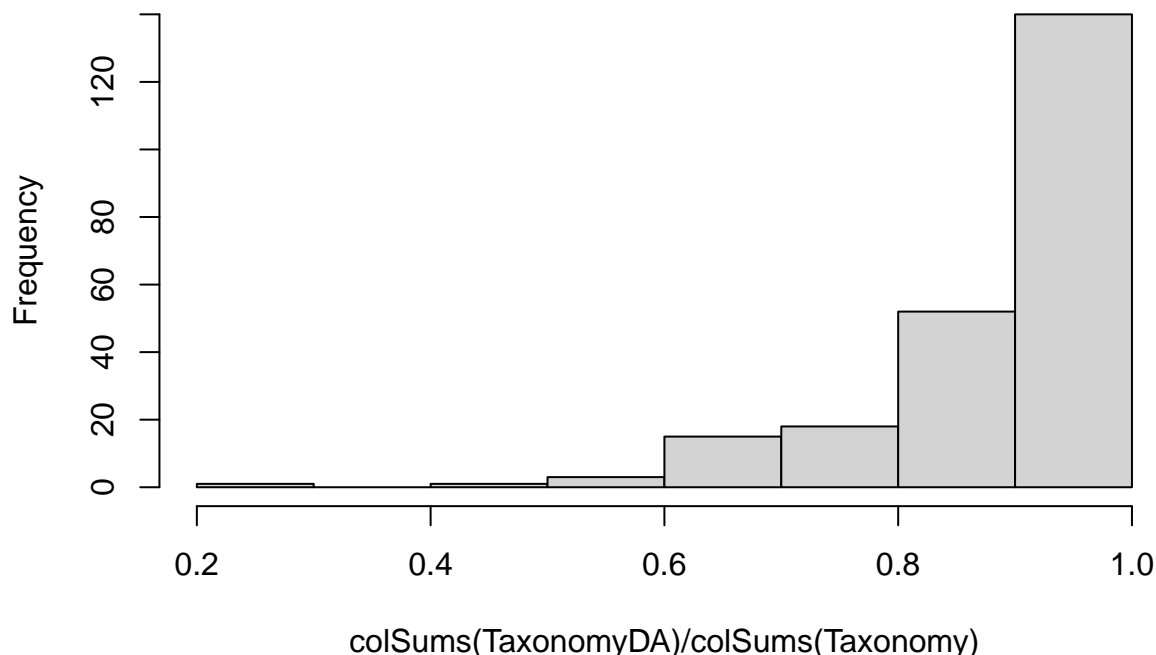

```
##Compared sample where many reads are removed due to 50% filtering
#samplebef<-select(Taxonomy, one_of("L606044"))
#samplefilter<-select(TaxonomyDA, one_of("L606044"))

##Used to provide medication overview
#write.table(Metadata, file="MetadataMedMerge.txt",
#           quote = F, row.names = F, sep="\t")

##See "StenoClean_LADA_Medication_CSP_220105.Rmd" for addition of medication
#Do not have information on medicine of controls
MetadataMed <- read.delim(file="../Metadata_Medication.txt",
                          check.names=FALSE,
                          stringsAsFactors = FALSE,
                          strip.white=TRUE)

#Encoding BMI
Metadata$BMIord <- ifelse(Metadata$BMI<18.5, "Under",
                          ifelse(Metadata$BMI>=18.5 & Metadata$BMI<25, "Normal",
                                  ifelse(Metadata$BMI>=25 & Metadata$BMI<30, "Over",
                                          ifelse(Metadata$BMI>=30 & Metadata$BMI<35, "Ob1",
                                                  ifelse(Metadata$BMI>=35 & Metadata$BMI<40, "Ob2",
                                                          ifelse(Metadata$BMI>=40, "Ob3",
                                                                  "Other"))))))))
MetadataMed$BMIord <- ifelse(MetadataMed$BMI<18.5, "Under",
                             ifelse(MetadataMed$BMI>=18.5 & MetadataMed$BMI<25, "Normal",
                                     ifelse(MetadataMed$BMI>=25 & MetadataMed$BMI<30, "Over",
```



```

    ifelse(MetadataMed$BMI>=30 & MetadataMed$BMI<35, "Ob1",
    ifelse(MetadataMed$BMI>=35 & MetadataMed$BMI<40, "Ob2",
    ifelse(MetadataMed$BMI>=40, "Ob3",
    "Other")))))
table(Metadata$BMIord) #Based on this could make 3 classes

```

```

##
## Normal    Ob1    Ob2    Ob3    Over    Under
##      54     45     22     6     102     1

```

```

#table(MetadataMed$BMIord)
Metadata$BMIclass <- ifelse(Metadata$BMI<25, "Class1",
    ifelse(Metadata$BMI>=25 & Metadata$BMI<30, "Class2",
    ifelse(Metadata$BMI>=30, "Class3",
    "Other")))
MetadataMed$BMIclass <- ifelse(MetadataMed$BMI<25, "Class1",
    ifelse(MetadataMed$BMI>=25 & MetadataMed$BMI<30, "Class2",
    ifelse(MetadataMed$BMI>=30, "Class3",
    "Other")))
table(Metadata$BMIclass)

```

```

##
## Class1 Class2 Class3
##      55     102     73

```

```

Metadata$BMIordclass <- factor(ifelse(Metadata$BMI<25, 1,
    ifelse(Metadata$BMI>=25 & Metadata$BMI<30, 2,
    ifelse(Metadata$BMI>=30, 3,
    "Other"))))
MetadataMed$BMIordclass <- factor(ifelse(MetadataMed$BMI<25, 1,
    ifelse(MetadataMed$BMI>=25 & MetadataMed$BMI<30, 2,
    ifelse(MetadataMed$BMI>=30, 3,
    "Other"))))

```

```

#Quartiles
Metadata$BMIq <- as.numeric(cut_number(Metadata$BMI,4))
MetadataMed$BMIq <- as.numeric(cut_number(MetadataMed$BMI,4))
#table(Metadata$BMIq)

```

## Used colors throughout script

```

#install.packages("viridis")
#install.packages("colorBlindness")
#install.packages("RColorBrewer")
library(viridis)
library(colorBlindness)
library(RColorBrewer)
display.brewer.pal(n=8, "Dark2")
display.brewer.pal(n=9, "Set1")
display.brewer.pal(n=12, "Paired")

```

```

colorBlindness::displayAllColors(viridis::viridis(10))
colorBlindness::displayAllColors(rainbow(10))
colorBlindness::displayAllColors(brewer.pal(n=12, "Paired")) #Should be color blind friendly
colorBlindness::displayAllColors(brewer.pal(n=12, "Set1"))
colorBlindness::displayAllColors(brewer.pal(n=12, "Dark2")) #Should be color blind friendly
colorBlindness::displayAllColors(brewer.pal(n=12, "Set2"))

#From paired but adding Grey from Dark2. Using dark version for
brewer.pal(n=12, "Paired")
brewer.pal(n=12, "Dark2")
brewer.pal(n=12, "Set2")

##From Paired
##"#A6CEE3" Proteobacteria
##"#1F78B4" T1D
##"#B2DF8A" Firmicutes
##"#33A02C" T2D
##"#FB9A99" Bacteroidetes
##"#E31A1C" LADA
##"#FDBF6F" Actinobacteria
##"#FF7F00"
##"#CAB2D6" Euryarchaeota
##"#6A3D9A"
##"#FFF999"
##"#B15928"

#From Dark2
##"#666666" Controls dark grey

#From Set2
##"#B3B3B3" Other light grey

colorBlindness::displayAllColors(c("#666666", "#1F78B4", "#E31A1C", "#33A02C",
                                   "#A6CEE3", "#B2DF8A", "#FB9A99", "#FDBF6F",
                                   "#CAB2D6", "#B3B3B3"))

```

Controls "#0000FF" Blue new "#666666" dark grey  
T1D "#FF0000" Red new "#1F78B4" dark blue  
T2D "#228B22" Green new "#33A02C" dark green LADA "#FFD700" Yellow new "#E31A1C" red

Proteobacteria "#3366CC" lightblue new "#005F6A" Petrol new "#A6CEE3" light blue  
Bacteroidetes "#DC3912" Redorange new "#9C58A1" Purple new "#FB9A99" pink  
Actinobacteria "#FF9900" Yelloworange new "#EF9F26" Orange new "#ADD8E6" light blue new  
"#00FFFF" Aqua new "#FDBF6F" orange Firmicutes "#109618" Green new "#97D0A7" Seafoam new  
"#B2DF8A" light green Euryarchaeota "#DD4477" Pink new "#CAB2D6" light purple  
Other "#B82E2E" Red new "#4C0013" Bordeaux new "#B3B3B3" light grey

Colors used from color brewer paired. The dark colors for diagnostic groups and light for the phyla for instance in cca and vulcano plots. To represent controls a dark grey was used, a light grey was used for other phyla. LADA is deliberately red to draw the readers attention.

## Analysis

### Summary metadata, quality of data and ecology

Used to create table 1

```
rm(list=setdiff(ls(), c("Metadata", "MetadataMed", "Feature", "TaxonomyDA", "Taxonomy")))

##Summary metadata and quality of data
#Adding cell count to infer absolute cell numbers
# old path path<-paste("Q:/",
#       "Projects/",
#       "LADA/",
#       "LADA_Sandra_Evelina/",
#       "LADA_JKV/",
#       "LADA_R_AfterFlow_Analysis_FinalCounts/",
#       "LADA_FinalCounts/",
#       "2019-09-03_CountAnalysis.rds", sep="")

path <- paste("J:/",
              "CBMR/",
              "SUN-CBMR-Hansen-Group/",
              "Projects/",
              "LADA/",
              "LADA_Sandra_Evelina/",
              "LADA_JKV/",
              "LADA_R_AfterFlow_Analysis_FinalCounts/",
              "LADA_FinalCounts/",
              "2019-09-03_CountAnalysis.rds", sep="")

TotalCounts<-readRDS(path)
TotalCountsProcess <-
  data.frame(MicrobiomeID=TotalCounts$DF_Save_w$ID,
             CellNorm=TotalCounts$DF_Save_w$Cells_per_g_feces_FR_corrected_mean)
TotalCountsProcess$MicrobiomeID <- paste("L", TotalCountsProcess$MicrobiomeID,
                                         sep="")

covariates<-merge(Metadata, TotalCountsProcess, by="MicrobiomeID")

#One value is NaN in sample L602059 assigns value as average
covariates$CellNorm[is.nan(covariates$CellNorm)]<-
  mean(na.omit(covariates$CellNorm))

covariates<-merge(covariates, data.frame(seq_depth=colSums(Taxonomy),
                                       MicrobiomeID=names(Taxonomy)),
                 by="MicrobiomeID")
print("Sex: male=1, female=2")

## [1] "Sex: male=1, female=2"

table(Metadata$sex, Metadata$Diagnosis)

##
```

```
##      Control T1D LADA T2D
##  1      44  17  37  44
##  2      26  13  23  26
```

```
print("Metformin: No treatment=0, treatment=1")
```

```
## [1] "Metformin: No treatment=0, treatment=1"
```

```
table(Metadata$Metformin, Metadata$Diagnosis)
```

```
##
##      Control T1D LADA T2D
##  0      70  30  12  23
##  1      0   0  48  47
```

```
print("Age, BMI and seq_depth")
```

```
## [1] "Age, BMI and seq_depth"
```

```
aggregate(covariates[, c(2:3, 9:10)], list(covariates$Diagnosis), mean)
```

```
##  Group.1      age      BMI BMIord BMIclass
## 1 Control 61.44243 26.67011     NA      NA
## 2   T1D 51.73196 26.66011     NA      NA
## 3   LADA 63.76249 28.92226     NA      NA
## 4   T2D 61.42814 31.27686     NA      NA
```

```
aggregate(covariates[, c(2:3, 9:10)], list(covariates$Diagnosis), sd)
```

```
##  Group.1      age      BMI BMIord BMIclass
## 1 Control 10.189143 3.722805     NA      NA
## 2   T1D  6.961407 4.555865     NA      NA
## 3   LADA 10.183290 4.866525     NA      NA
## 4   T2D  9.956564 5.512931     NA      NA
```

```
##Look into metadata if patient received metformin or not
```

```
print("Sex: male=1, female=2. Metformin: No treatment=0, treatment=1")
```

```
## [1] "Sex: male=1, female=2. Metformin: No treatment=0, treatment=1"
```

```
table(Metadata$sex, Metadata$Metformin)
```

```
##
##      0  1
##  1 78 64
##  2 57 31
```

```
print("Age, BMI and seq_depth")
```

```
## [1] "Age, BMI and seq_depth"
```

```
aggregate(covariates[, c(2:3, 9:10)], list(covariates$Metformin), mean)
```

```
##   Group.1   age      BMI BMIord BMIclass
## 1      0 60.12622 27.62709     NA      NA
## 2      1 61.70115 30.12390     NA      NA
```

```
aggregate(covariates[, c(2:3, 9:10)], list(covariates$Metformin), sd)
```

```
##   Group.1   age      BMI BMIord BMIclass
## 1      0 10.57613 4.706784     NA      NA
## 2      1 10.02674 5.276407     NA      NA
```

```
##Testing covariates
```

```
#Kruskal test
```

```
kruskal.test(BMI ~ Diagnosis, data=covariates)
```

```
##
```

```
## Kruskal-Wallis rank sum test
```

```
##
```

```
## data: BMI by Diagnosis
```

```
## Kruskal-Wallis chi-squared = 37.354, df = 3, p-value = 3.872e-08
```

```
kruskal.test(age ~ Diagnosis, data=covariates)
```

```
##
```

```
## Kruskal-Wallis rank sum test
```

```
##
```

```
## data: age by Diagnosis
```

```
## Kruskal-Wallis chi-squared = 31.529, df = 3, p-value = 6.576e-07
```

```
kruskal.test(CellNorm ~ Diagnosis, data=covariates)
```

```
##
```

```
## Kruskal-Wallis rank sum test
```

```
##
```

```
## data: CellNorm by Diagnosis
```

```
## Kruskal-Wallis chi-squared = 1.7778, df = 3, p-value = 0.6198
```

```
kruskal.test(seq_depth ~ Diagnosis, data=covariates)
```

```
##
```

```
## Kruskal-Wallis rank sum test
```

```
##
```

```
## data: seq_depth by Diagnosis
```

```
## Kruskal-Wallis chi-squared = 14.806, df = 3, p-value = 0.00199
```

```
#If significant Mann-Whitney pairwise post-test
pairwise.wilcox.test(covariates$BMI, covariates$Diagnosis,
                     p.adjust.method="bonferroni")
```

```
##
## Pairwise comparisons using Wilcoxon rank sum test with continuity correction
##
## data: covariates$BMI and covariates$Diagnosis
##
##      Control T1D      LADA
## T1D  1.00000 -          -
## LADA 0.03204 0.15124 -
## T2D  1e-07  0.00024 0.04139
##
## P value adjustment method: bonferroni
```

```
pairwise.wilcox.test(covariates$age, covariates$Diagnosis,
                     p.adjust.method="bonferroni")
```

```
##
## Pairwise comparisons using Wilcoxon rank sum test with continuity correction
##
## data: covariates$age and covariates$Diagnosis
##
##      Control T1D      LADA
## T1D  1.1e-05 -          -
## LADA 1          8.7e-07 -
## T2D  1          1.8e-05 1
##
## P value adjustment method: bonferroni
```

```
pairwise.wilcox.test(covariates$seq_depth, covariates$Diagnosis,
                     p.adjust.method="bonferroni")
```

```
##
## Pairwise comparisons using Wilcoxon rank sum test with continuity correction
##
## data: covariates$seq_depth and covariates$Diagnosis
##
##      Control T1D      LADA
## T1D  0.0514 -          -
## LADA 0.7095 0.0038 -
## T2D  1.0000 0.0054 1.0000
##
## P value adjustment method: bonferroni
```

```
##Plot rarefaction curves can decrease step for final plotting
#set.seed(1)
#rarecurve(t(Taxonomy), step=100, xlab="Annotated reads",
#          ylab="Genera", label=FALSE)
```

```

#Create rarefaction curves with colors according to categories
#Adding colors to the rarecurves according to experiment, Controls=#666666 (blue),
#T1D=#1F78B4 (red), T2D=#33A02C (forestgreen), LADA=#E31A1C (gold)
rare<-data.frame(t(Taxonomy))
rare<-add_rownames(rare, "MicrobiomeID")
rare<-merge(rare, Metadata, by="MicrobiomeID")
rare$colors<-ifelse(grepl("0", rare$group), "#666666",
                    ifelse(grepl("1", rare$group), "#1F78B4",
                            ifelse(grepl("2", rare$group), "#33A02C",
                                    ifelse(grepl("4", rare$group),
                                            "#E31A1C", "pink")))))

#table(rare$colors)
rare$line<-ifelse(grepl("0", rare$Metformin), "solid",
                  ifelse(grepl("1", rare$Metformin), "dotted", "longdash"))
#table(rare$line)

#Check order
if (setequal(colnames(Taxonomy), rare$MicrobiomeID)==FALSE) {
  stop("Taxonomy and Metadata is not corresponding with each other")
}

set.seed(1)
rarecurve(t(Taxonomy), step=500, xlab="Annotated reads", ylab="Genera",
          col=rare$colors,
          lty=rare$line, label=FALSE) #piphillin pathways 100000, else 100

```

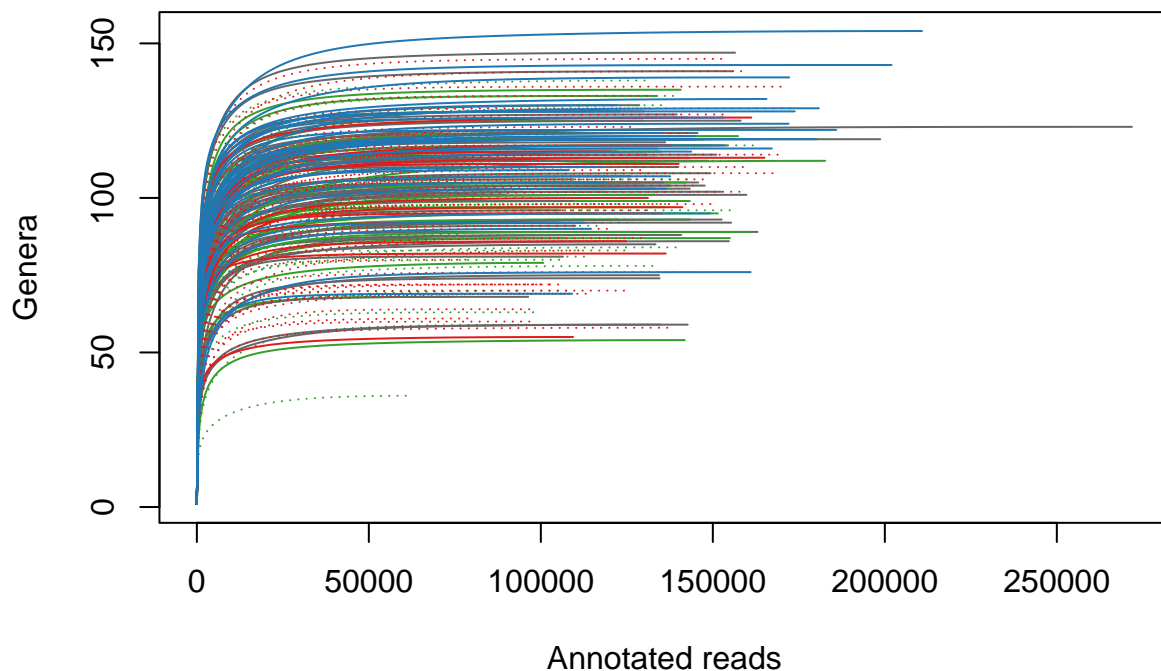

```
pdf(paste("MicroLADA_Rarecurve.pdf", sep=""), height=6, width=8)
rarecurve(t(Taxonomy), step=500, xlab="Annotated reads", ylab="Genera",
          col=rare$colors,
          lty=rare$line, label=FALSE)
dev.off()
```

```
## pdf
## 2
```

```
##Rank abundance curves
#Total sum scaling (Use relative abundances)
Taxonomy2<-sweep(Taxonomy, 2, colSums(Taxonomy), FUN="/")

##RAC all and diagnostic groupings
pdf(paste("MicroLADA_RAC", ".pdf", sep=""), width=12, height=6)
par(mfrow=c(1,5))
Subset <- c("All", "Control", "T1D", "LADA", "T2D")

for (i in Subset) {
  #Subsetting Metadata according to
  if (i=="All") {
    Metadata2 <- Metadata
  } else if (i=="Control") {
    Metadata2<-filter(Metadata, Diagnosis == "Control")
  } else if (i=="T1D") {
    Metadata2<-filter(Metadata, Diagnosis == "T1D")
  } else if (i=="LADA") {
    Metadata2<-filter(Metadata, Diagnosis == "LADA")
  } else if (i=="T2D") {
    Metadata2<-filter(Metadata, Diagnosis == "T2D")
  } else {
    print("Subset defined not valid")
  }

  #Applying subsetting to OTU tables, have already TSS
  Taxonomy3<-dplyr::select(Taxonomy2, one_of(as.character(Metadata2$MicrobiomeID)))
  #Setting up ranks
  RankAbun.1 <- rankabundance(t(Taxonomy3))
  #Create RACplot
  rankabunplot(RankAbun.1, scale='proportion', addit=FALSE, specnames=c(1,2,3,4,5),
              xlim=c(0,60), main=i)
}
dev.off()
```

```
## pdf
## 2
```

```
#Include in pdf
Subset <- c("All", "Control", "T1D", "LADA", "T2D")
for (i in Subset) {
  #Subsetting Metadata according to
  if (i=="All") {
```



```

Metadata2 <- Metadata
} else if (i=="Control") {
  Metadata2<-filter(Metadata, Diagnosis == "Control")
} else if (i=="T1D") {
  Metadata2<-filter(Metadata, Diagnosis == "T1D")
} else if (i=="LADA") {
  Metadata2<-filter(Metadata, Diagnosis == "LADA")
} else if (i=="T2D") {
  Metadata2<-filter(Metadata, Diagnosis == "T2D")
} else {
  print("Subset defined not valid")
}

#Applying subsetting to OTU tables, have already TSS
Taxonomy3<-dplyr::select(Taxonomy2, one_of(as.character(Metadata2$MicrobiomeID)))
#Setting up ranks
RankAbun.1 <- rankabundance(t(Taxonomy3))
#Create RACplot
rankabunplot(RankAbun.1, scale='proportion', addit=FALSE, specnames=c(1,2,3,4,5),
             xlim=c(0,60), main=i)
}

```

## All

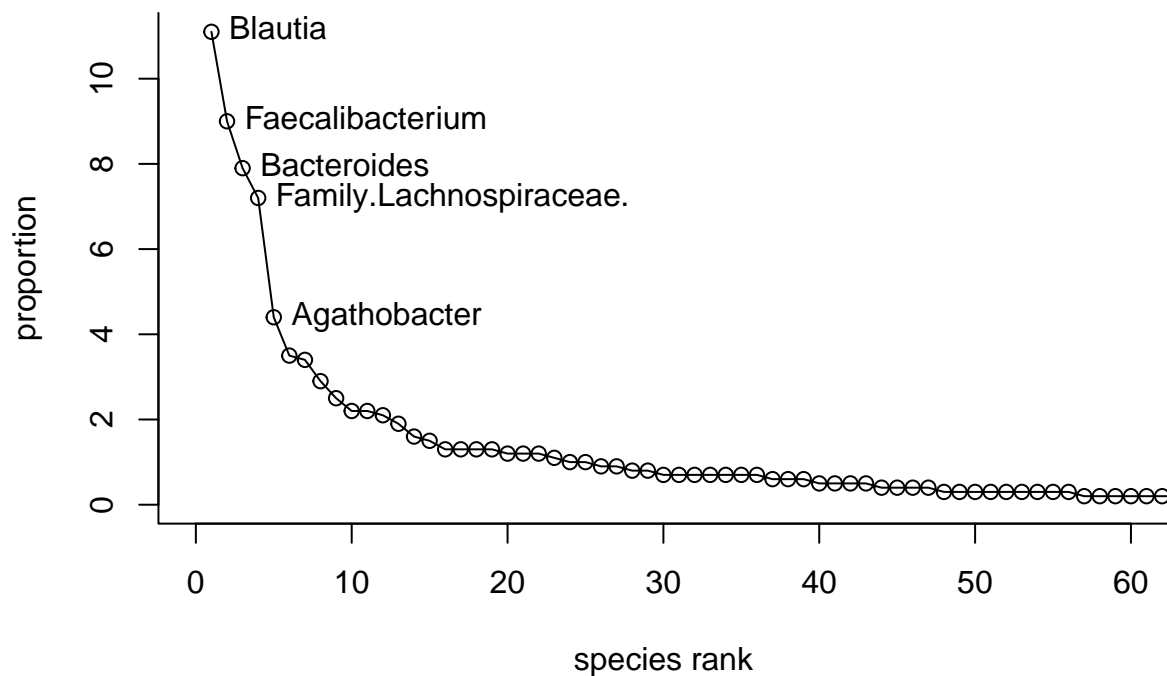

# Control

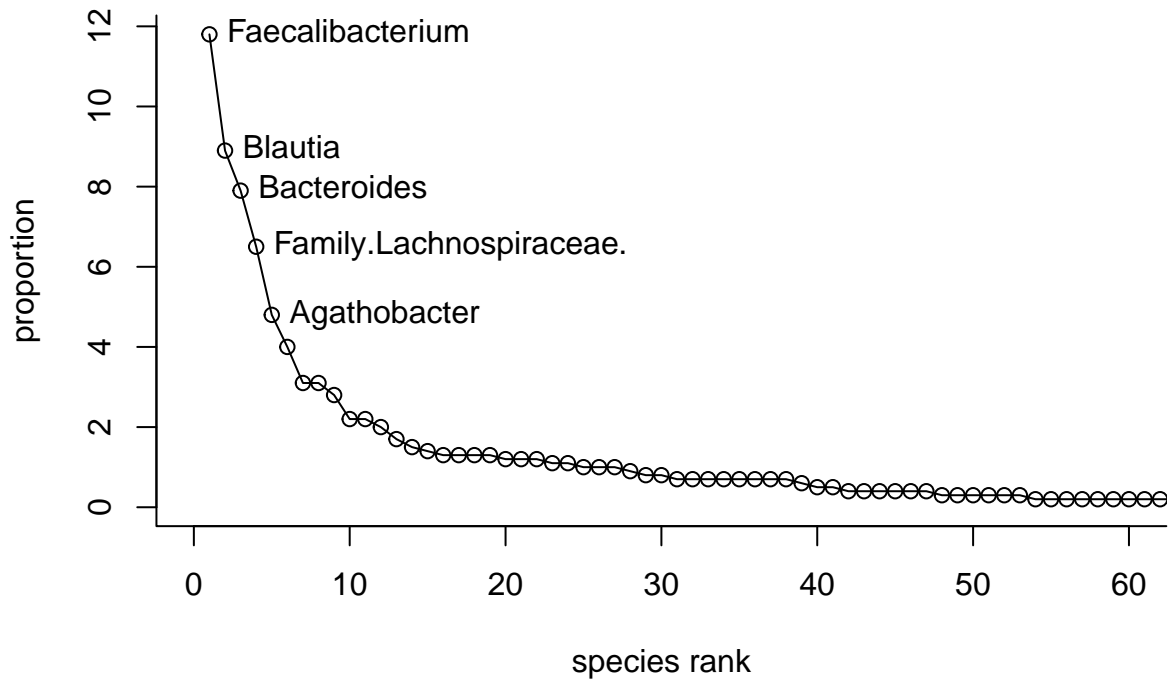

# T1D

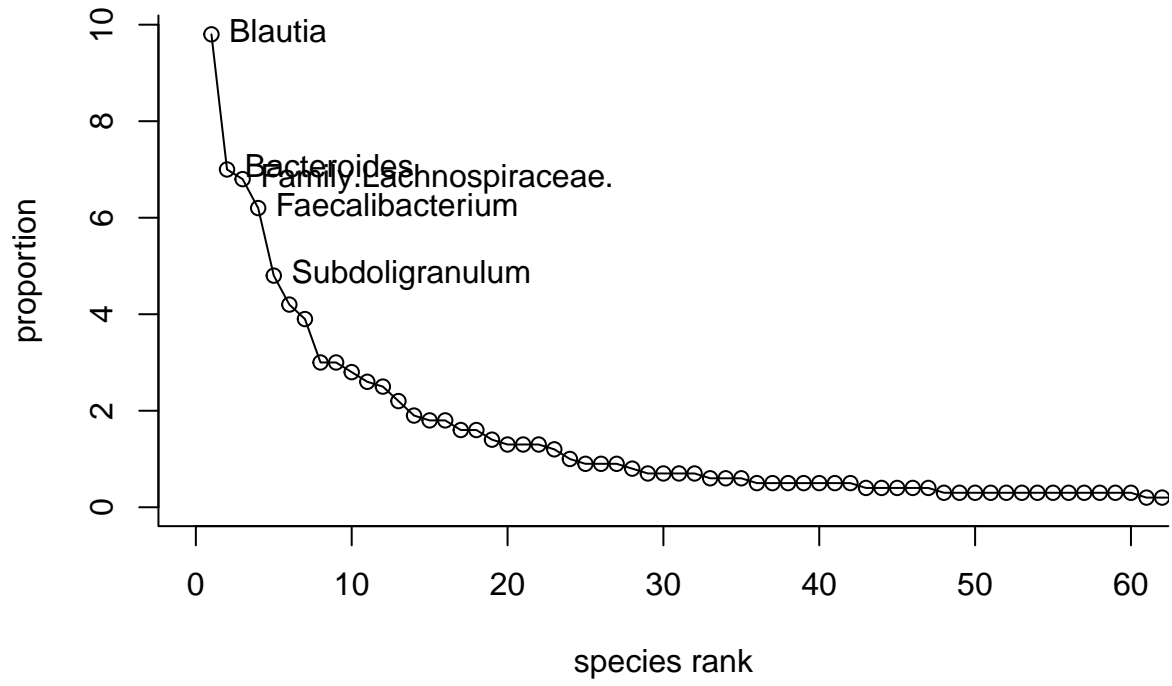

# LADA

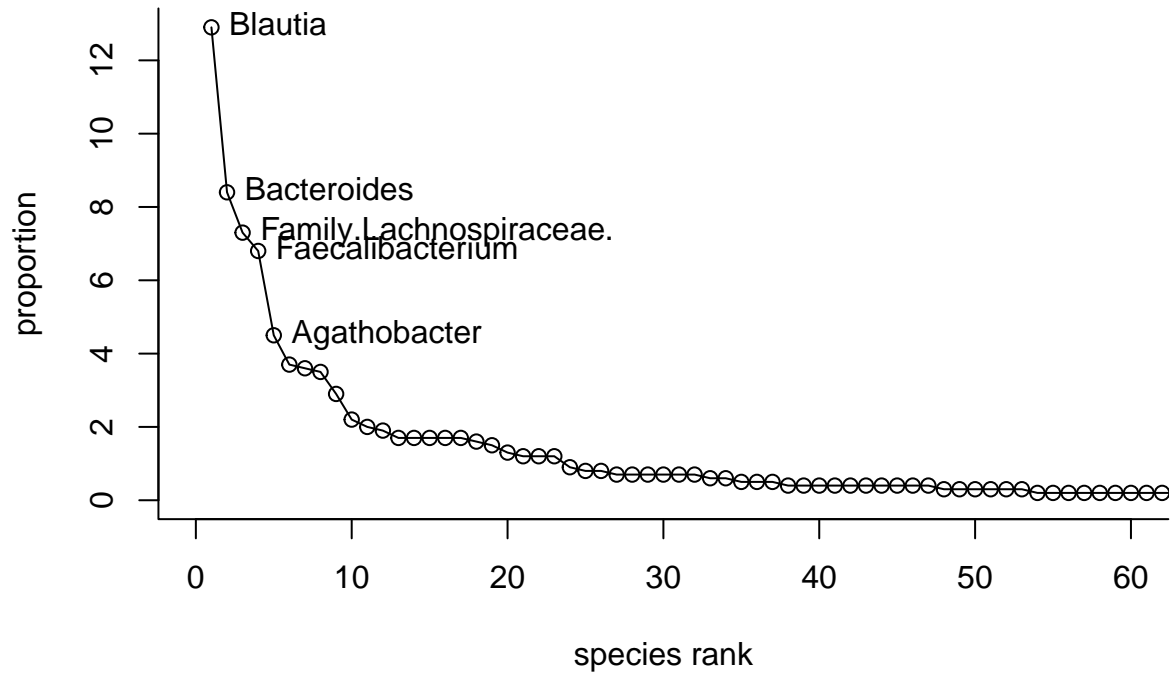

## T2D

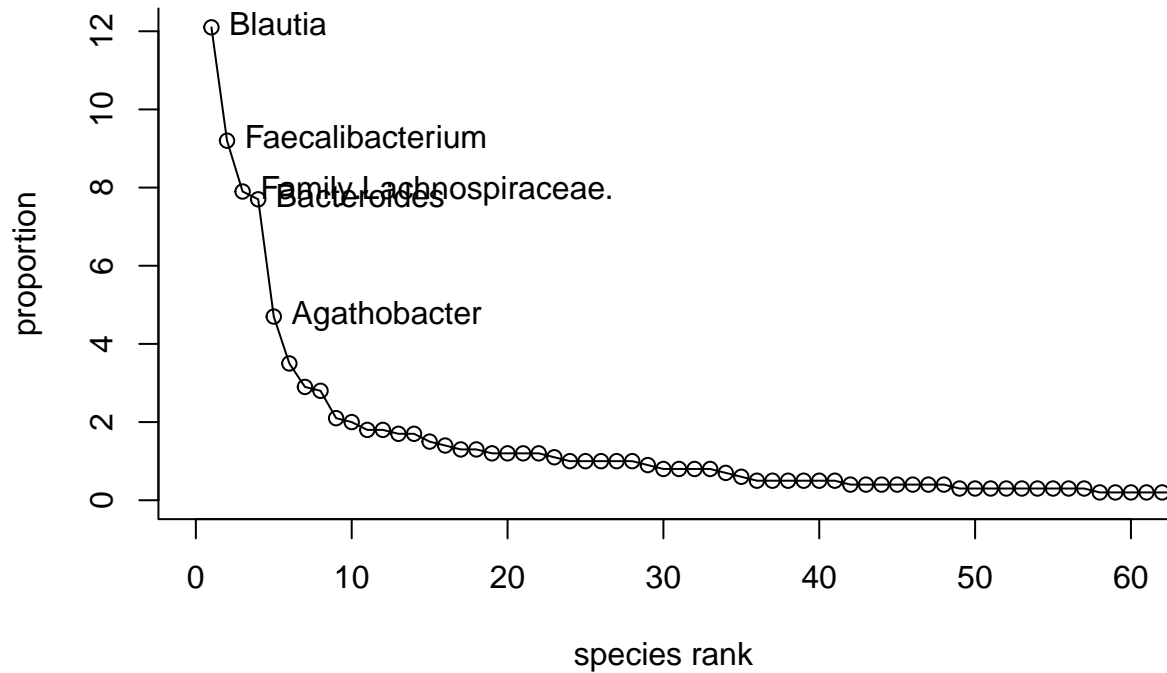

```
#Additional metadata
MetadataEkstra <- read.csv(file="P:/CBMR/LADA/Text/Analysis/LADA_microbiome_extra_metadata.txt",
                           check.names=FALSE,
                           stringsAsFactors = FALSE,
                           strip.white=TRUE,
                           dec=".")

MetadataEkstra$MicrobiomeID <- paste("L", MetadataEkstra$MicrobiomeID,
                                     sep="")

#Merge with previous metadata
covariates <- merge(covariates, MetadataEkstra[,c(1,12:length(MetadataEkstra))])

#Aggregate diagnosis mean and sd
aggregate(covariates[, c(2:3, 12:length(covariates))], list(covariates$Diagnosis), mean,
          na.rm=TRUE)
```

| ##   | Group.1   | age      | BMI      | BMIq      | CellNorm       | seq_depth | waist     | hip      |
|------|-----------|----------|----------|-----------|----------------|-----------|-----------|----------|
| ## 1 | Control   | 61.44243 | 26.67011 | 2.042857  | 20384275367    | 135669.1  | 92.89714  | 101.4143 |
| ## 2 | T1D       | 51.73196 | 26.66011 | 2.066667  | 18731782275    | 150154.5  | 98.30000  | 106.1833 |
| ## 3 | LADA      | 63.76249 | 28.92226 | 2.583333  | 18940404238    | 127868.0  | 103.21667 | 107.3333 |
| ## 4 | T2D       | 61.42814 | 31.27686 | 3.071429  | 19624620327    | 129389.5  | 107.45588 | 107.6324 |
| ##   | whr       | sbp      | dbp      | hba1c_pct | hba1c_mmol_mol | glu       | chol      |          |
| ## 1 | 0.9160348 | 135.7643 | 81.03571 | 5.674286  | 38.47143       | 5.765714  | 5.444286  |          |
| ## 2 | 0.9241084 | 137.3500 | 75.98333 | 8.853333  | 73.26073       | 9.740000  | 4.860000  |          |

```
## 3 0.9602380 131.6278 77.80556 7.920580 63.06667 8.803333 4.201667
## 4 0.9978302 136.1159 79.89130 6.867143 51.55365 8.477941 4.651429
##      hdl      ldl      trig
## 1 1.369286 3.470000 1.344857
## 2 1.406333 2.703448 1.364333
## 3 1.331833 2.057627 1.729167
## 4 1.210429 2.537879 1.954857
```

```
aggregate(covariates[, c(2:3, 12:length(covariates))], list(covariates$Diagnosis), sd,
          na.rm=TRUE)
```

```
##   Group.1      age      BMI      BMIq  CellNorm seq_depth  waist  hip
## 1 Control 10.189143 3.722805 0.9696214 6781846681 25597.96 10.80459 7.671692
## 2   T1D  6.961407 4.555865 1.2015316 5712095609 27690.10 12.71206 7.790891
## 3   LADA 10.183290 4.866525 1.1393079 5544046390 23620.93 14.49148 9.553891
## 4   T2D  9.956564 5.512931 0.9528208 6146706989 23218.59 13.53319 9.787144
##      whr      sbp      dbp hba1c_pct hba1c_mmol_mol  glu  chol
## 1 0.08380676 18.33301 10.241052 0.3561817 3.907338 0.4845095 1.126574
## 2 0.08055011 21.20026 10.346150 0.8076075 8.826342 4.2322734 1.324725
## 3 0.09391664 17.78699 7.853962 1.1954893 13.065502 2.9649916 1.019054
## 4 0.08120027 16.47573 10.378098 1.2696823 13.876358 2.7289408 1.343017
##      hdl      ldl      trig
## 1 0.3772260 1.0489954 0.8167996
## 2 0.4137422 0.7248068 0.9030855
## 3 0.3909939 0.7788593 1.0163315
## 4 0.3592038 1.0221794 1.2446846
```

```
#Aggregate sex mean and sd
```

```
aggregate(covariates[, c(2:3, 12:length(covariates))], list(covariates$sex), mean,
          na.rm=TRUE)
```

```
##   Group.1      age      BMI      BMIq  CellNorm seq_depth  waist  hip
## 1      1 59.92969 28.55643 2.464789 20272037367 132059.5 103.06549 103.8380
## 2      2 62.14355 28.82288 2.556818 18413308125 136117.8 96.70349 108.1221
##      whr      sbp      dbp hba1c_pct hba1c_mmol_mol  glu  chol
## 1 0.9906106 135.4178 80.06338 7.048703 53.54204 7.912857 4.645775
## 2 0.8912291 134.3027 77.74521 7.020671 53.18873 7.871591 5.055682
##      hdl      ldl      trig
## 1 1.228028 2.644928 1.692183
## 2 1.457955 2.851163 1.538295
```

```
aggregate(covariates[, c(2:3, 12:length(covariates))], list(covariates$sex), sd,
          na.rm=TRUE)
```

```
##   Group.1      age      BMI      BMIq  CellNorm seq_depth  waist  hip
## 1      1 10.32654 4.689904 1.108714 6154527421 25160.23 12.78662 7.423021
## 2      2 10.32517 5.701434 1.153286 5972255901 26073.67 15.37737 11.148710
##      whr      sbp      dbp hba1c_pct hba1c_mmol_mol  glu  chol
## 1 0.07681929 16.90142 9.60506 1.469174 16.05979 2.926826 1.198499
## 2 0.07928849 19.87744 10.05909 1.503488 16.46194 3.134126 1.375973
##      hdl      ldl      trig
## 1 0.3401986 1.056925 1.1107317
## 2 0.4118005 1.116164 0.9472746
```

```

#Test differences
df<-data.frame()
for (i in c(2:3, 12:length(covariates))) {
  design<-paste(colnames(covariates[i]), "~ Diagnosis")
  #Run kruskal-wallis test
  kwoject<-kruskal.test(formula(design), data=covariates)
  #print(kwoject)
  #Run follow up mann-whitney
  mwobject<-pairwise.wilcox.test(covariates[,i], covariates[,8],
                                p.adjust.method="bonferroni")
  #print(mwobject)
  #Bind all test
  df<-rbind(df, data.frame(kwoject$data.name, kwoject$statistic, kwoject$p.value,
                          mwobject$p.value[1,1], mwobject$p.value[2,1], mwobject$p.value[3,1],
                          mwobject$p.value[2,2], mwobject$p.value[3,2], mwobject$p.value[3,3]))
}

colnames(df)<-c("Design", "chistat", "kw p-value (p)", "mw p control vs T1D",
              "mw p control vs LADA", "mw p control vs T2D", "mw p T1D vs LADA",
              "mw p-value T1D vs T2D","mw p-value LADA vs T2D")
kable(df[, 1:5], row.names=FALSE)

```

| Design                      | chistat    | kw p-value (p) | mw p control vs T1D | mw p control vs LADA |
|-----------------------------|------------|----------------|---------------------|----------------------|
| age by Diagnosis            | 31.529338  | 0.0000007      | 0.0000109           | 1.0000000            |
| BMI by Diagnosis            | 37.354166  | 0.0000000      | 1.0000000           | 0.0320433            |
| BMIq by Diagnosis           | 34.423317  | 0.0000002      | 1.0000000           | 0.0397857            |
| CellNorm by Diagnosis       | 1.777821   | 0.6197731      | 1.0000000           | 1.0000000            |
| seq_depth by Diagnosis      | 14.805968  | 0.0019902      | 0.0514030           | 0.7094970            |
| waist by Diagnosis          | 41.517971  | 0.0000000      | 0.5295941           | 0.0001757            |
| hip by Diagnosis            | 22.464307  | 0.0000522      | 0.0206165           | 0.0015338            |
| whr by Diagnosis            | 29.216784  | 0.0000020      | 1.0000000           | 0.0531195            |
| sbp by Diagnosis            | 3.275907   | 0.3510101      | 1.0000000           | 0.8702673            |
| dbp by Diagnosis            | 7.564246   | 0.0559305      | 0.1759817           | 0.1800562            |
| hba1c_pct by Diagnosis      | 158.089616 | 0.0000000      | 0.0000000           | 0.0000000            |
| hba1c_mmol_mol by Diagnosis | 157.723084 | 0.0000000      | 0.0000000           | 0.0000000            |
| glu by Diagnosis            | 95.326163  | 0.0000000      | 0.0000018           | 0.0000000            |
| chol by Diagnosis           | 40.847549  | 0.0000000      | 0.0137855           | 0.0000000            |
| hdl by Diagnosis            | 10.868167  | 0.0124605      | 1.0000000           | 1.0000000            |
| ldl by Diagnosis            | 57.755456  | 0.0000000      | 0.0011958           | 0.0000000            |
| trig by Diagnosis           | 20.304425  | 0.0001468      | 1.0000000           | 0.0502674            |

```
kable(df[, c(1, 6:9)], row.names=FALSE)
```

| Design                | mw p control vs T2D | mw p T1D vs LADA | mw p-value T1D vs T2D | mw p-value LADA vs T2D |
|-----------------------|---------------------|------------------|-----------------------|------------------------|
| age by Diagnosis      | 1.0000000           | 0.0000009        | 0.0000177             | 1.0000000              |
| BMI by Diagnosis      | 0.0000001           | 0.1512350        | 0.0002367             | 0.0413942              |
| BMIq by Diagnosis     | 0.0000001           | 0.2511605        | 0.0008957             | 0.0857981              |
| CellNorm by Diagnosis | 1.0000000           | 1.0000000        | 1.0000000             | 1.0000000              |

| Design                      | mw p control vs T2D | mw p T1D vs LADA | mw p-value T1D vs T2D | mw p-value LADA vs T2D |
|-----------------------------|---------------------|------------------|-----------------------|------------------------|
| seq_depth by Diagnosis      | 1.0000000           | 0.0037655        | 0.0053844             | 1.0000000              |
| waist by Diagnosis          | 0.0000000           | 0.5796713        | 0.0157666             | 0.9439178              |
| hip by Diagnosis            | 0.0001607           | 1.0000000        | 1.0000000             | 1.0000000              |
| whr by Diagnosis            | 0.0000026           | 0.4417814        | 0.0009814             | 0.2648907              |
| sbp by Diagnosis            | 1.0000000           | 1.0000000        | 1.0000000             | 0.6594205              |
| dbp by Diagnosis            | 1.0000000           | 1.0000000        | 0.4748683             | 1.0000000              |
| hba1c_pct by Diagnosis      | 0.0000000           | 0.0000212        | 0.0000000             | 0.0000000              |
| hba1c_mmol_mol by Diagnosis | 0.0000000           | 0.0000212        | 0.0000000             | 0.0000000              |
| glu by Diagnosis            | 0.0000000           | 0.9620485        | 0.3009942             | 1.0000000              |
| chol by Diagnosis           | 0.0003009           | 0.0396162        | 1.0000000             | 0.7831524              |
| hdl by Diagnosis            | 0.0212935           | 1.0000000        | 0.0887728             | 0.2690728              |
| ldl by Diagnosis            | 0.0000060           | 0.0032265        | 0.6392474             | 0.1175232              |
| trig by Diagnosis           | 0.0005226           | 0.1705718        | 0.0098608             | 1.0000000              |

```
#Diagnostic criteria
T1D<-filter(covariates, Diagnosis=="T1D")
range(T1D$hba1c_pct)
```

```
## [1] 7.6 11.0
```

```
Controls<-filter(covariates, Diagnosis=="Control")
range(Controls$glu)
```

```
## [1] 4.2 6.8
```

```
range(Controls$hba1c_pct)
```

```
## [1] 4.8 6.2
```

### Summary metadata, quality of data and ecology Metformin removed

```
rm(list=setdiff(ls(), c("Metadata", "MetadataMed", "Feature", "TaxonomyDA", "Taxonomy")))
##Removing treated with metformin
#Metadata$Metformin <- ifelse(is.na(Metadata$Metformin), "Unknow", Metadata$Metformin)
Metadata2<-filter(Metadata, !Metformin == 1)
##Applying subsetting to OTU tables
Taxonomy2<-dplyr::select(Taxonomy, one_of(as.character(Metadata2$MicrobiomeID)))
##Remove orgs that are not present after subsetting.
Taxonomy2 <- Taxonomy2[rowSums(Taxonomy2)>0,]

##Summary metadata and quality of data
#Adding cell count to infer absolute cell numbers
# old path path<-paste("Q:/",
#                       "Projects/",
#                       "LADA/",
```



```

#         "LADA_Sandra_Evelina/",
#         "LADA_JKV/",
#         "LADA_R_AfterFlow_Analysis_FinalCounts/",
#         "LADA_FinalCounts/",
#         "2019-09-03_CountAnalysis.rds", sep="")

path <- paste("J:/",
             "CBMR/",
             "SUN-CBMR-Hansen-Group/",
             "Projects/",
             "LADA/",
             "LADA_Sandra_Evelina/",
             "LADA_JKV/",
             "LADA_R_AfterFlow_Analysis_FinalCounts/",
             "LADA_FinalCounts/",
             "2019-09-03_CountAnalysis.rds", sep="")

TotalCounts<-readRDS(path)
TotalCountsProcess <-
  data.frame(MicrobiomeID=TotalCounts$DF_Save_w$ID,
             CellNorm=TotalCounts$DF_Save_w$Cells_per_g_feces_FR_corrected_mean)
TotalCountsProcess$MicrobiomeID <- paste("L", TotalCountsProcess$MicrobiomeID,
                                         sep="")
covariates<-merge(Metadata2, TotalCountsProcess, by="MicrobiomeID")

#One value is NaN in sample L602059 assigns value as average
covariates$CellNorm[is.nan(covariates$CellNorm)]<-
  mean(na.omit(covariates$CellNorm))

covariates<-merge(covariates, data.frame(seq_depth=colSums(Taxonomy2),
                                         MicrobiomeID=names(Taxonomy2)),
                 by="MicrobiomeID")
print("Sex: male=1, female=2")

## [1] "Sex: male=1, female=2"

table(Metadata2$sex, Metadata2$Diagnosis)

##
##      Control T1D LADA T2D
##  1         44  17   5  12
##  2         26  13   7  11

print("Metformin: No treatment=0, treatment=1")

## [1] "Metformin: No treatment=0, treatment=1"

table(Metadata2$Metformin, Metadata2$Diagnosis)

##
##      Control T1D LADA T2D
##  0         70  30  12  23

```

```
print("Age, BMI and seq_depth")
```

```
## [1] "Age, BMI and seq_depth"
```

```
aggregate(covariates[, c(2:3, 9:10)], list(covariates$Diagnosis), mean)
```

```
##   Group.1      age      BMI BMIord BMIclass
## 1 Control 61.44243 26.67011     NA      NA
## 2      T1D 51.73196 26.66011     NA      NA
## 3      LADA 66.61670 28.20713     NA      NA
## 4      T2D 63.68304 31.49826     NA      NA
```

```
aggregate(covariates[, c(2:3, 9:10)], list(covariates$Diagnosis), sd)
```

```
##   Group.1      age      BMI BMIord BMIclass
## 1 Control 10.189143 3.722805     NA      NA
## 2      T1D  6.961407 4.555865     NA      NA
## 3      LADA 12.720776 5.022780     NA      NA
## 4      T2D  8.549262 5.608501     NA      NA
```

```
##Look into metadata if patient received metformin or not
```

```
print("Sex: male=1, female=2. Metformin: No treatment=0, treatment=1")
```

```
## [1] "Sex: male=1, female=2. Metformin: No treatment=0, treatment=1"
```

```
table(Metadata2$sex, Metadata2$Metformin)
```

```
##
##      0
## 1 78
## 2 57
```

```
print("Age, BMI and seq_depth")
```

```
## [1] "Age, BMI and seq_depth"
```

```
aggregate(covariates[, c(2:3, 9:10)], list(covariates$Metformin), mean)
```

```
##   Group.1      age      BMI BMIord BMIclass
## 1      0 60.12622 27.62709     NA      NA
```

```
aggregate(covariates[, c(2:3, 9:10)], list(covariates$Metformin), sd)
```

```
##   Group.1      age      BMI BMIord BMIclass
## 1      0 10.57613 4.706784     NA      NA
```

```

##Testing covariates
#Kruskal test
kruskal.test(BMI ~ Diagnosis, data=covariates)

##
## Kruskal-Wallis rank sum test
##
## data: BMI by Diagnosis
## Kruskal-Wallis chi-squared = 16.525, df = 3, p-value = 0.0008847

kruskal.test(age ~ Diagnosis, data=covariates)

##
## Kruskal-Wallis rank sum test
##
## data: age by Diagnosis
## Kruskal-Wallis chi-squared = 30.881, df = 3, p-value = 9.006e-07

kruskal.test(CellNorm ~ Diagnosis, data=covariates)

##
## Kruskal-Wallis rank sum test
##
## data: CellNorm by Diagnosis
## Kruskal-Wallis chi-squared = 9.1305, df = 3, p-value = 0.02761

kruskal.test(seq_depth ~ Diagnosis, data=covariates)

##
## Kruskal-Wallis rank sum test
##
## data: seq_depth by Diagnosis
## Kruskal-Wallis chi-squared = 7.8999, df = 3, p-value = 0.04813

#If significant Mann-Whitney pairwise post-test
pairwise.wilcox.test(covariates$BMI, covariates$Diagnosis,
                    p.adjust.method="bonferroni")

##
## Pairwise comparisons using Wilcoxon rank sum test with continuity correction
##
## data: covariates$BMI and covariates$Diagnosis
##
##      Control T1D      LADA
## T1D  1.00000 -          -
## LADA 1.00000 1.00000 -
## T2D  0.00059 0.00504 0.68860
##
## P value adjustment method: bonferroni

```

```
pairwise.wilcox.test(covariates$age, covariates$Diagnosis,
                     p.adjust.method="bonferroni")
```

```
##
## Pairwise comparisons using Wilcoxon rank sum test with continuity correction
##
## data: covariates$age and covariates$Diagnosis
##
##      Control T1D      LADA
## T1D  1.1e-05 -        -
## LADA 0.79832 0.00057 -
## T2D  1.00000 7.8e-06 1.00000
##
## P value adjustment method: bonferroni
```

```
pairwise.wilcox.test(covariates$seq_depth, covariates$Diagnosis,
                     p.adjust.method="bonferroni")
```

```
##
## Pairwise comparisons using Wilcoxon rank sum test with continuity correction
##
## data: covariates$seq_depth and covariates$Diagnosis
##
##      Control T1D      LADA
## T1D  0.051 -        -
## LADA 1.000  0.407 -
## T2D  1.000  0.293 1.000
##
## P value adjustment method: bonferroni
```

```
##Plot rarefaction curves can decrease step for final plotting
#set.seed(1)
#rarecurve(t(Taxonomy), step=100, xlab="Annotated reads",
# ylab="Genera", label=FALSE)

#Create rarefaction curves with colors according to categories
#Adding colors to the rarecurves according to experiment, Controls=#666666 (blue),
#T1D=#1F78B4 (red), T2D=#33A02C (forestgreen), LADA=#E31A1C (gold)
rare<-data.frame(t(Taxonomy2))
rare<-add_rownames(rare, "MicrobiomeID")
rare<-merge(rare, Metadata2, by="MicrobiomeID")
rare$colors<-ifelse(grepl("0", rare$group), "#666666",
                    ifelse(grepl("1", rare$group), "#1F78B4",
                            ifelse(grepl("2", rare$group), "#33A02C",
                                    ifelse(grepl("4", rare$group),
                                            "#E31A1C", "pink")))))

#table(rare$colors)
rare$line<-ifelse(grepl("0", rare$Metformin), "solid",
                  ifelse(grepl("1", rare$Metformin), "dotted", "longdash"))
#table(rare$line)

#Check order
```

```

if (setequal(colnames(Taxonomy2), rare$MicrobiomeID)==FALSE) {
  stop("Taxonomy and Metadata is not corresponding with each other")
}

set.seed(1)
rarecurve(t(Taxonomy2), step=500, xlab="Annotated reads", ylab="Genera",
          col=rare$colors,
          lty=rare$line, label=FALSE) #piphillin pathways 100000, else 100

```

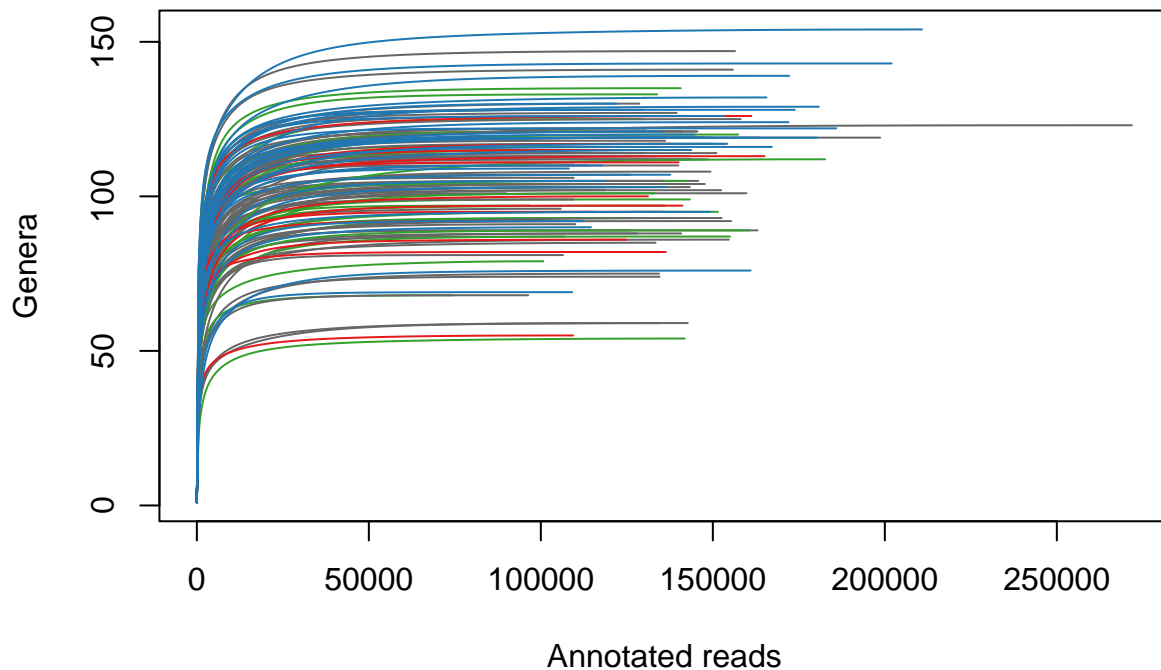

```

pdf(paste("MicroLADA_Rarecurve_MetRem.pdf", sep=""), height=6, width=8)
rarecurve(t(Taxonomy2), step=500, xlab="Annotated reads", ylab="Genera",
          col=rare$colors,
          lty=rare$line, label=FALSE)
dev.off()

```

```

## pdf
## 2

```

```

##Rank abundance curves
#Total sum scaling (Use relative abundances)
Taxonomy2<-sweep(Taxonomy2, 2, colSums(Taxonomy2), FUN="/")

##RAC all and diagnostic groupings
pdf(paste("MicroLADA_RAC_MetRem", ".pdf", sep=""), width=12, height=6)

```

```

par(mfrow=c(1,5))
Subset <- c("All", "Control", "T1D", "LADA", "T2D")

for (i in Subset) {
  #Subsetting Metadata according to
  if (i=="All") {
    Metadata3 <- Metadata2
  } else if (i=="Control") {
    Metadata3<-filter(Metadata2, Diagnosis == "Control")
  } else if (i=="T1D") {
    Metadata3<-filter(Metadata2, Diagnosis == "T1D")
  } else if (i=="LADA") {
    Metadata3<-filter(Metadata2, Diagnosis == "LADA")
  } else if (i=="T2D") {
    Metadata3<-filter(Metadata2, Diagnosis == "T2D")
  } else {
    print("Subset defined not valid")
  }

  #Applying subsetting to OTU tables, have already TSS
  Taxonomy3<-dplyr::select(Taxonomy2, one_of(as.character(Metadata3$MicrobiomeID)))
  #Setting up ranks
  RankAbun.1 <- rankabundance(t(Taxonomy3))
  #Create RACplot
  rankabunplot(RankAbun.1, scale='proportion', addit=FALSE, specnames=c(1,2,3,4,5),
               xlim=c(0,60), main=i)
}
dev.off()

```

```

## pdf
## 2

```

```

#Include in pdf
Subset <- c("All", "Control", "T1D", "LADA", "T2D")
for (i in Subset) {
  #Subsetting Metadata according to
  if (i=="All") {
    Metadata3 <- Metadata2
  } else if (i=="Control") {
    Metadata3<-filter(Metadata2, Diagnosis == "Control")
  } else if (i=="T1D") {
    Metadata3<-filter(Metadata2, Diagnosis == "T1D")
  } else if (i=="LADA") {
    Metadata3<-filter(Metadata2, Diagnosis == "LADA")
  } else if (i=="T2D") {
    Metadata3<-filter(Metadata2, Diagnosis == "T2D")
  } else {
    print("Subset defined not valid")
  }

  #Applying subsetting to OTU tables, have already TSS
  Taxonomy3<-dplyr::select(Taxonomy2, one_of(as.character(Metadata3$MicrobiomeID)))
  #Setting up ranks

```

```
RankAbun.1 <- rankabundance(t(Taxonomy3))
#Create RACplot
rankabunplot(RankAbun.1, scale='proportion', addit=FALSE, specnames=c(1,2,3,4,5),
             xlim=c(0,60), main=i)
}
```

## All

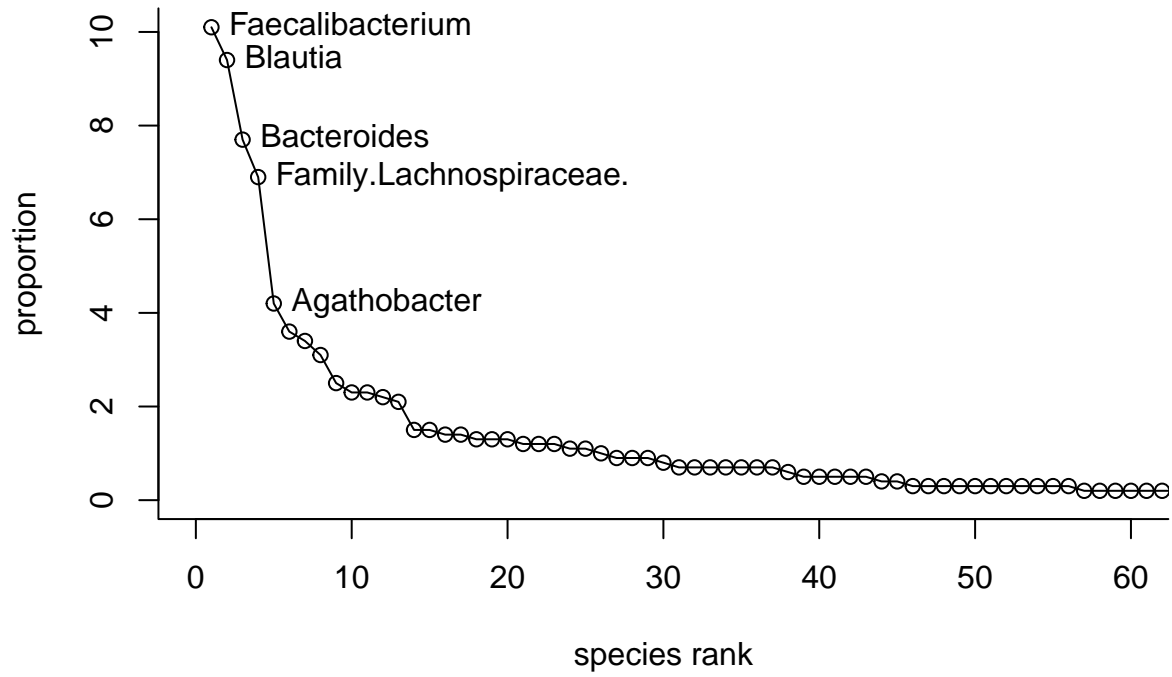

# Control

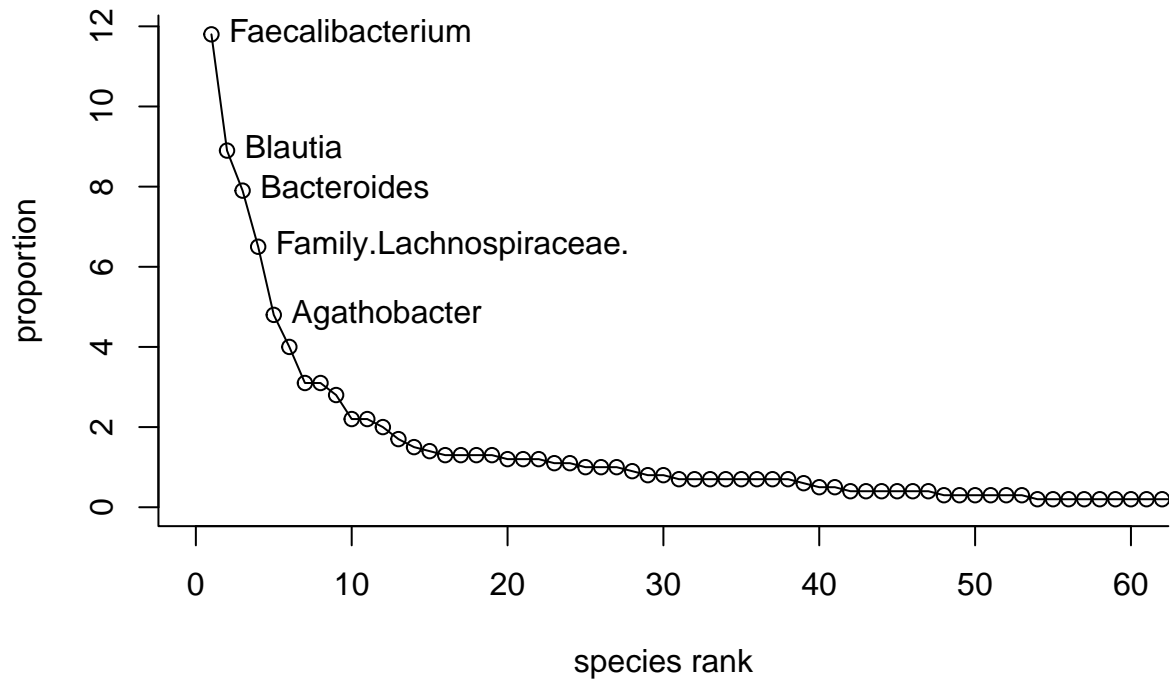



# T1D

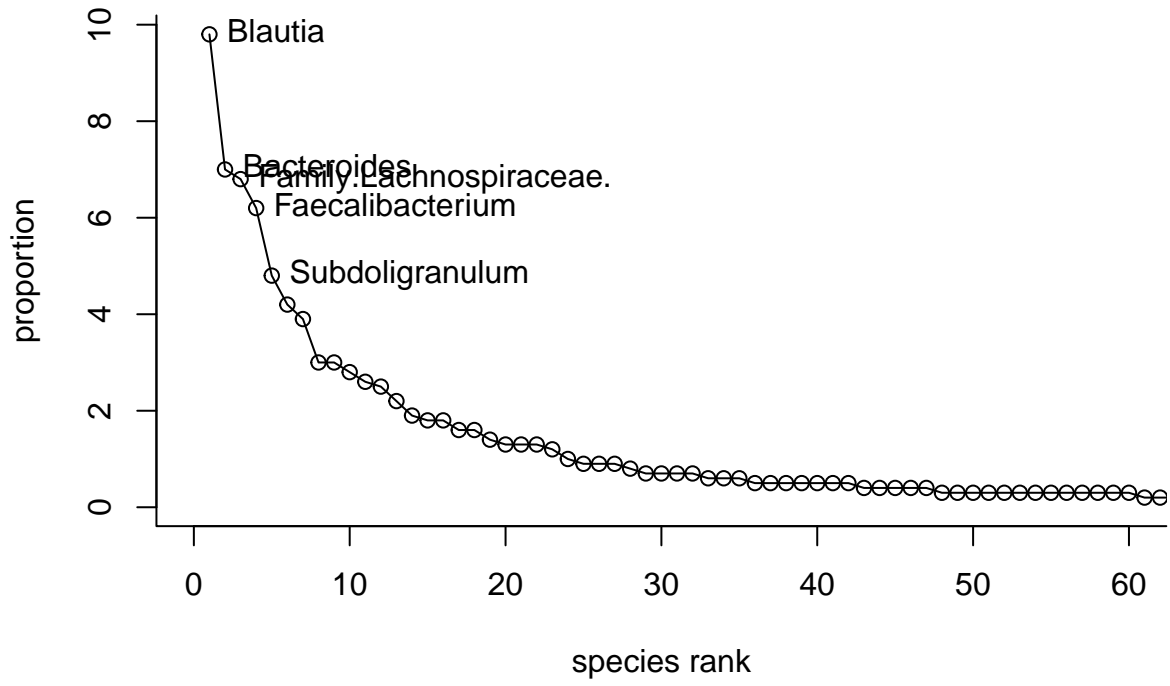

# LADA

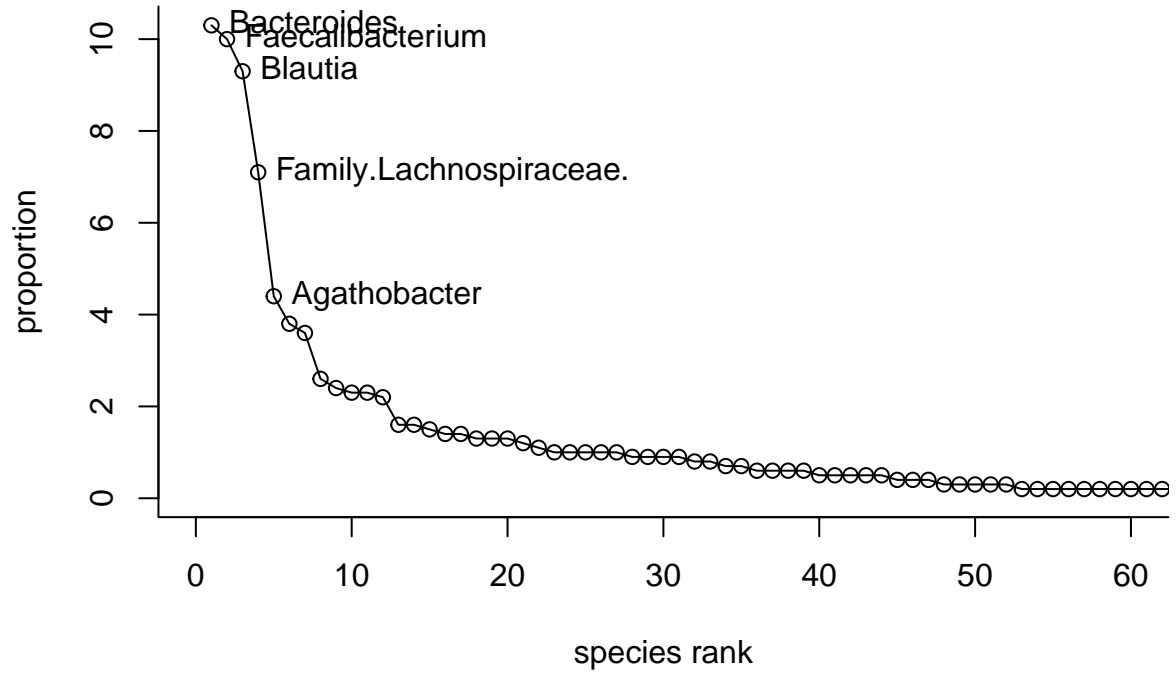

## T2D

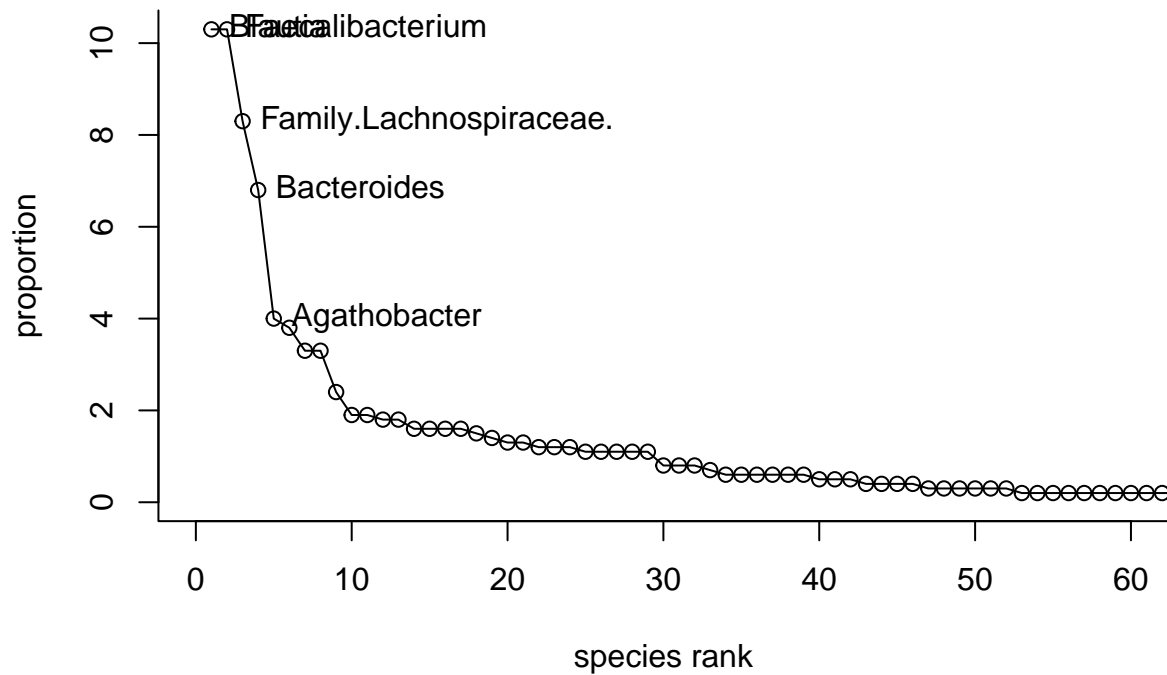

### *#Additional metadata*

```
MetadataEkstra <- read.csv(file="P:/CBMR/LADA/Text/Analysis/LADA_microbiome_extra_metadata.txt",
                           check.names=FALSE,
                           stringsAsFactors = FALSE,
                           strip.white=TRUE,
                           dec=".")
```

```
MetadataEkstra$MicrobiomeID <- paste("L", MetadataEkstra$MicrobiomeID,
                                     sep="")
```

### *#Remove metformin*

```
MetadataEkstra$Metformin <- ifelse(is.na(MetadataEkstra$Metformin), "Unknown", MetadataEkstra$Metformin)
```

```
MetadataEkstra <- filter(MetadataEkstra, !Metformin == 1)
```

### *#Merge with previous metadata*

```
covariates <- merge(covariates, MetadataEkstra[,c(1,12:length(MetadataEkstra))])
```

### *#Aggregate diagnosis mean and sd*

```
aggregate(covariates[, c(2:3, 12:length(covariates))], list(covariates$Diagnosis), mean,
          na.rm=TRUE)
```

```
##   Group.1   age    BMI    BMIq  CellNorm seq_depth   waist   hip
## 1 Control 61.44243 26.67011 2.042857 20384275367 135669.1 92.89714 101.4143
## 2   T1D 51.73196 26.66011 2.066667 18731782275 150154.5 98.30000 106.1833
## 3   LADA 66.61670 28.20713 2.416667 15590817082 134002.0 97.41667 105.7500
## 4   T2D 63.68304 31.49826 3.130435 16982538343 134876.8 109.14286 109.8571
```

```
##      whr      sbp      dbp hba1c_pct hba1c_mmol_mol      glu      chol
## 1 0.9160348 135.7643 81.03571 5.674286      38.47143 5.765714 5.444286
## 2 0.9241084 137.3500 75.98333 8.853333      73.26073 9.740000 4.860000
## 3 0.9171111 135.3056 75.30556 8.646477      71.00000 10.050000 4.258333
## 4 0.9917660 137.9318 80.43182 6.882609      51.72268 7.795652 5.113043
##      hdl      ldl      trig
## 1 1.369286 3.470000 1.344857
## 2 1.406333 2.703448 1.364333
## 3 1.441667 2.358333 1.203333
## 4 1.306957 3.040909 1.770870
```

```
aggregate(covariates[, c(2:3, 12:length(covariates))], list(covariates$Diagnosis), sd,
          na.rm=TRUE)
```

```
##  Group.1      age      BMI      BMIq  CellNorm seq_depth      waist      hip
## 1 Control 10.189143 3.722805 0.9696214 6781846681 25597.96 10.80459 7.671692
## 2   T1D 6.961407 4.555865 1.2015316 5712095609 27690.10 12.71206 7.790891
## 3   LADA 12.720776 5.022780 1.2401124 4604942130 17894.55 16.89787 9.196096
## 4   T2D 8.549262 5.608501 1.0137396 4888235680 22974.66 15.22592 9.323549
##      whr      sbp      dbp hba1c_pct hba1c_mmol_mol      glu      chol
## 1 0.08380676 18.33301 10.241052 0.3561817      3.907338 0.4845095 1.1265744
## 2 0.08055011 21.20026 10.346150 0.8076075      8.826342 4.2322734 1.3247251
## 3 0.11090078 27.12316 7.624334 1.4023922      15.326744 3.5783440 0.8743396
## 4 0.09003109 15.77317 9.861295 1.2730251      13.912891 2.7111685 1.3548916
##      hdl      ldl      trig
## 1 0.3772260 1.0489954 0.8167996
## 2 0.4137422 0.7248068 0.9030855
## 3 0.4074942 0.8328029 0.5037375
## 4 0.3891300 1.1537348 1.0565162
```

```
#Aggregate sex mean and sd
```

```
aggregate(covariates[, c(2:3, 12:length(covariates))], list(covariates$sex), mean,
          na.rm=TRUE)
```

```
##  Group.1      age      BMI      BMIq  CellNorm seq_depth      waist      hip
## 1      1 58.85014 27.72057 2.243590 19682450132 135967.7 100.02949 102.8718
## 2      2 61.87243 27.49916 2.298246 18093154746 142213.7 92.91818 106.1182
##      whr      sbp      dbp hba1c_pct hba1c_mmol_mol      glu      chol
## 1 0.9703762 136.8226 81.09615 6.773460      50.53729 7.182051 5.023077
## 2 0.8725230 135.8929 76.77976 6.956629      52.46553 7.640351 5.329825
##      hdl      ldl      trig
## 1 1.260128 3.109091 1.481923
## 2 1.528246 3.162500 1.309649
```

```
aggregate(covariates[, c(2:3, 12:length(covariates))], list(covariates$sex), sd,
          na.rm=TRUE)
```

```
##  Group.1      age      BMI      BMIq  CellNorm seq_depth      waist      hip
## 1      1 10.64268 4.322535 1.118741 6322346025 24849.49 12.35226 7.233327
## 2      2 10.32174 5.224095 1.133341 6104790238 26366.18 14.57140 10.077002
##      whr      sbp      dbp hba1c_pct hba1c_mmol_mol      glu      chol
## 1 0.07398661 17.32918 9.446039 1.624815      17.76417 2.929995 1.109689
```

```
## 2 0.07895551 21.95524 10.706984 1.561148 17.10433 3.298477 1.385507
## hdl ldl trig
## 1 0.3359943 1.054088 0.8860859
## 2 0.4024883 1.064905 0.8395066
```

```
#Test differences
df<-data.frame()
for (i in c(2:3, 12:length(covariates))) {
  design<-paste(colnames(covariates[i]), "~ Diagnosis")
  #Run kruskal-wallis test
  kwoject<-kruskal.test(formula(design), data=covariates)
  #print(kwoject)
  #Run follow up mann-whitney
  mwobject<-pairwise.wilcox.test(covariates[,i], covariates[,8],
                                p.adjust.method="bonferroni")
  #print(mwobject)
  #Bind all test
  df<-rbind(df, data.frame(kwoject$data.name, kwoject$statistic, kwoject$p.value,
                          mwobject$p.value[1,1], mwobject$p.value[2,1], mwobject$p.value[3,1],
                          mwobject$p.value[2,2], mwobject$p.value[3,2], mwobject$p.value[3,3]))
}

colnames(df)<-c("Design", "chistat", "kw p-value (p)", "mw p control vs T1D",
               "mw p control vs LADA", "mw p control vs T2D", "mw p T1D vs LADA",
               "mw p-value T1D vs T2D", "mw p-value LADA vs T2D")
kable(df[, 1:5], row.names=FALSE)
```

| Design                      | chistat    | kw p-value (p) | mw p control vs T1D | mw p control vs LADA |
|-----------------------------|------------|----------------|---------------------|----------------------|
| age by Diagnosis            | 30.8807870 | 0.0000009      | 0.0000109           | 0.7983155            |
| BMI by Diagnosis            | 16.5253521 | 0.0008847      | 1.0000000           | 1.0000000            |
| BMIq by Diagnosis           | 16.6786850 | 0.0008228      | 1.0000000           | 1.0000000            |
| CellNorm by Diagnosis       | 9.1304607  | 0.0276057      | 1.0000000           | 0.0929905            |
| seq_depth by Diagnosis      | 7.8999374  | 0.0481256      | 0.0514030           | 1.0000000            |
| waist by Diagnosis          | 17.8198774 | 0.0004791      | 0.5295941           | 1.0000000            |
| hip by Diagnosis            | 18.6119098 | 0.0003289      | 0.0206165           | 0.7844861            |
| whr by Diagnosis            | 9.3836893  | 0.0246015      | 1.0000000           | 1.0000000            |
| sbp by Diagnosis            | 0.5651568  | 0.9043605      | 1.0000000           | 1.0000000            |
| dbp by Diagnosis            | 7.4063630  | 0.0600138      | 0.1759817           | 0.2760244            |
| hba1c_pct by Diagnosis      | 98.4356210 | 0.0000000      | 0.0000000           | 0.0000002            |
| hba1c_mmol_mol by Diagnosis | 98.3646295 | 0.0000000      | 0.0000000           | 0.0000002            |
| glu by Diagnosis            | 52.7694420 | 0.0000000      | 0.0000018           | 0.0000338            |
| chol by Diagnosis           | 17.6586322 | 0.0005172      | 0.0137855           | 0.0012148            |
| hdl by Diagnosis            | 1.5100365  | 0.6799559      | 1.0000000           | 1.0000000            |
| ldl by Diagnosis            | 18.9521978 | 0.0002797      | 0.0011958           | 0.0060282            |
| trig by Diagnosis           | 5.8578350  | 0.1187355      | 1.0000000           | 1.0000000            |

```
kable(df[, c(1, 6:9)], row.names=FALSE)
```

| Design                      | mw p control vs T2D | mw p T1D vs LADA | mw p-value T1D vs T2D | mw p-value LADA vs T2D |
|-----------------------------|---------------------|------------------|-----------------------|------------------------|
| age by Diagnosis            | 1.0000000           | 0.0005720        | 0.0000078             | 1.0000000              |
| BMI by Diagnosis            | 0.0005874           | 1.0000000        | 0.0050354             | 0.6886029              |
| BMIq by Diagnosis           | 0.0003140           | 1.0000000        | 0.0121791             | 0.5623014              |
| CellNorm by Diagnosis       | 0.1808303           | 0.6998477        | 1.0000000             | 1.0000000              |
| seq_depth by Diagnosis      | 1.0000000           | 0.4065423        | 0.2928497             | 1.0000000              |
| waist by Diagnosis          | 0.0001944           | 1.0000000        | 0.1050003             | 0.7471481              |
| hip by Diagnosis            | 0.0011702           | 1.0000000        | 1.0000000             | 1.0000000              |
| whr by Diagnosis            | 0.0164348           | 1.0000000        | 0.0927908             | 0.5107970              |
| sbp by Diagnosis            | 1.0000000           | 1.0000000        | 1.0000000             | 1.0000000              |
| dbp by Diagnosis            | 1.0000000           | 1.0000000        | 0.7308104             | 1.0000000              |
| hba1c_pct by Diagnosis      | 0.0000000           | 1.0000000        | 0.0000376             | 0.0046811              |
| hba1c_mmol_mol by Diagnosis | 0.0000000           | 1.0000000        | 0.0000376             | 0.0046811              |
| glu by Diagnosis            | 0.0000006           | 1.0000000        | 0.1712058             | 0.3220620              |
| chol by Diagnosis           | 1.0000000           | 0.2505788        | 1.0000000             | 0.8339288              |
| hdl by Diagnosis            | 1.0000000           | 1.0000000        | 1.0000000             | 1.0000000              |
| ldl by Diagnosis            | 1.0000000           | 1.0000000        | 1.0000000             | 0.6979424              |
| trig by Diagnosis           | 0.1357372           | 1.0000000        | 0.3643004             | 0.4408450              |

```
#Diagnostic criteria
```

```
T1D<-filter(covariates, Diagnosis=="T1D")
range(T1D$hba1c_pct)
```

```
## [1] 7.6 11.0
```

```
Controls<-filter(covariates, Diagnosis=="Control")
range(Controls$glu)
```

```
## [1] 4.2 6.8
```

```
range(Controls$hba1c_pct)
```

```
## [1] 4.8 6.2
```

## Alpha diversity

Part of figure 1

```
rm(list=setdiff(ls(), c("Metadata", "MetadataMed", "Feature", "TaxonomyDA", "Taxonomy")))
```

```
#Calculate alpha diversity stats
```

```
#Use vegan to calculate various diversity and richness indices for each sample
```

```
set.seed(1)
```

```
diversityCalc <- data.frame(Shannon=diversity(t(Taxonomy), index="shannon"),
                           Simpson=diversity(t(Taxonomy), index="simpson"),
                           invSimpson=diversity(t(Taxonomy), index="invsimpson"),
                           fisher=fisher.alpha(t(Taxonomy)),
                           richness=specnumber(t(Taxonomy)),
```

```

rarefy_min_count=rarefy(t(Taxonomy),
                        sample=min(rowSums(t(Taxonomy)))),
chao1=estimateR(t(Taxonomy))["S.chao1",],
chao1SE=estimateR(t(Taxonomy))["se.chao1",],
ShannonRar=diversity(rrarefy(data.frame(t(Taxonomy)),
                              min(rowSums(t(Taxonomy)))),
                    index="shannon"),
SimpsonRar=diversity(rrarefy(data.frame(t(Taxonomy)),
                              min(rowSums(t(Taxonomy)))),
                    index="simpson"),
invSimpsonRar=diversity(rrarefy(data.frame(t(Taxonomy)),
                              min(rowSums(t(Taxonomy)))),
                    index="invsimpson"),
Pielou=diversity(t(Taxonomy))/log(specnumber(t(Taxonomy)))

#Merge with metadata.
diversityCalc<-add_rownames(diversityCalc, "MicrobiomeID")
Metadata2 <- merge(Metadata, diversityCalc, by="MicrobiomeID")

#Create a list to hold the plot objects.
Fig1List <- list()
#Create vector to loop
AlphaDiv<-c("fisher", "Shannon", "Simpson", "invSimpson", "richness", "chao1",
            "ShannonRar", "SimpsonRar", "invSimpsonRar", "Pielou")

#Plot
for (i in AlphaDiv) {
#Create plot name
pltName <- paste('Alpha', i, sep = '')
#create boxplots
Fig1List[[ pltName ]]<-
ggplot(Metadata2, aes_string(x="Diagnosis", y=i, group="Diagnosis")) +
  geom_violin(aes(fill=Diagnosis, trim=FALSE)) +
  stat_summary(fun.data="mean_sdl",
              mult=1, #mean plus minus a constant (mult=1) times the st.dev
              geom="pointrange",
              width=0.2 ) +
  #stat_summary(fun.y = mean, geom = "point") +
  #facet_grid(. ~ Metformin, scales="fixed") + #Scales can also be "free"
  #ggtitle(paste("Genus", i, sep=" ")) +
  #xlab("Diagnosis") +
  ylab(paste(i)) +
  scale_fill_manual(values=c(Control = "#666666", T1D = "#1F78B4",
                             T2D = "#33A02C", LADA = "#E31A1C")) +
  theme_bw() +
  theme(legend.position="none", panel.grid.major = element_blank(),
        panel.grid.minor = element_blank(), axis.title=element_text(size=20),
        axis.title.x = element_blank(),
        axis.text.x = element_text(angle = 45, hjust = 1, size=16),
        axis.text.y = element_text(angle = 45, hjust = 1, size=12))
}

#Have the plots stored in lists
lay <- rbind(c(1,2,3))

```

```
pdf(paste("MicroLADA_Alpha", ".pdf", sep=""), width=12, height=6)
grid.arrange(Fig1List$Alpharichness,
             Fig1List$AlphaPielou, Fig1List$AlphaShannon, layout_matrix = lay)
dev.off()
```

```
## pdf
## 2
```

```
grid.arrange(Fig1List$Alpharichness,
             Fig1List$AlphaPielou, Fig1List$AlphaShannon, layout_matrix = lay)
```

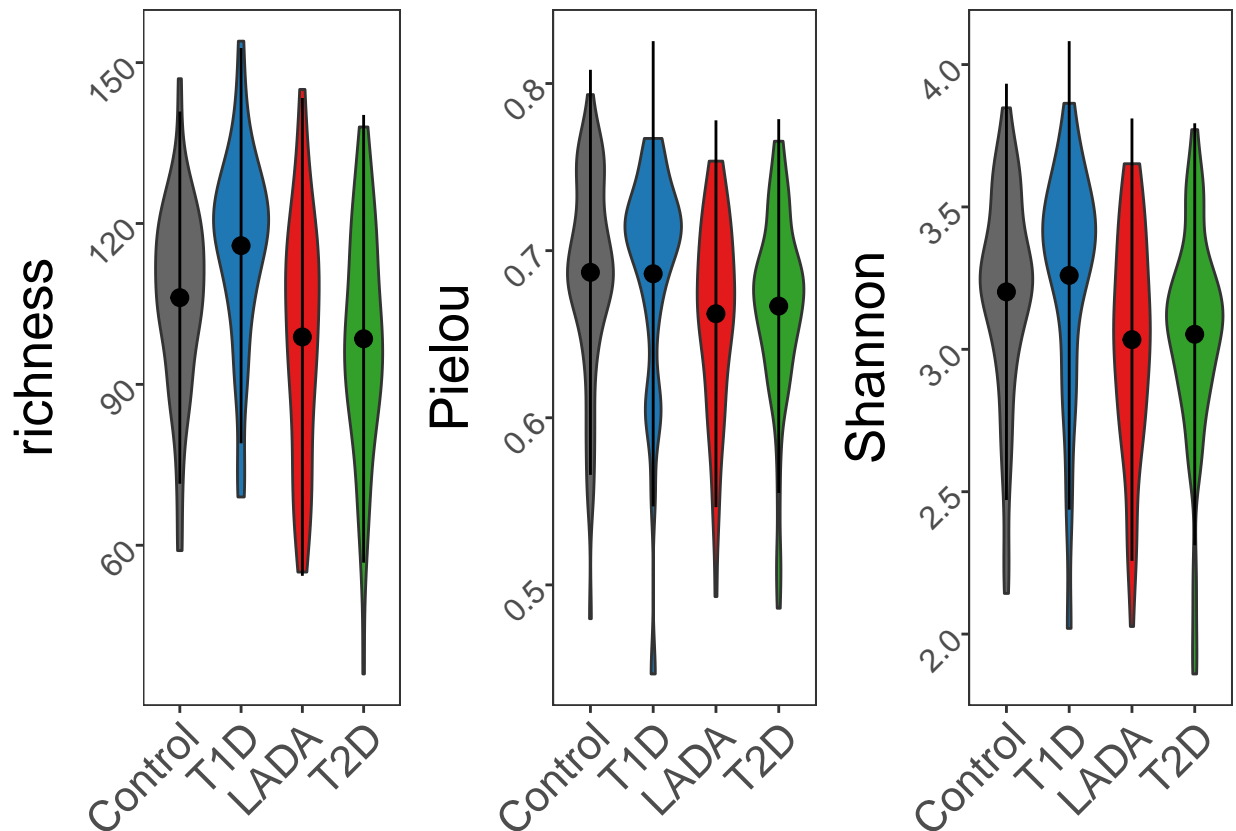

```
#Kruskal test
kruskal.test(richness ~ Diagnosis, data=Metadata2)
```

```
##
## Kruskal-Wallis rank sum test
##
## data: richness by Diagnosis
## Kruskal-Wallis chi-squared = 19.779, df = 3, p-value = 0.0001886
```

```
kruskal.test(Pielou ~ Diagnosis, data=Metadata2)
```

```
##
```



```
## Kruskal-Wallis rank sum test
##
## data: Pielou by Diagnosis
## Kruskal-Wallis chi-squared = 12.261, df = 3, p-value = 0.006541
```

```
kruskal.test(Shannon ~ Diagnosis, data=Metadata2)
```

```
##
## Kruskal-Wallis rank sum test
##
## data: Shannon by Diagnosis
## Kruskal-Wallis chi-squared = 16.588, df = 3, p-value = 0.000859
```

```
#If significant Mann-Whitney pairwise post-test
pairwise.wilcox.test(Metadata2$richness, Metadata2$Diagnosis,
                     p.adjust.method="bonferroni")
```

```
##
## Pairwise comparisons using Wilcoxon rank sum test with continuity correction
##
## data: Metadata2$richness and Metadata2$Diagnosis
##
##      Control T1D    LADA
## T1D  0.0345 -      -
## LADA 0.3275 0.0024 -
## T2D  0.1161 0.0010 1.0000
##
## P value adjustment method: bonferroni
```

```
pairwise.wilcox.test(Metadata2$Pielou, Metadata2$Diagnosis,
                     p.adjust.method="bonferroni")
```

```
##
## Pairwise comparisons using Wilcoxon rank sum test with continuity correction
##
## data: Metadata2$Pielou and Metadata2$Diagnosis
##
##      Control T1D    LADA
## T1D  1.000 -      -
## LADA 0.065 0.085 -
## T2D  0.091 0.127 1.000
##
## P value adjustment method: bonferroni
```

```
pairwise.wilcox.test(Metadata2$Shannon, Metadata2$Diagnosis,
                     p.adjust.method="bonferroni")
```

```
##
## Pairwise comparisons using Wilcoxon rank sum test with continuity correction
##
## data: Metadata2$Shannon and Metadata2$Diagnosis
```

```
##
##      Control T1D   LADA
## T1D  1.000   -     -
## LADA 0.066   0.030 -
## T2D  0.019   0.018 1.000
##
## P value adjustment method: bonferroni
```

## Alpha diversity remove metformin

```
rm(list=setdiff(ls(), c("Metadata", "MetadataMed", "Feature", "TaxonomyDA", "Taxonomy"
, "Fig1List")))
##Removing treated with metformin
#Metadata$Metformin <- ifelse(is.na(Metadata$Metformin), "Unknown", Metadata$Metformin)
Metadata2<-filter(Metadata, !Metformin == 1)
##Applying subsetting to OTU tables
Taxonomy2<-dplyr::select(Taxonomy, one_of(as.character(Metadata2$MicrobiomeID)))
##Remove orgs that are not present after subsetting.
Taxonomy2 <- Taxonomy2[rowSums(Taxonomy2)>0,]

#Calculate alpha diversity stats
#Use vegan to calculate various diversity and richness indices for each sample
set.seed(1)
diversityCalc <- data.frame(Shannon=diversity(t(Taxonomy2), index="shannon"),
Simpson=diversity(t(Taxonomy2), index="simpson"),
invSimpson=diversity(t(Taxonomy2), index="invsimpson"),
fisher=fisher.alpha(t(Taxonomy2)),
richness=specnumber(t(Taxonomy2)),
rarefy_min_count=rarefy(t(Taxonomy2),
sample=min(rowSums(t(Taxonomy2))))),
chao1=estimateR(t(Taxonomy2))["S.chao1",],
chao1SE=estimateR(t(Taxonomy2))["se.chao1",],
ShannonRar=diversity(rrarefy(data.frame(t(Taxonomy2)),
min(rowSums(t(Taxonomy2))))),
index="shannon"),
SimpsonRar=diversity(rrarefy(data.frame(t(Taxonomy2)),
min(rowSums(t(Taxonomy2))))),
index="simpson"),
invSimpsonRar=diversity(rrarefy(data.frame(t(Taxonomy2)),
min(rowSums(t(Taxonomy2))))),
index="invsimpson"),
Pielou=diversity(t(Taxonomy2))/log(specnumber(t(Taxonomy2))))

#Merge with metadata.
diversityCalc<-add_rownames(diversityCalc, "MicrobiomeID")
Metadata2 <- merge(Metadata2, diversityCalc, by="MicrobiomeID")

#Create a list to hold the plot objects.
Fig1ListRemMet <- list()
#Create vector to loop
AlphaDiv<-c("fisher", "Shannon", "Simpson", "invSimpson", "richness", "chao1",
"ShannonRar", "SimpsonRar", "invSimpsonRar", "Pielou")
```

```

#Plot
for (i in AlphaDiv) {
#Create plot name
pltName <- paste('Alpha', i, sep = '')
#create boxplots
Fig1ListRemMet[[ pltName ]]<-
ggplot(Metadata2, aes_string(x="Diagnosis", y=i, group="Diagnosis")) +
  geom_violin(aes(fill=Diagnosis, trim=FALSE)) +
  stat_summary(fun.data="mean_sdl",
               mult=1, #mean plus minus a constant (mult=1) times the st.dev
               geom="pointrange",
               width=0.2 ) +
  #stat_summary(fun.y = mean, geom = "point") +
  #facet_grid(. ~ Metformin, scales="fixed") + #Scales can also be "free"
  #ggtitle(paste("Genus", i, sep=" ")) +
  #xlab("Diagnosis") +
  ylab(paste(i)) +
  scale_fill_manual(values=c(Control = "#666666", T1D = "#1F78B4",
                             T2D = "#33A02C", LADA = "#E31A1C")) +
  theme_bw() +
  theme(legend.position="none", panel.grid.major = element_blank(),
        panel.grid.minor = element_blank(), axis.title=element_text(size=20),
        axis.title.x = element_blank(),
        axis.text.x = element_text(angle = 45, hjust = 1, size=16),
        axis.text.y = element_text(angle = 45, hjust = 1, size=12))
}

#Have the plots stored in lists
lay <- rbind(c(1,2,3))
pdf(paste("MicroLADA_Alpha_RemMet", ".pdf", sep=""), width=12, height=6)
grid.arrange(Fig1ListRemMet$Alpharichness,
              Fig1ListRemMet$AlphaPielou,
              Fig1ListRemMet$AlphaShannon, layout_matrix = lay)
dev.off()

```

```

## pdf
## 2

```

```

grid.arrange(Fig1ListRemMet$Alpharichness,
              Fig1ListRemMet$AlphaPielou,
              Fig1ListRemMet$AlphaShannon, layout_matrix = lay)

```

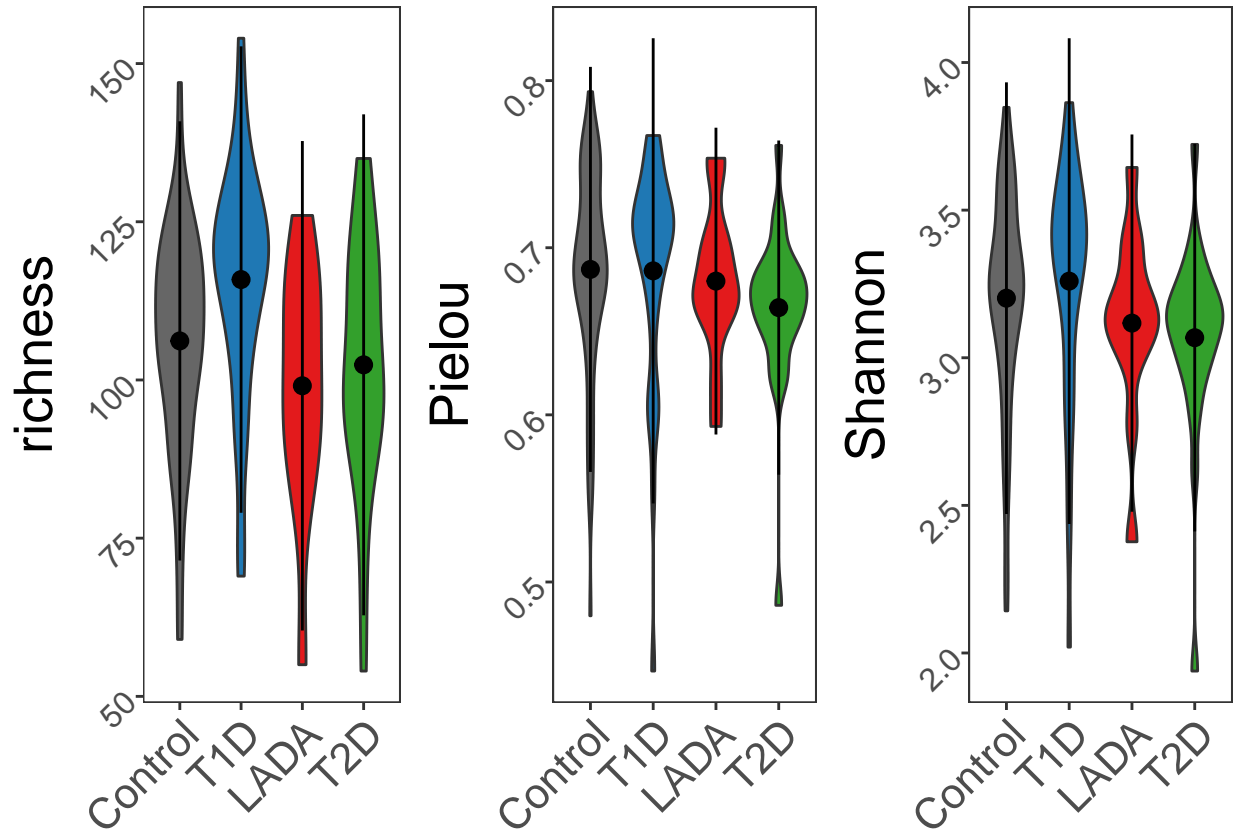

```
#Kruskal test
```

```
kruskal.test(richness ~ Diagnosis, data=Metadata2)
```

```
##
## Kruskal-Wallis rank sum test
##
## data: richness by Diagnosis
## Kruskal-Wallis chi-squared = 11.736, df = 3, p-value = 0.008344
```

```
kruskal.test(Pielou ~ Diagnosis, data=Metadata2)
```

```
##
## Kruskal-Wallis rank sum test
##
## data: Pielou by Diagnosis
## Kruskal-Wallis chi-squared = 7.2492, df = 3, p-value = 0.06437
```

```
kruskal.test(Shannon ~ Diagnosis, data=Metadata2)
```

```
##
## Kruskal-Wallis rank sum test
##
## data: Shannon by Diagnosis
## Kruskal-Wallis chi-squared = 9.3625, df = 3, p-value = 0.02484
```

```
#If significant Mann-Whitney pairwise post-test
pairwise.wilcox.test(Metadata2$richness, Metadata2$Diagnosis,
                     p.adjust.method="bonferroni")
```

```
##
## Pairwise comparisons using Wilcoxon rank sum test with continuity correction
##
## data: Metadata2$richness and Metadata2$Diagnosis
##
##      Control T1D  LADA
## T1D  0.034    -    -
## LADA 1.000    0.057 -
## T2D  1.000    0.079 1.000
##
## P value adjustment method: bonferroni
```

```
pairwise.wilcox.test(Metadata2$Pielou, Metadata2$Diagnosis,
                     p.adjust.method="bonferroni")
```

```
##
## Pairwise comparisons using Wilcoxon rank sum test with continuity correction
##
## data: Metadata2$Pielou and Metadata2$Diagnosis
##
##      Control T1D  LADA
## T1D  1.000    -    -
## LADA 1.000    1.000 -
## T2D  0.147    0.094 1.000
##
## P value adjustment method: bonferroni
```

```
pairwise.wilcox.test(Metadata2$Shannon, Metadata2$Diagnosis,
                     p.adjust.method="bonferroni")
```

```
##
## Pairwise comparisons using Wilcoxon rank sum test with continuity correction
##
## data: Metadata2$Shannon and Metadata2$Diagnosis
##
##      Control T1D  LADA
## T1D  1.000    -    -
## LADA 1.000    0.433 -
## T2D  0.169    0.037 1.000
##
## P value adjustment method: bonferroni
```

## Violin plots Dissimilarities

Part of figure 1

```

rm(list=setdiff(ls(), c("Metadata", "MetadataMed", "Feature", "TaxonomyDA", "Taxonomy",
                        "Fig1List", "Fig1ListRemMet")))

##Create long format of dissimilarities
#Multi dimensional scaling
dismatrix <- vegdist(decostand(t(Taxonomy), method="hellinger"), method="bray")

#Contains all values except the ones equal to 0
meltPwBC<-subset(melt(as.matrix(dismatrix)))
rm(dismatrix) #Have comparisons of both 1vs2 and 2vs1 ..., but are removed during the
              #following filtration.
              #The same applies to comparisons of the same sample with itself

LADA_V <- subset(Metadata, Diagnosis=="LADA") %>% dplyr::select(one_of("MicrobiomeID")) %>%
  pull(MicrobiomeID) #>% droplevels()
T1D_V <- subset(Metadata, Diagnosis=="T1D") %>% dplyr::select(one_of("MicrobiomeID")) %>%
  pull(MicrobiomeID) #>% droplevels()
T2D_V <- subset(Metadata, Diagnosis=="T2D") %>% dplyr::select(one_of("MicrobiomeID")) %>%
  pull(MicrobiomeID) #>% droplevels()
Control_V <- subset(Metadata, Diagnosis=="Control") %>% dplyr::select(one_of("MicrobiomeID")) %>%
  pull(MicrobiomeID) #>% droplevels()

meltPwBC$Compare <- ifelse (meltPwBC$Var1 %in% LADA_V & meltPwBC$Var2 %in% T1D_V,
                          "LADA vs T1D",
                          ifelse (meltPwBC$Var1 %in% LADA_V & meltPwBC$Var2 %in% T2D_V,
                                  "LADA vs T2D",
                                  ifelse (meltPwBC$Var1 %in% LADA_V & meltPwBC$Var2 %in% Control_V,
                                          "LADA vs Control",
                                          ifelse (meltPwBC$Var1 %in% T1D_V & meltPwBC$Var2 %in% T2D_V,
                                                  "T1D vs T2D",
                                                  ifelse (meltPwBC$Var1 %in% T1D_V & meltPwBC$Var2 %in% Control_V,
                                                          "T1D vs Control",
                                                          ifelse (meltPwBC$Var1 %in% T2D_V & meltPwBC$Var2 %in% Control_V,
                                                                  "T2D vs Control", "hmmmmmm"))))))))

##Control validation
#table((meltPwBC$Var1 %in% LADA_V) & (meltPwBC$Var2 %in% T1D_V))
#table(meltPwBC$Compare)

meltPwBC<-subset(meltPwBC, meltPwBC$Compare!="hmmmmmm")

#Defining the order, can change if needed
meltPwBC$Compare<-factor(meltPwBC$Compare,
                        levels= c("LADA vs T1D", "LADA vs T2D", "LADA vs Control",
                                  "T1D vs T2D", "T1D vs Control", "T2D vs Control"))

violinDissi<-ggplot(meltPwBC, aes(x=Compare, y=value)) +
  geom_violin(trim=FALSE, fill="purple", colour="purple") +
  stat_summary(fun.data="mean_sdl", mult=1, #mean ± a constant (mult=1) times the st.dev
              geom="pointrange", width=0.2 ) +
  #geom_dotplot(binaxis='y', stackdir='center', dotsize=0.01) +
  labs(x="", y="Dissimilarity") +
  theme_bw() +

```

```
theme(legend.position="none", panel.grid.major = element_blank(),
      panel.grid.minor = element_blank())
```

```
violinDissi
```

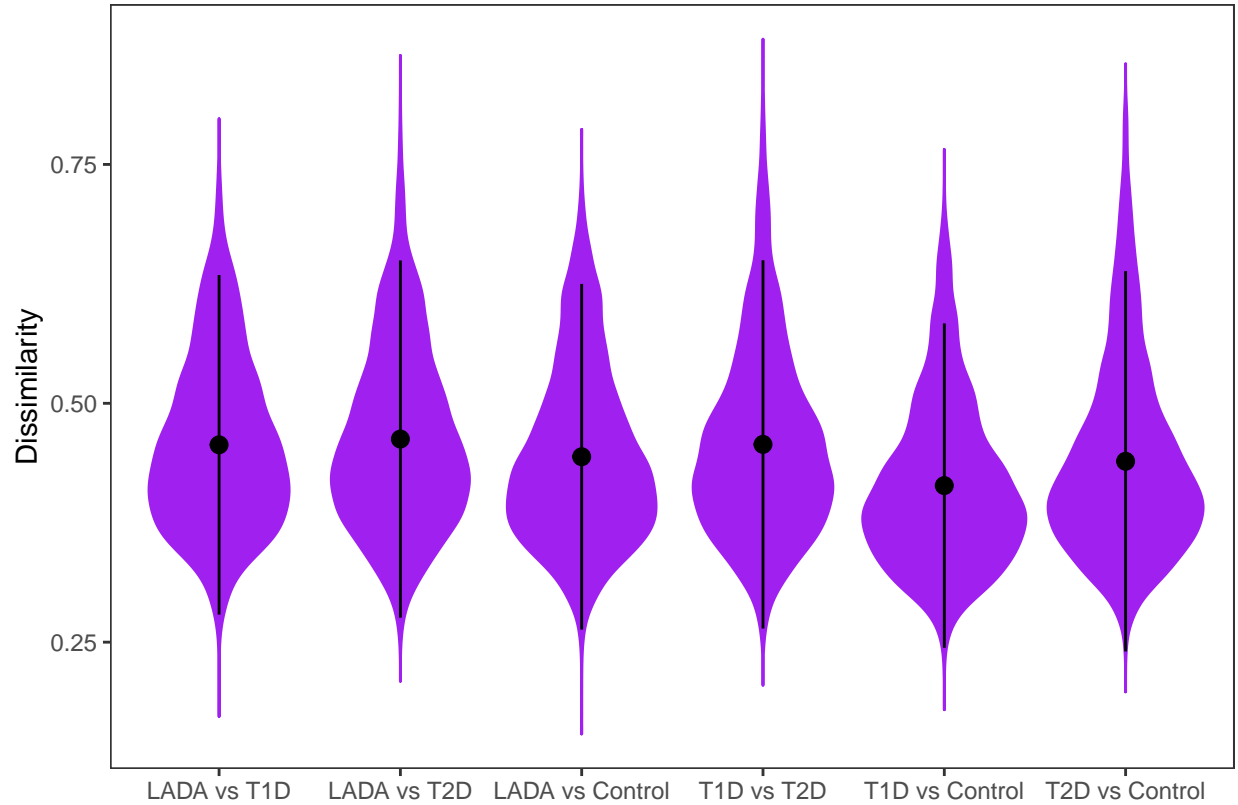

```
pdf(paste("MicroLADA_ViolinDissi", ".pdf", sep=""), width=12, height=6)
violinDissi
dev.off()
```

```
## pdf
## 2
```

```
#Kruskal test
kruskal.test(value ~ Compare, data=meltPwBC)
```

```
##
## Kruskal-Wallis rank sum test
##
## data: value by Compare
## Kruskal-Wallis chi-squared = 540.07, df = 5, p-value < 2.2e-16
```

```
#If significant Mann-Whitney pairwise post-test
pairwise.wilcox.test(meltPwBC$value, meltPwBC$Compare, p.adjust.method="bonferroni")
```

```
##
## Pairwise comparisons using Wilcoxon rank sum test with continuity correction
##
## data: meltPwBC$value and meltPwBC$Compare
##
##           LADA vs T1D LADA vs T2D LADA vs Control T1D vs T2D
## LADA vs T2D    0.620      -          -          -
## LADA vs Control 7.2e-07    < 2e-16    -          -
## T1D vs T2D     1.000      0.058      1.5e-05    -
## T1D vs Control < 2e-16    < 2e-16    < 2e-16    < 2e-16
## T2D vs Control < 2e-16    < 2e-16    6.1e-05    < 2e-16
##
##           T1D vs Control
## LADA vs T2D    -
## LADA vs Control -
## T1D vs T2D     -
## T1D vs Control -
## T2D vs Control < 2e-16
##
## P value adjustment method: bonferroni
```

```
#####
##Create long format of dissimilarities
##Multi dimensional scaling
dismatrix <- vegdist(decostand(t(Taxonomy), method="hellinger"), method="bray")

#Contains all values except the ones equal to 0
meltPwBC<-subset(melt(as.matrix(dismatrix)), value!=0)
#meltPwBC<-subset(melt(as.matrix(dismatrix)))
rm(dismatrix) #Have comparisons of both 1vs2 and 2vs1 ..., but are removed during the
              #following filtration.
              #The same applies to comparisons of the same sample with itself

LADA_V <- subset(Metadata, Diagnosis=="LADA") %>% dplyr::select(one_of("MicrobiomeID")) %>%
  pull(MicrobiomeID) %>% droplevels()
T1D_V <- subset(Metadata, Diagnosis=="T1D") %>% dplyr::select(one_of("MicrobiomeID")) %>%
  pull(MicrobiomeID) %>% droplevels()
T2D_V <- subset(Metadata, Diagnosis=="T2D") %>% dplyr::select(one_of("MicrobiomeID")) %>%
  pull(MicrobiomeID) %>% droplevels()
Control_V <- subset(Metadata, Diagnosis=="Control") %>% dplyr::select(one_of("MicrobiomeID")) %>%
  pull(MicrobiomeID) %>% droplevels()

meltPwBC$Compare <- ifelse (meltPwBC$Var1 %in% LADA_V & meltPwBC$Var2 %in%
  LADA_V, "LADA",
  ifelse (meltPwBC$Var1 %in% T1D_V & meltPwBC$Var2 %in%
  T1D_V, "T1D",
  ifelse (meltPwBC$Var1 %in% T2D_V & meltPwBC$Var2 %in%
  T2D_V, "T2D",
  ifelse (meltPwBC$Var1 %in% Control_V & meltPwBC$Var2 %in%
  Control_V, "Control",
  ifelse (meltPwBC$Var1 %in% LADA_V & meltPwBC$Var2 %in%
  T1D_V, "LADA vs T1D",
```



```

        ifelse (meltPwBC$Var1 %in% LADA_V & meltPwBC$Var2 %in%
                T2D_V, "LADA vs T2D",
        ifelse (meltPwBC$Var1 %in% LADA_V & meltPwBC$Var2 %in%
                Control_V, "LADA vs Control",
        ifelse (meltPwBC$Var1 %in% T1D_V & meltPwBC$Var2 %in%
                T2D_V, "T1D vs T2D",
        ifelse (meltPwBC$Var1 %in% T1D_V & meltPwBC$Var2 %in%
                Control_V, "T1D vs Control",
        ifelse (meltPwBC$Var1 %in% T2D_V & meltPwBC$Var2 %in%
                Control_V, "T2D vs Control", "hmmmmmm"))))))))

##Control validation
#table((meltPwBC$Var1 %in% LADA_V) & (meltPwBC$Var2 %in% T1D_V))
#table(meltPwBC$Compare)

meltPwBC<-subset(meltPwBC, meltPwBC$Compare!="hmmmmmm")

#Defining the order, can change if needed
meltPwBC$Compare<-factor(meltPwBC$Compare, levels= c("Control", "T1D",
                                                    "T2D", "LADA",
                                                    "LADA vs T1D", "LADA vs T2D",
                                                    "LADA vs Control", "T1D vs T2D",
                                                    "T1D vs Control", "T2D vs Control"))

violinDissi<-ggplot(meltPwBC, aes(x=Compare, y=value)) +
  geom_violin(trim=FALSE, fill="purple", colour="purple") +
  stat_summary(fun.data="mean_sdl", mult=1, #mean ± a constant (mult=1) times the st.dev
              geom="pointrange", width=0.2 ) +
  #geom_dotplot(binaxis='y', stackdir='center', dotsize=0.01) +
  labs(x="", y="Dissimilarity") +
  theme_bw() +
  theme(legend.position="none", panel.grid.major = element_blank(),
        panel.grid.minor = element_blank(),
        axis.text.x = element_text(angle = 45, hjust = 1))

violinDissi

```

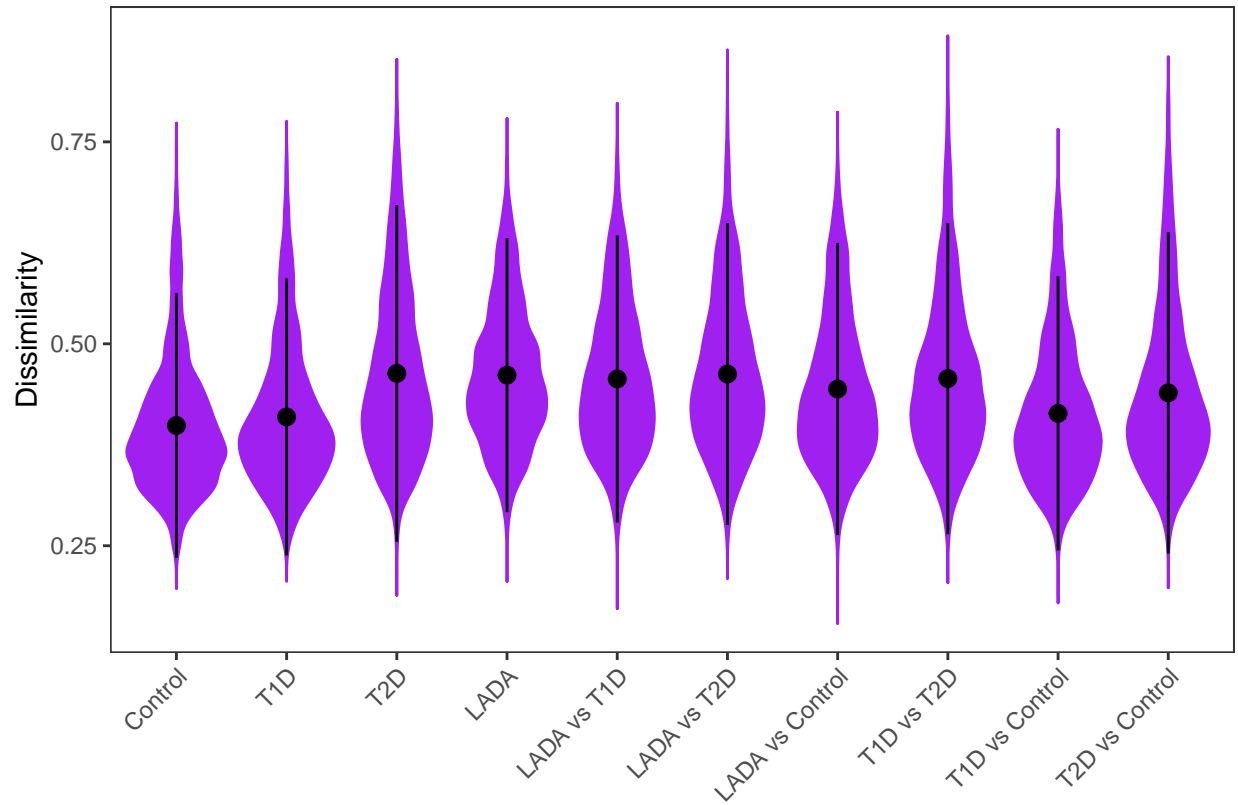

```
pdf(paste("MicroLADA_ViolinDissiAllComp", ".pdf", sep=""), width=12, height=6)
violinDissi
dev.off()
```

```
## pdf
## 2
```

```
#Kruskal test
kruskal.test(value ~ Compare, data=meltPwBC)
```

```
##
## Kruskal-Wallis rank sum test
##
## data: value by Compare
## Kruskal-Wallis chi-squared = 2259.9, df = 9, p-value < 2.2e-16
```

```
#If significant Mann-Whitney pairwise post-test
pairwise.wilcox.test(meltPwBC$value, meltPwBC$Compare, p.adjust.method="bonferroni")
```

```
##
## Pairwise comparisons using Wilcoxon rank sum test with continuity correction
##
## data: meltPwBC$value and meltPwBC$Compare
##
```

```

##           Control T1D      T2D      LADA      LADA vs T1D LADA vs T2D
## T1D       0.03991 -          -          -          -          -
## T2D       < 2e-16 < 2e-16 -          -          -          -
## LADA      < 2e-16 < 2e-16 1.00000 -          -          -
## LADA vs T1D < 2e-16 < 2e-16 1.00000 0.47498 -          -
## LADA vs T2D < 2e-16 < 2e-16 1.00000 1.00000 1.00000 -
## LADA vs Control < 2e-16 < 2e-16 1.1e-12 < 2e-16 2.2e-06 < 2e-16
## T1D vs T2D   < 2e-16 < 2e-16 1.00000 0.02330 1.00000 0.17316
## T1D vs Control 1.8e-11 1.00000 < 2e-16 < 2e-16 < 2e-16 < 2e-16
## T2D vs Control < 2e-16 9.2e-16 < 2e-16 < 2e-16 < 2e-16 < 2e-16
##           LADA vs Control T1D vs T2D T1D vs Control
## T1D       -                -                -
## T2D       -                -                -
## LADA      -                -                -
## LADA vs T1D -                -                -
## LADA vs T2D -                -                -
## LADA vs Control -                -                -
## T1D vs T2D 4.4e-05          -                -
## T1D vs Control < 2e-16          < 2e-16          -
## T2D vs Control 0.00018          3.8e-16          < 2e-16
##
## P value adjustment method: bonferroni

```

```

#####
meltPwBC<-filter(meltPwBC,
  Compare == "Control" | Compare == "T1D" |
  Compare == "T2D" | Compare == "LADA")

meltPwBC$Compare<-ordered(meltPwBC$Compare,
  levels=c("Control", "T1D", "LADA", "T2D"))

violinDisi<-ggplot(meltPwBC, aes(x=Compare, y=value)) +
  geom_violin(aes(fill=Compare, trim=FALSE)) +
  stat_summary(fun.data="mean_sdl", mult=1, #mean ± a constant (mult=1) times the st.dev
  geom="pointrange", width=0.2 ) +
  labs(y="Disimilarity") +
  scale_fill_manual(values=c(Control = "#666666", T1D = "#1F78B4",
  T2D = "#33A02C", LADA = "#E31A1C")) +
  theme_bw() +
  theme(legend.position="none", panel.grid.major = element_blank(),
  panel.grid.minor = element_blank(), axis.title=element_text(size=20),
  axis.title.x = element_blank(),
  axis.text.x = element_text(angle = 45, hjust = 1, size=16),
  axis.text.y = element_text(angle = 45, hjust = 1, size=12))

violinDisi

```

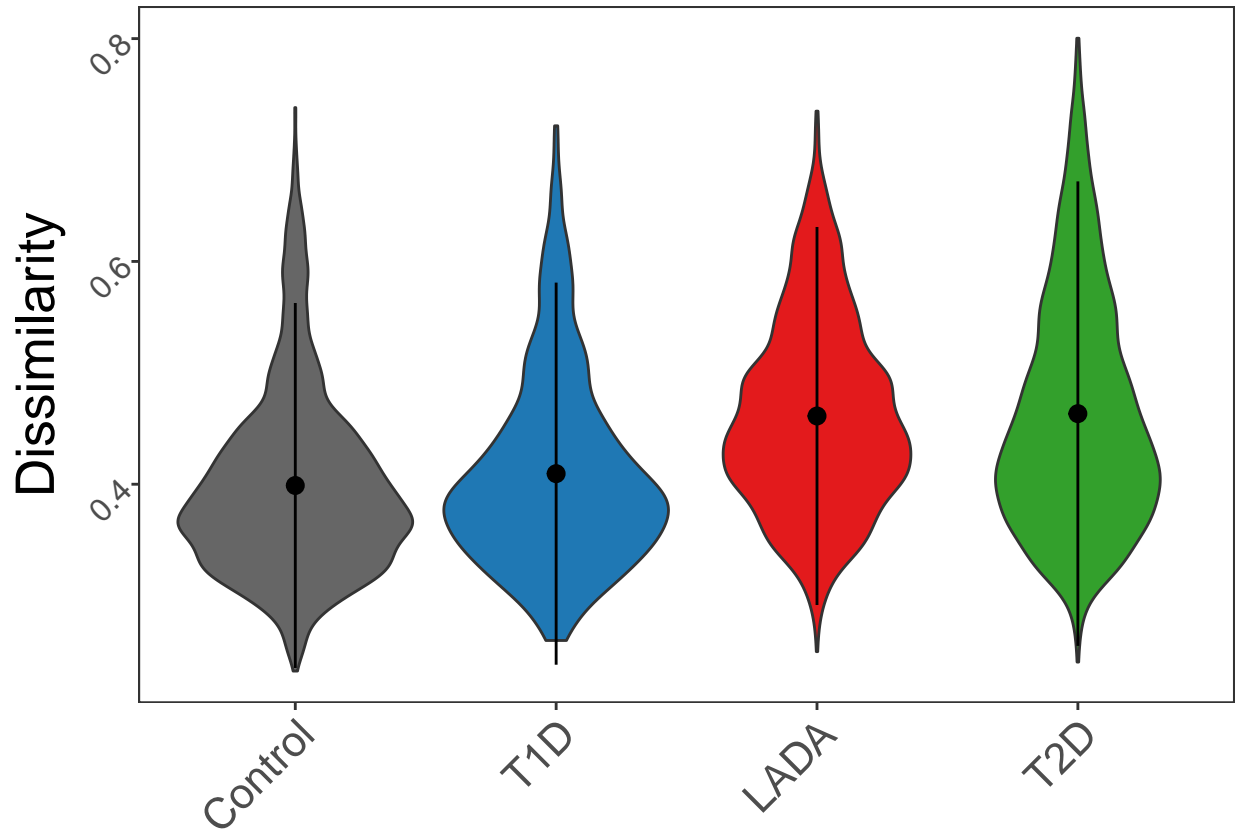

```
pdf(paste("MicroLADA_ViolinDissiCompWithin", ".pdf", sep=""), width=12, height=6)
violinDissi
dev.off()
```

```
## pdf
## 2
```

```
#Save plot i previous list
Fig1List[[ "DissiBrayHel" ]] <- violinDissi
```

```
#Kruskal test
kruskal.test(value ~ Compare, data=meltPwBC)
```

```
##
## Kruskal-Wallis rank sum test
##
## data: value by Compare
## Kruskal-Wallis chi-squared = 1601.5, df = 3, p-value < 2.2e-16
```

```
#If significant Mann-Whitney pairwise post-test
pairwise.wilcox.test(meltPwBC$value, meltPwBC$Compare, p.adjust.method="bonferroni")
```

```
##
## Pairwise comparisons using Wilcoxon rank sum test with continuity correction
```

```
##
## data: meltPwBC$value and meltPwBC$Compare
##
##      Control T1D      LADA
## T1D  0.0053  -        -
## LADA <2e-16 <2e-16  -
## T2D  <2e-16 <2e-16  0.1564
##
## P value adjustment method: bonferroni
```

## Violin plots Dissimilarities remove metformin

```
rm(list=setdiff(ls(), c("Metadata", "MetadataMed", "Feature", "TaxonomyDA", "Taxonomy",
                        "Fig1List", "Fig1ListRemMet")))
##Removing treated with metformin
#Metadata$Metformin <- ifelse(is.na(Metadata$Metformin), "Unknown", Metadata$Metformin)
Metadata2<-filter(Metadata, !Metformin == 1)
##Applying subsetting to OTU tables
Taxonomy2<-dplyr::select(Taxonomy, one_of(as.character(Metadata2$MicrobiomeID)))
##Remove orgs that are not present after subsetting.
Taxonomy2 <- Taxonomy2[rowSums(Taxonomy2)>0,]

##Create long format of dissimilarities
#Multi dimensional scaling
distmatrix <- vegdist(decostand(t(Taxonomy2), method="hellinger"), method="bray")

#Contains all values except the ones equal to 0
meltPwBC<-subset(melt(as.matrix(distmatrix)))
rm(distmatrix) #Have comparisons of both 1vs2 and 2vs1 ..., but are removed during the
               #following filtration.
               #The same applies to comparisons of the same sample with itself

LADA_V <- subset(Metadata2, Diagnosis=="LADA") %>% dplyr::select(one_of("MicrobiomeID")) %>%
  pull(MicrobiomeID) %>% droplevels()
T1D_V <- subset(Metadata2, Diagnosis=="T1D") %>% dplyr::select(one_of("MicrobiomeID")) %>%
  pull(MicrobiomeID) %>% droplevels()
T2D_V <- subset(Metadata2, Diagnosis=="T2D") %>% dplyr::select(one_of("MicrobiomeID")) %>%
  pull(MicrobiomeID) %>% droplevels()
Control_V <- subset(Metadata2, Diagnosis=="Control") %>% dplyr::select(one_of("MicrobiomeID")) %>%
  pull(MicrobiomeID) %>% droplevels()

meltPwBC$Compare <- ifelse (meltPwBC$Var1 %in% LADA_V & meltPwBC$Var2 %in% T1D_V,
                           "LADA vs T1D",
                           ifelse (meltPwBC$Var1 %in% LADA_V & meltPwBC$Var2 %in% T2D_V,
                                     "LADA vs T2D",
                                     ifelse (meltPwBC$Var1 %in% LADA_V & meltPwBC$Var2 %in% Control_V,
                                             "LADA vs Control",
                                             ifelse (meltPwBC$Var1 %in% T1D_V & meltPwBC$Var2 %in% T2D_V,
                                                     "T1D vs T2D",
                                                     "T1D vs Control"))))
```

```

        ifelse (meltPwBC$Var1 %in% T1D_V & meltPwBC$Var2 %in% Control_V,
                "T1D vs Control",
        ifelse (meltPwBC$Var1 %in% T2D_V & meltPwBC$Var2 %in% Control_V,
                "T2D vs Control", "hmmmmmm"))))))
##Control validation
#table((meltPwBC$Var1 %in% LADA_V) & (meltPwBC$Var2 %in% T1D_V))
#table(meltPwBC$Compare)

meltPwBC<-subset(meltPwBC, meltPwBC$Compare!="hmmmmmm")

#Defining the order, can change if needed
meltPwBC$Compare<-factor(meltPwBC$Compare,
                        levels= c("LADA vs T1D", "LADA vs T2D", "LADA vs Control",
                                   "T1D vs T2D", "T1D vs Control", "T2D vs Control"))

violinDissi<-ggplot(meltPwBC, aes(x=Compare, y=value)) +
  geom_violin(trim=FALSE, fill="purple", colour="purple") +
  stat_summary(fun.data="mean_sdl", mult=1, #mean ± a constant (mult=1) times the st.dev
              geom="pointrange", width=0.2 ) +
  #geom_dotplot(binaxis='y', stackdir='center', dotsize=0.01) +
  labs(x="", y="Dissimilarity") +
  theme_bw() +
  theme(legend.position="none", panel.grid.major = element_blank(),
        panel.grid.minor = element_blank())

violinDissi

```

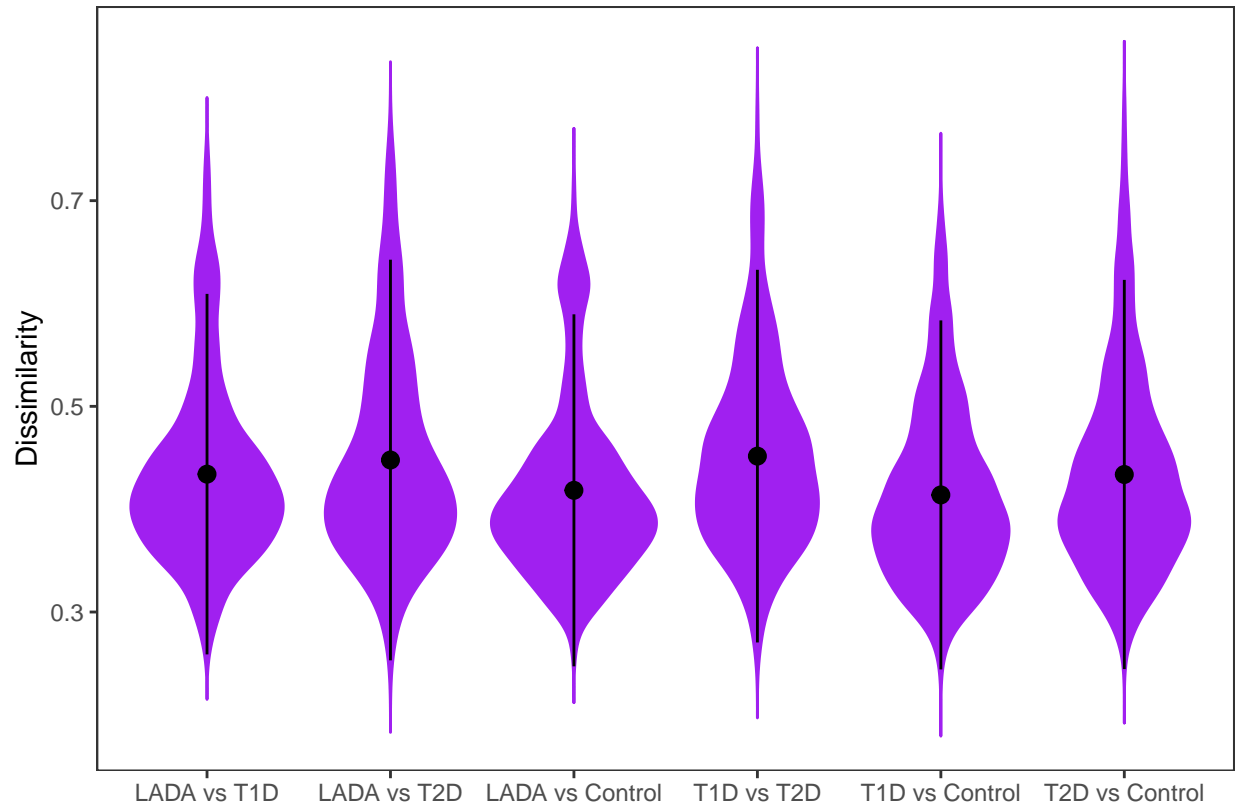

```
pdf(paste("MicroLADA_ViolinDissiRemMet", ".pdf", sep=""), width=12, height=6)
violinDissi
dev.off()
```

```
## pdf
## 2
```

```
#Kruskal test
kruskal.test(value ~ Compare, data=meltPwBC)
```

```
##
## Kruskal-Wallis rank sum test
##
## data: value by Compare
## Kruskal-Wallis chi-squared = 141.97, df = 5, p-value < 2.2e-16
```

```
#If significant Mann-Whitney pairwise post-test
pairwise.wilcox.test(meltPwBC$value, meltPwBC$Compare, p.adjust.method="bonferroni")
```

```
##
## Pairwise comparisons using Wilcoxon rank sum test with continuity correction
##
## data: meltPwBC$value and meltPwBC$Compare
##
```

```
##          LADA vs T1D LADA vs T2D LADA vs Control T1D vs T2D
## LADA vs T2D      1.00000      -          -          -
## LADA vs Control  0.00475      3.9e-05      -          -
## T1D vs T2D      0.00693      1.00000      5.8e-16      -
## T1D vs Control  0.00018      4.7e-07      1.00000      < 2e-16
## T2D vs Control  1.00000      0.43232      0.00046      3.4e-06
##          T1D vs Control
## LADA vs T2D      -
## LADA vs Control  -
## T1D vs T2D      -
## T1D vs Control  -
## T2D vs Control  4.9e-09
##
## P value adjustment method: bonferroni
```

```
#####
##Create long format of dissimilarities
##Multi dimensional scaling
dismatrix <- vegdist(decostand(t(Taxonomy2), method="hellinger"), method="bray")

#Contains all values except the ones equal to 0
meltPwBC<-subset(melt(as.matrix(dismatrix)), value!=0)
#meltPwBC<-subset(melt(as.matrix(dismatrix)))
rm(dismatrix) #Have comparisons of both 1vs2 and 2vs1 ..., but are removed during the
              #following filtration.
              #The same applies to comparisons of the same sample with itself

LADA_V <- subset(Metadata2, Diagnosis=="LADA") %>% dplyr::select(one_of("MicrobiomeID")) %>%
  pull(MicrobiomeID) #>% droplevels()
T1D_V <- subset(Metadata2, Diagnosis=="T1D") %>% dplyr::select(one_of("MicrobiomeID")) %>%
  pull(MicrobiomeID) #>% droplevels()
T2D_V <- subset(Metadata2, Diagnosis=="T2D") %>% dplyr::select(one_of("MicrobiomeID")) %>%
  pull(MicrobiomeID) #>% droplevels()
Control_V <- subset(Metadata2, Diagnosis=="Control") %>% dplyr::select(one_of("MicrobiomeID")) %>%
  pull(MicrobiomeID) #>% droplevels()

meltPwBC$Compare <- ifelse (meltPwBC$Var1 %in% LADA_V & meltPwBC$Var2 %in%
  LADA_V, "LADA",
  ifelse (meltPwBC$Var1 %in% T1D_V & meltPwBC$Var2 %in%
  T1D_V, "T1D",
  ifelse (meltPwBC$Var1 %in% T2D_V & meltPwBC$Var2 %in%
  T2D_V, "T2D",
  ifelse (meltPwBC$Var1 %in% Control_V & meltPwBC$Var2 %in%
  Control_V, "Control",
  ifelse (meltPwBC$Var1 %in% LADA_V & meltPwBC$Var2 %in%
  T1D_V, "LADA vs T1D",
  ifelse (meltPwBC$Var1 %in% LADA_V & meltPwBC$Var2 %in%
  T2D_V, "LADA vs T2D",
  ifelse (meltPwBC$Var1 %in% LADA_V & meltPwBC$Var2 %in%
  Control_V, "LADA vs Control",
  ifelse (meltPwBC$Var1 %in% T1D_V & meltPwBC$Var2 %in%
```



```

                T2D_V, "T1D vs T2D",
            ifelse (meltPwBC$Var1 %in% T1D_V & meltPwBC$Var2 %in%
                Control_V, "T1D vs Control",
            ifelse (meltPwBC$Var1 %in% T2D_V & meltPwBC$Var2 %in%
                Control_V, "T2D vs Control", "hmmmmmm")))))))))))
##Control validation
#table((meltPwBC$Var1 %in% LADA_V) & (meltPwBC$Var2 %in% T1D_V))
#table(meltPwBC$Compare)

meltPwBC<-subset(meltPwBC, meltPwBC$Compare!="hmmmmmm")

##Defining the order, can change if needed
meltPwBC$Compare<-factor(meltPwBC$Compare, levels= c("Control", "T1D",
                                                    "T2D", "LADA",
                                                    "LADA vs T1D", "LADA vs T2D",
                                                    "LADA vs Control", "T1D vs T2D",
                                                    "T1D vs Control", "T2D vs Control"))

violinDissi<-ggplot(meltPwBC, aes(x=Compare, y=value)) +
  geom_violin(trim=FALSE, fill="purple", colour="purple") +
  stat_summary(fun.data="mean_sdl", mult=1, #mean ± a constant (mult=1) times the st.dev
              geom="pointrange", width=0.2 ) +
  #geom_dotplot(binaxis='y', stackdir='center', dotsize=0.01) +
  labs(x="", y="Dissimilarity") +
  theme_bw() +
  theme(legend.position="none", panel.grid.major = element_blank(),
        panel.grid.minor = element_blank(),
        axis.text.x = element_text(angle = 45, hjust = 1))

violinDissi

```

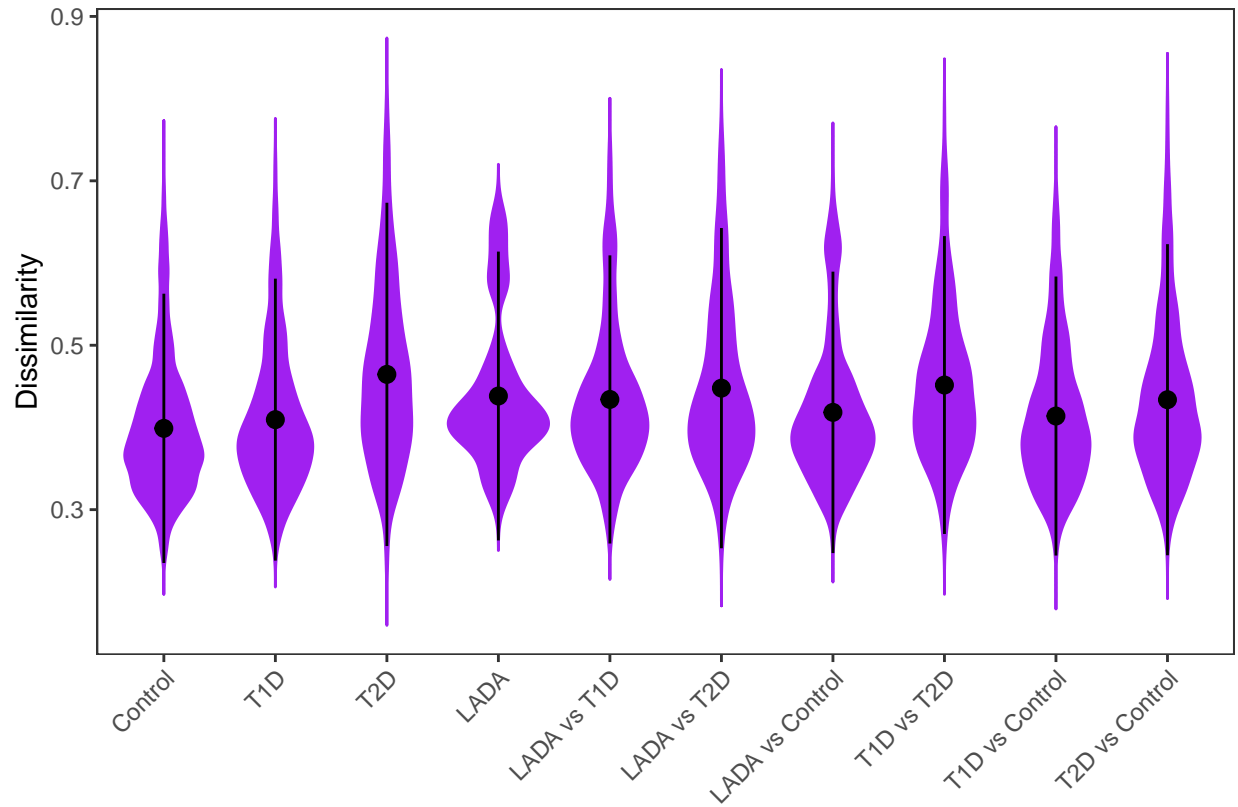

```
pdf(paste("MicroLADA_ViolinDissiAllCompRemMet", ".pdf", sep=""), width=12, height=6)
violinDissi
dev.off()
```

```
## pdf
## 2
```

```
#Kruskal test
kruskal.test(value ~ Compare, data=meltPwBC)
```

```
##
## Kruskal-Wallis rank sum test
##
## data: value by Compare
## Kruskal-Wallis chi-squared = 585.56, df = 9, p-value < 2.2e-16
```

```
#If significant Mann-Whitney pairwise post-test
pairwise.wilcox.test(meltPwBC$value, meltPwBC$Compare, p.adjust.method="bonferroni")
```

```
##
## Pairwise comparisons using Wilcoxon rank sum test with continuity correction
##
## data: meltPwBC$value and meltPwBC$Compare
##
```

```

##          Control T1D      T2D      LADA      LADA vs T1D LADA vs T2D
## T1D          0.03991 -          -          -          -          -
## T2D          < 2e-16 < 2e-16 -          -          -          -
## LADA          8.1e-07 0.00267 0.20726 -          -          -
## LADA vs T1D   4.9e-15 7.8e-06 0.00039 1.00000 -          -
## LADA vs T2D   < 2e-16 4.6e-08 0.84965 1.00000 1.00000 -
## LADA vs Control 2.1e-09 0.57580 < 2e-16 0.19224 0.01425 0.00012
## T1D vs T2D    < 2e-16 < 2e-16 1.00000 1.00000 0.02078 1.00000
## T1D vs Control 1.8e-11 1.00000 < 2e-16 0.05540 0.00053 1.4e-06
## T2D vs Control < 2e-16 2.3e-09 2.8e-08 1.00000 1.00000 1.00000
##          LADA vs Control T1D vs T2D T1D vs Control
## T1D          -          -          -
## T2D          -          -          -
## LADA          -          -          -
## LADA vs T1D   -          -          -
## LADA vs T2D   -          -          -
## LADA vs Control -          -          -
## T1D vs T2D    1.7e-15          -          -
## T1D vs Control 1.00000          < 2e-16 -
## T2D vs Control 0.00137          1.0e-05 1.5e-08
##
## P value adjustment method: bonferroni

```

```

#####
meltPwBC<-filter(meltPwBC,
  Compare == "Control" | Compare == "T1D" |
  Compare == "T2D" | Compare == "LADA")

meltPwBC$Compare<-ordered(meltPwBC$Compare,
  levels=c("Control", "T1D", "LADA", "T2D"))

violinDisi<-ggplot(meltPwBC, aes(x=Compare, y=value)) +
  geom_violin(aes(fill=Compare, trim=FALSE)) +
  stat_summary(fun.data="mean_sdl", mult=1, #mean ± a constant (mult=1) times the st.dev
  geom="pointrange", width=0.2 ) +
  labs(y="Disimilarity") +
  scale_fill_manual(values=c(Control = "#666666", T1D = "#1F78B4",
  T2D = "#33A02C", LADA = "#E31A1C")) +
  theme_bw() +
  theme(legend.position="none", panel.grid.major = element_blank(),
  panel.grid.minor = element_blank(), axis.title=element_text(size=20),
  axis.title.x = element_blank(),
  axis.text.x = element_text(angle = 45, hjust = 1, size=16),
  axis.text.y = element_text(angle = 45, hjust = 1, size=12))

violinDisi

```

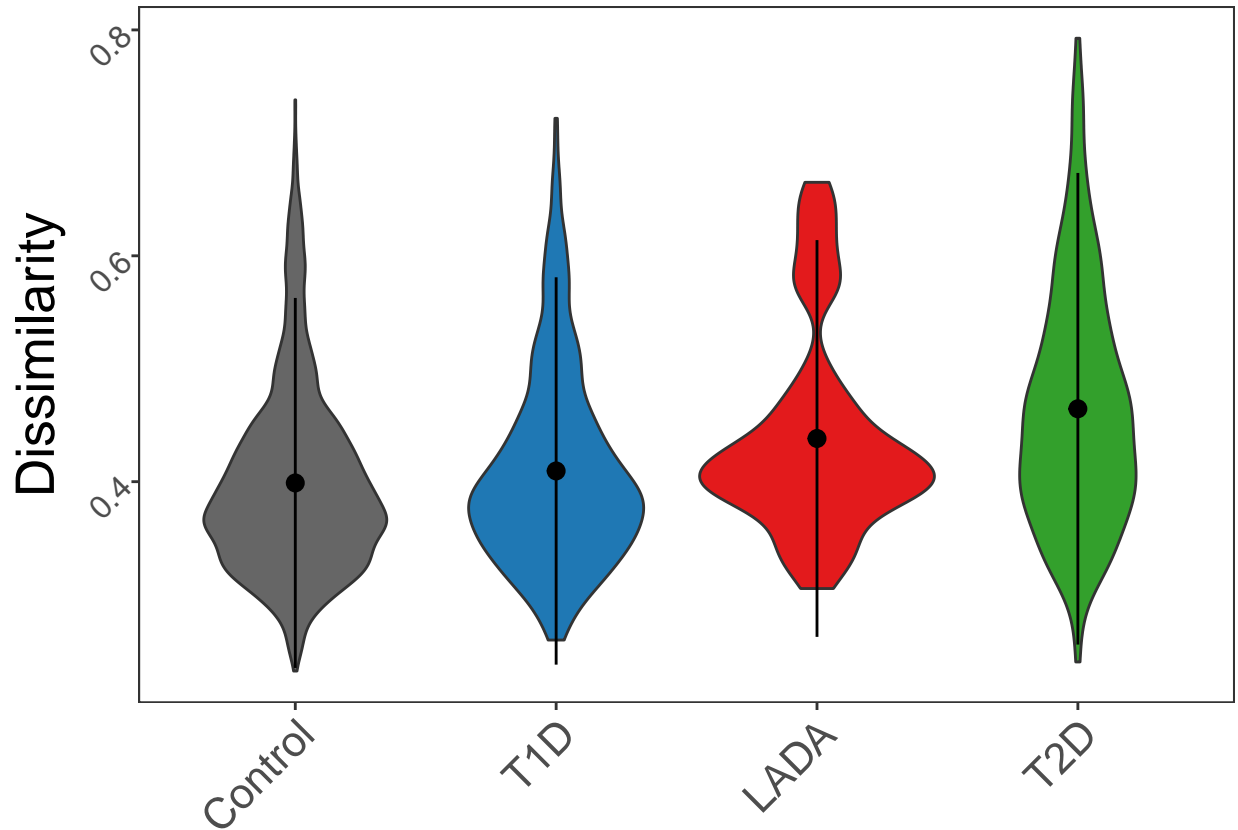

```
pdf(paste("MicroLADA_ViolinDissiCompWithinRemMet", ".pdf", sep=""), width=12, height=6)
violinDissi
dev.off()
```

```
## pdf
## 2
```

```
#Save plot in previous list
Fig1ListRemMet[[ "DissiBrayHel" ]] <- violinDissi
```

```
#Kruskal test
kruskal.test(value ~ Compare, data=meltPwBC)
```

```
##
## Kruskal-Wallis rank sum test
##
## data: value by Compare
## Kruskal-Wallis chi-squared = 238.56, df = 3, p-value < 2.2e-16
```

```
#If significant Mann-Whitney pairwise post-test
pairwise.wilcox.test(meltPwBC$value, meltPwBC$Compare, p.adjust.method="bonferroni")
```

```
##
## Pairwise comparisons using Wilcoxon rank sum test with continuity correction
```

```
##
## data: meltPwBC$value and meltPwBC$Compare
##
##      Control T1D      LADA
## T1D  0.00532 -        -
## LADA 1.1e-07 0.00036 -
## T2D  < 2e-16 < 2e-16 0.02763
##
## P value adjustment method: bonferroni
```

## PCoA

Part of figure 1

```
rm(list=setdiff(ls(), c("Metadata", "MetadataMed", "Feature", "TaxonomyDA", "Taxonomy",
                        "Fig1List", "Fig1ListRemMet")))

Subset <- c("LADAControl", "LADAT1D", "LADAT2D", "All")
#i <- c("All")
#i <- c("LADAControl")
for (i in Subset) {

  #Subsetting Metadata according to
  if (i=="All") {
    print(i)
    Metadata2 <- Metadata
  } else if (i=="LADAControl") {
    print(i)
    Metadata2<-filter(Metadata, Diagnosis == "LADA" | Diagnosis == "Control")
  } else if (i=="LADAT1D") {
    print(i)
    Metadata2<-filter(Metadata, Diagnosis == "LADA" | Diagnosis == "T1D")
  } else if (i=="LADAT2D") {
    print(i)
    Metadata2<-filter(Metadata, Diagnosis == "LADA" | Diagnosis == "T2D")
  } else {
    print("Subset defined not valid")
  }

  #Apply subsetting to Taxonomy table
  Taxonomy2<-dplyr::select(Taxonomy, one_of(as.character(Metadata2$MicrobiomeID)))

  #Hellinger transformation
  Taxonomy2 <- data.frame(t(decostand(t(Taxonomy2), method="hellinger")))
  #Maks TSS
  Taxonomy2<-sweep(Taxonomy2, 2, colSums(Taxonomy2), FUN="/")
  #Dissimilarity
  distmatrix <- vegdist(t(Taxonomy2), method="bray")
  #Multi dimensional scaling with capscale
  PCoAcsObject<-capscale(distmatrix~1)
```

```

##Add eig to plot axes. with cmdscale there are negative values not with capscale
eig <- PCoAcsObject$CA$eig
# Calculate the variation explained by PCoA1, 2, 3 and 4
# and use it to generate axis labels
eig_1_2 <- eig[1:4] / sum(eig) * 100 #Vector with variance explained
# by the first 4 axes
eig_1 <- paste("PCoA1", round(eig_1_2[1], digits = 2), "% variance")
eig_2 <- paste("PCoA2", round(eig_1_2[2], digits = 2), "% variance")
eig_3 <- paste("PCoA3", round(eig_1_2[3], digits = 2), "% variance")
eig_4 <- paste("PCoA4", round(eig_1_2[4], digits = 2), "% variance")

##Pull out coordinates for plotting from the ca object
#Structuring to add to Metadata2
PCoACA<-PCoAcsObject$CA #The ca object contains the actual ordination results:
#u ((Weighted) orthonormal site scores),
#v ((Weighted) orthonormal species scores) all na in mine (unconstrained),
#Xbar (The standardized data matrix after previous stages of analysis),
#and imaginary.u.eig ???.
#Info http://cc.oulu.fi/~jarioksa/softhelp/vegan/html/cca.object.html
PCoA<-as.data.frame(PCoACA$u)
#Change colnames. Now add dis and trans info to names
colnames(PCoA) <- c("MDS1BrayHel", "MDS2BrayHel", "MDS3BrayHel", "MDS4BrayHel")
#Add row names to df
PCoA$MicrobiomeID <- row.names(PCoA)
#Remove leading X
PCoA$MicrobiomeID <- gsub("X", "", PCoA$MicrobiomeID)
#Merge according to Sample
Metadata2<-merge(Metadata2, PCoA, by="MicrobiomeID")

#PCoA MDS1 and MDS2 pdf
pdf(paste("MicroLADA_PCoA", i, ".pdf", sep=""), width=9, height=6)
print(ggplot(Metadata2) +
  geom_point(aes(x=MDS1BrayHel, y=MDS2BrayHel, color = Diagnosis,
                group = Diagnosis), size=3) +
  stat_ellipse(aes(MDS1BrayHel, y=MDS2BrayHel, color = Diagnosis,
                  group = Diagnosis)) +
  scale_color_manual(values=c(Control = "#666666", T1D = "#1F78B4",
                              T2D = "#33A02C", LADA = "#E31A1C"))) +
  ggtitle(paste("PCoA", i, sep=" ")) +
  labs(colour="Diagnosis", x = eig_1, y = eig_2) +
  theme_bw() +
  theme(panel.grid.major = element_blank(), panel.grid.minor = element_blank(),
        axis.title=element_text(size=12), legend.position="bottom"))
dev.off()

#PCoA MDS1 and MDS2 plotly
print(ggplotly(ggplot(Metadata2[, c(6,8,13,14)]) +
  geom_point(aes(x=MDS1BrayHel, y=MDS2BrayHel, color = Diagnosis,
                group = Dg_LADA), size=3) +
  stat_ellipse(aes(MDS1BrayHel, y=MDS2BrayHel, color = Diagnosis,
                  group = Diagnosis)) +
  scale_color_manual(values=c(Control = "#666666", T1D = "#1F78B4",
                              T2D = "#33A02C", LADA = "#E31A1C")))

```

```

                T2D = "#33A02C", LADA = "#E31A1C")) +
ggtitle(paste("PCoA", i, sep=" ")) +
labs(colour="Diagnosis", x = eig_1, y = eig_2) +
theme_bw() +
theme(panel.grid.major = element_blank(), panel.grid.minor = element_blank(),
      axis.title=element_text(size=12), legend.position="bottom"))

#PCoA MDS1 and MDS2
print(ggplot(Metadata2) +
      geom_point(aes(x=MDS1BrayHel, y=MDS2BrayHel, color = Diagnosis,
                    group = Diagnosis), size=3) +
      stat_ellipse(aes(MDS1BrayHel, y=MDS2BrayHel, color = Diagnosis,
                      group = Diagnosis)) +
      scale_color_manual(values=c(Control = "#666666", T1D = "#1F78B4",
                                   T2D = "#33A02C", LADA = "#E31A1C")) +
ggtitle(paste("PCoA", i, sep=" ")) +
labs(colour="Diagnosis", x = eig_1, y = eig_2) +
theme_bw() +
theme(panel.grid.major = element_blank(), panel.grid.minor = element_blank(),
      axis.title=element_text(size=12), legend.position="bottom"))

#PCoA MDS1 and MDS3
print(ggplot(Metadata2) +
      geom_point(aes(x=MDS1BrayHel, y=MDS3BrayHel, color = Diagnosis,
                    group = Diagnosis), size=3) +
      stat_ellipse(aes(MDS1BrayHel, y=MDS3BrayHel, color = Diagnosis,
                      group = Diagnosis)) +
      scale_color_manual(values=c(Control = "#666666", T1D = "#1F78B4",
                                   T2D = "#33A02C", LADA = "#E31A1C")) +
ggtitle(paste("PCoA", i, sep=" ")) +
labs(colour="Diagnosis", x = eig_1, y = eig_3) +
theme_bw() +
theme(panel.grid.major = element_blank(), panel.grid.minor = element_blank(),
      axis.title=element_text(size=12), legend.position="bottom"))

#PCoA MDS2 and MDS3
print(ggplot(Metadata2) +
      geom_point(aes(x=MDS2BrayHel, y=MDS3BrayHel, color = Diagnosis,
                    group = Diagnosis), size=3) +
      stat_ellipse(aes(MDS2BrayHel, y=MDS3BrayHel, color = Diagnosis,
                      group = Diagnosis)) +
      scale_color_manual(values=c(Control = "#666666", T1D = "#1F78B4",
                                   T2D = "#33A02C", LADA = "#E31A1C")) +
ggtitle(paste("PCoA", i, sep=" ")) +
labs(colour="Diagnosis", x = eig_2, y = eig_3) +
theme_bw() +
theme(panel.grid.major = element_blank(), panel.grid.minor = element_blank(),
      axis.title=element_text(size=12), legend.position="bottom"))

#Add a categorical indicator of group in Metadata
Metadata2$Metformine<-as.factor(ifelse(grepl("1", Metadata2$Metformin), "Yes",
                                       ifelse(grepl("0", Metadata2$Metformin),
                                               "No", "Unknown")))

```

```

#Order Treatment metformine for plotting
Metadata2$Metformine <- factor(Metadata2$Metformine, levels=c("Yes", "No", "Unknown"))
#Create PCoA for figure 1
if (i=="All") {
  PCoAall<-ggplot(Metadata2) +
  geom_point(aes(MDS1BrayHel, MDS2BrayHel, color = Diagnosis, #shape = Metformine,
                group = Diagnosis), size=5) +
  stat_ellipse(aes(MDS1BrayHel, MDS2BrayHel, color = Diagnosis, group = Diagnosis)) +
  #stat_ellipse(aes(MDS1BrayHel, MDS2BrayHel, group = Metformine,
  #                linetype=factor(Metadata2$Metformine)), alpha = 0.7) +
  scale_color_manual(values=c(Control = "#666666", T1D = "#1F78B4",
                              T2D = "#33A02C", LADA = "#E31A1C")) +
  scale_shape_manual(values=c(3, 16)) +
  scale_linetype_manual(values=c("longdash", "dotted"), guide=FALSE) +
  #ggtitle(paste("PCoA", "LADA & T2D Metformin", sep=" ")) +
  labs(colour="Diagnosis", x = eig_1, y = eig_2) + #, shape="Metformin treatment"
  theme_bw() +
  theme(panel.grid.major = element_blank(), panel.grid.minor = element_blank(),
        axis.title=element_text(size=22), legend.position="bottom",
        legend.title=element_text(size=20), legend.text=element_text(size=20),
        axis.text.x = element_text(angle = 45, hjust = 1, size=12),
        axis.text.y = element_text(angle = 45, hjust = 1, size=12))

  print(PCoAall)
  pdf("MicroLADA_PCoAAllMet.pdf", width=9, height=6)
  print(PCoAall)
  dev.off()
  #Save plot in previous list
  Fig1List[[ "PCoAall" ]] <- PCoAall
  #return(PCoAall)
}

##Stressplot
##Extract ordination distances and merge with observed dissimilarity
#stress<-stressplot(PCoAcsObject)
#df <- melt(as.matrix(stress))
#names(df)<-c("rowOrd", "colOrd", "OrdDist")
#df<-filter(df, OrdDist>0)
#df2 <- melt(as.matrix(distmatrix))
#names(df2)<-c("rowObs", "colObs", "ObsDism")
#df2<-filter(df2, ObsDism>0)
#df<-unite(df, mergecol, c(rowOrd, colOrd), remove=FALSE)
#df2<-unite(df2, mergecol, c(rowObs, colObs), remove=FALSE)
#ggstress<-merge(df, df2, by="mergecol")

##create stressplot
#print(ggplot(ggstress) +
#  # geom_point(aes(ObsDism, OrdDist)) +
#  # ggtitle(paste("Stressplot", i, sep=" ")) +
#  # labs(x = "Observed dissimilarity", y = "Ordination distance") +
#  # theme_bw() +
#  # theme(panel.grid.major = element_blank(), panel.grid.minor = element_blank(),
#  #       axis.title=element_text(size=12)))

```



```

##Screeplot
#screeplot<-data.frame(PCoAcsObject$CA$eig)
#colnames(screeplot)<-c("eig")
#screeplot$eig <- screeplot$eig[1:length(screeplot$eig)] /
# sum(screeplot$eig) * 100
#screeplot<-add_rownames(screeplot, "MDS")
#screeplot$MDS <- factor(screeplot$MDS,
#                         levels=c(sprintf("MDS%d", 1:length(screeplot$eig))))

##create screeplot
#print(ggplot(screeplot, aes(x=MDS, y=eig)) +
#      # geom_bar(stat="identity") +
#      # labs(x ="MDS", y ="eig (%)") +
#      # ggtitle(paste("Screeplot", i, sep=" ")) +
#      # theme_bw() +
#      # theme(panel.grid.major = element_blank(), panel.grid.minor = element_blank(),
#      #       axis.title=element_text(size=12), axis.text.x=element_blank(),
#      #       axis.ticks.x=element_blank()))
}

```

```
## [1] "LADAControl"
```

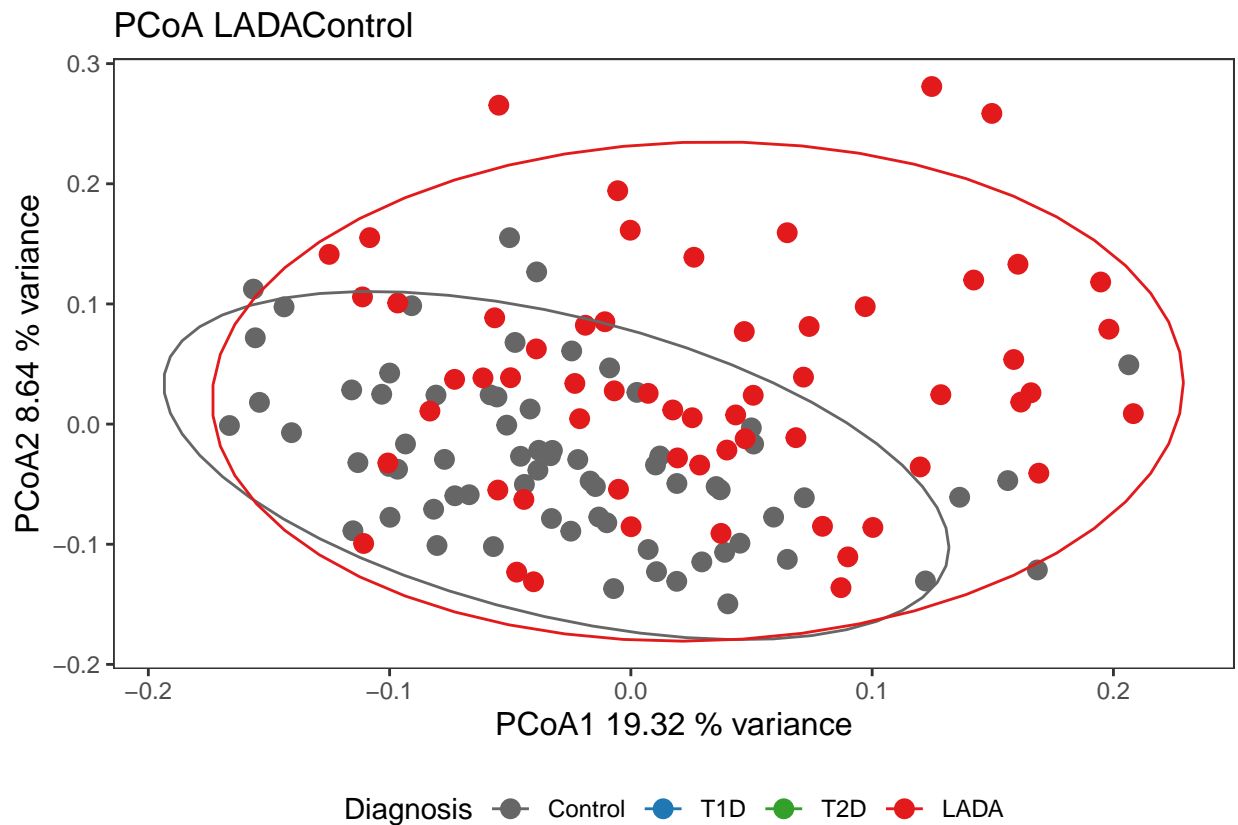

PCoA LADAControl

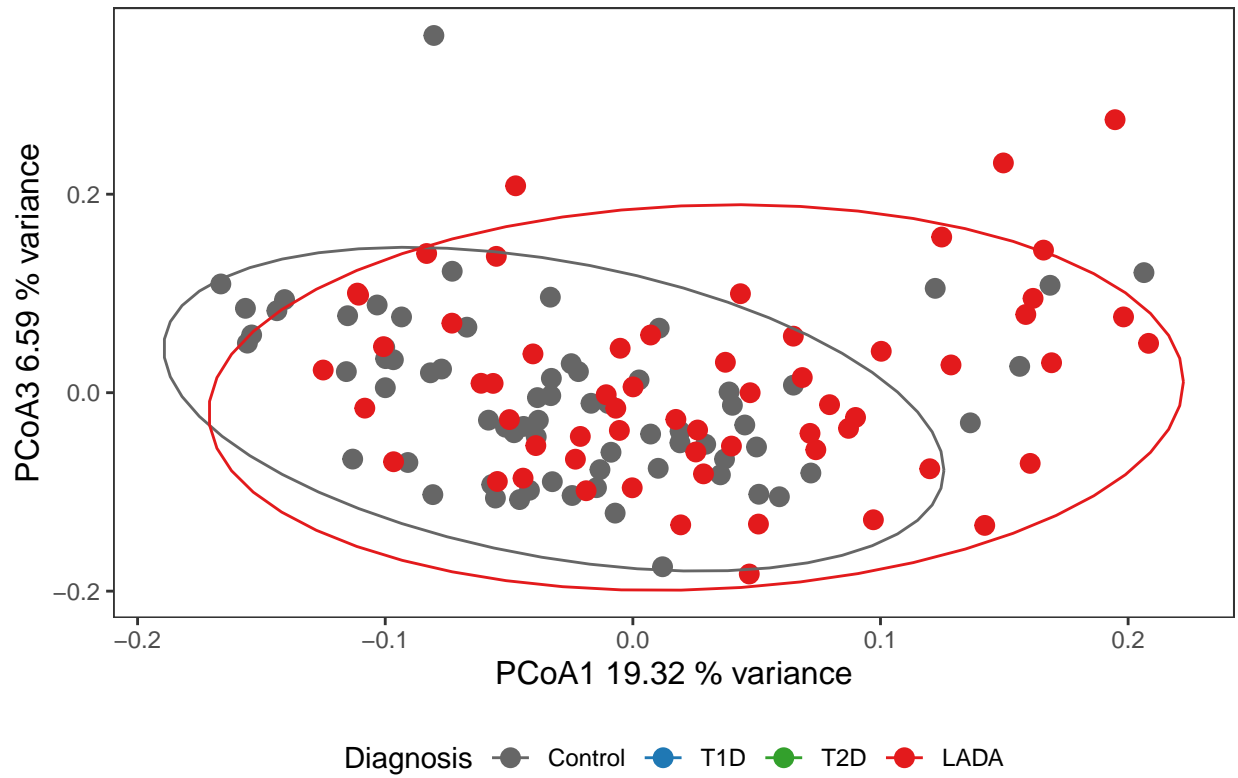

```
## [1] "LADAT1D"
```

PCoA LADAControl

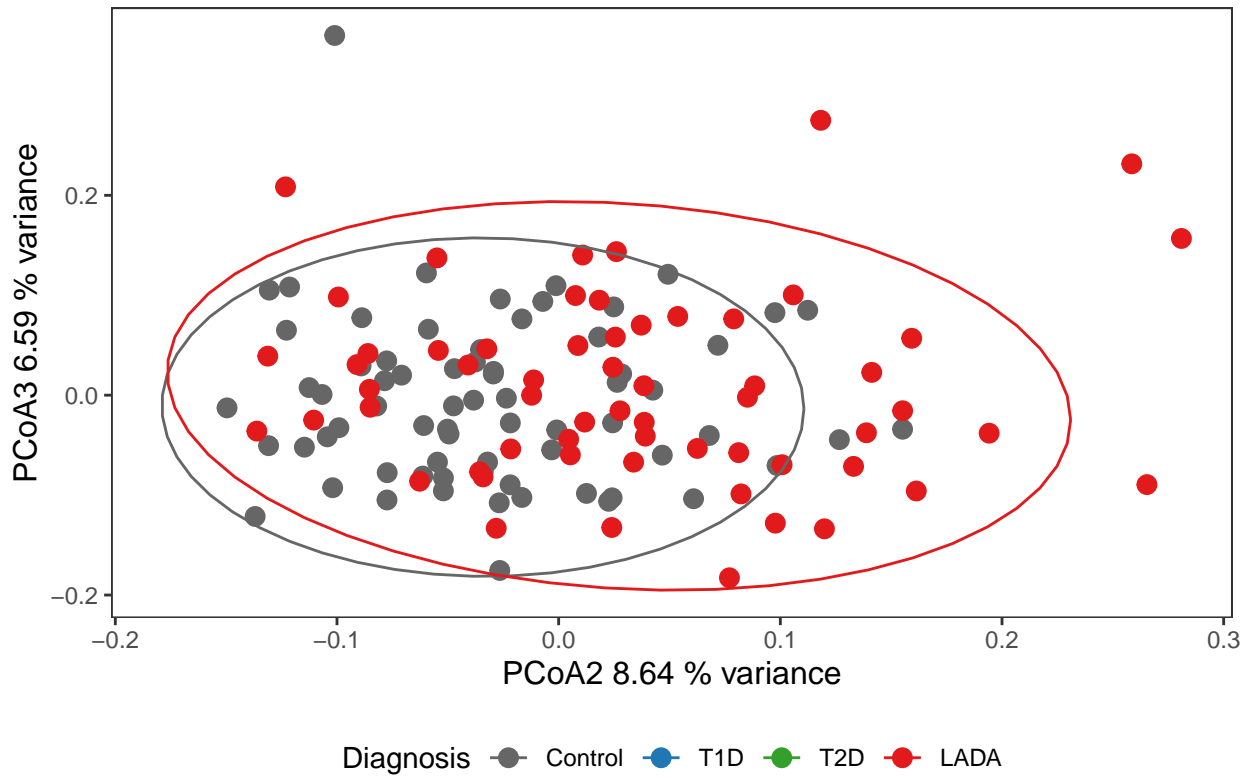

PCoA LADAT1D

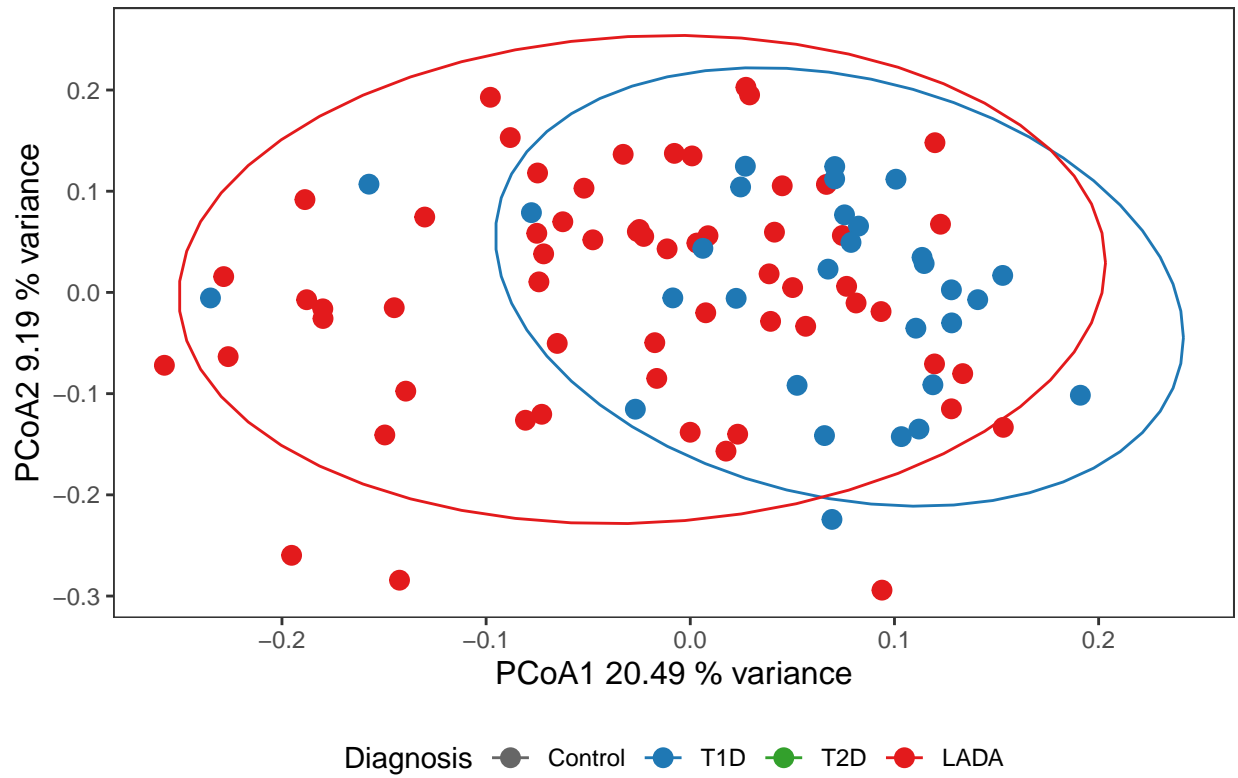

PCoA LADAT1D

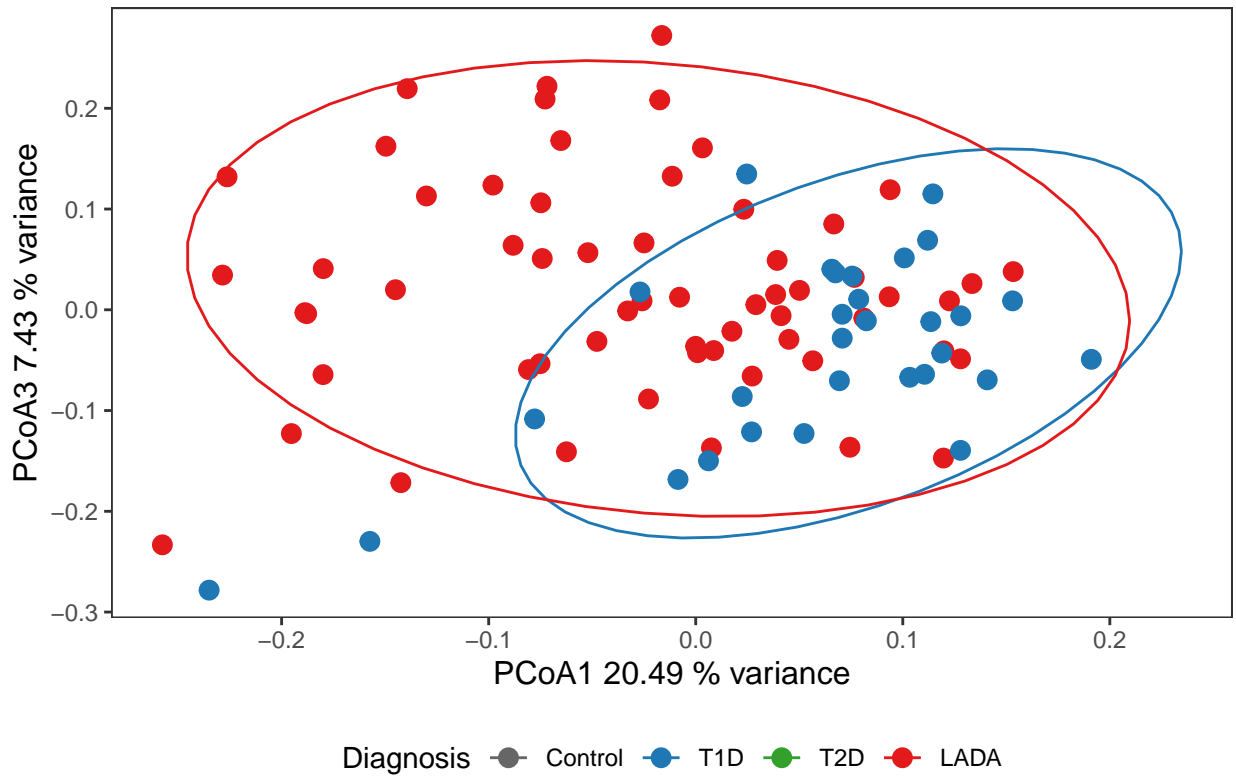

## [1] "LADAT2D"

PCoA LADAT1D

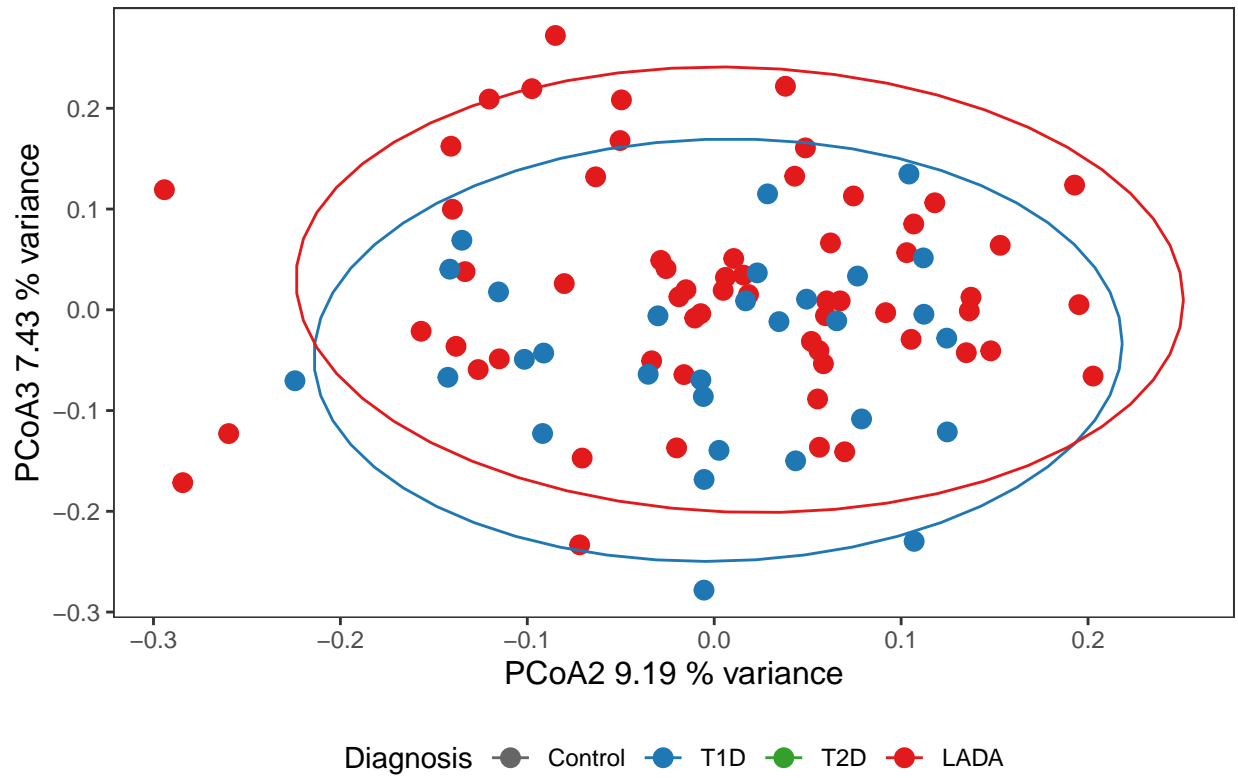

PCoA LADAT2D

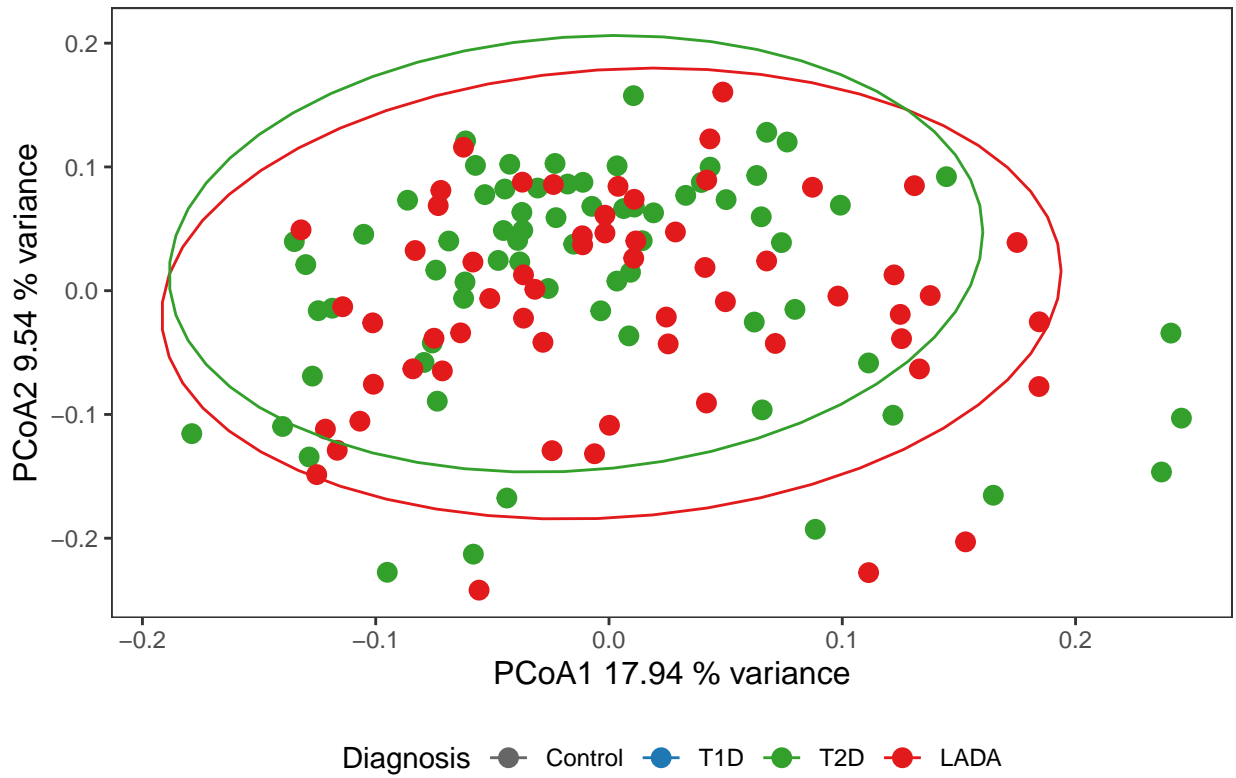

PCoA LADAT2D

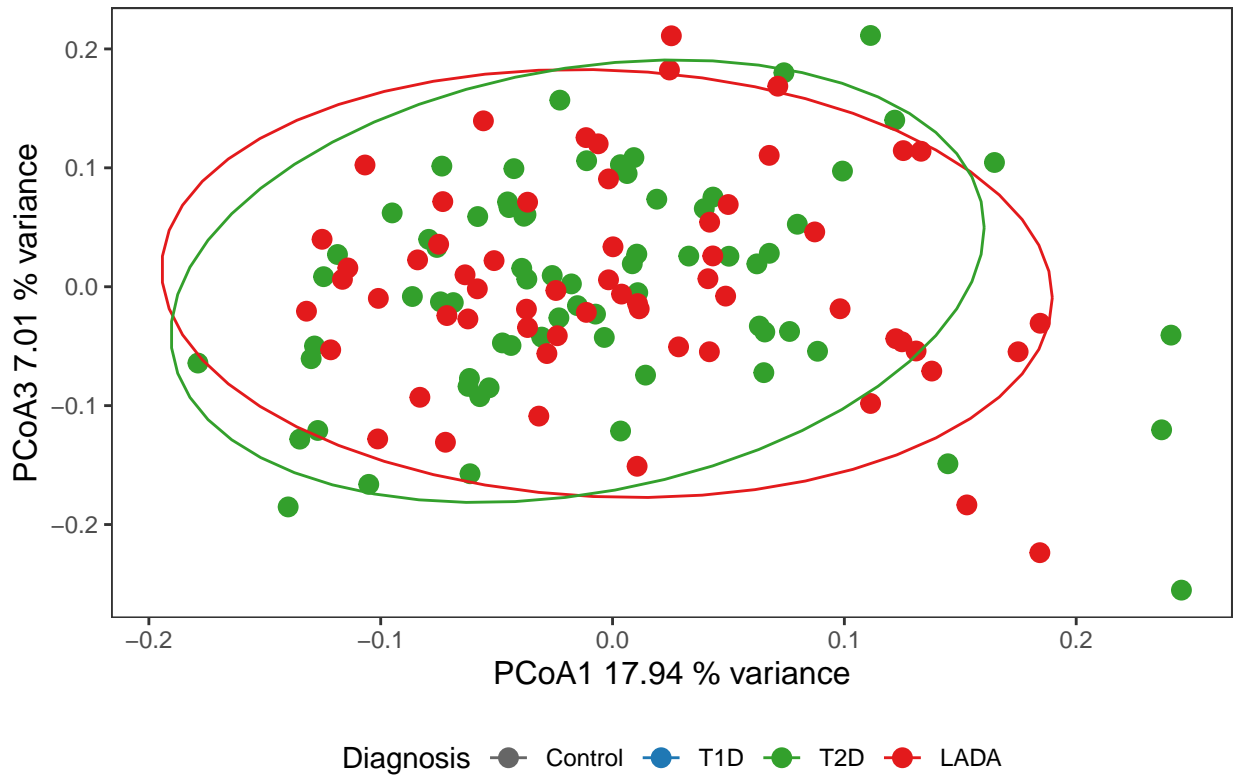

## [1] "All"



PCoA LADAT2D

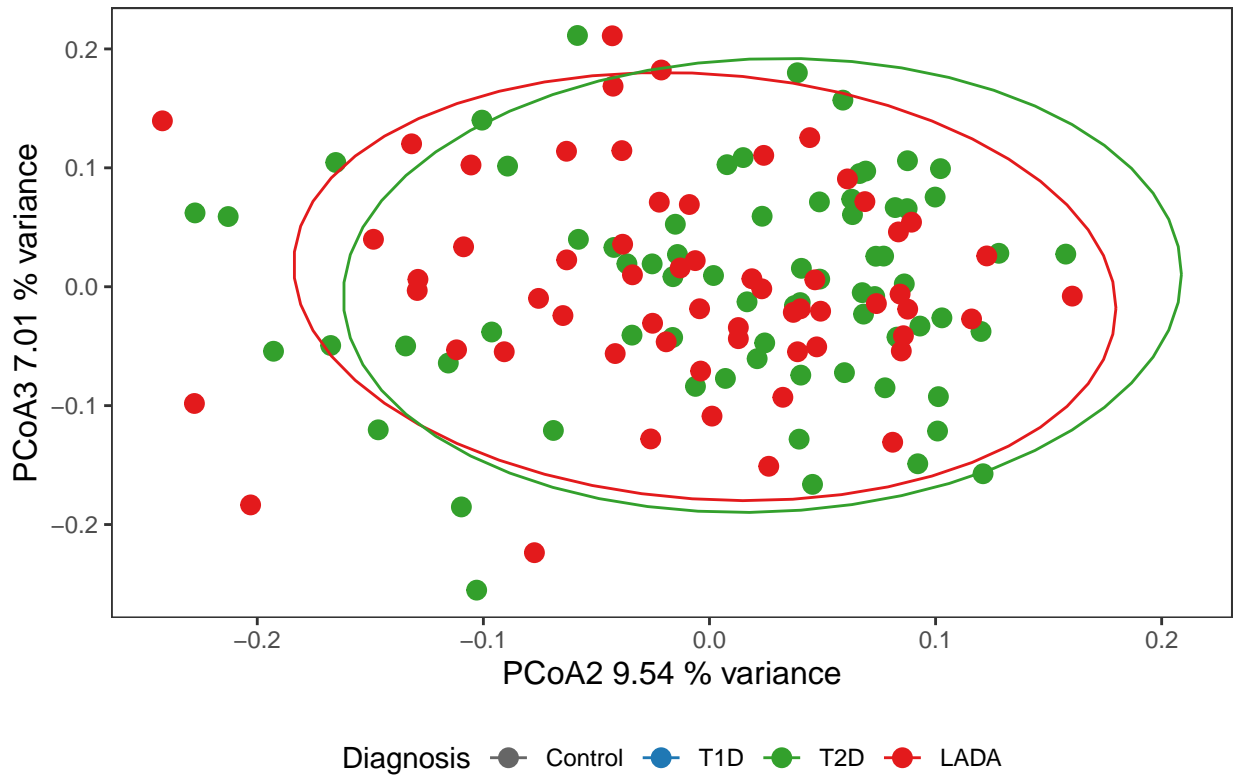

PCoA All

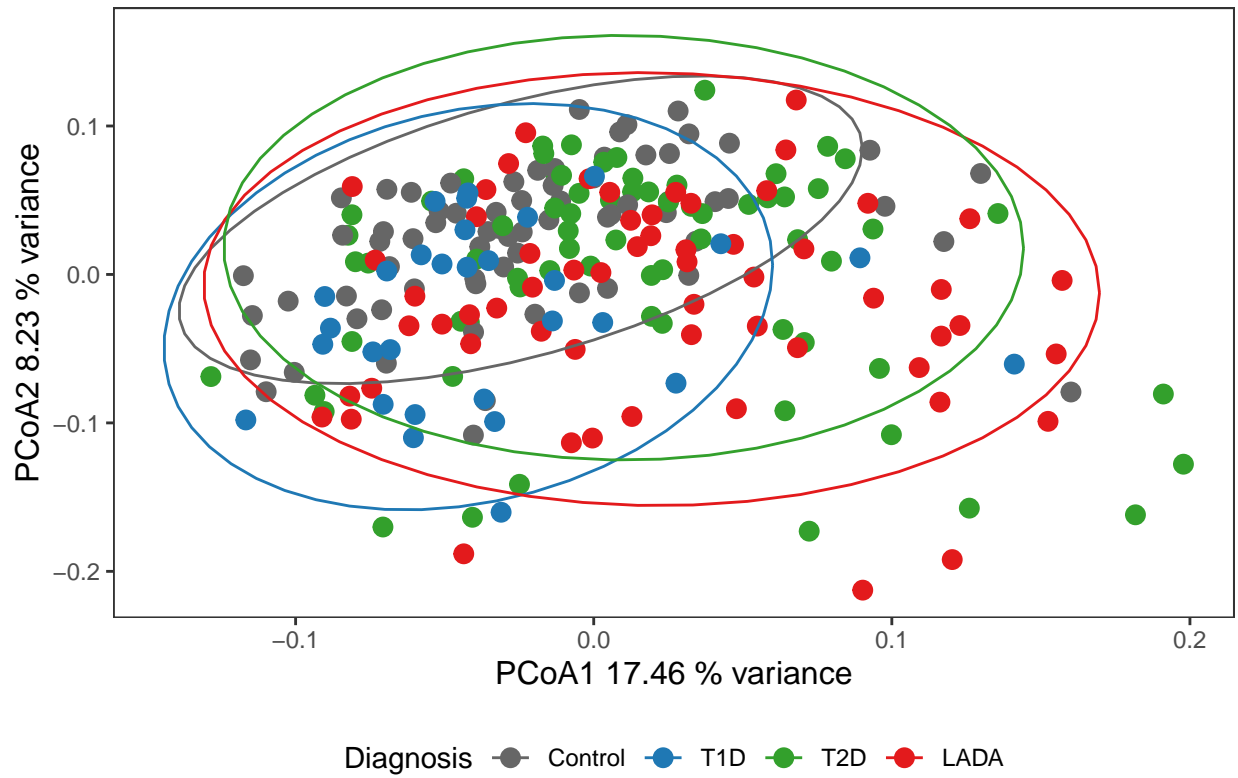

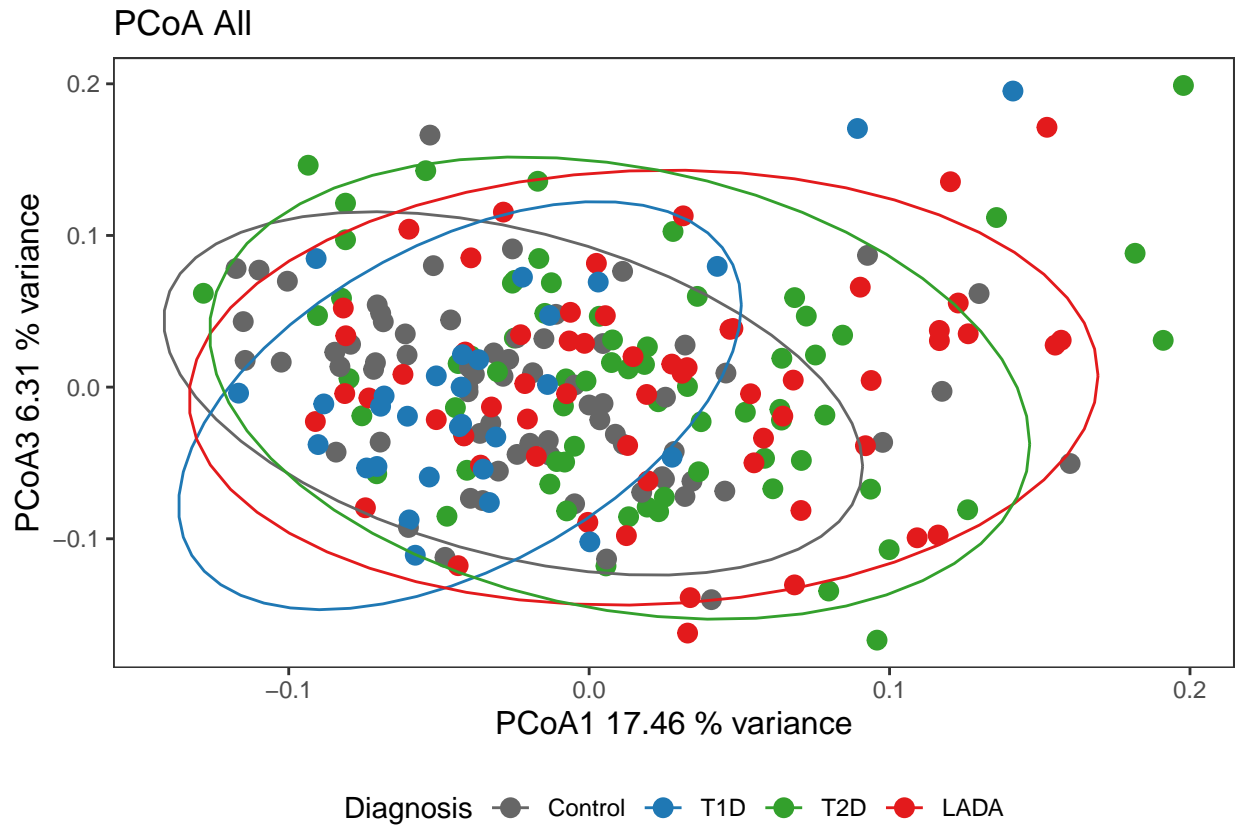

PCoA All

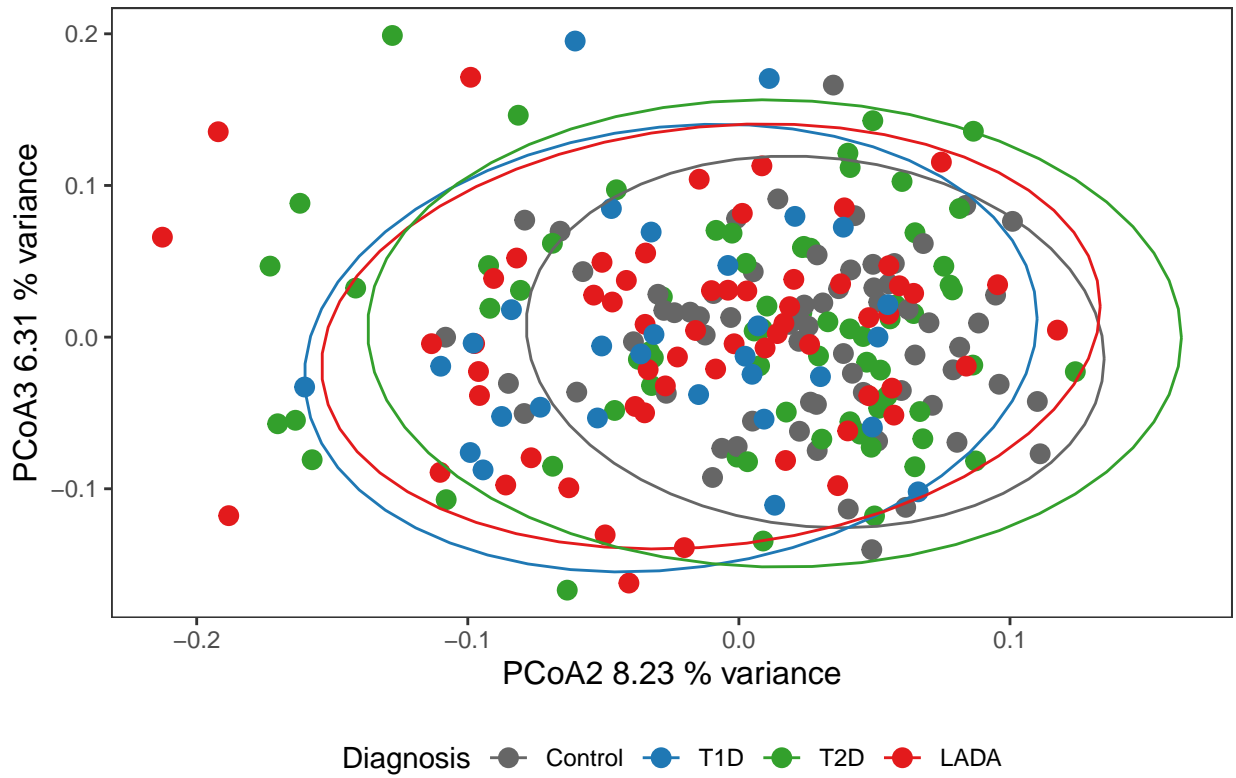

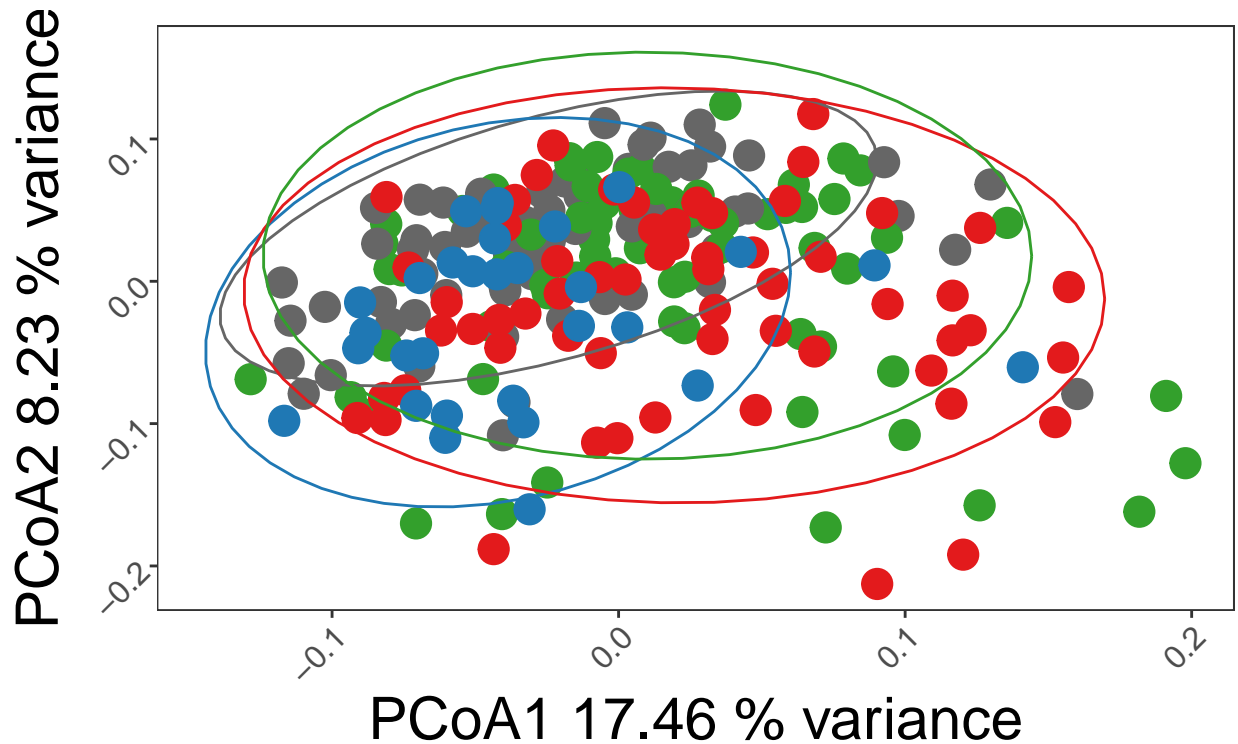

Diagnosis ● Control ● T1D ● T2D ● LADA

PCoA remove metformin

```
rm(list=setdiff(ls(), c("Metadata", "MetadataMed", "Feature", "TaxonomyDA", "Taxonomy",
                        "Fig1List", "Fig1ListRemMet")))
##Removing treated with metformin
#Metadata$Metformin <- ifelse(is.na(Metadata$Metformin), "Unknown", Metadata$Metformin)
Metadata2<-filter(Metadata, !Metformin == 1)
##Applying subsetting to OTU tables
Taxonomy2<-dplyr::select(Taxonomy, one_of(as.character(Metadata2$MicrobiomeID)))
##Remove orgs that are not present after subsetting.
Taxonomy2 <- Taxonomy2[rowSums(Taxonomy2)>0,]

Subset <- c("LADAControl", "LADAT1D", "LADAT2D", "All")
#i <- c("All")
#i <- c("LADAControl")
for (i in Subset) {

#Subsetting Metadata according to
if (i=="All") {
  print(i)
  Metadata3 <- Metadata2
} else if (i=="LADAControl") {
  print(i)
  Metadata3<-filter(Metadata2, Diagnosis == "LADA" | Diagnosis == "Control")
}
```

```

} else if (i=="LADAT1D") {
  print(i)
  Metadata3<-filter(Metadata2, Diagnosis == "LADA" | Diagnosis == "T1D")
} else if (i=="LADAT2D") {
  print(i)
  Metadata3<-filter(Metadata2, Diagnosis == "LADA" | Diagnosis == "T2D")
} else {
  print("Subset defined not valid")
}

#Apply subsetting to Taxonomy table
Taxonomy3<-dplyr::select(Taxonomy2, one_of(as.character(Metadata3$MicrobiomeID)))

#Hellinger transformation
Taxonomy3 <- data.frame(t(decostand(t(Taxonomy3), method="hellinger")))
#Maks TSS
Taxonomy3<-sweep(Taxonomy3, 2, colSums(Taxonomy3), FUN="/")
#Dissimilarity
distmatrix <- vegdist(t(Taxonomy3), method="bray")
#Multi dimensional scaling with capscale
PCoAcsObject<-capscale(distmatrix~1)

##Add eig to plot axes. with cmdscale there are negative values not with capscale
eig <- PCoAcsObject$CA$eig
# Calculate the variation explained by PCoA1, 2, 3 and 4
# and use it to generate axis labels
eig_1_2 <- eig[1:4] / sum(eig) * 100 #Vector with variance explained
# by the first 4 axes
eig_1 <- paste("PCoA1", round(eig_1_2[1], digits = 2), "% variance")
eig_2 <- paste("PCoA2", round(eig_1_2[2], digits = 2), "% variance")
eig_3 <- paste("PCoA3", round(eig_1_2[3], digits = 2), "% variance")
eig_4 <- paste("PCoA4", round(eig_1_2[4], digits = 2), "% variance")

##Pull out coordinates for plotting from the ca object
#Structuring to add to Metadata2
PCoACA<-PCoAcsObject$CA #The ca object contains the actual ordination results:
#u ((Weighted) orthonormal site scores),
#v ((Weighted) orthonormal species scores) all na in mine (unconstrained),
#Xbar (The standardized data matrix after previous stages of analysis),
#and imaginary.u.eig ???.
#Info http://cc.oulu.fi/~jarioksa/softhelp/vegan/html/cca.object.html
PCoA<-as.data.frame(PCoACA$u)
#Change colnames. Now add dis and trans info to names
colnames(PCoA) <- c("MDS1BrayHel", "MDS2BrayHel", "MDS3BrayHel", "MDS4BrayHel")
#Add row names to df
PCoA$MicrobiomeID <- row.names(PCoA)
#Remove leading X
PCoA$MicrobiomeID <- gsub("X", "", PCoA$MicrobiomeID)
#Merge according to Sample
Metadata4<-merge(Metadata3, PCoA, by="MicrobiomeID")

```

```

#PCoA MDS1 and MDS2 pdf
pdf(paste("MicroLADA_PCoARemMet", i, ".pdf", sep=""), width=9, height=6)
print(ggplot(Metadata4) +
  geom_point(aes(x=MDS1BrayHel, y=MDS2BrayHel, color = Diagnosis,
                group = Diagnosis), size=3) +
  stat_ellipse(aes(MDS1BrayHel, y=MDS2BrayHel, color = Diagnosis,
                  group = Diagnosis)) +
  scale_color_manual(values=c(Control = "#666666", T1D = "#1F78B4",
                              T2D = "#33A02C", LADA = "#E31A1C")) +
  ggtitle(paste("PCoA", i, sep=" ")) +
  labs(colour="Diagnosis", x = eig_1, y = eig_2) +
  theme_bw() +
  theme(panel.grid.major = element_blank(), panel.grid.minor = element_blank(),
        axis.title=element_text(size=12), legend.position="bottom"))
dev.off()

```

```

#PCoA MDS1 and MDS2 plotly
print(ggplotly(ggplot(Metadata4[, c(6,8,13,14)]) +
  geom_point(aes(x=MDS1BrayHel, y=MDS2BrayHel, color = Diagnosis,
                group = Dg_LADA), size=3) +
  stat_ellipse(aes(MDS1BrayHel, y=MDS2BrayHel, color = Diagnosis,
                  group = Diagnosis)) +
  scale_color_manual(values=c(Control = "#666666", T1D = "#1F78B4",
                              T2D = "#33A02C", LADA = "#E31A1C")) +
  ggtitle(paste("PCoA", i, sep=" ")) +
  labs(colour="Diagnosis", x = eig_1, y = eig_2) +
  theme_bw() +
  theme(panel.grid.major = element_blank(), panel.grid.minor = element_blank(),
        axis.title=element_text(size=12), legend.position="bottom")))

```

```

#PCoA MDS1 and MDS2
print(ggplot(Metadata4) +
  geom_point(aes(x=MDS1BrayHel, y=MDS2BrayHel, color = Diagnosis,
                group = Diagnosis), size=3) +
  stat_ellipse(aes(MDS1BrayHel, y=MDS2BrayHel, color = Diagnosis,
                  group = Diagnosis)) +
  scale_color_manual(values=c(Control = "#666666", T1D = "#1F78B4",
                              T2D = "#33A02C", LADA = "#E31A1C")) +
  ggtitle(paste("PCoA", i, sep=" ")) +
  labs(colour="Diagnosis", x = eig_1, y = eig_2) +
  theme_bw() +
  theme(panel.grid.major = element_blank(), panel.grid.minor = element_blank(),
        axis.title=element_text(size=12), legend.position="bottom"))

```

```

#PCoA MDS1 and MDS3
print(ggplot(Metadata4) +
  geom_point(aes(x=MDS1BrayHel, y=MDS3BrayHel, color = Diagnosis,
                group = Diagnosis), size=3) +
  stat_ellipse(aes(MDS1BrayHel, y=MDS3BrayHel, color = Diagnosis,
                  group = Diagnosis)) +
  scale_color_manual(values=c(Control = "#666666", T1D = "#1F78B4",
                              T2D = "#33A02C", LADA = "#E31A1C")) +
  ggtitle(paste("PCoA", i, sep=" ")) +

```

```

labs(colour="Diagnosis", x = eig_1, y = eig_3) +
theme_bw() +
theme(panel.grid.major = element_blank(), panel.grid.minor = element_blank(),
      axis.title=element_text(size=12), legend.position="bottom"))

#PCoA MDS2 and MDS3
print(ggplot(Metadata4) +
      geom_point(aes(x=MDS2BrayHel, y=MDS3BrayHel, color = Diagnosis,
                    group = Diagnosis), size=3) +
      stat_ellipse(aes(MDS2BrayHel, y=MDS3BrayHel, color = Diagnosis,
                      group = Diagnosis)) +
      scale_color_manual(values=c(Control = "#666666", T1D = "#1F78B4",
                                   T2D = "#33A02C", LADA = "#E31A1C")) +
      ggtitle(paste("PCoA", i, sep=" ")) +
      labs(colour="Diagnosis", x = eig_2, y = eig_3) +
      theme_bw() +
      theme(panel.grid.major = element_blank(), panel.grid.minor = element_blank(),
            axis.title=element_text(size=12), legend.position="bottom"))

#Add a categorical indicator of group in Metadata
Metadata4$Metformine<-as.factor(ifelse(grepl("1", Metadata4$Metformin), "Yes",
                                       ifelse(grepl("0", Metadata4$Metformin),
                                               "No", "Unknown")))

#Order Treatment metformine for plotting
Metadata4$Metformine <- factor(Metadata4$Metformine, levels=c("Yes", "No", "Unknown"))
#Create PCoA for figure 1
if (i=="All") {
  PCoAall<-ggplot(Metadata4) +
    geom_point(aes(MDS1BrayHel, MDS2BrayHel, color = Diagnosis, #shape = Metformine,
                  group = Diagnosis), size=5) +
    stat_ellipse(aes(MDS1BrayHel, MDS2BrayHel, color = Diagnosis, group = Diagnosis)) +
    #stat_ellipse(aes(MDS1BrayHel, MDS2BrayHel, group = Metformine,
    #                 linetype=factor(Metadata4$Metformine)), alpha = 0.7) +
    scale_color_manual(values=c(Control = "#666666", T1D = "#1F78B4",
                                   T2D = "#33A02C", LADA = "#E31A1C")) +
    scale_shape_manual(values=c(3, 16)) +
    scale_linetype_manual(values=c("longdash", "dotted"), guide=FALSE) +
    #ggtitle(paste("PCoA", "LADA & T2D Metformin", sep=" ")) +
    labs(colour="Diagnosis", x = eig_1, y = eig_2) + #, shape="Metformin treatment"
    theme_bw() +
    theme(panel.grid.major = element_blank(), panel.grid.minor = element_blank(),
          axis.title=element_text(size=22), legend.position="bottom",
          legend.title=element_text(size=20), legend.text=element_text(size=20),
          axis.text.x = element_text(angle = 45, hjust = 1, size=12),
          axis.text.y = element_text(angle = 45, hjust = 1, size=12))

  print(PCoAall)
  pdf("MicroLADA_PCoAAllMetRemMet.pdf", width=9, height=6)
  print(PCoAall)
  dev.off()
  #Save plot in previous list
  Fig1ListRemMet[[ "PCoAall" ]] <- PCoAall
  #return(PCoAall)
}

```



```

}

##Stressplot
##Extract ordination distances and merge with observed dissimilarity
#stress<-stressplot(PCoAcsObject)
#df <- melt(as.matrix(stress))
#names(df)<-c("rowOrd", "colOrd", "OrdDist")
#df<-filter(df, OrdDist>0)
#df2 <- melt(as.matrix(distmatrix))
#names(df2)<-c("rowObs", "colObs", "ObsDism")
#df2<-filter(df2, ObsDism>0)
#df<-unite(df, mergecol, c(rowOrd, colOrd), remove=FALSE)
#df2<-unite(df2, mergecol, c(rowObs, colObs), remove=FALSE)
#ggstress<-merge(df, df2, by="mergecol")

##create stressplot
#print(ggplot(ggstress) +
#  geom_point(aes(ObsDism, OrdDist)) +
#  ggtitle(paste("Stressplot", i, sep=" ")) +
#  labs(x = "Observed dissimilarity", y = "Ordination distance") +
#  theme_bw() +
#  theme(panel.grid.major = element_blank(), panel.grid.minor = element_blank(),
#    axis.title=element_text(size=12)))

##Screeplot
#screeplot<-data.frame(PCoAcsObject$CA$eig)
#colnames(screeplot)<-c("eig")
#screeplot$eig <- screeplot$eig[1:length(screeplot$eig)] /
#  sum(screeplot$eig) * 100
#screeplot<-add_rownames(screeplot, "MDS")
#screeplot$MDS <- factor(screeplot$MDS,
#  levels=c(sprintf("MDS%d", 1:length(screeplot$eig))))

##create screeplot
#print(ggplot(screeplot, aes(x=MDS, y=eig)) +
#  geom_bar(stat="identity") +
#  labs(x ="MDS", y ="eig (%)") +
#  ggtitle(paste("Screeplot", i, sep=" ")) +
#  theme_bw() +
#  theme(panel.grid.major = element_blank(), panel.grid.minor = element_blank(),
#    axis.title=element_text(size=12), axis.text.x=element_blank(),
#    axis.ticks.x=element_blank()))
}

```

```
## [1] "LADAControl"
```

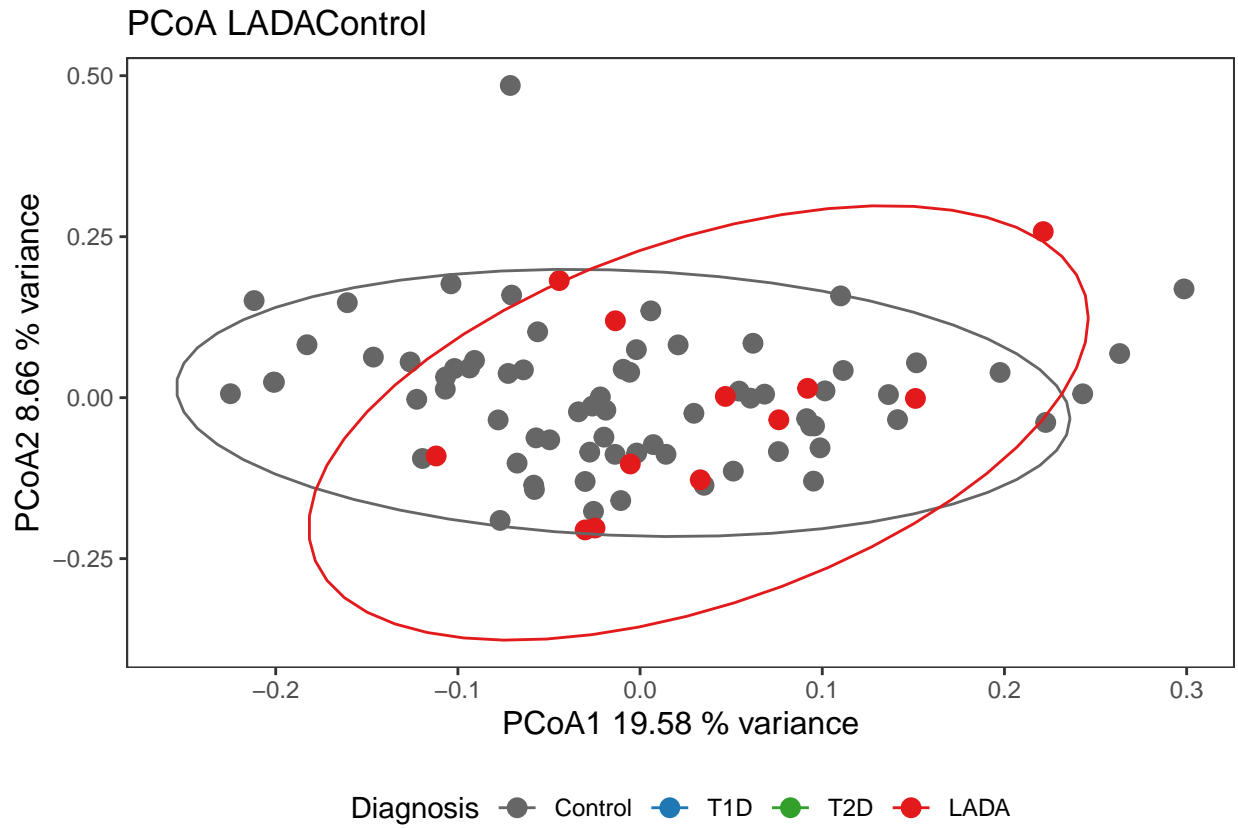

PCoA LADAControl

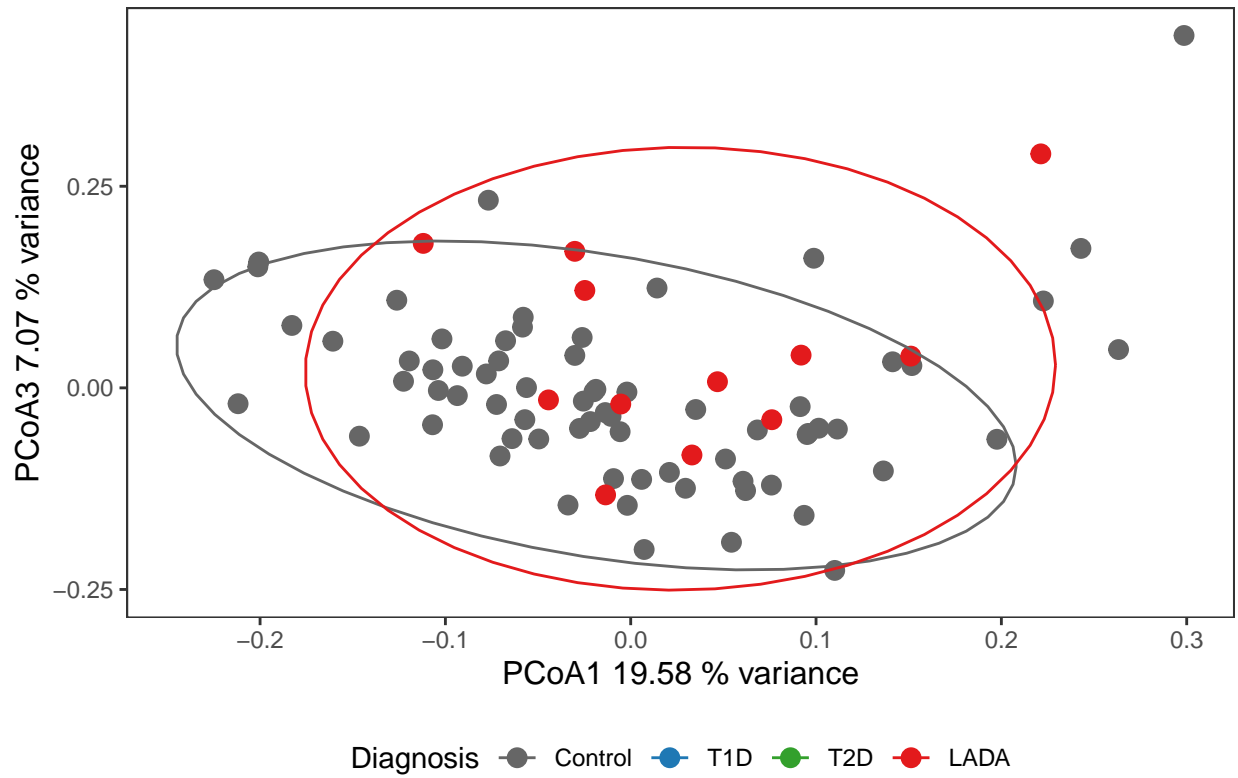

```
## [1] "LADAT1D"
```

PCoA LADAControl

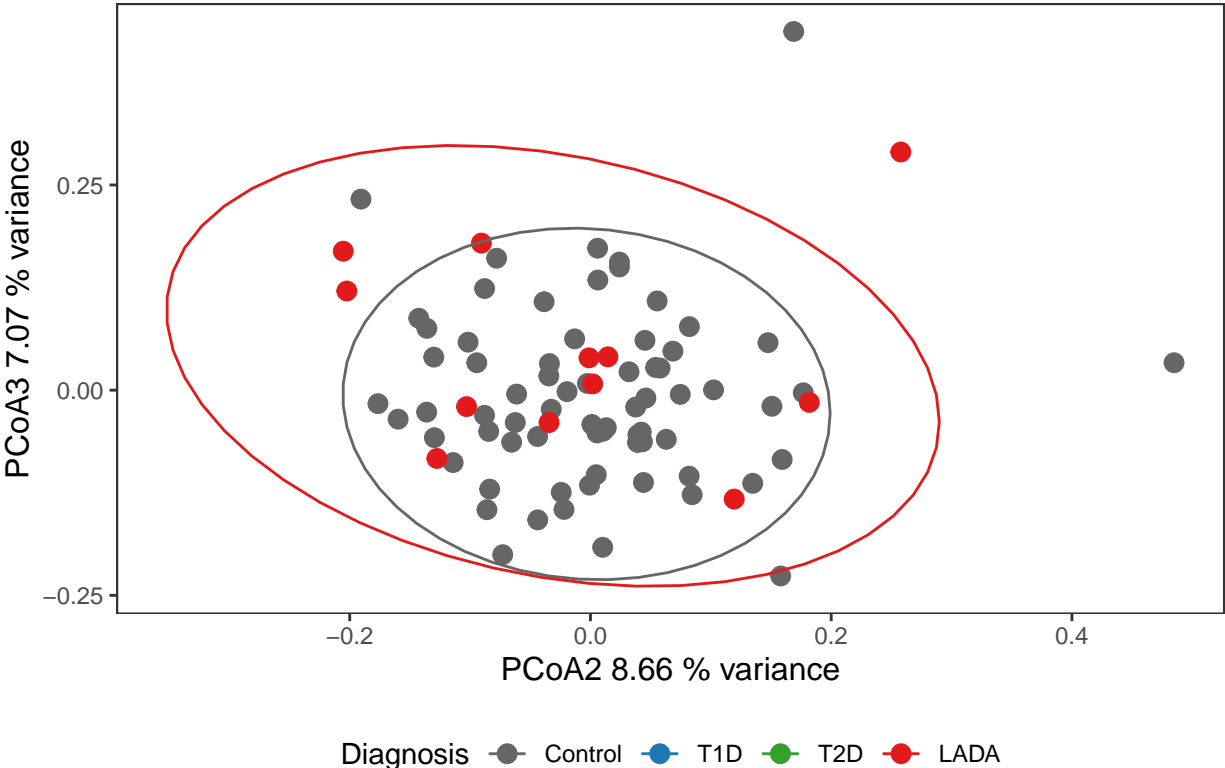

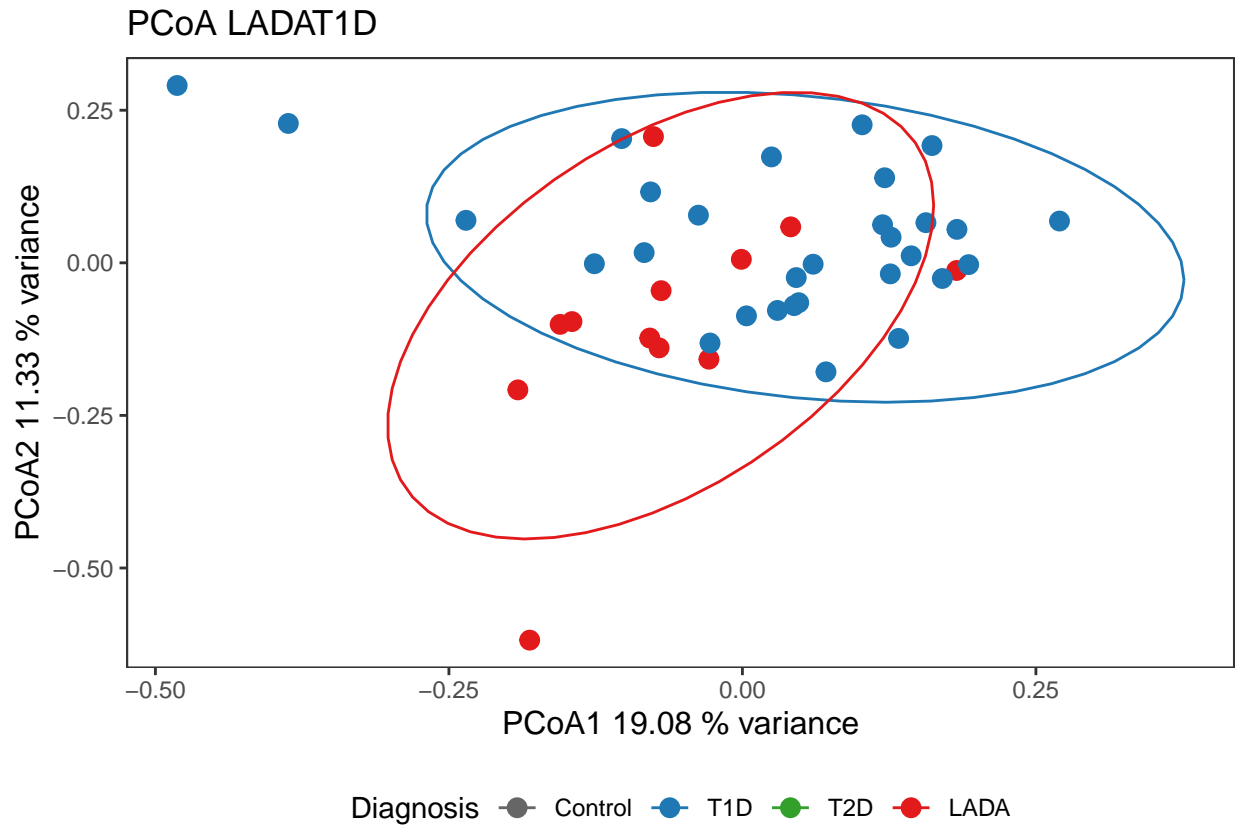

PCoA LADAT1D

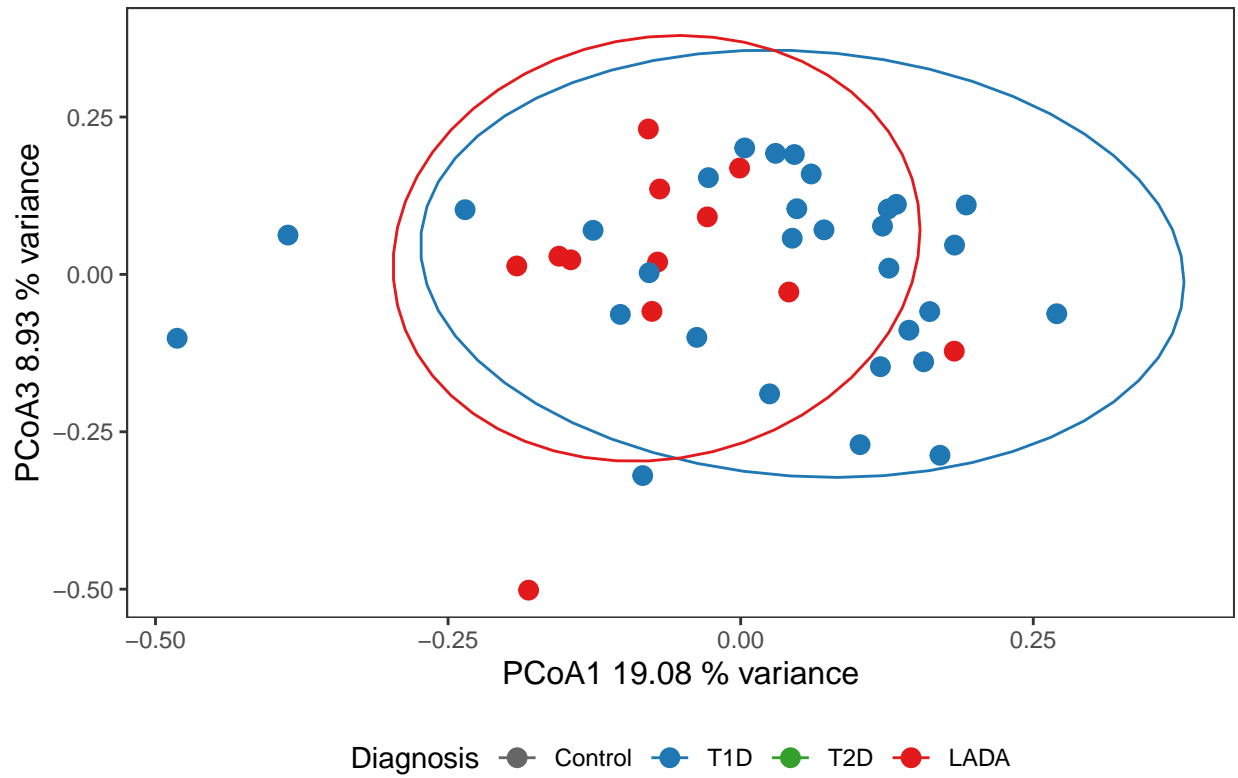

```
## [1] "LADAT2D"
```

PCoA LADAT1D

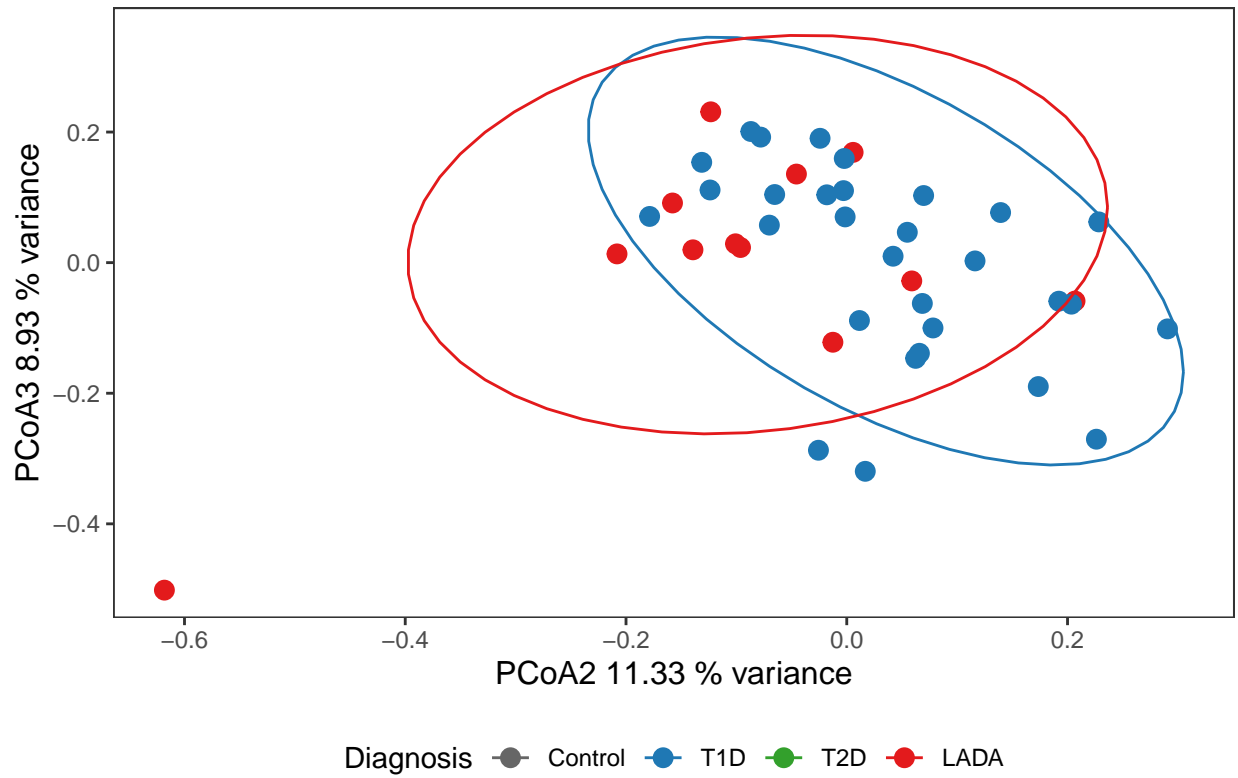

PCoA LADAT2D

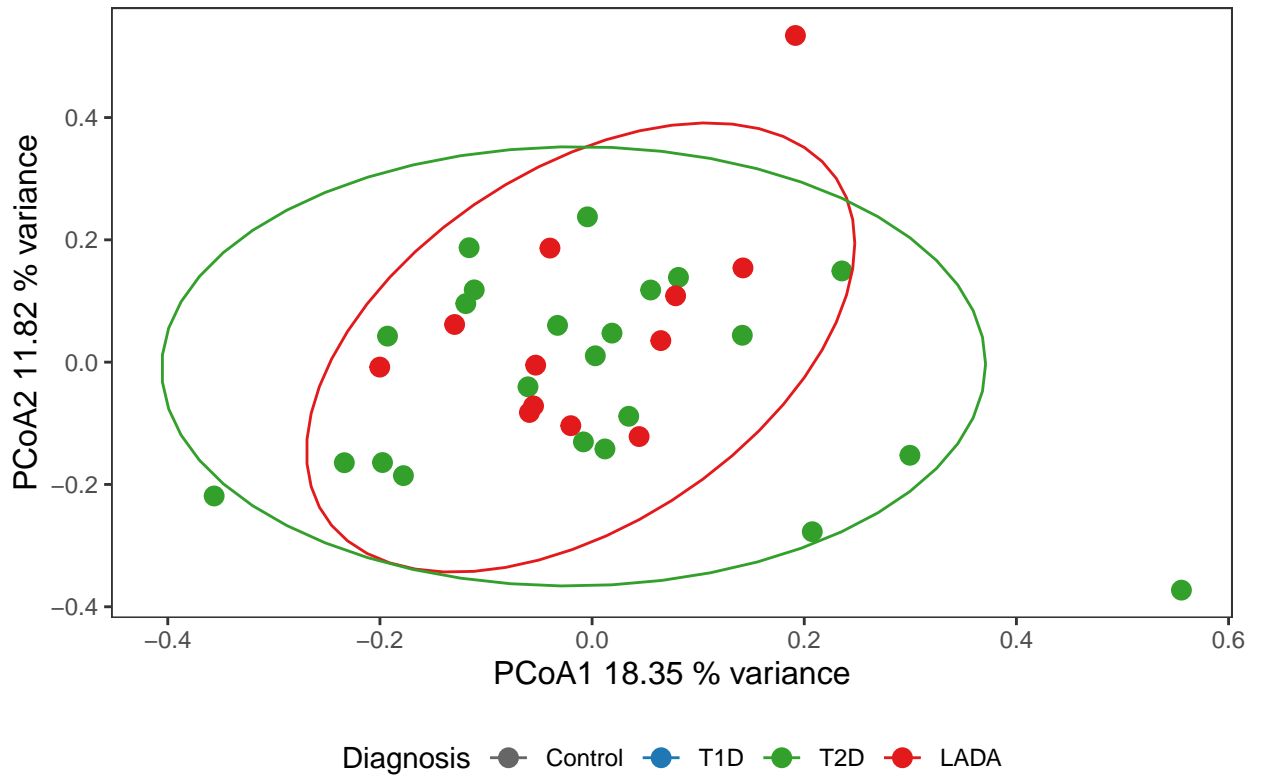



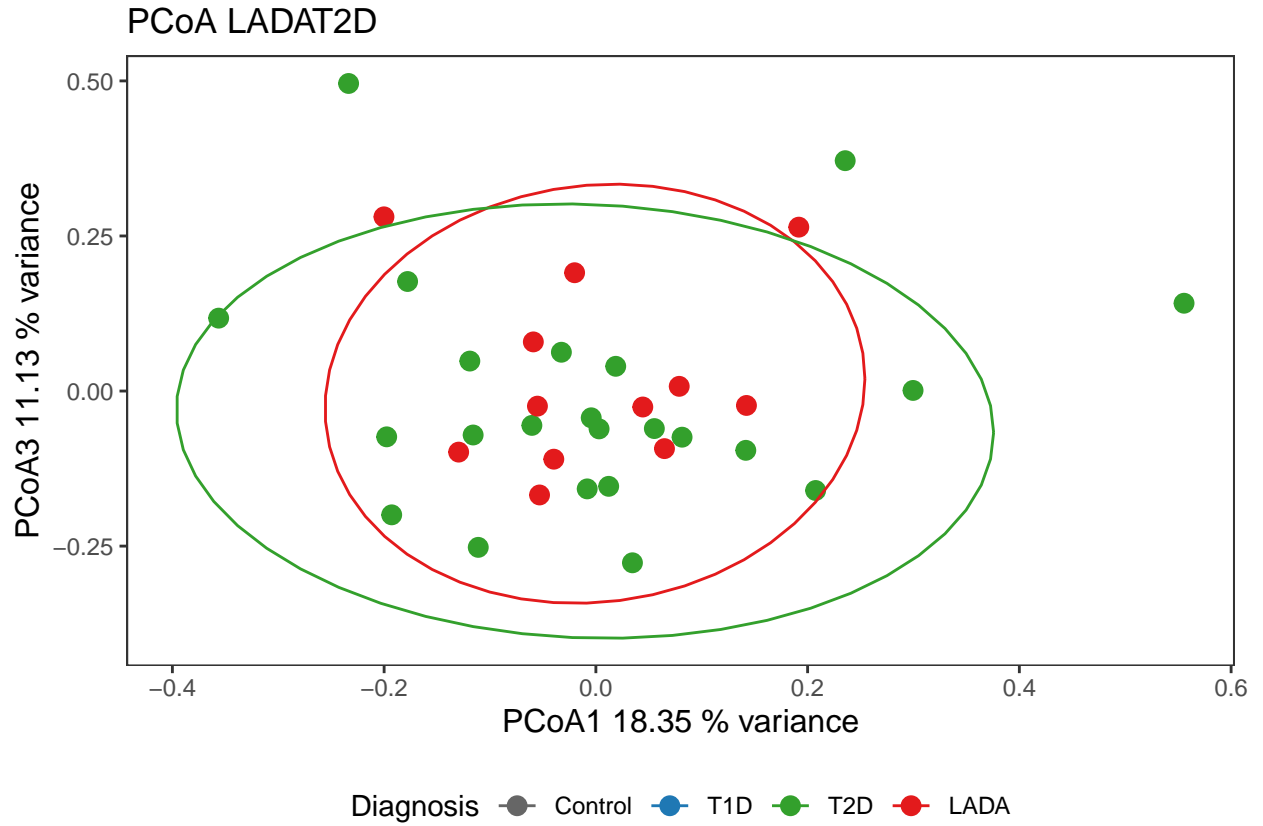

```
## [1] "All"
```

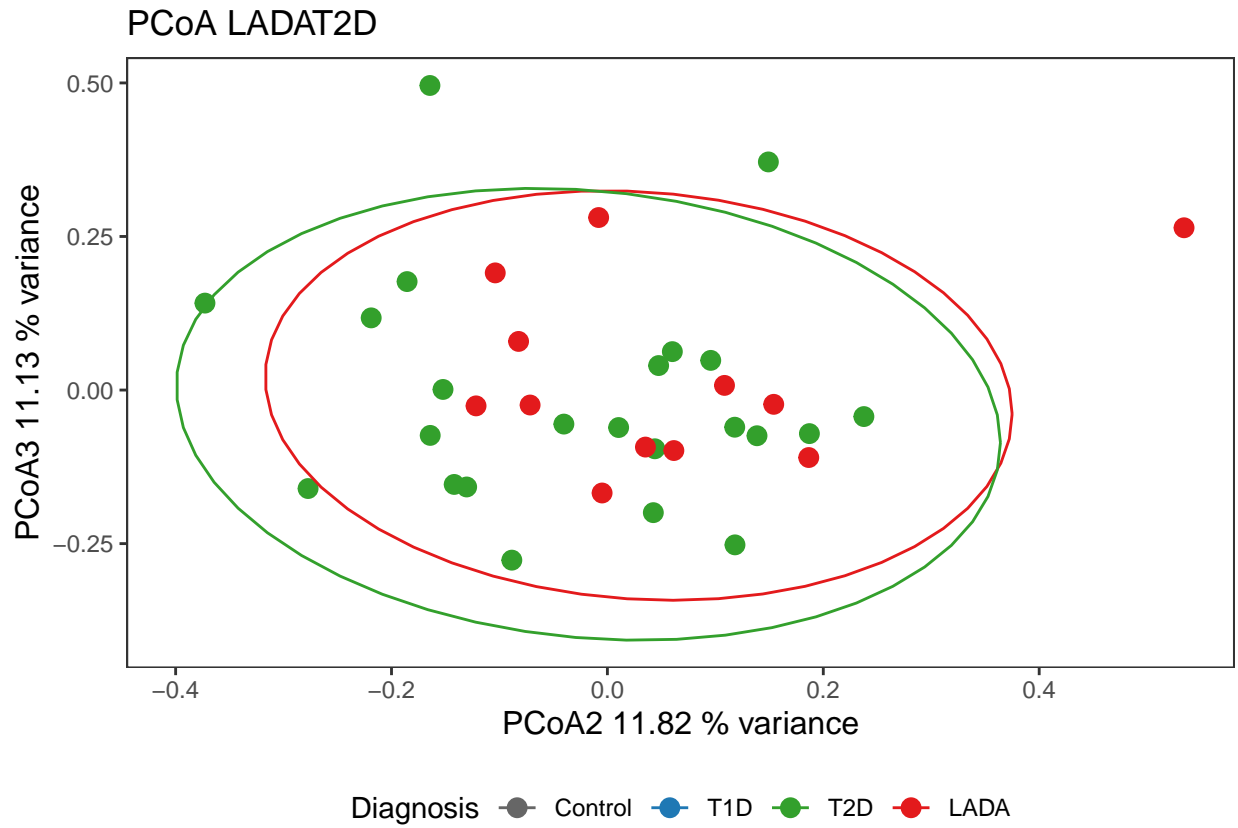

PCoA All

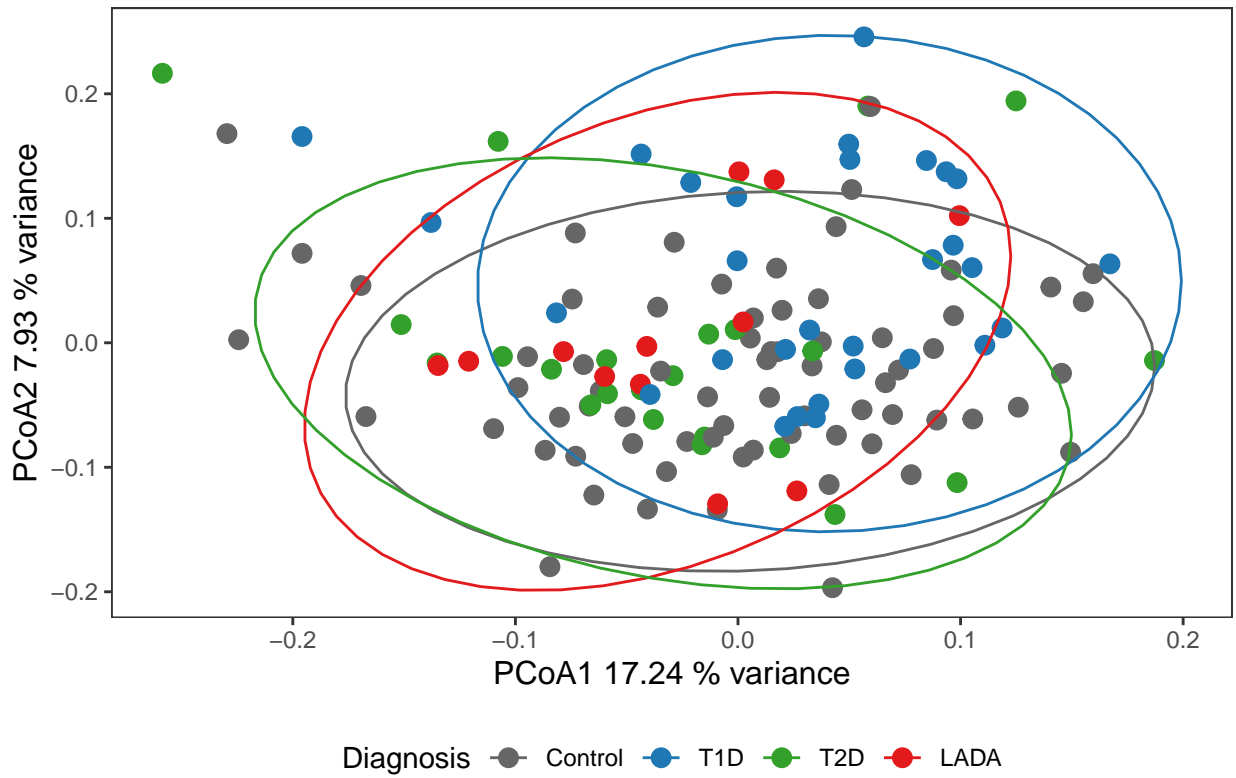

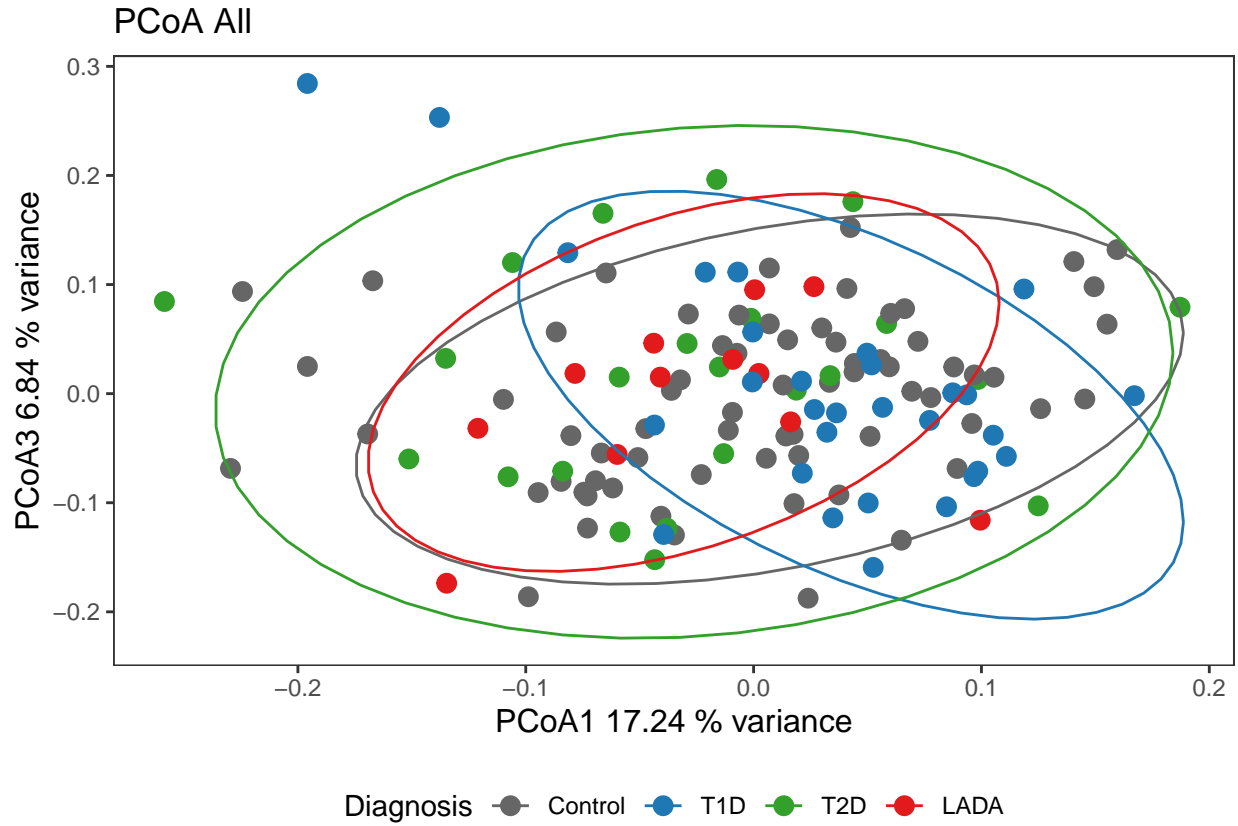

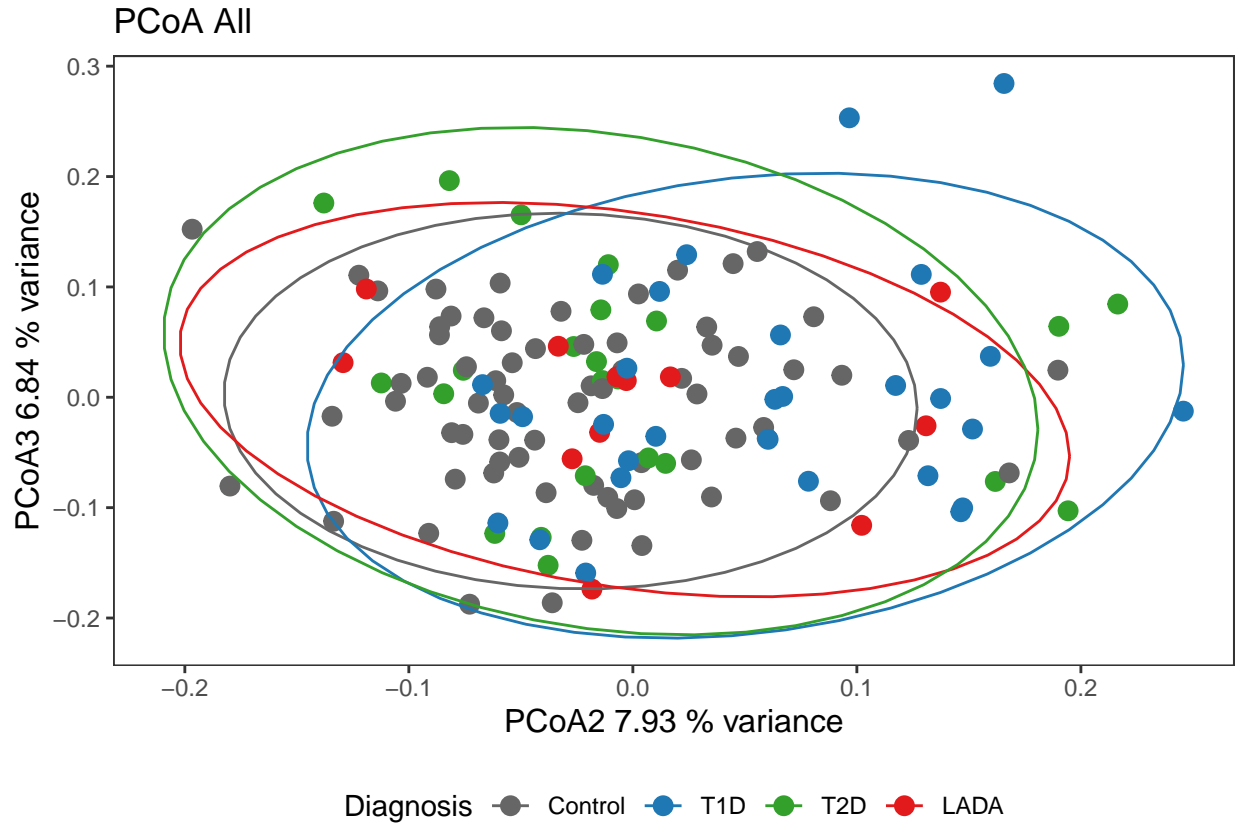

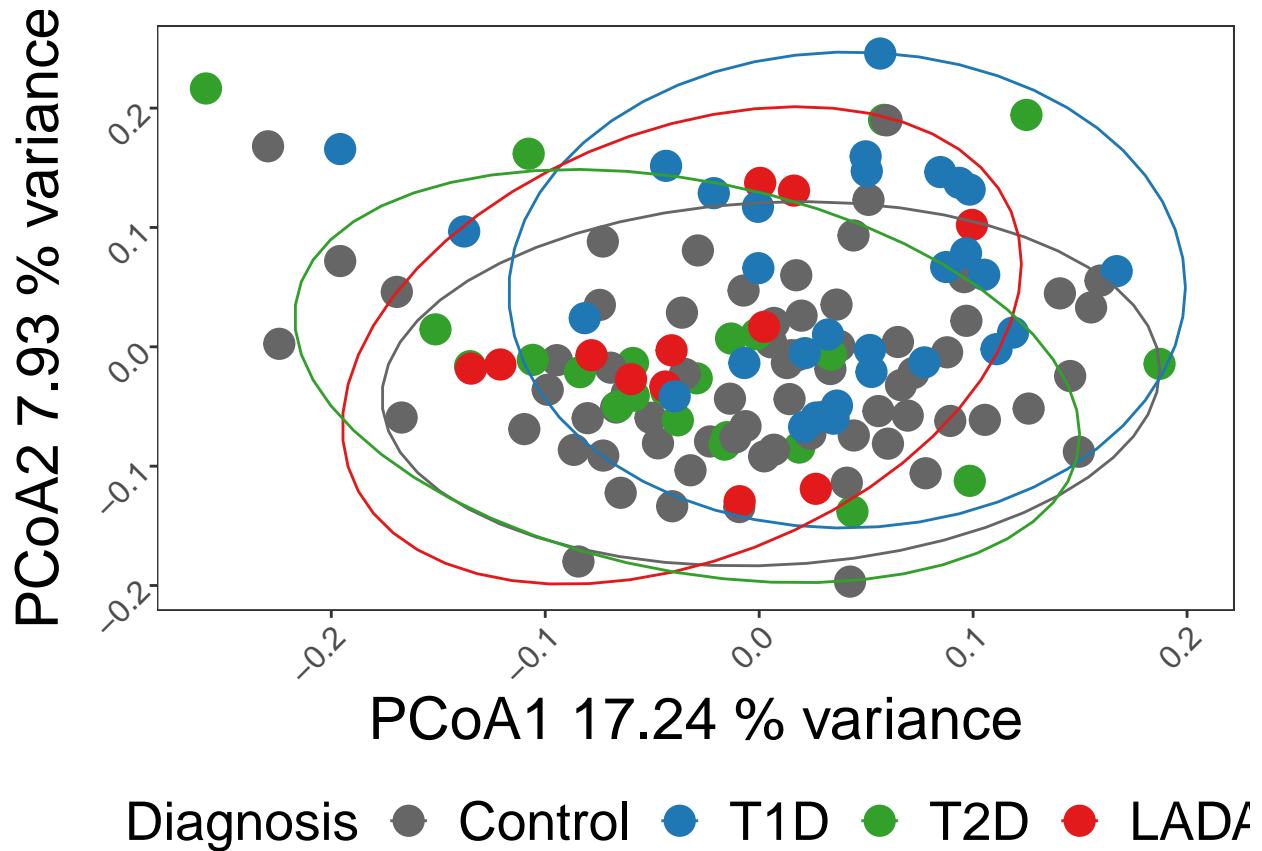

Create figure 1

Investigating grouping diagnosis. Which group does LADA resemble the most and which are different from each other.

```
#Have the plots stored in list
lay <- rbind(c(1,2,3,4),
             c(1,2,3,4),
             c(5,5,5,5),
             c(5,5,5,5))

pdf(paste("MicroLADA_Figure1.pdf", sep=""), width=15, height=15)
grid.arrange(Fig1List$Alpharichness,
             Fig1List$AlphaPielou,
             Fig1List$AlphaShannon,
             Fig1List$DissiBrayHel,
             Fig1List$PCoAall, layout_matrix = lay)

dev.off()
```

```
## pdf
## 2
```

```
pdf(paste("MicroLADA_Figure1RemMet.pdf", sep=""), width=15, height=15)
grid.arrange(Fig1ListRemMet$Alpharichness,
             Fig1ListRemMet$AlphaPielou,
             Fig1ListRemMet$AlphaShannon,
             Fig1ListRemMet$DissiBrayHel,
             Fig1ListRemMet$PCoAall, layout_matrix = lay)
dev.off()
```

```
## pdf
## 2
```

## PERMANOVA

Permutational Multivariate ANOVA based on dissimilarities (Bray-Curtis, Hellinger transformed data) using `vegan::adonis`  
 Added to figure 1 using inkscape.

```
rm(list=setdiff(ls(), c("Metadata", "MetadataMed", "Feature", "TaxonomyDA", "Taxonomy")))

#Hellinger transformation
Taxonomy2 <- data.frame(t(decostand(t(Taxonomy), method="hellinger")))
#Maks TSS
Taxonomy2<-sweep(Taxonomy2, 2, colSums(Taxonomy2), FUN="/")

#Dissimilarity
distmatrix <- vegdist(t(Taxonomy2), method="bray")

#adonis can handle both continous and factor predictors
set.seed(1)
adonisObject<-adonis2(distmatrix ~ Diagnosis, Metadata, by="terms",
                      perm=999) #, perm=999 can increase to get exact p-values
adonisObject #If significant then difference between groups

## Permutation test for adonis under reduced model
## Terms added sequentially (first to last)
## Permutation: free
## Number of permutations: 999
##
## adonis2(formula = distmatrix ~ Diagnosis, data = Metadata, permutations = 999, by = "terms")
##           Df SumOfSqs      R2      F Pr(>F)
## Diagnosis  3  1.1356 0.04669 3.6899  0.001 ***
## Residual 226 23.1839 0.95331
## Total    229 24.3195 1.00000
## ---
## Signif. codes:  0 '***' 0.001 '**' 0.01 '*' 0.05 '.' 0.1 ' ' 1

#With Metformin
set.seed(1)
adonisObject<-adonis2(distmatrix ~ Diagnosis + Metformin, Metadata, by="terms",
                      perm=999) #, perm=999 can increase to get exact p-values
adonisObject #If significant then difference between groups
```

```

## Permutation test for adonis under reduced model
## Terms added sequentially (first to last)
## Permutation: free
## Number of permutations: 999
##
## adonis2(formula = distmatrix ~ Diagnosis + Metformin, data = Metadata, permutations = 999, by = "terms")
##          Df SumOfSqs      R2      F Pr(>F)
## Diagnosis  3   1.1356 0.04669 3.7086 0.001 ***
## Metformin  1   0.2187 0.00899 2.1428 0.016 *
## Residual 225  22.9652 0.94431
## Total     229  24.3195 1.00000
## ---
## Signif. codes:  0 '***' 0.001 '**' 0.01 '*' 0.05 '.' 0.1 ' ' 1

```

```

set.seed(1)
adonisObject<-adonis2(distmatrix ~ Diagnosis * Metformin, Metadata, by="terms",
                      perm=999) #, perm=999 can increase to get exact p-values
adonisObject #If significant then difference between groups

```

```

## Permutation test for adonis under reduced model
## Terms added sequentially (first to last)
## Permutation: free
## Number of permutations: 999
##
## adonis2(formula = distmatrix ~ Diagnosis * Metformin, data = Metadata, permutations = 999, by = "terms")
##          Df SumOfSqs      R2      F Pr(>F)
## Diagnosis  3   1.1356 0.04669 3.7067 0.001 ***
## Metformin  1   0.2187 0.00899 2.1417 0.016 *
## Diagnosis:Metformin 1   0.0907 0.00373 0.8880 0.566
## Residual 224  22.8745 0.94058
## Total     229  24.3195 1.00000
## ---
## Signif. codes:  0 '***' 0.001 '**' 0.01 '*' 0.05 '.' 0.1 ' ' 1

```

```

#With Metformin first in the model formula
set.seed(1)
adonisObject<-adonis2(distmatrix ~ Metformin + Diagnosis, Metadata, by="terms",
                      perm=999) #, perm=999 can increase to get exact p-values
adonisObject #If significant then difference between groups

```

```

## Permutation test for adonis under reduced model
## Terms added sequentially (first to last)
## Permutation: free
## Number of permutations: 999
##
## adonis2(formula = distmatrix ~ Metformin + Diagnosis, data = Metadata, permutations = 999, by = "terms")
##          Df SumOfSqs      R2      F Pr(>F)
## Metformin  1   0.8017 0.03297 7.8551 0.001 ***
## Diagnosis  3   0.5525 0.02272 1.8045 0.008 **
## Residual 225  22.9652 0.94431
## Total     229  24.3195 1.00000
## ---
## Signif. codes:  0 '***' 0.001 '**' 0.01 '*' 0.05 '.' 0.1 ' ' 1

```



```

#Actual test reported in figure 1
#With by = margin does not matter the order
set.seed(1)
adonisObject<-adonis2(distmatrix ~ Metformin + Diagnosis, Metadata, by="margin",
                      perm=999) #, perm=999 can increase to get exact p-values
adonisObject #If significant then difference between groups

```

```

## Permutation test for adonis under reduced model
## Marginal effects of terms
## Permutation: free
## Number of permutations: 999
##
## adonis2(formula = distmatrix ~ Metformin + Diagnosis, data = Metadata, permutations = 999, by = "margin")
##      Df SumOfSqs      R2      F Pr(>F)
## Metformin  1  0.2187 0.00899  2.1428  0.016 *
## Diagnosis  3  0.5525 0.02272  1.8045  0.008 **
## Residual 225 22.9652 0.94431
## Total     229 24.3195 1.00000
## ---
## Signif. codes:  0 '***' 0.001 '**' 0.01 '*' 0.05 '.' 0.1 ' ' 1

```

```

#Include BMI
set.seed(1)
adonisObject<-adonis2(distmatrix ~ Metformin + Diagnosis + BMI, Metadata, by="margin",
                      perm=999) #, perm=999 can increase to get exact p-values
adonisObject #If significant then difference between groups

```

```

## Permutation test for adonis under reduced model
## Marginal effects of terms
## Permutation: free
## Number of permutations: 999
##
## adonis2(formula = distmatrix ~ Metformin + Diagnosis + BMI, data = Metadata, permutations = 999, by = "margin")
##      Df SumOfSqs      R2      F Pr(>F)
## Metformin  1  0.2173 0.00894  2.1314  0.016 *
## Diagnosis  3  0.5207 0.02141  1.7023  0.011 *
## BMI        1  0.1249 0.00514  1.2252  0.208
## Residual 224 22.8403 0.93918
## Total     229 24.3195 1.00000
## ---
## Signif. codes:  0 '***' 0.001 '**' 0.01 '*' 0.05 '.' 0.1 ' ' 1

```

```

set.seed(1)
adonisObject<-adonis2(distmatrix ~ Metformin + Diagnosis + BMIord, Metadata, by="margin",
                      perm=999) #, perm=999 can increase to get exact p-values
adonisObject #If significant then difference between groups

```

```

## Permutation test for adonis under reduced model
## Marginal effects of terms
## Permutation: free
## Number of permutations: 999
##

```

```
## adonis2(formula = distmatrix ~ Metformin + Diagnosis + BMIord, data = Metadata, permutations = 999, 1)
##           Df SumOfSqs      R2      F Pr(>F)
## Metformin  1   0.2115 0.00870 2.0647  0.018 *
## Diagnosis  3   0.5096 0.02095 1.6584  0.010 **
## BMIord     5   0.4329 0.01780 0.8454  0.816
## Residual  220  22.5323 0.92651
## Total     229  24.3195 1.00000
## ---
## Signif. codes:  0 '***' 0.001 '**' 0.01 '*' 0.05 '.' 0.1 ' ' 1
```

```
set.seed(1)
adonisObject<-adonis2(distmatrix ~ Metformin + Diagnosis + BMIclass, Metadata, by="margin",
                      perm=999) #, perm=999 can increase to get exact p-values
adonisObject #If significant then difference between groups
```

```
## Permutation test for adonis under reduced model
## Marginal effects of terms
## Permutation: free
## Number of permutations: 999
##
## adonis2(formula = distmatrix ~ Metformin + Diagnosis + BMIclass, data = Metadata, permutations = 999)
##           Df SumOfSqs      R2      F Pr(>F)
## Metformin  1   0.2145 0.00882 2.1015  0.017 *
## Diagnosis  3   0.5260 0.02163 1.7174  0.009 **
## BMIclass   2   0.1987 0.00817 0.9730  0.496
## Residual  223  22.7666 0.93614
## Total     229  24.3195 1.00000
## ---
## Signif. codes:  0 '***' 0.001 '**' 0.01 '*' 0.05 '.' 0.1 ' ' 1
```

```
#set.seed(1)
#adonisObject<-adonis2(distmatrix ~ Metformin + Diagnosis + BMIordclass, Metadata, by="margin",
#                      perm=999) #, perm=999 can increase to get exact p-values
#adonisObject #If significant then difference between groups same ass BMIclass
```

```
set.seed(1)
adonisObject<-adonis2(distmatrix ~ Metformin + Diagnosis + BMIq, Metadata, by="margin",
                      perm=999) #, perm=999 can increase to get exact p-values
adonisObject #If significant then difference between groups
```

```
## Permutation test for adonis under reduced model
## Marginal effects of terms
## Permutation: free
## Number of permutations: 999
##
## adonis2(formula = distmatrix ~ Metformin + Diagnosis + BMIq, data = Metadata, permutations = 999, by)
##           Df SumOfSqs      R2      F Pr(>F)
## Metformin  1   0.2174 0.00894 2.1309  0.016 *
## Diagnosis  3   0.5321 0.02188 1.7384  0.009 **
## BMIq       1   0.1129 0.00464 1.1068  0.294
## Residual  224  22.8523 0.93967
## Total     229  24.3195 1.00000
## ---
## Signif. codes:  0 '***' 0.001 '**' 0.01 '*' 0.05 '.' 0.1 ' ' 1
```

```

set.seed(1)
adonisObject<-adonis2(distmatrix ~ Metformin * Diagnosis * BMIq, Metadata, by="margin",
                      perm=999) #, perm=999 can increase to get exact p-values
adonisObject #If significant then difference between groups

```

```

## Permutation test for adonis under reduced model
## Marginal effects of terms
## Permutation: free
## Number of permutations: 999
##
## adonis2(formula = distmatrix ~ Metformin * Diagnosis * BMIq, data = Metadata, permutations = 999, by
##
##           Df SumOfSqs      R2      F Pr(>F)
## Metformin:Diagnosis:BMIq  1  0.0744 0.00306 0.7278 0.775
## Residual                 218 22.2849 0.91634
## Total                    229 24.3195 1.00000

```

```

set.seed(1)
adonisObject<-adonis2(distmatrix ~ Diagnosis + BMIq, Metadata, by="margin",
                      perm=999) #, perm=999 can increase to get exact p-values
adonisObject #If significant then difference between groups

```

```

## Permutation test for adonis under reduced model
## Marginal effects of terms
## Permutation: free
## Number of permutations: 999
##
## adonis2(formula = distmatrix ~ Diagnosis + BMIq, data = Metadata, permutations = 999, by = "margin")
##           Df SumOfSqs      R2      F Pr(>F)
## Diagnosis   3  0.9694 0.03986 3.1514 0.001 ***
## BMIq        1  0.1142 0.00470 1.1141 0.288
## Residual   225 23.0697 0.94861
## Total     229 24.3195 1.00000
## ---
## Signif. codes:  0 '***' 0.001 '**' 0.01 '*' 0.05 '.' 0.1 ' ' 1

```

```

## Evaluating the model assumptions
TestModel <- with(Metadata, betadisper(distmatrix, Diagnosis)) #Can not run
#betadisper with multiple independant variables
#TestModel
#plot(TestModel)
plot(TestModel, label=FALSE)

```

### TestModel

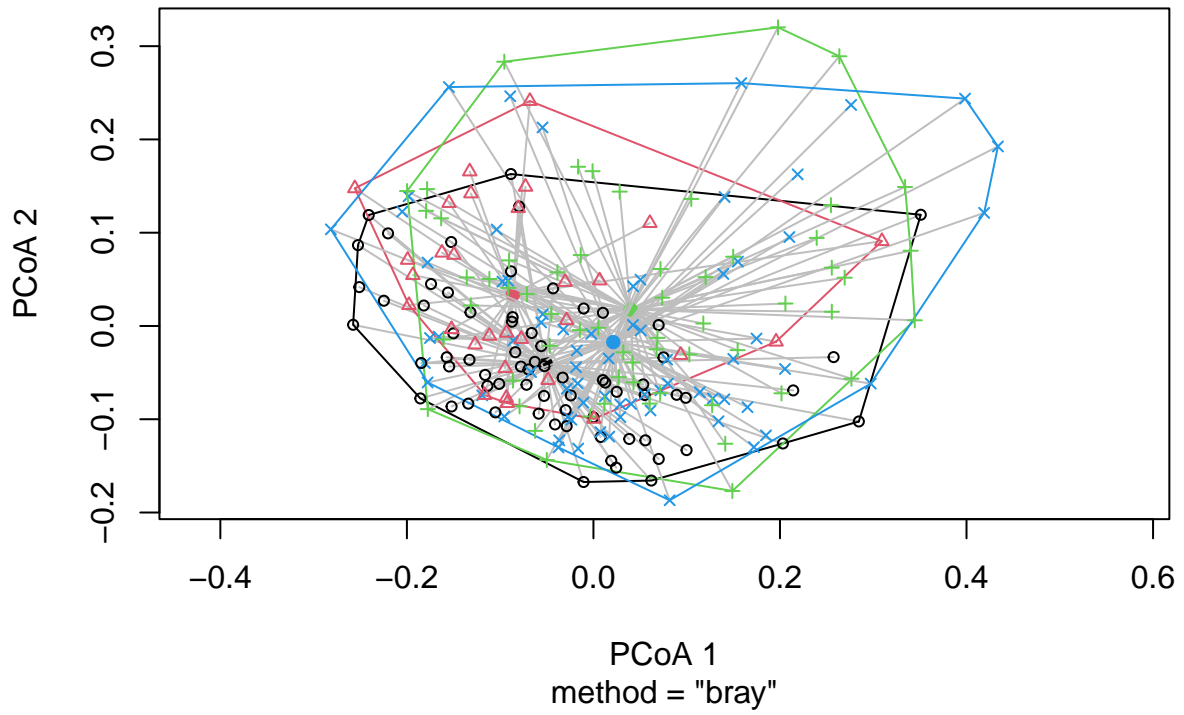

```
boxplot(TestModel)
```

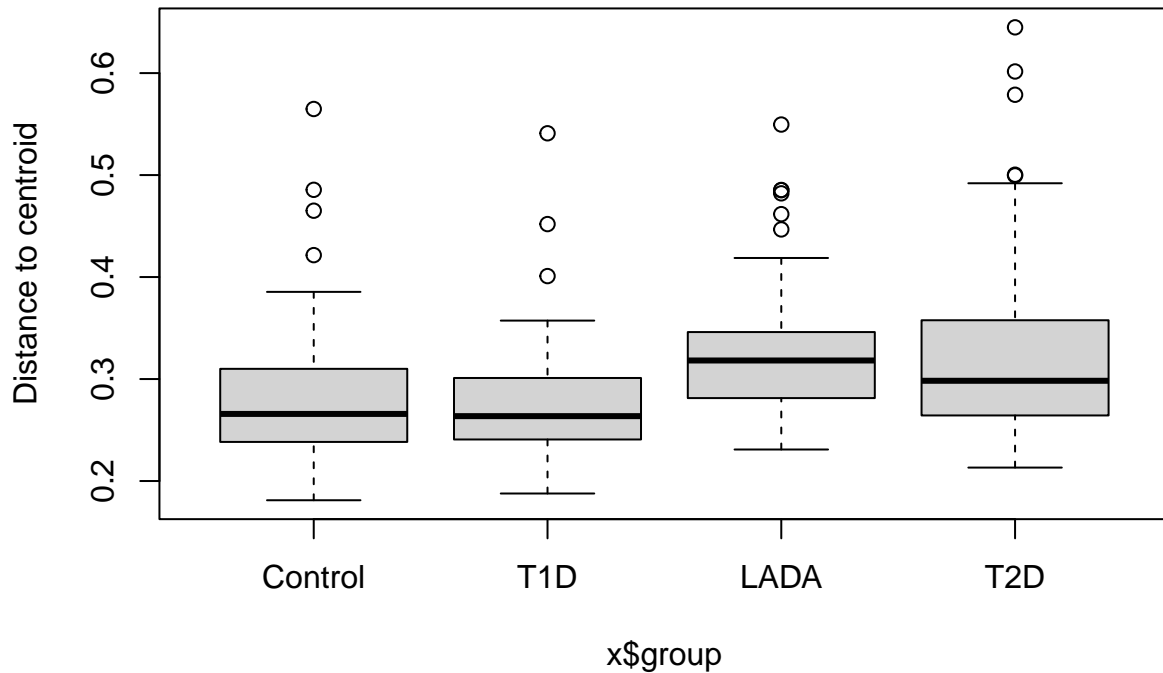

```
anova(TestModel) #p>0.05 -> Assumption met
```

```
## Analysis of Variance Table
##
## Response: Distances
##          Df Sum Sq Mean Sq F value    Pr(>F)
## Groups      3 0.11234  0.037446   6.2162 0.0004486 ***
## Residuals 226 1.36141  0.006024
## ---
## Signif. codes:  0 '***' 0.001 '**' 0.01 '*' 0.05 '.' 0.1 ' ' 1
```

```
#permutest(TestModel)
```

```
table(Metadata$Metformin, Metadata$Diagnosis)
```

```
##
##      Control T1D LADA T2D
## 0         70  30  12  23
## 1          0   0  48  47
```

PERMANOVA remove metformin

```

rm(list=setdiff(ls(), c("Metadata", "MetadataMed", "Feature", "TaxonomyDA", "Taxonomy")))

##Removing treated with metformin
#Metadata$Metformin <- ifelse(is.na(Metadata$Metformin), "Unknow", Metadata$Metformin)
Metadata2<-filter(Metadata, !Metformin == 1)
##Applying subsetting to OTU tables
Taxonomy2<-dplyr::select(Taxonomy, one_of(as.character(Metadata2$MicrobiomeID)))
##Remove orgs that are not present after subsetting.
Taxonomy2 <- Taxonomy2[rowSums(Taxonomy2)>0,]

##Hellinger transformation
Taxonomy2 <- data.frame(t(decostand(t(Taxonomy2), method="hellinger")))
##Maks TSS
Taxonomy2<-sweep(Taxonomy2, 2, colSums(Taxonomy2), FUN="/")

##Dissimilarity
distmatrix <- vegdist(t(Taxonomy2), method="bray")

set.seed(1)
adonisObject<-adonis2(distmatrix ~ Diagnosis, Metadata2, by="margin",
                      perm=999) #, perm=999 can increase to get exact p-values
adonisObject #If significant then difference between groups

```

```

## Permutation test for adonis under NA model
## Marginal effects of terms
## Permutation: free
## Number of permutations: 999
##
## adonis2(formula = distmatrix ~ Diagnosis, data = Metadata2, permutations = 999, by = "margin")
##           Df SumOfSqs      R2      F Pr(>F)
## Diagnosis   3   0.5289 0.04185 1.9072  0.001 ***
## Residual  131  12.1109 0.95815
## Total      134  12.6399 1.00000
## ---
## Signif. codes:  0 '***' 0.001 '**' 0.01 '*' 0.05 '.' 0.1 ' ' 1

```

```

set.seed(1)
adonisObject<-adonis2(distmatrix ~ Diagnosis + BMIq, Metadata2, by="margin",
                      perm=999) #, perm=999 can increase to get exact p-values
adonisObject #If significant then difference between groups

```

```

## Permutation test for adonis under reduced model
## Marginal effects of terms
## Permutation: free
## Number of permutations: 999
##
## adonis2(formula = distmatrix ~ Diagnosis + BMIq, data = Metadata2, permutations = 999, by = "margin")
##           Df SumOfSqs      R2      F Pr(>F)
## Diagnosis   3   0.4900 0.03876 1.7652  0.004 **
## BMIq        1   0.0827 0.00654 0.8935  0.539
## Residual  130  12.0282 0.95161

```

```
## Total      134  12.6399 1.00000
## ---
## Signif. codes:  0 '***' 0.001 '**' 0.01 '*' 0.05 '.' 0.1 ' ' 1
```

```
## Evaluating the model assumptions
```

```
TestModel <- with(Metadatas, betadisper(distmatrix, Diagnosis)) #Can not run
```

```
#betadisper with multiple independant variables
```

```
#TestModel
```

```
#plot(TestModel)
```

```
plot(TestModel, label=FALSE)
```

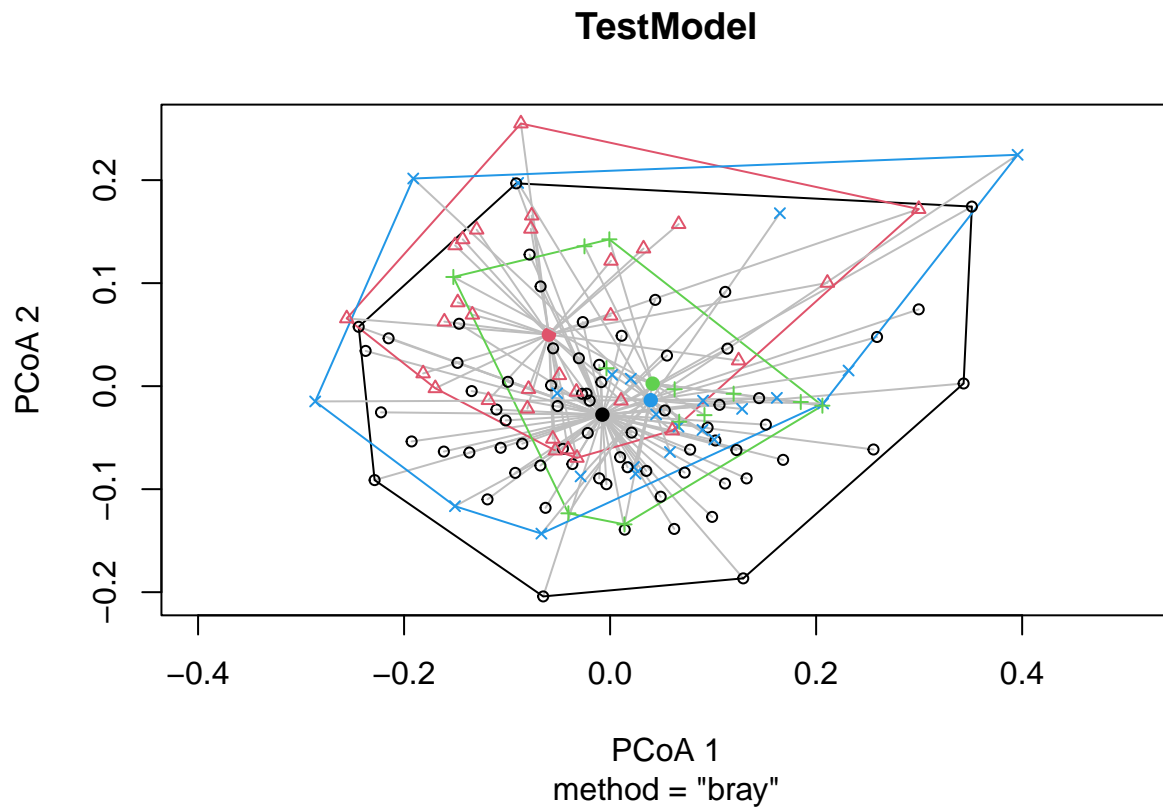

```
boxplot(TestModel)
```

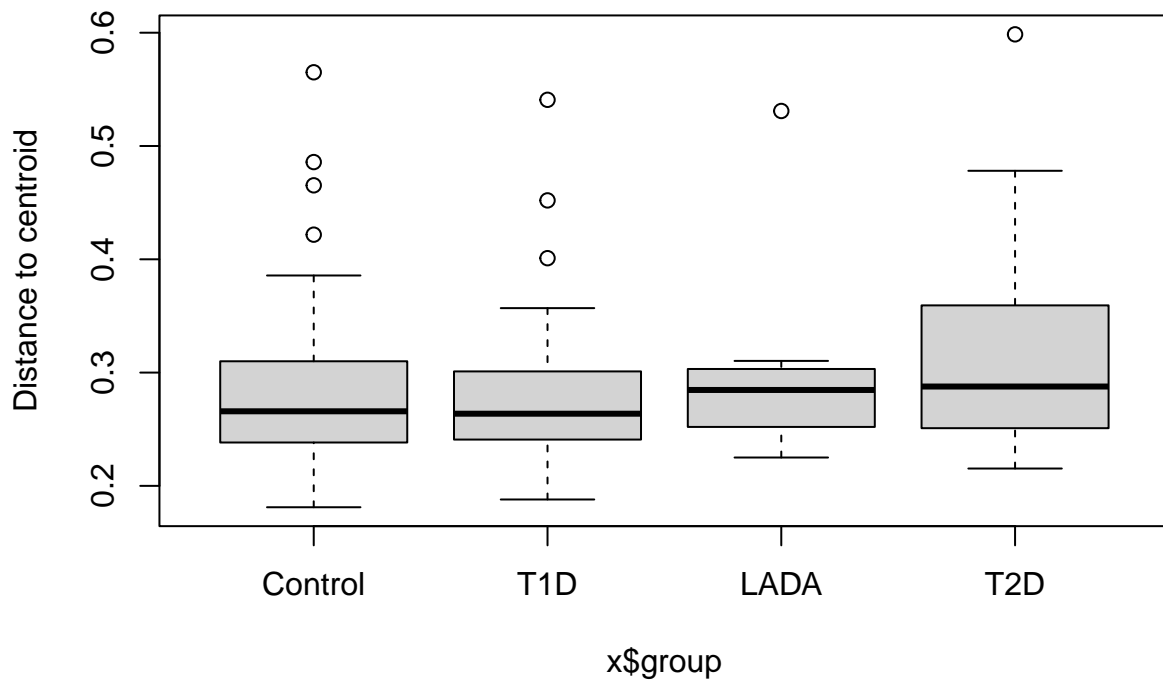

```
anova(TestModel) #p>0.05 -> Assumption met
```

```
## Analysis of Variance Table
##
## Response: Distances
##          Df Sum Sq Mean Sq F value Pr(>F)
## Groups    3  0.02961  0.0098715    1.74  0.162
## Residuals 131  0.74318  0.0056732
```

```
#permutest(TestModel)
```

```
table(Metadata2$Metformin, Metadata2$Diagnosis)
```

```
##
##      Control T1D LADA T2D
## 0         70  30  12  23
```

PERMANOVA MED subset

```
rm(list=setdiff(ls(), c("Metadata", "MetadataMed", "Feature", "TaxonomyDA", "Taxonomy")))
```

```
##Metadatamed
```



```
##Applying subsetting to OTU tables
Taxonomy2<-dplyr::select(Taxonomy, one_of(as.character(MetadataMed$MicrobiomeID)))
```

```
#Hellinger transformation
```

```
Taxonomy2 <- data.frame(t(decostand(t(Taxonomy2), method="hellinger")))
```

```
#Maks TSS
```

```
Taxonomy2<-sweep(Taxonomy2, 2, colSums(Taxonomy2), FUN="/")
```

```
#Dissimilarity
```

```
distmatrix <- vegdist(t(Taxonomy2), method="bray")
```

```
#With by = margin does not matter the order
```

```
set.seed(1)
```

```
adonisObject<-adonis2(distmatrix ~ Diagnosis + BMIq, MetadataMed, by="margin",  
perm=999) #, perm=999 can increase to get exact p-values
```

```
adonisObject #If significant then difference between groups
```

```
## Permutation test for adonis under reduced model
```

```
## Marginal effects of terms
```

```
## Permutation: free
```

```
## Number of permutations: 999
```

```
##
```

```
## adonis2(formula = distmatrix ~ Diagnosis + BMIq, data = MetadataMed, permutations = 999, by = "margin")
```

```
##          Df SumOfSqs      R2      F Pr(>F)
```

```
## Diagnosis  2  0.6507 0.03616 2.9590 0.001 ***
```

```
## BMIq       1  0.1426 0.00793 1.2969 0.174
```

```
## Residual 156 17.1534 0.95328
```

```
## Total    159 17.9940 1.00000
```

```
## ---
```

```
## Signif. codes:  0 '***' 0.001 '**' 0.01 '*' 0.05 '.' 0.1 ' ' 1
```

```
set.seed(1)
```

```
adonisObject<-adonis2(distmatrix ~ Metformin + Diagnosis, MetadataMed, by="margin",  
perm=999) #, perm=999 can increase to get exact p-values
```

```
adonisObject #If significant then difference between groups
```

```
## Permutation test for adonis under reduced model
```

```
## Marginal effects of terms
```

```
## Permutation: free
```

```
## Number of permutations: 999
```

```
##
```

```
## adonis2(formula = distmatrix ~ Metformin + Diagnosis, data = MetadataMed, permutations = 999, by = "margin")
```

```
##          Df SumOfSqs      R2      F Pr(>F)
```

```
## Metformin  1  0.2187 0.01215 1.9979 0.020 *
```

```
## Diagnosis  2  0.4030 0.02240 1.8406 0.011 *
```

```
## Residual 156 17.0773 0.94905
```

```
## Total    159 17.9940 1.00000
```

```
## ---
```

```
## Signif. codes:  0 '***' 0.001 '**' 0.01 '*' 0.05 '.' 0.1 ' ' 1
```

```
set.seed(1)
```

```
adonisObject<-adonis2(distmatrix ~ Diagnosis + Metformin + BMIq , MetadataMed, by="margin",
```

```
perm=999) #, perm=999 can increase to get exact p-values
adonisObject #If significant then difference between groups
```

```
## Permutation test for adonis under reduced model
## Marginal effects of terms
## Permutation: free
## Number of permutations: 999
##
## adonis2(formula = distmatrix ~ Diagnosis + Metformin + BMIq, data = MetadataMed, permutations = 999,
##          Df SumOfSqs      R2      F Pr(>F)
## Diagnosis  2  0.4018 0.02233 1.8390 0.011 *
## Metformin  1  0.2218 0.01233 2.0304 0.018 *
## BMIq       1  0.1457 0.00810 1.3337 0.154
## Residual 155 16.9316 0.94096
## Total     159 17.9940 1.00000
## ---
## Signif. codes:  0 '***' 0.001 '**' 0.01 '*' 0.05 '.' 0.1 ' ' 1
```

```
set.seed(1)
adonisObject<-adonis2(distmatrix ~ Diagnosis + Metformin + BMIq + med_insulin + med_statins + med_protonpump_inhibitor, data = MetadataMed, permutations = 999,
perm=999) #, perm=999 can increase to get exact p-values
adonisObject #If significant then difference between groups
```

```
## Permutation test for adonis under reduced model
## Marginal effects of terms
## Permutation: free
## Number of permutations: 999
##
## adonis2(formula = distmatrix ~ Diagnosis + Metformin + BMIq + med_insulin + med_statins + med_protonpump_inhibitor, data = MetadataMed, permutations = 999,
##          Df SumOfSqs      R2      F Pr(>F)
## Diagnosis  2  0.3261 0.01812 1.4917 0.052 .
## Metformin  1  0.1940 0.01078 1.7742 0.038 *
## BMIq       1  0.1436 0.00798 1.3136 0.160
## med_insulin 1  0.0934 0.00519 0.8545 0.607
## med_statins 1  0.1179 0.00655 1.0784 0.308
## med_protonpump_inhibitor 1  0.0980 0.00545 0.8964 0.553
## Residual 152 16.6159 0.92341
## Total     159 17.9940 1.00000
## ---
## Signif. codes:  0 '***' 0.001 '**' 0.01 '*' 0.05 '.' 0.1 ' ' 1
```

```
## Evaluating the model assumptions
TestModel <- with(MetadataMed, betadisper(distmatrix, Diagnosis)) #Can not run
#betadisper with multiple independant variables
#TestModel
#plot(TestModel)
plot(TestModel, label=FALSE)
```

# TestModel

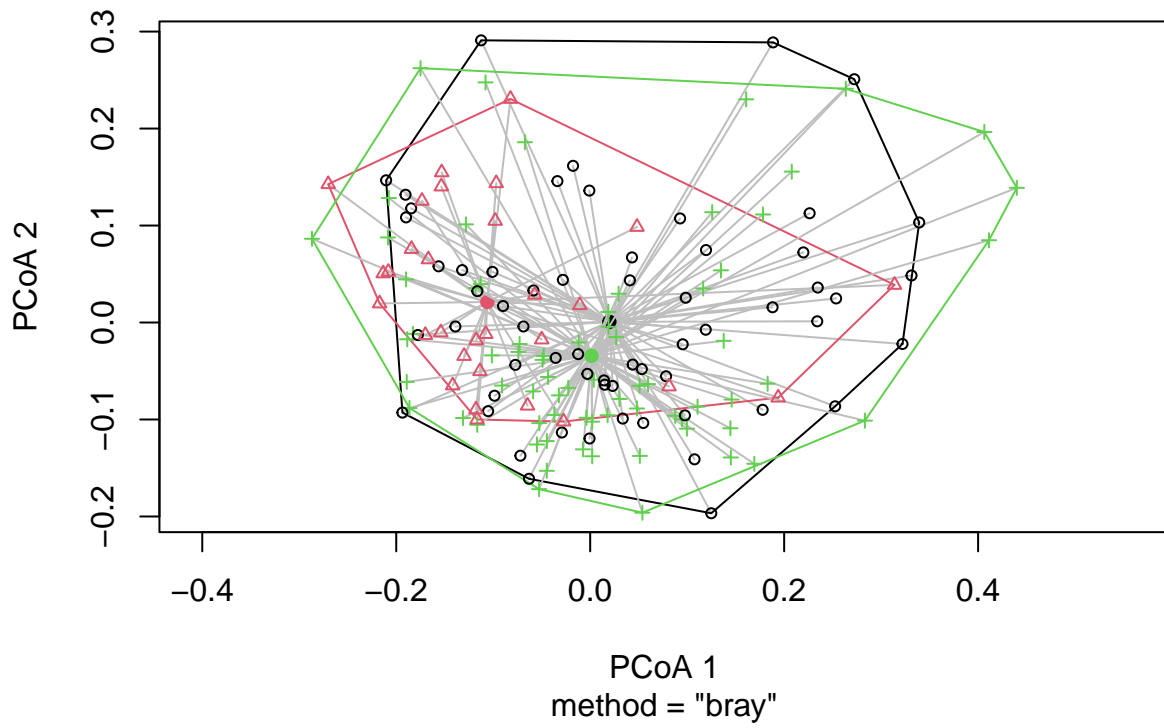

```
boxplot(TestModel)
```

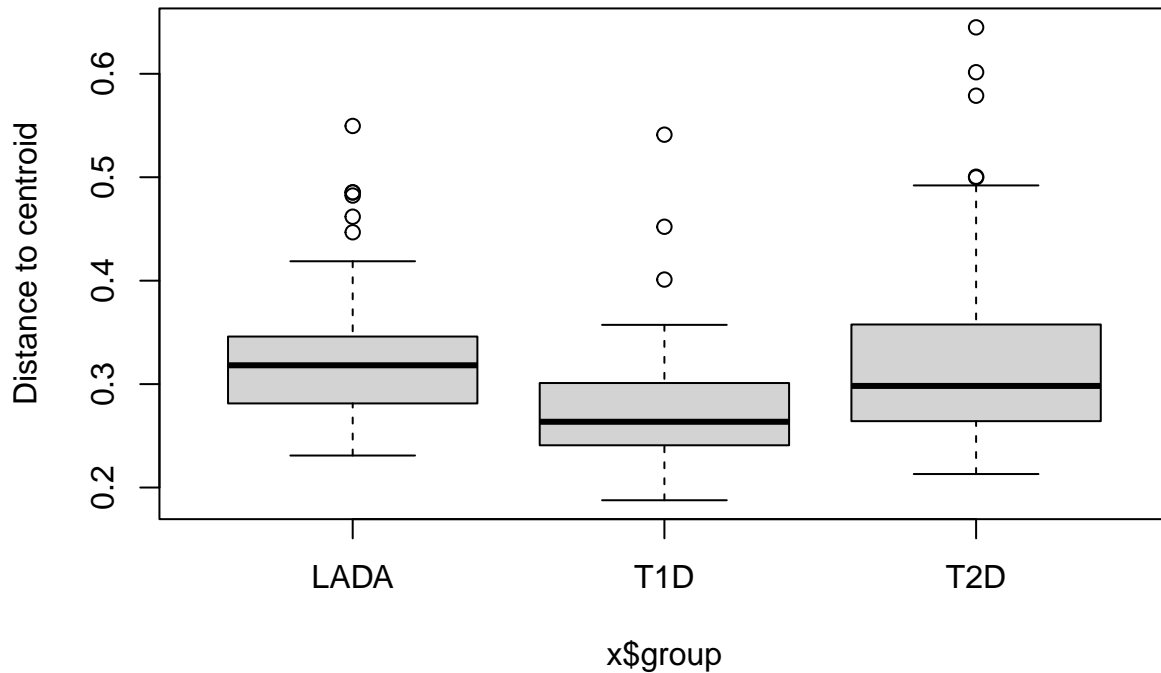

```
anova(TestModel) #p>0.05 -> Assumption met
```

```
## Analysis of Variance Table
##
## Response: Distances
##          Df Sum Sq Mean Sq F value Pr(>F)
## Groups      2  0.04655  0.0232754   3.5285  0.0317 *
## Residuals 157  1.03563  0.0065964
## ---
## Signif. codes:  0 '***' 0.001 '**' 0.01 '*' 0.05 '.' 0.1 ' ' 1
```

```
#permutest(TestModel)
```

### Pairwise PERMANOVA

Pairwise adonis, found this function from Pedro Martinez Arbizu on researchgate ([https://www.researchgate.net/post/How\\_can\\_I\\_do\\_PerMANOVA\\_pairwise\\_contrasts\\_in\\_R](https://www.researchgate.net/post/How_can_I_do_PerMANOVA_pairwise_contrasts_in_R)) He also made implementation of adonis2 <https://github.com/pmartinezarbizu/pairwiseAdonis>

```
rm(list=setdiff(ls(), c("Metadata", "MetadataMed", "Feature", "TaxonomyDA", "Taxonomy")))
##Initial normalization/transformation the function runs method from adonis passed from
##vegdist
##Hellinger transformation
```

```

Taxonomy2 <- data.frame(t(decostand(t(Taxonomy), method="hellinger")))
#Maks TSS
Taxonomy2<-sweep(Taxonomy2, 2, colSums(Taxonomy2), FUN="/")

##Testing function
#x <- t(Taxonomy2)
#factors <- as.character(Metadata$Diagnosis)
#sim.method <- 'bray'
#p.adjust.m <- 'bonferroni'
#elem<-1

pairwise.adonis <- function(x, factors, sim.method = 'bray', p.adjust.m = 'bonferroni')
#x = the community table
#factors = a column or vector with all factors to be tested pairwise
#sim.method = similarity function, one of the functions available in vegdist(); default is
#'bray' for bray-curtis.
#p.adjust.m = the p.value correction method, one of the methods supported by p.adjust();
#default is 'bonferroni'
{
#library(vegan)
co = combn(unique(factors),2)
pairs = c()
F.Model =c()
R2 = c()
p.value = c()
for(elem in 1:ncol(co)){
ad = adonis(x[factors %in% c(co[1,elem],co[2,elem]),] ~
           factors[factors %in% c(co[1,elem],co[2,elem])] ,
           method =sim.method); #Extracting a matrix only containing samples of a pair
pairs = c(pairs,paste(co[1,elem], 'vs', co[2,elem]));
F.Model =c(F.Model,ad$aov.tab[1,4]);
R2 = c(R2,ad$aov.tab[1,5]);
p.value = c(p.value,ad$aov.tab[1,6])
}
p.adjusted = p.adjust(p.value,method=p.adjust.m) #adjusting after all comparisons
pairw.res = data.frame(pairs,F.Model,R2,p.value,p.adjusted)
return(pairw.res)
}

pairwise.adonis(t(Taxonomy2), as.character(Metadata$Diagnosis))

```

```

##           pairs    F.Model      R2 p.value p.adjusted
## 1  T2D vs Control 3.7595007 0.026520273 0.001    0.006
## 2    T2D vs LADA 0.9943077 0.007708152 0.399    1.000
## 3    T2D vs T1D 4.6878365 0.045651332 0.001    0.006
## 4 Control vs LADA 5.4738620 0.041010741 0.001    0.006
## 5 Control vs T1D 3.0663286 0.030339764 0.002    0.012
## 6    LADA vs T1D 4.8712429 0.052451574 0.001    0.006

```

```

pairw.res<-pairwise.adonis(t(Taxonomy2), as.character(Metadata$Diagnosis))

```

```

##Implementation of adonis2 can not get to work

```

```

##My implementation of adonis2 for my data when running with diagnosis

##Testing function
x <- t(Taxonomy2)
factors <- as.character(Metadata$Diagnosis)
factors2 <- as.character(Metadata$Metformin)
sim.method <- 'bray'
p.adjust.m <- 'bonferroni'
#elem<-1
#elem<-5

#pairwise.adonis.multiplevar <- function(x, factors, factors2, sim.method = 'bray',
#p.adjust.m='bonferroni')
#x = the community table
#factors = a column or vector with all factors to be tested pairwise
#sim.method = similarity function, one of the functions available in vegdist(); default is
#'bray' for bray-curtis
#p.adjust.m = the p.value correction method, one of the methods supported by p.adjust();
#default is 'bonferroni'
#{
#library(vegan)
co = combn(unique(factors),2)
pairs = c()
F.Model =c()
R2 = c()
p.value = c()
F.Model.2 =c()
R2.2 = c()
p.value.2 = c()
#for(elem in 1:ncol(co)){
for(elem in c(1:4,6)){
ad = adonis2(x[factors %in% c(co[1,elem],co[2,elem]),] ~
            factors[factors %in% c(co[1,elem],co[2,elem])] +
            factors2[factors %in% c(co[1,elem],co[2,elem])],
            method =sim.method, by="margin"); #Extracting a matrix only containing
            #samples of a pair
pairs = c(pairs,paste(co[1,elem], 'vs', co[2,elem]));
F.Model =c(F.Model,ad$F[1]);
R2 = c(R2,ad$R2[1]);
p.value = c(p.value,ad$`Pr(>F)`[1])
F.Model.2 =c(F.Model.2,ad$F[2])
R2.2 = c(R2.2,ad$R2[2])
p.value.2 = c(p.value.2,ad$`Pr(>F)`[2])
}
p.adjusted = p.adjust(p.value,method=p.adjust.m)
p.adjusted.2 = p.adjust(p.value.2,method=p.adjust.m)
pairw.res.2 = data.frame(pairs, F.Model, R2, p.value, p.adjusted,
                        F.Model.2, R2.2, p.value.2, p.adjusted.2)
#return(pairw.res)
#}

#pairwise.adonis.multiplevar(t(Taxonomy2), factors = as.character(Metadata$Diagnosis),
#                             factors2 = as.character(Metadata$Metformin),

```

```

#                               sim.method = 'bray', p.adjust.m = 'bonferroni')

pairw.res.2

##           pairs F.Model          R2 p.value p.adjusted F.Model.2          R2.2
## 1 T2D vs Control 1.255319 0.008855077 0.194      0.970 1.0030931 0.007075862
## 2   T2D vs LADA 0.884964 0.006811912 0.568      1.000 1.9127888 0.014723479
## 3     T2D vs T1D 2.428035 0.023660398 0.009      0.045 0.9354444 0.009115598
## 4 Control vs LADA 1.068822 0.007937252 0.329      1.000 2.1365222 0.015866169
## 5   LADA vs T1D 1.835182 0.019537745 0.038      0.190 2.0032817 0.021327376
##  p.value.2 p.adjusted.2
## 1      0.406         1.000
## 2      0.023         0.115
## 3      0.517         1.000
## 4      0.010         0.050
## 5      0.023         0.115

write.table(pairw.res, file="adonis_pairwisediagnosis.txt",
            quote = F, row.names = F, sep="\t")
write.table(pairw.res.2, file="adonis2_pairwisediagnosiswvarmet.txt",
            quote = F, row.names = F, sep="\t")

```

## Pairwise PERMANOVA remove metformin

```

rm(list=setdiff(ls(), c("Metadata", "MetadataMed", "Feature", "TaxonomyDA", "Taxonomy")))

##Removing treated with metformin
#Metadata$Metformin <- ifelse(is.na(Metadata$Metformin), "Unknow", Metadata$Metformin)
Metadata2<-filter(Metadata, !Metformin == 1)
##Applying subsetting to OTU tables
Taxonomy2<-dplyr::select(Taxonomy, one_of(as.character(Metadata2$MicrobiomeID)))
##Remove orgs that are not present after subsetting.
Taxonomy2 <- Taxonomy2[rowSums(Taxonomy2)>0,]

##Initial normalization/transformation the function runs method from adonis passed from
##vegdist
##Hellinger transformation
Taxonomy2 <- data.frame(t(decostand(t(Taxonomy2), method="hellinger")))
##Maks TSS
Taxonomy2<-sweep(Taxonomy2, 2, colSums(Taxonomy2), FUN="/")

##Testing function
#x <- t(Taxonomy2)
#factors <- as.character(Metadata$Diagnosis)
#sim.method <- 'bray'
#p.adjust.m <- 'bonferroni'
#elem<-1

pairwise.adonis <- function(x, factors, sim.method = 'bray', p.adjust.m = 'bonferroni')
#x = the community table
#factors = a column or vector with all factors to be tested pairwise

```

```

#sim.method = similarity function, one of the functions available in vegdist(); default is
#'bray' for bray-curtis.
#p.adjust.m = the p.value correction method, one of the methods supported by p.adjust();
#default is 'bonferroni'
{
#library(vegan)
co = combn(unique(factors),2)
pairs = c()
F.Model =c()
R2 = c()
p.value = c()
for(elem in 1:ncol(co)){
ad = adonis(x[factors %in% c(co[1,elem],co[2,elem]),] ~
          factors[factors %in% c(co[1,elem],co[2,elem])] ,
          method =sim.method); #Extracting a matrix only containing samples of a pair
pairs = c(pairs,paste(co[1,elem], 'vs', co[2,elem]));
F.Model =c(F.Model,ad$aov.tab[1,4]);
R2 = c(R2,ad$aov.tab[1,5]);
p.value = c(p.value,ad$aov.tab[1,6])
}
p.adjusted = p.adjust(p.value,method=p.adjust.m) #adjusting after all comparisons
pairw.res = data.frame(pairs,F.Model,R2,p.value,p.adjusted)
return(pairw.res)
}

pairwise.adonis(t(Taxonomy2), as.character(Metadata2$Diagnosis))

```

```

##           pairs  F.Model      R2 p.value p.adjusted
## 1 Control vs T2D 1.365293 0.01478146 0.117 0.702
## 2 Control vs LADA 1.191066 0.01466992 0.222 1.000
## 3 Control vs T1D 3.066329 0.03033976 0.001 0.006
## 4 T2D vs LADA 0.698268 0.02072118 0.861 1.000
## 5 T2D vs T1D 2.619818 0.04885914 0.003 0.018
## 6 LADA vs T1D 2.083516 0.04950908 0.013 0.078

```

```

pairw.res<-pairwise.adonis(t(Taxonomy2), as.character(Metadata2$Diagnosis))

```

```

##Implementation of adonis2 can not get to work
##Made my implementation of adonis2 for my data when running with diagnosis and
#in this case the other factor metformin so removed when removing samples with
#patients treated with metformin

```

```

write.table(pairw.res, file="adonis_pairwisediagnosisremovedmetsamples.txt",
          quote = F, row.names = F, sep="\t")

```

## Heatmap

```

rm(list=setdiff(ls(), c("Metadata", "MetadataMed", "Feature", "TaxonomyDA", "Taxonomy")))

```



```

#Add a categorical indicator of sex in Metadata also used in rest of script
Metadata$Sex<-as.factor(ifelse(grepl("1", Metadata$sex), "Male",
                                ifelse(grepl("2", Metadata$sex), "Female",
                                          "hmmmmm")))

#The organisms clustering
OrgCluster<-"correlation"

#How many organisms to include in heatmap
Orgs<-25 #Write a number 20-50 seems appropriate for readability

HeatmapExplainers<-c("Sex", "Metformin", "Diagnosis")

#Make list of annotation colors
annotation_colorsNew = list(Diagnosis = c(Control = "#666666", T1D = "#1F78B4",
                                           LADA = "#E31A1C", T2D = "#33A02C"),
                             Metformin = c("0" = "white", "1" = "black"),
                             Sex = c(Male = "black", Female = "white"))

#Order genera, based on rowsums
TaxHeatmap <- Taxonomy[order(rowSums(Taxonomy), decreasing = T),]

#Impose a maximum number of plotted genera
TaxHeatmap <- TaxHeatmap[1:min(c(nrow(TaxHeatmap), Orgs)),]

##Then I standardized the orgs into zero mean and unit variance
TaxHeatmap <- data.frame(t(decostand(t(TaxHeatmap), method="standardize")))
#Can also use scale in pheatmap, but not exactly sure what scaling that is being performed

#Make dataframe with Metadata for heatmap annotation
colannodf <- data.frame(Metadata[, HeatmapExplainers], row.names = Metadata$MicrobiomeID)

#Calculate sample-distance matrix
#Note, that this is done on the full set, not just the shown. Makes sense eventhough not
#show in heatmap they can be in the clustering calculations, this also means samples can
#look more similar in the heatmap but not cluster as closely. Also calculates on the not
#log transformed data.
#filtering of the Counttable depending on rowSums.
Tax2 <- Taxonomy[rowSums(Taxonomy)>0,] #Removing all rows that only contains zeroes
#Tax2 <- Tax2[rowSums(Tax2)>(5*ncol(Tax2)),] #Removing all rows(Species) that is below an
#average count of 5.
# replace 0 values with an estimate using simple multiplicative replacement
#Tax2 <- t(cmultRepl(t(Tax2), method="CZM", label=0))
#Maks TSS
Tax2<-sweep(Tax2, 2, colSums(Tax2), FUN="/")
#Calculate sample-distance matrix
#Note, that this is done on the full set, not just the shown. Makes sense eventhough not
#show in heatmap they can be in the clustering calculations, this also means samples can
#look more similar in the heatmap but not cluster as closely. Also calculates on the not
#log transformed data.

```

```

#distmatrix_Species <- vegdist(ilr(t(Tax2)), method="euclidean") #Previously
distmatrix_Species <- vegdist(decostand(t(Tax2), method="hellinger"), method="bray")

#Draw the heatmap
pdf(paste("MicroLADA_Heatmap", ".pdf", sep=""), width=15, height=5)
pheatmap(TaxHeatmap,
  #color = colorRampPalette(rev(brewer.pal(n = 7, name = "Blues")))(100),
  color = colorRampPalette(rev(brewer.pal(n = 7, name = "RdYlBu")))(100),
  margins=c(8,8),
  treeheight_row = 70,
  treeheight_col = 70,
  scale="none",
  clustering_distance_cols = distmatrix_Species,
  clustering_distance_rows = OrgCluster,
  annotation_col = colannodf,
  cutree_cols = 2,
  show_colnames = FALSE,
  #cellwidth=5,
  #cellheight=4,
  fontsize=10,
  annotation_colors = annotation_colorsNew[1:7],
  annotation_legend = TRUE)
dev.off()

```

```

## pdf
## 3

```

```

#Does not output plot to knitr

```

## CCA

```

rm(list=setdiff(ls(), c("Metadata", "MetadataMed", "Feature", "TaxonomyDA", "Taxonomy", "Fig2List")))

#Create a list to hold the plot objects.
Fig2List <- list()

#Norm of Tax. Should be taken into account. The chi square distance that is the basis of
#cca makes raw counts appropriate.
#See https://sites.google.com/site/mb3gustame/reference/dissimilarity

#Filtering of the Counttable depending on rowSums. Prevents overplotting
Taxonomy2 <- Taxonomy[rowSums(Taxonomy)>(50*length(Taxonomy)),]
#Taxonomy2<-Taxonomy

##Total sum scaling (Use relative abundances)
Taxonomy2<-sweep(Taxonomy2, 2, colSums(Taxonomy2), FUN="/")

##Perform cca
ccaord <- cca(t(Taxonomy2) ~ Diagnosis + Condition(Metformin), Metadata)
ccaord

```

```
## Call: cca(formula = t(Taxonomy2) ~ Diagnosis + Condition(Metformin),
## data = Metadata)
##
##              Inertia Proportion Rank
## Total          3.28993    1.00000
## Conditional    0.04234    0.01287    1
## Constrained    0.05203    0.01581    3
## Unconstrained  3.19557    0.97132   122
## Inertia is scaled Chi-square
##
## Eigenvalues for constrained axes:
##   CCA1   CCA2   CCA3
## 0.026008 0.013717 0.012301
##
## Eigenvalues for unconstrained axes:
##   CA1   CA2   CA3   CA4   CA5   CA6   CA7   CA8
## 0.23924 0.17501 0.16455 0.16302 0.13492 0.12763 0.11811 0.11654
## (Showing 8 of 122 unconstrained eigenvalues)
```

```
#summary(ccaord)
plot(ccaord)
```

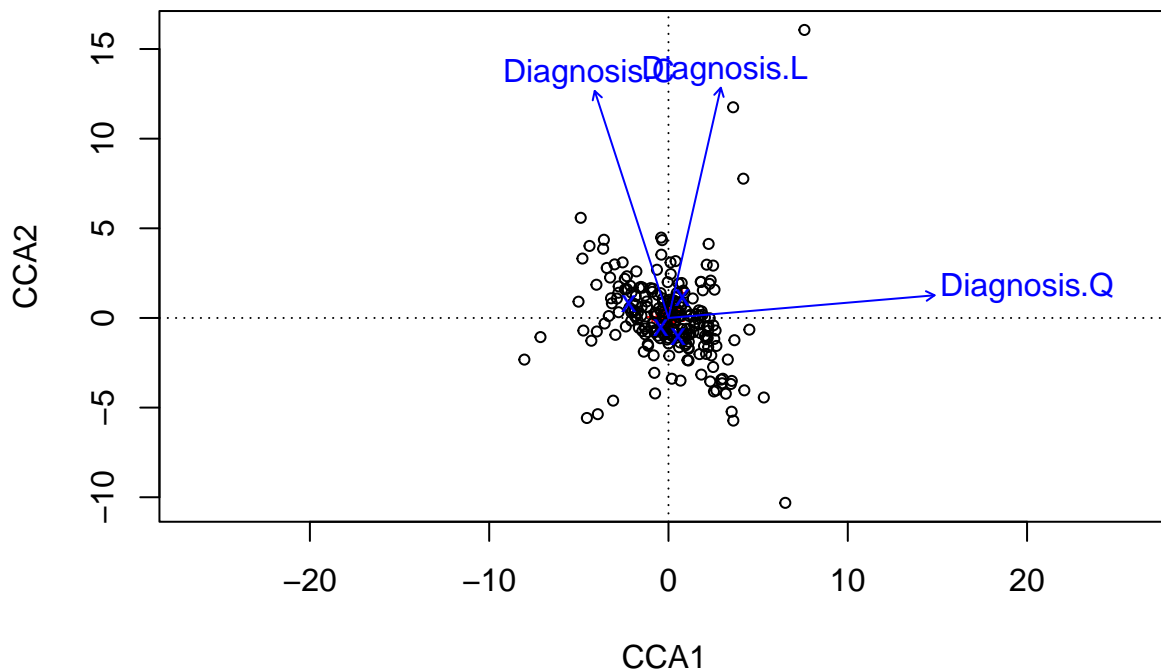

```
anova(ccaord) #Only Diagnosis
```

```
## Permutation test for cca under reduced model
```

```
## Permutation: free
## Number of permutations: 999
##
## Model: cca(formula = t(Taxonomy2) ~ Diagnosis + Condition(Metformin), data = Metadata)
##           Df ChiSquare      F Pr(>F)
## Model      3    0.0520 1.2211  0.05 *
## Residual 225    3.1956
## ---
## Signif. codes:  0 '***' 0.001 '**' 0.01 '*' 0.05 '.' 0.1 ' ' 1
```

```
##Other model
#ccaord2 <- cca(t(Taxonomy2)~Diagnosis+Metformin, Metadata)
#ccaord2
#summary(ccaord2)
#plot(ccaord2)
#anova(ccaord2, by="margin", permutations=199)

##ggvegan implementation of visualization
#devtools::install_github("gavinsimpson/ggvegan")
#library(ggvegan)
#autoplot(ccaord)

#Custom modification refer to cca object description
#https://www.rdocumentation.org/packages/vegan/versions/2.4-2/topics/cca.object

##My own implementation of cca visualization
#Extract scores from cca object
scores <- vegan::scores(ccaord, display=c("sp", "wa", "cn", "bp"), choices=c(1,2,3))

#Extract site information and add to metadata
sites <- data.frame(scores$sites)
sites$MicrobiomeID <- rownames(sites)
Metadata2 <- merge(Metadata, sites, by="MicrobiomeID")

#Extract species information and add to feature information
species <- data.frame(scores$species)
species$Genus <- rownames(species)
Feature2 <- merge(Feature, species, by="Genus")

#Create column org grouping for colouring
Feature2$Phyla <- ifelse(Feature2$Phylum=="Firmicutes", "Firmicutes",
  ifelse(Feature2$Phylum=="Proteobacteria", "Proteobacteria",
    ifelse(Feature2$Phylum=="Actinobacteria", "Actinobacteria",
      ifelse(Feature2$Phylum=="Bacteroidetes", "Bacteroidetes",
        ifelse(Feature2$Phylum=="Euryarchaeota", "Euryarchaeota",
          "Other")))))

#Order Phyla for plotting
Feature2$Phyla <- factor(Feature2$Phyla, levels=c("Proteobacteria", "Bacteroidetes",
  "Actinobacteria", "Firmicutes",
  "Euryarchaeota", "Other"))
```

```

#Extract information on inertia
inertia <- ccaord$CCA$tot.chi/ccaord$tot.chi
subheader <- paste("Inertia constrained by the explanatory variables",
                    round(inertia, digits=2))

##Extract information on eig
#eig1 <- (cca$CCA$eig[1]/(sum(cca$CCA$eig)+sum(cca$CA$eig)))*100
#eig_1 <- paste("CCA1", round(eig1, digits=2), "% of total variance")
#eig2 <- (cca$CCA$eig[2]/(sum(cca$CCA$eig)+sum(cca$CA$eig)))*100
#eig_2 <- paste("CCA2", round(eig2, digits=2), "% of total variance")

#Add a categorical indicator of group in Metadata
Metadata2$Metformin<-as.factor(ifelse(grepl("1", Metadata2$Metformin), "Yes",
                                       ifelse(grepl("0", Metadata2$Metformin), "No",
                                               "Unknown")))

#Order Treatment metformine for plotting
Metadata2$Metformin <- factor(Metadata2$Metformin, levels=c("Yes", "No", "Unknown"))

arrows<-data.frame(scores$centroids)
arrows$xstart<-0
arrows$ystart<-0
arrows$naming<-row.names(arrows)
arrows$naming<-str_remove(arrows$naming, "Diagnosis")

#Add text specific organisms to plot
textgenus<-Feature2 %>% dplyr::select(one_of("Genus", "CCA1", "CCA2")) %>%
  filter(Genus=="Faecalibacterium" |
         Genus=="Actinomyces" |
         Genus=="Butyricicoccus" |
         Genus=="Lachnoclostridium")

p1<-ggplot() +
  geom_point(data=Metadata2[which(Metadata2$Diagnosis=='Control'), ],
            aes(x=CCA1, y=CCA2, shape=Metformin, group=Diagnosis),
            color="#666666", size=1.5, alpha=0.5) +
  geom_point(data=Metadata2[which(Metadata2$Diagnosis=='T1D'), ],
            aes(x=CCA1, y=CCA2, shape=Metformin, group=Diagnosis),
            color="#1F78B4", size=1.5, alpha=0.5) +
  geom_point(data=Metadata2[which(Metadata2$Diagnosis=='T2D'), ],
            aes(x=CCA1, y=CCA2, shape=Metformin, group=Diagnosis),
            color="#33A02C", size=1.5, alpha=0.5) +
  geom_point(data=Metadata2[which(Metadata2$Diagnosis=='LADA'), ],
            aes(x=CCA1, y=CCA2, shape=Metformin, group=Diagnosis),
            color="#E31A1C", size=1.5, alpha=0.5) +
  scale_shape_manual(values=c(3, 16)) +
  geom_point(data=Feature2[which(Feature2$Phyla=="Proteobacteria"), ],
            aes(x=CCA1, y=CCA2, group=Genus), color="#A6CEE3", shape=18, size=0.7) +
  geom_point(data=Feature2[which(Feature2$Phyla=="Bacteroidetes"), ],
            aes(x=CCA1, y=CCA2, group=Genus), color="#FB9A99", shape=18, size=0.7) +
  geom_point(data=Feature2[which(Feature2$Phyla=="Actinobacteria"), ],
            aes(x=CCA1, y=CCA2, group=Genus), color="#FDBF6F", shape=18, size=0.7) +
  geom_point(data=Feature2[which(Feature2$Phyla=="Firmicutes"), ],
            aes(x=CCA1, y=CCA2, group=Genus),

```

```

        color="#B2DF8A", shape=18, size=0.7, alpha=0.75) +
geom_point(data=Feature2[which(Feature2$Phyla=="Euryarchaeota"), ],
          aes(x=CCA1, y=CCA2, group=Genus), color="#CAB2D6", shape=18, size=0.7) +
geom_point(data=Feature2[which(Feature2$Phyla=="Other"), ],
          aes(x=CCA1, y=CCA2, group=Genus), color="#B3B3B3", shape=18, size=0.7) +
geom_segment(data=arrows, aes(x=xstart, y=ystart, xend=CCA1, yend=CCA2),
            arrow=arrow(length = unit(0.01, "npc"))) +
geom_text(data=arrows, aes(x = CCA1, y = CCA2, label = naming),
          hjust = 0, nudge_x = 0.05, size=6) +
theme_bw() +
theme(panel.grid.major = element_blank(),
      panel.grid.minor = element_blank(),
      axis.title=element_text(size=22),
      legend.position="none",
      legend.title=element_text(size=20),
      legend.text=element_text(size=20),
      axis.text.x = element_text(angle = 45, hjust = 1, size=12),
      axis.text.y = element_text(angle = 45, hjust = 1, size=12)) +
scale_y_reverse()
pdf("MicroLADA_CCA.pdf", width=9, height=6)
p1
dev.off()

```

```

## pdf
## 2

```

```

#Save to list
Fig2List[[ "CCAalls" ]] <- p1

#Created plotly version only to be able to look into specific genera plotted
ggplotly(p1)

```

```

ggplotly(p1+xlim(-1.5, 2.5)+ylim(-1.5,2))

```

```

#Overlay plots with couplot
#p2<-p1+xlim(-1.5, 2.5)+ylim(-1.5,2)
p2<-ggplot() +
# geom_point(data=Metadata2[which(Metadata2$Diagnosis=='Control'), ],
#           aes(x=CCA1, y=CCA2, shape=Metformin, group=Diagnosis),
#           color="#666666", size=1.5, alpha=0.5) +
# geom_point(data=Metadata2[which(Metadata2$Diagnosis=='T1D'), ],
#           aes(x=CCA1, y=CCA2, shape=Metformin, group=Diagnosis),
#           color="#1F78B4", size=1.5, alpha=0.5) +
# geom_point(data=Metadata2[which(Metadata2$Diagnosis=='T2D'), ],
#           aes(x=CCA1, y=CCA2, shape=Metformin, group=Diagnosis),
#           color="#33A02C", size=1.5, alpha=0.5) +
# geom_point(data=Metadata2[which(Metadata2$Diagnosis=='LADA'), ],
#           aes(x=CCA1, y=CCA2, shape=Metformin, group=Diagnosis),
#           color="#E31A1C", size=1.5, alpha=0.5) +
scale_shape_manual(values=c(3, 16)) +
geom_point(data=Feature2[which(Feature2$Phyla=="Proteobacteria"), ],
          aes(x=CCA1, y=CCA2, group=Genus), color="#A6CEE3", shape=18, size=3) +

```

```

geom_point(data=Feature2[which(Feature2$Phyla=="Bacteroidetes"), ],
  aes(x=CCA1, y=CCA2, group=Genus), color="#FB9A99", shape=18, size=3) +
geom_point(data=Feature2[which(Feature2$Phyla=="Actinobacteria"), ],
  aes(x=CCA1, y=CCA2, group=Genus), color="#FDBF6F", shape=18, size=3) +
geom_point(data=Feature2[which(Feature2$Phyla=="Firmicutes"), ],
  aes(x=CCA1, y=CCA2, group=Genus),
  color="#B2DF8A", shape=18, size=3, alpha=0.75) +
geom_point(data=Feature2[which(Feature2$Phyla=="Euryarchaeota"), ],
  aes(x=CCA1, y=CCA2, group=Genus), color="#CAB2D6", shape=18, size=3) +
geom_point(data=Feature2[which(Feature2$Phyla=="Other"), ],
  aes(x=CCA1, y=CCA2, group=Genus), color="#B3B3B3", shape=18, size=3) +
geom_segment(data=arrows, aes(x=xstart, y=ystart, xend=CCA1, yend=CCA2),
  arrow=arrow(length = unit(0.01, "npc"))) +
geom_text(data=arrows, aes(x = CCA1, y = CCA2, label = naming),
  hjust = 0, nudge_x = 0.05, size=10) +
geom_text(data=textgenus, aes(x = CCA1, y = CCA2, label = Genus),
  hjust = 0, nudge_x = 0.05, size=8) +
theme_bw() +
theme(panel.grid.major = element_blank(),
  panel.grid.minor = element_blank(),
  axis.title=element_text(size=30),
  legend.position="none",
  legend.title=element_text(size=20),
  legend.text=element_text(size=20),
  axis.text.x = element_text(angle = 45, hjust = 1, size=22),
  axis.text.y = element_text(angle = 45, hjust = 1, size=22)) +
scale_y_reverse() +
xlim(-2.5, 2.5) +
ylim(-1.5,2)

p3<-p1 + theme(axis.line=element_blank(),
  axis.text.x=element_blank(),
  axis.text.y=element_blank(),
  axis.ticks=element_blank(),
  axis.title.x=element_blank(),
  axis.title.y=element_blank(),
  legend.position="none",
  panel.background=element_blank(),
  #panel.border=element_blank(),
  panel.grid.major=element_blank(),
  panel.grid.minor=element_blank(),
  plot.background=element_blank())

ggdraw(p2) + draw_plot(p3, x = 0.30, y = -0.22, scale = 0.40)

```

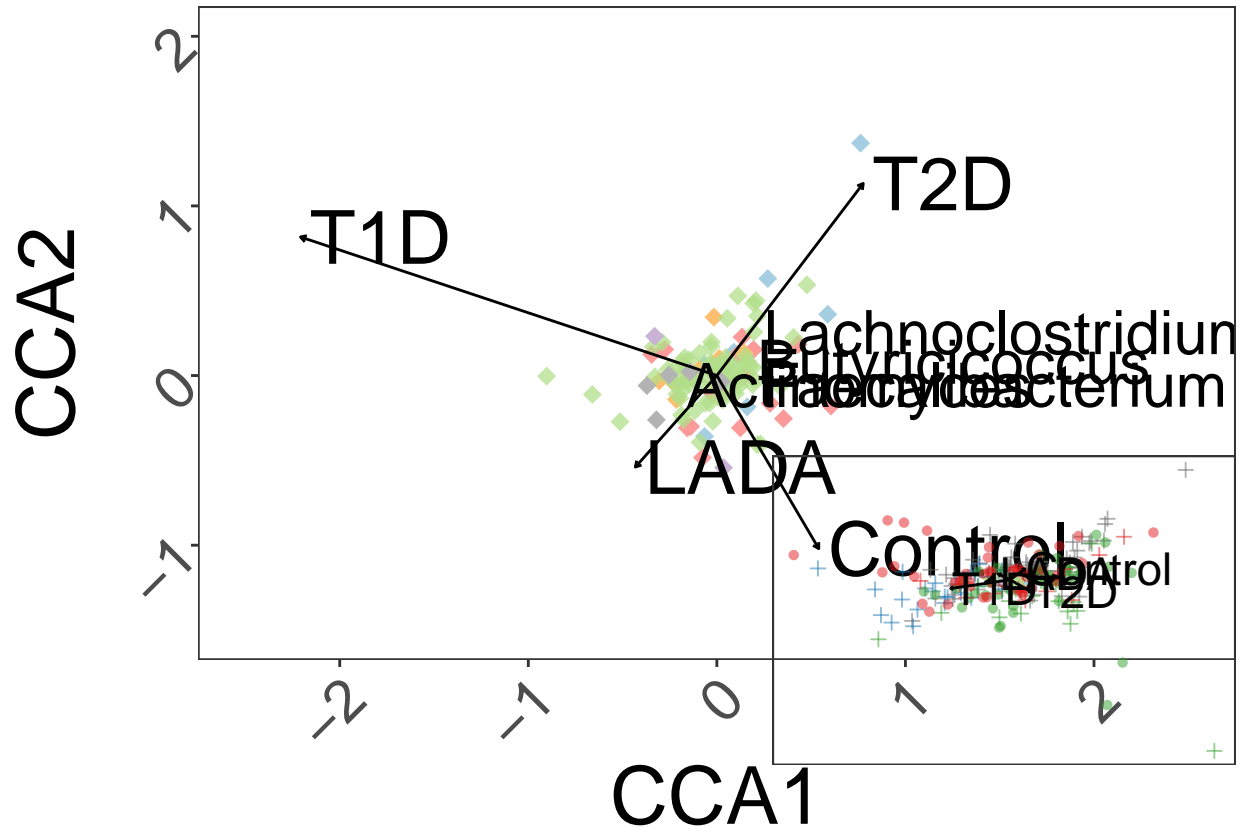

```
p4<-ggdraw(p2) + draw_plot(p3, x = 0.30, y = -0.18, scale = 0.40) ##22 below axis
#Save to list
Fig2List[[ "CCAoverlay" ]] <- p4
pdf("MicroLADA_CCAoverlay.pdf", width=9, height=6)
p4
dev.off()
```

```
## pdf
## 2
```

```
##Extract legends
#Extract legends phyla
Orgcol<-c("Proteobacteria" = "#A6CEE3",
          "Bacteroidetes" = "#FB9A99",
          "Actinobacteria" = "#FDBF6F",
          "Firmicutes" = "#B2DF8A",
          "Euryarchaeota" = "#CAB2D6",
          "Other" = "#B3B3B3")
#Plot with only legend colors for phyla
legend<-ggplot() +
  geom_point(data=Feature2, aes(x=CCA1, y=CCA2, group=Genus, color=Phyla),
            shape=18, size=6) +
  scale_color_manual(values=Orgcol) +
  theme_bw() +
  theme(legend.title=element_text(size=16),
```



```

    legend.text=element_text(size=14),
    legend.position="bottom")
#Store legends
legendplot<-get_legend(legend)
pdf("LegendCCAphyla_bottom.pdf", width=24, height=12)
grid.arrange(legendplot)
dev.off()

```

```

## pdf
## 2

```

```

#Save to list
Fig2List[[ "legendphylabottom" ]] <- legendplot

#Plot with only legend colors for phyla
legend<-ggplot() +
  geom_point(data=Feature2, aes(x=CCA1, y=CCA2, group=Genus, color=Phyla),
            shape=18, size=6) +
  scale_color_manual(values=Orgcol) +
  theme_bw() +
  theme(legend.title=element_text(size=16),
        legend.text=element_text(size=14),
        legend.position="right")
#Store legends
legendplot<-get_legend(legend)
pdf("LegendCCAphyla_right.pdf", width=24, height=12)
grid.arrange(legendplot)
dev.off()

```

```

## pdf
## 2

```

```

#Save to list
Fig2List[[ "legendphylaright" ]] <- legendplot

#Extract legends diagnosis
legend<-ggplot() +
  geom_point(data=Metadata2,
            aes(x=CCA1, y=CCA2, shape=Metformin, color=Diagnosis, group=Diagnosis),
            size=6, alpha=0.5) +
  scale_shape_manual(values=c(3, 16)) +
  scale_color_manual(values=c(Control = "#666666", T1D = "#1F78B4",
                              T2D = "#33A02C", LADA = "#E31A1C")) +
  theme_bw() +
  theme(legend.title=element_text(size=16),
        legend.text=element_text(size=14),
        legend.position="bottom")
#Store legends
legendplot<-get_legend(legend)
pdf("LegendCCAsamples_bottom.pdf", width=24, height=12)
grid.arrange(legendplot)
dev.off()

```

```
## pdf
## 2
```

```
#Save to list
Fig2List[[ "legendsamplesbottom" ]] <- legendplot

#Extract legends diagnosis
legend<-ggplot() +
  geom_point(data=Metadata2,
            aes(x=CCA1, y=CCA2, shape=Metformin, color=Diagnosis, group=Diagnosis),
            size=6, alpha=0.5) +
  scale_shape_manual(values=c(3, 16)) +
  scale_color_manual(values=c(Control = "#666666", T1D = "#1F78B4",
                              T2D = "#33A02C", LADA = "#E31A1C")) +
  theme_bw() +
  theme(legend.title=element_text(size=16),
        legend.text=element_text(size=14),
        legend.position="right")

#Store legends
legendplot<-get_legend(legend)
pdf("LegendCCAsamples_right.pdf", width=24, height=12)
grid.arrange(legendplot)
dev.off()
```

```
## pdf
## 2
```

```
#Save to list
Fig2List[[ "legendsamplesright" ]] <- legendplot
```

## DESeq2 LRT

Analysis of deviance ANODEV

Size factors as column sums (Relative abundance), Total count standardized relative abundance as column sums

```
rm(list=setdiff(ls(), c("Metadata", "MetadataMed", "Feature", "TaxonomyDA", "Taxonomy", "Fig2List")))

#Can also be run with metformin as covariate, but decided not to due to treatment follow diagnosis.
#Better to compare with analysis run with individuals receiving metformin removed.

#Reassign names
Metadata2<-Metadata
Taxonomy2<-TaxonomyDA

#The factor can not be ordered for DESeq to run
Metadata2$Diagnosis<-factor(Metadata2$Diagnosis, ordered=FALSE)

#Create design formula
```

```

#design <- formula(paste("~ ", "Diagnosis", "+", "Metformin"))
design <- formula(paste("~ ", "Diagnosis", "+", "BMIq"))
#design <- formula(paste("~ ", "Diagnosis"))
#Create DESeq2 object with matrix and metadata
dds <- DESeqDataSetFromMatrix(countData = Taxonomy2,
                              colData = Metadata2,
                              design = design)

##Assess and calculate size factors using the different methods
SF<-data.frame(Ratio=sizeFactors(estimateSizeFactors(dds, type="ratio")),
              Poscounts=sizeFactors(estimateSizeFactors(dds, type="poscounts")),
              Iterate=sizeFactors(estimateSizeFactors(dds, type="poscounts")),
              #"iterate" takes a lot of time changed to "poscounts" but kept due to the
              #following code
              Relative=colSums(Taxonomy2)/mean(colSums(Taxonomy2))
              )
SF<-add_rownames(SF, var="MicrobiomeID")
#Adding total abundances
# old path path<-paste("Q:/",
#                       "Projects/",
#                       "LADA/",
#                       "LADA_Sandra_Evelina/",
#                       "LADA_JKV/",
#                       "LADA_R_AfterFlow_Analysis_FinalCounts/",
#                       "LADA_FinalCounts/",
#                       "2019-09-03_CountAnalysis.rds", sep="")

path <- paste("J:/",
              "CBMR/",
              "SUN-CBMR-Hansen-Group/",
              "Projects/",
              "LADA/",
              "LADA_Sandra_Evelina/",
              "LADA_JKV/",
              "LADA_R_AfterFlow_Analysis_FinalCounts/",
              "LADA_FinalCounts/",
              "2019-09-03_CountAnalysis.rds", sep="")

TotalCounts<-readRDS(path)
TotalCountsProcess <-
  data.frame(MicrobiomeID=TotalCounts$DF_Save_w$ID,
             CellNorm=TotalCounts$DF_Save_w$Cells_per_g_feces_FR_corrected_mean)
TotalCountsProcess$MicrobiomeID <- paste("L", TotalCountsProcess$MicrobiomeID,
                                         sep="")
SF2<-merge(SF, TotalCountsProcess, by="MicrobiomeID")

#One value is NaN in sample 602059 assigns value as average
SF2$CellNorm[is.nan(SF2$CellNorm)]<-mean(na.omit(SF2$CellNorm))

SF2$CellNormStand<-SF2$CellNorm/mean(SF2$CellNorm) #Watch out for NaN values can assign
#average, but wants the error

```

```

SF3<-merge(Metadata2, SF2, by="MicrobiomeID")
#DESeq divides with sizeFactor (High cell count should have low sizeFactor providing
#larger counts in a sample)
#Still have to consider seq data is relative
SF3$NormRelCell<-SF3$Relative/SF3$CellNormStand
#Overview of normalization factors
aggregate(SF3[, 14:20], list(SF3$Diagnosis), mean) #Have to run heatmap chunk adding sex

```

```

##  Group.1      Ratio Poscounts  Iterate  Relative  CellNorm CellNormStand
## 1 Control 1.021277 1.0816841 1.0816841 1.0024242 20384275367      1.0420944
## 2   T1D 1.189194 1.3530621 1.3530621 1.1533999 18731782275      0.9576149
## 3   LADA 1.154124 1.0508265 1.0508265 0.9635197 18940404238      0.9682802
## 4   T2D 1.102417 0.9754019 0.9754019 0.9631018 19624620327      1.0032590
##  NormRelCell
## 1   1.078577
## 2   1.333993
## 3   1.069666
## 4   1.076697

```

```

#to metadata
aggregate(SF3[, 14:20], list(SF3$Diagnosis), sd)

```

```

##  Group.1      Ratio Poscounts  Iterate  Relative  CellNorm CellNormStand
## 1 Control 0.5077220 0.3258182 0.3258182 0.2396082 6781846681      0.3467047
## 2   T1D 0.3607959 0.4887817 0.4887817 0.1896984 5712095609      0.2920164
## 3   LADA 0.5115578 0.4411272 0.4411272 0.2136868 5544046390      0.2834253
## 4   T2D 0.4568660 0.3704665 0.3704665 0.2075670 6146706989      0.3142348
##  NormRelCell
## 1   0.5133752
## 2   0.5220606
## 3   0.3592809
## 4   0.4836133

```

```

pairs(SF3[, c(14:17,19,20)], col=SF3$Diagnosis)

```

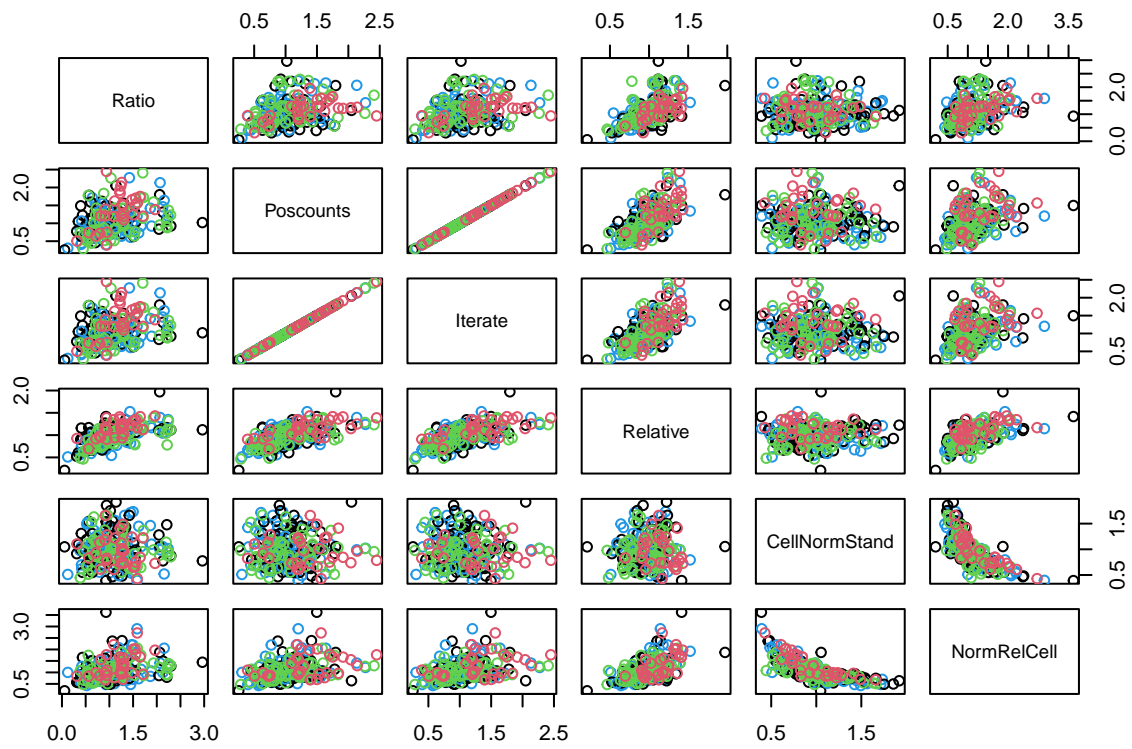

```
pairs(SF3[, c(15,17,19,20)], col=SF3$Diagnosis)
```

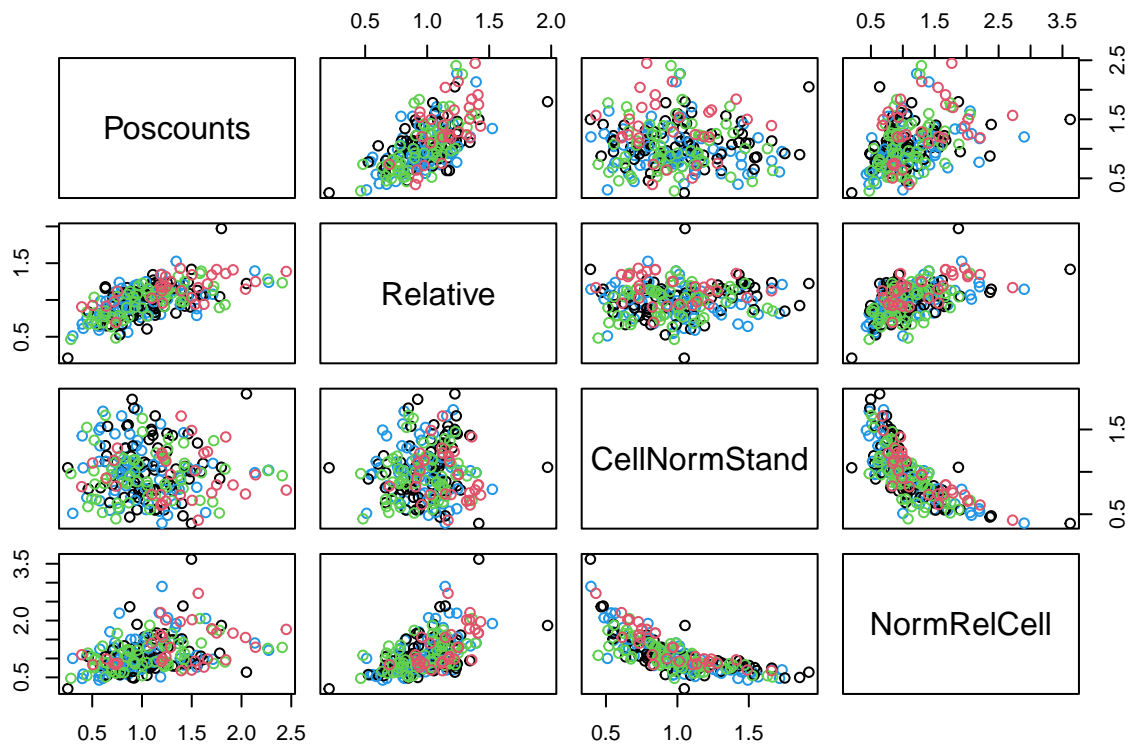

```
#I do want CellNormStand and NormRelCell to be negatively correlated due to DESeq divide
#with sizeFactor. It is also good that CellNormStand seems uncorrelated to the other
#normalization factors.
```

```
##Select size factors calculated above for normalization
dds@colData@listData$sizeFactor <- SF3[,20]
#hist(dds@colData@listData$sizeFactor)
#colnames(SF3[13])
normname<-colnames(SF3[20])

##See vignette for note on factor levels
#Filtering of the Counttable. Bare minimum is performed later. Also to reduce memory of
#the dds
dds2 <- dds[ rowSums(counts(dds))>50*length(Taxonomy2),] #Previously 0 instead of 1

#Estimate dispersions and fit the GLM
#dds2 <- DESeq(dds2, test="LRT", reduced = ~Metformin)
dds2 <- DESeq(dds2, test="LRT", reduced = ~1)

res<-results(dds2)
summary(res)
```

```
##
## out of 82 with nonzero total read count
```

```
## adjusted p-value < 0.1
## LFC > 0 (up)      : 8, 9.8%
## LFC < 0 (down)   : 7, 8.5%
## outliers [1]     : 0, 0%
## low counts [2]   : 0, 0%
## (mean count < 49)
## [1] see 'cooksCutoff' argument of ?results
## [2] see 'independentFiltering' argument of ?results
```

```
resultsNames(dds2)
```

```
## [1] "Intercept"          "Diagnosis_T1D_vs_Control"
## [3] "Diagnosis_LADA_vs_Control" "Diagnosis_T2D_vs_Control"
## [5] "BMIq"
```

```
##MA plots from inbuilt DESeq function
plotMA(dds2, alpha=0.1)
```

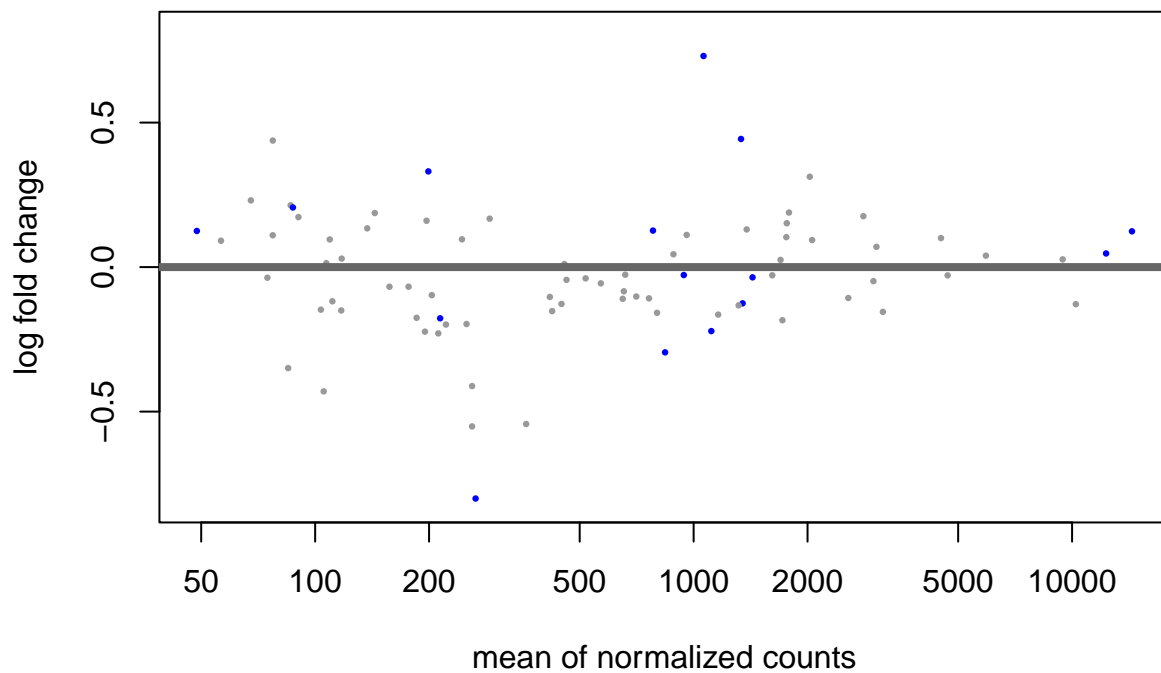

```
plotMA(res, ylim=c(-2,2))
```

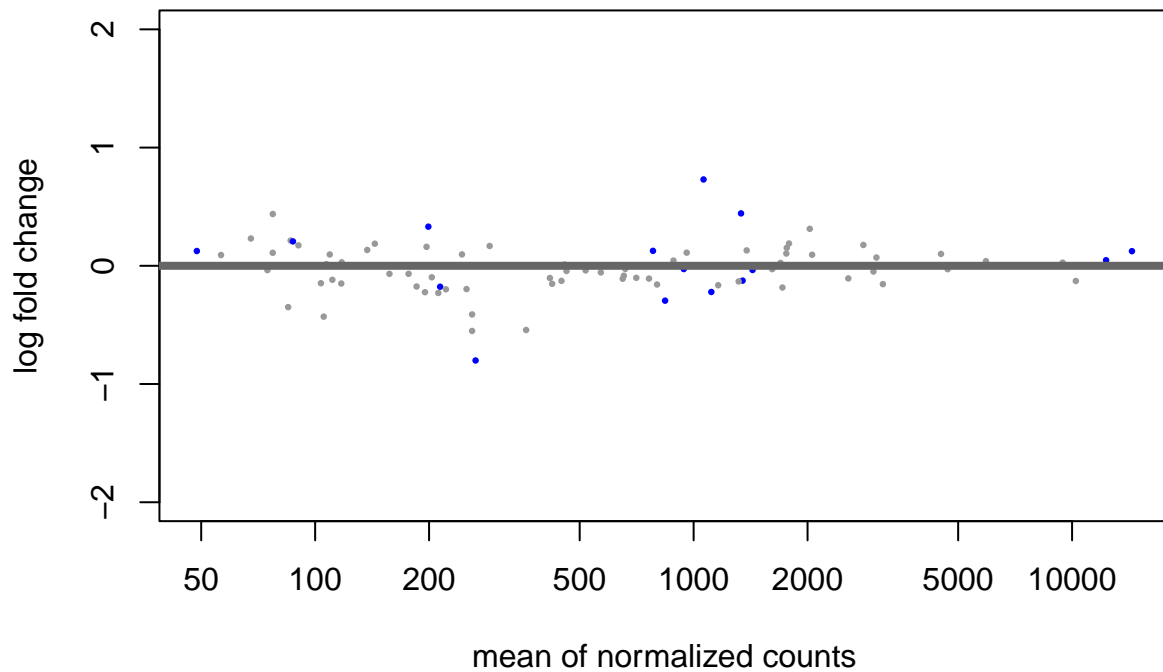

```

#Unshrunken/shrunken
#res<-results(dds2, addMLE=TRUE)
#resLFC <- DESeq2::lfcShrink(dds2, coef=2)
#resLFC
#DESeq2::plotMA(resLFC, ylim=c(-2,2))

#Make histogram
#pdf(paste("HistogramDESeq", ".pdf", sep=""), height=6, width=12)
hist(res$pvalue[res$baseMean > 1], breaks = 0:20/20,
      col = "grey50", border = "white")

```



## Histogram of res\$pvalue[res\$baseMean > 1]

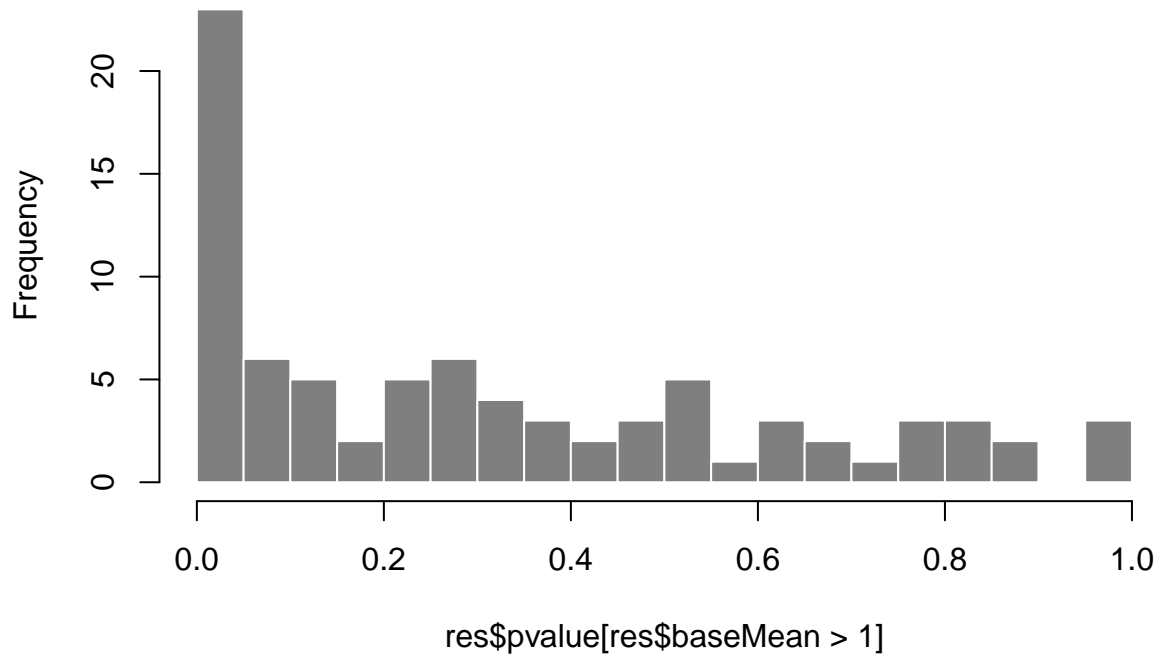

```
#dev.off()
```

```
#Show dispersion plot with shrinkage
```

```
#pdf(paste("DispersionplotDESeq", ".pdf", sep=""), height=9, width=12)
```

```
plotDispEsts(dds2)
```

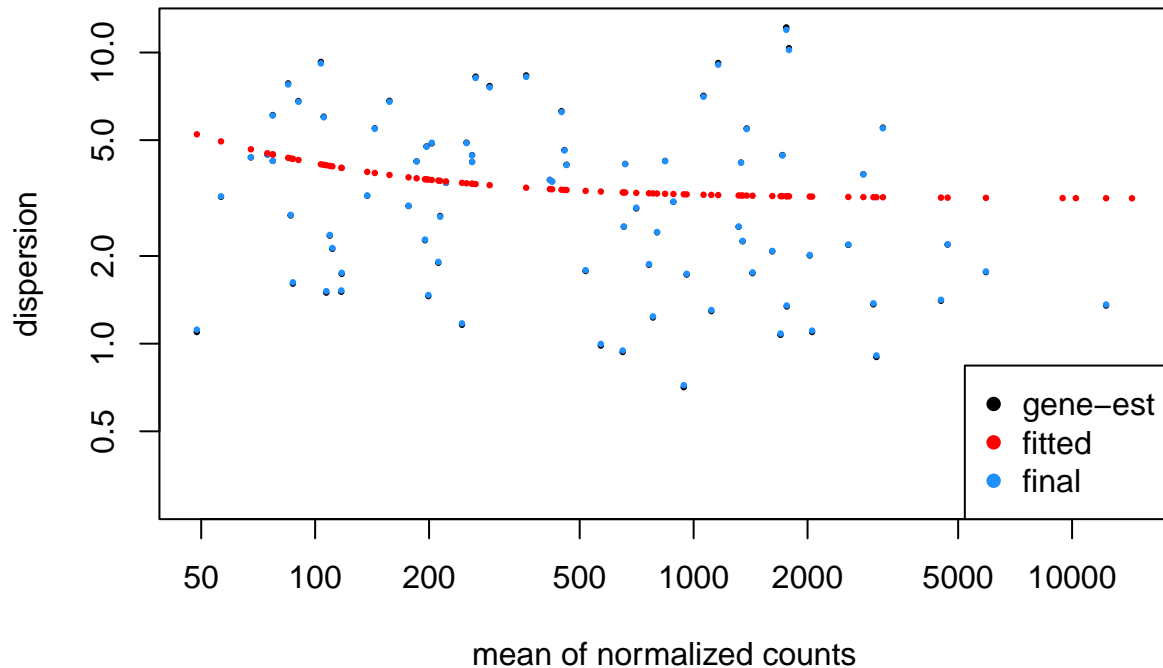

```
#dev.off()

##Plot PCA
#dds2_rlog<-rlogTransformation(dds2)
##pdf(paste("PCADESeq", ".pdf", sep=""), height=9, width=9)
#plotPCA(dds2_rlog, intgroup=c("Diagnosis"))+coord_fixed()
##dev.off()

#Data structuring
resSig=subset(res, pvalue<0.05) #Could also have selected other value or padj
df <- data.frame(res)
dfSig <- data.frame(resSig)

#Save table.
write.table(dfSig, file="DESeq_SigLRT.txt", sep="\t", dec=",", row.names = T)
print("Significant LRT")
```

```
## [1] "Significant LRT"
```

```
kable(dfSig)
```

|             | baseMean | log2FoldChange | lfcSE     | stat      | pvalue    | padj      |
|-------------|----------|----------------|-----------|-----------|-----------|-----------|
| Actinomyces | 48.68949 | 0.1250123      | 0.0981755 | 18.603766 | 0.0009401 | 0.0138739 |

|                               | baseMean    | log2FoldChange | lfcSE     | stat      | pvalue    | padj      |
|-------------------------------|-------------|----------------|-----------|-----------|-----------|-----------|
| Parabacteroides               | 1113.74127  | -0.2214684     | 0.1051180 | 15.688121 | 0.0034675 | 0.0315930 |
| Lactobacillus                 | 1062.10266  | 0.7303690      | 0.2442038 | 20.885143 | 0.0003337 | 0.0068411 |
| Christensenellaceae_R.7_group | 1347.24525  | -0.1254238     | 0.1381507 | 14.046646 | 0.0071477 | 0.0555450 |
| Clostridium_sensu_stricto_1   | 840.65653   | -0.2949778     | 0.1893029 | 17.128070 | 0.0018253 | 0.0187091 |
| Blautia                       | 14393.56810 | 0.1237883      | 0.0611240 | 13.582127 | 0.0087554 | 0.0598285 |
| Fusicatenibacter              | 2986.10151  | -0.0485782     | 0.1079209 | 9.529692  | 0.0491407 | 0.1751973 |
| Lachnoclostridium             | 780.88361   | 0.1263943      | 0.1025334 | 28.296170 | 0.0000109 | 0.0004454 |
| Lachnospira                   | 213.93756   | -0.1772069     | 0.1520756 | 12.762801 | 0.0124949 | 0.0711619 |
| Roseburia                     | 1431.19573  | -0.0354981     | 0.1219584 | 12.962207 | 0.0114619 | 0.0711619 |
| Butyrivibrio                  | 941.98315   | -0.0274939     | 0.0781318 | 18.433469 | 0.0010152 | 0.0138739 |
| Faecalibacterium              | 12297.06909 | 0.0471612      | 0.1073988 | 12.667973 | 0.0130174 | 0.0711619 |
| Negativibacillus              | 77.28674    | 0.4378604      | 0.1898986 | 10.756939 | 0.0294359 | 0.1340967 |
| Oscillibacter                 | 199.11901   | 0.3310706      | 0.1117231 | 13.951594 | 0.0074512 | 0.0555450 |
| Ruminiclostridium_5           | 649.61339   | -0.1096863     | 0.0896150 | 9.767440  | 0.0445327 | 0.1659857 |
| Ruminiclostridium_6           | 259.81035   | -0.5511814     | 0.1937340 | 11.562436 | 0.0209198 | 0.1072137 |
| Ruminococcaceae_UCG.010       | 259.84142   | -0.4116403     | 0.1887162 | 10.108381 | 0.0386411 | 0.1584284 |
| UBA1819                       | 87.35346    | 0.2062960      | 0.1176827 | 17.505838 | 0.0015410 | 0.0180512 |
| Family.Erysipelotrichaceae.   | 56.39729    | 0.0912006      | 0.1652792 | 10.360298 | 0.0347767 | 0.1500891 |
| Veillonella                   | 265.43054   | -0.8007728     | 0.2632080 | 25.894313 | 0.0000332 | 0.0009084 |
| Order.Rhodospirillales.       | 84.86068    | -0.3494951     | 0.2566468 | 11.156592 | 0.0248594 | 0.1199099 |
| Bilophila                     | 137.28563   | 0.1341460      | 0.1654708 | 9.857536  | 0.0428971 | 0.1659857 |
| Escherichia/Shigella          | 1334.40881  | 0.4433030      | 0.1881418 | 51.089174 | 0.0000000 | 0.0000000 |

## DESeq2 LRT remove metformin

Analysis of deviance ANODEV

Size factors as column sums (Relative abundance), Total count standardized relative abundance as column sums

```
rm(list=setdiff(ls(), c("Metadata", "MetadataMed", "Feature", "TaxonomyDA", "Taxonomy",
                        "Fig2List")))

#Reassign names
#Metadata2<-Metadata
Taxonomy2<-TaxonomyDA

##Removing treated with metformin
#Metadata$Metformin <- ifelse(is.na(Metadata$Metformin), "Unknown", Metadata$Metformin)
Metadata2<-filter(Metadata, !Metformin == 1)
##Applying subsetting to OTU tables
Taxonomy2<-dplyr::select(Taxonomy2, one_of(as.character(Metadata2$MicrobiomeID)))
##Remove orgs that are not present after subsetting.
Taxonomy2 <- Taxonomy2[rowSums(Taxonomy2)>0,]

#Can also be run with metformin as covariate, but decided not to due to treatment follow
#diagnosis.
#Better to compare with analysis run with individuals receiving metformin removed.
#As performed here

#The factor can not be ordered for DESeq to run
```

```

Metadata2$Diagnosis<-factor(Metadata2$Diagnosis, ordered=FALSE)

#Create design formula
#design <- formula(paste("~ ", "Diagnosis", "+", "Metformin"))
design <- formula(paste("~ ", "Diagnosis", "+", "BMIq"))
#design <- formula(paste("~ ", "Diagnosis"))
#Create DESeq2 object with matrix and metadata
dds <- DESeqDataSetFromMatrix(countData = Taxonomy2,
                              colData = Metadata2,
                              design = design)

##Assess and calculate size factors using the different methods
SF<-data.frame(Ratio=sizeFactors(estimateSizeFactors(dds, type="ratio")),
              Poscounts=sizeFactors(estimateSizeFactors(dds, type="poscounts")),
              Iterate=sizeFactors(estimateSizeFactors(dds, type="poscounts")),
              #"iterate" takes a lot of time changed to "poscounts" but kept due to the
              #following code
              Relative=colSums(Taxonomy2)/mean(colSums(Taxonomy2))
              )
SF<-add_rownames(SF, var="MicrobiomeID")
#Adding total abundances
# old path path<-paste("Q:/",
#                       "Projects/",
#                       "LADA/",
#                       "LADA_Sandra_Evelina/",
#                       "LADA_JKV/",
#                       "LADA_R_AfterFlow_Analysis_FinalCounts/",
#                       "LADA_FinalCounts/",
#                       "2019-09-03_CountAnalysis.rds", sep="")

path <- paste("J:/",
              "CBMR/",
              "SUN-CBMR-Hansen-Group/",
              "Projects/",
              "LADA/",
              "LADA_Sandra_Evelina/",
              "LADA_JKV/",
              "LADA_R_AfterFlow_Analysis_FinalCounts/",
              "LADA_FinalCounts/",
              "2019-09-03_CountAnalysis.rds", sep="")

TotalCounts<-readRDS(path)
TotalCountsProcess <-
  data.frame(MicrobiomeID=TotalCounts$DF_Save_w$ID,
             CellNorm=TotalCounts$DF_Save_w$Cells_per_g_feces_FR_corrected_mean)
TotalCountsProcess$MicrobiomeID <- paste("L", TotalCountsProcess$MicrobiomeID,
                                         sep="")
SF2<-merge(SF, TotalCountsProcess, by="MicrobiomeID")

#One value is NaN in sample 602059 assigns value as average

```

```

SF2$CellNorm[is.nan(SF2$CellNorm)]<-mean(na.omit(SF2$CellNorm))

SF2$CellNormStand<-SF2$CellNorm/mean(SF2$CellNorm) #Watch out for NaN values can assign
#average, but wants the error

SF3<-merge(Metadata2, SF2, by="MicrobiomeID")
#DESeq divides with sizeFactor (High cell count should have low sizeFactor providing
#larger counts in a sample)
#Still have to consider seq data is relative
SF3$NormRelCell<-SF3$Relative/SF3$CellNormStand
#Overview of normalization factors
aggregate(SF3[, 14:20], list(SF3$Diagnosis), mean) #Have to run heatmap chunk adding sex

```

```

##   Group.1      Ratio Poscounts  Iterate  Relative   CellNorm CellNormStand
## 1 Control 1.093106  1.002662 1.002662 0.9644647 20384275367    1.0722125
## 2   T1D 1.232576  1.261833 1.261833 1.1097233 18731782275    0.9852914
## 3   LADA 1.203409  1.213468 1.213468 1.0061418 15590817082    0.8200767
## 4   T2D 1.079416  0.942112 0.942112 0.9618292 16982538343    0.8932812
##   NormRelCell
## 1    1.008584
## 2    1.247425
## 3    1.292202
## 4    1.183913

```

```

#to metadata
aggregate(SF3[, 14:20], list(SF3$Diagnosis), sd)

```

```

##   Group.1      Ratio Poscounts  Iterate  Relative   CellNorm CellNormStand
## 1 Control 0.4622606 0.2998114 0.2998114 0.2305348 6781846681    0.3567250
## 2   T1D 0.4965321 0.4582512 0.4582512 0.1825149 5712095609    0.3004561
## 3   LADA 0.5245937 0.4814438 0.4814438 0.1937037 4604942130    0.2422199
## 4   T2D 0.5152121 0.3336165 0.3336165 0.2220192 4888235680    0.2571211
##   NormRelCell
## 1    0.4800604
## 2    0.4881822
## 3    0.3379476
## 4    0.4797532

```

```

pairs(SF3[, c(14:17,19,20)], col=SF3$Diagnosis)

```

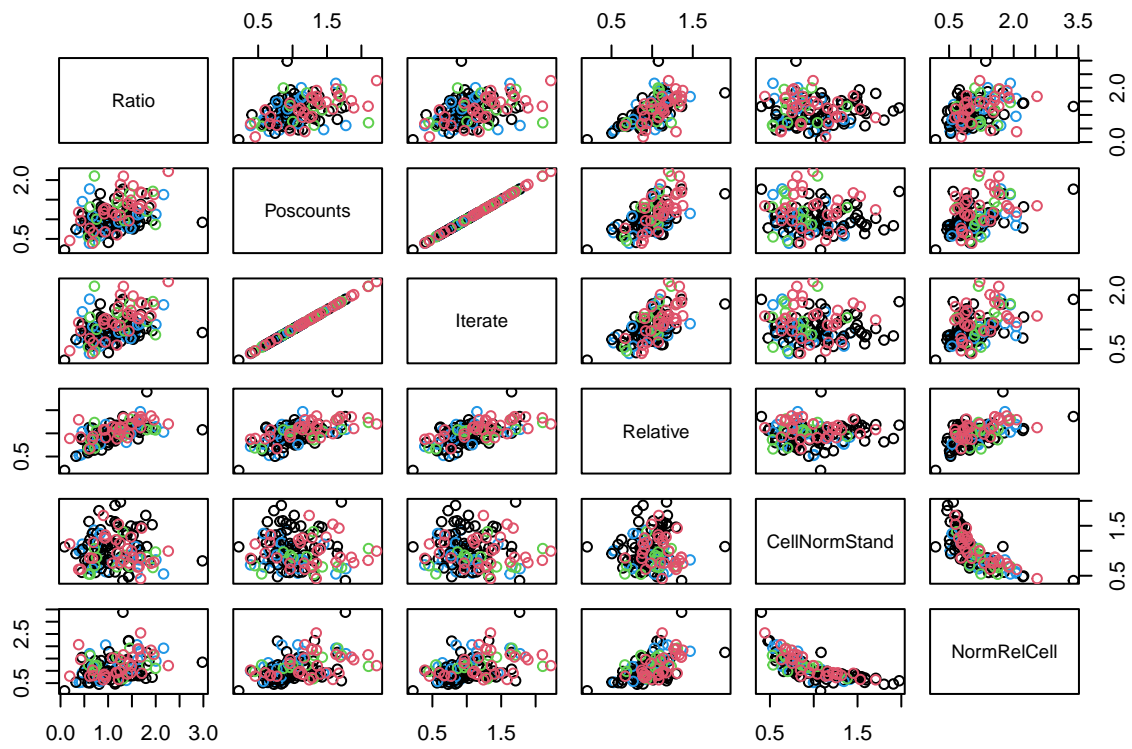

```
pairs(SF3[, c(15,17,19,20)], col=SF3$Diagnosis)
```

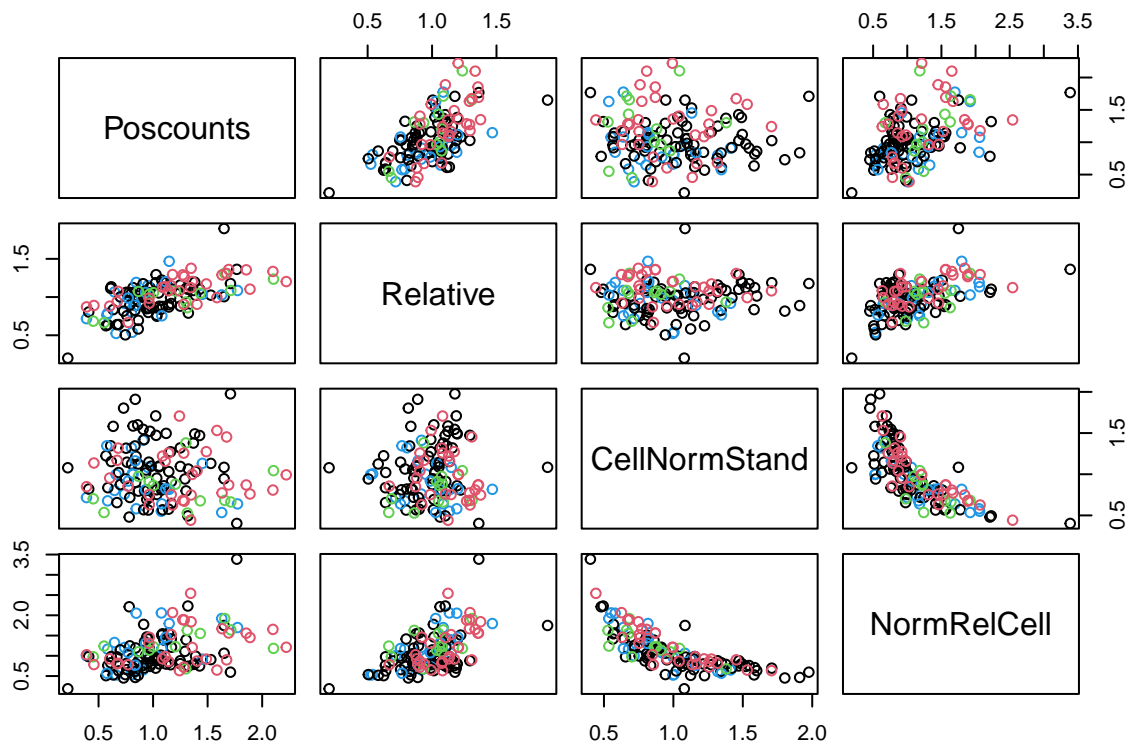

```
#I do want CellNormStand and NormRelCell to be negatively correlated due to DESeq divide
#with sizeFactor. It is also good that CellNormStand seems uncorrelated to the other
#normalization factors.
```

```
##Select size factors calculated above for normalization
dds@colData@listData$sizeFactor <- SF3[,20]
#hist(dds@colData@listData$sizeFactor)
#colnames(SF3[13])
normname<-colnames(SF3[20])

##See vignette for note on factor levels
#Filtering of the Counttable. Bare minimum is performed later. Also to reduce memory of
#the dds
dds2 <- dds[ rowSums(counts(dds))>50*length(Taxonomy2),] #Previously 0 instead of 1

#Estimate dispersions and fit the GLM
#dds2 <- DESeq(dds2, test="LRT", reduced = ~Metformin)
dds2 <- DESeq(dds2, test="LRT", reduced = ~1)

res<-results(dds2)
summary(res)
```

```
##
## out of 81 with nonzero total read count
```

```
## adjusted p-value < 0.1
## LFC > 0 (up)      : 3, 3.7%
## LFC < 0 (down)   : 3, 3.7%
## outliers [1]     : 0, 0%
## low counts [2]   : 0, 0%
## (mean count < 48)
## [1] see 'cooksCutoff' argument of ?results
## [2] see 'independentFiltering' argument of ?results
```

```
resultsNames(dds2)
```

```
## [1] "Intercept"          "Diagnosis_T1D_vs_Control"
## [3] "Diagnosis_LADA_vs_Control" "Diagnosis_T2D_vs_Control"
## [5] "BMIq"
```

```
##MA plots from inbuilt DESeq function
plotMA(dds2, alpha=0.1)
```

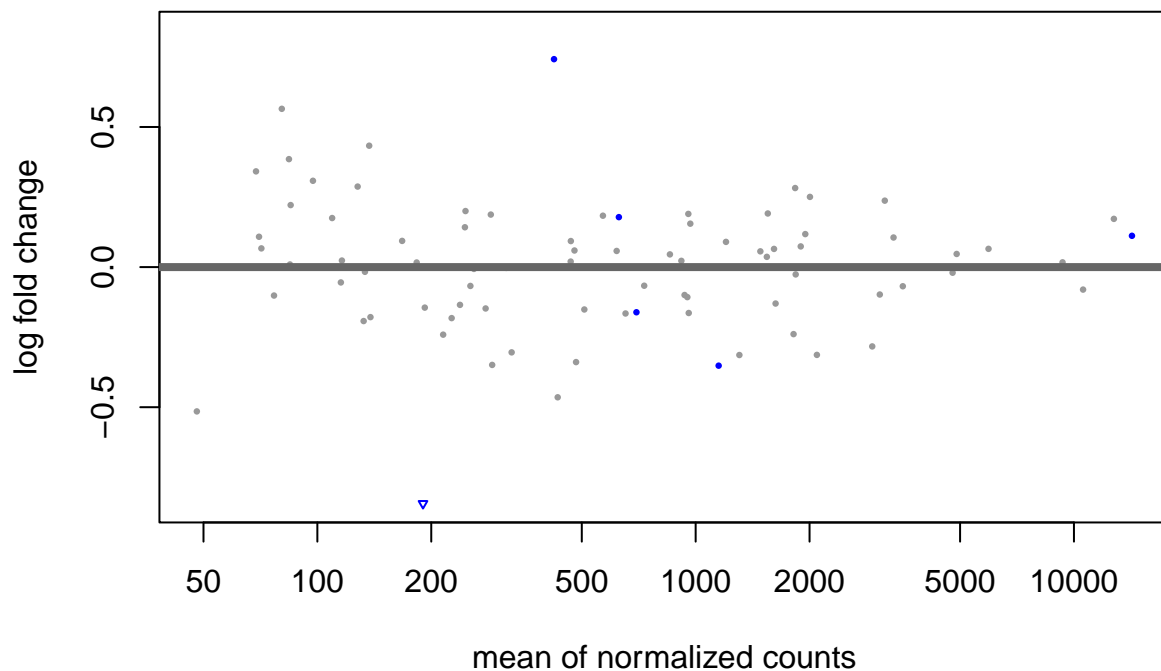

```
plotMA(res, ylim=c(-2,2))
```



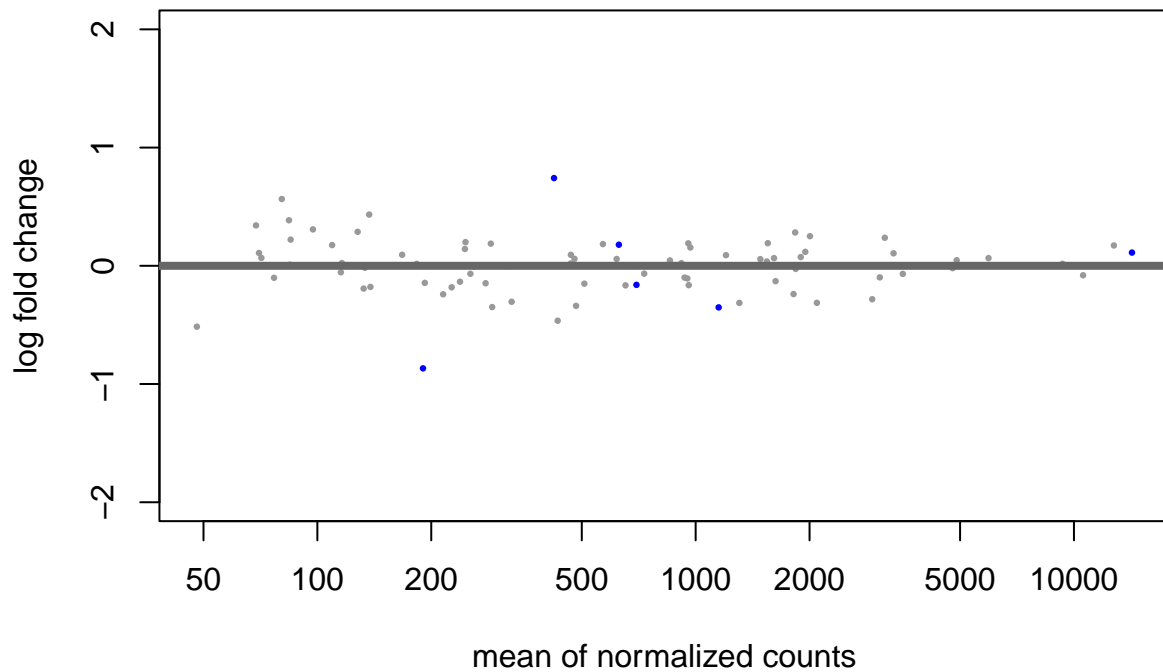

```
#Unshrunken/shrunken
#res<-results(dds2, addMLE=TRUE)
#resLFC <- DESeq2::lfcShrink(dds2, coef=2)
#resLFC
#DESeq2::plotMA(resLFC, ylim=c(-2,2))

#Make histogram
#pdf(paste("HistogramDESeq", ".pdf", sep=""), height=6, width=12)
hist(res$pvalue[res$baseMean > 1], breaks = 0:20/20,
      col = "grey50", border = "white")
```

## Histogram of res\$pvalue[res\$baseMean > 1]

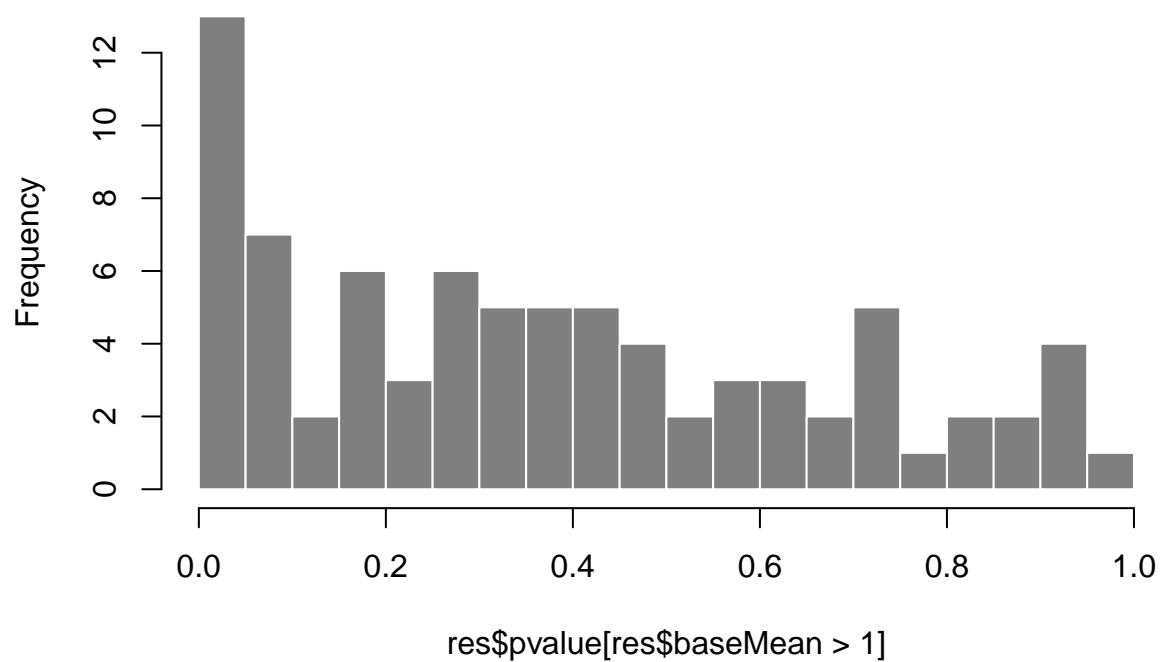

```
#dev.off()
```

```
#Show dispersion plot with shrinkage
```

```
#pdf(paste("DispersionplotDESeq", ".pdf", sep=""), height=9, width=12)
```

```
plotDispEsts(dds2)
```

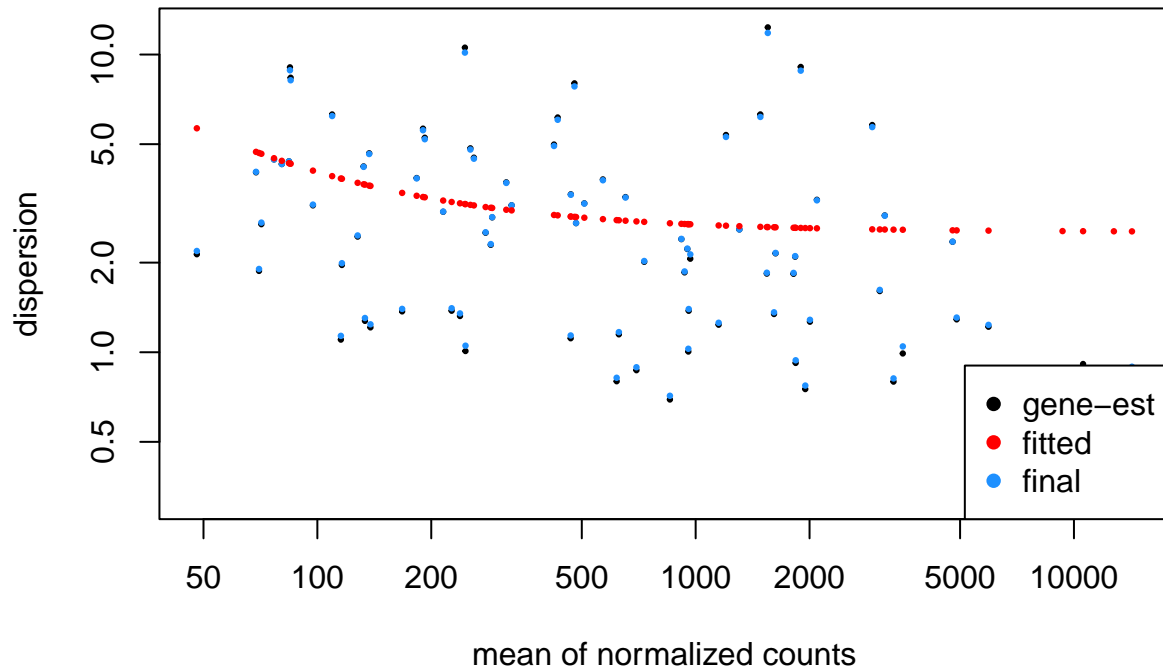

```
#dev.off()

##Plot PCA
#dds2_rlog<-rlogTransformation(dds2)
##pdf(paste("PCADESeq", ".pdf", sep=""), height=9, width=9)
#plotPCA(dds2_rlog, intgroup=c("Diagnosis))+coord_fixed()
##dev.off()

#Data structuring
resSig=subset(res, pvalue<0.05) #Could also have selected other value or padj
df <- data.frame(res)
dfSig <- data.frame(resSig)

#Save table.
write.table(dfSig, file="DESeq_SigLRTRemMet.txt", sep="\t", dec=",", row.names = T)
print("Significant LRT")
```

```
## [1] "Significant LRT"
```

```
kable(dfSig)
```

|                         | baseMean  | log2FoldChange | lfcSE     | stat     | pvalue    | padj      |
|-------------------------|-----------|----------------|-----------|----------|-----------|-----------|
| Family.Eggerthellaceae. | 507.82344 | -0.1512598     | 0.2120578 | 11.66578 | 0.0200176 | 0.1474022 |

|                      | baseMean    | log2FoldChange | lfcSE     | stat     | pvalue    | padj      |
|----------------------|-------------|----------------|-----------|----------|-----------|-----------|
| Alistipes            | 2005.08084  | 0.2504997      | 0.1352641 | 10.15503 | 0.0378957 | 0.2361191 |
| Parabacteroides      | 1150.20068  | -0.3518096     | 0.1337562 | 21.15970 | 0.0002944 | 0.0198638 |
| Streptococcus        | 1626.63392  | -0.1300053     | 0.1751785 | 10.16914 | 0.0376729 | 0.2361191 |
| GCA.900066575        | 48.01925    | -0.5149756     | 0.1775909 | 11.87897 | 0.0182743 | 0.1474022 |
| Lachnoclostridium    | 626.64815   | 0.1782757      | 0.1290445 | 17.73651 | 0.0013893 | 0.0225072 |
| Roseburia            | 1611.25968  | 0.0648992      | 0.1392521 | 11.78944 | 0.0189877 | 0.1474022 |
| Butyricoccus         | 854.99157   | 0.0453647      | 0.1008986 | 13.38095 | 0.0095569 | 0.1105869 |
| Faecalibacterium     | 14234.24963 | 0.1116576      | 0.1127932 | 14.14663 | 0.0068415 | 0.0923601 |
| Ruminiclostridium_5  | 697.42166   | -0.1612049     | 0.1126770 | 20.03971 | 0.0004905 | 0.0198638 |
| Ruminiclostridium_6  | 289.80533   | -0.3490619     | 0.2012804 | 12.13863 | 0.0163496 | 0.1474022 |
| Veillonella          | 190.21664   | -0.8673058     | 0.2820774 | 17.86563 | 0.0013110 | 0.0225072 |
| Escherichia/Shigella | 422.24727   | 0.7420216      | 0.2649870 | 18.22389 | 0.0011157 | 0.0225072 |

## DESeq Wald

All pairwise Differential abundance analysis comparison (DESeq and visualized venn)

```
rm(list=setdiff(ls(), c("Metadata", "MetadataMed", "Feature", "TaxonomyDA", "Taxonomy", "Fig2List")))

#Reassign names
Metadata2<-Metadata
#Order Diagnosis
Metadata2$Diagnosis<-ordered(Metadata2$Diagnosis,
                             levels=c("Control", "T1D", "T2D", "LADA"))
#Included filtering
Taxonomy2<-TaxonomyDA
#Taxonomy2<-Taxonomy[length(Taxonomy)-rowSums(Taxonomy == 0) >= 30,]

#The factor can not be ordered for DESeq to run
Metadata2$Diagnosis<-factor(Metadata2$Diagnosis, ordered=FALSE)

#Create design formula
#design <- formula(paste("~ ", "Diagnosis"))
design <- formula(paste("~ ", "Diagnosis", "+", "BMIq"))
#design <- formula(paste("~ ", "Diagnosis", "+ Metformin"))
#Create DESeq2 object with matrix and metadata
dds <- DESeqDataSetFromMatrix(countData = Taxonomy2,
                              colData = Metadata2,
                              design = design)

##Assess and calculate size factors using the different methods
SF<-data.frame(Ratio=sizeFactors(estimateSizeFactors(dds, type="ratio")),
              Poscounts=sizeFactors(estimateSizeFactors(dds, type="poscounts")),
              # "iterate" takes a lot of time changed to "poscounts" but kept due to the
              # following code
              Iterate=sizeFactors(estimateSizeFactors(dds, type="poscounts")),
              Relative=colSums(Taxonomy2)/mean(colSums(Taxonomy2))
              )
SF<-add_rownames(SF, var="MicrobiomeID")
```

```

#Adding total abundances
# old path path<-paste("Q:/",
#                       "Projects/",
#                       "LADA/",
#                       "LADA_Sandra_Evelina/",
#                       "LADA_JKV/",
#                       "LADA_R_AfterFlow_Analysis_FinalCounts/",
#                       "LADA_FinalCounts/",
#                       "2019-09-03_CountAnalysis.rds", sep="")

path <- paste("J:/",
              "CBMR/",
              "SUN-CBMR-Hansen-Group/",
              "Projects/",
              "LADA/",
              "LADA_Sandra_Evelina/",
              "LADA_JKV/",
              "LADA_R_AfterFlow_Analysis_FinalCounts/",
              "LADA_FinalCounts/",
              "2019-09-03_CountAnalysis.rds", sep="")

TotalCounts<-readRDS(path)
TotalCountsProcess <-
  data.frame(MicrobiomeID=TotalCounts$DF_Save_w$ID,
             CellNorm=TotalCounts$DF_Save_w$Cells_per_g_feces_FR_corrected_mean)
TotalCountsProcess$MicrobiomeID <- paste("L", TotalCountsProcess$MicrobiomeID,
                                         sep="")
SF2<-merge(SF, TotalCountsProcess, by="MicrobiomeID")

#One value is NaN in sample 602059 assigns value as average
SF2$CellNorm[is.nan(SF2$CellNorm)]<-mean(na.omit(SF2$CellNorm))

SF2$CellNormStand<-SF2$CellNorm/mean(SF2$CellNorm) #Watch out for NaN values can assign
#average, but wants the error

SF3<-merge(Metadata2, SF2, by="MicrobiomeID")
#DESeq divides with sizeFactor (High cell count should have low sizeFactor providing
#larger counts in a sample)
#Still have to consider seq data is relative
SF3$NormRelCell<-SF3$Relative/SF3$CellNormStand
#Overview of normalization factors
aggregate(SF3[, 14:20], list(SF3$Diagnosis), mean) #Have to run heatmap chunk adding sex

```

```

Group.1 Ratio Poscounts Iterate Relative CellNorm CellNormStand 1 Control 1.021277 1.0816841 1.0816841
1.0024242 20384275367 1.0420944 2 T1D 1.189194 1.3530621 1.3530621 1.1533999 18731782275 0.9576149 3
T2D 1.102417 0.9754019 0.9754019 0.9631018 19624620327 1.0032590 4 LADA 1.154124 1.0508265 1.0508265
0.9635197 18940404238 0.9682802 NormRelCell 1 1.078577 2 1.333993 3 1.076697 4 1.069666

```

```

#to metadata
aggregate(SF3[, 14:20], list(SF3$Diagnosis), sd)

```

```

Group.1 Ratio Poscounts Iterate Relative CellNorm CellNormStand 1 Control 0.5077220 0.3258182
0.3258182 0.2396082 6781846681 0.3467047 2 T1D 0.3607959 0.4887817 0.4887817 0.1896984 5712095609
0.2920164 3 T2D 0.4568660 0.3704665 0.3704665 0.2075670 6146706989 0.3142348 4 LADA 0.5115578

```

0.4411272 0.4411272 0.2136868 5544046390 0.2834253 NormRelCell 1 0.5133752 2 0.5220606 3 0.4836133 4  
0.3592809

```
pairs(SF3[, c(14:17,19,20)], col=SF3$Diagnosis)
```

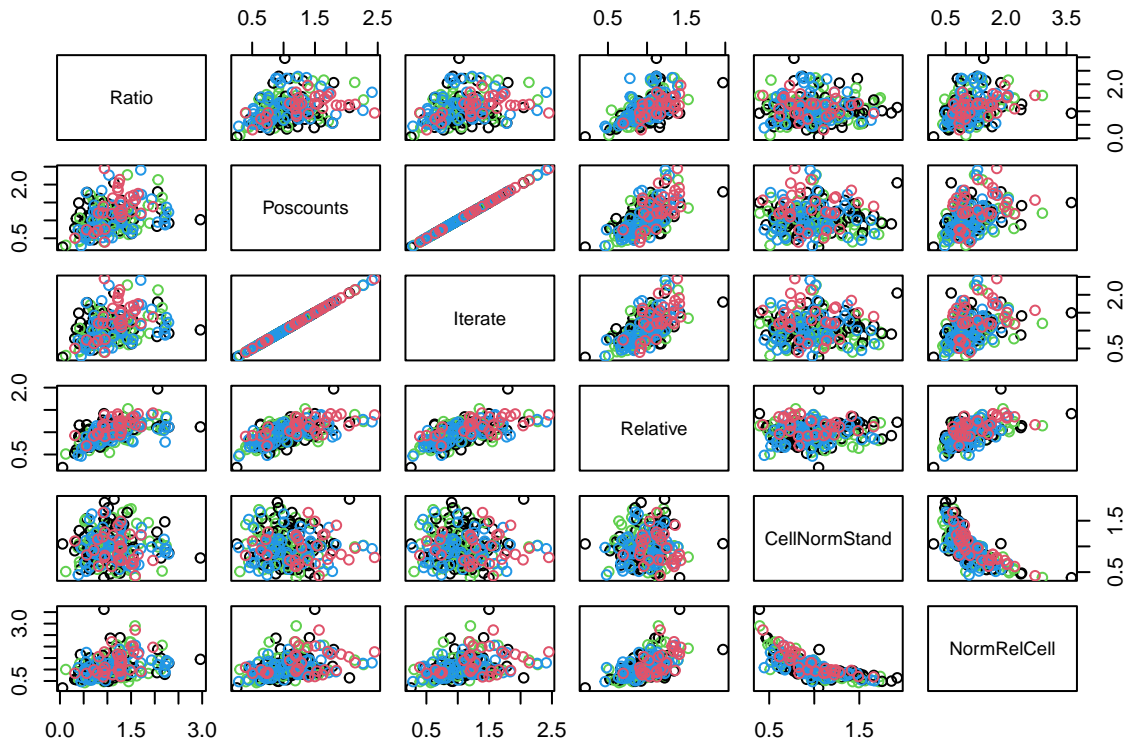

```
pairs(SF3[, c(15,17,19,20)], col=SF3$Diagnosis)
```

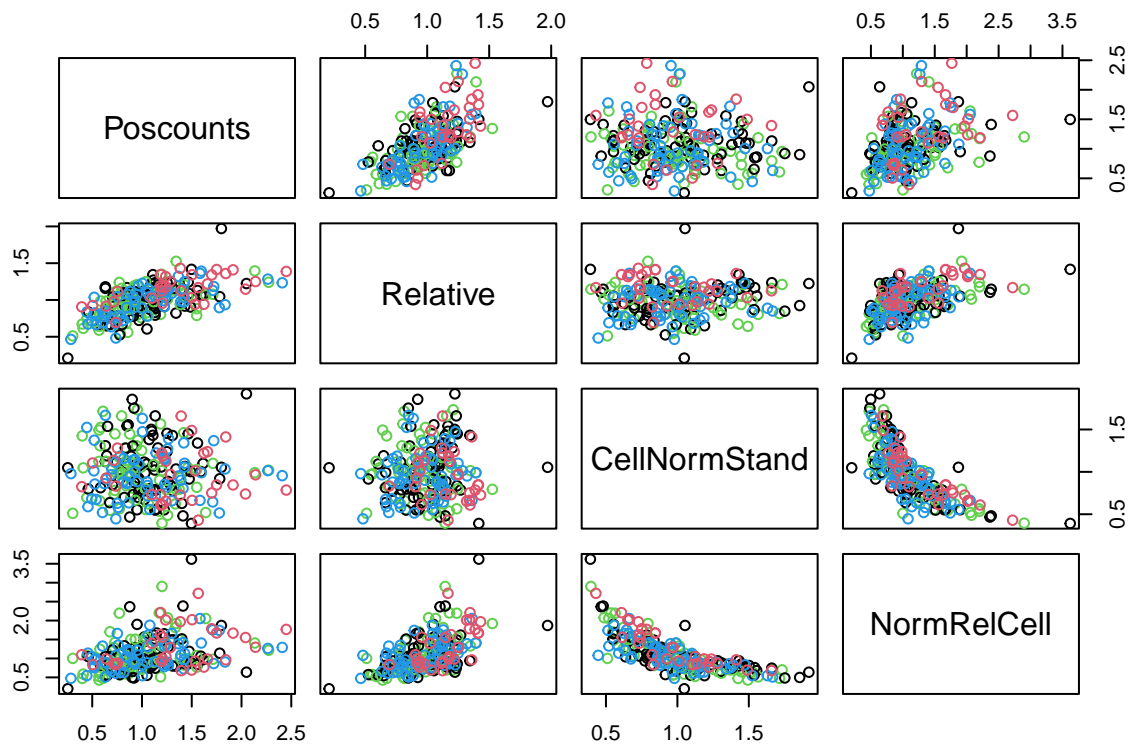

```

#I do want CellNormStand and NormRelCell to be negatively correlated due to DESeq divide
#with sizeFactor.
#It is also good that CellNormStand seems uncorrelated to the other normalization factors.

##Select size factors calculated above for normalization
dds@colData@listData$sizeFactor <- SF3[,20]

##See vignette for note on factor levels
#Filtering of the Counttable. Bare minimum is performed later. Also to reduce memory of
#the dds
dds <- dds[ rowSums(counts(dds))>(50*length(Taxonomy2)),] #Previously 0 instead of 1

#Estimate dispersions and fit the GLM
dds <- DESeq(dds)

res<-results(dds)
summary(res)

```

out of 82 with nonzero total read count adjusted p-value < 0.1 LFC > 0 (up) : 2, 2.4% LFC < 0 (down) : 2, 2.4% outliers [1] : 0, 0% low counts [2] : 0, 0% (mean count < 49) [1] see 'cooksCutoff' argument of ?results [2] see 'independentFiltering' argument of ?results

```
resultsNames(dds)
```

```
[1] "Intercept" "Diagnosis_T1D_vs_Control" [3] "Diagnosis_T2D_vs_Control" "Diagnosis_LADA_vs_Control"  
[5] "BMIq"
```

```
#Threshold for FDR-adjusted p-values  
padj_threshold <- 0.1  
  
if (is.factor(colData(dds)[,"Diagnosis"]) == TRUE) {  
  
  #Find all two-wise combinations of levels in chosen test factor  
  test <- combn(levels(colData(dds)[,"Diagnosis"]), 2)  
  test[,3]<-c("LADA", "Control") #Want LADA first  
  test[,5]<-c("LADA", "T1D") #Want LADA first  
  test[,6]<-c("LADA", "T2D") #Want LADA first  
  foo = test[1,]  
  poo = test[2,]  
  
  #Do DESeq2 analysis on all combinations of levels and save as list  
  result <- vector("list",length(foo))  
  for (i in 1:length(foo) ) {  
    for (j in 1:length(poo)) {  
      result[i] = results(dds, contrast = c("Diagnosis" ,foo[i], poo[i]))  
    }  
  }  
  
  #Produce output tables with significant taxa from each comparison  
  res_list <- vector("list",length(foo))  
  for (i in 1:length(result) ) {  
    res_stat <- data.frame(result[i])  
    res_stat <- res_stat[is.na(res_stat$pvalue) == FALSE,]  
    stat_sig <- na.omit(res_stat[res_stat$padj < padj_threshold,])  
    res_stat$gene <- rownames(res_stat)  
    res_stat$g1 <- test[1,i]  
    res_stat$g2 <- test[2,i]  
    res_stat$compare <- paste(test[1,i], "vs", test[2,i])  
    res_list[i] <- list(res_stat)  
  }  
  
  res_stat <- do.call('rbind', res_list)  
  rownames(res_stat) <- 1:nrow(res_stat)  
  res_stat <- res_stat[with(res_stat, order(padj, pvalue, abs(log2FoldChange))),]  
  stat_sig <- na.omit(res_stat[res_stat$padj < padj_threshold,])  
}  
  
if (is.numeric(colData(dds)[,"Diagnosis"]) == TRUE) {  
  
  res_stat <- data.frame((results(dds)))  
  res_stat$maxCooks <- apply(assays(dds)[["cooks"]], 1, max)  
  res_stat <- res_stat[is.na(res_stat$pvalue) == FALSE,]  
  res_stat <- res_stat[with(res_stat, order(padj, pvalue, abs(log2FoldChange))), ]  
  res_stat$gene <- rownames(res_stat)  
  max_cooks <- quantile(na.omit(res_stat$maxCooks), cooks_quantile_cutoff)  
  stat_sig <-  
    na.omit(res_stat[res_stat$padj < padj_threshold & res_stat$maxCooks < max_cooks,])  
}
```



```

#All comparisons
write.table(res_stat, file="DESeqRes_Orgs.txt", quote = F, row.names = F, sep="\t")

#Significant taxa in table
if (nrow(stat_sig) > 0) {
kable(stat_sig, row.names = F)
write.table(stat_sig, file="DESeqRes_SigOrgs.txt", quote = F, row.names = F, sep="\t")
} else {
print("No significant taxa were found.")
}
print("Significant Wald")

```

[1] "Significant Wald"

```
kable(stat_sig)
```

|     | baseMean    | log2FoldChange | lfcSE     | stat     | pvalue    | padj      | gene                       | g1      | g2      | compare         |
|-----|-------------|----------------|-----------|----------|-----------|-----------|----------------------------|---------|---------|-----------------|
| 407 | 1334.40881  | 3.6657267      | 0.6670495 | 5.495438 | 0.0000000 | 0.0000033 | Escherichia/Shigella       | LADA    | T1D     | LADA vs T1D     |
| 243 | 1334.40881  | 2.7557712      | 0.5289805 | 5.209594 | 0.0000002 | 0.0000155 | Escherichia/Shigella       | LADA    | Control | LADA vs Control |
| 319 | 265.43054   | -              | 0.9396150 | -        | 0.0000014 | 0.0001112 | Veillonella                | T1D     | T2D     | T1D vs T2D      |
|     |             | 4.5396043      |           | 4.831345 |           |           |                            |         |         |                 |
| 325 | 1334.40881  | -              | 0.6711965 | -        | 0.0000035 | 0.0001448 | Escherichia/Shigella       | T1D     | T2D     | T1D vs T2D      |
|     |             | 3.1124702      |           | 4.637197 |           |           |                            |         |         |                 |
| 289 | 941.98315   | -              | 0.2787381 | -        | 0.0000090 | 0.0002473 | Butyricoccus               | T1D     | T2D     | T1D vs T2D      |
|     |             | 1.2372614      |           | 4.438796 |           |           |                            |         |         |                 |
| 261 | 1113.74127  | -              | 0.3749662 | -        | 0.0000360 | 0.0007384 | Parabacteroides            | T1D     | T2D     | T1D vs T2D      |
|     |             | 1.5492262      |           | 4.131643 |           |           |                            |         |         |                 |
| 161 | 1334.40881  | -              | 0.5349798 | -        | 0.0000384 | 0.0031478 | Escherichia/Shigella       | Control | T2D     | Control vs T2D  |
|     |             | 2.2025147      |           | 4.117005 |           |           |                            |         |         |                 |
| 277 | 780.88361   | -              | 0.3657440 | -        | 0.0002349 | 0.0038521 | Lachnospiraceae            | T1D     | T2D     | T1D vs T2D      |
|     |             | 1.3452813      |           | 3.678205 |           |           |                            |         |         |                 |
| 113 | 780.88361   | -              | 0.2915573 | -        | 0.0003741 | 0.0153388 | Lachnospiraceae            | Control | T2D     | Control vs T2D  |
|     |             | 1.0372730      |           | 3.557699 |           |           |                            |         |         |                 |
| 371 | 941.98315   | 0.9528609      | 0.2770233 | 3.439643 | 0.0005825 | 0.0238817 | Butyricoccus               | LADA    | T1D     | LADA vs T1D     |
| 412 | 48.68949    | 0.9942958      | 0.2751489 | 3.613665 | 0.0003019 | 0.0247557 | Actinomyces                | LADA    | T2D     | LADA vs T2D     |
| 227 | 87.35346    | 1.1110681      | 0.3310424 | 3.356271 | 0.0007900 | 0.0323904 | UBA1819                    | LADA    | Control | LADA vs Control |
| 208 | 12297.06909 | -              | 0.3019667 | -        | 0.0029970 | 0.0641923 | Faecalibacterium           | LADA    | Control | LADA vs Control |
|     |             | 0.8962497      |           | 2.968041 |           |           |                            |         |         |                 |
| 199 | 705.55318   | -              | 0.4429952 | -        | 0.0034815 | 0.0641923 | Lachnospiraceae_NK4A204    | LADA    | Control | LADA vs Control |
|     |             | 1.2942909      |           | 2.921681 |           |           |                            |         |         |                 |
| 213 | 649.613390  | 0.7179311      | 0.2519946 | 2.848995 | 0.0043858 | 0.0641923 | Ruminiclostridium_5        | LADA    | Control | LADA vs Control |
| 235 | 56.39729    | 1.2954165      | 0.4651192 | 2.785128 | 0.0053507 | 0.0641923 | Family.Erysipelotrichaceae | LADA    | Control | LADA vs Control |
| 166 | 48.68949    | 0.7612893      | 0.2760578 | 2.757717 | 0.0058207 | 0.0641923 | Actinomyces                | LADA    | Control | LADA vs Control |

|     | baseMean    | log2FoldChange | logSE     | stat     | pvalue    | padj      | gene                          | g1      | g2      | compare         |
|-----|-------------|----------------|-----------|----------|-----------|-----------|-------------------------------|---------|---------|-----------------|
| 203 | 1431.19573  | -              | 0.3429058 | -        | 0.0062627 | 0.0641923 | Roseburia                     | LADA    | Control | LADA vs Control |
|     | 0.9374024   |                |           |          | 2.733702  |           |                               |         |         |                 |
| 196 | 213.93756   | -              | 0.4276126 | -        | 0.0072854 | 0.0663784 | Lachnospira                   | LADA    | Control | LADA vs Control |
|     | 1.1475016   |                |           |          | 2.683507  |           |                               |         |         |                 |
| 344 | 1062.10262  | 2.6072896      | 0.8657023 | 0.011761 | 0.0025974 | 0.0676607 | Lactobacillus                 | LADA    | T1D     | LADA vs T1D     |
| 346 | 1347.24525  | -              | 0.4896864 | -        | 0.0033005 | 0.0676607 | Christensenellaceae_R.7_group | LADA    | T1D     | LADA vs T1D     |
|     | 1.4388295   |                |           |          | 2.938267  |           |                               |         |         |                 |
| 43  | 941.98315   | 0.8272636      | 0.2674793 | 0.092810 | 0.0019827 | 0.0905858 | Butyricoccus                  | Control | T1D     | Control vs T1D  |
| 39  | 1431.19573  | 1.2775012      | 0.4174103 | 0.060536 | 0.0022094 | 0.0905858 | Roseburia                     | Control | T1D     | Control vs T1D  |
| 194 | 2986.10151  | -              | 0.3034354 | -        | 0.0118524 | 0.0971897 | Fusicatenibacter              | LADA    | Control | LADA vs Control |
|     | 0.7635978   |                |           |          | 2.516509  |           |                               |         |         |                 |
| 44  | 12297.06909 | 0.694890       | 0.3675672 | 0.909639 | 0.0036185 | 0.0989047 | Faecalibacterium              | Control | T1D     | Control vs T1D  |

```
kable(stat_sig[,c(5:7,10)])
```

|     | pvalue    | padj      | gene                          | compare         |
|-----|-----------|-----------|-------------------------------|-----------------|
| 407 | 0.0000000 | 0.0000032 | Escherichia/Shigella          | LADA vs T1D     |
| 243 | 0.0000002 | 0.0000155 | Escherichia/Shigella          | LADA vs Control |
| 319 | 0.0000014 | 0.0001112 | Veillonella                   | T1D vs T2D      |
| 325 | 0.0000035 | 0.0001448 | Escherichia/Shigella          | T1D vs T2D      |
| 289 | 0.0000090 | 0.0002473 | Butyricoccus                  | T1D vs T2D      |
| 261 | 0.0000360 | 0.0007384 | Parabacteroides               | T1D vs T2D      |
| 161 | 0.0000384 | 0.0031474 | Escherichia/Shigella          | Control vs T2D  |
| 277 | 0.0002349 | 0.0038521 | Lachnospiraceae               | T1D vs T2D      |
| 113 | 0.0003741 | 0.0153388 | Lachnospiraceae               | Control vs T2D  |
| 371 | 0.0005825 | 0.0238817 | Butyricoccus                  | LADA vs T1D     |
| 412 | 0.0003019 | 0.0247557 | Actinomyces                   | LADA vs T2D     |
| 227 | 0.0007900 | 0.0323904 | UBA1819                       | LADA vs Control |
| 208 | 0.0029970 | 0.0641923 | Faecalibacterium              | LADA vs Control |
| 199 | 0.0034815 | 0.0641923 | Lachnospiraceae_NK4A136_group | LADA vs Control |
| 213 | 0.0043858 | 0.0641923 | Ruminiclostridium_5           | LADA vs Control |
| 235 | 0.0053507 | 0.0641923 | Family.Erysipelotrichaceae.   | LADA vs Control |
| 166 | 0.0058207 | 0.0641923 | Actinomyces                   | LADA vs Control |
| 203 | 0.0062627 | 0.0641923 | Roseburia                     | LADA vs Control |
| 196 | 0.0072854 | 0.0663784 | Lachnospira                   | LADA vs Control |
| 344 | 0.0025974 | 0.0676607 | Lactobacillus                 | LADA vs T1D     |
| 346 | 0.0033005 | 0.0676607 | Christensenellaceae_R.7_group | LADA vs T1D     |
| 43  | 0.0019827 | 0.0905858 | Butyricoccus                  | Control vs T1D  |
| 39  | 0.0022094 | 0.0905858 | Roseburia                     | Control vs T1D  |
| 194 | 0.0118524 | 0.0971897 | Fusicatenibacter              | LADA vs Control |
| 44  | 0.0036185 | 0.0989047 | Faecalibacterium              | Control vs T1D  |

```
##Venn diagram comparing LADA to other groups
sig_LADA <- subset(stat_sig, g1=="LADA")
sig_LADA_T1D <- subset(sig_LADA, g2=="T1D") %>% dplyr::select(one_of("gene")) %>%
```

```

pull(gene)
sig_LADA_T2D <- subset(sig_LADA, g2=="T2D") %>% dplyr::select(one_of("gene")) %>%
  pull(gene)
sig_LADA_Control <- subset(sig_LADA, g2=="Control") %>% dplyr::select(one_of("gene")) %>%
  pull(gene)

#Colors
myCol <- c( "#1F78B4", "#33A02C", "#666666")
#
temp <- venn.diagram(list(T1D = sig_LADA_T1D,
                        T2D = sig_LADA_T2D,
                        Control = sig_LADA_Control), filename = NULL,

# Circles
lwd = 2,
lty = 'blank',
fill = myCol,

# Numbers
cex = 3,
fontface = "bold",
fontfamily = "sans",

# Set names
cat.cex = 3,
cat.fontface = "bold",
cat.default.pos = "outer",
cat.pos = c(0, 0, 0),
cat.dist = c(0.085, 0.085, 0.024),
cat.fontfamily = "sans",
rotation = 1)

grid.arrange(gTree(children=temp))

```

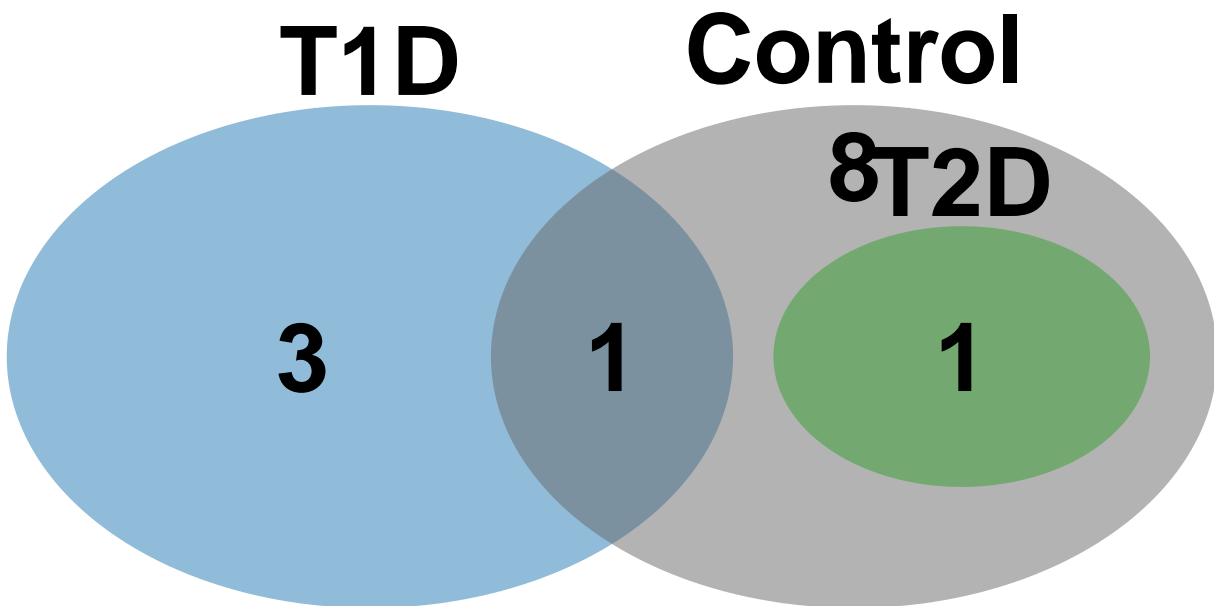

```
Fig2List[[ "VennLADA" ]] <-
  gTree(children=temp, top="N differential abundant relative to LADA")
```

```
#Genera LADA that are significantly different from all other groups
intersect(intersect(sig_LADA_T1D,sig_LADA_T2D),sig_LADA_Control)
```

```
character(0)
```

```
##Venn diagram comparing T1D to other groups
sig_T1D <- subset(stat_sig, g1=="T1D" | g2=="T1D")
sig_T1D_LADA <- subset(sig_T1D, g1=="LADA") %>% dplyr::select(one_of("gene")) %>%
  pull(gene)
sig_T1D_T2D <- subset(sig_T1D, g2=="T2D") %>% dplyr::select(one_of("gene")) %>%
  pull(gene)
sig_T1D_Control <- subset(sig_T1D, g1=="Control") %>% dplyr::select(one_of("gene")) %>%
  pull(gene)
#Colors
myCol <- c( "#E31A1C", "#33A02C", "#666666" )
#
temp <- venn.diagram(list(LADA = sig_T1D_LADA,
                        T2D = sig_T1D_T2D,
                        Control = sig_T1D_Control), filename = NULL,

# Circles
lwd = 2,
```

```

lty = 'blank',
fill = myCol,

# Numbers
cex = 2,
fontface = "bold",
fontfamily = "sans",

# Set names
cat.cex = 2,
cat.fontface = "bold",
cat.default.pos = "outer",
cat.pos = c(0, 0, 0),
cat.dist = c(0.055, 0.055, 0.024),
cat.fontfamily = "sans",
rotation = 1)

```

```
grid.arrange(gTree(children=temp))
```

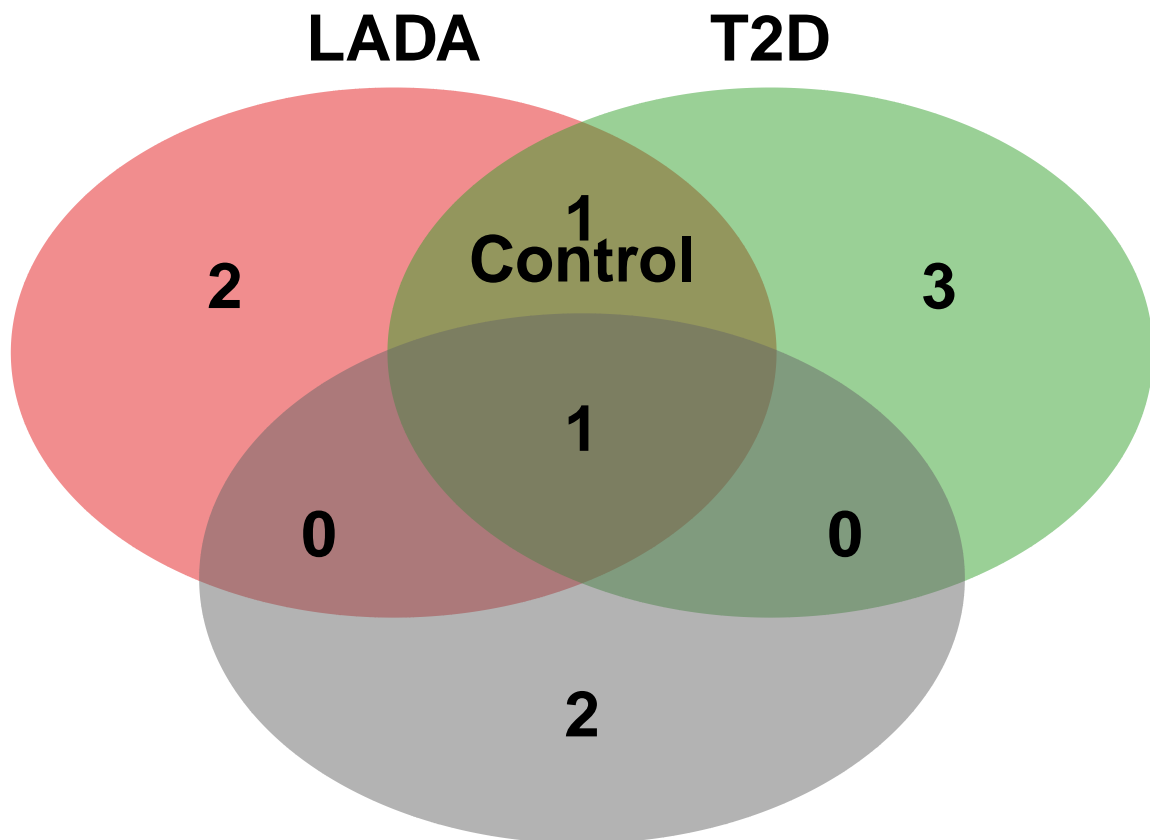

```

Fig2List[[ "VennT1D" ]] <-
  gTree(children=temp, top="N differential abundant relative to T1D")

```

```

#Genera T1D that are significantly different from all other groups
intersect(intersect(sig_T1D_LADA,sig_T1D_T2D),sig_T1D_Control)

```

[1] "Butyricococcus"

```
##Venn diagram comparing T2D to other groups
sig_T2D <- subset(stat_sig, g1=="T2D" | g2=="T2D")
sig_T2D_LADA <- subset(sig_T2D, g1=="LADA") %>% dplyr::select(one_of("gene")) %>%
  pull(gene)
sig_T2D_T1D <- subset(sig_T2D, g1=="T1D") %>% dplyr::select(one_of("gene")) %>%
  pull(gene)
sig_T2D_Control <- subset(sig_T2D, g1=="Control") %>% dplyr::select(one_of("gene")) %>%
  pull(gene)
#Colors
myCol <- c( "#E31A1C", "#1F78B4", "#666666")
#
temp <- venn.diagram(list(LADA = sig_T2D_LADA,
                        T1D = sig_T2D_T1D,
                        Control = sig_T2D_Control), filename = NULL,

                    # Circles
                    lwd = 2,
                    lty = 'blank',
                    fill = myCol,

                    # Numbers
                    cex = 2,
                    fontface = "bold",
                    fontfamily = "sans",

                    # Set names
                    cat.cex = 2,
                    cat.fontface = "bold",
                    cat.default.pos = "outer",
                    cat.pos = c(0, 0, 0),
                    cat.dist = c(0.055, 0.055, 0.024),
                    cat.fontfamily = "sans",
                    rotation = 1)

grid.arrange(gTree(children=temp))
```

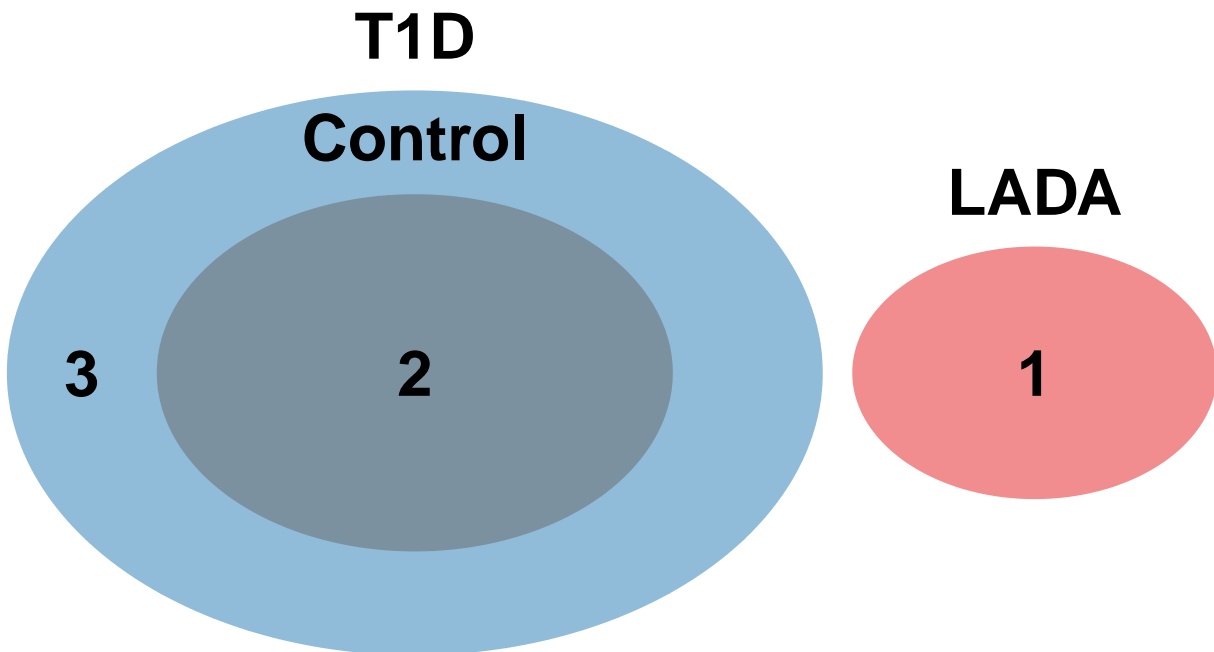

```
Fig2List[[ "VennT2D" ]] <-
  gTree(children=temp, top="N differential abundant relative to T2D")
```

```
#Genera T2D that are significantly different from all other groups
intersect(intersect(sig_T2D_LADA,sig_T2D_T1D),sig_T2D_Control)
```

```
character(0)
```

```
##Venn diagram comparing controls to other groups
```

```
sig_Control <- subset(stat_sig, g1=="Control" | g2=="Control")
sig_Control_LADA <- subset(sig_Control, g1=="LADA") %>% dplyr::select(one_of("gene")) %>%
  pull(gene)
```

```
sig_Control_T1D <- subset(sig_Control, g2=="T1D") %>% dplyr::select(one_of("gene")) %>%
  pull(gene)
```

```
sig_Control_T2D <- subset(sig_Control, g2=="T2D") %>% dplyr::select(one_of("gene")) %>%
  pull(gene)
```

```
#Colors
```

```
myCol <- c( "#E31A1C", "#1F78B4", "#33A02C")
```

```
#
```

```
temp <- venn.diagram(list(LADA = sig_Control_LADA,
                        T1D = sig_Control_T1D,
                        T2D = sig_Control_T2D), filename = NULL,
```

```
# Circles
```

```
lwd = 2,
```

```

lty = 'blank',
fill = myCol,

# Numbers
cex = 3,
fontface = "bold",
fontfamily = "sans",

# Set names
cat.cex = 3,
cat.fontface = "bold",
cat.default.pos = "outer",
cat.pos = c(0, 0, 0),
cat.dist = c(0.055, 0.055, 0.024),
cat.fontfamily = "sans",
rotation = 1)

```

```
grid.arrange(gTree(children=temp))
```

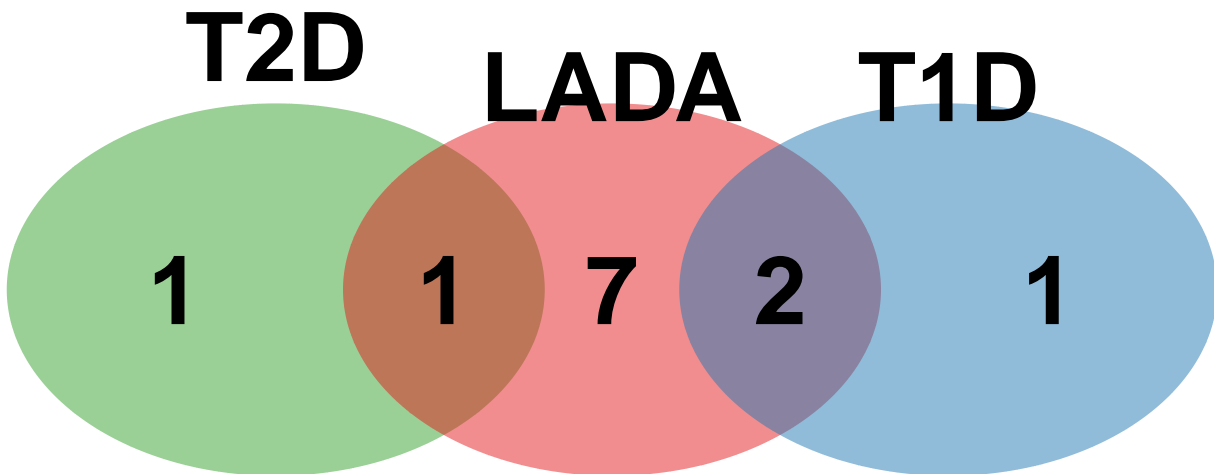

```

Fig2List[[ "VennControls" ]] <-
  gTree(children=temp, top="N differential abundant relative to controls")

```

```

#Genera Controls that are significantly different from all other groups
intersect(intersect(sig_T2D_LADA,sig_T2D_T1D),sig_T2D_Control)

```



character(0)

```
##Create boxplots / violin plots
#Normalize to get cells pr. gram feces
if (setequal(colnames(Taxonomy2), SF3$MicrobiomeID)==FALSE) {
  stop("Metadata and Taxonomy out of sync")
}

#Total sum scaling (Use relative abundances)
Taxonomy3<-sweep(Taxonomy2, 2, colSums(Taxonomy), FUN="/")
#Obtain values as cells pr. gram feces
Taxonomy3<-sweep(Taxonomy3, 2, SF3$CellNorm, FUN="*")
#Make to micro gram
Taxonomy3<-Taxonomy3/10^6

##Select organisms
SelOrgs<-unique(stat_sig$gene)
##Add SCFA producers see Venegas et al. 2019
SelOrgs<-unique(c(SelOrgs,
                  "Faecalibacterium", #prausnitzii
#                  "Clostridium", #leptum present as sensu stricto 1
#                  "Eubacterium", #rectale or hallii, here linosum
                  "Roseburia", #
                  "Anaerostipes",
                  "Bifidobacterium",
                  "Butyricicoccus",
                  "Akkermansia"))

tTaxSelect<-dplyr::select(as.data.frame(t(Taxonomy3)), one_of(c(SelOrgs)))
#Reducing the number because duplicates are removed
tTaxSelect<-add_rownames(tTaxSelect, "MicrobiomeID")
Plotting<-merge(SF3, tTaxSelect, by="MicrobiomeID")

##Might have issues with special characters, so this chunk might be needed
SelOrgs<-str_replace(SelOrgs, " ", "_")
SelOrgs<-str_replace(SelOrgs, "/", "_")
SelOrgs<-gsub("\\[|\\]", "", SelOrgs)
SelOrgs<-str_replace(SelOrgs, ":", "_")
colnames(Plotting) <- str_replace(colnames(Plotting), " ", "_")
colnames(Plotting) <- str_replace(colnames(Plotting), "/", "_")
colnames(Plotting) <- gsub("\\[|\\]", "", colnames(Plotting))
colnames(Plotting) <- str_replace(colnames(Plotting), ":", "_")

#Plot logs on y axis
Plotting2 <- bind_cols(Plotting[,1:16], log10(Plotting[,17:ncol(Plotting)]+1))
#See end of chunk for boxplots removed the violinplots, because of redundancy

##Create vulcano plots
#Cut offs Benjamini-Hochberg method to add to vulcano plot
#Don't know how to get exact so it is a cut-off corresponding to the BH method
BHAll<-aggregate(stat_sig[, 5:6], list(stat_sig$compare), max)
row.names(BHAll)<-BHAll$Group.1
```

```

BHLadaCon <- BHA11[which(rownames(BHA11)=="LADA vs Control"),
  which(colnames(BHA11)=="pvalue")]
BHLadaT1D <- BHA11[which(rownames(BHA11)=="LADA vs T1D"),
  which(colnames(BHA11)=="pvalue")]
BHLadaT2D <- BHA11[which(rownames(BHA11)=="LADA vs T2D"),
  which(colnames(BHA11)=="pvalue")]

#Vulcano plot
res_stat$minuslog10<--log(res_stat$pvalue)
#
#range(res_stat$minuslog10)
#range(res_stat$log2FoldChange)

names(res_stat)[names(res_stat) == 'gene'] <- 'Genus'
Feature2<-merge(res_stat, Feature, by="Genus")

#Create column org grouping for colouring
Feature2$Phyla <- ifelse(Feature2$Phylum=="Firmicutes", "Firmicutes",
  ifelse(Feature2$Phylum=="Proteobacteria", "Proteobacteria",
  ifelse(Feature2$Phylum=="Actinobacteria", "Actinobacteria",
  ifelse(Feature2$Phylum=="Bacteroidetes", "Bacteroidetes",
  ifelse(Feature2$Phylum=="Euryarchaeota", "Euryarchaeota",
    "Other")))))
#Order Phyla for plotting
Feature2$Phyla <- factor(Feature2$Phyla, levels=c("Proteobacteria", "Bacteroidetes",
  "Actinobacteria", "Firmicutes",
  "Euryarchaeota", "Other"))

##Summary significant orgs
#aggregate(Plotting[, 17:ncol(Plotting)], list(Plotting$Diagnosis), mean)
#aggregate(Plotting[, 17:ncol(Plotting)], list(Plotting$Diagnosis), sd)
zeroes <- function(x){
  sum(x == 0)
}
#aggregate(Plotting[, 17:ncol(Plotting)], list(Plotting$Diagnosis), zeroes)
zerocounts <- aggregate(Plotting[, 17:ncol(Plotting)], list(Plotting$Diagnosis), zeroes)
#bind_cols(zerocounts[,1], zerocounts[,2:ncol(zerocounts)]/c(70,30,70,70)*100)

#Add prevalence to plotting
prevalence<-data.frame((240-apply(Taxonomy, 1, zeroes))/240*100)
colnames(prevalence) <- c("Prevalence")
prevalence<-add_rownames(prevalence, var = "Genus")
Feature2 <- merge(Feature2, prevalence, by="Genus")

#Define boundaries
#Always run first without these lines to get indication of very low and high
#log2FoldChange and pvalue
Featurein <- filter(Feature2, -3<log2FoldChange & log2FoldChange<3 & 10>minuslog10)
Featureout <- filter(Feature2, -3>log2FoldChange | 3<log2FoldChange | 10<minuslog10)

```

```

Featureout$log2FoldChange[Featureout$log2FoldChange > 3] <- 3
Featureout$log2FoldChange[Featureout$log2FoldChange < (-3)] <- -3
Featureout$minuslog10[Featureout$minuslog10 > 10] <- 10

#Add text to volcano plots
p1<-ggplot() +
  geom_point(data=Featurein[which(Featurein$Phyla=="Proteobacteria" &
    Featurein$compare=="LADA vs T1D"), ],
    aes(x=log2FoldChange, y=minuslog10, group=Genus, color="#A6CEE3", shape=16,
    size=Featurein[which(Featurein$Phyla=="Proteobacteria" &
    Featurein$compare=="LADA vs T1D"), ]
    [,ncol(Featurein)]/40+0.5) +
  #did not add jitter to the first on purpose. Sizes are scaled from percent
  #to the range 0.5-3
  geom_point(data=Featureout[which(Featureout$Phyla=="Proteobacteria" &
    Featureout$compare=="LADA vs T1D"), ],
    aes(x=log2FoldChange, y=minuslog10, group=Genus), color="#A6CEE3", shape=18,
    size=Featureout[which(Featureout$Phyla=="Proteobacteria" &
    Featureout$compare=="LADA vs T1D"), ]
    [,ncol(Featureout)]/40+0.5) +
  geom_point(data=Featurein[which(Featurein$Phyla=="Bacteroidetes" &
    Featurein$compare=="LADA vs T1D"), ],
    aes(x=log2FoldChange, y=minuslog10, group=Genus), color="#FB9A99", shape=16,
    size=Featurein[which(Featurein$Phyla=="Bacteroidetes" &
    Featurein$compare=="LADA vs T1D"), ]
    [,ncol(Featurein)]/40+0.5) +
  geom_jitter(data=Featureout[which(Featureout$Phyla=="Bacteroidetes" &
    Featureout$compare=="LADA vs T1D"), ],
    aes(x=log2FoldChange, y=minuslog10, group=Genus), color="#FB9A99", shape=18,
    size=Featureout[which(Featureout$Phyla=="Bacteroidetes" &
    Featureout$compare=="LADA vs T1D"), ]
    [,ncol(Featureout)]/40+0.5, width = 0.1, height = 0.1) +
  geom_point(data=Featurein[which(Featurein$Phyla=="Actinobacteria" &
    Featurein$compare=="LADA vs T1D"), ],
    aes(x=log2FoldChange, y=minuslog10, group=Genus), color="#FDBF6F", shape=16,
    size=Featurein[which(Featurein$Phyla=="Actinobacteria" &
    Featurein$compare=="LADA vs T1D"), ]
    [,ncol(Featurein)]/40+0.5) +
  geom_jitter(data=Featureout[which(Featureout$Phyla=="Actinobacteria" &
    Featureout$compare=="LADA vs T1D"), ],
    aes(x=log2FoldChange, y=minuslog10, group=Genus), color="#FDBF6F", shape=18,
    size=Featureout[which(Featureout$Phyla=="Actinobacteria" &
    Featureout$compare=="LADA vs T1D"), ]
    [,ncol(Featureout)]/40+0.5, width = 0.1, height = 0.1) +
  geom_point(data=Featurein[which(Featurein$Phyla=="Firmicutes" &
    Featurein$compare=="LADA vs T1D"), ],
    aes(x=log2FoldChange, y=minuslog10, group=Genus),
    color="#B2DF8A", shape=16, alpha=0.75,
    size=Featurein[which(Featurein$Phyla=="Firmicutes" &
    Featurein$compare=="LADA vs T1D"), ]
    [,ncol(Featurein)]/40+0.5) +
  geom_jitter(data=Featureout[which(Featureout$Phyla=="Firmicutes" &

```

```

        Featureout$compare=="LADA vs T1D"), ],
aes(x=log2FoldChange, y=minuslog10, group=Genus),
color="#B2DF8A", shape=18,
size=Featureout[which(Featureout$Phyla=="Firmicutes" &
        Featureout$compare=="LADA vs T1D"), ]
[,ncol(Featureout)]/40+0.5, width = 0.1, height = 0.1) +
geom_point(data=Featurein[which(Featurein$Phyla=="Euryarchaeota" &
        Featurein$compare=="LADA vs T1D"), ],
aes(x=log2FoldChange, y=minuslog10, group=Genus), color="#CAB2D6", shape=16,
size=Featurein[which(Featurein$Phyla=="Euryarchaeota" &
        Featurein$compare=="LADA vs T1D"), ]
[,ncol(Featurein)]/40+0.5) +
geom_jitter(data=Featureout[which(Featureout$Phyla=="Euryarchaeota" &
        Featureout$compare=="LADA vs T1D"), ],
aes(x=log2FoldChange, y=minuslog10, group=Genus), color="#CAB2D6", shape=18,
size=Featureout[which(Featureout$Phyla=="Euryarchaeota" &
        Featureout$compare=="LADA vs T1D"), ]
[,ncol(Featureout)]/40+0.5, width = 0.1, height = 0.1) +
geom_point(data=Featurein[which(Featurein$Phyla=="Other" &
        Featurein$compare=="LADA vs T1D"), ],
aes(x=log2FoldChange, y=minuslog10, group=Genus), color="#B3B3B3", shape=16,
size=Featurein[which(Featurein$Phyla=="Other" &
        Featurein$compare=="LADA vs T1D"), ]
[,ncol(Featurein)]/40+0.5) +
geom_jitter(data=Featureout[which(Featureout$Phyla=="Other" &
        Featureout$compare=="LADA vs T1D"), ],
aes(x=log2FoldChange, y=minuslog10, group=Genus), color="#B3B3B3", shape=18,
size=Featureout[which(Featureout$Phyla=="Other" &
        Featureout$compare=="LADA vs T1D"), ]
[,ncol(Featureout)]/40+0.5, width = 0.1, height = 0.1) +
geom_text(data=Featurein[which(Featurein$padj<padj_threshold &
        Featurein$compare=="LADA vs T1D"), ],
aes(x=log2FoldChange, y=minuslog10, group=Genus, label=Genus),
nudge_y = 0.2, size=2.5) +
geom_text(data=Featureout[which(Featureout$padj<padj_threshold &
        Featureout$compare=="LADA vs T1D"), ],
aes(x=log2FoldChange, y=minuslog10, group=Genus, label=Genus),
nudge_x=0.6, nudge_y = -0.2, size=2.5) +
# geom_text(data=Featureout[which(Featureout$padj<padj_threshold &
#         Featureout$compare=="LADA vs T1D" &
#         Featureout$Genus=="Rikenellaceae_RC9_gut_group"), ],
#         aes(x=log2FoldChange, y=minuslog10, group=Genus, label=Genus),
#         nudge_x=1.22, nudge_y = 0) +
geom_hline(yintercept = -log(0.05), linetype="dashed") +
geom_hline(yintercept = -log(BHLadaT1D), linetype="dashed", alpha=0.1) +
geom_vline(xintercept = -1, linetype="dashed") +
geom_vline(xintercept = 1, linetype="dashed") +
theme_bw() +
ggtitle("T1D") +
xlab("Log2 fold change") +
ylab("-log10(P)") +
theme(panel.grid.major = element_blank(),
        panel.grid.minor = element_blank(),

```

```

axis.title=element_text(size=22),
legend.position="bottom",
legend.title=element_text(size=20),
legend.text=element_text(size=20),
axis.text.x = element_text(angle = 45, hjust = 1, size=12),
axis.text.y = element_text(angle = 45, hjust = 1, size=12),
plot.title = element_text(size = 22, hjust=0.5)
#ggplotly(p1)
p1

```

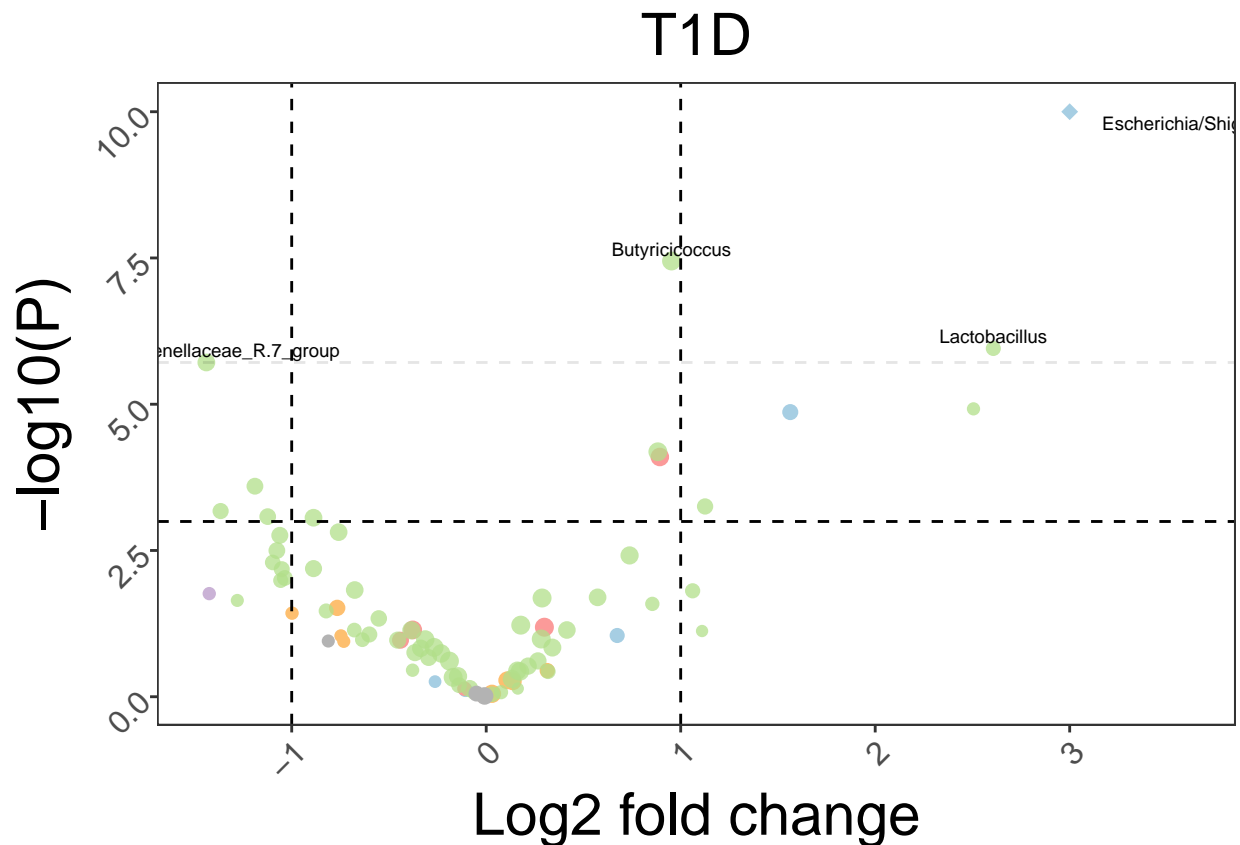

```

Fig2List[["vulcLadaT1D"]] <- p1

p2<-ggplot() +
  geom_point(data=Featurein[which(Featurein$Phyla=="Proteobacteria" &
    Featurein$compare=="LADA vs T2D"), ],
    aes(x=log2FoldChange, y=minuslog10, group=Genus), color="#A6CEE3", shape=16,
    size=Featurein[which(Featurein$Phyla=="Proteobacteria" &
    Featurein$compare=="LADA vs T2D"), ]
    [,ncol(Featurein)]/40+0.5) +
  #did not add jitter to the first on purpose. Sizes are scaled from percent
  #to the range 0.5-3
  geom_point(data=Featureout[which(Featureout$Phyla=="Proteobacteria" &
    Featureout$compare=="LADA vs T2D"), ],
    aes(x=log2FoldChange, y=minuslog10, group=Genus), color="#A6CEE3", shape=18,

```

```

size=Featureout[which(Featureout$Phyla=="Proteobacteria" &
  Featureout$compare=="LADA vs T2D"), ]
[,ncol(Featureout)]/40+0.5) +
geom_point(data=Featurein[which(Featurein$Phyla=="Bacteroidetes" &
  Featurein$compare=="LADA vs T2D"), ],
  aes(x=log2FoldChange, y=minuslog10, group=Genus, color="#FB9A99", shape=16,
  size=Featurein[which(Featurein$Phyla=="Bacteroidetes" &
    Featurein$compare=="LADA vs T2D"), ]
    [,ncol(Featurein)]/40+0.5) +
geom_jitter(data=Featureout[which(Featureout$Phyla=="Bacteroidetes" &
  Featureout$compare=="LADA vs T2D"), ],
  aes(x=log2FoldChange, y=minuslog10, group=Genus, color="#FB9A99", shape=18,
  size=Featureout[which(Featureout$Phyla=="Bacteroidetes" &
    Featureout$compare=="LADA vs T2D"), ]
    [,ncol(Featureout)]/40+0.5,
  width = 0.1, height = 0.1) +
geom_point(data=Featurein[which(Featurein$Phyla=="Actinobacteria" &
  Featurein$compare=="LADA vs T2D"), ],
  aes(x=log2FoldChange, y=minuslog10, group=Genus, color="#FDBF6F", shape=16,
  size=Featurein[which(Featurein$Phyla=="Actinobacteria" &
    Featurein$compare=="LADA vs T2D"), ]
    [,ncol(Featurein)]/40+0.5) +
geom_jitter(data=Featureout[which(Featureout$Phyla=="Actinobacteria" &
  Featureout$compare=="LADA vs T2D"), ],
  aes(x=log2FoldChange, y=minuslog10, group=Genus), color="#FDBF6F", shape=18,
  size=Featureout[which(Featureout$Phyla=="Actinobacteria" &
    Featureout$compare=="LADA vs T2D"), ]
    [,ncol(Featureout)]/40+0.5, width = 0.1, height = 0.1) +
geom_point(data=Featurein[which(Featurein$Phyla=="Firmicutes" &
  Featurein$compare=="LADA vs T2D"), ],
  aes(x=log2FoldChange, y=minuslog10, group=Genus),
  color="#B2DF8A", shape=16, alpha=0.75,
  size=Featurein[which(Featurein$Phyla=="Firmicutes" &
    Featurein$compare=="LADA vs T2D"), ]
    [,ncol(Featurein)]/40+0.5) +
geom_jitter(data=Featureout[which(Featureout$Phyla=="Firmicutes" &
  Featureout$compare=="LADA vs T2D"), ],
  aes(x=log2FoldChange, y=minuslog10, group=Genus),
  color="#B2DF8A", shape=18,
  size=Featureout[which(Featureout$Phyla=="Firmicutes" &
    Featureout$compare=="LADA vs T2D"), ]
    [,ncol(Featureout)]/40+0.5, width = 0.1, height = 0.1) +
geom_point(data=Featurein[which(Featurein$Phyla=="Euryarchaeota" &
  Featurein$compare=="LADA vs T2D"), ],
  aes(x=log2FoldChange, y=minuslog10, group=Genus), color="#CAB2D6", shape=16,
  size=Featurein[which(Featurein$Phyla=="Euryarchaeota" &
    Featurein$compare=="LADA vs T2D"), ]
    [,ncol(Featurein)]/40+0.5) +
geom_jitter(data=Featureout[which(Featureout$Phyla=="Euryarchaeota" &
  Featureout$compare=="LADA vs T2D"), ],
  aes(x=log2FoldChange, y=minuslog10, group=Genus), color="#CAB2D6", shape=18,
  size=Featureout[which(Featureout$Phyla=="Euryarchaeota" &
    Featureout$compare=="LADA vs T2D"), ]

```

```

    [,ncol(Featureout)]/40+0.5, width = 0.1, height = 0.1) +
geom_point(data=Featurein[which(Featurein$Phyla=="Other" &
    Featurein$compare=="LADA vs T2D"), ],
    aes(x=log2FoldChange, y=minuslog10, group=Genus), color="#B3B3B3", shape=16,
    size=Featurein[which(Featurein$Phyla=="Other" &
    Featurein$compare=="LADA vs T2D"), ]
    [,ncol(Featurein)]/40+0.5) +
geom_jitter(data=Featureout[which(Featureout$Phyla=="Other" &
    Featureout$compare=="LADA vs T2D"), ],
    aes(x=log2FoldChange, y=minuslog10, group=Genus), color="#B3B3B3", shape=18,
    size=Featureout[which(Featureout$Phyla=="Other" &
    Featureout$compare=="LADA vs T2D"), ]
    [,ncol(Featureout)]/40+0.5, width = 0.1, height = 0.1) +
geom_text(data=Featurein[which(Featurein$padj<padj_threshold &
    Featurein$compare=="LADA vs T2D"), ],
    aes(x=log2FoldChange, y=minuslog10, group=Genus, label=Genus),
    nudge_y = 0.2, size=2.5) +
geom_text(data=Featureout[which(Featureout$padj<padj_threshold &
    Featureout$compare=="LADA vs T2D"), ],
    aes(x=log2FoldChange, y=minuslog10, group=Genus, label=Genus),
    nudge_x=0.6, nudge_y = -0.2, size=2.5) +
# geom_text(data=Featureout[which(Featureout$padj<padj_threshold &
#     Featureout$compare=="LADA vs T1D" &
#     Featureout$Genus=="Rikenellaceae_RC9_gut_group"), ],
#     aes(x=log2FoldChange, y=minuslog10, group=Genus, label=Genus),
#     nudge_x=1.22, nudge_y = 0) +
geom_hline(yintercept = -log(0.05), linetype="dashed") +
geom_hline(yintercept = -log(BHLadaT2D), linetype="dashed", alpha=0.1) +
geom_vline(xintercept = -1, linetype="dashed") +
geom_vline(xintercept = 1, linetype="dashed") +
theme_bw() +
ggtitle("T2D") +
xlab("Log2 fold change") +
ylab("-log10(P)") +
theme(panel.grid.major = element_blank(),
    panel.grid.minor = element_blank(),
    axis.title=element_text(size=22),
    legend.position="bottom",
    legend.title=element_text(size=20),
    legend.text=element_text(size=20),
    axis.text.x = element_text(angle = 45, hjust = 1, size=12),
    axis.text.y = element_text(angle = 45, hjust = 1, size=12),
    plot.title = element_text(size = 22, hjust=0.5))
#ggplotly(p2)
p2

```



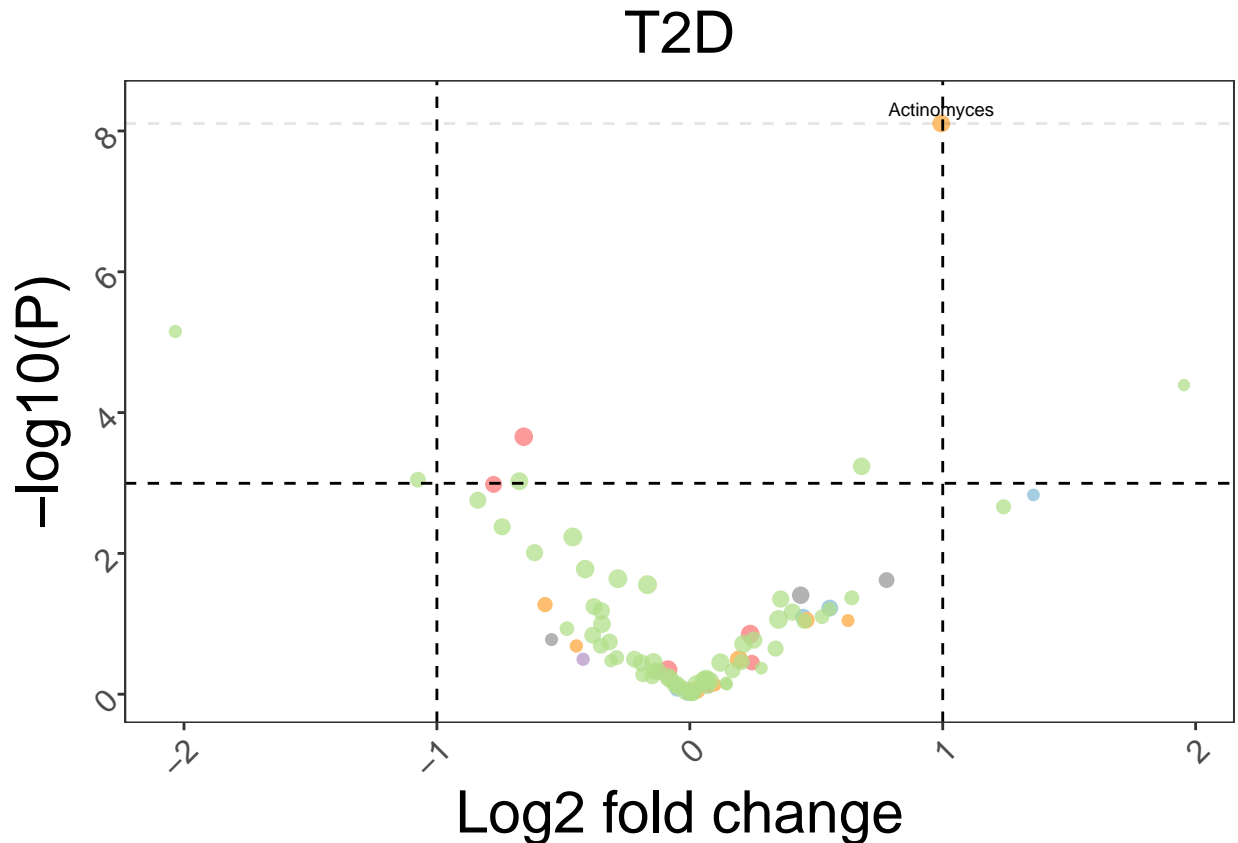

```
Fig2List[["vulcLadaT2D"]] <- p2
```

```
p3<-ggplot() +
  geom_point(data=Featurein[which(Featurein$Phyla=="Proteobacteria" &
                                Featurein$compare=="LADA vs Control"), ],
            aes(x=log2FoldChange, y=minuslog10, group=Genus), color="#A6CEE3", shape=16,
            size=Featurein[which(Featurein$Phyla=="Proteobacteria" &
                                Featurein$compare=="LADA vs Control"), ]
            [,ncol(Featurein)]/40+0.5) +
  #did not add jitter to the first on purpose. Sizes are scaled from percent to the range 0.5-3
  geom_point(data=Featureout[which(Featureout$Phyla=="Proteobacteria" &
                                   Featureout$compare=="LADA vs Control"), ],
            aes(x=log2FoldChange, y=minuslog10, group=Genus), color="#A6CEE3", shape=18,
            size=Featureout[which(Featureout$Phyla=="Proteobacteria" &
                                   Featureout$compare=="LADA vs Control"), ]
            [,ncol(Featureout)]/40+0.5) +
  geom_point(data=Featurein[which(Featurein$Phyla=="Bacteroidetes" &
                                   Featurein$compare=="LADA vs Control"), ],
            aes(x=log2FoldChange, y=minuslog10, group=Genus), color="#FB9A99", shape=16,
            size=Featurein[which(Featurein$Phyla=="Bacteroidetes" &
                                   Featurein$compare=="LADA vs Control"), ]
            [,ncol(Featurein)]/40+0.5) +
  geom_jitter(data=Featureout[which(Featureout$Phyla=="Bacteroidetes" &
                                    Featureout$compare=="LADA vs Control"), ],
            aes(x=log2FoldChange, y=minuslog10, group=Genus), color="#FB9A99", shape=18,
```



```

size=Featureout[which(Featureout$Phyla=="Bacteroidetes" &
  Featureout$compare=="LADA vs Control"), ]
[,ncol(Featureout)]/40+0.5, width = 0.1, height = 0.1) +
geom_point(data=Featurein[which(Featurein$Phyla=="Actinobacteria" &
  Featurein$compare=="LADA vs Control"), ],
  aes(x=log2FoldChange, y=minuslog10, group=Genus), color="#FDBF6F", shape=16,
  size=Featurein[which(Featurein$Phyla=="Actinobacteria" &
  Featurein$compare=="LADA vs Control"), ]
[,ncol(Featurein)]/40+0.5) +
geom_jitter(data=Featureout[which(Featureout$Phyla=="Actinobacteria" &
  Featureout$compare=="LADA vs Control"), ],
  aes(x=log2FoldChange, y=minuslog10, group=Genus), color="#FDBF6F", shape=18,
  size=Featureout[which(Featureout$Phyla=="Actinobacteria" &
  Featureout$compare=="LADA vs Control"), ]
[,ncol(Featureout)]/40+0.5, width = 0.1, height = 0.1) +
geom_point(data=Featurein[which(Featurein$Phyla=="Firmicutes" &
  Featurein$compare=="LADA vs Control"), ],
  aes(x=log2FoldChange, y=minuslog10, group=Genus),
  color="#B2DF8A", shape=16, alpha=0.75,
  size=Featurein[which(Featurein$Phyla=="Firmicutes" &
  Featurein$compare=="LADA vs Control"), ]
[,ncol(Featurein)]/40+0.5) +
geom_jitter(data=Featureout[which(Featureout$Phyla=="Firmicutes" &
  Featureout$compare=="LADA vs Control"), ],
  aes(x=log2FoldChange, y=minuslog10, group=Genus),
  color="#B2DF8A", shape=18,
  size=Featureout[which(Featureout$Phyla=="Firmicutes" &
  Featureout$compare=="LADA vs Control"), ]
[,ncol(Featureout)]/40+0.5, width = 0.1, height = 0.1) +
geom_point(data=Featurein[which(Featurein$Phyla=="Euryarchaeota" &
  Featurein$compare=="LADA vs Control"), ],
  aes(x=log2FoldChange, y=minuslog10, group=Genus), color="#CAB2D6", shape=16,
  size=Featurein[which(Featurein$Phyla=="Euryarchaeota" &
  Featurein$compare=="LADA vs Control"), ]
[,ncol(Featurein)]/40+0.5) +
geom_jitter(data=Featureout[which(Featureout$Phyla=="Euryarchaeota" &
  Featureout$compare=="LADA vs Control"), ],
  aes(x=log2FoldChange, y=minuslog10, group=Genus), color="#CAB2D6", shape=18,
  size=Featureout[which(Featureout$Phyla=="Euryarchaeota" &
  Featureout$compare=="LADA vs Control"), ]
[,ncol(Featureout)]/40+0.5, width = 0.1, height = 0.1) +
geom_point(data=Featurein[which(Featurein$Phyla=="Other" &
  Featurein$compare=="LADA vs Control"), ],
  aes(x=log2FoldChange, y=minuslog10, group=Genus), color="#B3B3B3", shape=16,
  size=Featurein[which(Featurein$Phyla=="Other" &
  Featurein$compare=="LADA vs Control"), ]
[,ncol(Featurein)]/40+0.5) +
geom_jitter(data=Featureout[which(Featureout$Phyla=="Other" &
  Featureout$compare=="LADA vs Control"), ],
  aes(x=log2FoldChange, y=minuslog10, group=Genus), color="#B3B3B3", shape=18,
  size=Featureout[which(Featureout$Phyla=="Other" &
  Featureout$compare=="LADA vs Control"), ]
[,ncol(Featureout)]/40+0.5, width = 0.1, height = 0.1) +

```

```

geom_text(data=Featurein[which(Featurein$padj<padj_threshold &
                             Featurein$compare=="LADA vs Control"), ],
          aes(x=log2FoldChange, y=minuslog10, group=Genus, label=Genus),
          nudge_y = 0.2, size=2.5) +
geom_text(data=Featureout[which(Featureout$padj<padj_threshold &
                               Featureout$compare=="LADA vs Control"), ],
          aes(x=log2FoldChange, y=minuslog10, group=Genus, label=Genus),
          nudge_x=0.6, nudge_y = -0.2, size=2.5) +
# geom_text(data=Featureout[which(Featureout$padj<padj_threshold &
#                               Featureout$compare=="LADA vs T1D" &
#                               Featureout$Genus=="Rikenellaceae_RC9_gut_group"), ],
#          aes(x=log2FoldChange, y=minuslog10, group=Genus, label=Genus),
#          nudge_x=1.22, nudge_y = 0) +
geom_hline(yintercept = -log(0.05), linetype="dashed") +
geom_hline(yintercept = -log(BHLadaCon), linetype="dashed", alpha=0.1) +
geom_vline(xintercept = -1, linetype="dashed") +
geom_vline(xintercept = 1, linetype="dashed") +
theme_bw() +
ggtitle("Controls") +
xlab("Log2 fold change") +
ylab("-log10(P)") +
theme(panel.grid.major = element_blank(),
      panel.grid.minor = element_blank(),
      axis.title=element_text(size=22),
      legend.position="bottom",
      legend.title=element_text(size=20),
      legend.text=element_text(size=20),
      axis.text.x = element_text(angle = 45, hjust = 1, size=12),
      axis.text.y = element_text(angle = 45, hjust = 1, size=12),
      plot.title = element_text(size = 22, hjust=0.5))
#ggplotly(p3)
p3

```

## Controls

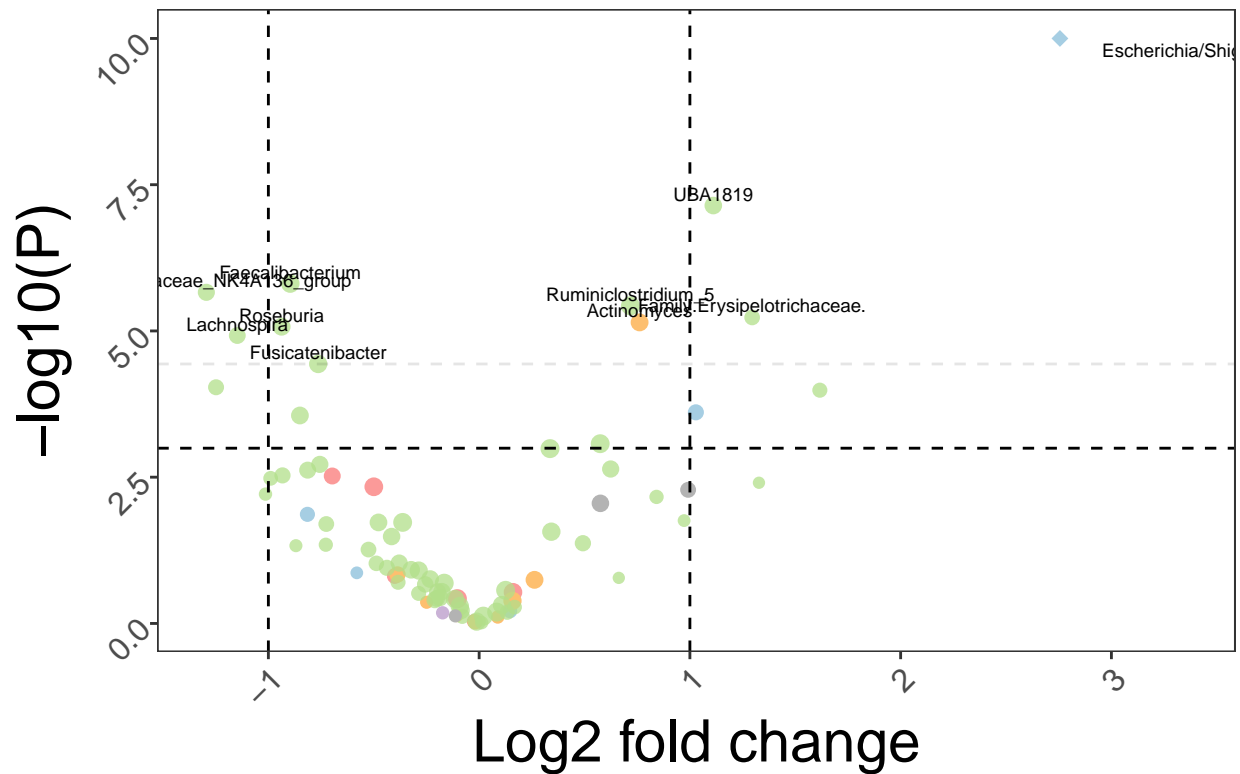

```
Fig2List[["vulcLadaControl"]] <- p3
```

```
lay <- rbind(c(1,2,3))
pdf(paste("MicroLADA_Vulcano.pdf", sep=""), width=15, height=5)
grid.arrange(p1,p2,p3,layout_matrix = lay)
dev.off()
```

pdf 2

```
##Boxplot with stats intertwined
#Stats have to be in the end of the chunk don't ask me why
#Have to use the same naming in res_stat to output tables
res_stat$Genus<-str_replace_all(res_stat$Genus, " ","_")
res_stat$Genus<-str_replace_all(res_stat$Genus, "/", "_")
res_stat$Genus<-gsub("\\[|\\]", "", res_stat$Genus)
res_stat$Genus<-str_replace_all(res_stat$Genus, ":", "_")
res_stat$Genus<-str_replace_all(res_stat$Genus, "-", "_")

#Order Diagnosis
Plotting2$Diagnosis<-ordered(Plotting2$Diagnosis,
                             levels=c("Control", "T1D", "LADA", "T2D"))

for (i in SelOrgs) {
  Boxplot <-
  ggplot(Plotting2, aes_string(x="Diagnosis", y=i, group="Diagnosis")) +
```

```

geom_boxplot() +
#   geom_boxplot(aes(fill=Diagnosis, trim=FALSE)) +
#   geom_jitter() +
geom_jitter(aes(color=Diagnosis), size=2) +
stat_summary(fun.data="mean_sdl",
             mult=1, #mean plus minus a constant (mult=1) times the st.dev
             geom="pointrange",
             width=0.2 ) +
#stat_summary(fun.y = mean, geom = "point") +
#facet_grid(. ~ Metformin, scales="fixed") + #Scales can also be "free"
ggtitle(i) +
#xlab("Diagnosis") +
ylab("Cells pr. g feces") +
scale_fill_manual(values=c(Control = "#666666", T1D = "#1F78B4",
                           T2D = "#33A02C", LADA = "#E31A1C")) +
scale_color_manual(values=c(Control = "#666666", T1D = "#1F78B4",
                             T2D = "#33A02C", LADA = "#E31A1C")) +
theme_bw() +
theme(legend.position="none",
      title =element_text(size=18, face='bold'),
      panel.grid.major = element_blank(),
      panel.grid.minor = element_blank(),
      axis.title=element_text(size=16),
      axis.title.x = element_blank(),
      axis.text.x = element_text(angle = 45, hjust = 1, size=14),
      axis.text.y = element_text(angle = 45, hjust = 1, size=12))
Fig2List[[i]] <- Boxplot
#print(kable(stat_sig[which(stat_sig$gene==i), c(5,6,7,10)]))
cat("\n")
tabling<-res_stat[which(res_stat$Genus==i), c(5,6,7,10)]
print(kable(tabling))
#print(tabling)
cat("\n")
print(Boxplot)
}

```

|     | pvalue    | padj      | Genus                | compare         |
|-----|-----------|-----------|----------------------|-----------------|
| 407 | 0.0000000 | 0.0000032 | Escherichia_Shigella | LADA vs T1D     |
| 243 | 0.0000002 | 0.0000155 | Escherichia_Shigella | LADA vs Control |
| 325 | 0.0000035 | 0.0001448 | Escherichia_Shigella | T1D vs T2D      |
| 161 | 0.0000384 | 0.0031474 | Escherichia_Shigella | Control vs T2D  |
| 79  | 0.1577557 | 0.6671050 | Escherichia_Shigella | Control vs T1D  |
| 489 | 0.2938808 | 0.8784397 | Escherichia_Shigella | LADA vs T2D     |

# Escherichia\_Shigella

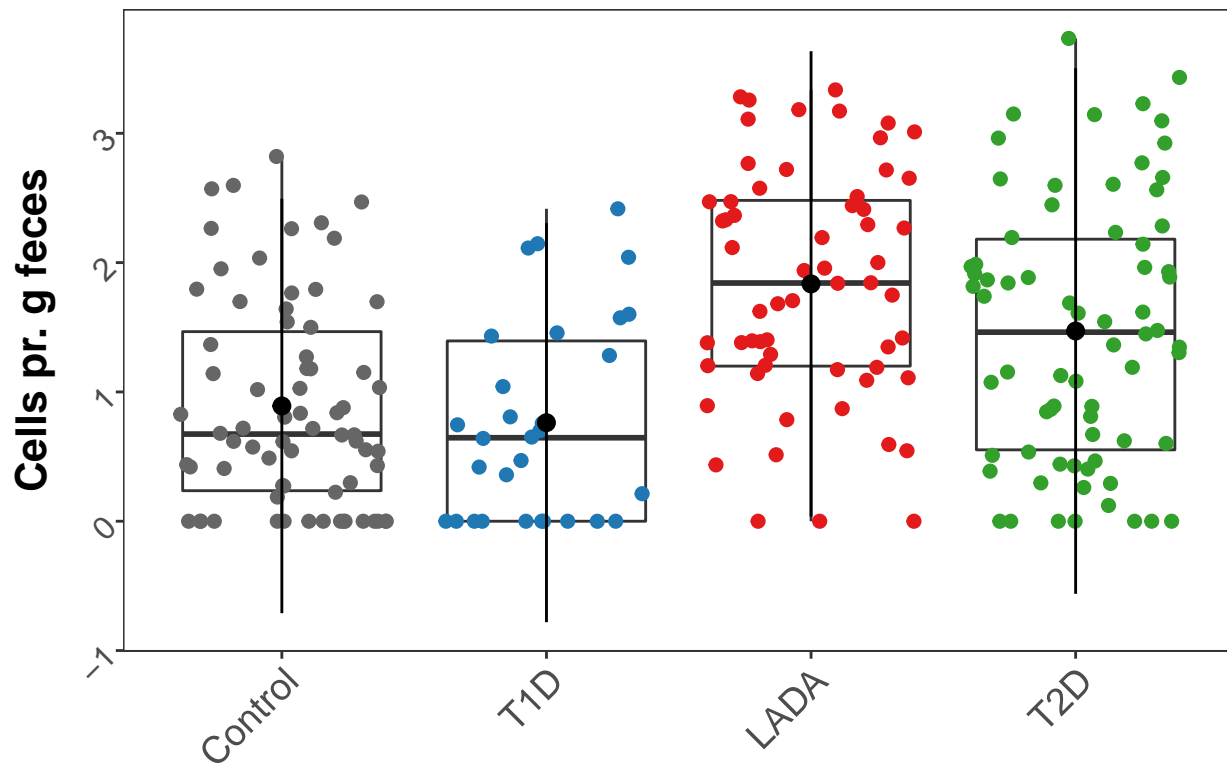

|     | pvalue    | padj      | Genus       | compare         |
|-----|-----------|-----------|-------------|-----------------|
| 319 | 0.0000014 | 0.0001112 | Veillonella | T1D vs T2D      |
| 401 | 0.0072926 | 0.1053626 | Veillonella | LADA vs T1D     |
| 73  | 0.0056782 | 0.1164036 | Veillonella | Control vs T1D  |
| 155 | 0.0062284 | 0.1282578 | Veillonella | Control vs T2D  |
| 483 | 0.0057891 | 0.2373534 | Veillonella | LADA vs T2D     |
| 237 | 0.9868731 | 0.9868731 | Veillonella | LADA vs Control |

# Veillonella

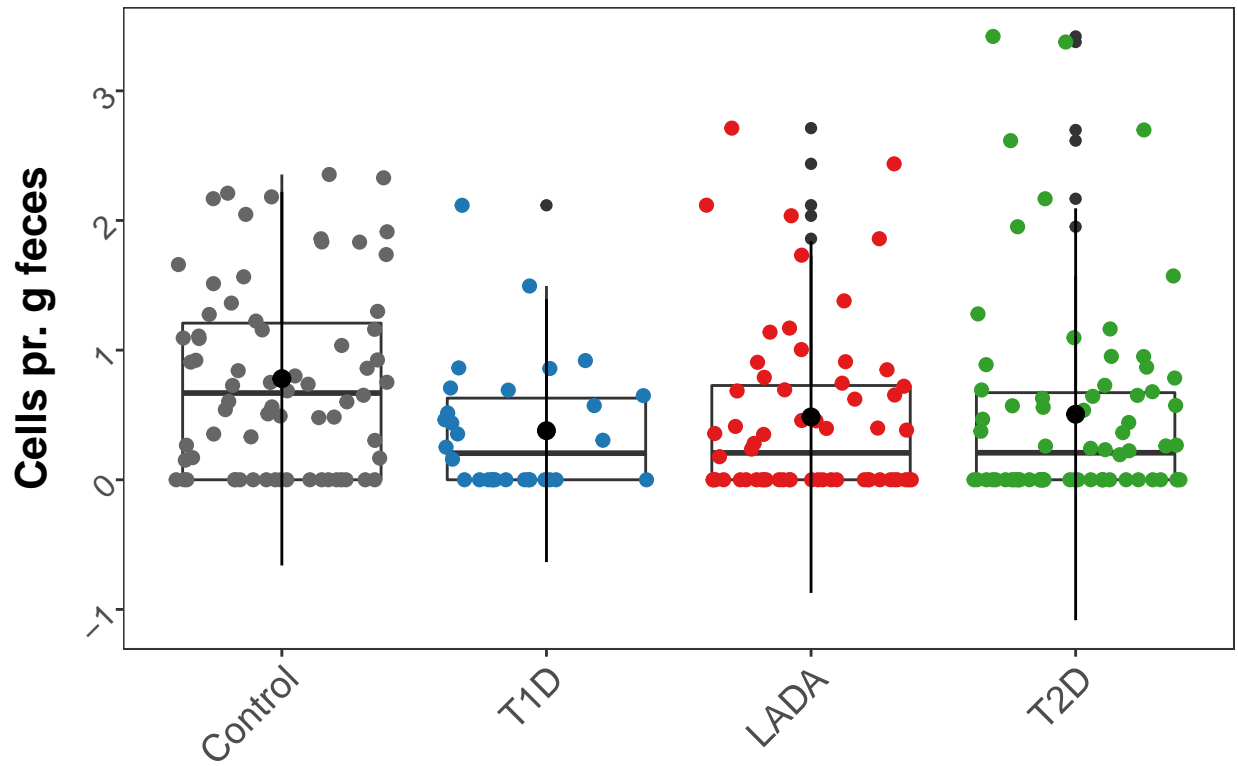

|     | pvalue    | padj      | Genus          | compare         |
|-----|-----------|-----------|----------------|-----------------|
| 289 | 0.0000090 | 0.0002473 | Butyricicoccus | T1D vs T2D      |
| 371 | 0.0005825 | 0.0238817 | Butyricicoccus | LADA vs T1D     |
| 43  | 0.0019827 | 0.0905858 | Butyricicoccus | Control vs T1D  |
| 125 | 0.0649629 | 0.4097658 | Butyricicoccus | Control vs T2D  |
| 207 | 0.5675075 | 0.8442104 | Butyricicoccus | LADA vs Control |
| 453 | 0.1938785 | 0.8784397 | Butyricicoccus | LADA vs T2D     |

# Butyrivicoccus

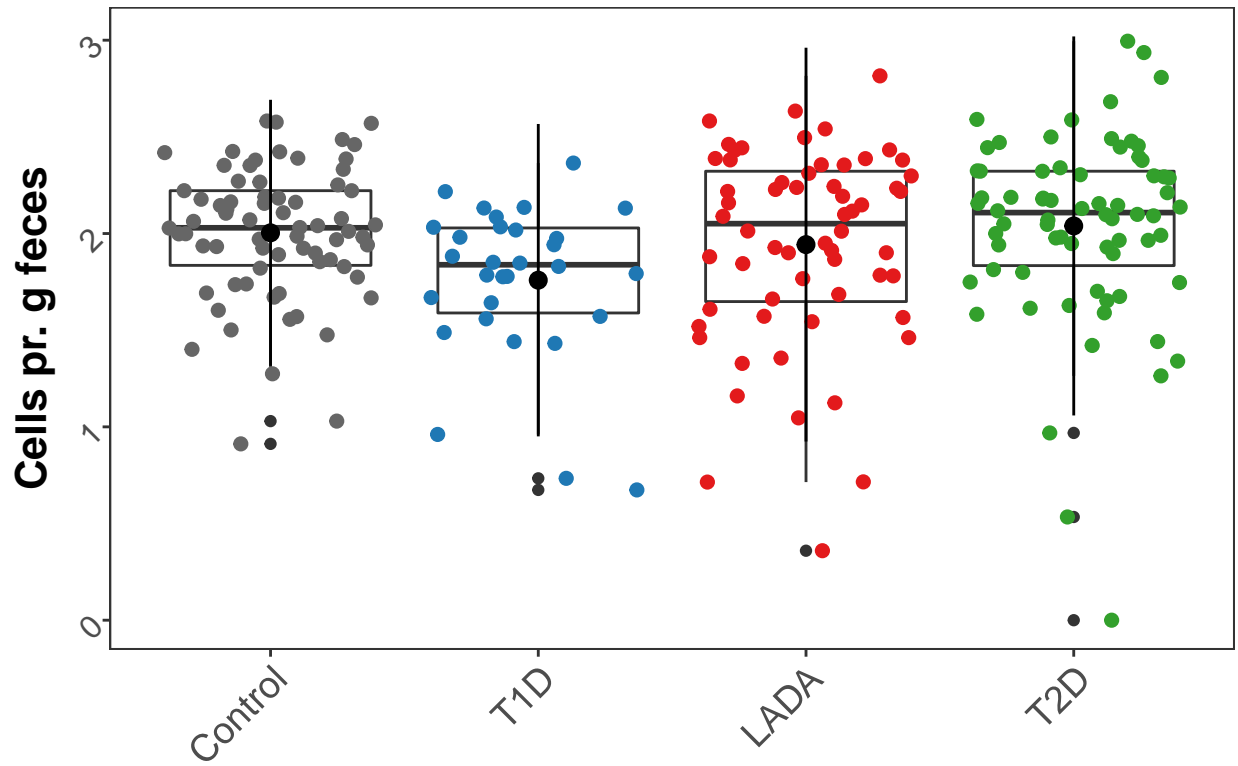

|     | pvalue    | padj      | Genus           | compare         |
|-----|-----------|-----------|-----------------|-----------------|
| 261 | 0.0000360 | 0.0007384 | Parabacteroides | T1D vs T2D      |
| 97  | 0.0062565 | 0.1282578 | Parabacteroides | Control vs T2D  |
| 343 | 0.0166021 | 0.1701718 | Parabacteroides | LADA vs T1D     |
| 15  | 0.0418953 | 0.4294270 | Parabacteroides | Control vs T1D  |
| 425 | 0.0257991 | 0.5204546 | Parabacteroides | LADA vs T2D     |
| 179 | 0.5868292 | 0.8442104 | Parabacteroides | LADA vs Control |

# Parabacteroides

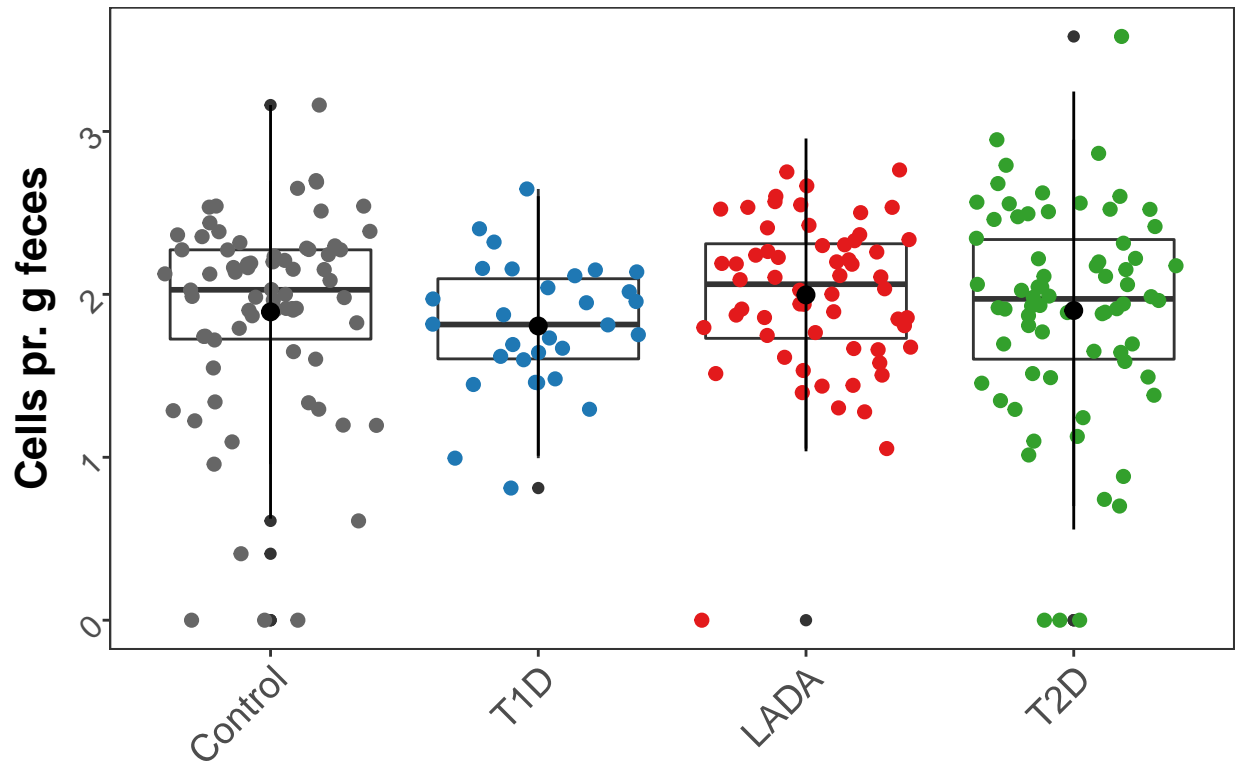

|     | pvalue    | padj      | Genus           | compare         |
|-----|-----------|-----------|-----------------|-----------------|
| 277 | 0.0002349 | 0.0038521 | Lachnospirillum | T1D vs T2D      |
| 113 | 0.0003741 | 0.0153388 | Lachnospirillum | Control vs T2D  |
| 359 | 0.0151897 | 0.1701718 | Lachnospirillum | LADA vs T1D     |
| 195 | 0.0462996 | 0.2531043 | Lachnospirillum | LADA vs Control |
| 441 | 0.1071864 | 0.6760990 | Lachnospirillum | LADA vs T2D     |
| 31  | 0.3802075 | 0.8204478 | Lachnospirillum | Control vs T1D  |



# Lachnoclostridium

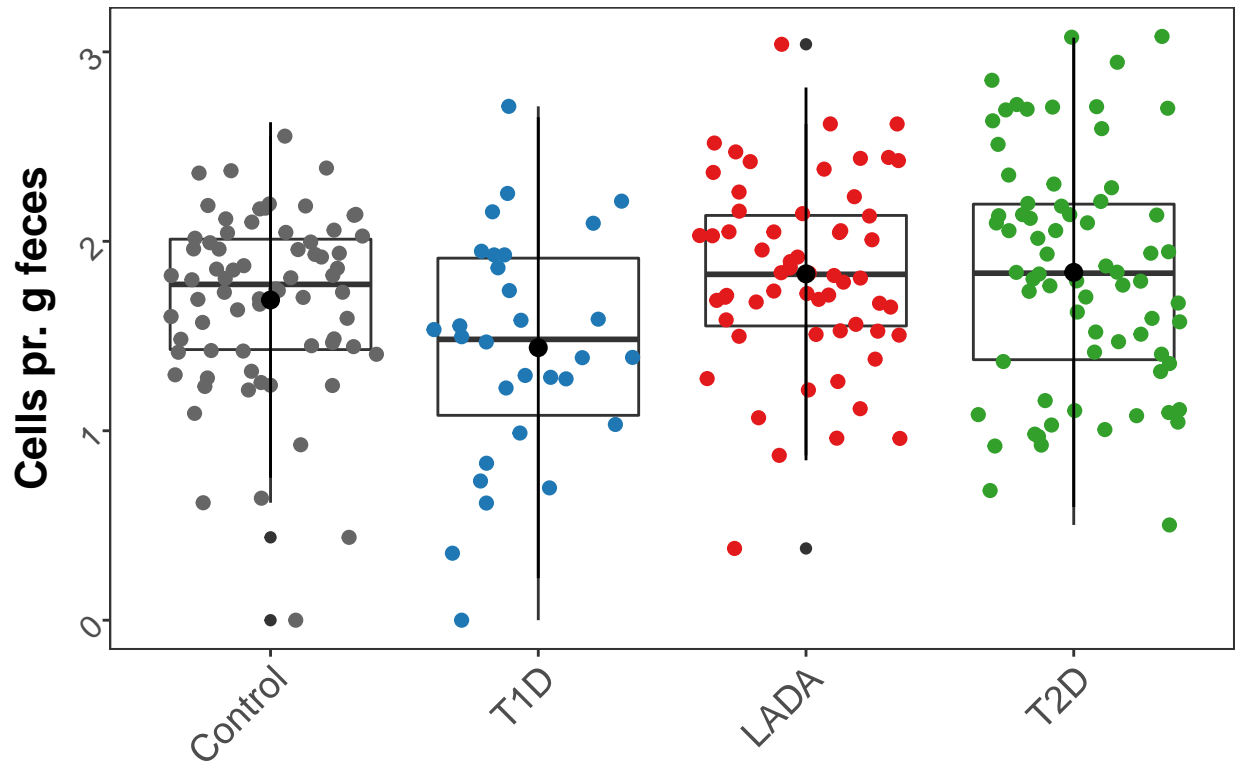

|     | pvalue    | padj      | Genus       | compare         |
|-----|-----------|-----------|-------------|-----------------|
| 412 | 0.0003019 | 0.0247557 | Actinomyces | LADA vs T2D     |
| 166 | 0.0058207 | 0.0641923 | Actinomyces | LADA vs Control |
| 248 | 0.0113021 | 0.1356968 | Actinomyces | T1D vs T2D      |
| 2   | 0.0516306 | 0.4704122 | Actinomyces | Control vs T1D  |
| 84  | 0.4052829 | 0.7912666 | Actinomyces | Control vs T2D  |
| 330 | 0.7551490 | 0.9048022 | Actinomyces | LADA vs T1D     |

# Actinomyces

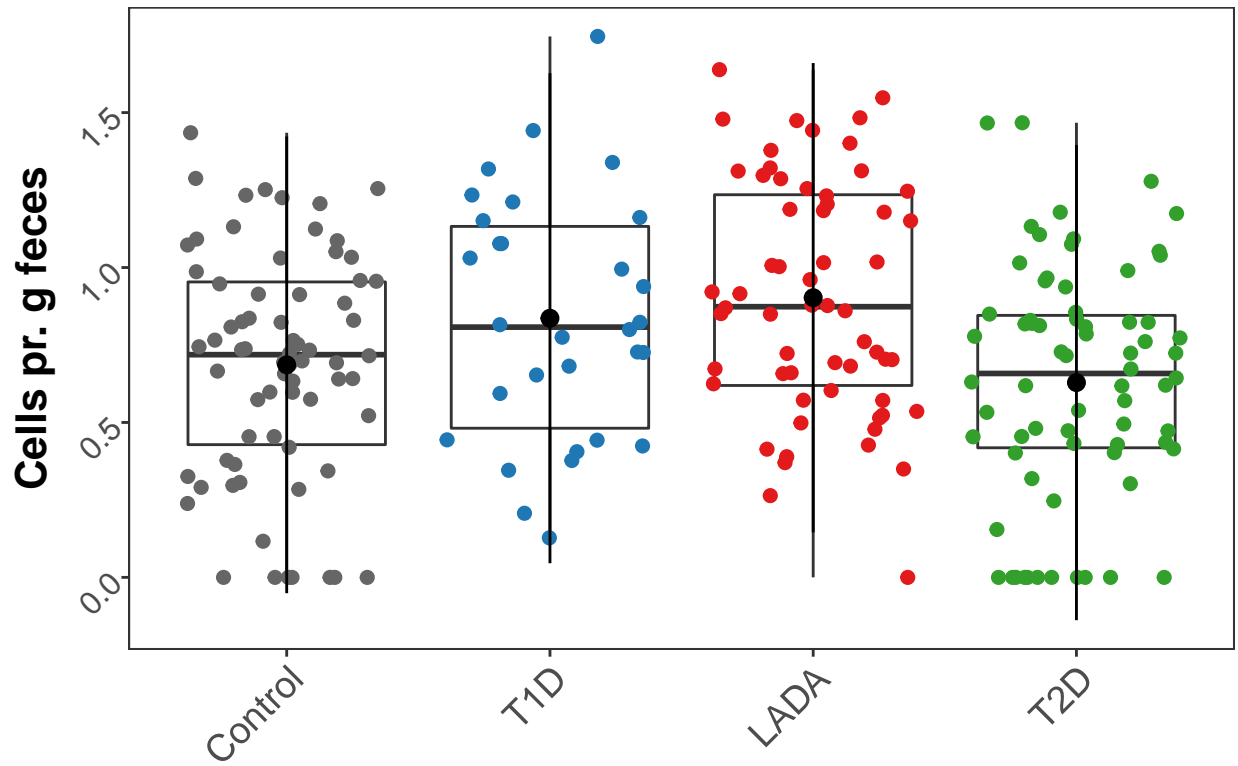

|     | pvalue    | padj      | Genus   | compare         |
|-----|-----------|-----------|---------|-----------------|
| 227 | 0.0007900 | 0.0323904 | UBA1819 | LADA vs Control |
| 473 | 0.0393120 | 0.5204546 | UBA1819 | LADA vs T2D     |
| 145 | 0.1972930 | 0.6220744 | UBA1819 | Control vs T2D  |
| 391 | 0.3196032 | 0.6366683 | UBA1819 | LADA vs T1D     |
| 63  | 0.0839280 | 0.6421130 | UBA1819 | Control vs T1D  |
| 309 | 0.5286115 | 0.7740383 | UBA1819 | T1D vs T2D      |

# UBA1819

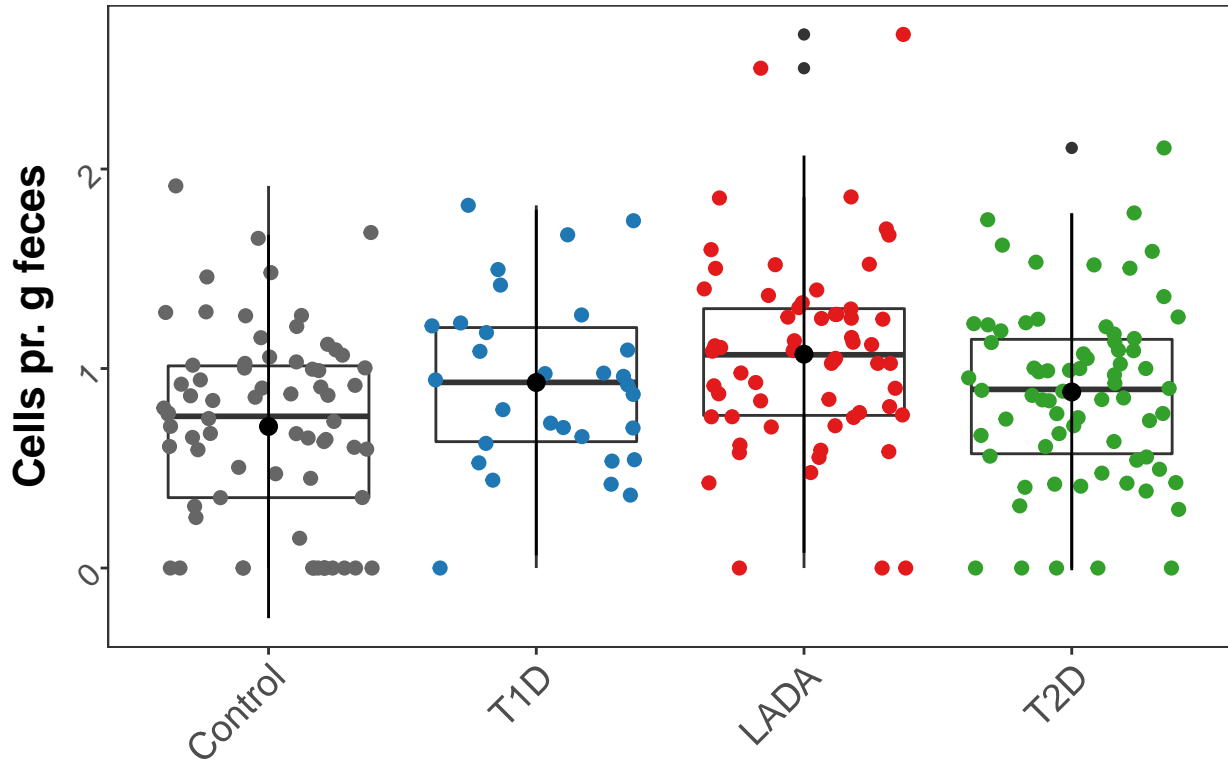

|     | pvalue    | padj      | Genus            | compare         |
|-----|-----------|-----------|------------------|-----------------|
| 208 | 0.0029970 | 0.0641923 | Faecalibacterium | LADA vs Control |
| 44  | 0.0036185 | 0.0989047 | Faecalibacterium | Control vs T1D  |
| 290 | 0.1253968 | 0.3685716 | Faecalibacterium | T1D vs T2D      |
| 126 | 0.1141709 | 0.4749576 | Faecalibacterium | Control vs T2D  |
| 372 | 0.6490728 | 0.8323675 | Faecalibacterium | LADA vs T1D     |
| 454 | 0.1690955 | 0.8784397 | Faecalibacterium | LADA vs T2D     |

# Faecalibacterium

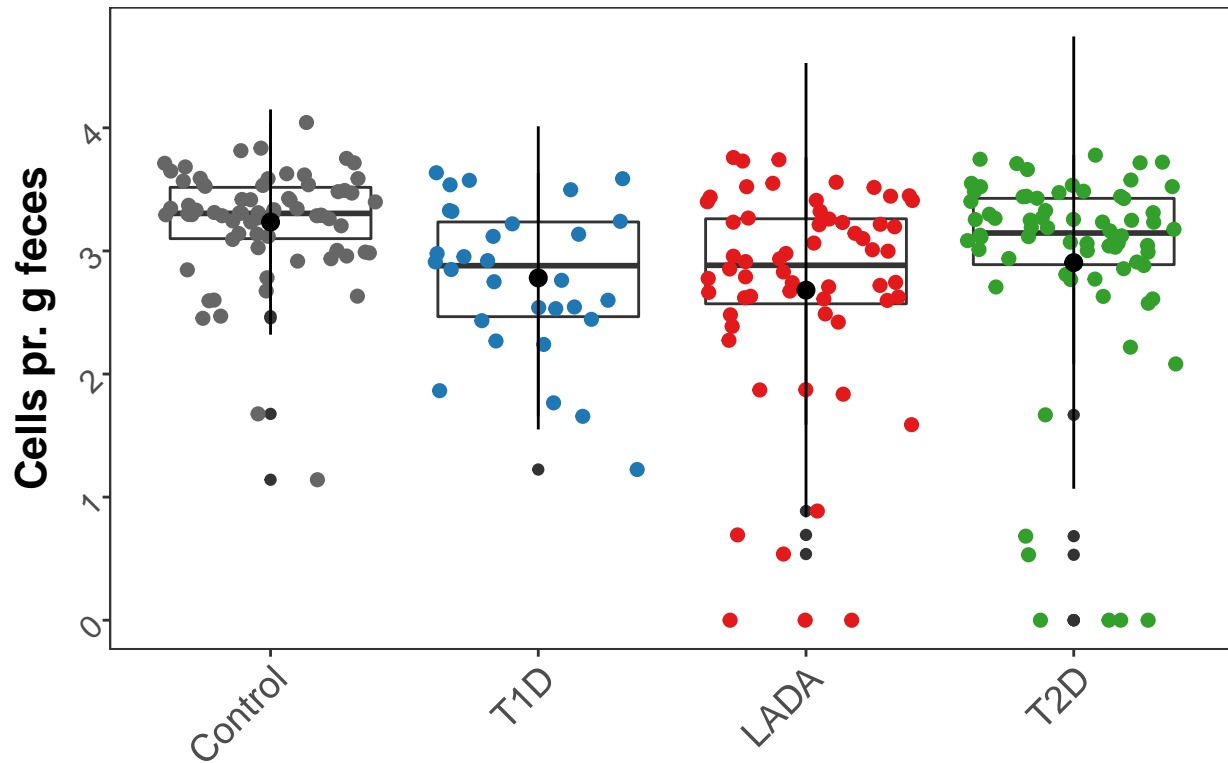

|     | pvalue    | padj      | Genus                         | compare         |
|-----|-----------|-----------|-------------------------------|-----------------|
| 199 | 0.0034815 | 0.0641923 | Lachnospiraceae_NK4A136_group | LADA vs Control |
| 363 | 0.1118797 | 0.4631237 | Lachnospiraceae_NK4A136_group | LADA vs T1D     |
| 117 | 0.2177415 | 0.6220744 | Lachnospiraceae_NK4A136_group | Control vs T2D  |
| 445 | 0.0927767 | 0.6339739 | Lachnospiraceae_NK4A136_group | LADA vs T2D     |
| 35  | 0.4509587 | 0.8217470 | Lachnospiraceae_NK4A136_group | Control vs T1D  |
| 281 | 0.7953727 | 0.9280418 | Lachnospiraceae_NK4A136_group | T1D vs T2D      |

# Lachnospiraceae\_NK4A136\_group

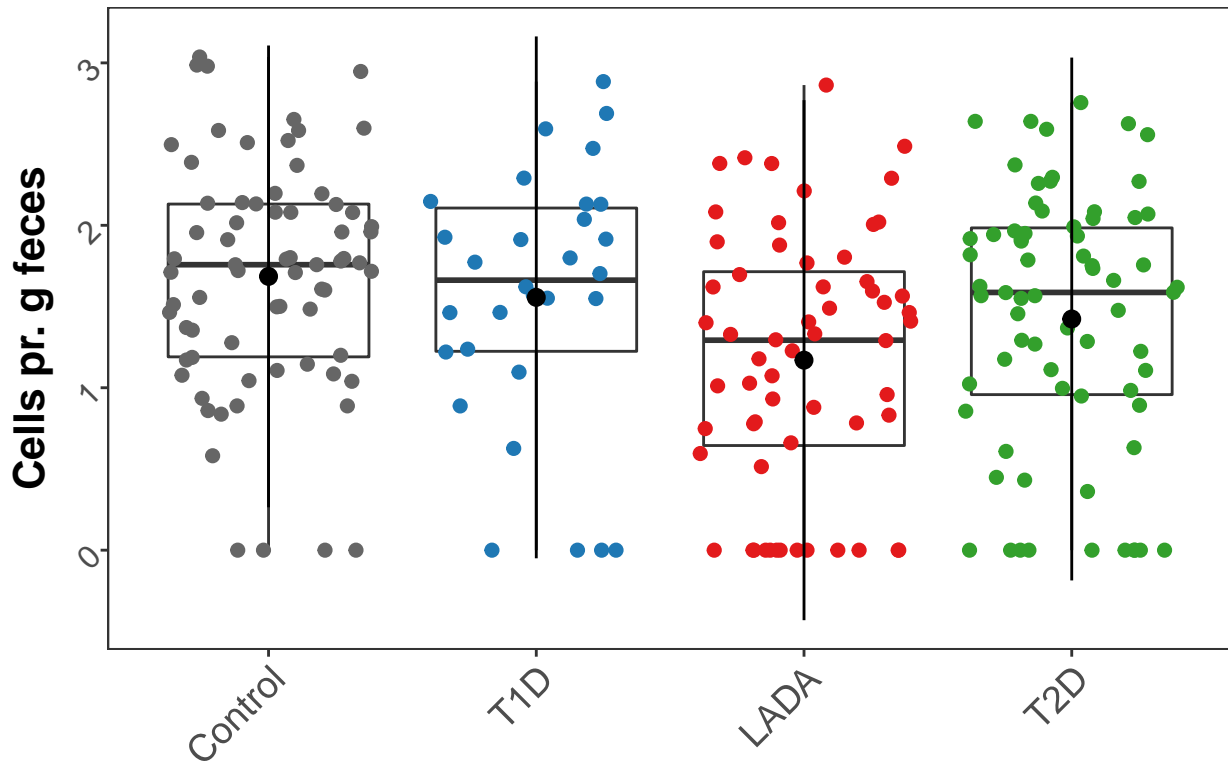

|     | pvalue    | padj      | Genus               | compare         |
|-----|-----------|-----------|---------------------|-----------------|
| 213 | 0.0043858 | 0.0641923 | Ruminiclostridium_5 | LADA vs Control |
| 131 | 0.0094080 | 0.1285754 | Ruminiclostridium_5 | Control vs T2D  |
| 377 | 0.3727788 | 0.6366683 | Ruminiclostridium_5 | LADA vs T1D     |
| 49  | 0.1562554 | 0.6671050 | Ruminiclostridium_5 | Control vs T1D  |
| 295 | 0.4775574 | 0.7388625 | Ruminiclostridium_5 | T1D vs T2D      |
| 459 | 0.8232229 | 0.9803916 | Ruminiclostridium_5 | LADA vs T2D     |

# Ruminiclostridium\_5

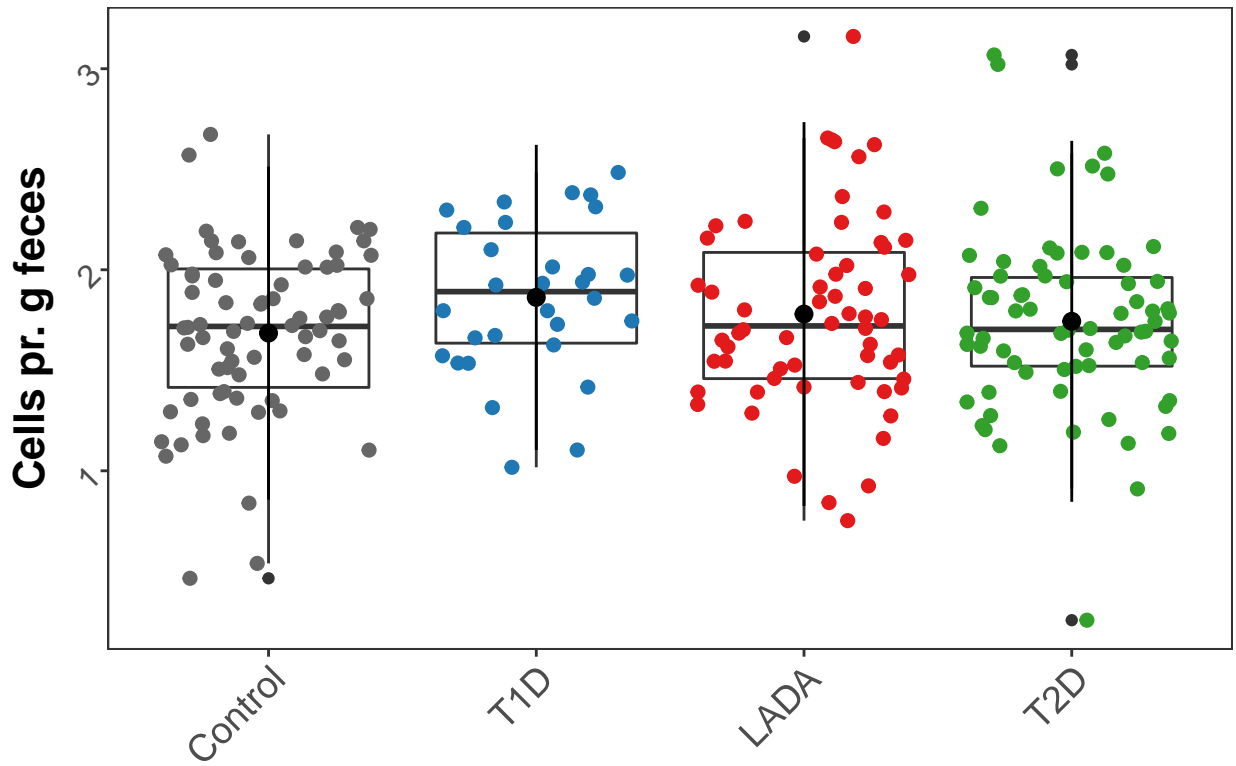

|     | pvalue    | padj      | Genus                       | compare         |
|-----|-----------|-----------|-----------------------------|-----------------|
| 235 | 0.0053507 | 0.0641923 | Family.Erysipelotrichaceae. | LADA vs Control |
| 153 | 0.0166478 | 0.1650890 | Family.Erysipelotrichaceae. | Control vs T2D  |
| 71  | 0.0254208 | 0.3474170 | Family.Erysipelotrichaceae. | Control vs T1D  |
| 317 | 0.8148660 | 0.9280418 | Family.Erysipelotrichaceae. | T1D vs T2D      |
| 481 | 0.7149626 | 0.9803916 | Family.Erysipelotrichaceae. | LADA vs T2D     |
| 399 | 0.9576265 | 0.9815672 | Family.Erysipelotrichaceae. | LADA vs T1D     |

# Family.Erysipelotrichaceae.

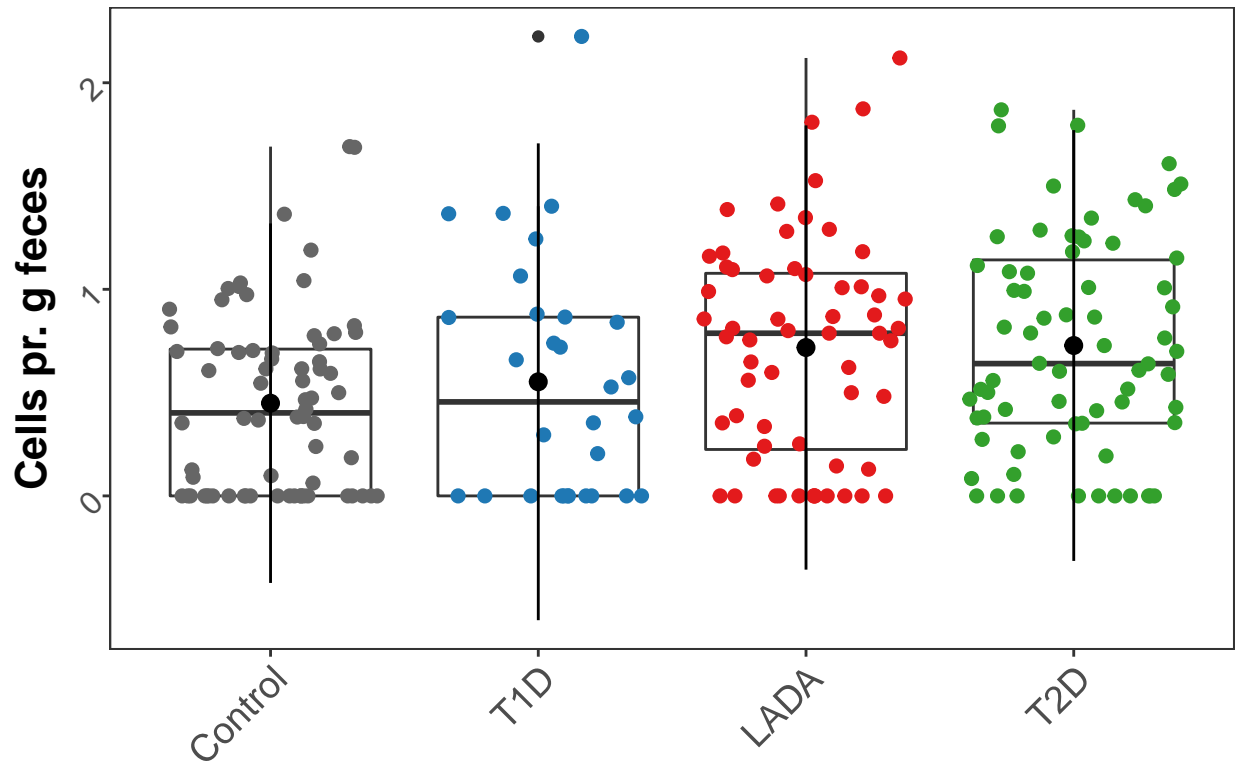

|     | pvalue    | padj      | Genus     | compare         |
|-----|-----------|-----------|-----------|-----------------|
| 203 | 0.0062627 | 0.0641923 | Roseburia | LADA vs Control |
| 39  | 0.0022094 | 0.0905858 | Roseburia | Control vs T1D  |
| 285 | 0.0197282 | 0.1797459 | Roseburia | T1D vs T2D      |
| 449 | 0.0485321 | 0.5204546 | Roseburia | LADA vs T2D     |
| 367 | 0.4314917 | 0.6760736 | Roseburia | LADA vs T1D     |
| 121 | 0.4477485 | 0.7962182 | Roseburia | Control vs T2D  |

# Roseburia

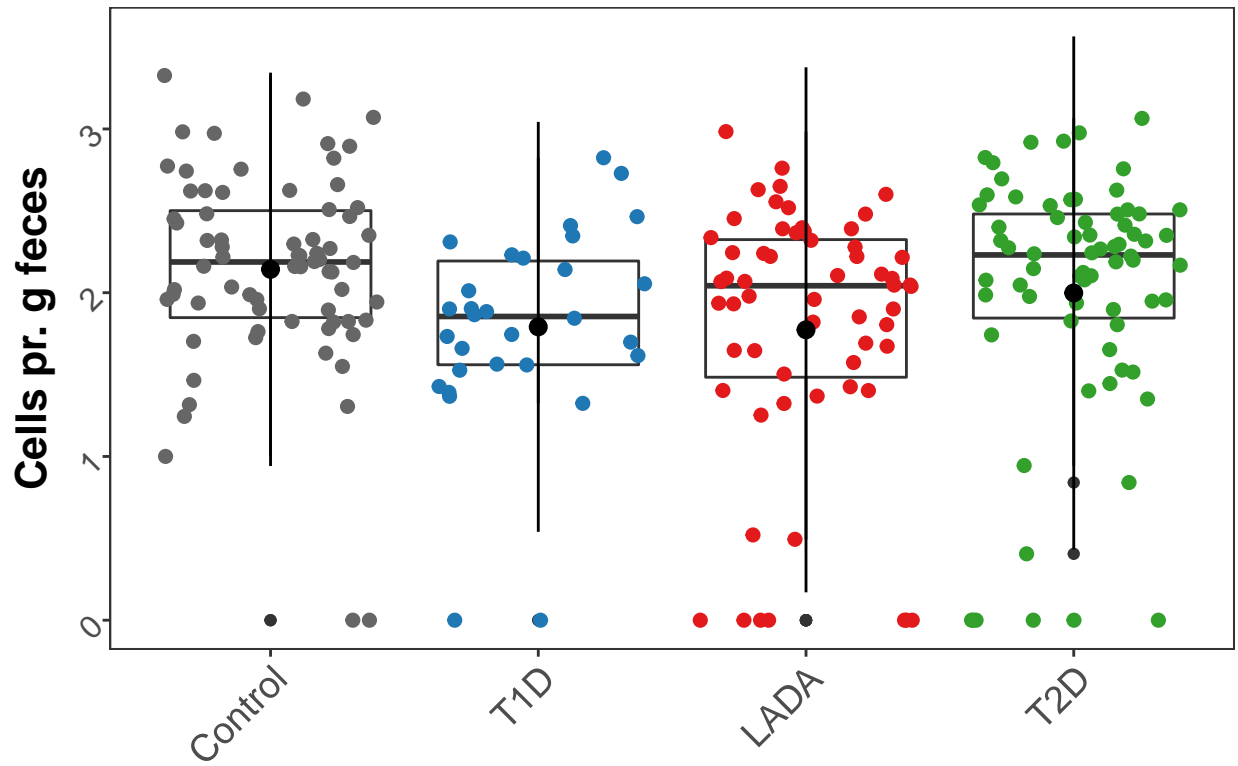

|     | pvalue    | padj      | Genus       | compare         |
|-----|-----------|-----------|-------------|-----------------|
| 196 | 0.0072854 | 0.0663784 | Lachnospira | LADA vs Control |
| 360 | 0.0273593 | 0.2492734 | Lachnospira | LADA vs T1D     |
| 114 | 0.0317613 | 0.2604427 | Lachnospira | Control vs T2D  |
| 278 | 0.0735948 | 0.3650550 | Lachnospira | T1D vs T2D      |
| 32  | 0.9361923 | 0.9615651 | Lachnospira | Control vs T1D  |
| 442 | 0.6075759 | 0.9724127 | Lachnospira | LADA vs T2D     |



# Lachnospira

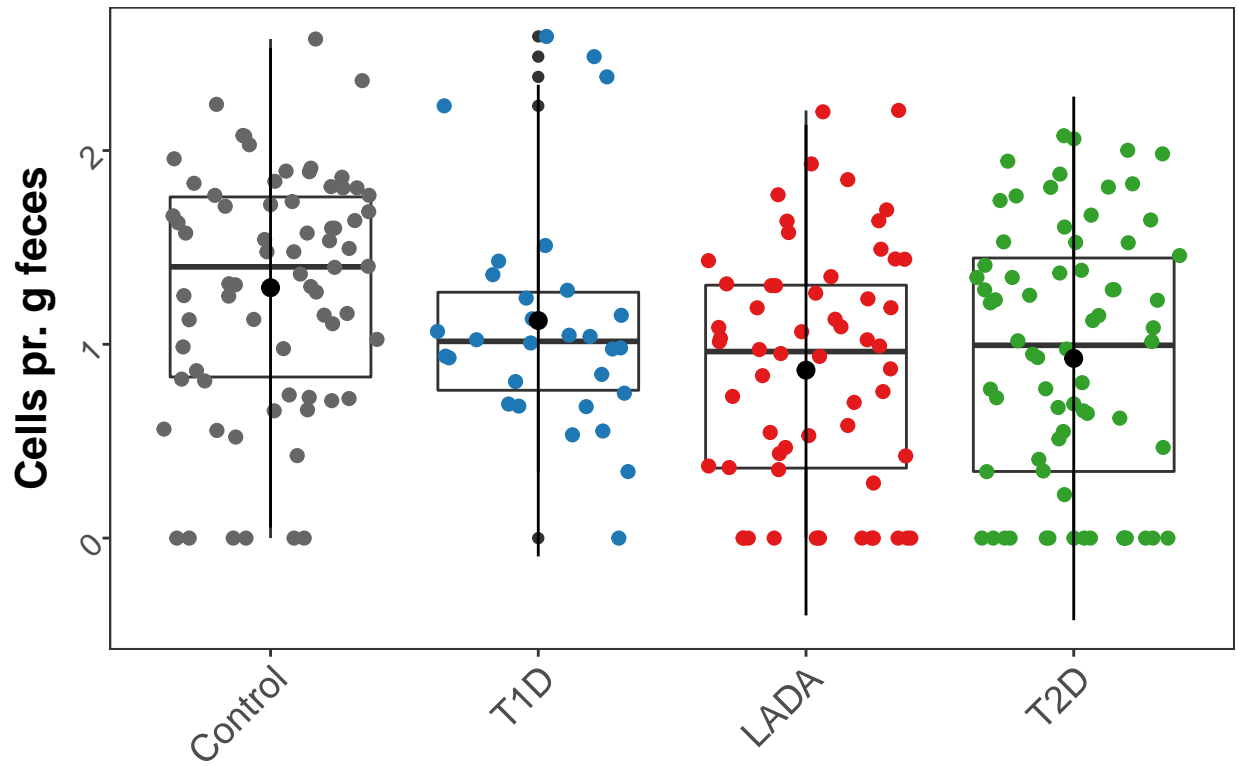

|     | pvalue    | padj      | Genus         | compare         |
|-----|-----------|-----------|---------------|-----------------|
| 344 | 0.0025974 | 0.0676607 | Lactobacillus | LADA vs T1D     |
| 180 | 0.0185493 | 0.1267534 | Lactobacillus | LADA vs Control |
| 262 | 0.1166548 | 0.3685716 | Lactobacillus | T1D vs T2D      |
| 426 | 0.0698171 | 0.5204546 | Lactobacillus | LADA vs T2D     |
| 16  | 0.2359274 | 0.6671050 | Lactobacillus | Control vs T1D  |
| 98  | 0.5881729 | 0.7962182 | Lactobacillus | Control vs T2D  |

# Lactobacillus

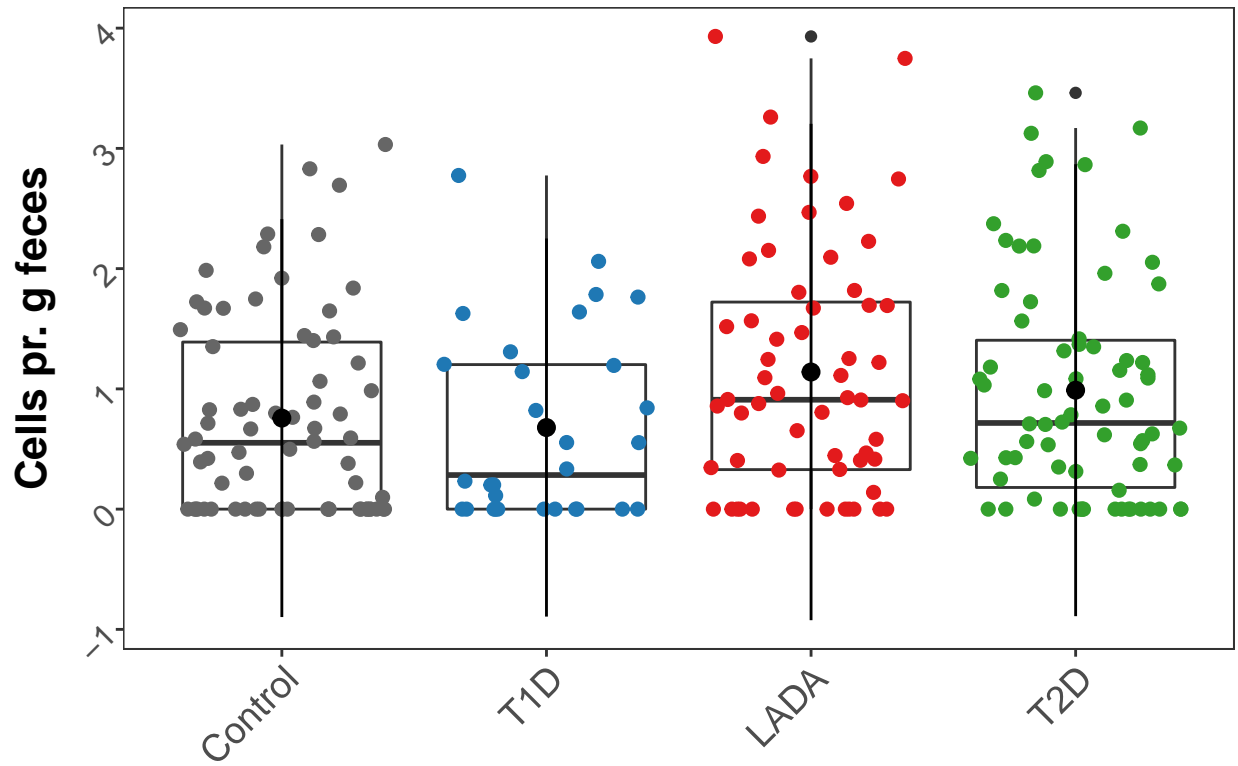

|     | pvalue    | padj      | Genus                         | compare         |
|-----|-----------|-----------|-------------------------------|-----------------|
| 346 | 0.0033005 | 0.0676607 | Christensenellaceae_R.7_group | LADA vs T1D     |
| 182 | 0.0285825 | 0.1674119 | Christensenellaceae_R.7_group | LADA vs Control |
| 264 | 0.0267350 | 0.2192269 | Christensenellaceae_R.7_group | T1D vs T2D      |
| 100 | 0.2002863 | 0.6220744 | Christensenellaceae_R.7_group | Control vs T2D  |
| 18  | 0.2132451 | 0.6671050 | Christensenellaceae_R.7_group | Control vs T1D  |
| 428 | 0.3697127 | 0.8916601 | Christensenellaceae_R.7_group | LADA vs T2D     |

# Christensenellaceae\_R.7\_group

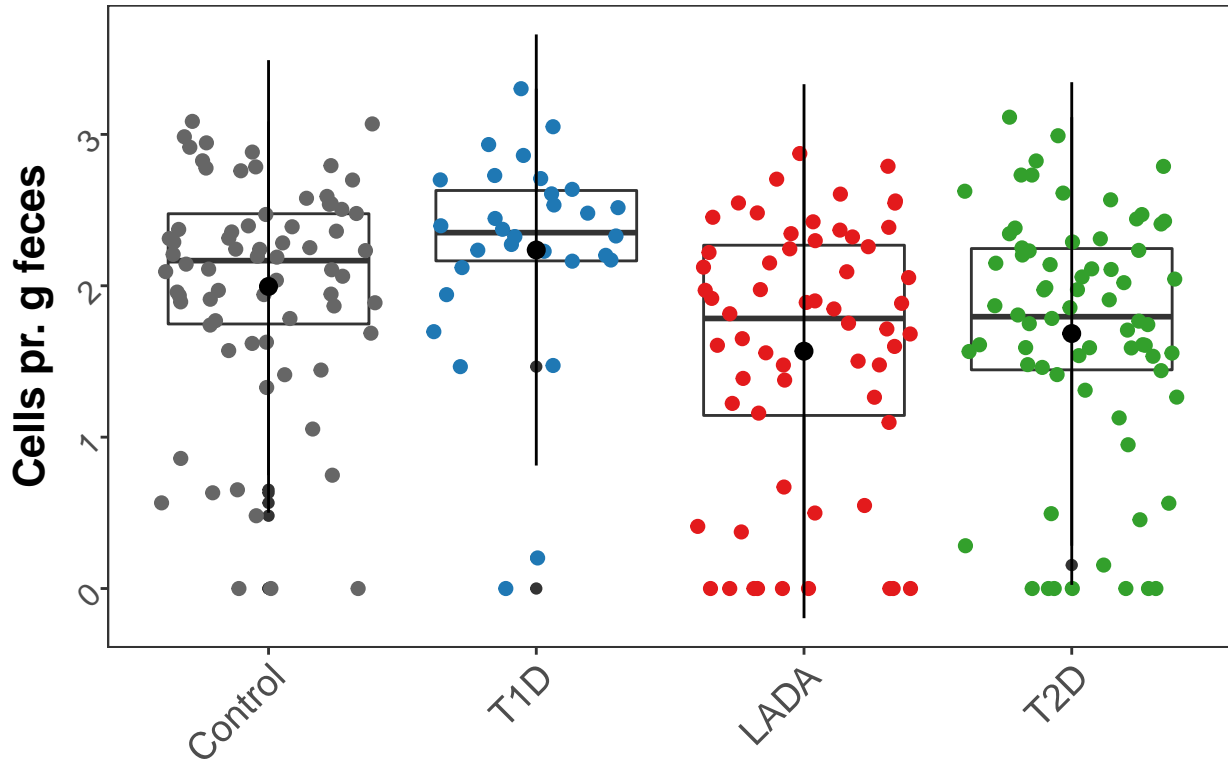

|     | pvalue    | padj      | Genus            | compare         |
|-----|-----------|-----------|------------------|-----------------|
| 194 | 0.0118524 | 0.0971897 | Fusicatenibacter | LADA vs Control |
| 112 | 0.0433784 | 0.3233661 | Fusicatenibacter | Control vs T2D  |
| 30  | 0.0939678 | 0.6421130 | Fusicatenibacter | Control vs T1D  |
| 358 | 0.7046549 | 0.8889492 | Fusicatenibacter | LADA vs T1D     |
| 440 | 0.6346494 | 0.9724127 | Fusicatenibacter | LADA vs T2D     |
| 276 | 0.9972992 | 0.9972992 | Fusicatenibacter | T1D vs T2D      |

# Fusicatenibacter

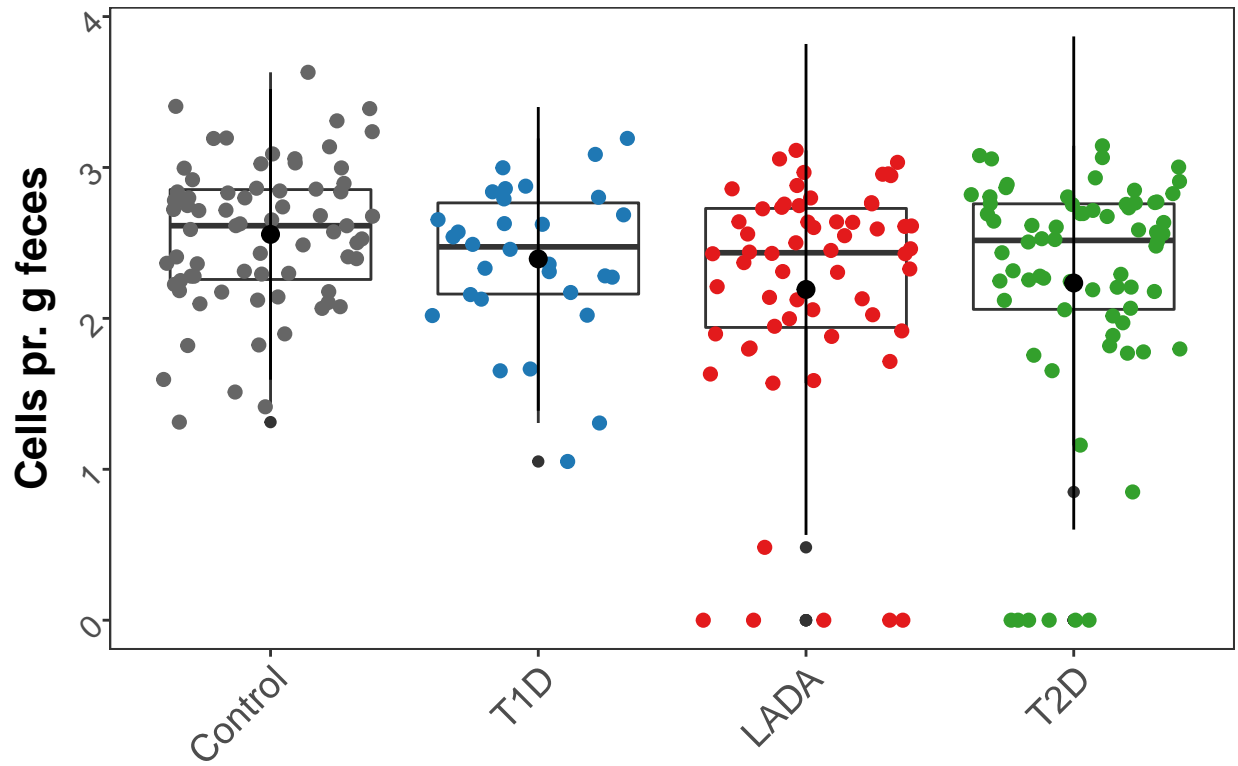

|     | pvalue    | padj      | Genus        | compare         |
|-----|-----------|-----------|--------------|-----------------|
| 187 | 0.1777630 | 0.4541213 | Anaerostipes | LADA vs Control |
| 105 | 0.1158433 | 0.4749576 | Anaerostipes | Control vs T2D  |
| 269 | 0.3294686 | 0.5806610 | Anaerostipes | T1D vs T2D      |
| 351 | 0.4302210 | 0.6760736 | Anaerostipes | LADA vs T1D     |
| 23  | 0.7716586 | 0.8754881 | Anaerostipes | Control vs T1D  |
| 433 | 0.8076673 | 0.9803916 | Anaerostipes | LADA vs T2D     |

# Anaerostipes

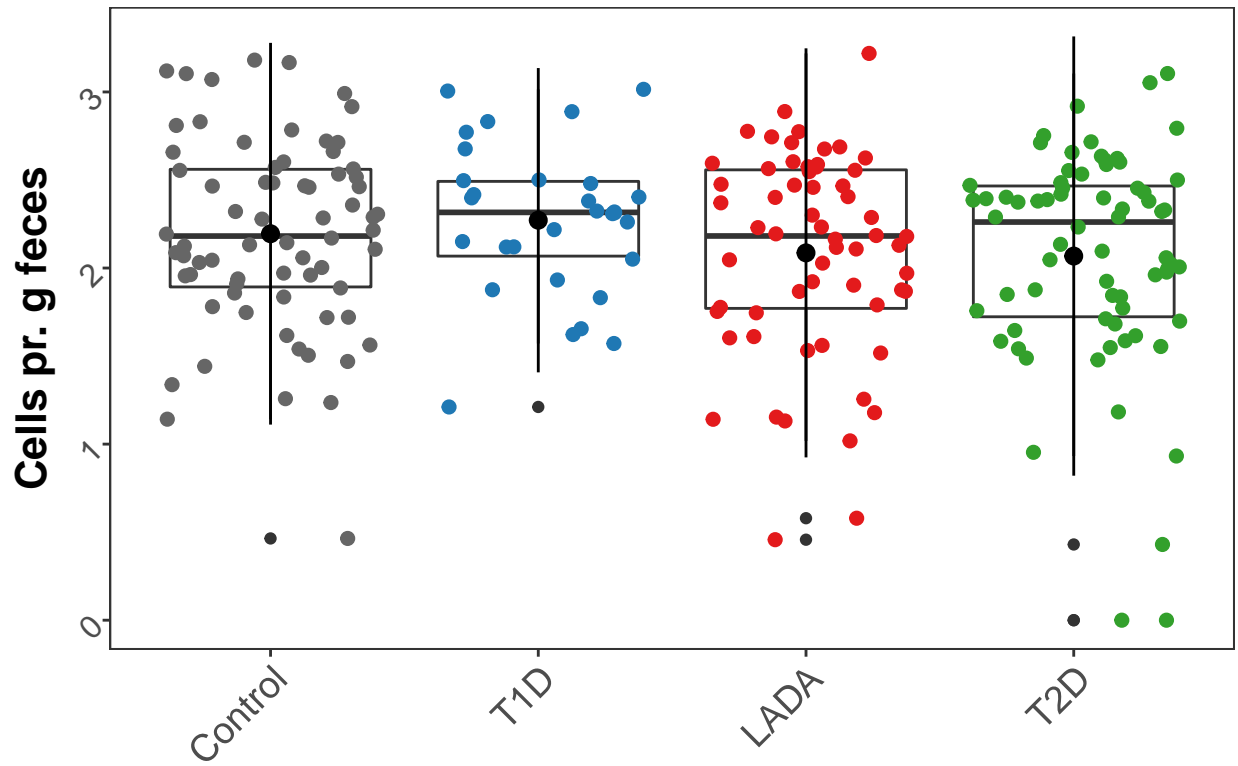

|     | pvalue    | padj      | Genus           | compare         |
|-----|-----------|-----------|-----------------|-----------------|
| 167 | 0.6798262 | 0.8710273 | Bifidobacterium | LADA vs Control |
| 3   | 0.7830703 | 0.8754881 | Bifidobacterium | Control vs T1D  |
| 249 | 0.7349926 | 0.9131726 | Bifidobacterium | T1D vs T2D      |
| 85  | 0.9257307 | 0.9608850 | Bifidobacterium | Control vs T2D  |
| 413 | 0.6109544 | 0.9724127 | Bifidobacterium | LADA vs T2D     |
| 331 | 0.9509381 | 0.9815672 | Bifidobacterium | LADA vs T1D     |

# Bifidobacterium

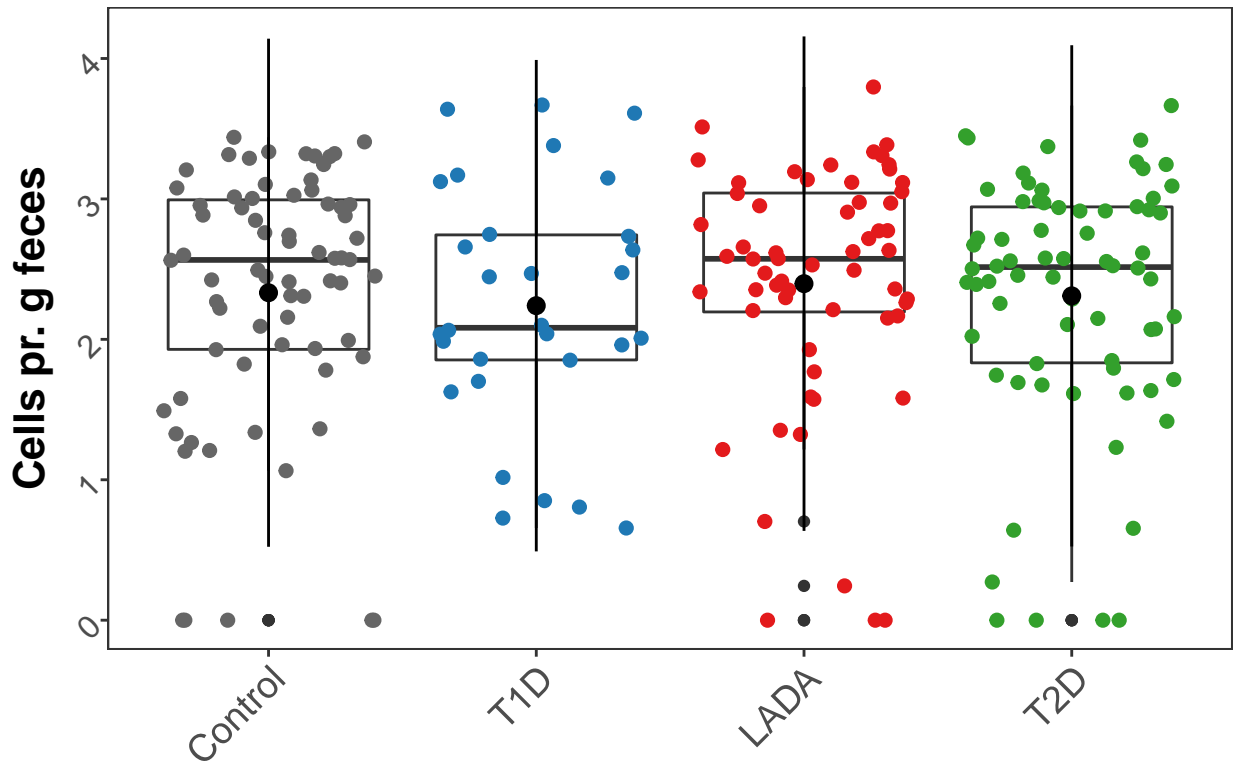

|     | pvalue    | padj      | Genus       | compare         |
|-----|-----------|-----------|-------------|-----------------|
| 245 | 0.1018599 | 0.3341004 | Akkermansia | LADA vs Control |
| 327 | 0.2812873 | 0.5517125 | Akkermansia | T1D vs T2D      |
| 81  | 0.1578675 | 0.6671050 | Akkermansia | Control vs T1D  |
| 163 | 0.7276007 | 0.8709821 | Akkermansia | Control vs T2D  |
| 491 | 0.1977348 | 0.8784397 | Akkermansia | LADA vs T2D     |
| 409 | 0.9473993 | 0.9815672 | Akkermansia | LADA vs T1D     |

# Akkermansia

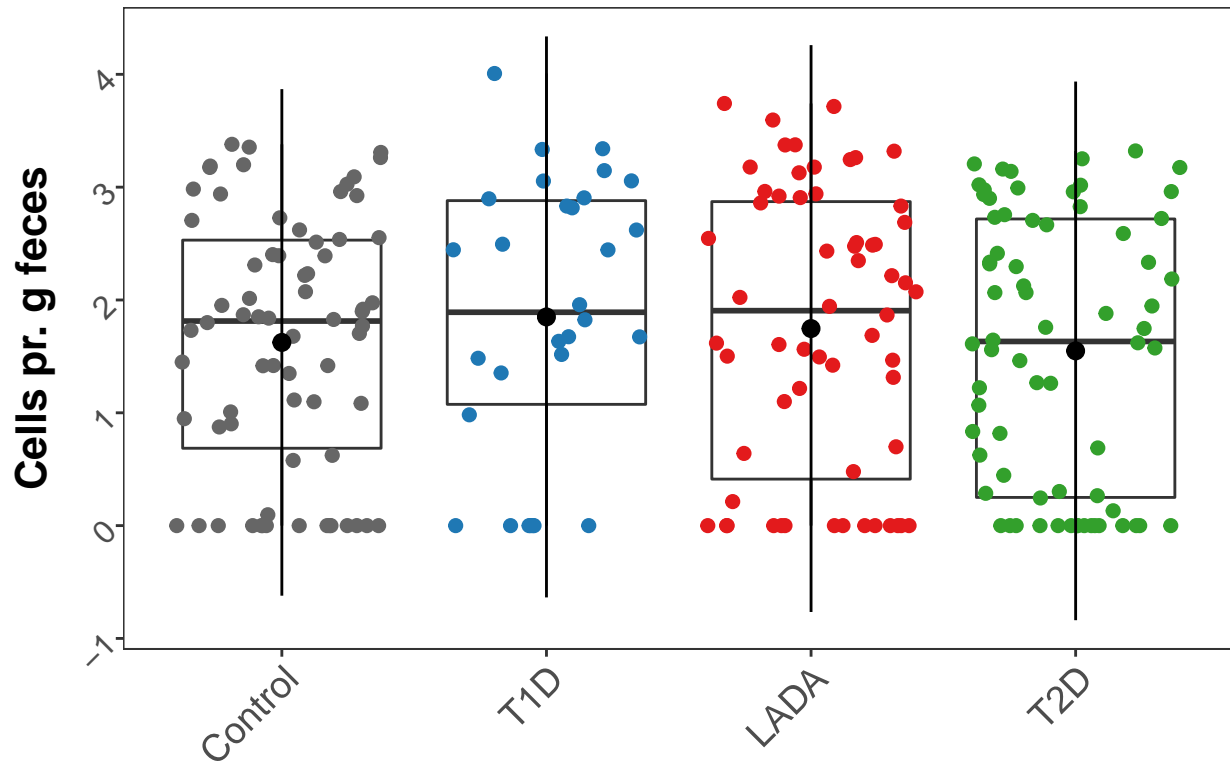

```
lay <- rbind(c(1,2,3))
pdf(paste("MicroLADA_GeneraDA.pdf", sep=""), width=15, height=5)
grid.arrange(Fig2List$Faecalibacterium,
             Fig2List$Roseburia,
             Fig2List$Butyricicoccus,layout_matrix = lay)
dev.off()
```

pdf 2

```
#ggplot(Plotting2, aes(x=BMI, y=Actinomyces)) +
# geom_point()
```

## DESeq Wald Remove metformin

All pairwise Differential abundance analysis comparison (DESeq and visualized venn)

```
rm(list=setdiff(ls(), c("Metadata", "MetadataMed", "Feature", "TaxonomyDA", "Taxonomy", "Fig2List")))
#Create a list to hold the plot objects.
Fig2ListRemMet <- list()

#Reassign names
#Metadata2<-Metadata
Taxonomy2<-TaxonomyDA
```

```

##Removing treated with metformin
#Metadata$Metformin <- ifelse(is.na(Metadata$Metformin), "Unknown", Metadata$Metformin)
Metadata2<-filter(Metadata, !Metformin == 1)
##Applying subsetting to OTU tables
Taxonomy2<-dplyr::select(Taxonomy2, one_of(as.character(Metadata2$MicrobiomeID)))
##Remove orgs that are not present after subsetting.
Taxonomy2 <- Taxonomy2[rowSums(Taxonomy2)>0,]

#Order Diagnosis
Metadata2$Diagnosis<-ordered(Metadata2$Diagnosis,
                             levels=c("Control", "T1D", "T2D", "LADA"))
#The factor can not be ordered for DESeq to run
Metadata2$Diagnosis<-factor(Metadata2$Diagnosis, ordered=FALSE)

#Create design formula
design <- formula(paste("~ ", "Diagnosis")) #To be consistent the analysis with metformin
#removed is always without correcting for BMI
#design <- formula(paste("~ ", "Diagnosis", "+", "BMIq"))
#design <- formula(paste("~ ", "Diagnosis", "+ Metformin"))
#Create DESeq2 object with matrix and metadata
dds <- DESeqDataSetFromMatrix(countData = Taxonomy2,
                              colData = Metadata2,
                              design = design)

##Assess and calculate size factors using the different methods
SF<-data.frame(Ratio=sizeFactors(estimateSizeFactors(dds, type="ratio")),
              Poscounts=sizeFactors(estimateSizeFactors(dds, type="poscounts")),
              #iterate takes a lot of time changed to poscounts but kept due to the
              #following code
              Iterate=sizeFactors(estimateSizeFactors(dds, type="poscounts")),
              Relative=colSums(Taxonomy2)/mean(colSums(Taxonomy2))
              )
SF<-add_rownames(SF, var="MicrobiomeID")
#Adding total abundances
# old path path<-paste("Q:/",
#                       "Projects/",
#                       "LADA/",
#                       "LADA_Sandra_Evelina/",
#                       "LADA_JKV/",
#                       "LADA_R_AfterFlow_Analysis_FinalCounts/",
#                       "LADA_FinalCounts/",
#                       "2019-09-03_CountAnalysis.rds", sep="")

path <- paste("J:/",
              "CBMR/",
              "SUN-CBMR-Hansen-Group/",
              "Projects/",
              "LADA/",
              "LADA_Sandra_Evelina/",

```



```

    "LADA_JKV/",
    "LADA_R_AfterFlow_Analysis_FinalCounts/",
    "LADA_FinalCounts/",
    "2019-09-03_CountAnalysis.rds", sep="")

TotalCounts<-readRDS(path)
TotalCountsProcess <-
  data.frame(MicrobiomeID=TotalCounts$DF_Save_w$ID,
             CellNorm=TotalCounts$DF_Save_w$Cells_per_g_feces_FR_corrected_mean)
TotalCountsProcess$MicrobiomeID <- paste("L", TotalCountsProcess$MicrobiomeID,
                                         sep="")
SF2<-merge(SF, TotalCountsProcess, by="MicrobiomeID")

#One value is NaN in sample 602059 assigns value as average
SF2$CellNorm[is.nan(SF2$CellNorm)]<-mean(na.omit(SF2$CellNorm))

SF2$CellNormStand<-SF2$CellNorm/mean(SF2$CellNorm) #Watch out for NaN values can assign
#average, but wants the error

SF3<-merge(Metadadata2, SF2, by="MicrobiomeID")
#DESeq divides with sizeFactor (High cell count should have low sizeFactor providing
#larger counts in a sample)
#Still have to consider seq data is relative
SF3$NormRelCell<-SF3$Relative/SF3$CellNormStand
#Overview of normalization factors
aggregate(SF3[, 14:20], list(SF3$Diagnosis), mean) #Have to run heatmap chunk adding sex

```

```

Group.1 Ratio Poscounts Iterate Relative CellNorm CellNormStand 1 Control 1.093106 1.002662 1.002662
0.9644647 20384275367 1.0722125 2 T1D 1.232576 1.261833 1.261833 1.1097233 18731782275 0.9852914 3
T2D 1.079416 0.942112 0.942112 0.9618292 16982538343 0.8932812 4 LADA 1.203409 1.213468 1.213468
1.0061418 15590817082 0.8200767 NormRelCell 1 1.008584 2 1.247425 3 1.183913 4 1.292202

```

```

#to metadata
aggregate(SF3[, 14:20], list(SF3$Diagnosis), sd)

```

```

Group.1 Ratio Poscounts Iterate Relative CellNorm CellNormStand 1 Control 0.4622606 0.2998114
0.2998114 0.2305348 6781846681 0.3567250 2 T1D 0.4965321 0.4582512 0.4582512 0.1825149 5712095609
0.3004561 3 T2D 0.5152121 0.3336165 0.3336165 0.2220192 4888235680 0.2571211 4 LADA 0.5245937
0.4814438 0.4814438 0.1937037 4604942130 0.2422199 NormRelCell 1 0.4800604 2 0.4881822 3 0.4797532 4
0.3379476

```

```

pairs(SF3[, c(14:17,19,20)], col=SF3$Diagnosis)

```

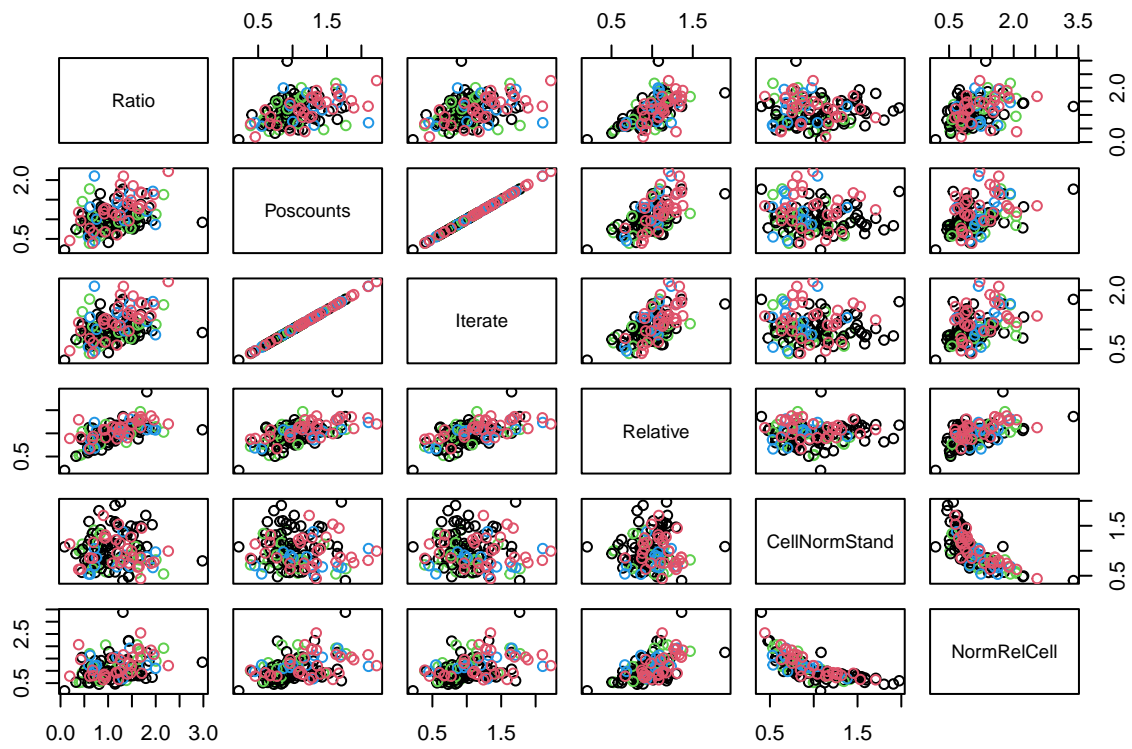

```
pairs(SF3[, c(15,17,19,20)], col=SF3$Diagnosis)
```

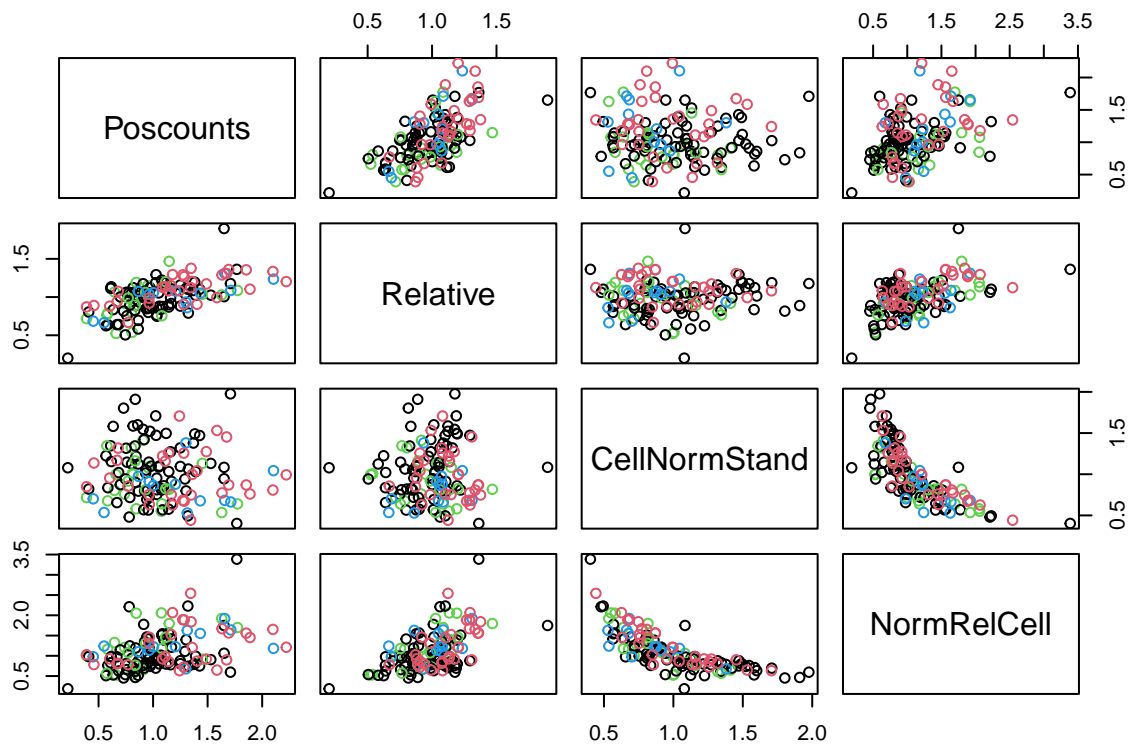

*#I do want CellNormStand and NormRelCell to be negatively correlated due to DESeq divide  
#with sizeFactor.  
#It is also good that CellNormStand seems uncorrelated to the other normalization factors.*

*##Select size factors calculated above for normalization*

```
dds@colData@listData$sizeFactor <- SF3[,20]
```

*##See vignette for note on factor levels*

*#Filtering of the Counttable. Bare minimum is performed later. Also to reduce memory of*

*#the dds*

```
dds <- dds[ rowSums(counts(dds))>(50*length(Taxonomy2)),] #Previously 0 instead of 1
```

*#Estimate dispersions and fit the GLM*

```
dds <- DESeq(dds)
```

```
res<-results(dds)
```

```
summary(res)
```

out of 81 with nonzero total read count adjusted p-value < 0.1 LFC > 0 (up) : 1, 1.2% LFC < 0 (down) : 0,  
0% outliers [1] : 0, 0% low counts [2] : 0, 0% (mean count < 44) [1] see 'cooksCutoff' argument of ?results  
[2] see 'independentFiltering' argument of ?results

```
resultsNames(dds)
```

[1] "Intercept" "Diagnosis\_T1D\_vs\_Control" [3] "Diagnosis\_T2D\_vs\_Control" "Diagnosis\_LADA\_vs\_Control"

```

#Threshold for FDR-adjusted p-values
padj_threshold <- 0.1

if (is.factor(colData(dds)[,"Diagnosis"]) == TRUE) {

#Find all two-wise combinations of levels in chosen test factor
test <- combn(levels(colData(dds)[,"Diagnosis"]), 2)
test[,3]<-c("LADA", "Control") #Want LADA first
test[,5]<-c("LADA", "T1D") #Want LADA first
test[,6]<-c("LADA", "T2D") #Want LADA first
foo = test[1,]
poo = test[2,]

#Do DESeq2 analysis on all combinations of levels and save as list
result <- vector("list",length(foo))
for (i in 1:length(foo) ) {
  for (j in 1:length(poo)) {
    result[i] = results(dds, contrast = c("Diagnosis" ,foo[i], poo[i]))
  }
}

#Produce output tables with significant taxa from each comparison
res_list <- vector("list",length(foo))
for (i in 1:length(result) ) {
  res_stat <- data.frame(result[i])
  res_stat <- res_stat[is.na(res_stat$pvalue) == FALSE,]
  stat_sig <- na.omit(res_stat[res_stat$padj < padj_threshold,])
  res_stat$gene <- rownames(res_stat)
  res_stat$g1 <- test[1,i]
  res_stat$g2 <- test[2,i]
  res_stat$compare <- paste(test[1,i], "vs", test[2,i])
  res_list[i] <- list(res_stat)
}

res_stat <- do.call('rbind', res_list)
rownames(res_stat) <- 1:nrow(res_stat)
res_stat <- res_stat[with(res_stat, order(padj, pvalue, abs(log2FoldChange))),]
stat_sig <- na.omit(res_stat[res_stat$padj < padj_threshold,])
}

if (is.numeric(colData(dds)[,"Diagnosis"]) == TRUE) {

res_stat <- data.frame((results(dds)))
res_stat$maxCooks <- apply(assays(dds)[["cooks"]], 1, max)
res_stat <- res_stat[is.na(res_stat$pvalue) == FALSE,]
res_stat <- res_stat[with(res_stat, order(padj, pvalue, abs(log2FoldChange))), ]
res_stat$gene <- rownames(res_stat)
max_cooks <- quantile(na.omit(res_stat$maxCooks), cooks_quantile_cutoff)
stat_sig <-
  na.omit(res_stat[res_stat$padj < padj_threshold & res_stat$maxCooks < max_cooks,])
}

#All comparisons

```

```
write.table(res_stat, file="DESeqRes_OrgsRemMet.txt", quote = F, row.names = F, sep="\t")

#Significant taxa in table
if (nrow(stat_sig) > 0) {
kable(stat_sig, row.names = F)
write.table(stat_sig, file="DESeqRes_SigOrgsRemMet.txt", quote = F, row.names = F, sep="\t")
} else {
  print("No significant taxa were found.")
}
print("Significant Wald")
```

[1] "Significant Wald"

```
kable(stat_sig)
```

|     | base       | Meanlog2  | FoldChange | log2SE   | stat      | pvalue    | padj                | gene    | g1      | g2              | compare |
|-----|------------|-----------|------------|----------|-----------|-----------|---------------------|---------|---------|-----------------|---------|
| 211 | 697.4217   | 1.5832131 | 0.4268749  | 3.708845 | 0.0002082 | 0.0168647 | Ruminiclostridium_5 | LADA    | Control | LADA vs Control |         |
| 44  | 14234.2496 | 1.0587494 | 0.2977373  | 3.555987 | 0.0003766 | 0.0229456 | Faecalibacterium    | Control | T1D     | Control vs T1D  |         |
| 39  | 1611.25971 | 1.2643592 | 0.3667852  | 3.447138 | 0.0005666 | 0.0229456 | Roseburia           | Control | T1D     | Control vs T1D  |         |
| 251 | 507.8234   | 2.5736292 | 0.7098165  | 3.625767 | 0.0002881 | 0.0233367 | Family.Eggerthella  | Control | T2D     | T1D vs T2D      |         |
| 89  | 507.8234   | 2.1949066 | 0.6156984  | 3.564905 | 0.0003640 | 0.0294830 | Family.Eggerthella  | Control | T2D     | Control vs T2D  |         |
| 274 | 626.6481   | -         | 0.4333450  | -        | 0.0008905 | 0.0360666 | Lachnoclostridium   | T1D     | T2D     | T1D vs T2D      |         |
|     |            | 1.4400079 |            | 3.323005 |           |           |                     |         |         |                 |         |
| 259 | 1626.63391 | 1.8809095 | 0.5865600  | 3.206679 | 0.0013428 | 0.0362547 | Streptococcus       | T1D     | T2D     | T1D vs T2D      |         |
| 286 | 854.9916   | -         | 0.3375294  | -        | 0.0020208 | 0.0409217 | Butyricoccus        | T1D     | T2D     | T1D vs T2D      |         |
|     |            | 1.0420055 |            | 3.087155 |           |           |                     |         |         |                 |         |
| 43  | 854.9916   | 0.8229626 | 0.2658188  | 3.095954 | 0.0019618 | 0.0529689 | Butyricoccus        | Control | T1D     | Control vs T1D  |         |
| 293 | 289.8053   | 1.9703268 | 0.6798502  | 2.898178 | 0.0037534 | 0.0608047 | Ruminiclostridium_5 | T1D     | T2D     | T1D vs T2D      |         |
| 97  | 1626.63391 | 1.6090377 | 0.5086963  | 3.163063 | 0.0015612 | 0.0632286 | Streptococcus       | Control | T2D     | Control vs T2D  |         |
| 21  | 5945.13881 | 1.0283974 | 0.3493362  | 2.943862 | 0.0032414 | 0.0656392 | Agathobacter        | Control | T1D     | Control vs T1D  |         |
| 112 | 626.6481   | -         | 0.3757587  | -        | 0.0032266 | 0.0871181 | Lachnoclostridium   | Control | T2D     | Control vs T2D  |         |
|     |            | 1.1067154 |            | 2.945283 |           |           |                     |         |         |                 |         |

```
kable(stat_sig[,c(5:7,10)])
```

|     | pvalue    | padj      | gene                | compare         |
|-----|-----------|-----------|---------------------|-----------------|
| 211 | 0.0002082 | 0.0168647 | Ruminiclostridium_5 | LADA vs Control |
| 44  | 0.0003766 | 0.0229456 | Faecalibacterium    | Control vs T1D  |
| 39  | 0.0005666 | 0.0229456 | Roseburia           | Control vs T1D  |

|     | pvalue    | padj      | gene                    | compare        |
|-----|-----------|-----------|-------------------------|----------------|
| 251 | 0.0002881 | 0.0233365 | Family.Eggerthellaceae. | T1D vs T2D     |
| 89  | 0.0003640 | 0.0294830 | Family.Eggerthellaceae. | Control vs T2D |
| 274 | 0.0008905 | 0.0360666 | Lachnospirillum         | T1D vs T2D     |
| 259 | 0.0013428 | 0.0362547 | Streptococcus           | T1D vs T2D     |
| 286 | 0.0020208 | 0.0409217 | Butyricoccus            | T1D vs T2D     |
| 43  | 0.0019618 | 0.0529689 | Butyricoccus            | Control vs T1D |
| 293 | 0.0037534 | 0.0608047 | Ruminiclostridium_6     | T1D vs T2D     |
| 97  | 0.0015612 | 0.0632280 | Streptococcus           | Control vs T2D |
| 21  | 0.0032414 | 0.0656392 | Agathobacter            | Control vs T1D |
| 112 | 0.0032266 | 0.0871181 | Lachnospirillum         | Control vs T2D |

### ##Venn diagram comparing LADA to other groups

```
sig_LADA <- subset(stat_sig, g1=="LADA")
sig_LADA_T1D <- subset(sig_LADA, g2=="T1D") %>% dplyr::select(one_of("gene")) %>%
  pull(gene)
sig_LADA_T2D <- subset(sig_LADA, g2=="T2D") %>% dplyr::select(one_of("gene")) %>%
  pull(gene)
sig_LADA_Control <- subset(sig_LADA, g2=="Control") %>% dplyr::select(one_of("gene")) %>%
  pull(gene)
```

### #Colors

```
myCol <- c( "#1F78B4", "#33A02C", "#666666")
```

```
#
```

```
temp <- venn.diagram(list(T1D = sig_LADA_T1D,
                        T2D = sig_LADA_T2D,
                        Control = sig_LADA_Control), filename = NULL,
```

### # Circles

```
lwd = 2,
lty = 'blank',
fill = myCol,
```

### # Numbers

```
cex = 3,
fontface = "bold",
fontfamily = "sans",
```

### # Set names

```
cat.cex = 3,
cat.fontface = "bold",
cat.default.pos = "outer",
cat.pos = c(0, 0, 0),
cat.dist = c(0.085, 0.085, 0.024),
cat.fontfamily = "sans",
rotation = 1)
```

```
grid.arrange(gTree(children=temp))
```

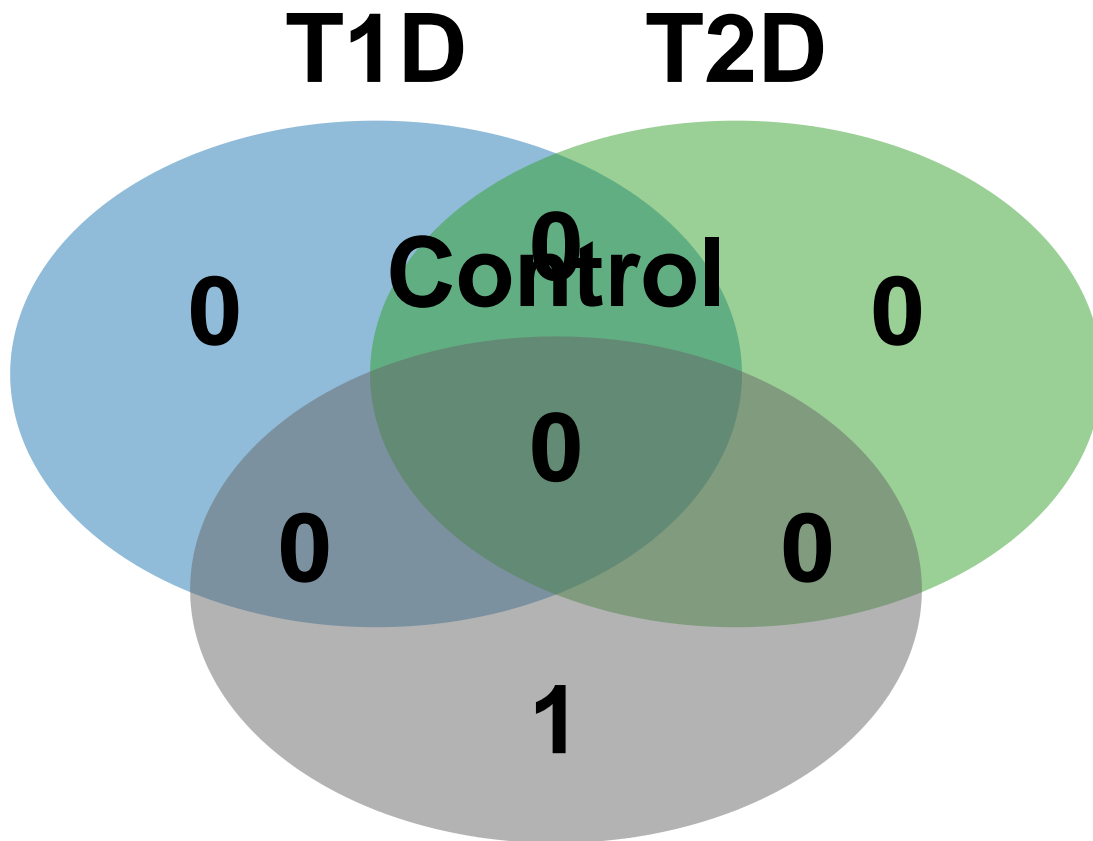

```
Fig2ListRemMet[[ "VennLADA" ]] <-
  gTree(children=temp, top="N differential abundant relative to LADA")
```

```
#Genera LADA that are significantly different from all other groups
intersect(intersect(sig_LADA_T1D,sig_LADA_T2D),sig_LADA_Control)
```

```
character(0)
```

```
##Venn diagram comparing T1D to other groups
sig_T1D <- subset(stat_sig, g1=="T1D" | g2=="T1D")
sig_T1D_LADA <- subset(sig_T1D, g1=="LADA") %>% dplyr::select(one_of("gene")) %>%
  pull(gene)
sig_T1D_T2D <- subset(sig_T1D, g2=="T2D") %>% dplyr::select(one_of("gene")) %>%
  pull(gene)
sig_T1D_Control <- subset(sig_T1D, g1=="Control") %>% dplyr::select(one_of("gene")) %>%
  pull(gene)
#Colors
myCol <- c( "#E31A1C", "#33A02C", "#666666")
#
temp <- venn.diagram(list(LADA = sig_T1D_LADA,
                        T2D = sig_T1D_T2D,
                        Control = sig_T1D_Control), filename = NULL,

# Circles
lwd = 2,
```

```

lty = 'blank',
fill = myCol,

# Numbers
cex = 2,
fontface = "bold",
fontfamily = "sans",

# Set names
cat.cex = 2,
cat.fontface = "bold",
cat.default.pos = "outer",
cat.pos = c(0, 0, 0),
cat.dist = c(0.055, 0.055, 0.024),
cat.fontfamily = "sans",
rotation = 1)

```

```
grid.arrange(gTree(children=temp))
```

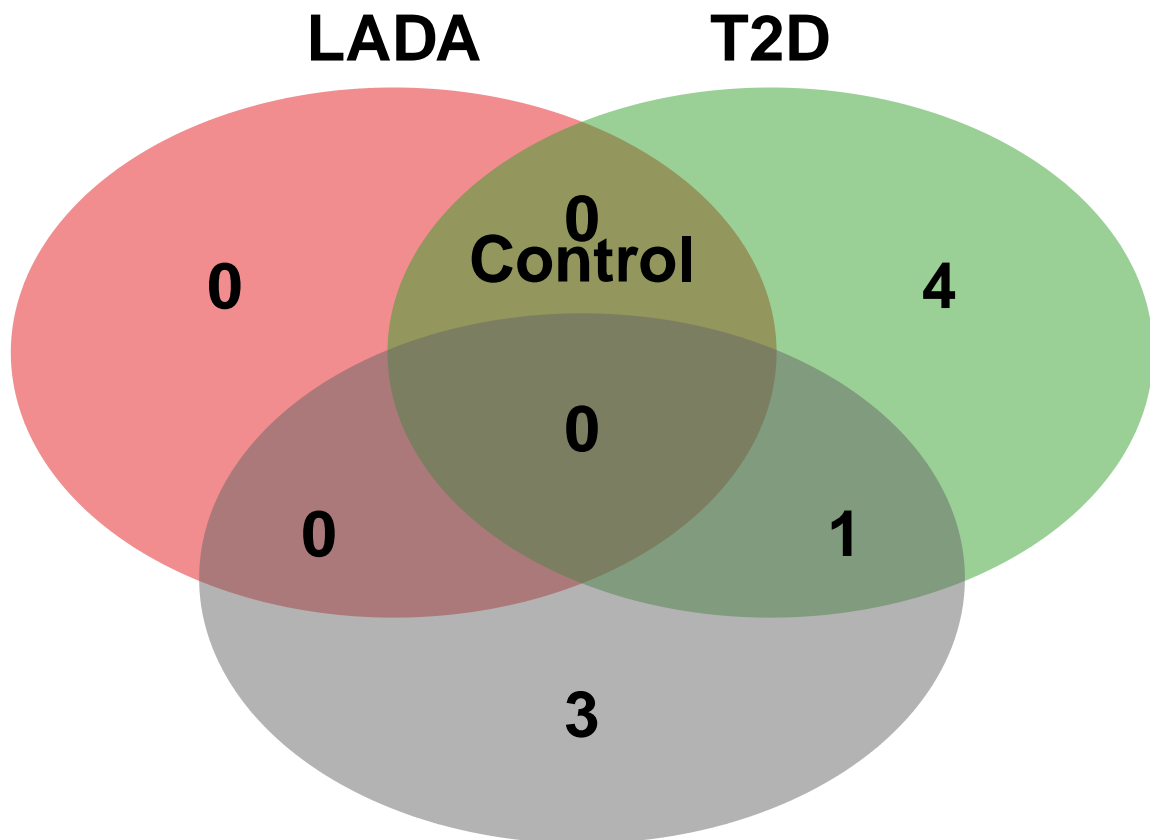

```

Fig2ListRemMet[[ "VennT1D" ]] <-
  gTree(children=temp, top="N differential abundant relative to T1D")

#Genera T1D that are significantly different from all other groups
intersect(intersect(sig_T1D_LADA,sig_T1D_T2D),sig_T1D_Control)

```



character(0)

```
##Venn diagram comparing T2D to other groups
sig_T2D <- subset(stat_sig, g1=="T2D" | g2=="T2D")
sig_T2D_LADA <- subset(sig_T2D, g1=="LADA") %>% dplyr::select(one_of("gene")) %>%
  pull(gene)
sig_T2D_T1D <- subset(sig_T2D, g1=="T1D") %>% dplyr::select(one_of("gene")) %>%
  pull(gene)
sig_T2D_Control <- subset(sig_T2D, g1=="Control") %>% dplyr::select(one_of("gene")) %>%
  pull(gene)
#Colors
myCol <- c( "#E31A1C", "#1F78B4", "#666666")
#
temp <- venn.diagram(list(LADA = sig_T2D_LADA,
                        T1D = sig_T2D_T1D,
                        Control = sig_T2D_Control), filename = NULL,

                    # Circles
                    lwd = 2,
                    lty = 'blank',
                    fill = myCol,

                    # Numbers
                    cex = 2,
                    fontface = "bold",
                    fontfamily = "sans",

                    # Set names
                    cat.cex = 2,
                    cat.fontface = "bold",
                    cat.default.pos = "outer",
                    cat.pos = c(0, 0, 0),
                    cat.dist = c(0.055, 0.055, 0.024),
                    cat.fontfamily = "sans",
                    rotation = 1)

grid.arrange(gTree(children=temp))
```

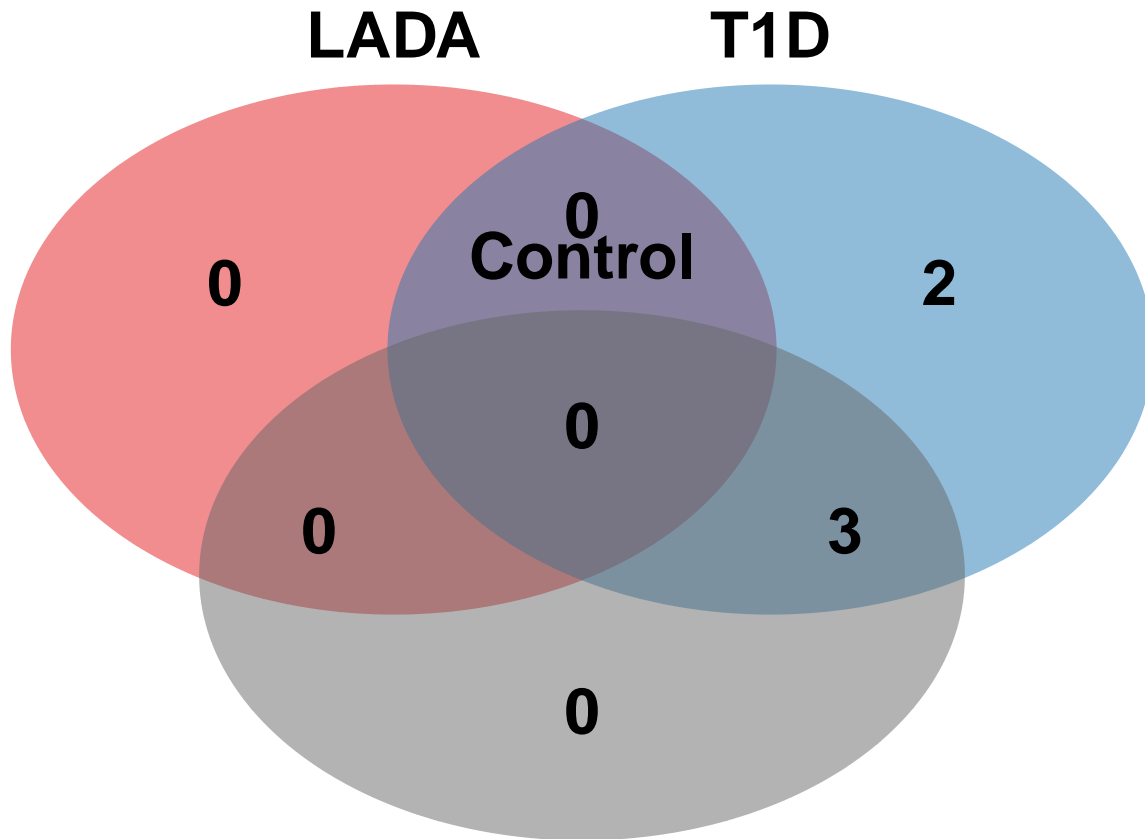

```
Fig2ListRemMet[[ "VennT2D" ]] <-
  gTree(children=temp, top="N differential abundant relative to T2D")
```

```
#Genera T2D that are significantly different from all other groups
intersect(intersect(sig_T2D_LADA,sig_T2D_T1D),sig_T2D_Control)
```

```
character(0)
```

```
##Venn diagram comparing controls to other groups
```

```
sig_Control <- subset(stat_sig, g1=="Control" | g2=="Control")
sig_Control_LADA <- subset(sig_Control, g1=="LADA") %>% dplyr::select(one_of("gene")) %>%
  pull(gene)
```

```
sig_Control_T1D <- subset(sig_Control, g2=="T1D") %>% dplyr::select(one_of("gene")) %>%
  pull(gene)
```

```
sig_Control_T2D <- subset(sig_Control, g2=="T2D") %>% dplyr::select(one_of("gene")) %>%
  pull(gene)
```

```
#Colors
```

```
myCol <- c( "#E31A1C", "#1F78B4", "#33A02C")
```

```
#
```

```
temp <- venn.diagram(list(LADA = sig_Control_LADA,
                          T1D = sig_Control_T1D,
                          T2D = sig_Control_T2D), filename = NULL,
```

```
# Circles
```

```
lwd = 2,
```

```

lty = 'blank',
fill = myCol,

# Numbers
cex = 3,
fontface = "bold",
fontfamily = "sans",

# Set names
cat.cex = 3,
cat.fontface = "bold",
cat.default.pos = "outer",
cat.pos = c(0, 0, 0),
cat.dist = c(0.055, 0.055, 0.024),
cat.fontfamily = "sans",
rotation = 1)

```

```
grid.arrange(gTree(children=temp))
```

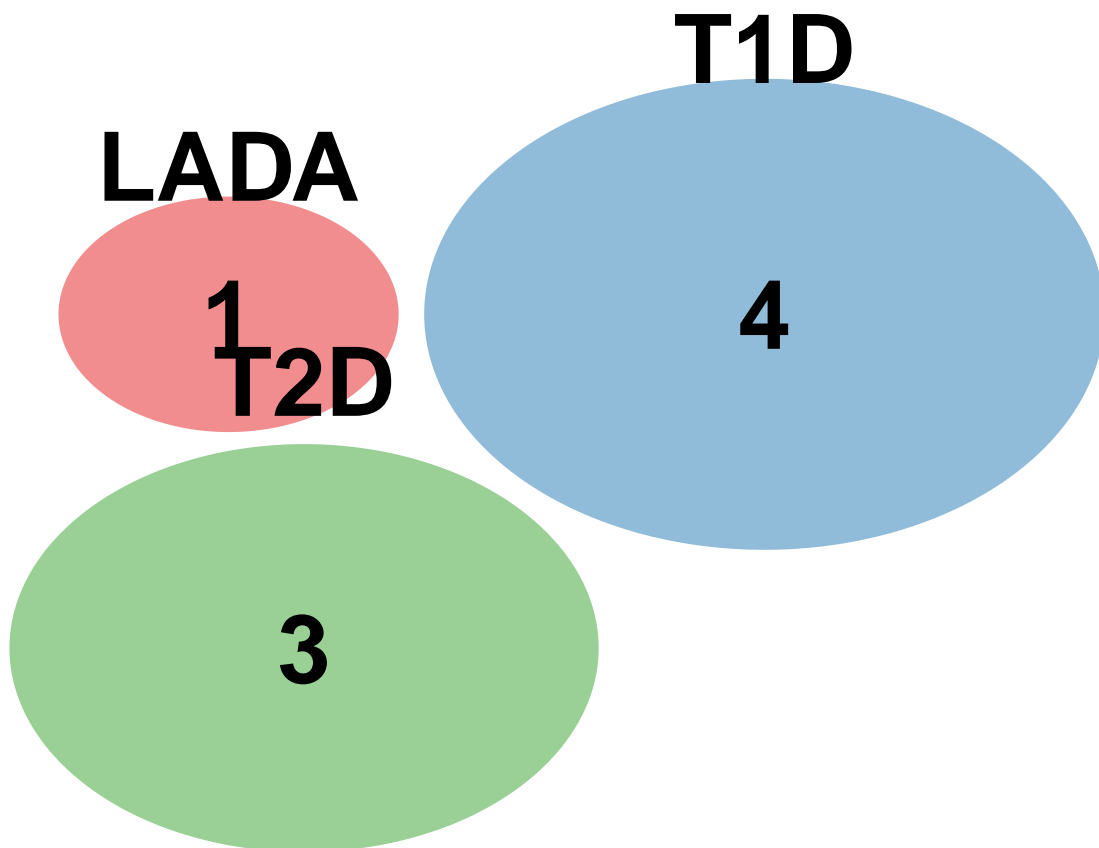

```

Fig2ListRemMet[[ "VennControls" ]] <-
  gTree(children=temp, top="N differential abundant relative to controls")

```

```

#Genera Controls that are significantly different from all other groups
intersect(intersect(sig_T2D_LADA,sig_T2D_T1D),sig_T2D_Control)

```

character(0)

```
##Create boxplots / violin plots
#Normalize to get cells pr. gram feces
if (setequal(colnames(Taxonomy2), SF3$MicrobiomeID)==FALSE) {
  stop("Metadata and Taxonomy out of sync")
}

#Total sum scaling (Use relative abundances)
Taxonomy3<-sweep(Taxonomy2, 2, colSums(Taxonomy), FUN="/")
#Obtain values as cells pr. gram feces
Taxonomy3<-sweep(Taxonomy3, 2, SF3$CellNorm, FUN="*")
#Make to micro gram
Taxonomy3<-Taxonomy3/10^6

##Select organisms
SelOrgs<-unique(stat_sig$gene)
##Add SCFA producers see Venegas et al. 2019
SelOrgs<-unique(c(SelOrgs,
                  "Faecalibacterium", #prausnitzii
#                  "Clostridium", #leptum present as sensu stricto 1
#                  "Eubacterium", #rectale or hallii, here linosum
                  "Roseburia", #
                  "Anaerostipes",
                  "Bifidobacterium",
                  "Butyricicoccus",
                  "Akkermansia"))

tTaxSelect<-dplyr::select(as.data.frame(t(Taxonomy3)), one_of(c(SelOrgs)))
#Reducing the number because duplicates are removed
tTaxSelect<-add_rownames(tTaxSelect, "MicrobiomeID")
Plotting<-merge(SF3, tTaxSelect, by="MicrobiomeID")

##Might have issues with special characters, so this chunk might be needed
SelOrgs<-str_replace(SelOrgs, " ", "_")
SelOrgs<-str_replace(SelOrgs, "/", "_")
SelOrgs<-gsub("\\[|\\]", "", SelOrgs)
SelOrgs<-str_replace(SelOrgs, ":", "_")
colnames(Plotting) <- str_replace(colnames(Plotting), " ", "_")
colnames(Plotting) <- str_replace(colnames(Plotting), "/", "_")
colnames(Plotting) <- gsub("\\[|\\]", "", colnames(Plotting))
colnames(Plotting) <- str_replace(colnames(Plotting), ":", "_")

#Plot logs on y axis
Plotting2 <- bind_cols(Plotting[,1:16], log10(Plotting[,17:ncol(Plotting)]+1))
#See end of chunk for boxplots removed the violinplots, because of redundancy

##Create vulcano plots
#Cut offs Benjamini-Hochberg method to add to vulcano plot
#Don't know how to get exact so it is a cut-off corresponding to the BH method
BHAll<-aggregate(stat_sig[, 5:6], list(stat_sig$compare), max)
row.names(BHAll)<-BHAll$Group.1
```

```

BHLadaCon <- BHA11[which(rownames(BHA11)=="LADA vs Control"),
                 which(colnames(BHA11)=="pvalue")]
BHLadaT1D <- BHA11[which(rownames(BHA11)=="LADA vs T1D"),
                 which(colnames(BHA11)=="pvalue")]
BHLadaT2D <- BHA11[which(rownames(BHA11)=="LADA vs T2D"),
                 which(colnames(BHA11)=="pvalue")]

#Vulcano plot
res_stat$minuslog10<--log(res_stat$pvalue)
#
#range(res_stat$minuslog10)
#range(res_stat$log2FoldChange)

names(res_stat)[names(res_stat) == 'gene'] <- 'Genus'
Feature2<-merge(res_stat, Feature, by="Genus")

#Create column org grouping for colouring
Feature2$Phyla <- ifelse(Feature2$Phylum=="Firmicutes", "Firmicutes",
                        ifelse(Feature2$Phylum=="Proteobacteria", "Proteobacteria",
                                ifelse(Feature2$Phylum=="Actinobacteria", "Actinobacteria",
                                        ifelse(Feature2$Phylum=="Bacteroidetes", "Bacteroidetes",
                                                ifelse(Feature2$Phylum=="Euryarchaeota", "Euryarchaeota",
                                                        "Other")))))
#Order Phyla for plotting
Feature2$Phyla <- factor(Feature2$Phyla, levels=c("Proteobacteria", "Bacteroidetes",
                                                "Actinobacteria", "Firmicutes",
                                                "Euryarchaeota", "Other"))

##Summary significant orgs
#aggregate(Plotting[, 17:ncol(Plotting)], list(Plotting$Diagnosis), mean)
#aggregate(Plotting[, 17:ncol(Plotting)], list(Plotting$Diagnosis), sd)
zeroes <- function(x){
  sum(x == 0)
}
#aggregate(Plotting[, 17:ncol(Plotting)], list(Plotting$Diagnosis), zeroes)
zerocounts <- aggregate(Plotting[, 17:ncol(Plotting)], list(Plotting$Diagnosis), zeroes)
#bind_cols(zerocounts[,1], zerocounts[,2:ncol(zerocounts)]/c(70,30,70,70)*100)

#Add prevalence to plotting
prevalence<-data.frame((240-apply(Taxonomy, 1, zeroes))/240*100)
colnames(prevalence) <- c("Prevalence")
prevalence<-add_rownames(prevalence, var = "Genus")
Feature2 <- merge(Feature2, prevalence, by="Genus")

#Define boundaries
#Always run first without these lines to get indication of very low and high
#log2FoldChange and pvalue
Featurein <- filter(Feature2, -3<log2FoldChange & log2FoldChange<3 & 10>minuslog10)
Featureout <- filter(Feature2, -3>log2FoldChange | 3<log2FoldChange | 10<minuslog10)

```

```

Featureout$log2FoldChange[Featureout$log2FoldChange > 3] <- 3
Featureout$log2FoldChange[Featureout$log2FoldChange < (-3)] <- -3
Featureout$minuslog10[Featureout$minuslog10 > 10] <- 10

#Add text to volcano plots
p1<-ggplot() +
  geom_point(data=Featurein[which(Featurein$Phyla=="Proteobacteria" &
    Featurein$compare=="LADA vs T1D"), ],
    aes(x=log2FoldChange, y=minuslog10, group=Genus, color="#A6CEE3", shape=16,
    size=Featurein[which(Featurein$Phyla=="Proteobacteria" &
    Featurein$compare=="LADA vs T1D"), ]
    [,ncol(Featurein)]/40+0.5) +
  #did not add jitter to the first on purpose. Sizes are scaled from percent
#to the range 0.5-3
  geom_point(data=Featureout[which(Featureout$Phyla=="Proteobacteria" &
    Featureout$compare=="LADA vs T1D"), ],
    aes(x=log2FoldChange, y=minuslog10, group=Genus), color="#A6CEE3", shape=18,
    size=Featureout[which(Featureout$Phyla=="Proteobacteria" &
    Featureout$compare=="LADA vs T1D"), ]
    [,ncol(Featureout)]/40+0.5) +
  geom_point(data=Featurein[which(Featurein$Phyla=="Bacteroidetes" &
    Featurein$compare=="LADA vs T1D"), ],
    aes(x=log2FoldChange, y=minuslog10, group=Genus), color="#FB9A99", shape=16,
    size=Featurein[which(Featurein$Phyla=="Bacteroidetes" &
    Featurein$compare=="LADA vs T1D"), ]
    [,ncol(Featurein)]/40+0.5) +
  geom_jitter(data=Featureout[which(Featureout$Phyla=="Bacteroidetes" &
    Featureout$compare=="LADA vs T1D"), ],
    aes(x=log2FoldChange, y=minuslog10, group=Genus), color="#FB9A99", shape=18,
    size=Featureout[which(Featureout$Phyla=="Bacteroidetes" &
    Featureout$compare=="LADA vs T1D"), ]
    [,ncol(Featureout)]/40+0.5, width = 0.1, height = 0.1) +
  geom_point(data=Featurein[which(Featurein$Phyla=="Actinobacteria" &
    Featurein$compare=="LADA vs T1D"), ],
    aes(x=log2FoldChange, y=minuslog10, group=Genus), color="#FDBF6F", shape=16,
    size=Featurein[which(Featurein$Phyla=="Actinobacteria" &
    Featurein$compare=="LADA vs T1D"), ]
    [,ncol(Featurein)]/40+0.5) +
  geom_jitter(data=Featureout[which(Featureout$Phyla=="Actinobacteria" &
    Featureout$compare=="LADA vs T1D"), ],
    aes(x=log2FoldChange, y=minuslog10, group=Genus), color="#FDBF6F", shape=18,
    size=Featureout[which(Featureout$Phyla=="Actinobacteria" &
    Featureout$compare=="LADA vs T1D"), ]
    [,ncol(Featureout)]/40+0.5, width = 0.1, height = 0.1) +
  geom_point(data=Featurein[which(Featurein$Phyla=="Firmicutes" &
    Featurein$compare=="LADA vs T1D"), ],
    aes(x=log2FoldChange, y=minuslog10, group=Genus),
    color="#B2DF8A", shape=16, alpha=0.75,
    size=Featurein[which(Featurein$Phyla=="Firmicutes" &
    Featurein$compare=="LADA vs T1D"), ]
    [,ncol(Featurein)]/40+0.5) +
  geom_jitter(data=Featureout[which(Featureout$Phyla=="Firmicutes" &

```

```

        Featureout$compare=="LADA vs T1D"), ],
aes(x=log2FoldChange, y=minuslog10, group=Genus),
color="#B2DF8A", shape=18,
size=Featureout[which(Featureout$Phyla=="Firmicutes" &
        Featureout$compare=="LADA vs T1D"), ]
[,ncol(Featureout)]/40+0.5, width = 0.1, height = 0.1) +
geom_point(data=Featurein[which(Featurein$Phyla=="Euryarchaeota" &
        Featurein$compare=="LADA vs T1D"), ],
aes(x=log2FoldChange, y=minuslog10, group=Genus), color="#CAB2D6", shape=16,
size=Featurein[which(Featurein$Phyla=="Euryarchaeota" &
        Featurein$compare=="LADA vs T1D"), ]
[,ncol(Featurein)]/40+0.5) +
geom_jitter(data=Featureout[which(Featureout$Phyla=="Euryarchaeota" &
        Featureout$compare=="LADA vs T1D"), ],
aes(x=log2FoldChange, y=minuslog10, group=Genus), color="#CAB2D6", shape=18,
size=Featureout[which(Featureout$Phyla=="Euryarchaeota" &
        Featureout$compare=="LADA vs T1D"), ]
[,ncol(Featureout)]/40+0.5, width = 0.1, height = 0.1) +
geom_point(data=Featurein[which(Featurein$Phyla=="Other" &
        Featurein$compare=="LADA vs T1D"), ],
aes(x=log2FoldChange, y=minuslog10, group=Genus), color="#B3B3B3", shape=16,
size=Featurein[which(Featurein$Phyla=="Other" &
        Featurein$compare=="LADA vs T1D"), ]
[,ncol(Featurein)]/40+0.5) +
geom_jitter(data=Featureout[which(Featureout$Phyla=="Other" &
        Featureout$compare=="LADA vs T1D"), ],
aes(x=log2FoldChange, y=minuslog10, group=Genus), color="#B3B3B3", shape=18,
size=Featureout[which(Featureout$Phyla=="Other" &
        Featureout$compare=="LADA vs T1D"), ]
[,ncol(Featureout)]/40+0.5, width = 0.1, height = 0.1) +
geom_text(data=Featurein[which(Featurein$padj<padj_threshold &
        Featurein$compare=="LADA vs T1D"), ],
aes(x=log2FoldChange, y=minuslog10, group=Genus, label=Genus),
nudge_y = 0.2, size=2.5) +
geom_text(data=Featureout[which(Featureout$padj<padj_threshold &
        Featureout$compare=="LADA vs T1D"), ],
aes(x=log2FoldChange, y=minuslog10, group=Genus, label=Genus),
nudge_x=0.6, nudge_y = -0.2, size=2.5) +
# geom_text(data=Featureout[which(Featureout$padj<padj_threshold &
#         Featureout$compare=="LADA vs T1D" &
#         Featureout$Genus=="Rikenellaceae_RC9_gut_group"), ],
#         aes(x=log2FoldChange, y=minuslog10, group=Genus, label=Genus),
#         nudge_x=1.22, nudge_y = 0) +
geom_hline(yintercept = -log(0.05), linetype="dashed") +
geom_hline(yintercept = -log(BHLadaT1D), linetype="dashed", alpha=0.1) +
geom_vline(xintercept = -1, linetype="dashed") +
geom_vline(xintercept = 1, linetype="dashed") +
theme_bw() +
ggtitle("T1D") +
xlab("Log2 fold change") +
ylab("-log10(P)") +
theme(panel.grid.major = element_blank(),
        panel.grid.minor = element_blank(),

```

```

axis.title=element_text(size=22),
legend.position="bottom",
legend.title=element_text(size=20),
legend.text=element_text(size=20),
axis.text.x = element_text(angle = 45, hjust = 1, size=12),
axis.text.y = element_text(angle = 45, hjust = 1, size=12),
plot.title = element_text(size = 22, hjust=0.5))
#ggplotly(p1)
p1

```

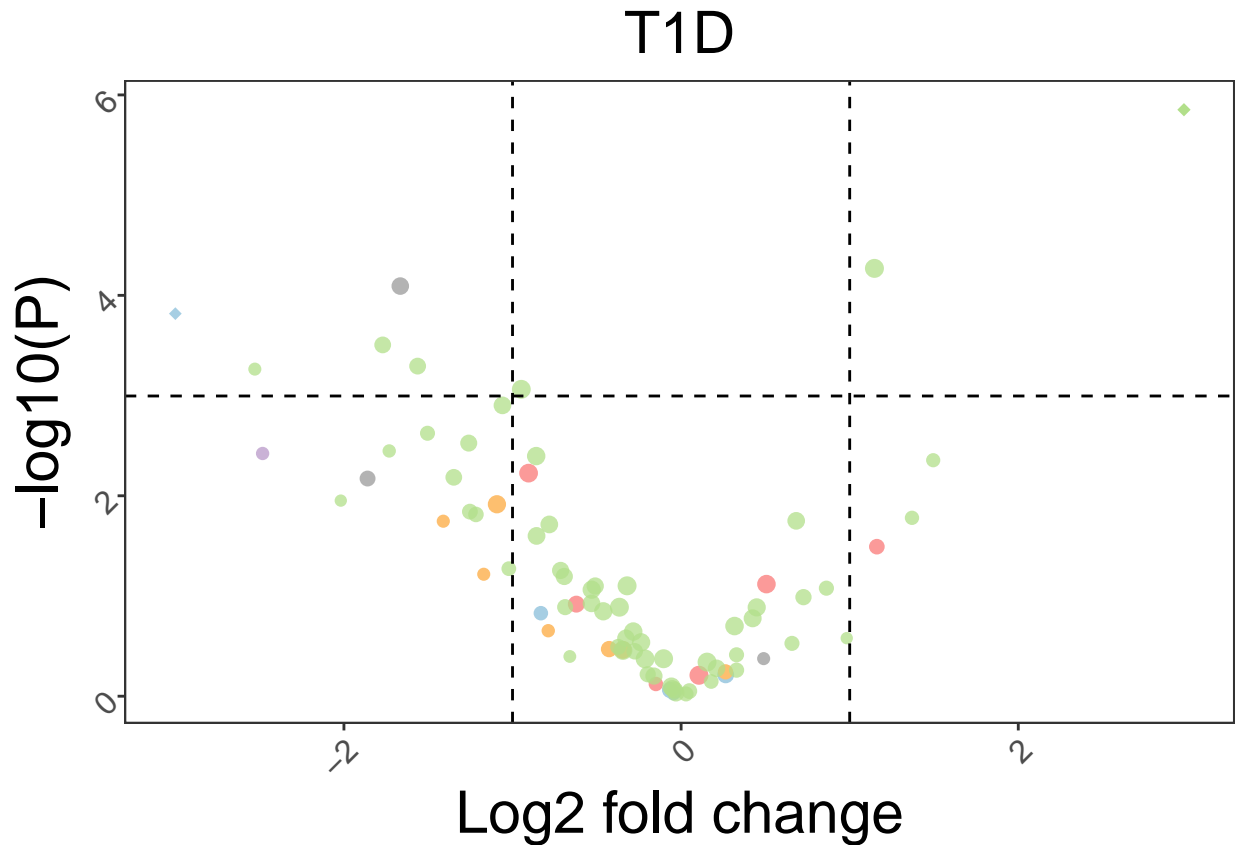

```
Fig2ListRemMet[["vulcLadaT1D"]] <- p1
```

```

p2<-ggplot() +
  geom_point(data=Featurein[which(Featurein$Phyla=="Proteobacteria" &
    Featurein$compare=="LADA vs T2D"), ],
    aes(x=log2FoldChange, y=minuslog10, group=Genus), color="#A6CEE3", shape=16,
    size=Featurein[which(Featurein$Phyla=="Proteobacteria" &
    Featurein$compare=="LADA vs T2D"), ]
    [,ncol(Featurein)]/40+0.5) +
  #did not add jitter to the first on purpose. Sizes are scaled from percent
  #to the range 0.5-3
  geom_point(data=Featureout[which(Featureout$Phyla=="Proteobacteria" &
    Featureout$compare=="LADA vs T2D"), ],
    aes(x=log2FoldChange, y=minuslog10, group=Genus), color="#A6CEE3", shape=18,

```



```

    size=Featureout[which(Featureout$Phyla=="Proteobacteria" &
      Featureout$compare=="LADA vs T2D"), ]
    [,ncol(Featureout)]/40+0.5) +
geom_point(data=Featurein[which(Featurein$Phyla=="Bacteroidetes" &
  Featurein$compare=="LADA vs T2D"), ],
  aes(x=log2FoldChange, y=minuslog10, group=Genus, color="#FB9A99", shape=16,
  size=Featurein[which(Featurein$Phyla=="Bacteroidetes" &
    Featurein$compare=="LADA vs T2D"), ]
    [,ncol(Featurein)]/40+0.5) +
geom_jitter(data=Featureout[which(Featureout$Phyla=="Bacteroidetes" &
  Featureout$compare=="LADA vs T2D"), ],
  aes(x=log2FoldChange, y=minuslog10, group=Genus, color="#FB9A99", shape=18,
  size=Featureout[which(Featureout$Phyla=="Bacteroidetes" &
    Featureout$compare=="LADA vs T2D"), ]
    [,ncol(Featureout)]/40+0.5,
  width = 0.1, height = 0.1) +
geom_point(data=Featurein[which(Featurein$Phyla=="Actinobacteria" &
  Featurein$compare=="LADA vs T2D"), ],
  aes(x=log2FoldChange, y=minuslog10, group=Genus, color="#FDBF6F", shape=16,
  size=Featurein[which(Featurein$Phyla=="Actinobacteria" &
    Featurein$compare=="LADA vs T2D"), ]
    [,ncol(Featurein)]/40+0.5) +
geom_jitter(data=Featureout[which(Featureout$Phyla=="Actinobacteria" &
  Featureout$compare=="LADA vs T2D"), ],
  aes(x=log2FoldChange, y=minuslog10, group=Genus), color="#FDBF6F", shape=18,
  size=Featureout[which(Featureout$Phyla=="Actinobacteria" &
    Featureout$compare=="LADA vs T2D"), ]
    [,ncol(Featureout)]/40+0.5, width = 0.1, height = 0.1) +
geom_point(data=Featurein[which(Featurein$Phyla=="Firmicutes" &
  Featurein$compare=="LADA vs T2D"), ],
  aes(x=log2FoldChange, y=minuslog10, group=Genus),
  color="#B2DF8A", shape=16, alpha=0.75,
  size=Featurein[which(Featurein$Phyla=="Firmicutes" &
    Featurein$compare=="LADA vs T2D"), ]
    [,ncol(Featurein)]/40+0.5) +
geom_jitter(data=Featureout[which(Featureout$Phyla=="Firmicutes" &
  Featureout$compare=="LADA vs T2D"), ],
  aes(x=log2FoldChange, y=minuslog10, group=Genus),
  color="#B2DF8A", shape=18,
  size=Featureout[which(Featureout$Phyla=="Firmicutes" &
    Featureout$compare=="LADA vs T2D"), ]
    [,ncol(Featureout)]/40+0.5, width = 0.1, height = 0.1) +
geom_point(data=Featurein[which(Featurein$Phyla=="Euryarchaeota" &
  Featurein$compare=="LADA vs T2D"), ],
  aes(x=log2FoldChange, y=minuslog10, group=Genus), color="#CAB2D6", shape=16,
  size=Featurein[which(Featurein$Phyla=="Euryarchaeota" &
    Featurein$compare=="LADA vs T2D"), ]
    [,ncol(Featurein)]/40+0.5) +
geom_jitter(data=Featureout[which(Featureout$Phyla=="Euryarchaeota" &
  Featureout$compare=="LADA vs T2D"), ],
  aes(x=log2FoldChange, y=minuslog10, group=Genus), color="#CAB2D6", shape=18,
  size=Featureout[which(Featureout$Phyla=="Euryarchaeota" &
    Featureout$compare=="LADA vs T2D"), ]

```

```

    [,ncol(Featureout)]/40+0.5, width = 0.1, height = 0.1) +
geom_point(data=Featurein[which(Featurein$Phyla=="Other" &
    Featurein$compare=="LADA vs T2D"), ],
    aes(x=log2FoldChange, y=minuslog10, group=Genus), color="#B3B3B3", shape=16,
    size=Featurein[which(Featurein$Phyla=="Other" &
    Featurein$compare=="LADA vs T2D"), ]
    [,ncol(Featurein)]/40+0.5) +
geom_jitter(data=Featureout[which(Featureout$Phyla=="Other" &
    Featureout$compare=="LADA vs T2D"), ],
    aes(x=log2FoldChange, y=minuslog10, group=Genus), color="#B3B3B3", shape=18,
    size=Featureout[which(Featureout$Phyla=="Other" &
    Featureout$compare=="LADA vs T2D"), ]
    [,ncol(Featureout)]/40+0.5, width = 0.1, height = 0.1) +
geom_text(data=Featurein[which(Featurein$padj<padj_threshold &
    Featurein$compare=="LADA vs T2D"), ],
    aes(x=log2FoldChange, y=minuslog10, group=Genus, label=Genus),
    nudge_y = 0.2, size=2.5) +
geom_text(data=Featureout[which(Featureout$padj<padj_threshold &
    Featureout$compare=="LADA vs T2D"), ],
    aes(x=log2FoldChange, y=minuslog10, group=Genus, label=Genus),
    nudge_x=0.6, nudge_y = -0.2, size=2.5) +
# geom_text(data=Featureout[which(Featureout$padj<padj_threshold &
#     Featureout$compare=="LADA vs T1D" &
#     Featureout$Genus=="Rikenellaceae_RC9_gut_group"), ],
#     aes(x=log2FoldChange, y=minuslog10, group=Genus, label=Genus),
#     nudge_x=1.22, nudge_y = 0) +
geom_hline(yintercept = -log(0.05), linetype="dashed") +
geom_hline(yintercept = -log(BHLadaT2D), linetype="dashed", alpha=0.1) +
geom_vline(xintercept = -1, linetype="dashed") +
geom_vline(xintercept = 1, linetype="dashed") +
theme_bw() +
ggtitle("T2D") +
xlab("Log2 fold change") +
ylab("-log10(P)") +
theme(panel.grid.major = element_blank(),
    panel.grid.minor = element_blank(),
    axis.title=element_text(size=22),
    legend.position="bottom",
    legend.title=element_text(size=20),
    legend.text=element_text(size=20),
    axis.text.x = element_text(angle = 45, hjust = 1, size=12),
    axis.text.y = element_text(angle = 45, hjust = 1, size=12),
    plot.title = element_text(size = 22, hjust=0.5))
#ggplotly(p2)
p2

```

## T2D

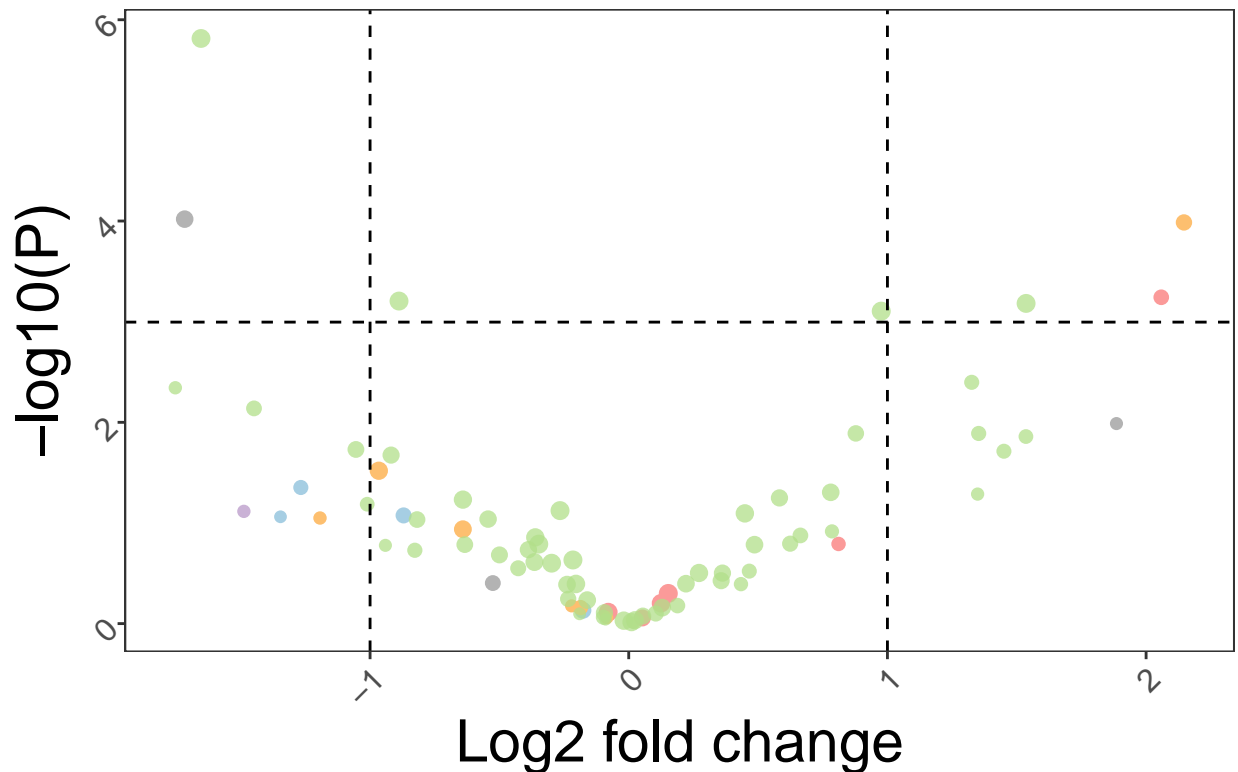

```
Fig2ListRemMet[["vulcLadaT2D"]] <- p2
```

```
p3<-ggplot() +
  geom_point(data=Featurein[which(Featurein$Phyla=="Proteobacteria" &
                                Featurein$compare=="LADA vs Control"), ],
            aes(x=log2FoldChange, y=minuslog10, group=Genus), color="#A6CEE3", shape=16,
            size=Featurein[which(Featurein$Phyla=="Proteobacteria" &
                                Featurein$compare=="LADA vs Control"), ]
            [,ncol(Featurein)]/40+0.5) +
  #did not add jitter to the first on purpose. Sizes are scaled from percent to the range 0.5-3
  geom_point(data=Featureout[which(Featureout$Phyla=="Proteobacteria" &
                                   Featureout$compare=="LADA vs Control"), ],
            aes(x=log2FoldChange, y=minuslog10, group=Genus), color="#A6CEE3", shape=18,
            size=Featureout[which(Featureout$Phyla=="Proteobacteria" &
                                   Featureout$compare=="LADA vs Control"), ]
            [,ncol(Featureout)]/40+0.5) +
  geom_point(data=Featurein[which(Featurein$Phyla=="Bacteroidetes" &
                                   Featurein$compare=="LADA vs Control"), ],
            aes(x=log2FoldChange, y=minuslog10, group=Genus), color="#FB9A99", shape=16,
            size=Featurein[which(Featurein$Phyla=="Bacteroidetes" &
                                   Featurein$compare=="LADA vs Control"), ]
            [,ncol(Featurein)]/40+0.5) +
  geom_jitter(data=Featureout[which(Featureout$Phyla=="Bacteroidetes" &
                                    Featureout$compare=="LADA vs Control"), ],
            aes(x=log2FoldChange, y=minuslog10, group=Genus), color="#FB9A99", shape=18,
```

```

size=Featureout[which(Featureout$Phyla=="Bacteroidetes" &
  Featureout$compare=="LADA vs Control"), ]
[,ncol(Featureout)]/40+0.5, width = 0.1, height = 0.1) +
geom_point(data=Featurein[which(Featurein$Phyla=="Actinobacteria" &
  Featurein$compare=="LADA vs Control"), ],
  aes(x=log2FoldChange, y=minuslog10, group=Genus), color="#FDBF6F", shape=16,
  size=Featurein[which(Featurein$Phyla=="Actinobacteria" &
    Featurein$compare=="LADA vs Control"), ]
    [,ncol(Featurein)]/40+0.5) +
geom_jitter(data=Featureout[which(Featureout$Phyla=="Actinobacteria" &
  Featureout$compare=="LADA vs Control"), ],
  aes(x=log2FoldChange, y=minuslog10, group=Genus), color="#FDBF6F", shape=18,
  size=Featureout[which(Featureout$Phyla=="Actinobacteria" &
    Featureout$compare=="LADA vs Control"), ]
    [,ncol(Featureout)]/40+0.5, width = 0.1, height = 0.1) +
geom_point(data=Featurein[which(Featurein$Phyla=="Firmicutes" &
  Featurein$compare=="LADA vs Control"), ],
  aes(x=log2FoldChange, y=minuslog10, group=Genus),
  color="#B2DF8A", shape=16, alpha=0.75,
  size=Featurein[which(Featurein$Phyla=="Firmicutes" &
    Featurein$compare=="LADA vs Control"), ]
    [,ncol(Featurein)]/40+0.5) +
geom_jitter(data=Featureout[which(Featureout$Phyla=="Firmicutes" &
  Featureout$compare=="LADA vs Control"), ],
  aes(x=log2FoldChange, y=minuslog10, group=Genus),
  color="#B2DF8A", shape=18,
  size=Featureout[which(Featureout$Phyla=="Firmicutes" &
    Featureout$compare=="LADA vs Control"), ]
    [,ncol(Featureout)]/40+0.5, width = 0.1, height = 0.1) +
geom_point(data=Featurein[which(Featurein$Phyla=="Euryarchaeota" &
  Featurein$compare=="LADA vs Control"), ],
  aes(x=log2FoldChange, y=minuslog10, group=Genus), color="#CAB2D6", shape=16,
  size=Featurein[which(Featurein$Phyla=="Euryarchaeota" &
    Featurein$compare=="LADA vs Control"), ]
    [,ncol(Featurein)]/40+0.5) +
geom_jitter(data=Featureout[which(Featureout$Phyla=="Euryarchaeota" &
  Featureout$compare=="LADA vs Control"), ],
  aes(x=log2FoldChange, y=minuslog10, group=Genus), color="#CAB2D6", shape=18,
  size=Featureout[which(Featureout$Phyla=="Euryarchaeota" &
    Featureout$compare=="LADA vs Control"), ]
    [,ncol(Featureout)]/40+0.5, width = 0.1, height = 0.1) +
geom_point(data=Featurein[which(Featurein$Phyla=="Other" &
  Featurein$compare=="LADA vs Control"), ],
  aes(x=log2FoldChange, y=minuslog10, group=Genus), color="#B3B3B3", shape=16,
  size=Featurein[which(Featurein$Phyla=="Other" &
    Featurein$compare=="LADA vs Control"), ]
    [,ncol(Featurein)]/40+0.5) +
geom_jitter(data=Featureout[which(Featureout$Phyla=="Other" &
  Featureout$compare=="LADA vs Control"), ],
  aes(x=log2FoldChange, y=minuslog10, group=Genus), color="#B3B3B3", shape=18,
  size=Featureout[which(Featureout$Phyla=="Other" &
    Featureout$compare=="LADA vs Control"), ]
    [,ncol(Featureout)]/40+0.5, width = 0.1, height = 0.1) +

```

```

geom_text(data=Featurein[which(Featurein$padj<padj_threshold &
                             Featurein$compare=="LADA vs Control"), ],
          aes(x=log2FoldChange, y=minuslog10, group=Genus, label=Genus),
          nudge_y = 0.2, size=2.5) +
geom_text(data=Featureout[which(Featureout$padj<padj_threshold &
                                Featureout$compare=="LADA vs Control"), ],
          aes(x=log2FoldChange, y=minuslog10, group=Genus, label=Genus),
          nudge_x=0.6, nudge_y = -0.2, size=2.5) +
# geom_text(data=Featureout[which(Featureout$padj<padj_threshold &
#                                Featureout$compare=="LADA vs T1D" &
#                                Featureout$Genus=="Rikenellaceae_RC9_gut_group"), ],
#          aes(x=log2FoldChange, y=minuslog10, group=Genus, label=Genus),
#          nudge_x=1.22, nudge_y = 0) +
geom_hline(yintercept = -log(0.05), linetype="dashed") +
geom_hline(yintercept = -log(BHLadaCon), linetype="dashed", alpha=0.1) +
geom_vline(xintercept = -1, linetype="dashed") +
geom_vline(xintercept = 1, linetype="dashed") +
theme_bw() +
ggtitle("Controls") +
xlab("Log2 fold change") +
ylab("-log10(P)") +
theme(panel.grid.major = element_blank(),
      panel.grid.minor = element_blank(),
      axis.title=element_text(size=22),
      legend.position="bottom",
      legend.title=element_text(size=20),
      legend.text=element_text(size=20),
      axis.text.x = element_text(angle = 45, hjust = 1, size=12),
      axis.text.y = element_text(angle = 45, hjust = 1, size=12),
      plot.title = element_text(size = 22, hjust=0.5))
#ggplotly(p3)
p3

```

## Controls

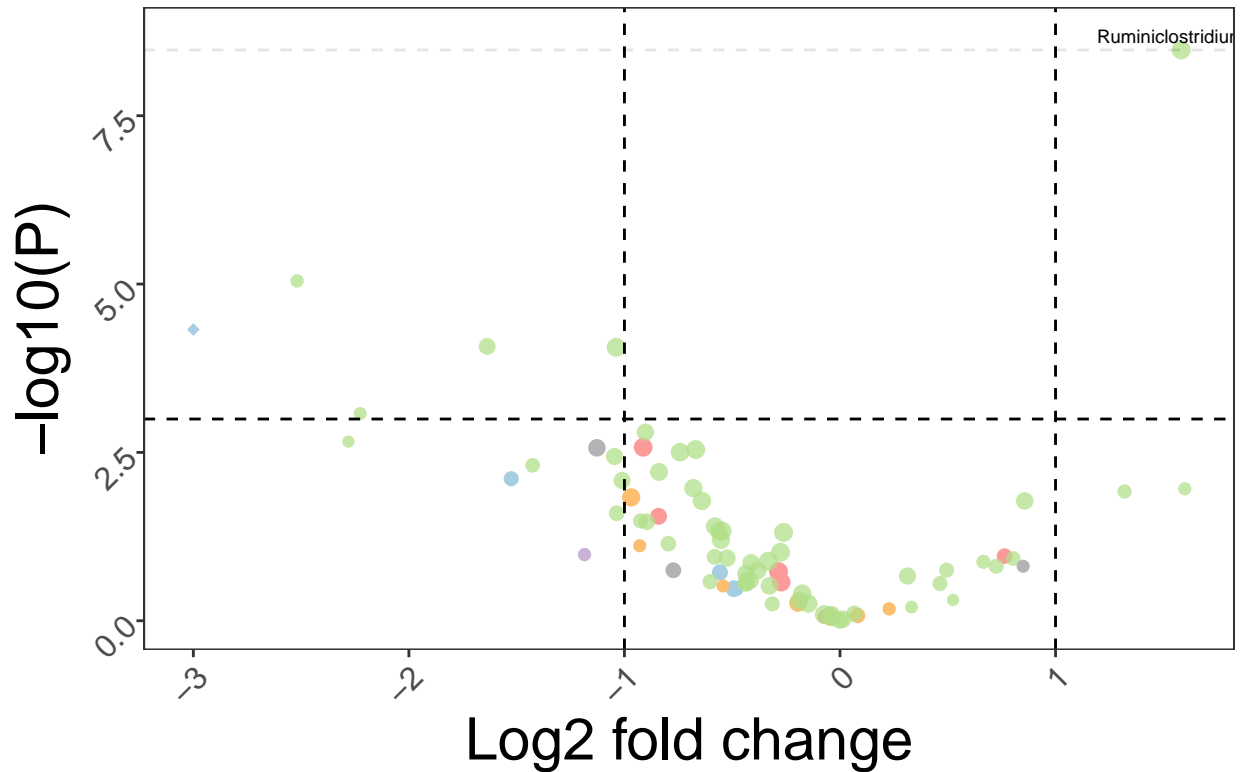

```
Fig2ListRemMet[["vulcLadaControl"]] <- p3
```

```
lay <- rbind(c(1,2,3))
pdf(paste("MicroLADA_VulcanoRemMet.pdf", sep=""), width=15, height=5)
grid.arrange(p1,p2,p3,layout_matrix = lay)
dev.off()
```

pdf 2

```
##Boxplot with stats intertwined
#Stats have to be in the end of the chunk don't ask me why
#Have to use the same naming in res_stat to output tables
res_stat$Genus<-str_replace_all(res_stat$Genus, " ","_")
res_stat$Genus<-str_replace_all(res_stat$Genus, "/" ,"_")
res_stat$Genus<-gsub("\\[|\\]", "", res_stat$Genus)
res_stat$Genus<-str_replace_all(res_stat$Genus, ":" ,"_")
res_stat$Genus<-str_replace_all(res_stat$Genus, "-" ,"_")

#Order Diagnosis
Plotting2$Diagnosis<-ordered(Plotting2$Diagnosis,
                             levels=c("Control", "T1D", "LADA", "T2D"))

for (i in SelOrgs) {
  Boxplot <-
  ggplot(Plotting2, aes_string(x="Diagnosis", y=i, group="Diagnosis")) +
```

```

geom_boxplot() +
#   geom_boxplot(aes(fill=Diagnosis, trim=FALSE)) +
#   geom_jitter() +
geom_jitter(aes(color=Diagnosis), size=2) +
stat_summary(fun.data="mean_sdl",
              mult=1, #mean plus minus a constant (mult=1) times the st.dev
              geom="pointrange",
              width=0.2 ) +
#stat_summary(fun.y = mean, geom = "point") +
#facet_grid(. ~ Metformin, scales="fixed") + #Scales can also be "free"
ggtitle(i) +
#xlab("Diagnosis") +
ylab("Cells pr. g feces") +
scale_fill_manual(values=c(Control = "#666666", T1D = "#1F78B4",
                           T2D = "#33A02C", LADA = "#E31A1C")) +
scale_color_manual(values=c(Control = "#666666", T1D = "#1F78B4",
                             T2D = "#33A02C", LADA = "#E31A1C")) +
theme_bw() +
theme(legend.position="none",
      title =element_text(size=18, face='bold'),
      panel.grid.major = element_blank(),
      panel.grid.minor = element_blank(),
      axis.title=element_text(size=16),
      axis.title.x = element_blank(),
      axis.text.x = element_text(angle = 45, hjust = 1, size=14),
      axis.text.y = element_text(angle = 45, hjust = 1, size=12))
Fig2ListRemMet[[i]] <- Boxplot
#print(kable(stat_sig[which(stat_sig$gene==i), c(5,6,7,10)]))
cat("\n")
tabling<-res_stat[which(res_stat$Genus==i), c(5,6,7,10)]
print(kable(tabling))
#print(tabling)
cat("\n")
print(Boxplot)
}

```

|     | pvalue    | padj      | Genus               | compare         |
|-----|-----------|-----------|---------------------|-----------------|
| 211 | 0.0002082 | 0.0168647 | Ruminiclostridium_5 | LADA vs Control |
| 130 | 0.0645651 | 0.3639375 | Ruminiclostridium_5 | Control vs T2D  |
| 373 | 0.0139925 | 0.4424407 | Ruminiclostridium_5 | LADA vs T1D     |
| 454 | 0.0448406 | 0.5188697 | Ruminiclostridium_5 | LADA vs T2D     |
| 49  | 0.1434284 | 0.7164741 | Ruminiclostridium_5 | Control vs T1D  |
| 292 | 0.6521545 | 0.8253830 | Ruminiclostridium_5 | T1D vs T2D      |

# Ruminiclostridium\_5

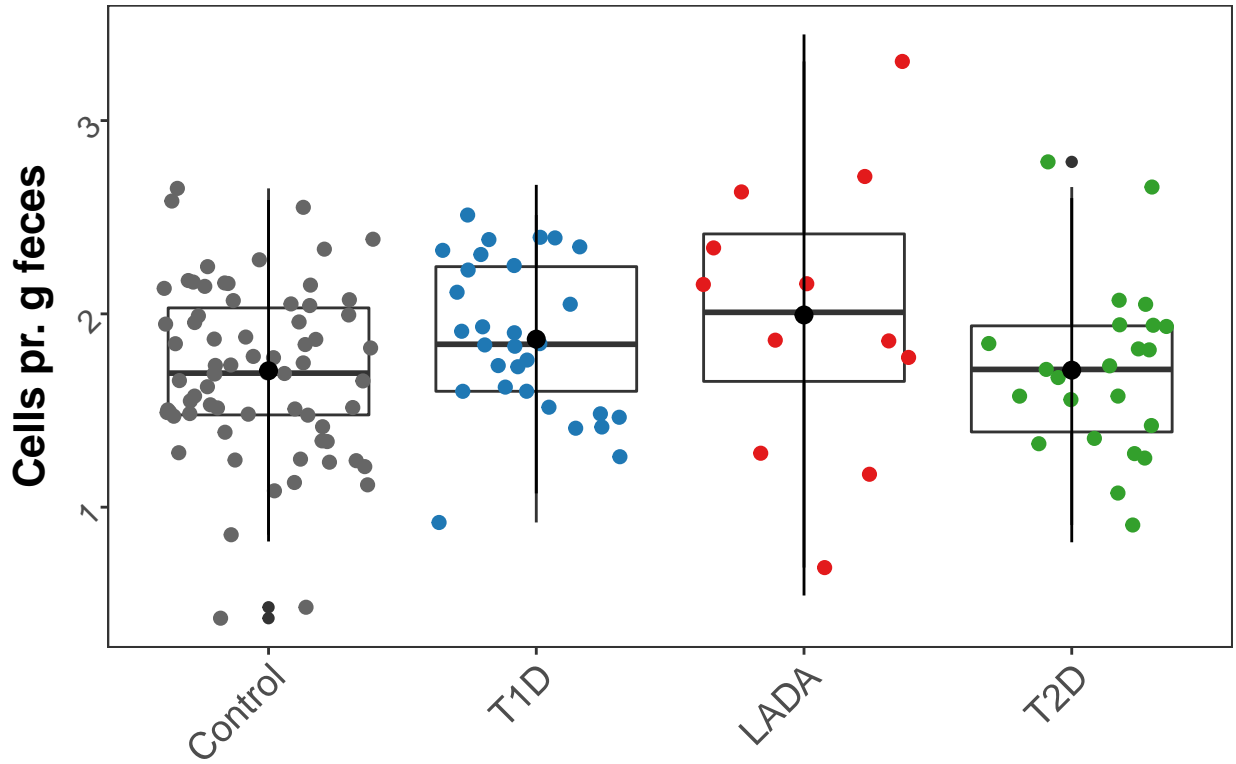

|     | pvalue    | padj      | Genus            | compare         |
|-----|-----------|-----------|------------------|-----------------|
| 44  | 0.0003766 | 0.0229456 | Faecalibacterium | Control vs T1D  |
| 125 | 0.1010235 | 0.4306792 | Faecalibacterium | Control vs T2D  |
| 287 | 0.1682765 | 0.4396901 | Faecalibacterium | T1D vs T2D      |
| 206 | 0.0817890 | 0.5431438 | Faecalibacterium | LADA vs Control |
| 368 | 0.4965938 | 0.8558319 | Faecalibacterium | LADA vs T1D     |
| 449 | 0.6743478 | 0.9476449 | Faecalibacterium | LADA vs T2D     |



# Faecalibacterium

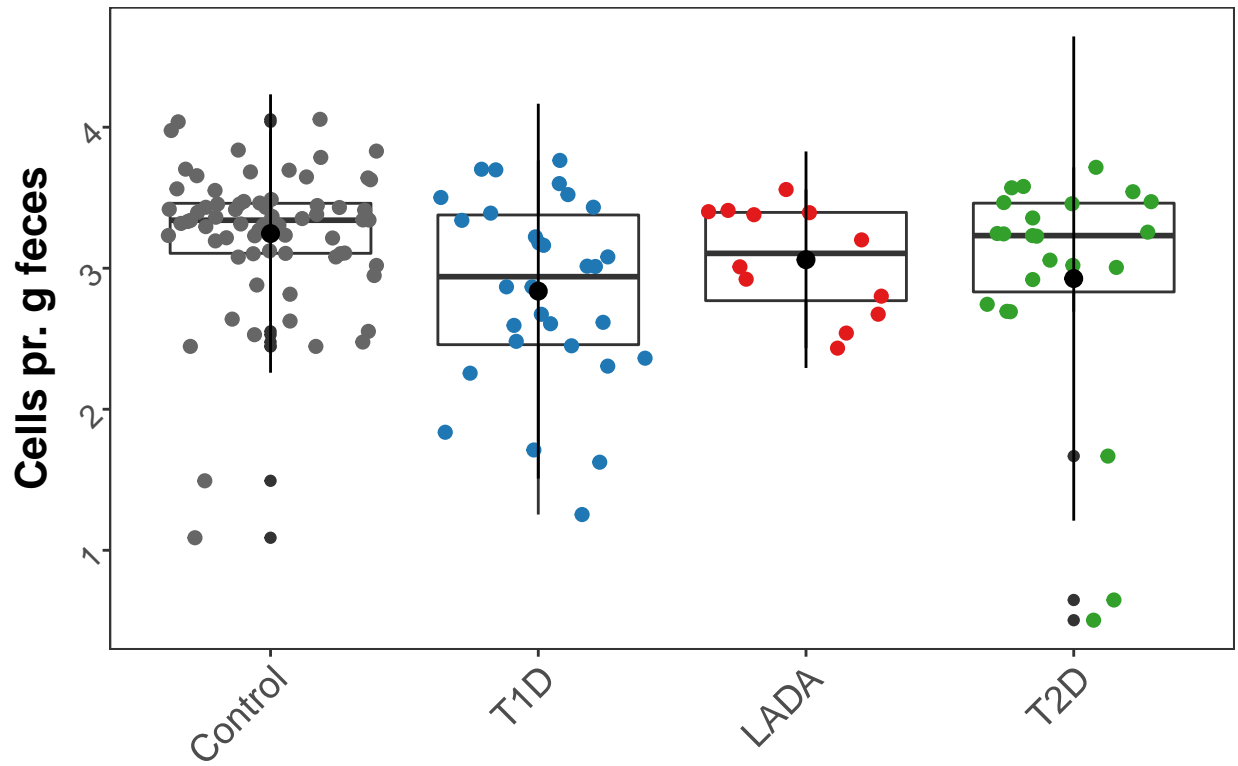

|     | pvalue    | padj      | Genus     | compare         |
|-----|-----------|-----------|-----------|-----------------|
| 39  | 0.0005666 | 0.0229456 | Roseburia | Control vs T1D  |
| 282 | 0.0903121 | 0.3670206 | Roseburia | T1D vs T2D      |
| 120 | 0.2392542 | 0.5699879 | Roseburia | Control vs T2D  |
| 201 | 0.1096977 | 0.5923676 | Roseburia | LADA vs Control |
| 363 | 0.4597352 | 0.8095337 | Roseburia | LADA vs T1D     |
| 444 | 0.5424231 | 0.9258315 | Roseburia | LADA vs T2D     |

# Roseburia

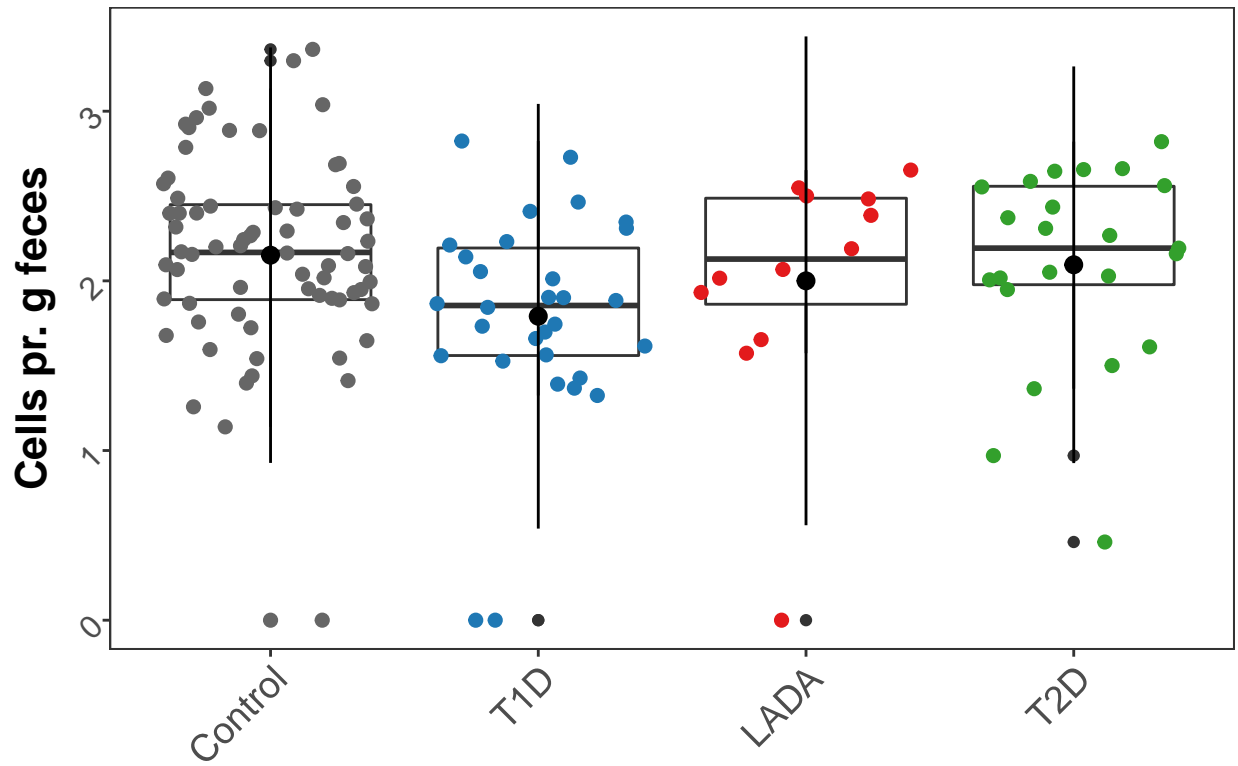

|     | pvalue    | padj      | Genus                   | compare         |
|-----|-----------|-----------|-------------------------|-----------------|
| 251 | 0.0002881 | 0.0233365 | Family.Eggerthellaceae. | T1D vs T2D      |
| 89  | 0.0003640 | 0.0294830 | Family.Eggerthellaceae. | Control vs T2D  |
| 413 | 0.0185763 | 0.5015598 | Family.Eggerthellaceae. | LADA vs T2D     |
| 8   | 0.4977436 | 0.8157710 | Family.Eggerthellaceae. | Control vs T1D  |
| 332 | 0.6250607 | 0.8863868 | Family.Eggerthellaceae. | LADA vs T1D     |
| 170 | 0.9516212 | 0.9859781 | Family.Eggerthellaceae. | LADA vs Control |

# Family.Eggerthellaceae.

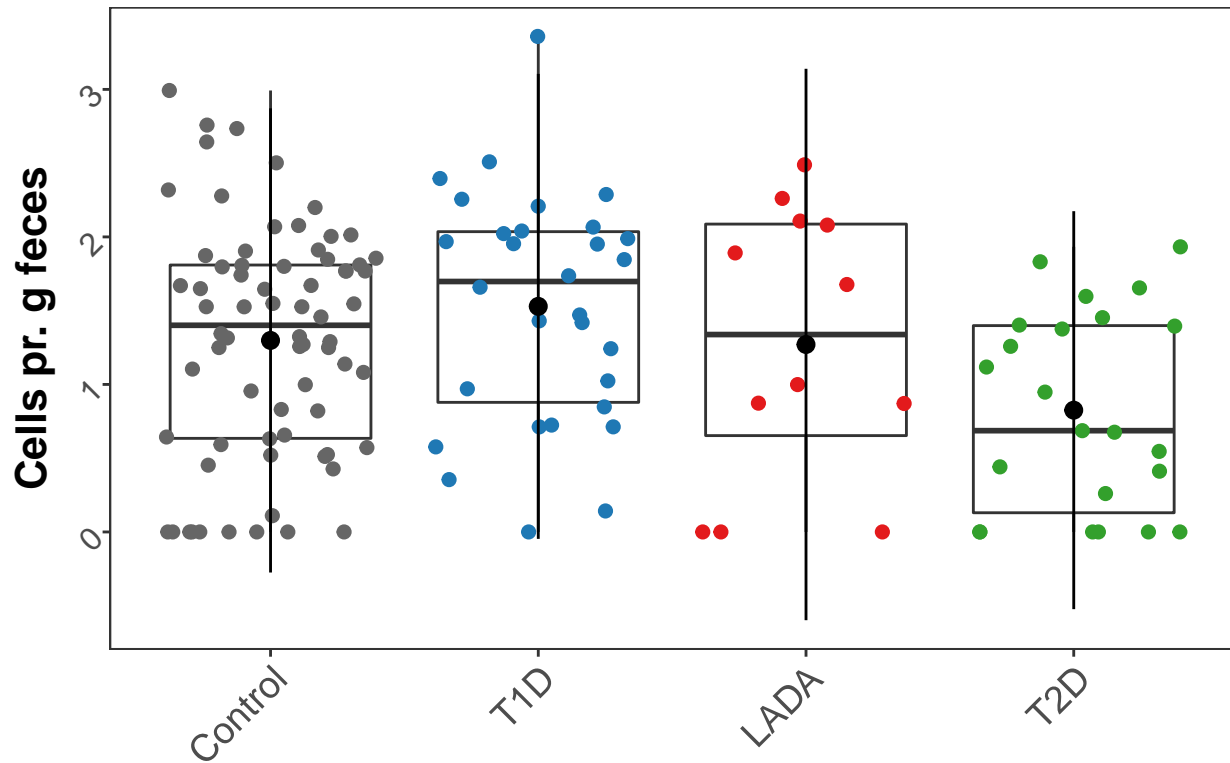

|     | pvalue    | padj      | Genus             | compare         |
|-----|-----------|-----------|-------------------|-----------------|
| 274 | 0.0008905 | 0.0360666 | Lachnoclostridium | T1D vs T2D      |
| 112 | 0.0032266 | 0.0871181 | Lachnoclostridium | Control vs T2D  |
| 436 | 0.0029853 | 0.2418090 | Lachnoclostridium | LADA vs T2D     |
| 193 | 0.2631768 | 0.7036590 | Lachnoclostridium | LADA vs Control |
| 31  | 0.3288067 | 0.7565178 | Lachnoclostridium | Control vs T1D  |
| 355 | 0.6894119 | 0.8863868 | Lachnoclostridium | LADA vs T1D     |

# Lachnoclostridium

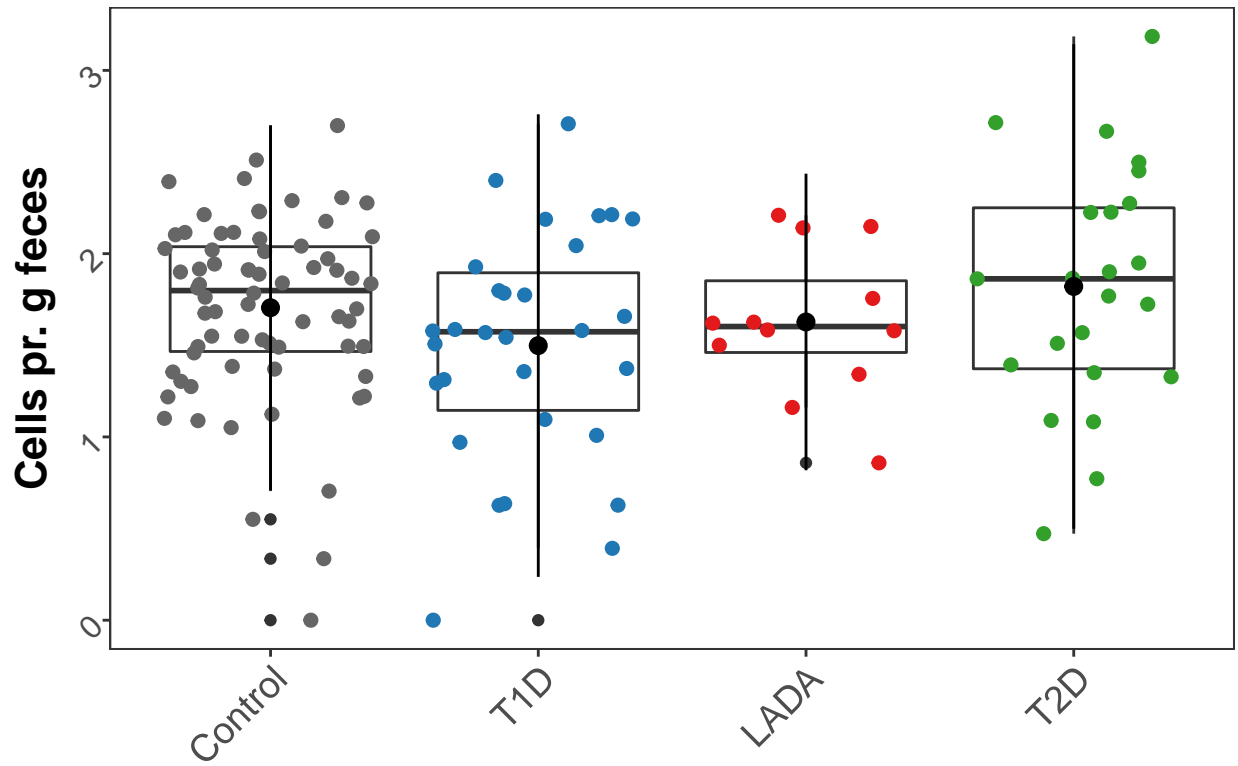

|     | pvalue    | padj      | Genus         | compare         |
|-----|-----------|-----------|---------------|-----------------|
| 259 | 0.0013428 | 0.0362547 | Streptococcus | T1D vs T2D      |
| 97  | 0.0015612 | 0.0632280 | Streptococcus | Control vs T2D  |
| 421 | 0.0415266 | 0.5188697 | Streptococcus | LADA vs T2D     |
| 16  | 0.5560186 | 0.8497642 | Streptococcus | Control vs T1D  |
| 340 | 0.6332724 | 0.8863868 | Streptococcus | LADA vs T1D     |
| 178 | 0.9121030 | 0.9859781 | Streptococcus | LADA vs Control |

# Streptococcus

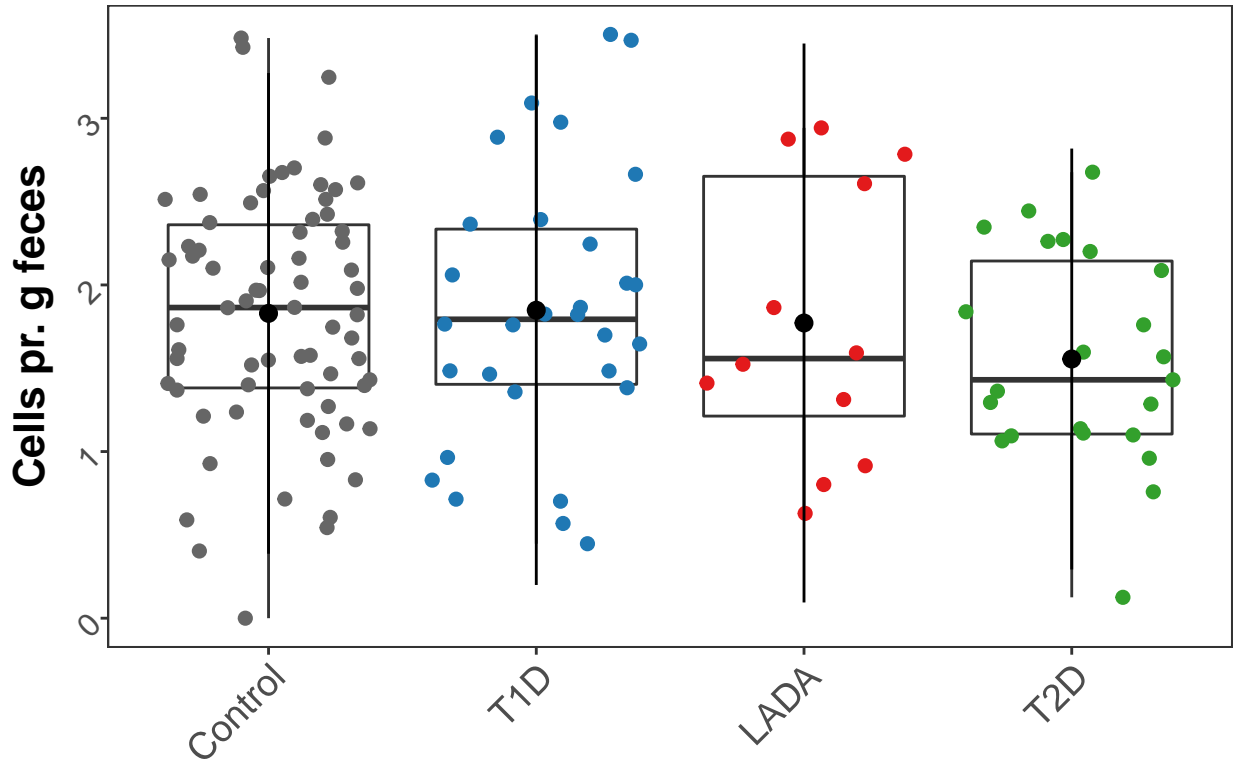

|     | pvalue    | padj      | Genus          | compare         |
|-----|-----------|-----------|----------------|-----------------|
| 286 | 0.0020208 | 0.0409217 | Butyricicoccus | T1D vs T2D      |
| 43  | 0.0019618 | 0.0529689 | Butyricicoccus | Control vs T1D  |
| 448 | 0.0405686 | 0.5188697 | Butyricicoccus | LADA vs T2D     |
| 205 | 0.0787013 | 0.5431438 | Butyricicoccus | LADA vs Control |
| 124 | 0.4541684 | 0.7827157 | Butyricicoccus | Control vs T2D  |
| 367 | 0.7114996 | 0.9004917 | Butyricicoccus | LADA vs T1D     |

# Butyricicoccus

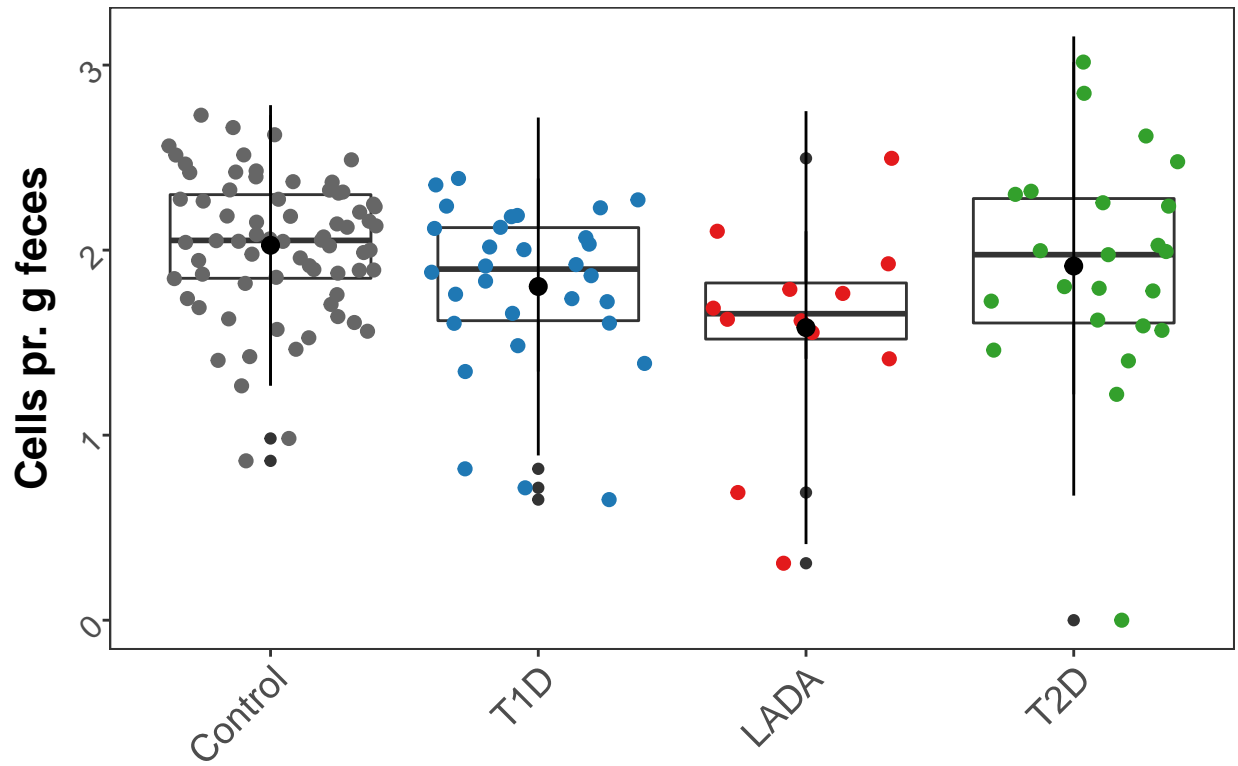

|     | pvalue    | padj      | Genus               | compare         |
|-----|-----------|-----------|---------------------|-----------------|
| 293 | 0.0037534 | 0.0608047 | Ruminiclostridium_6 | T1D vs T2D      |
| 131 | 0.0182794 | 0.2467725 | Ruminiclostridium_6 | Control vs T2D  |
| 374 | 0.0725195 | 0.5124954 | Ruminiclostridium_6 | LADA vs T1D     |
| 212 | 0.2270654 | 0.6895088 | Ruminiclostridium_6 | LADA vs Control |
| 50  | 0.2794684 | 0.7452221 | Ruminiclostridium_6 | Control vs T1D  |
| 455 | 0.5937090 | 0.9430646 | Ruminiclostridium_6 | LADA vs T2D     |

# Ruminiclostridium\_6

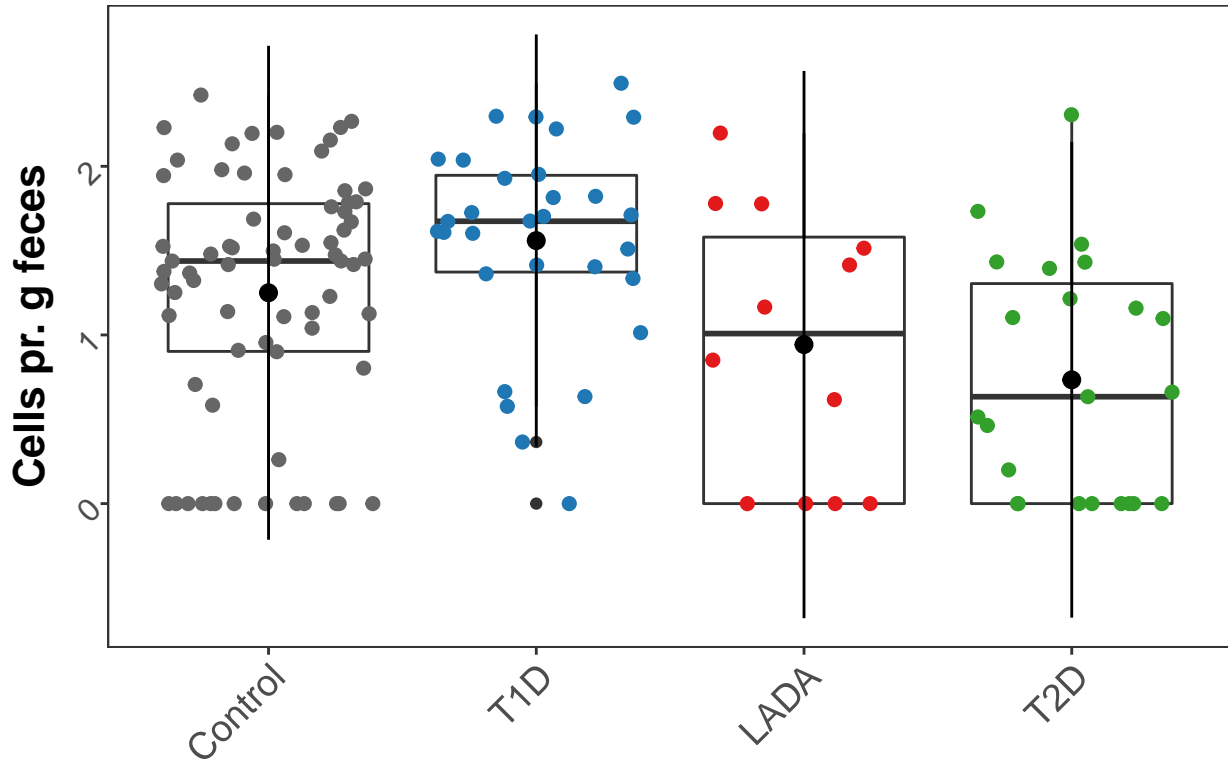

|     | pvalue    | padj      | Genus        | compare         |
|-----|-----------|-----------|--------------|-----------------|
| 21  | 0.0032414 | 0.0656392 | Agathobacter | Control vs T1D  |
| 102 | 0.1166599 | 0.4324500 | Agathobacter | Control vs T2D  |
| 264 | 0.3383977 | 0.5710462 | Agathobacter | T1D vs T2D      |
| 183 | 0.2462135 | 0.7036590 | Agathobacter | LADA vs Control |
| 345 | 0.4121693 | 0.7764118 | Agathobacter | LADA vs T1D     |
| 426 | 0.9668870 | 0.9907084 | Agathobacter | LADA vs T2D     |

# Agathobacter

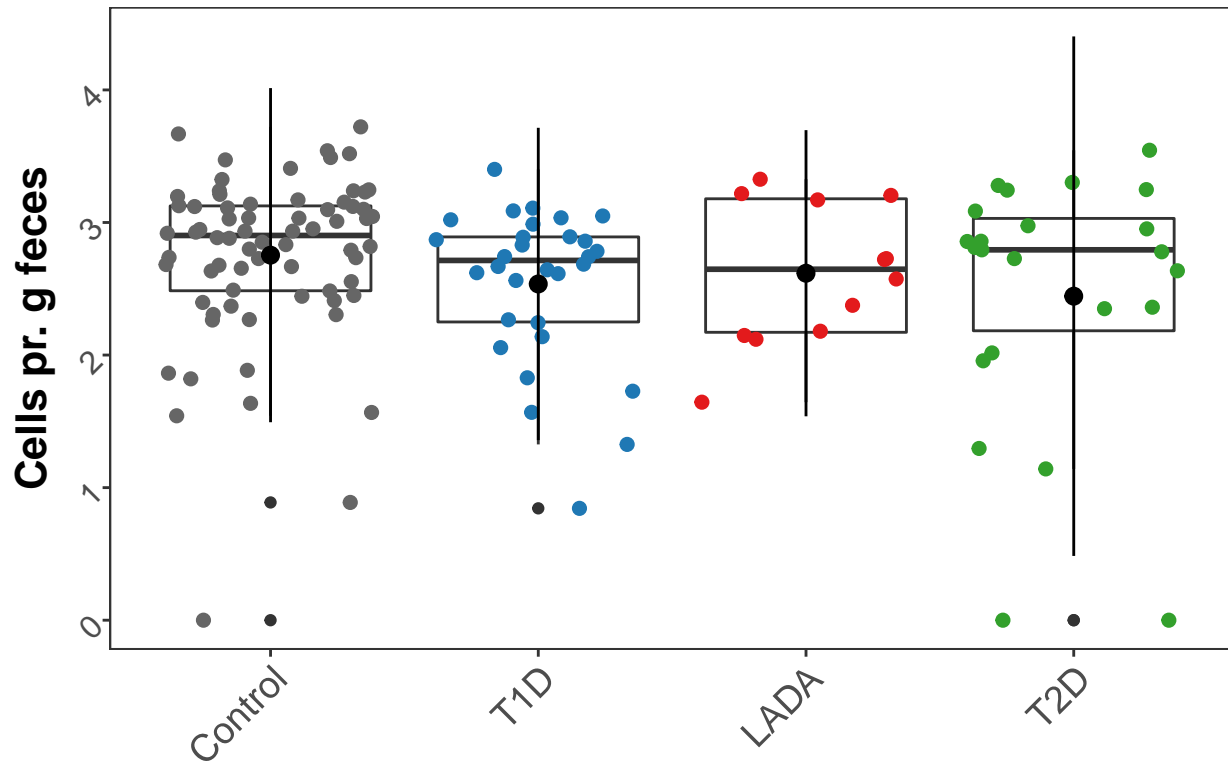

|     | pvalue    | padj      | Genus        | compare         |
|-----|-----------|-----------|--------------|-----------------|
| 184 | 0.0172346 | 0.2792008 | Anaerostipes | LADA vs Control |
| 103 | 0.0272824 | 0.3156961 | Anaerostipes | Control vs T2D  |
| 265 | 0.0929974 | 0.3670206 | Anaerostipes | T1D vs T2D      |
| 346 | 0.0467761 | 0.4736077 | Anaerostipes | LADA vs T1D     |
| 22  | 0.7657369 | 0.8888340 | Anaerostipes | Control vs T1D  |
| 427 | 0.5486409 | 0.9258315 | Anaerostipes | LADA vs T2D     |



# Anaerostipes

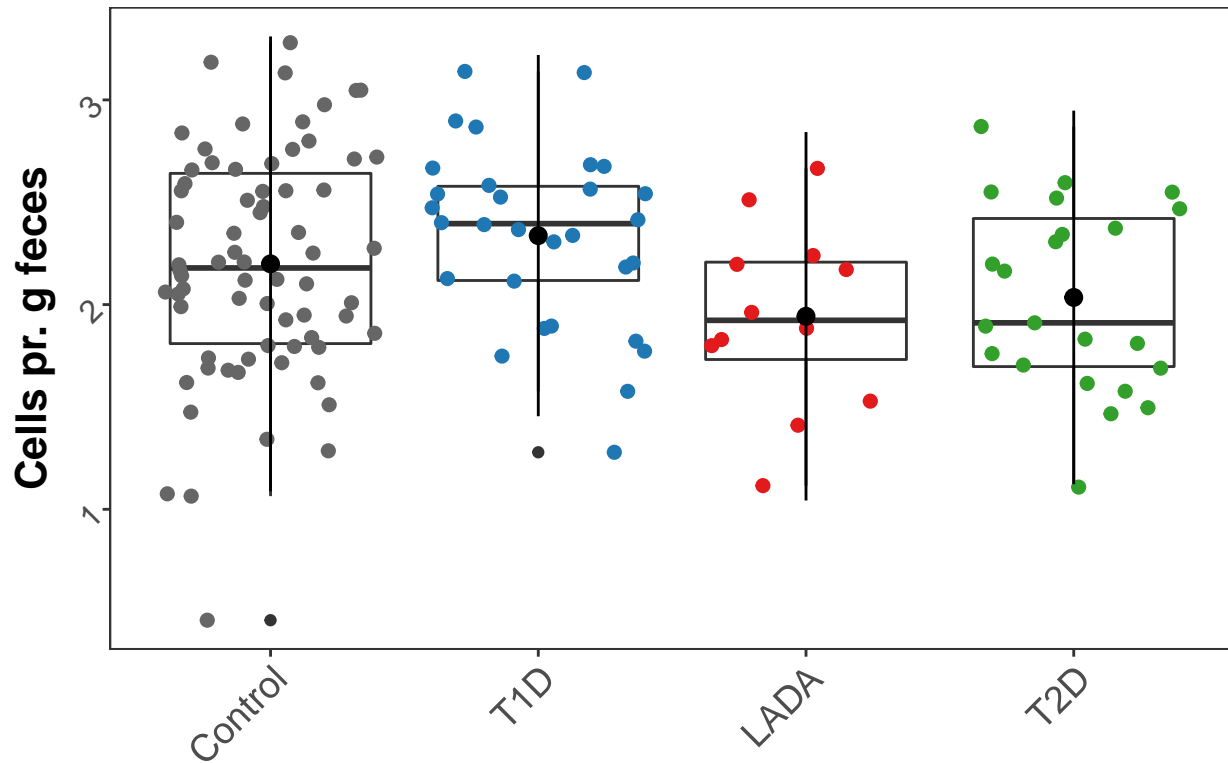

|     | pvalue    | padj      | Genus           | compare         |
|-----|-----------|-----------|-----------------|-----------------|
| 326 | 0.1472882 | 0.5612109 | Bifidobacterium | LADA vs T1D     |
| 164 | 0.1600587 | 0.5939870 | Bifidobacterium | LADA vs Control |
| 407 | 0.2189681 | 0.8863523 | Bifidobacterium | LADA vs T2D     |
| 2   | 0.7973036 | 0.9018955 | Bifidobacterium | Control vs T1D  |
| 245 | 0.8363869 | 0.9155046 | Bifidobacterium | T1D vs T2D      |
| 83  | 0.9960518 | 0.9960518 | Bifidobacterium | Control vs T2D  |

# Bifidobacterium

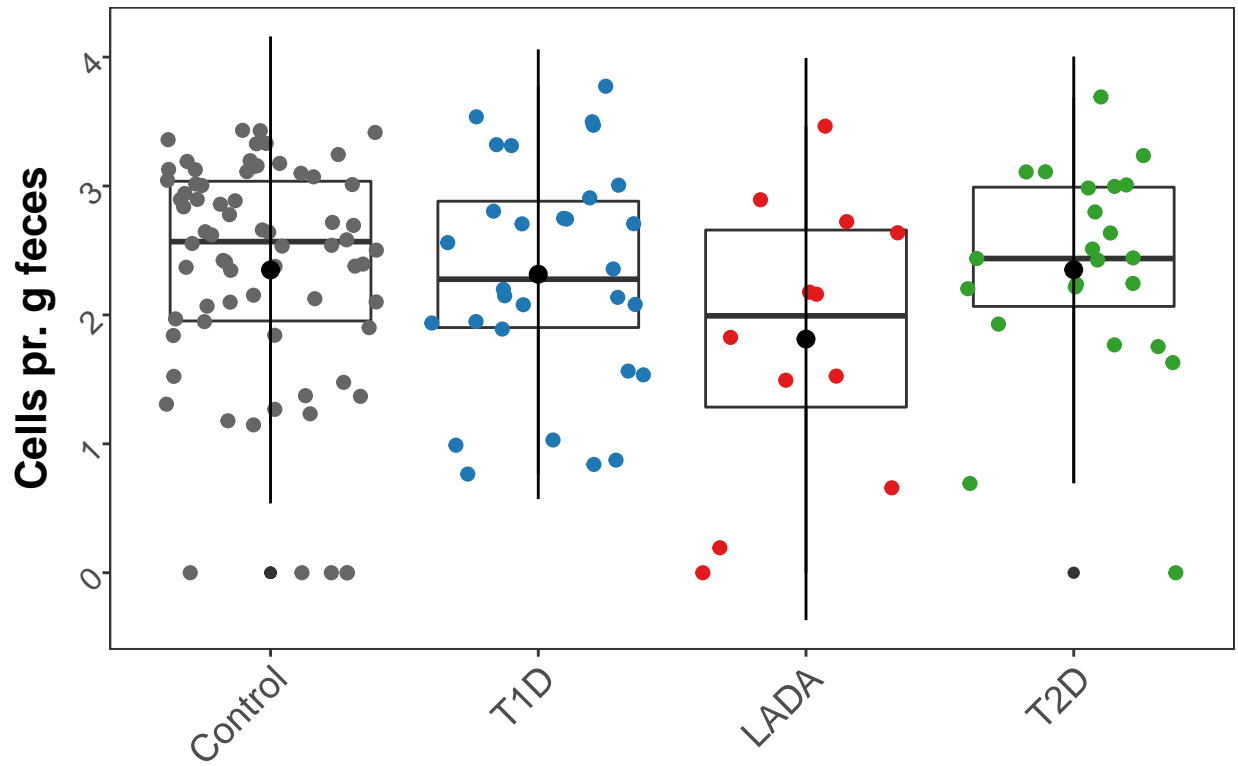

|     | pvalue    | padj      | Genus       | compare         |
|-----|-----------|-----------|-------------|-----------------|
| 323 | 0.1621756 | 0.4378741 | Akkermansia | T1D vs T2D      |
| 404 | 0.1139397 | 0.5127287 | Akkermansia | LADA vs T1D     |
| 80  | 0.1482708 | 0.7164741 | Akkermansia | Control vs T1D  |
| 242 | 0.4725144 | 0.7861343 | Akkermansia | LADA vs Control |
| 161 | 0.7647309 | 0.8675353 | Akkermansia | Control vs T2D  |
| 485 | 0.6684168 | 0.9476449 | Akkermansia | LADA vs T2D     |

# Akkermansia

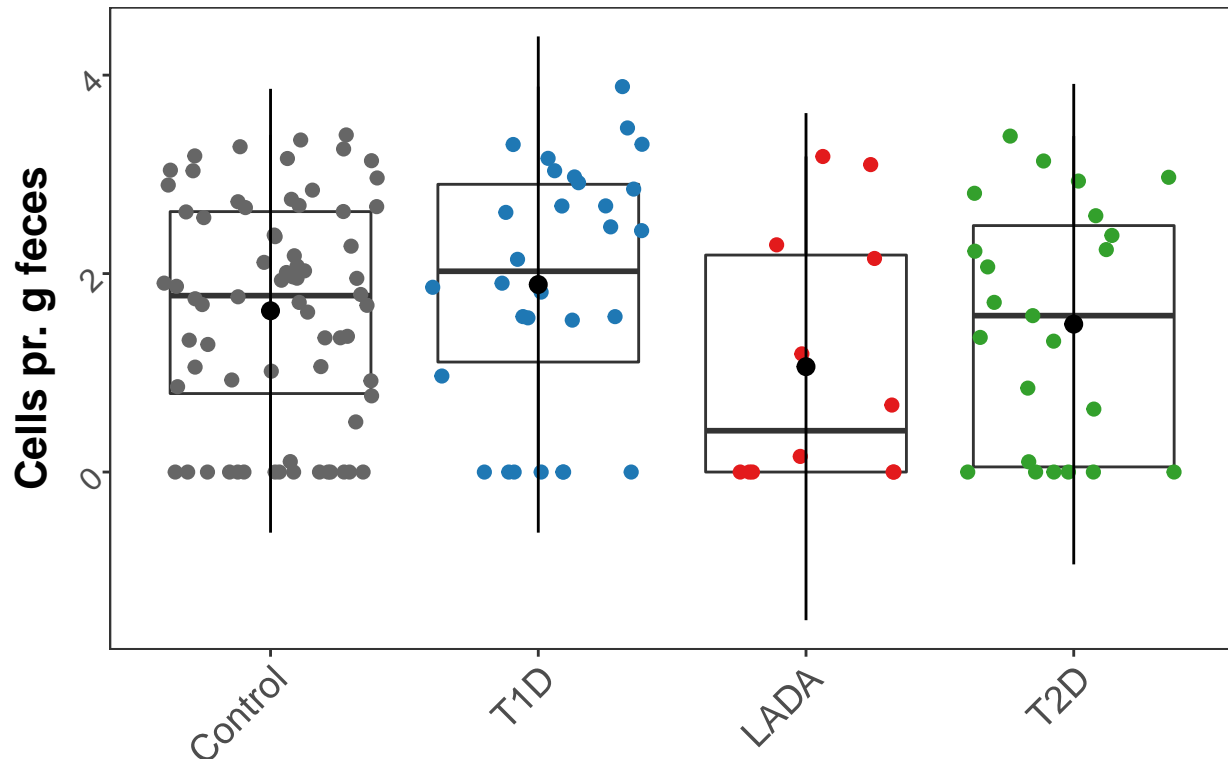

```
lay <- rbind(c(1,2,3))
pdf(paste("MicroLADA_GeneraDARemMet.pdf", sep=""), width=15, height=5)
grid.arrange(Fig2ListRemMet$Faecalibacterium,
              Fig2ListRemMet$Roseburia,
              Fig2ListRemMet$Butyricicoccus, layout_matrix = lay)
dev.off()
```

pdf 2

```
#ggplot(Plotting2, aes(x=BMI, y=Actinomyces)) +
# geom_point()
```

## Create figure 2

Investigating grouping diagnosis. Which group does LADA resemble the most and which are different from each other.

LADA is the reference in the vulcano plots.

```
#Have the plots stored in list
lay <- rbind(c(1,2,3),
             c(4,5,6))

pdf(paste("MicroLADA_Figure2.pdf", sep=""), width=15, height=10)
```

```

grid.arrange(Fig2List$vulcLadaT1D,
              Fig2List$vulcLadaT2D,
              Fig2List$vulcLadaControl,
              Fig2List$Faecalibacterium,
              Fig2List$Roseburia,
              Fig2List$Butyricicoccus,layout_matrix = lay)
dev.off()

```

```

## pdf
## 2

```

```

pdf(paste("MicroLADA_Figure2RemMet.pdf", sep=""), width=15, height=10)
grid.arrange(Fig2ListRemMet$vulcLadaT1D,
              Fig2ListRemMet$vulcLadaT2D,
              Fig2ListRemMet$vulcLadaControl,
              Fig2ListRemMet$Faecalibacterium,
              Fig2ListRemMet$Roseburia,
              Fig2ListRemMet$Butyricicoccus,layout_matrix = lay)
dev.off()

```

```

## pdf
## 2

```

## DESeq heatmap

### Figure 3

Many models to be included so all validation plots are removed. Includes both LRT and Wald  
 Structured to be compatible with creating af heatmap. Includes a dataframe of log2-fold changes a dataframe  
 of padj and afterwards creating a dataframe containing symbols for significance levels. Density plot based  
 on the log2-fold changes.

The first group is the reference for the DESeq tests depicted in the heatmaps

```

rm(list=setdiff(ls(), c("Metadata", "MetadataMed", "Feature", "TaxonomyDA", "Taxonomy")))

#Reassign names
Metadata2<-Metadata
Taxonomy2<-TaxonomyDA

#The factor can not be ordered for DESeq to run
Metadata2$Diagnosis<-factor(Metadata2$Diagnosis, ordered=FALSE)
##Other
#Metadata2$BMIq<-factor(Metadata2$BMIq)

##LRT none
#Create design formula
design <- formula(paste("~ ", "Diagnosis"))
#Create DESeq2 object with matrix and metadata
dds <- DESeqDataSetFromMatrix(countData = Taxonomy2,
                              colData = Metadata2,
                              design = design)

```

```

##Assess and calculate size factors using the different methods
SF<-data.frame(Ratio=sizeFactors(estimateSizeFactors(dds, type="ratio")),
               Poscounts=sizeFactors(estimateSizeFactors(dds, type="poscounts")),
               Iterate=sizeFactors(estimateSizeFactors(dds, type="poscounts")),
               #"iterate" takes a lot of time changed to "poscounts" but kept due to the
               #following code
               Relative=colSums(Taxonomy2)/mean(colSums(Taxonomy2))
               )
SF<-add_rownames(SF, var="MicrobiomeID")
#Adding total abundances
path <- paste("J:/",
              "CBMR/",
              "SUN-CBMR-Hansen-Group/",
              "Projects/",
              "LADA/",
              "LADA_Sandra_Evelina/",
              "LADA_JKV/",
              "LADA_R_AfterFlow_Analysis_FinalCounts/",
              "LADA_FinalCounts/",
              "2019-09-03_CountAnalysis.rds", sep="")
TotalCounts<-readRDS(path)
TotalCountsProcess <-
  data.frame(MicrobiomeID=TotalCounts$DF_Save_w$ID,
             CellNorm=TotalCounts$DF_Save_w$Cells_per_g_feces_FR_corrected_mean)
TotalCountsProcess$MicrobiomeID <- paste("L", TotalCountsProcess$MicrobiomeID,
                                         sep="")
SF2<-merge(SF, TotalCountsProcess, by="MicrobiomeID")

#One value is NaN in sample 602059 assigns value as average
SF2$CellNorm[is.nan(SF2$CellNorm)]<-mean(na.omit(SF2$CellNorm))
SF2$CellNormStand<-SF2$CellNorm/mean(SF2$CellNorm) #Watch out for NaN values can assign
#average, but wants the error

SF3<-merge(Metadata2, SF2, by="MicrobiomeID")
#DESeq divides with sizeFactor (High cell count should have low sizeFactor providing
#larger counts in a sample)
#Still have to consider seq data is relative
SF3$NormRelCell<-SF3$Relative/SF3$CellNormStand

##Select size factors calculated above for normalization
dds@colData@listData$sizeFactor <- SF3[,20]
#hist(dds@colData@listData$sizeFactor)
#colnames(SF3[13])
normname<-colnames(SF3[20])

##See vignette for note on factor levels
#Filtering of the Counttable. Bare minimum is performed later. Also to reduce memory of
#the dds
dds2 <- dds[ rowSums(counts(dds))>50*length(Taxonomy2),] #Previously 0 instead of 1

#Estimate dispersions and fit the GLM
dds2 <- DESeq(dds2, test="LRT", reduced = ~1)

res<-results(dds2)

```

```
summary(res)
```

```
##  
## out of 82 with nonzero total read count  
## adjusted p-value < 0.1  
## LFC > 0 (up)      : 6, 7.3%  
## LFC < 0 (down)   : 7, 8.5%  
## outliers [1]     : 0, 0%  
## low counts [2]   : 0, 0%  
## (mean count < 42)  
## [1] see 'cooksCutoff' argument of ?results  
## [2] see 'independentFiltering' argument of ?results
```

```
resultsNames(dds2)
```

```
## [1] "Intercept"          "Diagnosis_T1D_vs_Control"  
## [3] "Diagnosis_LADA_vs_Control" "Diagnosis_T2D_vs_Control"
```

```
#Data structuring
```

```
df <- data.frame(res)  
df <- tibble::rownames_to_column(df, "Genera")  
#After this it is a select and change naming, then merge  
df_log2 <- df %>% select(one_of("Genera", "log2FoldChange")) %>%  
  dplyr::rename("LRT none"="log2FoldChange")  
  
df_padj <- df %>% select(one_of("Genera", "padj")) %>%  
  dplyr::rename("LRT none"="padj")
```

```
##Wald none
```

```
#Create design formula
```

```
design <- formula(paste("~ ", "Diagnosis"))  
#Create DESeq2 object with matrix and metadata  
dds <- DESeqDataSetFromMatrix(countData = Taxonomy2,  
                               colData = Metadata2,  
                               design = design)
```

```
##Select size factors calculated above for normalization
```

```
dds@colData@listData$sizeFactor <- SF3[,20]
```

```
##See vignette for note on factor levels
```

```
#Filtering of the Counttable. Bare minimum is performed later. Also to reduce memory of
```

```
#the dds
```

```
dds <- dds[ rowSums(counts(dds))>(50*length(Taxonomy2)),] #Previously 0 instead of 1
```

```
#Estimate dispersions and fit the GLM
```

```
dds <- DESeq(dds)
```

```
res<-results(dds)
```

```
summary(res)
```

```
##
```

```
## out of 82 with nonzero total read count
```

```
## adjusted p-value < 0.1
```

```
## LFC > 0 (up)      : 2, 2.4%
```

```
## LFC < 0 (down)   : 1, 1.2%
```

```
## outliers [1]     : 0, 0%
```

```
## low counts [2]   : 0, 0%
```

```
## (mean count < 42)
```

```
## [1] see 'cooksCutoff' argument of ?results
```

```
## [2] see 'independentFiltering' argument of ?results
```

```
resultsNames(dds)
```

```
## [1] "Intercept"          "Diagnosis_T1D_vs_Control"
```

```
## [3] "Diagnosis_LADA_vs_Control" "Diagnosis_T2D_vs_Control"
```

```
#Threshold for FDR-adjusted p-values
```

```
padj_threshold <- 0.1
```

```
if (is.factor(colData(dds)[,"Diagnosis"]) == TRUE) {
```

```
#Find all two-wise combinations of levels in chosen test factor
```

```
test <- combn(levels(colData(dds)[,"Diagnosis"]), 2)
```

```
test[,4]<-c("LADA", "T1D") #Want LADA first
```

```
foo = test[1,]
```

```
poo = test[2,]
```

```
#Do DESeq2 analysis on all combinations of levels and save as list
```

```
result <- vector("list",length(foo))
```

```
for (i in 1:length(foo) ) {
```

```
  for (j in 1:length(poo)) {
```

```
    result[i] = results(dds, contrast = c("Diagnosis" ,foo[i], poo[i]))
```

```
  }
```

```
}
```

```
#Produce output tables with significant taxa from each comparison
```

```
res_list <- vector("list",length(foo))
```

```
for (i in 1:length(result) ) {
```

```
  res_stat <- data.frame(result[i])
```

```
  res_stat <- res_stat[is.na(res_stat$pvalue) == FALSE,]
```

```
  stat_sig <- na.omit(res_stat[res_stat$padj < padj_threshold,])
```

```
  res_stat$gene <- rownames(res_stat)
```

```
  res_stat$g1 <- test[1,i]
```

```
  res_stat$g2 <- test[2,i]
```

```
  res_stat$compare <- paste(test[1,i], "vs", test[2,i])
```

```
  res_list[i] <- list(res_stat)
```

```

}

res_stat <- do.call('cbind', res_list)
#rownames(res_stat) <- 1:nrow(res_stat)
#res_stat <- res_stat[with(res_stat, order(padj, pvalue, abs(log2FoldChange))),]
#stat_sig <- na.omit(res_stat[res_stat$padj < padj_threshold,])
}

((res_stat[,7]==res_stat[,17])==res_stat[,27]==res_stat[,37]))==
  ((res_stat[,47]==res_stat[,57]))

```

```

## [1] TRUE TRUE
## [16] TRUE TRUE
## [31] TRUE TRUE
## [46] TRUE TRUE
## [61] TRUE TRUE
## [76] TRUE TRUE TRUE TRUE TRUE TRUE TRUE

```

```

#testordernone<-res_stat[2,c(10,20,30,40,50,60)]
df_log2_merge <- res_stat[,c(7,12,2,22,32,52,42)]
colnames(df_log2_merge)<- c("Genera", "No adj - Control vs. LADA", "No adj - Control vs. T1D",
                          "No adj - Control vs. T2D", "No adj - LADA vs. T1D",
                          "No adj - LADA vs. T2D", "No adj - T1D vs. T2D")
df_log2 <- merge(df_log2, df_log2_merge, by="Genera")

df_padj_merge <- res_stat[,c(7,16,6,26,36,56,46)]
colnames(df_padj_merge)<- c("Genera", "No adj - Control vs. LADA", "No adj - Control vs. T1D",
                          "No adj - Control vs. T2D", "No adj - LADA vs. T1D",
                          "No adj - LADA vs. T2D", "No adj - T1D vs. T2D")
df_padj <- merge(df_padj, df_padj_merge, by="Genera")

```

### ##LRT BMIq

*#Create design formula*

```
design <- formula(paste("~ ", "Diagnosis", "+", "BMIq"))
```

*#Create DESeq2 object with matrix and metadata*

```
dds <- DESeqDataSetFromMatrix(countData = Taxonomy2,
                              colData = Metadata2,
                              design = design)
```

### ##Assess and calculate size factors using the different methods

```
SF<-data.frame(Ratio=sizeFactors(estimateSizeFactors(dds, type="ratio")),
              Poscounts=sizeFactors(estimateSizeFactors(dds, type="poscounts")),
              Iterate=sizeFactors(estimateSizeFactors(dds, type="poscounts")),
              #"iterate" takes a lot of time changed to "poscounts" but kept due to the
              #following code
              Relative=colSums(Taxonomy2)/mean(colSums(Taxonomy2))

```



```

)
SF<-add_rownames(SF, var="MicrobiomeID")
#Adding total abundances
TotalCounts<-readRDS(path)
TotalCountsProcess <-
  data.frame(MicrobiomeID=TotalCounts$DF_Save_w$ID,
             CellNorm=TotalCounts$DF_Save_w$Cells_per_g_feces_FR_corrected_mean)
TotalCountsProcess$MicrobiomeID <- paste("L", TotalCountsProcess$MicrobiomeID,
                                         sep="")
SF2<-merge(SF, TotalCountsProcess, by="MicrobiomeID")

#One value is NaN in sample 602059 assigns value as average
SF2$CellNorm[is.nan(SF2$CellNorm)]<-mean(na.omit(SF2$CellNorm))
SF2$CellNormStand<-SF2$CellNorm/mean(SF2$CellNorm) #Watch out for NaN values can assign
#average, but wants the error

SF3<-merge(Metadata2, SF2, by="MicrobiomeID")
#DESeq divides with sizeFactor (High cell count should have low sizeFactor providing
#larger counts in a sample)
#Still have to consider seq data is relative
SF3$NormRelCell<-SF3$Relative/SF3$CellNormStand

##Select size factors calculated above for normalization
dds@colData@listData$sizeFactor <- SF3[,20]
#hist(dds@colData@listData$sizeFactor)
#colnames(SF3[13])
normname<-colnames(SF3[20])

##See vignette for note on factor levels
#Filtering of the Counttable. Bare minimum is performed later. Also to reduce memory of
#the dds
dds2 <- dds[ rowSums(counts(dds))>50*length(Taxonomy2),] #Previously 0 instead of 1

#Estimate dispersions and fit the GLM
dds2 <- DESeq(dds2, test="LRT", reduced = ~BMIq)

res<-results(dds2)
summary(res)

##
## out of 82 with nonzero total read count
## adjusted p-value < 0.1
## LFC > 0 (up)      : 5, 6.1%
## LFC < 0 (down)   : 6, 7.3%
## outliers [1]     : 0, 0%
## low counts [2]   : 0, 0%
## (mean count < 49)
## [1] see 'cooksCutoff' argument of ?results
## [2] see 'independentFiltering' argument of ?results

resultsNames(dds2)

## [1] "Intercept"          "Diagnosis_T1D_vs_Control"
## [3] "Diagnosis_LADA_vs_Control" "Diagnosis_T2D_vs_Control"

```

```
## [5] "BMIq"
```

```
#Data structuring
df <- data.frame(res)
df <- tibble::rownames_to_column(df, "Genera")
#After this it is a select and change naming, then merge
df_log2_merge <- df %>% select(one_of("Genera", "log2FoldChange")) %>%
  dplyr::rename("LRT BMI"="log2FoldChange")
df_log2 <- merge(df_log2, df_log2_merge, by="Genera")

df_padj_merge <- df %>% select(one_of("Genera", "padj")) %>%
  dplyr::rename("LRT BMI"="padj")
df_padj <- merge(df_padj, df_padj_merge, by="Genera")

##Wald BMI
#Create design formula
design <- formula(paste("~ ", "Diagnosis", "+", "BMIq"))
#Create DESeq2 object with matrix and metadata
dds <- DESeqDataSetFromMatrix(countData = Taxonomy2,
                              colData = Metadata2,
                              design = design)

##Select size factors calculated above for normalization
dds@colData@listData$sizeFactor <- SF3[,20]

##See vignette for note on factor levels
#Filtering of the Counttable. Bare minimum is performed later. Also to reduce memory of

#the dds
dds <- dds[ rowSums(counts(dds))>(50*length(Taxonomy2)),] #Previously 0 instead of 1

#Estimate dispersions and fit the GLM
dds <- DESeq(dds)

res<-results(dds)
summary(res)

##
## out of 82 with nonzero total read count
## adjusted p-value < 0.1
## LFC > 0 (up)      : 2, 2.4%
## LFC < 0 (down)   : 2, 2.4%
## outliers [1]     : 0, 0%
## low counts [2]   : 0, 0%
## (mean count < 49)
## [1] see 'cooksCutoff' argument of ?results
## [2] see 'independentFiltering' argument of ?results
```

```
resultsNames(dds)
```

```
## [1] "Intercept"          "Diagnosis_T1D_vs_Control"  
## [3] "Diagnosis_LADA_vs_Control" "Diagnosis_T2D_vs_Control"  
## [5] "BMIq"
```

```
#Threshold for FDR-adjusted p-values
```

```
padj_threshold <- 0.1
```

```
if (is.factor(colData(dds)[,"Diagnosis"]) == TRUE) {
```

```
#Find all two-wise combinations of levels in chosen test factor
```

```
test <- combn(levels(colData(dds)[,"Diagnosis"]), 2)
```

```
test[,4]<-c("LADA", "T1D") #Want LADA first
```

```
foo = test[1,]
```

```
poo = test[2,]
```

```
#Do DESeq2 analysis on all combinations of levels and save as list
```

```
result <- vector("list",length(foo))
```

```
for (i in 1:length(foo) ) {
```

```
  for (j in 1:length(poo)) {
```

```
    result[i] = results(dds, contrast = c("Diagnosis" ,foo[i], poo[i]))
```

```
  }
```

```
}
```

```
#Produce output tables with significant taxa from each comparison
```

```
res_list <- vector("list",length(foo))
```

```
for (i in 1:length(result) ) {
```

```
  res_stat <- data.frame(result[i])
```

```
  res_stat <- res_stat[is.na(res_stat$pvalue) == FALSE,]
```

```
  stat_sig <- na.omit(res_stat[res_stat$padj < padj_threshold,])
```

```
  res_stat$gene <- rownames(res_stat)
```

```
  res_stat$g1 <- test[1,i]
```

```
  res_stat$g2 <- test[2,i]
```

```
  res_stat$compare <- paste(test[1,i], "vs", test[2,i])
```

```
  res_list[i] <- list(res_stat)
```

```
}
```

```
res_stat <- do.call('cbind', res_list)
```

```
#rownames(res_stat) <- 1:nrow(res_stat)
```

```
#res_stat <- res_stat[with(res_stat, order(padj, pvalue, abs(log2FoldChange))),]
```

```
#stat_sig <- na.omit(res_stat[res_stat$padj < padj_threshold,])
```

```
}
```

```
((res_stat[,7]==res_stat[,17])==res_stat[,27]==res_stat[,37]))==
```

```
((res_stat[,47]==res_stat[,57]))
```

```
## [1] TRUE  
## [16] TRUE  
## [31] TRUE  
## [46] TRUE  
## [61] TRUE  
## [76] TRUE TRUE TRUE TRUE TRUE TRUE TRUE
```

```

#testorderBMI<-res_stat[,c(10,20,30,40,50,60)]
#testordernone==testorderBMI
df_log2_merge <- res_stat[,c(7,12,2,22,32,52,42)]
colnames(df_log2_merge)<- c("Genera", "BMI - Control vs. LADA", "BMI - Control vs. T1D",
                           "BMI - Control vs. T2D", "BMI - LADA vs. T1D",
                           "BMI - LADA vs. T2D", "BMI - T1D vs. T2D")
df_log2 <- merge(df_log2, df_log2_merge, by="Genera")

df_padj_merge <- res_stat[,c(7,16,6,26,36,56,46)]
colnames(df_padj_merge)<- c("Genera", "BMI - Control vs. LADA", "BMI - Control vs. T1D",
                           "BMI - Control vs. T2D", "BMI - LADA vs. T1D",
                           "BMI - LADA vs. T2D", "BMI - T1D vs. T2D")
df_padj <- merge(df_padj, df_padj_merge, by="Genera")

##LRT metformin
#Instead of adding to formula removes them from datasets since it is only present in some
#groups
##Removing treated with metformin
#Metadata$Metformin <- ifelse(is.na(Metadata$Metformin), "Unknow", Metadata$Metformin)
Metadata2<-filter(Metadata, !Metformin == 1)
table(Metadata2$Diagnosis)

##
## Control      T1D      LADA      T2D
##      70       30       12       23

##Applying subsetting to OTU tables
Taxonomy2<-dplyr::select(Taxonomy, one_of(as.character(Metadata2$MicrobiomeID)))
##Reassign names
#Metadata2<-Metadata
Taxonomy2<-Taxonomy2[which(row.names(Taxonomy) %in% row.names(Taxonomy2)), ]

#The factor can not be ordered for DESeq to run
Metadata2$Diagnosis<-factor(Metadata2$Diagnosis, ordered=FALSE)

#Create design formula
design <- formula(paste("~ ", "Diagnosis"))
#design <- formula(paste("~ ", "Diagnosis", "+", "BMIq"))
#Create DESeq2 object with matrix and metadata
dds <- DESeqDataSetFromMatrix(countData = Taxonomy2,
                              colData = Metadata2,
                              design = design)

##Assess and calculate size factors using the different methods
SF<-data.frame(Ratio=sizeFactors(estimateSizeFactors(dds, type="ratio")),
              Poscounts=sizeFactors(estimateSizeFactors(dds, type="poscounts")),

```

```

        Iterate=sizeFactors(estimateSizeFactors(dds, type="poscounts")),
        #"iterate" takes a lot of time changed to "poscounts" but kept due to the
        #following code
        Relative=colSums(Taxonomy2)/mean(colSums(Taxonomy2))
    )
SF<-add_rownames(SF, var="MicrobiomeID")
#Adding total abundances
TotalCounts<-readRDS(path)
TotalCountsProcess <-
  data.frame(MicrobiomeID=TotalCounts$DF_Save_w$ID,
             CellNorm=TotalCounts$DF_Save_w$Cells_per_g_feces_FR_corrected_mean)
TotalCountsProcess$MicrobiomeID <- paste("L", TotalCountsProcess$MicrobiomeID,
                                         sep="")
SF2<-merge(SF, TotalCountsProcess, by="MicrobiomeID")

#One value is NaN in sample 602059 assigns value as average
SF2$CellNorm[is.nan(SF2$CellNorm)]<-mean(na.omit(SF2$CellNorm))
SF2$CellNormStand<-SF2$CellNorm/mean(SF2$CellNorm) #Watch out for NaN values can assign
#average, but wants the error

SF3<-merge(Metadata2, SF2, by="MicrobiomeID")
#DESeq divides with sizeFactor (High cell count should have low sizeFactor providing
#larger counts in a sample)
#Still have to consider seq data is relative
SF3$NormRelCell<-SF3$Relative/SF3$CellNormStand

##Select size factors calculated above for normalization
dds@colData@listData$sizeFactor <- SF3[,20]
#hist(dds@colData@listData$sizeFactor)
#colnames(SF3[13])
normname<-colnames(SF3[20])

##See vignette for note on factor levels
#Filtering of the Counttable. Bare minimum is performed later. Also to reduce memory of
#the dds
dds2 <- dds[ rowSums(counts(dds))>40*length(Taxonomy2),] #Previously 0 instead of 1
#Changed to 40 instead of 50 after subsetting
#Otherwise Actinomyces and Family.Erysi... are removed

#Estimate dispersions and fit the GLM
dds2 <- DESeq(dds2, test="LRT", reduced = ~1)

res<-results(dds2)
summary(res)

##
## out of 84 with nonzero total read count
## adjusted p-value < 0.1
## LFC > 0 (up)      : 3, 3.6%
## LFC < 0 (down)   : 2, 2.4%
## outliers [1]     : 0, 0%
## low counts [2]   : 0, 0%
## (mean count < 41)
## [1] see 'cooksCutoff' argument of ?results

```

```
## [2] see 'independentFiltering' argument of ?results
```

```
resultsNames(dds2)
```

```
## [1] "Intercept" "Diagnosis_T1D_vs_Control"  
## [3] "Diagnosis_LADA_vs_Control" "Diagnosis_T2D_vs_Control"
```

```
#Data structuring
```

```
df <- data.frame(res)
```

```
df <- tibble::rownames_to_column(df, "Genera")
```

```
#After this it is a select and change naming, then merge
```

```
df_log2_merge <- df %>% select(one_of("Genera", "log2FoldChange")) %>%
```

```
  dplyr::rename("LRT Metformin"="log2FoldChange")
```

```
df_log2 <- merge(df_log2, df_log2_merge, by="Genera")
```

```
df_padj_merge <- df %>% select(one_of("Genera", "padj")) %>%
```

```
  dplyr::rename("LRT Metformin"="padj")
```

```
df_padj <- merge(df_padj, df_padj_merge, by="Genera")
```

```
#setdiff(df$Genera, df_log2$Genera)
```

```
##Wald Metformin
```

```
#Create design formula
```

```
design <- formula(paste("~ ", "Diagnosis"))
```

```
#design <- formula(paste("~ ", "Diagnosis", "+", "BMIq"))
```

```
#Create DESeq2 object with matrix and metadata
```

```
dds <- DESeqDataSetFromMatrix(countData = Taxonomy2,
```

```
  colData = Metadata2,
```

```
  design = design)
```

```
##Select size factors calculated above for normalization
```

```
dds@colData@listData$sizeFactor <- SF3[,20]
```

```
##See vignette for note on factor levels
```

```
#Filtering of the Counttable. Bare minimum is performed later. Also to reduce memory of
```

```
#the dds
```

```
dds <- dds[ rowSums(counts(dds))>(40*length(Taxonomy2)),] #Previously 0 instead of 1
```

```
  #Changed to 40 instead of 50 after subsetting
```

```
  #Otherwise Actinomyces and Family.Erysi... are removed
```

```
#Estimate dispersions and fit the GLM
```

```
dds <- DESeq(dds)
```

```
res<-results(dds)
```

```
summary(res)
```

```
##
```

```
## out of 84 with nonzero total read count
```

```

## adjusted p-value < 0.1
## LFC > 0 (up)      : 1, 1.2%
## LFC < 0 (down)   : 2, 2.4%
## outliers [1]     : 0, 0%
## low counts [2]   : 0, 0%
## (mean count < 41)
## [1] see 'cooksCutoff' argument of ?results
## [2] see 'independentFiltering' argument of ?results

resultsNames(dds)

## [1] "Intercept"          "Diagnosis_T1D_vs_Control"
## [3] "Diagnosis_LADA_vs_Control" "Diagnosis_T2D_vs_Control"

#Threshold for FDR-adjusted p-values
padj_threshold <- 0.1

if (is.factor(colData(dds)[,"Diagnosis"]) == TRUE) {

#Find all two-wise combinations of levels in chosen test factor
test <- combn(levels(colData(dds)[,"Diagnosis"]), 2)
test[,4]<-c("LADA", "T1D") #Want LADA first
foo = test[1,]
poo = test[2,]

#Do DESeq2 analysis on all combinations of levels and save as list
result <- vector("list",length(foo))
for (i in 1:length(foo) ) {
  for (j in 1:length(poo)) {
    result[i] = results(dds, contrast = c("Diagnosis" ,foo[i], poo[i]))
  }
}

#Produce output tables with significant taxa from each comparison
res_list <- vector("list",length(foo))
for (i in 1:length(result) ) {
  res_stat <- data.frame(result[i])
  res_stat <- res_stat[is.na(res_stat$pvalue) == FALSE,]
  stat_sig <- na.omit(res_stat[res_stat$padj < padj_threshold,])
  res_stat$gene <- rownames(res_stat)
  res_stat$g1 <- test[1,i]
  res_stat$g2 <- test[2,i]
  res_stat$compare <- paste(test[1,i], "vs", test[2,i])
  res_list[i] <- list(res_stat)
}

res_stat <- do.call('cbind', res_list)
#rownames(res_stat) <- 1:nrow(res_stat)
#res_stat <- res_stat[with(res_stat, order(padj, pvalue, abs(log2FoldChange))),]
#stat_sig <- na.omit(res_stat[res_stat$padj < padj_threshold,])
}

((res_stat[,7]==res_stat[,17])==res_stat[,27]==res_stat[,37]))==
((res_stat[,47]==res_stat[,57]))

```

```

## [1] TRUE TRUE
## [16] TRUE TRUE
## [31] TRUE TRUE
## [46] TRUE TRUE
## [61] TRUE TRUE
## [76] TRUE TRUE TRUE TRUE TRUE TRUE TRUE TRUE TRUE

#testorderMetformin<-res_stat[2,c(10,20,30,40,50,60)]
#testordernone==testorderMetformin
df_log2_merge <- res_stat[,c(7,12,2,22,32,52,42)]
colnames(df_log2_merge)<- c("Genera", "Metformin - Control vs. LADA", "Metformin - Control vs. T1D",
                           "Metformin - Control vs. T2D", "Metformin - LADA vs. T1D",
                           "Metformin - LADA vs. T2D", "Metformin - T1D vs. T2D")
df_log2 <- merge(df_log2, df_log2_merge, by="Genera")

df_padj_merge <- res_stat[,c(7,16,6,26,36,56,46)]
colnames(df_padj_merge)<- c("Genera", "Metformin - Control vs. LADA", "Metformin - Control vs. T1D",
                           "Metformin - Control vs. T2D", "Metformin - LADA vs. T1D",
                           "Metformin - LADA vs. T2D", "Metformin - T1D vs. T2D")
df_padj <- merge(df_padj, df_padj_merge, by="Genera")

#Subsetting taxonomy when running with metadatamed
Metadata2 <- MetadataMed
#Metadata2$BMIq<-factor(Metadata2$BMIq)
Metadata2$med_insulin<-factor(Metadata2$med_insulin)
Metadata2$med_statin<-factor(Metadata2$med_statin)
Metadata2$med_protonpump_inhibitor<-factor(Metadata2$med_protonpump_inhibitor)
##Applying subsetting to OTU tables
Taxonomy2<-dplyr::select(Taxonomy, one_of(as.character(Metadata2$MicrobiomeID)))

##Wald insulin
#Create design formula
design <- formula(paste("~ ", "Diagnosis", "+", "med_insulin"))
#Create DESeq2 object with matrix and metadata
dds <- DESeqDataSetFromMatrix(countData = Taxonomy2,
                              colData = Metadata2,
                              design = design)

##Assess and calculate size factors using the different methods
SF<-data.frame(Ratio=sizeFactors(estimateSizeFactors(dds, type="ratio")),
              Poscounts=sizeFactors(estimateSizeFactors(dds, type="poscounts")),
              Iterate=sizeFactors(estimateSizeFactors(dds, type="poscounts")),
              # "iterate" takes a lot of time changed to "poscounts" but kept due to the
              # following code
              Relative=colSums(Taxonomy2)/mean(colSums(Taxonomy2))
              )

```



```

SF<-add_rownames(SF, var="MicrobiomeID")
#Adding total abundances
TotalCounts<-readRDS(path)
TotalCountsProcess <-
  data.frame(MicrobiomeID=TotalCounts$DF_Save_w$ID,
             CellNorm=TotalCounts$DF_Save_w$Cells_per_g_feces_FR_corrected_mean)
TotalCountsProcess$MicrobiomeID <- paste("L", TotalCountsProcess$MicrobiomeID,
                                         sep="")
SF2<-merge(SF, TotalCountsProcess, by="MicrobiomeID")

#One value is NaN in sample 602059 assigns value as average
SF2$CellNorm[is.nan(SF2$CellNorm)]<-mean(na.omit(SF2$CellNorm))
SF2$CellNormStand<-SF2$CellNorm/mean(SF2$CellNorm) #Watch out for NaN values can assign
#average, but wants the error

SF3<-merge(Metadata2, SF2, by="MicrobiomeID")
#DESeq divides with sizeFactor (High cell count should have low sizeFactor providing
#larger counts in a sample)
#Still have to consider seq data is relative
SF3$NormRelCell<-SF3$Relative/SF3$CellNormStand
##Select size factors calculated above for normalization
dds@colData@listData$sizeFactor <- SF3[,20]

##See vignette for note on factor levels
#Filtering of the Counttable. Bare minimum is performed later. Also to reduce memory of
#the dds
dds <- dds[ rowSums(counts(dds))>(50*length(Taxonomy2)),] #Previously 0 instead of 1

#Estimate dispersions and fit the GLM
dds <- DESeq(dds)

res<-results(dds)
summary(res)

##
## out of 124 with nonzero total read count
## adjusted p-value < 0.1
## LFC > 0 (up)      : 9, 7.3%
## LFC < 0 (down)   : 2, 1.6%
## outliers [1]     : 0, 0%
## low counts [2]   : 0, 0%
## (mean count < 0)
## [1] see 'cooksCutoff' argument of ?results
## [2] see 'independentFiltering' argument of ?results

resultsNames(dds)

## [1] "Intercept"          "Diagnosis_T1D_vs_LADA" "Diagnosis_T2D_vs_LADA"
## [4] "med_insulin_1_vs_0"

#Threshold for FDR-adjusted p-values
padj_threshold <- 0.1

```

```

if (is.factor(colData(dds)[,"Diagnosis"]) == TRUE) {

#Find all two-wise combinations of levels in chosen test factor
test <- combn(levels(colData(dds)[,"Diagnosis"]), 2)
foo = test[1,]
poo = test[2,]

#Do DESeq2 analysis on all combinations of levels and save as list
result <- vector("list",length(foo))
for (i in 1:length(foo) ) {
  for (j in 1:length(poo)) {
    result[i] = results(dds, contrast = c("Diagnosis" ,foo[i], poo[i]))
  }
}

#Produce output tables with significant taxa from each comparison
res_list <- vector("list",length(foo))
for (i in 1:length(result) ) {
  res_stat <- data.frame(result[i])
  res_stat <- res_stat[is.na(res_stat$pvalue) == FALSE,]
  stat_sig <- na.omit(res_stat[res_stat$padj < padj_threshold,])
  res_stat$gene <- rownames(res_stat)
  res_stat$g1 <- test[1,i]
  res_stat$g2 <- test[2,i]
  res_stat$compare <- paste(test[1,i], "vs", test[2,i])
  res_list[i] <- list(res_stat)
}

res_stat <- do.call('cbind', res_list)
#rownames(res_stat) <- 1:nrow(res_stat)
#res_stat <- res_stat[with(res_stat, order(padj, pvalue, abs(log2FoldChange))),]
#stat_sig <- na.omit(res_stat[res_stat$padj < padj_threshold,])
}

((res_stat[,7]==res_stat[,17])==res_stat[,27]==res_stat[,7]))

## [1] TRUE TRUE
## [16] TRUE TRUE
## [31] TRUE TRUE
## [46] TRUE TRUE
## [61] TRUE TRUE
## [76] TRUE TRUE
## [91] TRUE TRUE
## [106] TRUE TRUE
## [121] TRUE TRUE TRUE TRUE

#res_stat[2,c(10,20,30)]
#testordernone==testorderBMI
df_log2_merge <- res_stat[,c(7,2,12,22)]
colnames(df_log2_merge)<- c("Genera", "Insulin - LADA vs. T1D",
                          "Insulin - LADA vs. T2D", "Insulin - T1D vs. T2D")
df_log2 <- merge(df_log2, df_log2_merge, by="Genera")

```

```

df_padj_merge <- res_stat[,c(7,6,16,26)]
colnames(df_padj_merge)<- c("Genera", "Insulin - LADA vs. T1D",
                           "Insulin - LADA vs. T2D", "Insulin - T1D vs. T2D")
df_padj <- merge(df_padj, df_padj_merge, by="Genera")

##Wald statins
#Create design formula
design <- formula(paste("~ ", "Diagnosis", "+", "med_statins"))
#Create DESeq2 object with matrix and metadata
dds <- DESeqDataSetFromMatrix(countData = Taxonomy2,
                              colData = Metadata2,
                              design = design)

##Select size factors calculated above for normalization
dds@colData@listData$sizeFactor <- SF3[,20]

##See vignette for note on factor levels
#Filtering of the Counttable. Bare minimum is performed later. Also to reduce memory of

#the dds
dds <- dds[ rowSums(counts(dds))>(50*length(Taxonomy2)),] #Previously 0 instead of 1

#Estimate dispersions and fit the GLM
dds <- DESeq(dds)

res<-results(dds)
summary(res)

##
## out of 124 with nonzero total read count
## adjusted p-value < 0.1
## LFC > 0 (up)      : 2, 1.6%
## LFC < 0 (down)   : 2, 1.6%
## outliers [1]     : 0, 0%
## low counts [2]   : 0, 0%
## (mean count < 0)
## [1] see 'cooksCutoff' argument of ?results
## [2] see 'independentFiltering' argument of ?results

resultsNames(dds)

## [1] "Intercept"          "Diagnosis_T1D_vs_LADA" "Diagnosis_T2D_vs_LADA"
## [4] "med_statins_1_vs_0"

#Threshold for FDR-adjusted p-values
padj_threshold <- 0.1

```

```

if (is.factor(colData(dds)[,"Diagnosis"]) == TRUE) {

#Find all two-wise combinations of levels in chosen test factor
test <- combn(levels(colData(dds)[,"Diagnosis"]), 2)
foo = test[1,]
poo = test[2,]

#Do DESeq2 analysis on all combinations of levels and save as list
result <- vector("list",length(foo))
for (i in 1:length(foo) ) {
  for (j in 1:length(poo)) {
    result[i] = results(dds, contrast = c("Diagnosis" ,foo[i], poo[i]))
  }
}

#Produce output tables with significant taxa from each comparison
res_list <- vector("list",length(result))
for (i in 1:length(result) ) {
  res_stat <- data.frame(result[i])
  res_stat <- res_stat[is.na(res_stat$pvalue) == FALSE,]
  stat_sig <- na.omit(res_stat[res_stat$padj < padj_threshold,])
  res_stat$gene <- rownames(res_stat)
  res_stat$g1 <- test[1,i]
  res_stat$g2 <- test[2,i]
  res_stat$compare <- paste(test[1,i], "vs", test[2,i])
  res_list[i] <- list(res_stat)
}

res_stat <- do.call('cbind', res_list)
#rownames(res_stat) <- 1:nrow(res_stat)
#res_stat <- res_stat[with(res_stat, order(padj, pvalue, abs(log2FoldChange))),]
#stat_sig <- na.omit(res_stat[res_stat$padj < padj_threshold,])
}

((res_stat[,7]==res_stat[,17])==res_stat[,27]==res_stat[,7])

```

```

## [1] TRUE TRUE
## [16] TRUE TRUE
## [31] TRUE TRUE
## [46] TRUE TRUE
## [61] TRUE TRUE
## [76] TRUE TRUE
## [91] TRUE TRUE
## [106] TRUE TRUE
## [121] TRUE TRUE TRUE TRUE

```

```

#res_stat[2,c(10,20,30)]
#testordernone==testorderBMI
df_log2_merge <- res_stat[,c(7,2,12,22)]
colnames(df_log2_merge)<- c("Genera", "Statins - LADA vs. T1D",
                          "Statins - LADA vs. T2D", "Statins - T1D vs. T2D")
df_log2 <- merge(df_log2, df_log2_merge, by="Genera")

```

```

df_padj_merge <- res_stat[,c(7,6,16,26)]
colnames(df_padj_merge)<- c("Genera", "Statins - LADA vs. T1D",
                           "Statins - LADA vs. T2D", "Statins - T1D vs. T2D")
df_padj <- merge(df_padj, df_padj_merge, by="Genera")

##Wald proton pump inhibitors
#Create design formula
design <- formula(paste("~ ", "Diagnosis", "+", "med_protonpump_inhibitor"))
#Create DESeq2 object with matrix and metadata
dds <- DESeqDataSetFromMatrix(countData = Taxonomy2,
                              colData = Metadata2,
                              design = design)

##Select size factors calculated above for normalization
dds@colData@listData$sizeFactor <- SF3[,20]

##See vignette for note on factor levels
#Filtering of the Counttable. Bare minimum is performed later. Also to reduce memory of
#the dds
dds <- dds[ rowSums(counts(dds))>(50*length(Taxonomy2)),] #Previously 0 instead of 1

#Estimate dispersions and fit the GLM
dds <- DESeq(dds)

res<-results(dds)
summary(res)

##
## out of 124 with nonzero total read count
## adjusted p-value < 0.1
## LFC > 0 (up)      : 0, 0%
## LFC < 0 (down)   : 5, 4%
## outliers [1]     : 5, 4%
## low counts [2]   : 0, 0%
## (mean count < 0)
## [1] see 'cooksCutoff' argument of ?results
## [2] see 'independentFiltering' argument of ?results

resultsNames(dds)

## [1] "Intercept"
## [3] "Diagnosis_T2D_vs_LADA"
## [2] "Diagnosis_T1D_vs_LADA"
## [4] "med_protonpump_inhibitor_1_vs_0"

```

```

#Threshold for FDR-adjusted p-values
padj_threshold <- 0.1

if (is.factor(colData(dds)[,"Diagnosis"]) == TRUE) {

#Find all two-wise combinations of levels in chosen test factor
test <- combn(levels(colData(dds)[,"Diagnosis"]), 2)
foo = test[1,]
poo = test[2,]

#Do DESeq2 analysis on all combinations of levels and save as list
result <- vector("list",length(foo))
for (i in 1:length(foo) ) {
  for (j in 1:length(poo)) {
    result[i] = results(dds, contrast = c("Diagnosis" ,foo[i], poo[i]))
  }
}

#Produce output tables with significant taxa from each comparison
res_list <- vector("list",length(foo))
for (i in 1:length(result) ) {
  res_stat <- data.frame(result[i])
  res_stat <- res_stat[is.na(res_stat$pvalue) == FALSE,]
  stat_sig <- na.omit(res_stat[res_stat$padj < padj_threshold,])
  res_stat$gene <- rownames(res_stat)
  res_stat$g1 <- test[1,i]
  res_stat$g2 <- test[2,i]
  res_stat$compare <- paste(test[1,i], "vs", test[2,i])
  res_list[i] <- list(res_stat)
}

res_stat <- do.call('cbind', res_list)
#rownames(res_stat) <- 1:nrow(res_stat)
#res_stat <- res_stat[with(res_stat, order(padj, pvalue, abs(log2FoldChange))),]
#stat_sig <- na.omit(res_stat[res_stat$padj < padj_threshold,])
}

((res_stat[,7]==res_stat[,17])==res_stat[,27]==res_stat[,7])

```

```

## [1] TRUE TRUE
## [16] TRUE TRUE
## [31] TRUE TRUE
## [46] TRUE TRUE
## [61] TRUE TRUE
## [76] TRUE TRUE
## [91] TRUE TRUE
## [106] TRUE TRUE

```

```

#res_stat[2,c(10,20,30)]
#testordernone==testorderBMI
df_log2_merge <- res_stat[,c(7,2,12,22)]
colnames(df_log2_merge)<- c("Genera", "PPI - LADA vs. T1D",
                          "PPI - LADA vs. T2D", "PPI - T1D vs. T2D")

```

```

df_log2 <- merge(df_log2, df_log2_merge, by="Genera")

df_padj_merge <- res_stat[,c(7,6,16,26)]
colnames(df_padj_merge)<- c("Genera", "PPI - LADA vs. T1D",
                          "PPI - LADA vs. T2D", "PPI - T1D vs. T2D")
df_padj <- merge(df_padj, df_padj_merge, by="Genera")

##Wald all
#Create design formula
design <- formula(paste("~ ", "Diagnosis",
                       "+", "BMIq",
                       #"+", "Metformin",
                       "+", "med_insulin",
                       "+", "med_statins",
                       "+", "med_protonpump_inhibitor"))
#Create DESeq2 object with matrix and metadata
dds <- DESeqDataSetFromMatrix(countData = Taxonomy2,
                              colData = Metadata2,
                              design = design)

##Select size factors calculated above for normalization
dds@colData@listData$sizeFactor <- SF3[,20]

##See vignette for note on factor levels
#Filtering of the Counttable. Bare minimum is performed later. Also to reduce memory of

#the dds
dds <- dds[ rowSums(counts(dds))>(50*length(Taxonomy2)),] #Previously 0 instead of 1

#Estimate dispersions and fit the GLM
dds <- DESeq(dds)

res<-results(dds)
summary(res)

##
## out of 124 with nonzero total read count
## adjusted p-value < 0.1
## LFC > 0 (up)      : 1, 0.81%
## LFC < 0 (down)   : 0, 0%
## outliers [1]     : 13, 10%
## low counts [2]   : 0, 0%
## (mean count < 0)
## [1] see 'cooksCutoff' argument of ?results
## [2] see 'independentFiltering' argument of ?results

```

```
resultsNames(dds)
```

```
## [1] "Intercept"                "Diagnosis_T1D_vs_LADA"  
## [3] "Diagnosis_T2D_vs_LADA"     "BMIq"  
## [5] "med_insulin_1_vs_0"        "med_statins_1_vs_0"  
## [7] "med_protonpump_inhibitor_1_vs_0"
```

```
#Threshold for FDR-adjusted p-values
```

```
padj_threshold <- 0.1
```

```
if (is.factor(colData(dds)[,"Diagnosis"]) == TRUE) {
```

```
#Find all two-wise combinations of levels in chosen test factor
```

```
test <- combn(levels(colData(dds)[,"Diagnosis"]), 2)
```

```
foo = test[1,]
```

```
poo = test[2,]
```

```
#Do DESeq2 analysis on all combinations of levels and save as list
```

```
result <- vector("list",length(foo))
```

```
for (i in 1:length(foo) ) {
```

```
  for (j in 1:length(poo)) {
```

```
    result[i] = results(dds, contrast = c("Diagnosis" ,foo[i], poo[i]))
```

```
  }
```

```
}
```

```
#Produce output tables with significant taxa from each comparison
```

```
res_list <- vector("list",length(foo))
```

```
for (i in 1:length(result) ) {
```

```
  res_stat <- data.frame(result[i])
```

```
  res_stat <- res_stat[is.na(res_stat$pvalue) == FALSE,]
```

```
  stat_sig <- na.omit(res_stat[res_stat$padj < padj_threshold,])
```

```
  res_stat$gene <- rownames(res_stat)
```

```
  res_stat$g1 <- test[1,i]
```

```
  res_stat$g2 <- test[2,i]
```

```
  res_stat$compare <- paste(test[1,i], "vs", test[2,i])
```

```
  res_list[i] <- list(res_stat)
```

```
}
```

```
res_stat <- do.call('cbind', res_list)
```

```
#rownames(res_stat) <- 1:nrow(res_stat)
```

```
#res_stat <- res_stat[with(res_stat, order(padj, pvalue, abs(log2FoldChange))),]
```

```
#stat_sig <- na.omit(res_stat[res_stat$padj < padj_threshold,])
```

```
}
```

```
((res_stat[,7]==res_stat[,17])==res_stat[,27]==res_stat[,7]))
```

```
## [1] TRUE  
## [16] TRUE  
## [31] TRUE  
## [46] TRUE  
## [61] TRUE  
## [76] TRUE  
## [91] TRUE TRUE
```



```
## [106] TRUE TRUE TRUE TRUE TRUE TRUE
```

```
#res_stat[2,c(10,20,30)]
#testordernone==testorderBMI
df_log2_merge <- res_stat[,c(7,2,12,22)]
colnames(df_log2_merge)<- c("Genera", "All - LADA vs. T1D",
                           "All - LADA vs. T2D", "All - T1D vs. T2D")
df_log2 <- merge(df_log2, df_log2_merge, by="Genera")

df_padj_merge <- res_stat[,c(7,6,16,26)]
colnames(df_padj_merge)<- c("Genera", "All - LADA vs. T1D",
                           "All - LADA vs. T2D", "All - T1D vs. T2D")
df_padj <- merge(df_padj, df_padj_merge, by="Genera")

#Filter or merge according to list of genera wanting to include.
#Generalist<-c("Actinomyces", "Roseburia", "Bifidobacterium", "Odoribacter",
#
                "Lactobacillus", "Faecalibacterium")
#Based on lowest padj from LRT none. #Below median of LRT none
Generalist <- df_padj[df_padj$`LRT none` < median(df_padj$`LRT none`), 1]
df_log2_plot<-subset(df_log2, Genera %in% Generalist)
df_padj_plot<-subset(df_padj, Genera %in% Generalist)

#Change genera to rownames
row.names(df_log2_plot) <- df_log2_plot$Genera
df_log2_plot <- select(df_log2_plot, -one_of("Genera"))

row.names(df_padj_plot) <- df_padj_plot$Genera
df_padj_plot <- select(df_padj_plot, -one_of("Genera"))

#Make symbol according to significance level
df_padj_plotsym<-df_padj_plot #Gets a df with same dimensions
#overrides so can just go from lowest and up
for (i in 1:nrow(df_padj_plotsym)) {
  for (j in 1:ncol(df_padj_plotsym)) {
    ifelse(df_padj_plot[i,j]<0.001, df_padj_plotsym[i,j]<-"****",
           ifelse(df_padj_plot[i,j]<0.01, df_padj_plotsym[i,j]<- "***",
                  ifelse(df_padj_plot[i,j]<0.05, df_padj_plotsym[i,j]<- "**",
                         ifelse(df_padj_plot[i,j]<0.1, df_padj_plotsym[i,j]<- "\U00B7",
                                ifelse(df_padj_plot[i,j]<2, df_padj_plotsym[i,j]<- "", "hmmm"))))) #2 values range 0-1
    #knows it is less
  }
}

max(abs(df_log2_plot))
```

```
## [1] 7.55298
```

```
range <- max(abs(df_log2_plot))
```

```
#Create heatmap  
range(df_log2_plot)
```

```
## [1] -7.552980 3.665727
```

```
pheatmap(df_log2_plot,  
  display_numbers = df_padj_plotsym,  
  gaps_col = c(7, 14, 21, 24, 27, 30),  
  cluster_rows=FALSE,  
  show_rownames=TRUE,  
  cluster_cols=FALSE,  
  show_colnames=TRUE,  
  fontsize_number=20,  
  legend=TRUE,  
  breaks = seq(-range, range, length.out = 30), #Colors centered at 0  
  color=colorRampPalette(c("blue", "white", "red"))(30))
```

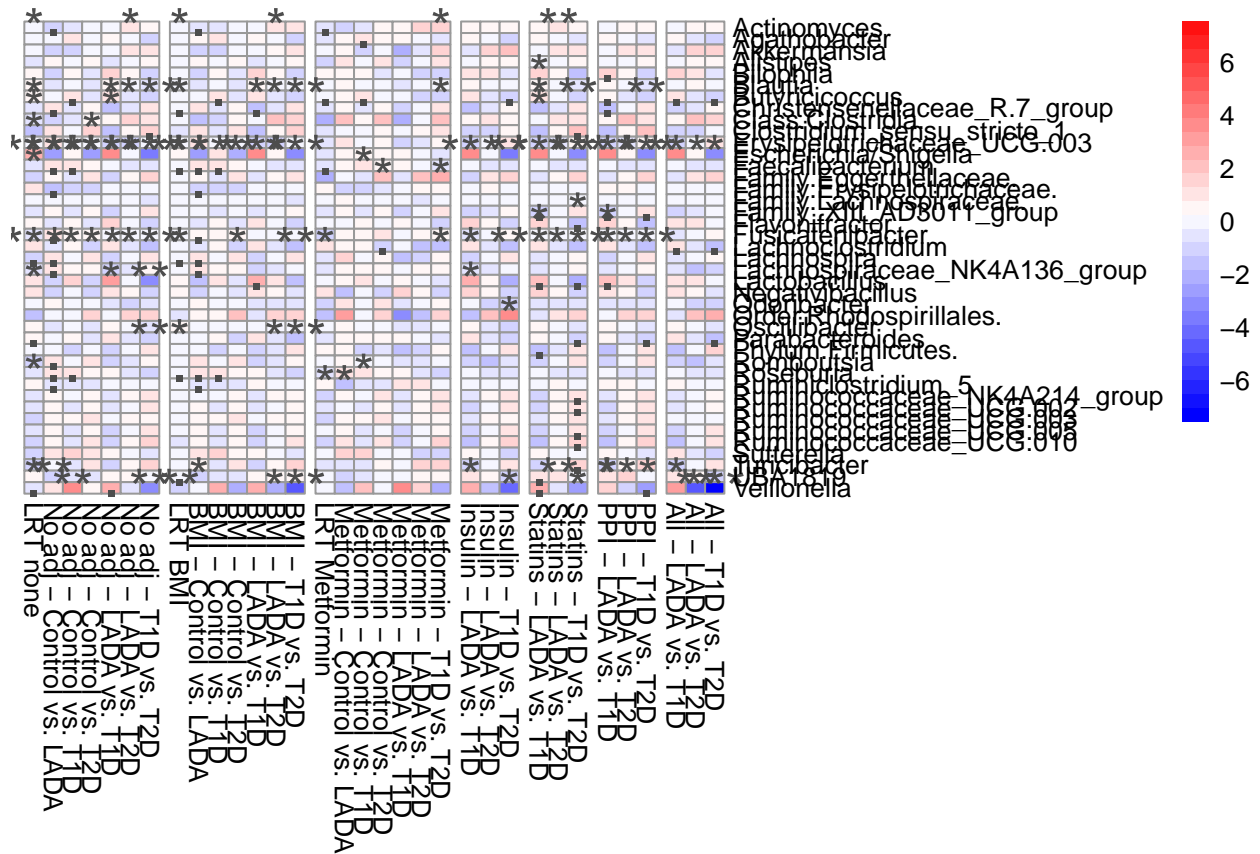

```
#Draw the heatmap  
dev.off()
```

```
## pdf
## 3

pdf(paste("MicroLADA_Figure3DESeqHeatmap1", ".pdf", sep=""), width=10, height=7)
pheatmap(df_log2_plot,
  display_numbers = df_padj_plotsym,
  gaps_col = c(7, 14, 21, 24, 27, 30),
  cluster_rows=FALSE,
  show_rownames=TRUE,
  cluster_cols=FALSE,
  show_colnames=TRUE,
  fontsize_number=10,
  legend=TRUE,
  breaks = seq(-range, range, length.out = 30),
  color=colorRampPalette(c("blue", "white", "red"))(30))

dev.off()
```

```
## pdf
## 3

#Make density plot
#In the end a solution with new_scale_fill and defining two background datasets
df_density<-data.frame(values=as.vector(as.matrix(df_log2_plot)))
xvalues <- c(-7, 7)
coloring<-c(colorRampPalette(c("red", "white", "red"))(30))
coloring2<-c(colorRampPalette(c("blue", "white", "blue"))(30))
background <- data.frame(lower = seq( xvalues[1], xvalues[2]-sum(abs(xvalues))/30,
  sum(abs(xvalues))/30 ),
  upper = seq( xvalues[1]+sum(abs(xvalues))/30, xvalues[2],
  sum(abs(xvalues))/30 ),
  col = coloring,
  col2 = coloring2)

background1<-background[1:15,]
background2<-background[16:30,]

ggplot() +
  geom_rect(data = background1 ,
    mapping = aes(xmin = lower ,
      xmax = upper ,
      ymin = 0 ,
      ymax = 0.7 ,
      fill = col ) ,
    alpha = .9 ) +
  scale_fill_manual(values = alpha(background1$col2, 0.9))+
  new_scale_fill()+
  geom_rect(data = background2 ,
    mapping = aes(xmin = lower ,
      xmax = upper ,
      ymin = 0 ,
      ymax = 0.7 ,
      fill = col2 ) ,
```

```

        alpha = .9 ) +
scale_fill_manual(values = alpha(background1$col, 0.9)) +
theme_classic()+
geom_density(data = df_density, aes(x=values), size=2) +
theme_classic() +
xlab("Log2-fold change") +
ylab("Density") +
theme(legend.position = "none")

pdf(paste("MicroLADA_Figure3DESeqHeatmap1density", ".pdf", sep=""), width=3, height=3)
ggplot() +
  geom_rect(data = background1 ,
            mapping = aes(xmin = lower ,
                          xmax = upper ,
                          ymin = 0 ,
                          ymax = 0.7 ,
                          fill = col ) ,
            alpha = .9 ) +
scale_fill_manual(values = alpha(background1$col2, 0.9))+
new_scale_fill()+
geom_rect(data = background2 ,
            mapping = aes(xmin = lower ,
                          xmax = upper ,
                          ymin = 0 ,
                          ymax = 0.7 ,
                          fill = col2 ) ,
            alpha = .9 ) +
scale_fill_manual(values = alpha(background1$col, 0.9)) +
theme_classic()+
geom_density(data = df_density, aes(x=values), size=1) +
theme_classic() +
xlab("Log2-fold change") +
ylab("Density") +
theme(legend.position = "none")
dev.off()

```

```

## pdf
## 3

```

```

##Here the other genera
#Filter or merge according to list of genera wanting to include.
#GeneraList<-c("Actinomyces", "Roseburia", "Bifidobacterium", "Odoribacter",
#
          "Lactobacillus", "Faecalibacterium")
#Based on lowest padj from LRT none. #Below median of LRT none
GeneraList <- df_padj[df_padj$`LRT none` >= median(df_padj$`LRT none`), 1]
df_log2_plot<-subset(df_log2, Genera %in% GeneraList)
df_padj_plot<-subset(df_padj, Genera %in% GeneraList)

#Change genera to rownames
row.names(df_log2_plot) <- df_log2_plot$Genera
df_log2_plot <- select(df_log2_plot, -one_of("Genera"))

```

```

row.names(df_padj_plot) <- df_padj_plot$Genera
df_padj_plot <- select(df_padj_plot, -one_of("Genera"))

#Make symbol according to significance level
df_padj_plotsym<-df_padj_plot #Gets a df with same dimensions
#overrides so can just go from lowest and up
for (i in 1:nrow(df_padj_plotsym)) {
  for (j in 1:ncol(df_padj_plotsym)) {
    ifelse(df_padj_plot[i,j]<0.001, df_padj_plotsym[i,j]<-"***",
           ifelse(df_padj_plot[i,j]<0.01, df_padj_plotsym[i,j]<-"**",
                  ifelse(df_padj_plot[i,j]<0.05, df_padj_plotsym[i,j]<-"*",
                         ifelse(df_padj_plot[i,j]<0.1, df_padj_plotsym[i,j]<-"U00B7",
                                ifelse(df_padj_plot[i,j]<2, df_padj_plotsym[i,j]<-"", "hmmm")))))) #2 values range 0-1
    #knows it is less
  }
}

#max(abs(df_log2_plot))
#range <- max(abs(df_log2_plot)) #Would rather use the previous to make the heatmaps
#directly comparable

#Create heatmap
range(df_log2_plot)

```

```
## [1] -2.913747 2.518626
```

```

pheatmap(df_log2_plot,
         display_numbers = df_padj_plotsym,
         gaps_col = c(7, 14, 21, 24, 27, 30),
         cluster_rows=FALSE,
         show_rownames=TRUE,
         cluster_cols=FALSE,
         show_colnames=TRUE,
         fontsize_number=20,
         legend=TRUE,
         breaks = seq(-range, range, length.out = 30), #Colors centered at 0
         color=colorRampPalette(c("blue", "white", "red"))(30))

#Draw the heatmap
dev.off()

```

```
## null device
##          1
```

```

pdf(paste("MicroLADA_Figure3DESeqHeatmap2", ".pdf", sep=""), width=10, height=7)
pheatmap(df_log2_plot,
         display_numbers = df_padj_plotsym,
         gaps_col = c(7, 14, 21, 24, 27, 30),
         cluster_rows=FALSE,

```

```

show_rownames=TRUE,
cluster_cols=FALSE,
show_colnames=TRUE,
fontsize_number=10,
legend=TRUE,
breaks = seq(-range, range, length.out = 30),
color=colorRampPalette(c("blue", "white", "red"))(30))

dev.off()

```

```

## null device
##          1

```

```

#Make density plot
#In the end a solution with new_scale_fill and defining two background datasets
df_density<-data.frame(values=as.vector(as.matrix(df_log2_plot)))
xvalues <- c(-7, 7)
coloring<-c(colorRampPalette(c("red", "white", "red"))(30))
coloring2<-c(colorRampPalette(c("blue", "white", "blue"))(30))
background <- data.frame(lower = seq( xvalues[1], xvalues[2]-sum(abs(xvalues))/30,
                                   sum(abs(xvalues))/30 ),
                          upper = seq( xvalues[1]+sum(abs(xvalues))/30, xvalues[2],
                                   sum(abs(xvalues))/30 ),
                          col = coloring,
                          col2 = coloring2)

background1<-background[1:15,]
background2<-background[16:30,]

ggplot() +
  geom_rect(data = background1 ,
            mapping = aes(xmin = lower ,
                          xmax = upper ,
                          ymin = 0 ,
                          ymax = 0.75 ,
                          fill = col ) ,
            alpha = .9 ) +
  scale_fill_manual(values = alpha(background1$col2, 0.9))+
  new_scale_fill()+
  geom_rect(data = background2 ,
            mapping = aes(xmin = lower ,
                          xmax = upper ,
                          ymin = 0 ,
                          ymax = 0.75 ,
                          fill = col2 ) ,
            alpha = .9 ) +
  scale_fill_manual(values = alpha(background1$col, 0.9)) +
  theme_classic()+
  geom_density(data = df_density, aes(x=values), size=2) +
  theme_classic() +
  xlab("Log2-fold change") +
  ylab("Density") +
  theme(legend.position = "none")

```

```

pdf(paste("MicroLADA_Figure3DESeqHeatmap2density", ".pdf", sep=""), width=6, height=4)
ggplot() +
  geom_rect(data = background1 ,
            mapping = aes(xmin = lower ,
                          xmax = upper ,
                          ymin = 0 ,
                          ymax = 0.75 ,
                          fill = col ) ,
            alpha = .9 ) +
  scale_fill_manual(values = alpha(background1$col2, 0.9))+
  new_scale_fill()+
  geom_rect(data = background2 ,
            mapping = aes(xmin = lower ,
                          xmax = upper ,
                          ymin = 0 ,
                          ymax = 0.75 ,
                          fill = col2 ) ,
            alpha = .9 ) +
  scale_fill_manual(values = alpha(background1$col, 0.9)) +
  theme_classic()+
  geom_density(data = df_density, aes(x=values), size=2) +
  theme_classic() +
  xlab("Log2-fold change") +
  ylab("Density") +
  theme(legend.position = "none")
dev.off()

```

```

## pdf
## 2

```

```

#Make table log2fold changes and p values
df_log2 <- data.frame(df_log2[,-1], row.names = df_log2[,1])
df_padj <- data.frame(df_padj[,-1], row.names = df_padj[,1])

if((sum(colnames(df_log2)!=colnames(df_padj))==0)==FALSE) {stop("Columns does not match")}
if((sum(rownames(df_log2)!=rownames(df_padj))==0)==FALSE) {stop("Rows does not match")}

df_paste <- df_log2 #just to get dimensions, row- and columnnames

for (i in 1:nrow(df_log2)) {
  for (j in 1:ncol(df_log2)) {
    df_paste[i,j]<-paste(signif(df_log2[i,j], digits=4), " (",
                        signif(df_padj[i,j], digits=4) , ")")
  }
}
write.table(df_paste, file="DESeqHeatmap12fpval_SupTab.txt", sep="\t", dec=",", row.names = T)

```

## Additional

### Session information

```
sessionInfo()
```

```
## R version 4.1.2 (2021-11-01)
## Platform: x86_64-w64-mingw32/x64 (64-bit)
## Running under: Windows 10 x64 (build 19044)
##
## Matrix products: default
##
## locale:
## [1] LC_COLLATE=Danish_Denmark.1252 LC_CTYPE=Danish_Denmark.1252
## [3] LC_MONETARY=Danish_Denmark.1252 LC_NUMERIC=C
## [5] LC_TIME=Danish_Denmark.1252
##
## attached base packages:
## [1] stats4      grid        tcltk       stats       graphics    grDevices   utils
## [8] datasets    methods     base
##
## other attached packages:
## [1] Maaslin2_1.8.0           DESeq2_1.34.0
## [3] SummarizedExperiment_1.24.0 Biobase_2.54.0
## [5] MatrixGenerics_1.6.0     matrixStats_0.61.0
## [7] GenomicRanges_1.46.1     GenomeInfoDb_1.30.0
## [9] IRanges_2.28.0           S4Vectors_0.32.3
## [11] BiocGenerics_0.40.0      SIAMCAT_1.14.0
## [13] phyloseq_1.38.0         mlr_2.19.0
## [15] ParamHelpers_1.14        ALDEx2_1.26.0
## [17] BiocParallel_1.28.3     mixOmics_6.18.1
## [19] ggnewscale_0.4.5        hablar_0.3.0
## [21] VennDiagram_1.7.1       futile.logger_1.4.3
## [23] cowplot_1.1.1           seqinr_4.2-8
## [25] stringr_1.4.0           RColorBrewer_1.1-2
## [27] pheatmap_1.0.12         BiodiversityR_2.14-1
## [29] curl_4.3.2              htmlTable_2.4.0
## [31] plotly_4.10.0           nlme_3.1-153
## [33] exactRankTests_0.8-34   mime_0.12
## [35] digest_0.6.28           tidyr_1.1.4
## [37] reshape2_1.4.4         compositions_2.0-2
## [39] zCompositions_1.3.4     truncnorm_1.0-8
## [41] NADA_1.6-1.1            survival_3.2-13
## [43] MASS_7.3-54            gridExtra_2.3
## [45] vegan_2.5-7            lattice_0.20-45
## [47] permute_0.9-5          ggplot2_3.3.5
## [49] knitr_1.37             dplyr_1.0.7
## [51] tibble_3.1.6
##
## loaded via a namespace (and not attached):
## [1] bit64_4.0.5           DelayedArray_0.20.0   data.table_1.14.2
## [4] rpart_4.1-15         KEGGREST_1.34.0      RCurl_1.98-1.5
## [7] generics_0.1.1       lambda.r_1.2.4       RSQLite_2.2.9
```



```

## [10] proxy_0.4-26          bit_4.0.4          bayesm_3.1-4
## [13] PRROC_1.3.1          relimp_1.0-5       xfun_0.29
## [16] hms_1.1.1            Liblinear_2.10-12 evaluate_0.14
## [19] DEoptimR_1.0-10     fansi_0.5.0       progress_1.2.2
## [22] readxl_1.3.1        igraph_1.2.10     DBI_1.1.2
## [25] geneplotter_1.72.0  htmlwidgets_1.5.4 tensorA_0.36.2
## [28] rARPACK_0.11-0      purrr_0.3.4       ellipsis_0.3.2
## [31] crosstalk_1.2.0     corrplot_0.92     RSpectra_0.16-0
## [34] backports_1.4.1     insight_0.14.5    survey_4.1-1
## [37] annotate_1.72.0      gridBase_0.4-7    vctrs_0.3.8
## [40] abind_1.4-5         cachem_1.0.6      withr_2.4.3
## [43] RcmdrMisc_2.7-2     robustbase_0.93-9 checkmate_2.0.0
## [46] prettyunits_1.1.1   getopt_1.20.3     cluster_2.1.2
## [49] ape_5.6             lazyeval_0.2.2    crayon_1.4.2
## [52] ellipse_0.4.2       genefilter_1.76.0 labeling_0.4.2
## [55] glmnet_4.1-3        pkgconfig_2.0.3   Rcmdr_2.7-2
## [58] nnet_7.3-16         rlang_0.4.12      lifecycle_1.0.1
## [61] sandwich_3.0-1     cellranger_1.1.0  Matrix_1.4-0
## [64] carData_3.0-5       lpsymphony_1.22.0 Rhdf5lib_1.16.0
## [67] boot_1.3-28         zoo_1.8-9          base64enc_0.1-3
## [70] png_0.1-7           viridisLite_0.4.0 bitops_1.0-7
## [73] rhdf5filters_1.6.0  pROC_1.18.0       Biostrings_2.62.0
## [76] blob_1.2.2          shape_1.4.6        jpeg_0.1-9
## [79] scales_1.1.1        memoise_2.0.1     magrittr_2.0.1
## [82] plyr_1.8.6          zlibbioc_1.40.0   compiler_4.1.2
## [85] lme4_1.1-27.1      ade4_1.7-18        XVector_0.34.0
## [88] formatR_1.11        Formula_1.2-4      mgcv_1.8-38
## [91] tidyselect_1.1.1   stringi_1.7.6     tcltk2_1.2-11
## [94] forcats_0.5.1      highr_0.9          mitools_2.4
## [97] yaml_2.2.1          locfit_1.5-9.4    latticeExtra_0.6-29
## [100] ggrepel_0.9.1       fastmatch_1.1-3   tools_4.1.2
## [103] parallel_4.1.2      rstudioapi_0.13   foreach_1.5.1
## [106] foreign_0.8-81     optparse_1.7.1    farver_2.1.0
## [109] RcppZigurat_0.1.6  nortest_1.0-4     Rcpp_1.0.7
## [112] car_3.0-12          infotheo_1.2.0    httr_1.4.2
## [115] AnnotationDbi_1.56.2 effects_4.2-0     colorspace_2.0-2
## [118] XML_3.99-0.8        splines_4.1.2     multtest_2.50.0
## [121] xtable_1.8-4        jsonlite_1.7.2    nloptr_1.2.2.3
## [124] futile.options_1.0.1 BBmisc_1.11        corpcor_1.6.10
## [127] Rfast_2.0.4         R6_2.5.1          Hmisc_4.6-0
## [130] pillar_1.6.4        htmltools_0.5.2   glue_1.5.0
## [133] fastmap_1.1.0       minqa_1.2.4       class_7.3-19
## [136] beanplot_1.2        codetools_0.2-18  pcaPP_1.9-74
## [139] mvtnorm_1.1-3       utf8_1.2.2        biglm_0.9-2.1
## [142] parallelMap_1.5.1  rmarkdown_2.11    biomformat_1.22.0
## [145] munsell_0.5.0       e1071_1.7-9       rhdf5_2.38.0
## [148] GenomeInfoDbData_1.2.7 iterators_1.0.13   haven_2.4.3
## [151] gtable_0.3.0

```

This document was processed on:

```
Sys.Date()
```

```
## [1] "2022-02-24"
```

**Supplementary file 2: Functional R analysis.** Supporting information include additional data summary, PCoA dimensions 1-3 also subsetted to diagnostic groups in pairs, heatmaps, CCA, venn diagrams comparing significant entities between the other groups and violin plots of all functional KEGG orthologs that had a significant result obtained from the DESeq (Wald) test.

# Microbiome analysis LADA study – Functional analysis

Casper Sahl Poulsen

februar 24, 2022

## Contents

|                                                                           |     |
|---------------------------------------------------------------------------|-----|
| Introduction . . . . .                                                    | 2   |
| Samples . . . . .                                                         | 2   |
| Metadata . . . . .                                                        | 2   |
| Packages . . . . .                                                        | 2   |
| Comments running piphillin . . . . .                                      | 3   |
| Reading in data and Overview . . . . .                                    | 4   |
| Used colors throughout script . . . . .                                   | 11  |
| Analysis . . . . .                                                        | 13  |
| Summary metadata, quality of data and ecology . . . . .                   | 13  |
| Summary metadata, quality of data and ecology Metformin removed . . . . . | 26  |
| Alpha diversity . . . . .                                                 | 40  |
| Alpha diversity remove metformin . . . . .                                | 44  |
| Violin plots Dissimilarities . . . . .                                    | 47  |
| Violin plots Dissimilarities remove metformin . . . . .                   | 55  |
| PCoA . . . . .                                                            | 63  |
| PCoA remove metformin . . . . .                                           | 79  |
| Create figure 1 . . . . .                                                 | 96  |
| PERMANOVA . . . . .                                                       | 97  |
| PERMANOVA remove metformin . . . . .                                      | 103 |
| PERMANOVA MED subset . . . . .                                            | 106 |
| Pairwise PERMANOVA . . . . .                                              | 110 |
| Pairwise PERMANOVA remove metformin . . . . .                             | 113 |
| Heatmap . . . . .                                                         | 114 |
| CCA . . . . .                                                             | 116 |
| DESeq2 LRT . . . . .                                                      | 124 |
| DESeq2 LRT remove metformin . . . . .                                     | 133 |



```

library(exactRankTests)
library(nlme)
library(plotly)
library(htmlTable)
library(curl)
library(BiodiversityR)
library(pheatmap)
library(RColorBrewer)
library(stringr)
library(sequinr)
library(cowplot)
library(VennDiagram)
library(hablar)
library(ggnewscale)

#Bioconductor packages
#if (!requireNamespace("BiocManager", quietly = TRUE))
#  install.packages("BiocManager")
#BiocManager::install("mixOmics")
library("mixOmics")

#BiocManager::install("BiocParallel")
library("BiocParallel")

#BiocManager::install("ALDEx2")
library("ALDEx2")

#BiocManager::install("SIAMCAT")
library("SIAMCAT")

#BiocManager::install("DESeq2")
library("DESeq2")

# old way devtools::install_bitbucket("biobakery/maaslin2@default", ref="tip")
#BiocManager::install("Maaslin2")
library("Maaslin2")

```

## Comments running piphillin

```

##Running the online tool for piphillin had to create fasta and OTU csv
##Create fasta file of ref seqs
##otus <- paste(rep("otu", length(Taxonomy)), seq(length(Taxonomy)), sep="")
##sequences <- colnames(Taxonomy)
#write.fasta(sequences = as.list(colnames(Taxonomy)),
#            names = paste(rep("otu", length(Taxonomy)),
#                          seq(length(Taxonomy)), sep=""),
#            file.out="piphillinrepseq.fasta")

##Change names in taxonomy file to otus it does not matter that they are asv see two
##articles in mendeley on piphillin
#Taxonomy2<-Taxonomy
#names(Taxonomy2)<-paste(rep("otu", length(Taxonomy)), seq(length(Taxonomy)), sep="")

```

```

#Taxonomy3<-t(Taxonomy2)
#write.csv(Taxonomy3, file="P:/CBMR/LADA/piphillinOTU.csv")
##Added OTU to start of file manually

##Getting 3 tables from piphillin
#Object referred to as Taxonomy to make the script easily modifiable
##Not sure what this contains genome aap?
#load("ko_genome_contribution_table.Rdata")
#test<-genome_contribution[1:10,]

```

## Reading in data and Overview

Have to run “Reading in data” and “Pre-processing” from script “MicroLADA\_200220.Rmd” to generate files

```

Metadata <- read.delim(file="P:/CBMR/LADA/Text/Analysis/Metadata_200318.txt",
                      check.names=FALSE,
                      stringsAsFactors = FALSE,
                      strip.white=TRUE,
                      dec=",")

#Specify column types
Metadata <- Metadata %>% convert(chr(Metformin),
                               num(age, BMI))

#head(Metadata)
#confidential but metadata as colnames and samples as rownames

##Pathways calls them taxonomy because I'm using the script from taxonomy analysis
Taxonomy <- read.table("P:/CBMR/LADA/ko_pathway_abund_table_unnorm.txt",
                      sep="", header=TRUE, check.names=FALSE)

#Change pathways into rownames
row.names(Taxonomy)<-Taxonomy$Pathway
Taxonomy <- select(Taxonomy, -one_of("Pathway"))

##Consider rounding all values up to mimic counts
Taxonomy<-ceiling(Taxonomy)

#head(Taxonomy[,1:6])
#confidential but samples as colnames and pathways as rownames

##Read KEGG pathways annotation corresponding to the feature table
#Feature from Tue
Feature <- read.table("P:/CBMR/LADA/Piphillin_KEGG_pathways_legend.csv",
                    sep=";", header=TRUE, check.names=FALSE)
colnames(Feature)<-c("ID", "Level1", "Level2", "Level3")
#table(Feature$Level1)
#Missing from my table
UnclassMetab <- filter(Feature, Feature$Level1 == "Unclassified metabolism")

#Directly from json KEGG BRITE using BriteJSONtoRdfGithub_200810 also
#available at github csapou
Feature <-

```

```

read.delim(file="P:/CBMR/LADA/Text/Analysis/Functional/FeatureFunctional_200812.txt")
Feature <- data.frame(ID=Feature[,4], Feature[,1:3])
Feature <- rbind(Feature, UnclassMetab)
table(Feature$Level1)

```

```

##
##           Brite Hierarchies           Cellular Processes
##                    52                    33
## Environmental Information Processing   Genetic Information Processing
##                    41                    22
##           Human Diseases           Metabolism
##                    92                    168
## Not Included in Pathway or Brite           Organismal Systems
##                    24                    90
##           Unclassified metabolism
##                    10

```

```

#Remove all without path (poorly characterized)
Feature <- filter(Feature, !Level1 == "Not Included in Pathway or Brite")

```

```

if (setequal(colnames(Taxonomy), Metadata$MicrobiomeID)==FALSE) {
  stop("Metadata and Taxonomy out of sync")
}

```

```

#Check for duplicated entries
nonuniq<-data.frame(table(row.names(Taxonomy)))
nonuniq[nonuniq$Freq > 1,]

```

```

## [1] Var1 Freq
## <0 rækker> (eller 0-længde row.names)

```

```

#Different only contained in first element so it is ok that not all pathways are found
#But it is not okay if we have pathways that is not in the feature table
setdiff(Feature$ID, rownames(Taxonomy))

```

```

## [1] "ko00062"      "ko00073"      "ko00512"      "ko00532"      "ko00534"
## [6] "ko00533"      "ko00563"      "ko00904"      "ko00905"      "ko01052"
## [11] "ko00522"      "ko01059"      "ko01056"      "ko00253"      "ko00945"
## [16] "ko00941"      "ko00942"      "ko00943"      "ko00403"      "ko01058"
## [21] "ko00402"      "ko00331"      "ko00254"      "ko00998"      "ko00997"
## [26] "ko00365"      "character(0)" "ko03040"      "ko04130"      "ko04120"
## [31] "ko04014"      "ko04015"      "ko04010"      "ko04012"      "ko04310"
## [36] "ko04330"      "ko04340"      "ko04341"      "ko04350"      "ko04390"
## [41] "ko04391"      "ko04392"      "ko04370"      "ko04630"      "ko04064"
## [46] "ko04668"      "ko04022"      "ko04075"      "ko04060"      "ko04061"
## [51] "ko04512"      "ko04514"      "ko04136"      "ko04137"      "ko04139"
## [56] "ko04111"      "ko04114"      "ko04218"      "ko04510"      "ko04520"
## [61] "ko04540"      "ko04550"      "ko04810"      "ko04640"      "ko04610"
## [66] "ko04611"      "ko04620"      "ko04624"      "ko04623"      "ko04625"
## [71] "ko04650"      "ko04660"      "ko04658"      "ko04662"      "ko04664"
## [76] "ko04666"      "ko04670"      "ko04672"      "ko04062"      "ko04911"

```



```

## [81] "ko04923"      "ko04929"      "ko04912"      "ko04913"      "ko04926"
## [86] "ko04935"      "ko04924"      "ko04925"      "ko04927"      "ko04261"
## [91] "ko04270"      "ko04970"      "ko04971"      "ko04972"      "ko04975"
## [96] "ko04977"      "ko04962"      "ko04960"      "ko04961"      "ko04966"
## [101] "ko04720"      "ko04730"      "ko04723"      "ko04721"      "ko04722"
## [106] "ko04744"      "ko04745"      "ko04740"      "ko04742"      "ko04750"
## [111] "ko04320"      "ko04360"      "ko04361"      "ko04380"      "ko04710"
## [116] "ko04713"      "ko04711"      "ko04712"      "ko05202"      "ko05235"
## [121] "ko05212"      "ko05226"      "ko05214"      "ko05216"      "ko05221"
## [126] "ko05220"      "ko05217"      "ko05218"      "ko05213"      "ko05224"
## [131] "ko05223"      "ko05310"      "ko05323"      "ko05320"      "ko05321"
## [136] "ko05330"      "ko05332"      "ko05017"      "ko05032"      "ko05033"
## [141] "ko05410"      "ko05412"      "ko05414"      "ko04950"      "ko04933"
## [146] "ko05130"      "ko05135"      "ko05144"      "ko05140"      "ko01522"
## [151] "[BR:ko01001]" "[BR:ko01009]" "[BR:ko01002]" "[BR:ko01003]" "[BR:ko01005]"
## [156] "[BR:ko01011]" "[BR:ko01004]" "[BR:ko01008]" "[BR:ko01006]" "[BR:ko01007]"
## [161] "[BR:ko00199]" "[BR:ko00194]" "[BR:ko03000]" "[BR:ko03021]" "[BR:ko03019]"
## [166] "[BR:ko03041]" "[BR:ko03011]" "[BR:ko03009]" "[BR:ko03016]" "[BR:ko03012]"
## [171] "[BR:ko03110]" "[BR:ko04131]" "[BR:ko04121]" "[BR:ko03051]" "[BR:ko03032]"
## [176] "[BR:ko03036]" "[BR:ko03400]" "[BR:ko03029]" "[BR:ko02000]" "[BR:ko02044]"
## [181] "[BR:ko02042]" "[BR:ko02022]" "[BR:ko02035]" "[BR:ko04812]" "[BR:ko04147]"
## [186] "[BR:ko02048]" "[BR:ko04030]" "[BR:ko04050]" "[BR:ko04054]" "[BR:ko03310]"
## [191] "[BR:ko04040]" "[BR:ko04031]" "[BR:ko04052]" "[BR:ko04515]" "[BR:ko04090]"
## [196] "[BR:ko00535]" "[BR:ko00536]" "[BR:ko00537]" "[BR:ko04091]" "[BR:ko01504]"
## [201] "[BR:ko03200]" "[BR:ko03100]"

```

```

#Had missing represented by unclassified metabolism added from Tue
setdiff(rownames(Taxonomy), Feature$ID)

```

```
## character(0)
```

```

#Merge feature and count table
#Call last feature Genus for intercompatibility
colnames(Feature)<-c("ID", "Level_1", "Level_2", "Genus")
row.names(Feature)<-Feature$ID
TaxEdit <- merge(Feature, Taxonomy, by="row.names")

```

```

##Percent lost from merging should be nothing when getting new feature table
#Are they in sync
colnames(TaxEdit)[6:length(TaxEdit)]==colnames(Taxonomy)

```

```

## [1] TRUE TRUE
## [16] TRUE TRUE
## [31] TRUE TRUE
## [46] TRUE TRUE
## [61] TRUE TRUE
## [76] TRUE TRUE
## [91] TRUE TRUE
## [106] TRUE TRUE
## [121] TRUE TRUE
## [136] TRUE TRUE
## [151] TRUE TRUE
## [166] TRUE TRUE

```

```
## [181] TRUE TRUE
## [196] TRUE TRUE
## [211] TRUE TRUE
## [226] TRUE TRUE
```

```
#empty vector
vecs<-vector()
#Get all percentages
for (i in 1:length(Taxonomy)) {
  #print(sum(TaxEdit[, (i+5)]/sum(Taxonomy[, i]))
  vecs[i] <- sum(TaxEdit[, (i+5)]/sum(Taxonomy[, i])
}

range(vecs) #Nothings lost
```

```
## [1] 1 1
```

```
#Remove Human Diseases and Organismal Systems see recommendation by Tue in mail
TaxEdit <- filter(TaxEdit, !Level_1 == "Human Diseases" & !Level_1 == "Organismal Systems"
  & !Level_1 == "Brite Hierarchies")

##Percent lost from filtering
#Are they in sync
colnames(TaxEdit)[6:length(TaxEdit)]==colnames(Taxonomy)
```

```
## [1] TRUE TRUE
## [16] TRUE TRUE
## [31] TRUE TRUE
## [46] TRUE TRUE
## [61] TRUE TRUE
## [76] TRUE TRUE
## [91] TRUE TRUE
## [106] TRUE TRUE
## [121] TRUE TRUE
## [136] TRUE TRUE
## [151] TRUE TRUE
## [166] TRUE TRUE
## [181] TRUE TRUE
## [196] TRUE TRUE
## [211] TRUE TRUE
## [226] TRUE TRUE
```

```
#empty vector
vecs<-vector()
#Get all percentages
for (i in 1:length(Taxonomy)) {
  #print(sum(TaxEdit[, (i+5)]/sum(Taxonomy[, i]))
  vecs[i] <- sum(TaxEdit[, (i+5)]/sum(Taxonomy[, i])
}

range(vecs)
```

```
## [1] 0.9523525 0.9716654
```

```

#Aggregate the rows that have exactly the same entries and sum counts
Tax2<-TaxEdit %>% group_by(Level_1, Level_2, Genus) %>%
  summarise_if(is.numeric, funs(sum))

#Check if there are multiple entries of the same, change according to aggregation
if (sum(table(Tax2$Genus)>1)!=0) {
  stop("Need unique entries for all entities")
}

#Make feature table
Feature<-Tax2[,1:3]

##Include for all selections on how to handle NA
#Add Class as row names and keep numeric columns
#rownames(Tax2) <- Tax2$Class
Taxonomy<-data.frame(Tax2[,4:ncol(Tax2)], row.names = Tax2$Genus,
                    check.names=FALSE) #Change when having other taxonomy tables

##Filtering for DA analysis not relevant much fewer zeroes
#TaxonomyDA<-Taxonomy[length(Taxonomy)-rowSums(Taxonomy == 0) >= 120,]

#Add a categorical indicator of group in Metadata
Metadata$Diagnosis<-as.factor(ifelse(grepl("0", Metadata$group), "Control",
                                     ifelse(grepl("1", Metadata$group), "T1D",
                                             ifelse(grepl("2", Metadata$group), "T2D",
                                                     ifelse(grepl("4", Metadata$group),
                                                             "LADA", "wrong")))))

#table(Metadata$Diagnosis)
#Change order
#levels(as.factor(Metadata2$Diagnosis))
Metadata$Diagnosis<-ordered(Metadata$Diagnosis,
                           levels=c("Control", "T1D", "T2D", "LADA"))

if (setequal(colnames(Taxonomy), Metadata$MicrobiomeID)==FALSE) {
  stop("Taxonomy and Metadata does not have the same entries")
}

Metadata <- Metadata[match(colnames(Taxonomy), Metadata$MicrobiomeID),]

##Add categorical variable to metadata with Metformin
Metadata$Metformin <- ifelse(is.na(Metadata$Metformin), "Unknown", Metadata$Metformin)
##Consider recoding unknown metformin treatment as no treatment
Metadata$Metformin <- ifelse(Metadata$Metformin=="Unknown", "0", Metadata$Metformin)

#Create syntactically valid variable names
Metadata$MicrobiomeID <- paste("L", Metadata$MicrobiomeID, sep="")
colnames(Taxonomy) <- Metadata$MicrobiomeID

```

```

#Order Diagnosis
Metadata$Diagnosis<-ordered(Metadata$Diagnosis,
                             levels=c("Control", "T1D", "LADA", "T2D"))

##Removing age below 30 at diagnosis of LADA
age<-c("LLADA079", "LLADA085", "LLADA082", "LLADA063")
#Ageinfo<-Metadata[match(age, Metadata$MicrobiomeID), ]
Metadata<-Metadata[-match(age, Metadata$MicrobiomeID), ]
##Applying subsetting to OTU tables
Taxonomy<-dplyr::select(Taxonomy, one_of(as.character(Metadata$MicrobiomeID)))

##Removing LADA that were not tested positive for GAD
GAD<-c("LLADA090", "LLADA076", "LLADA095", "LLADA070", "LLADA080")
#GADinfo<-Metadata[match(GAD, Metadata$MicrobiomeID), ]
Metadata<-Metadata[-match(GAD, Metadata$MicrobiomeID), ]

##Removing LADA with insufficient metadata available (lacking C-peptide measurement)
Ins<-c("LLADA005")
#Insinfo<-Metadata[match(Ins, Metadata$MicrobiomeID), ]
Metadata<-Metadata[-match(Ins, Metadata$MicrobiomeID), ]

##Applying subsetting to OTU tables
Taxonomy<-dplyr::select(Taxonomy, one_of(as.character(Metadata$MicrobiomeID)))

##Remove orgs that are not present after subsetting.
Taxonomy <- Taxonomy[rowSums(Taxonomy)>0,]

length(Taxonomy)

## [1] 230

#Filtering at the beginning of script
TaxonomyDA<-Taxonomy[length(Taxonomy)-rowSums(Taxonomy == 0) >= length(Taxonomy)/2,]

mean(colSums(TaxonomyDA)/colSums(Taxonomy))

## [1] 0.9999999

sd(colSums(TaxonomyDA)/colSums(Taxonomy))

## [1] 1.090406e-06

range(colSums(TaxonomyDA)/colSums(Taxonomy))

## [1] 0.9999855 1.0000000

hist(colSums(TaxonomyDA)/colSums(Taxonomy))

```

## Histogram of colSums(TaxonomyDA)/colSums(Taxonomy)

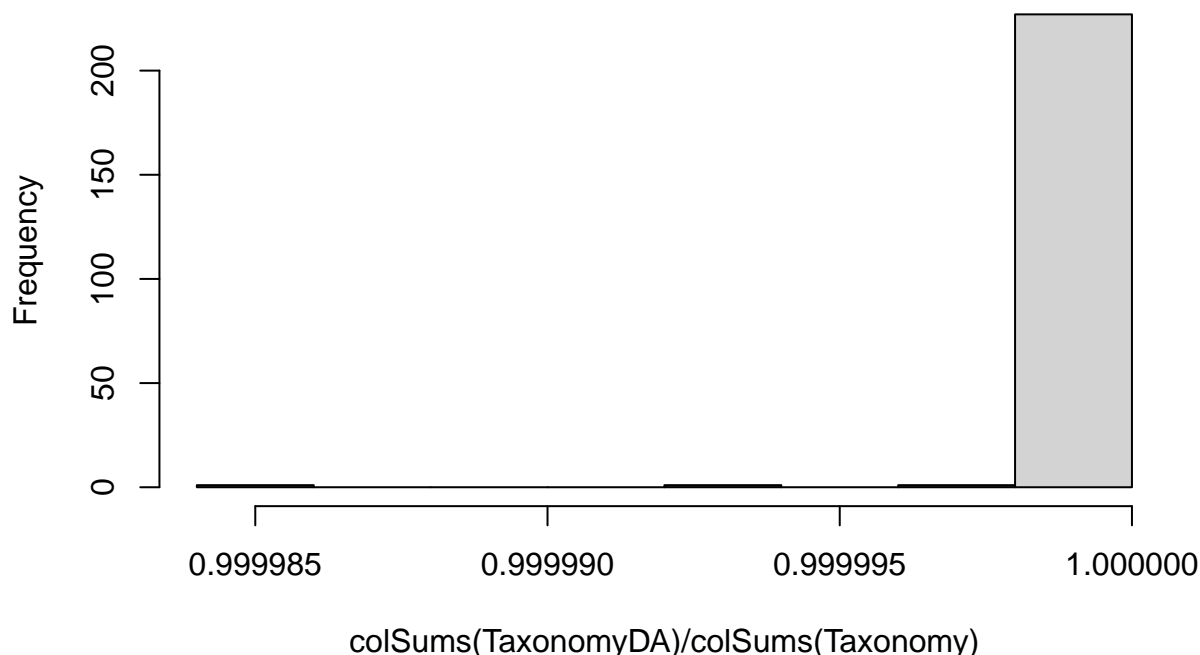

```
##Compared sample where many reads are removed due to 50% filtering
#samplebef<-select(Taxonomy, one_of("L606044"))
#samplefilter<-select(TaxonomyDA, one_of("L606044"))

##Used to provide medication overview
#write.table(Metadata, file="MetadataMedMerge.txt",
#           quote = F, row.names = F, sep="\t")

##See "StenoClean_LADA_Medication_CSP_220105.Rmd" for addition of medication
#Do not have information on medicine of controls
MetadataMed <- read.delim(file="../Metadata_Medication.txt",
                        check.names=FALSE,
                        stringsAsFactors = FALSE,
                        strip.white=TRUE)

#Encoding BMI
MetadataMed$BMIord <- ifelse(MetadataMed$BMI<18.5, "Under",
                            ifelse(MetadataMed$BMI>=18.5 & MetadataMed$BMI<25, "Normal",
                                    ifelse(MetadataMed$BMI>=25 & MetadataMed$BMI<30, "Over",
                                            ifelse(MetadataMed$BMI>=30 & MetadataMed$BMI<35, "Ob1",
                                                  ifelse(MetadataMed$BMI>=35 & MetadataMed$BMI<40, "Ob2",
                                                        ifelse(MetadataMed$BMI>=40, "Ob3",
                                                                "Other"))))))))
MetadataMed$BMIord <- ifelse(MetadataMed$BMI<18.5, "Under",
                            ifelse(MetadataMed$BMI>=18.5 & MetadataMed$BMI<25, "Normal",
                                    ifelse(MetadataMed$BMI>=25 & MetadataMed$BMI<30, "Over",
```

```

    ifelse(MetadataMed$BMI>=30 & MetadataMed$BMI<35, "Ob1",
    ifelse(MetadataMed$BMI>=35 & MetadataMed$BMI<40, "Ob2",
    ifelse(MetadataMed$BMI>=40, "Ob3",
    "Other")))))
table(Metadata$BMIord) #Based on this could make 3 classes

```

```

##
## Normal   Ob1    Ob2    Ob3   Over   Under
##      54    45    22     6   102    1

```

```

#table(MetadataMed$BMIord)
Metadata$BMIclass <- ifelse(Metadata$BMI<25, "Class1",
    ifelse(Metadata$BMI>=25 & Metadata$BMI<30, "Class2",
    ifelse(Metadata$BMI>=30, "Class3",
    "Other")))
MetadataMed$BMIclass <- ifelse(MetadataMed$BMI<25, "Class1",
    ifelse(MetadataMed$BMI>=25 & MetadataMed$BMI<30, "Class2",
    ifelse(MetadataMed$BMI>=30, "Class3",
    "Other")))
table(Metadata$BMIclass)

```

```

##
## Class1 Class2 Class3
##      55    102    73

```

```

Metadata$BMIordclass <- factor(ifelse(Metadata$BMI<25, 1,
    ifelse(Metadata$BMI>=25 & Metadata$BMI<30, 2,
    ifelse(Metadata$BMI>=30, 3,
    "Other"))))
MetadataMed$BMIordclass <- factor(ifelse(MetadataMed$BMI<25, 1,
    ifelse(MetadataMed$BMI>=25 & MetadataMed$BMI<30, 2,
    ifelse(MetadataMed$BMI>=30, 3,
    "Other"))))

```

```

#Quartiles
Metadata$BMIq <- as.numeric(cut_number(Metadata$BMI,4))
MetadataMed$BMIq <- as.numeric(cut_number(MetadataMed$BMI,4))
#table(Metadata$BMIq)

```

## Used colors throughout script

```

#install.packages("viridis")
#install.packages("colorBlindness")
#install.packages("RColorBrewer")
library(viridis)
library(colorBlindness)
library(RColorBrewer)
display.brewer.pal(n=8, "Dark2")
display.brewer.pal(n=9, "Set1")
display.brewer.pal(n=12, "Paired")

```

```

colorBlindness::displayAllColors(viridis::viridis(10))
colorBlindness::displayAllColors(rainbow(10))
colorBlindness::displayAllColors(brewer.pal(n=12, "Paired")) #Should be color blind friendly
colorBlindness::displayAllColors(brewer.pal(n=12, "Set1"))
colorBlindness::displayAllColors(brewer.pal(n=12, "Dark2")) #Should be color blind friendly
colorBlindness::displayAllColors(brewer.pal(n=12, "Set2"))

#From paired but adding Grey from Dark2. Using dark version for
brewer.pal(n=12, "Paired")
brewer.pal(n=12, "Dark2")
brewer.pal(n=12, "Set2")

##From Paired
##"#A6CEE3" Proteobacteria in functional Cellular Processes
##"#1F78B4" T1D
##"#B2DF8A" Firmicutes in functional Environmental Information Processing
##"#33A02C" T2D
##"#FB9A99" Bacteroidetes in functional Genetic Information Processing
##"#E31A1C" LADA
##"#FDBF6F" Actinobacteria in functional Metabolism
##"#FF7F00"
##"#CAB2D6" Euryarchaeota in functional Unclassified metabolism
##"#6A3D9A"
##"#FFFF99"
##"#B15928"

#From Dark2
##"#666666" Controls dark grey

#From Set2
##"#B3B3B3" Other light grey in functional also Other

colorBlindness::displayAllColors(c("#666666", "#1F78B4", "#E31A1C", "#33A02C",
                                   "#A6CEE3", "#B2DF8A", "#FB9A99", "#FDBF6F",
                                   "#CAB2D6", "#B3B3B3"))

```

Controls "#0000FF" Blue new "#666666" dark grey

T1D "#FF0000" Red new "#1F78B4" dark blue

T2D "#228B22" Green new "#33A02C" dark green LADA "#FFD700" Yellow new "#E31A1C" red

Cellular Processes "#3366CC" lightblue new "#005F6A" Petrol new "#A6CEE3" light blue

Genetic Information Processing "#DC3912" Redorange new "#9C58A1" Purple new "#FB9A99" pink

Metabolism "#FF9900" Yelloworange new "#EF9F26" Orange new "#ADD8E6" light blue new "#00FFFF"

Aqua new "#FDBF6F" orange Environmental Information Processing "#109618" Green new "#97D0A7"

Seafoam new "#B2DF8A" light green Unclassified metabolism "#DD4477" Pink new "#CAB2D6" light purple

Other "#B82E2E" Red new "#4C0013" Bordeaux new "#B3B3B3" light grey

Colors used from color brewer paired. The dark colors for diagnostic groups and light for the Level\_1 for instance in cca and vulcano plots. To represent controls a dark grey was used, a light grey was used for other Level\_1. LADA is deliberately red to draw the readers attention.

## Analysis

### Summary metadata, quality of data and ecology

Used to create table 1

```
rm(list=setdiff(ls(), c("Metadata", "MetadataMed", "Feature", "TaxonomyDA", "Taxonomy")))

##Summary metadata and quality of data
#Adding cell count to infer absolute cell numbers
# old path path<-paste("Q:/",
#       "Projects/",
#       "LADA/",
#       "LADA_Sandra_Evelina/",
#       "LADA_JKV/",
#       "LADA_R_AfterFlow_Analysis_FinalCounts/",
#       "LADA_FinalCounts/",
#       "2019-09-03_CountAnalysis.rds", sep="")

path <- paste("J:/",
              "CBMR/",
              "SUN-CBMR-Hansen-Group/",
              "Projects/",
              "LADA/",
              "LADA_Sandra_Evelina/",
              "LADA_JKV/",
              "LADA_R_AfterFlow_Analysis_FinalCounts/",
              "LADA_FinalCounts/",
              "2019-09-03_CountAnalysis.rds", sep="")

TotalCounts<-readRDS(path)
TotalCountsProcess <-
  data.frame(MicrobiomeID=TotalCounts$DF_Save_w$ID,
             CellNorm=TotalCounts$DF_Save_w$Cells_per_g_feces_FR_corrected_mean)
TotalCountsProcess$MicrobiomeID <- paste("L", TotalCountsProcess$MicrobiomeID,
                                         sep="")

covariates<-merge(Metadata, TotalCountsProcess, by="MicrobiomeID")

#One value is NaN in sample L602059 assigns value as average
covariates$CellNorm[is.nan(covariates$CellNorm)]<-
  mean(na.omit(covariates$CellNorm))

covariates<-merge(covariates, data.frame(seq_depth=colSums(Taxonomy),
                                       MicrobiomeID=names(Taxonomy)),
                 by="MicrobiomeID")
print("Sex: male=1, female=2")

## [1] "Sex: male=1, female=2"

table(Metadata$sex, Metadata$Diagnosis)

##
```



```
##      Control T1D LADA T2D
## 1      44 17 37 44
## 2      26 13 23 26
```

```
print("Metformin: No treatment=0, treatment=1")
```

```
## [1] "Metformin: No treatment=0, treatment=1"
```

```
table(Metadata$Metformin, Metadata$Diagnosis)
```

```
##
##      Control T1D LADA T2D
## 0      70 30 12 23
## 1      0 0 48 47
```

```
print("Age, BMI and seq_depth")
```

```
## [1] "Age, BMI and seq_depth"
```

```
aggregate(covariates[, c(2:3, 9:10)], list(covariates$Diagnosis), mean)
```

```
##  Group.1      age      BMI BMIord BMIclass
## 1 Control 61.44243 26.67011      NA      NA
## 2   T1D 51.73196 26.66011      NA      NA
## 3   LADA 63.76249 28.92226      NA      NA
## 4   T2D 61.42814 31.27686      NA      NA
```

```
aggregate(covariates[, c(2:3, 9:10)], list(covariates$Diagnosis), sd)
```

```
##  Group.1      age      BMI BMIord BMIclass
## 1 Control 10.189143 3.722805      NA      NA
## 2   T1D 6.961407 4.555865      NA      NA
## 3   LADA 10.183290 4.866525      NA      NA
## 4   T2D 9.956564 5.512931      NA      NA
```

```
##Look into metadata if patient received metformin or not
```

```
print("Sex: male=1, female=2. Metformin: No treatment=0, treatment=1")
```

```
## [1] "Sex: male=1, female=2. Metformin: No treatment=0, treatment=1"
```

```
table(Metadata$sex, Metadata$Metformin)
```

```
##
##      0 1
## 1 78 64
## 2 57 31
```

```
print("Age, BMI and seq_depth")
```

```
## [1] "Age, BMI and seq_depth"
```

```
aggregate(covariates[, c(2:3, 9:10)], list(covariates$Metformin), mean)
```

```
##   Group.1   age      BMI BMIord BMIclass
## 1      0 60.12622 27.62709    NA      NA
## 2      1 61.70115 30.12390    NA      NA
```

```
aggregate(covariates[, c(2:3, 9:10)], list(covariates$Metformin), sd)
```

```
##   Group.1   age      BMI BMIord BMIclass
## 1      0 10.57613 4.706784    NA      NA
## 2      1 10.02674 5.276407    NA      NA
```

```
##Testing covariates
```

```
#Kruskal test
```

```
kruskal.test(BMI ~ Diagnosis, data=covariates)
```

```
##
```

```
## Kruskal-Wallis rank sum test
```

```
##
```

```
## data: BMI by Diagnosis
```

```
## Kruskal-Wallis chi-squared = 37.354, df = 3, p-value = 3.872e-08
```

```
kruskal.test(age ~ Diagnosis, data=covariates)
```

```
##
```

```
## Kruskal-Wallis rank sum test
```

```
##
```

```
## data: age by Diagnosis
```

```
## Kruskal-Wallis chi-squared = 31.529, df = 3, p-value = 6.576e-07
```

```
kruskal.test(CellNorm ~ Diagnosis, data=covariates)
```

```
##
```

```
## Kruskal-Wallis rank sum test
```

```
##
```

```
## data: CellNorm by Diagnosis
```

```
## Kruskal-Wallis chi-squared = 1.7778, df = 3, p-value = 0.6198
```

```
kruskal.test(seq_depth ~ Diagnosis, data=covariates)
```

```
##
```

```
## Kruskal-Wallis rank sum test
```

```
##
```

```
## data: seq_depth by Diagnosis
```

```
## Kruskal-Wallis chi-squared = 0.56799, df = 3, p-value = 0.9037
```

```
#If significant Mann-Whitney pairwise post-test
pairwise.wilcox.test(covariates$BMI, covariates$Diagnosis,
                    p.adjust.method="bonferroni")
```

```
##
## Pairwise comparisons using Wilcoxon rank sum test with continuity correction
##
## data: covariates$BMI and covariates$Diagnosis
##
##      Control T1D      LADA
## T1D  1.00000 -          -
## LADA 0.03204 0.15124 -
## T2D  1e-07  0.00024 0.04139
##
## P value adjustment method: bonferroni
```

```
pairwise.wilcox.test(covariates$age, covariates$Diagnosis,
                    p.adjust.method="bonferroni")
```

```
##
## Pairwise comparisons using Wilcoxon rank sum test with continuity correction
##
## data: covariates$age and covariates$Diagnosis
##
##      Control T1D      LADA
## T1D  1.1e-05 -          -
## LADA 1          8.7e-07 -
## T2D  1          1.8e-05 1
##
## P value adjustment method: bonferroni
```

```
pairwise.wilcox.test(covariates$seq_depth, covariates$Diagnosis,
                    p.adjust.method="bonferroni")
```

```
##
## Pairwise comparisons using Wilcoxon rank sum test with continuity correction
##
## data: covariates$seq_depth and covariates$Diagnosis
##
##      Control T1D LADA
## T1D  1          -   -
## LADA 1          1   -
## T2D  1          1   1
##
## P value adjustment method: bonferroni
```

```
##Plot rarefaction curves can decrease step for final plotting
#set.seed(1)
#rarecurve(t(Taxonomy), step=100, xlab="Annotated reads",
#          ylab="Genera", label=FALSE)
```

```

#Create rarefaction curves with colors according to categories
#Adding colors to the rarecurves according to experiment, Controls=#666666 (blue),
#T1D=#1F78B4 (red), T2D=#33A02C (forestgreen), LADA=#E31A1C (gold)
rare<-data.frame(t(Taxonomy))
rare<-add_rownames(rare, "MicrobiomeID")
rare<-merge(rare, Metadata, by="MicrobiomeID")
rare$colors<-ifelse(grepl("0", rare$group), "#666666",
                    ifelse(grepl("1", rare$group), "#1F78B4",
                            ifelse(grepl("2", rare$group), "#33A02C",
                                    ifelse(grepl("4", rare$group),
                                            "#E31A1C", "pink")))))
#table(rare$colors)
rare$line<-ifelse(grepl("0", rare$Metformin), "solid",
                  ifelse(grepl("1", rare$Metformin), "dotted", "longdash"))
#table(rare$line)

#Check order
if (setequal(colnames(Taxonomy), rare$MicrobiomeID)==FALSE) {
  stop("Taxonomy and Metadata is not corresponding with each other")
}

set.seed(1)
rarecurve(t(Taxonomy), step=100000, xlab="Annotated reads", ylab="Genera",
          col=rare$colors,
          lty=rare$line, label=FALSE) #pipillin pathways 100000, else 100

```

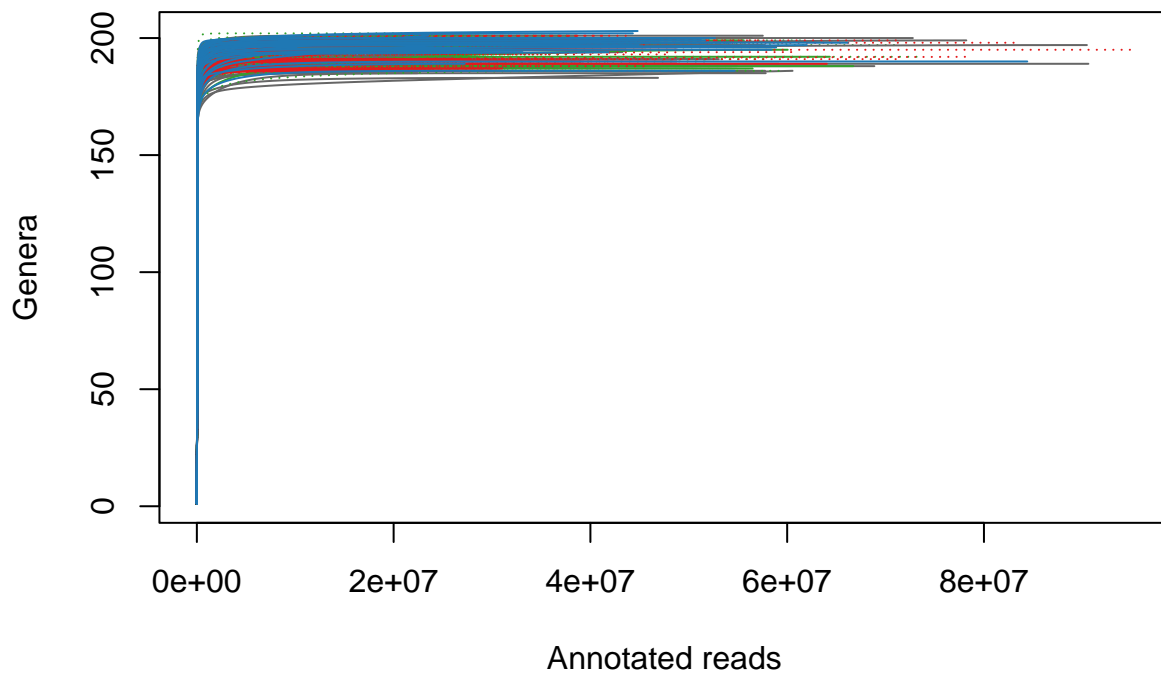

```
pdf(paste("MicroLADA_Rarecurve_Func.pdf", sep=""), height=6, width=8)
rarecurve(t(Taxonomy), step=100000, xlab="Annotated reads", ylab="Genera",
          col=rare$colors,
          lty=rare$line, label=FALSE)
dev.off()
```

```
## pdf
## 2
```

```
##Rank abundance curves
#Total sum scaling (Use relative abundances)
Taxonomy2<-sweep(Taxonomy, 2, colSums(Taxonomy), FUN="/")

##RAC all and diagnostic groupings
pdf(paste("MicroLADA_RAC_Func", ".pdf", sep=""), width=12, height=6)
par(mfrow=c(1,5))
Subset <- c("All", "Control", "T1D", "LADA", "T2D")

for (i in Subset) {
  #Subsetting Metadata according to
  if (i=="All") {
    Metadata2 <- Metadata
  } else if (i=="Control") {
    Metadata2<-filter(Metadata, Diagnosis == "Control")
  } else if (i=="T1D") {
    Metadata2<-filter(Metadata, Diagnosis == "T1D")
  } else if (i=="LADA") {
    Metadata2<-filter(Metadata, Diagnosis == "LADA")
  } else if (i=="T2D") {
    Metadata2<-filter(Metadata, Diagnosis == "T2D")
  } else {
    print("Subset defined not valid")
  }

  #Applying subsetting to OTU tables, have already TSS
  Taxonomy3<-dplyr::select(Taxonomy2, one_of(as.character(Metadata2$MicrobiomeID)))
  #Setting up ranks
  RankAbun.1 <- rankabundance(t(Taxonomy3))
  #Create RACplot
  rankabunplot(RankAbun.1, scale='proportion', addit=FALSE, specnames=c(1,2,3,4,5),
              xlim=c(0,60), main=i)
}
dev.off()
```

```
## pdf
## 2
```

```
#Include in pdf
Subset <- c("All", "Control", "T1D", "LADA", "T2D")
for (i in Subset) {
  #Subsetting Metadata according to
  if (i=="All") {
```

```

Metadata2 <- Metadata
} else if (i=="Control") {
  Metadata2<-filter(Metadata, Diagnosis == "Control")
} else if (i=="T1D") {
  Metadata2<-filter(Metadata, Diagnosis == "T1D")
} else if (i=="LADA") {
  Metadata2<-filter(Metadata, Diagnosis == "LADA")
} else if (i=="T2D") {
  Metadata2<-filter(Metadata, Diagnosis == "T2D")
} else {
  print("Subset defined not valid")
}

#Applying subsetting to OTU tables, have already TSS
Taxonomy3<-dplyr::select(Taxonomy2, one_of(as.character(Metadata2$MicrobiomeID)))
#Setting up ranks
RankAbun.1 <- rankabundance(t(Taxonomy3))
#Create RACplot
rankabunplot(RankAbun.1, scale='proportion', addit=FALSE, specnames=c(1,2,3,4,5),
             xlim=c(0,60), main=i)
}

```

## All

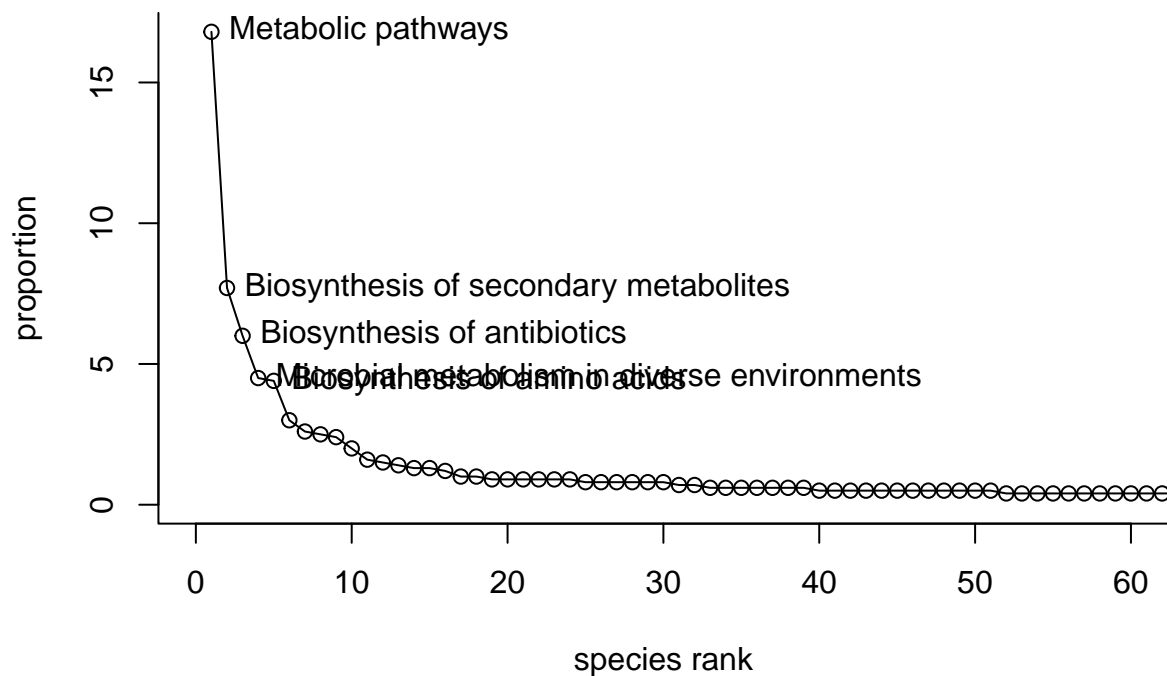

# Control

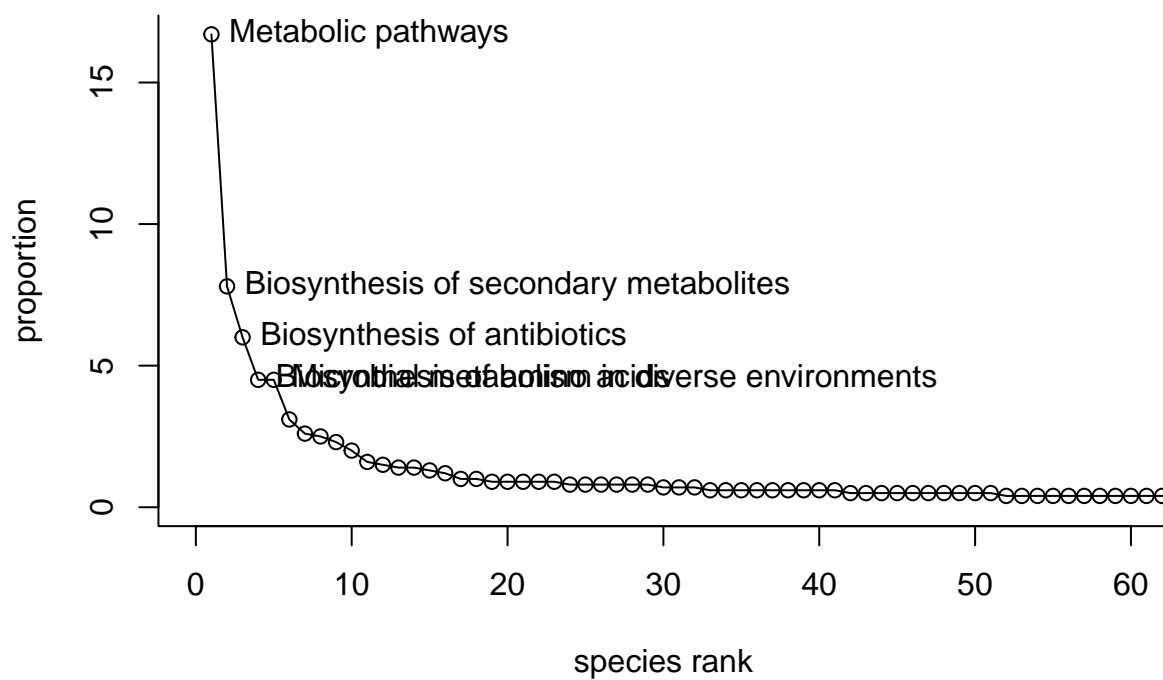

# T1D

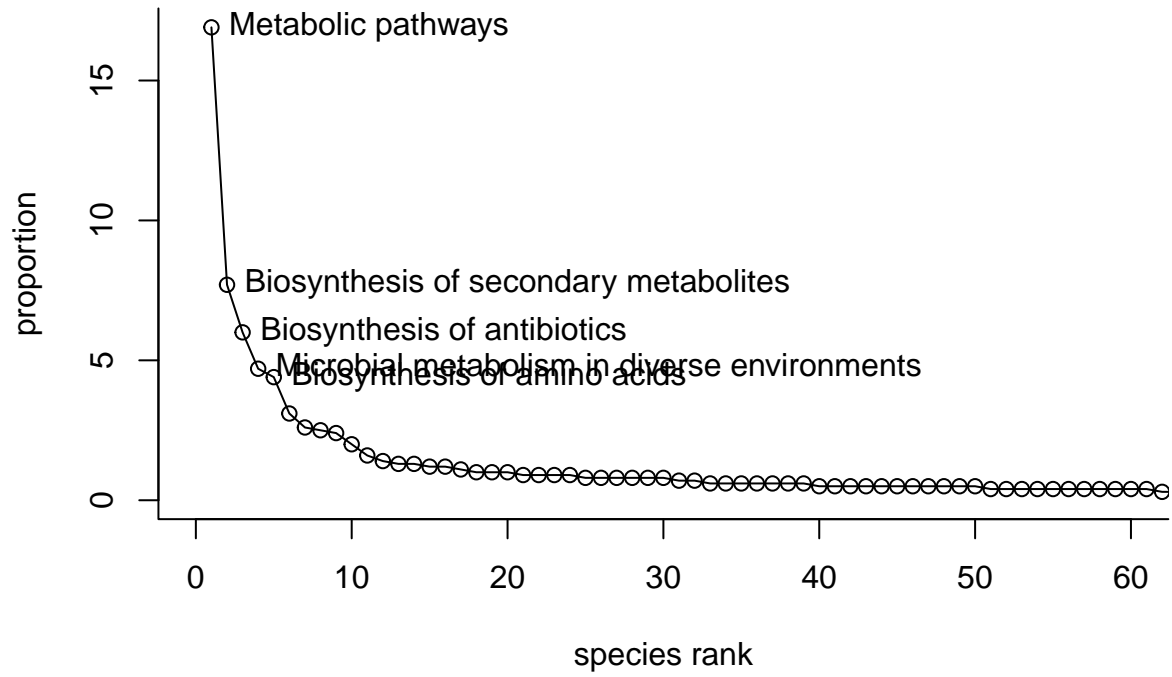



# LADA

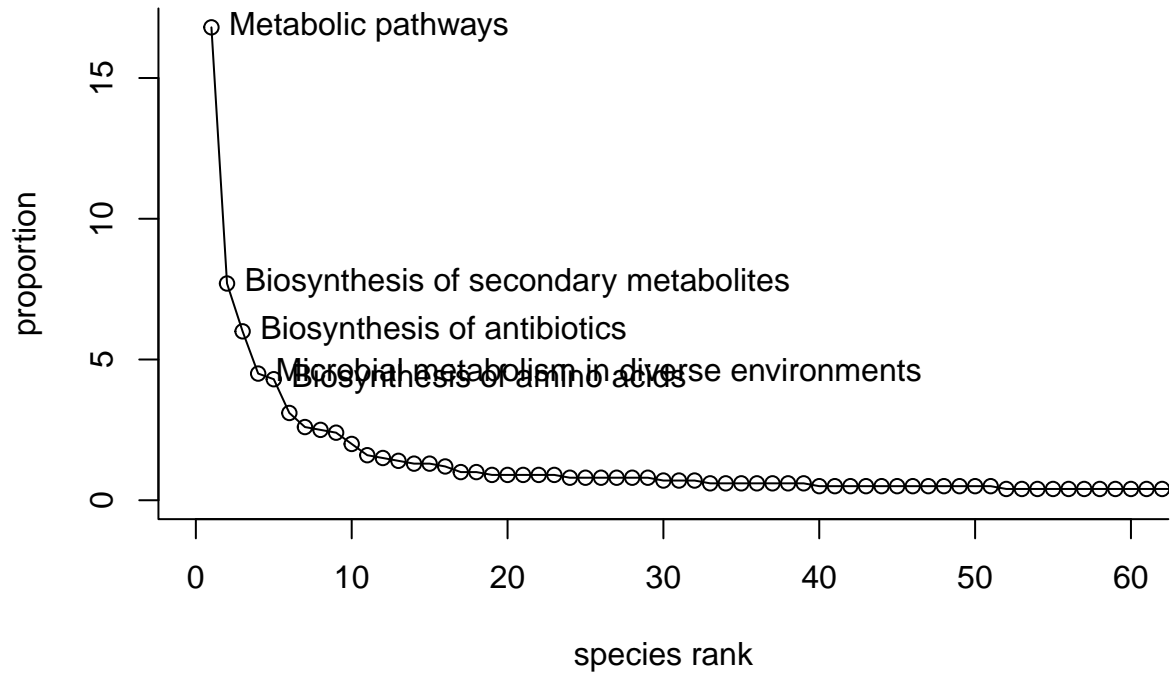

## T2D

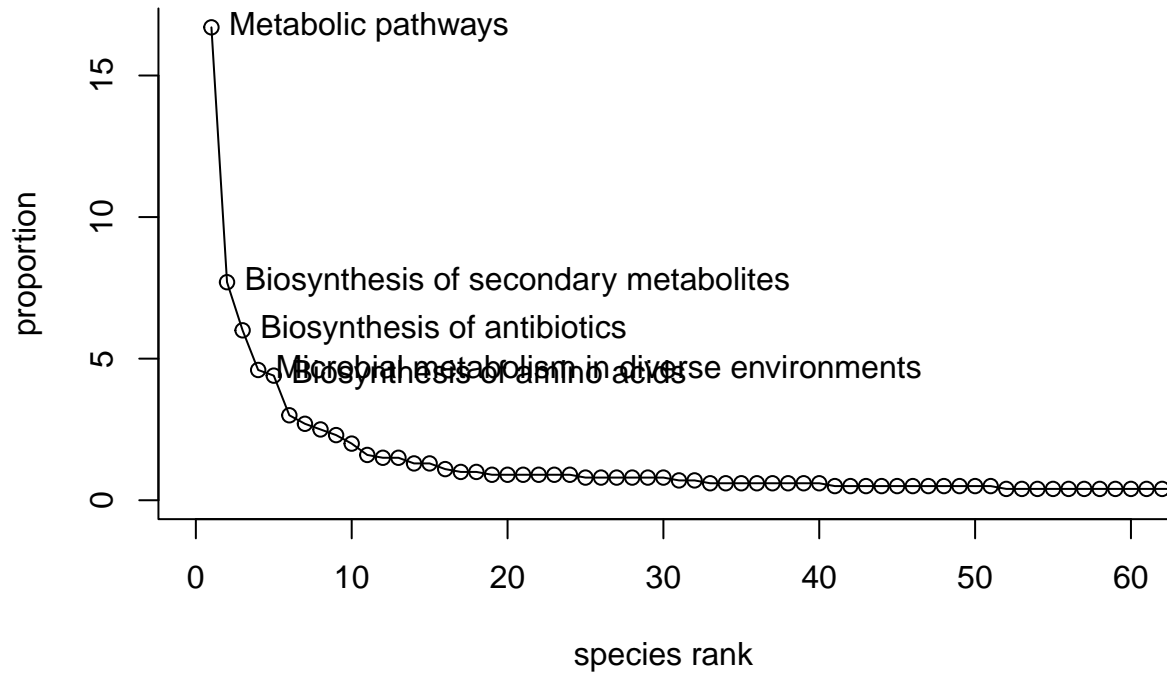

```
#Additional metadata
MetadataEkstra <- read.csv(file="P:/CBMR/LADA/Text/Analysis/LADA_microbiome_extra_metadata.txt",
                           check.names=FALSE,
                           stringsAsFactors = FALSE,
                           strip.white=TRUE,
                           dec=".")

MetadataEkstra$MicrobiomeID <- paste("L", MetadataEkstra$MicrobiomeID,
                                     sep="")

#Merge with previous metadata
covariates <- merge(covariates, MetadataEkstra[,c(1,12:length(MetadataEkstra))])

#Aggregate diagnosis mean and sd
aggregate(covariates[, c(2:3, 12:length(covariates))], list(covariates$Diagnosis), mean,
          na.rm=TRUE)
```

```
##   Group.1   age    BMI    BMIq   CellNorm seq_depth   waist   hip
## 1 Control 61.44243 26.67011 2.042857 20384275367 40742480 92.89714 101.4143
## 2   T1D 51.73196 26.66011 2.066667 18731782275 42304822 98.30000 106.1833
## 3   LADA 63.76249 28.92226 2.583333 18940404238 41155438 103.21667 107.3333
## 4   T2D 61.42814 31.27686 3.071429 19624620327 41285784 107.45588 107.6324
##      whr      sbp      dbp hba1c_pct hba1c_mmol_mol      glu      chol
## 1 0.9160348 135.7643 81.03571 5.674286      38.47143 5.765714 5.444286
## 2 0.9241084 137.3500 75.98333 8.853333      73.26073 9.740000 4.860000
```

```
## 3 0.9602380 131.6278 77.80556 7.920580 63.06667 8.803333 4.201667
## 4 0.9978302 136.1159 79.89130 6.867143 51.55365 8.477941 4.651429
##      hdl      ldl      trig
## 1 1.369286 3.470000 1.344857
## 2 1.406333 2.703448 1.364333
## 3 1.331833 2.057627 1.729167
## 4 1.210429 2.537879 1.954857
```

```
aggregate(covariates[, c(2:3, 12:length(covariates))], list(covariates$Diagnosis), sd,
          na.rm=TRUE)
```

```
##   Group.1      age      BMI      BMIq CellNorm seq_depth  waist  hip
## 1 Control 10.189143 3.722805 0.9696214 6781846681 17614052 10.80459 7.671692
## 2   T1D  6.961407 4.555865 1.2015316 5712095609 15783770 12.71206 7.790891
## 3   LADA 10.183290 4.866525 1.1393079 5544046390 16729647 14.49148 9.553891
## 4   T2D  9.956564 5.512931 0.9528208 6146706989 12799787 13.53319 9.787144
##      whr      sbp      dbp hba1c_pct hba1c_mmol_mol      glu      chol
## 1 0.08380676 18.33301 10.241052 0.3561817 3.907338 0.4845095 1.126574
## 2 0.08055011 21.20026 10.346150 0.8076075 8.826342 4.2322734 1.324725
## 3 0.09391664 17.78699 7.853962 1.1954893 13.065502 2.9649916 1.019054
## 4 0.08120027 16.47573 10.378098 1.2696823 13.876358 2.7289408 1.343017
##      hdl      ldl      trig
## 1 0.3772260 1.0489954 0.8167996
## 2 0.4137422 0.7248068 0.9030855
## 3 0.3909939 0.7788593 1.0163315
## 4 0.3592038 1.0221794 1.2446846
```

```
#Aggregate sex mean and sd
```

```
aggregate(covariates[, c(2:3, 12:length(covariates))], list(covariates$sex), mean,
          na.rm=TRUE)
```

```
##   Group.1      age      BMI      BMIq CellNorm seq_depth  waist  hip
## 1      1 59.92969 28.55643 2.464789 20272037367 40593799 103.06549 103.8380
## 2      2 62.14355 28.82288 2.556818 18413308125 42228749 96.70349 108.1221
##      whr      sbp      dbp hba1c_pct hba1c_mmol_mol      glu      chol
## 1 0.9906106 135.4178 80.06338 7.048703 53.54204 7.912857 4.645775
## 2 0.8912291 134.3027 77.74521 7.020671 53.18873 7.871591 5.055682
##      hdl      ldl      trig
## 1 1.228028 2.644928 1.692183
## 2 1.457955 2.851163 1.538295
```

```
aggregate(covariates[, c(2:3, 12:length(covariates))], list(covariates$sex), sd,
          na.rm=TRUE)
```

```
##   Group.1      age      BMI      BMIq CellNorm seq_depth  waist  hip
## 1      1 10.32654 4.689904 1.108714 6154527421 14646643 12.78662 7.423021
## 2      2 10.32517 5.701434 1.153286 5972255901 17323338 15.37737 11.148710
##      whr      sbp      dbp hba1c_pct hba1c_mmol_mol      glu      chol
## 1 0.07681929 16.90142 9.60506 1.469174 16.05979 2.926826 1.198499
## 2 0.07928849 19.87744 10.05909 1.503488 16.46194 3.134126 1.375973
##      hdl      ldl      trig
## 1 0.3401986 1.056925 1.1107317
## 2 0.4118005 1.116164 0.9472746
```

```

#Test differences
df<-data.frame()
for (i in c(2:3, 12:length(covariates))) {
  design<-paste(colnames(covariates[i]), "~ Diagnosis")
  #Run kruskal-wallis test
  kwoject<-kruskal.test(formula(design), data=covariates)
  #print(kwoject)
  #Run follow up mann-whitney
  mwobject<-pairwise.wilcox.test(covariates[,i], covariates[,8],
                                p.adjust.method="bonferroni")
  #print(mwobject)
  #Bind all test
  df<-rbind(df, data.frame(kwoject$data.name, kwoject$statistic, kwoject$p.value,
                          mwobject$p.value[1,1], mwobject$p.value[2,1], mwobject$p.value[3,1],
                          mwobject$p.value[2,2], mwobject$p.value[3,2], mwobject$p.value[3,3]))
}

colnames(df)<-c("Design", "chistat", "kw p-value (p)", "mw p control vs T1D",
              "mw p control vs LADA", "mw p control vs T2D", "mw p T1D vs LADA",
              "mw p-value T1D vs T2D","mw p-value LADA vs T2D")
kable(df[, 1:5], row.names=FALSE)

```

| Design                      | chistat     | kw p-value (p) | mw p control vs T1D | mw p control vs LADA |
|-----------------------------|-------------|----------------|---------------------|----------------------|
| age by Diagnosis            | 31.5293376  | 0.0000007      | 0.0000109           | 1.0000000            |
| BMI by Diagnosis            | 37.3541663  | 0.0000000      | 1.0000000           | 0.0320433            |
| BMIq by Diagnosis           | 34.4233168  | 0.0000002      | 1.0000000           | 0.0397857            |
| CellNorm by Diagnosis       | 1.7778215   | 0.6197731      | 1.0000000           | 1.0000000            |
| seq_depth by Diagnosis      | 0.5679933   | 0.9037189      | 1.0000000           | 1.0000000            |
| waist by Diagnosis          | 41.5179712  | 0.0000000      | 0.5295941           | 0.0001757            |
| hip by Diagnosis            | 22.4643067  | 0.0000522      | 0.0206165           | 0.0015338            |
| whr by Diagnosis            | 29.2167844  | 0.0000020      | 1.0000000           | 0.0531195            |
| sbp by Diagnosis            | 3.2759069   | 0.3510101      | 1.0000000           | 0.8702673            |
| dbp by Diagnosis            | 7.5642457   | 0.0559305      | 0.1759817           | 0.1800562            |
| hba1c_pct by Diagnosis      | 158.0896156 | 0.0000000      | 0.0000000           | 0.0000000            |
| hba1c_mmol_mol by Diagnosis | 157.7230843 | 0.0000000      | 0.0000000           | 0.0000000            |
| glu by Diagnosis            | 95.3261632  | 0.0000000      | 0.0000018           | 0.0000000            |
| chol by Diagnosis           | 40.8475487  | 0.0000000      | 0.0137855           | 0.0000000            |
| hdl by Diagnosis            | 10.8681667  | 0.0124605      | 1.0000000           | 1.0000000            |
| ldl by Diagnosis            | 57.7554562  | 0.0000000      | 0.0011958           | 0.0000000            |
| trig by Diagnosis           | 20.3044253  | 0.0001468      | 1.0000000           | 0.0502674            |

```
kable(df[, c(1, 6:9)], row.names=FALSE)
```

| Design                | mw p control vs T2D | mw p T1D vs LADA | mw p-value T1D vs T2D | mw p-value LADA vs T2D |
|-----------------------|---------------------|------------------|-----------------------|------------------------|
| age by Diagnosis      | 1.0000000           | 0.0000009        | 0.0000177             | 1.0000000              |
| BMI by Diagnosis      | 0.0000001           | 0.1512350        | 0.0002367             | 0.0413942              |
| BMIq by Diagnosis     | 0.0000001           | 0.2511605        | 0.0008957             | 0.0857981              |
| CellNorm by Diagnosis | 1.0000000           | 1.0000000        | 1.0000000             | 1.0000000              |

| Design                      | mw p control vs T2D | mw p T1D vs LADA | mw p-value T1D vs T2D | mw p-value LADA vs T2D |
|-----------------------------|---------------------|------------------|-----------------------|------------------------|
| seq_depth by Diagnosis      | 1.0000000           | 1.0000000        | 1.0000000             | 1.0000000              |
| waist by Diagnosis          | 0.0000000           | 0.5796713        | 0.0157666             | 0.9439178              |
| hip by Diagnosis            | 0.0001607           | 1.0000000        | 1.0000000             | 1.0000000              |
| whr by Diagnosis            | 0.0000026           | 0.4417814        | 0.0009814             | 0.2648907              |
| sbp by Diagnosis            | 1.0000000           | 1.0000000        | 1.0000000             | 0.6594205              |
| dbp by Diagnosis            | 1.0000000           | 1.0000000        | 0.4748683             | 1.0000000              |
| hba1c_pct by Diagnosis      | 0.0000000           | 0.0000212        | 0.0000000             | 0.0000000              |
| hba1c_mmol_mol by Diagnosis | 0.0000000           | 0.0000212        | 0.0000000             | 0.0000000              |
| glu by Diagnosis            | 0.0000000           | 0.9620485        | 0.3009942             | 1.0000000              |
| chol by Diagnosis           | 0.0003009           | 0.0396162        | 1.0000000             | 0.7831524              |
| hdl by Diagnosis            | 0.0212935           | 1.0000000        | 0.0887728             | 0.2690728              |
| ldl by Diagnosis            | 0.0000060           | 0.0032265        | 0.6392474             | 0.1175232              |
| trig by Diagnosis           | 0.0005226           | 0.1705718        | 0.0098608             | 1.0000000              |

#### *#Diagnostic criteria*

```
T1D<-filter(covariates, Diagnosis=="T1D")
range(T1D$hba1c_pct)
```

```
## [1] 7.6 11.0
```

```
Controls<-filter(covariates, Diagnosis=="Control")
range(Controls$glu)
```

```
## [1] 4.2 6.8
```

```
range(Controls$hba1c_pct)
```

```
## [1] 4.8 6.2
```

#### Summary metadata, quality of data and ecology Metformin removed

```
rm(list=setdiff(ls(), c("Metadata", "MetadataMed", "Feature", "TaxonomyDA", "Taxonomy")))
##Removing treated with metformin
#Metadata$Metformin <- ifelse(is.na(Metadata$Metformin), "Unknow", Metadata$Metformin)
Metadata2<-filter(Metadata, !Metformin == 1)
##Applying subsetting to OTU tables
Taxonomy2<-dplyr::select(Taxonomy, one_of(as.character(Metadata2$MicrobiomeID)))
##Remove orgs that are not present after subsetting.
Taxonomy2 <- Taxonomy2[rowSums(Taxonomy2)>0,]

##Summary metadata and quality of data
#Adding cell count to infer absolute cell numbers
# old path path<-paste("Q:/",
#                       "Projects/",
#                       "LADA/",
```

```

#         "LADA_Sandra_Evelina/",
#         "LADA_JKV/",
#         "LADA_R_AfterFlow_Analysis_FinalCounts/",
#         "LADA_FinalCounts/",
#         "2019-09-03_CountAnalysis.rds", sep="")

path <- paste("J:/",
             "CBMR/",
             "SUN-CBMR-Hansen-Group/",
             "Projects/",
             "LADA/",
             "LADA_Sandra_Evelina/",
             "LADA_JKV/",
             "LADA_R_AfterFlow_Analysis_FinalCounts/",
             "LADA_FinalCounts/",
             "2019-09-03_CountAnalysis.rds", sep="")

TotalCounts<-readRDS(path)
TotalCountsProcess <-
  data.frame(MicrobiomeID=TotalCounts$DF_Save_w$ID,
             CellNorm=TotalCounts$DF_Save_w$Cells_per_g_feces_FR_corrected_mean)
TotalCountsProcess$MicrobiomeID <- paste("L", TotalCountsProcess$MicrobiomeID,
                                         sep="")
covariates<-merge(Metadata2, TotalCountsProcess, by="MicrobiomeID")

#One value is NaN in sample L602059 assigns value as average
covariates$CellNorm[is.nan(covariates$CellNorm)]<-
  mean(na.omit(covariates$CellNorm))

covariates<-merge(covariates, data.frame(seq_depth=colSums(Taxonomy2),
                                         MicrobiomeID=names(Taxonomy2)),
                 by="MicrobiomeID")
print("Sex: male=1, female=2")

```

```
## [1] "Sex: male=1, female=2"
```

```
table(Metadata2$sex, Metadata2$Diagnosis)
```

```
##
##      Control T1D LADA T2D
##  1         44  17   5  12
##  2         26  13   7  11
```

```
print("Metformin: No treatment=0, treatment=1")
```

```
## [1] "Metformin: No treatment=0, treatment=1"
```

```
table(Metadata2$Metformin, Metadata2$Diagnosis)
```

```
##
##      Control T1D LADA T2D
##  0         70  30  12  23
```

```
print("Age, BMI and seq_depth")
```

```
## [1] "Age, BMI and seq_depth"
```

```
aggregate(covariates[, c(2:3, 9:10)], list(covariates$Diagnosis), mean)
```

```
##   Group.1      age      BMI BMIord BMIclass
## 1 Control 61.44243 26.67011     NA      NA
## 2      T1D 51.73196 26.66011     NA      NA
## 3      LADA 66.61670 28.20713     NA      NA
## 4      T2D 63.68304 31.49826     NA      NA
```

```
aggregate(covariates[, c(2:3, 9:10)], list(covariates$Diagnosis), sd)
```

```
##   Group.1      age      BMI BMIord BMIclass
## 1 Control 10.189143 3.722805     NA      NA
## 2      T1D  6.961407 4.555865     NA      NA
## 3      LADA 12.720776 5.022780     NA      NA
## 4      T2D  8.549262 5.608501     NA      NA
```

```
##Look into metadata if patient received metformin or not
```

```
print("Sex: male=1, female=2. Metformin: No treatment=0, treatment=1")
```

```
## [1] "Sex: male=1, female=2. Metformin: No treatment=0, treatment=1"
```

```
table(Metadata2$sex, Metadata2$Metformin)
```

```
##
##      0
## 1 78
## 2 57
```

```
print("Age, BMI and seq_depth")
```

```
## [1] "Age, BMI and seq_depth"
```

```
aggregate(covariates[, c(2:3, 9:10)], list(covariates$Metformin), mean)
```

```
##   Group.1      age      BMI BMIord BMIclass
## 1      0 60.12622 27.62709     NA      NA
```

```
aggregate(covariates[, c(2:3, 9:10)], list(covariates$Metformin), sd)
```

```
##   Group.1      age      BMI BMIord BMIclass
## 1      0 10.57613 4.706784     NA      NA
```

```

##Testing covariates
#Kruskal test
kruskal.test(BMI ~ Diagnosis, data=covariates)

##
## Kruskal-Wallis rank sum test
##
## data: BMI by Diagnosis
## Kruskal-Wallis chi-squared = 16.525, df = 3, p-value = 0.0008847

kruskal.test(age ~ Diagnosis, data=covariates)

##
## Kruskal-Wallis rank sum test
##
## data: age by Diagnosis
## Kruskal-Wallis chi-squared = 30.881, df = 3, p-value = 9.006e-07

kruskal.test(CellNorm ~ Diagnosis, data=covariates)

##
## Kruskal-Wallis rank sum test
##
## data: CellNorm by Diagnosis
## Kruskal-Wallis chi-squared = 9.1305, df = 3, p-value = 0.02761

kruskal.test(seq_depth ~ Diagnosis, data=covariates)

##
## Kruskal-Wallis rank sum test
##
## data: seq_depth by Diagnosis
## Kruskal-Wallis chi-squared = 1.0785, df = 3, p-value = 0.7823

#If significant Mann-Whitney pairwise post-test
pairwise.wilcox.test(covariates$BMI, covariates$Diagnosis,
                    p.adjust.method="bonferroni")

##
## Pairwise comparisons using Wilcoxon rank sum test with continuity correction
##
## data: covariates$BMI and covariates$Diagnosis
##
##      Control T1D      LADA
## T1D  1.00000 -          -
## LADA 1.00000 1.00000 -
## T2D  0.00059 0.00504 0.68860
##
## P value adjustment method: bonferroni

```



```
pairwise.wilcox.test(covariates$age, covariates$Diagnosis,  
                    p.adjust.method="bonferroni")
```

```
##  
## Pairwise comparisons using Wilcoxon rank sum test with continuity correction  
##  
## data: covariates$age and covariates$Diagnosis  
##  
##      Control T1D      LADA  
## T1D  1.1e-05 -      -  
## LADA 0.79832 0.00057 -  
## T2D  1.00000 7.8e-06 1.00000  
##  
## P value adjustment method: bonferroni
```

```
pairwise.wilcox.test(covariates$seq_depth, covariates$Diagnosis,  
                    p.adjust.method="bonferroni")
```

```
##  
## Pairwise comparisons using Wilcoxon rank sum test with continuity correction  
##  
## data: covariates$seq_depth and covariates$Diagnosis  
##  
##      Control T1D LADA  
## T1D  1      -      -  
## LADA 1      1      -  
## T2D  1      1      1  
##  
## P value adjustment method: bonferroni
```

```
##Plot rarefaction curves can decrease step for final plotting  
#set.seed(1)  
#rarecurve(t(Taxonomy), step=100, xlab="Annotated reads",  
# ylab="Genera", label=FALSE)  
  
#Create rarefaction curves with colors according to categories  
#Adding colors to the rarecurves according to experiment, Controls=#666666 (blue),  
#T1D=#1F78B4 (red), T2D=#33A02C (forestgreen), LADA=#E31A1C (gold)  
rare<-data.frame(t(Taxonomy2))  
rare<-add_rownames(rare, "MicrobiomeID")  
rare<-merge(rare, Metadata2, by="MicrobiomeID")  
rare$colors<-ifelse(grepl("0", rare$group), "#666666",  
                    ifelse(grepl("1", rare$group), "#1F78B4",  
                            ifelse(grepl("2", rare$group), "#33A02C",  
                                    ifelse(grepl("4", rare$group),  
                                            "#E31A1C", "pink")))))  
#table(rare$colors)  
rare$line<-ifelse(grepl("0", rare$Metformin), "solid",  
                 ifelse(grepl("1", rare$Metformin), "dotted", "longdash"))  
#table(rare$line)  
  
#Check order
```

```

if (setequal(colnames(Taxonomy2), rare$MicrobiomeID)==FALSE) {
  stop("Taxonomy and Metadata is not corresponding with each other")
}

set.seed(1)
rarecurve(t(Taxonomy2), step=100000, xlab="Annotated reads", ylab="Genera",
          col=rare$colors,
          lty=rare$line, label=FALSE) #piphillin pathways 100000, else 100

```

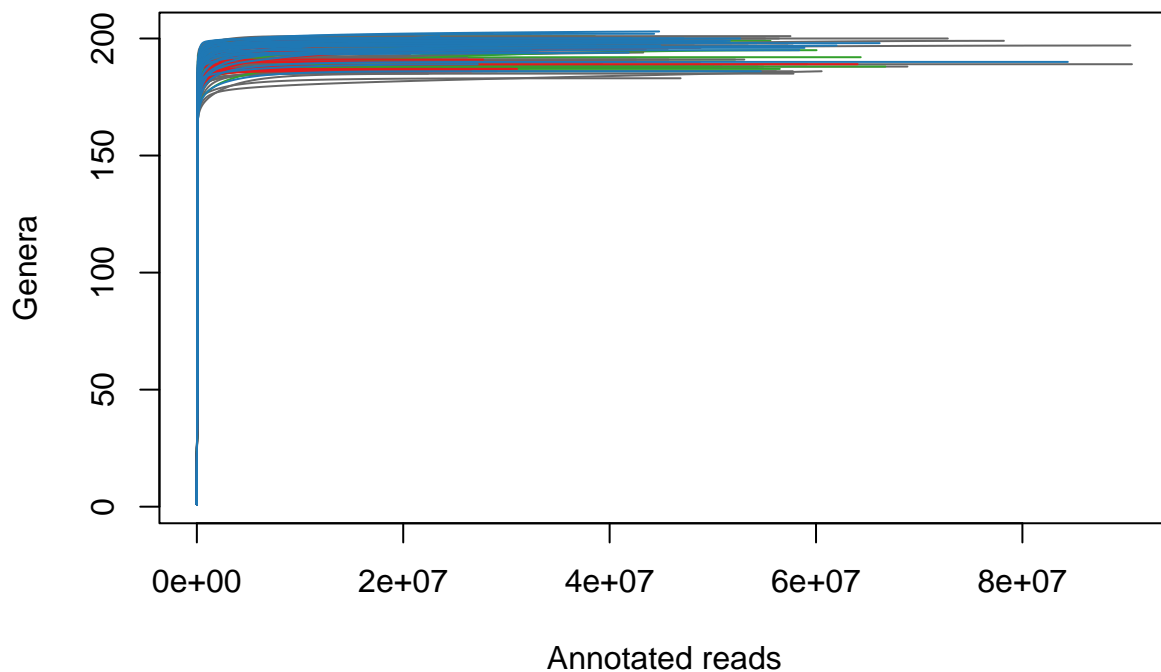

```

pdf(paste("MicroLADA_Rarecurve_MetRem_Func.pdf", sep=""), height=6, width=8)
rarecurve(t(Taxonomy2), step=100000, xlab="Annotated reads", ylab="Genera",
          col=rare$colors,
          lty=rare$line, label=FALSE)
dev.off()

```

```

## pdf
## 2

```

```

##Rank abundance curves
#Total sum scaling (Use relative abundances)
Taxonomy2<-sweep(Taxonomy2, 2, colSums(Taxonomy2), FUN="/")

##RAC all and diagnostic groupings
pdf(paste("MicroLADA_RAC_MetRem_Func", ".pdf", sep=""), width=12, height=6)

```

```

par(mfrow=c(1,5))
Subset <- c("All", "Control", "T1D", "LADA", "T2D")

for (i in Subset) {
  #Subsetting Metadata according to
  if (i=="All") {
    Metadata3 <- Metadata2
  } else if (i=="Control") {
    Metadata3<-filter(Metadata2, Diagnosis == "Control")
  } else if (i=="T1D") {
    Metadata3<-filter(Metadata2, Diagnosis == "T1D")
  } else if (i=="LADA") {
    Metadata3<-filter(Metadata2, Diagnosis == "LADA")
  } else if (i=="T2D") {
    Metadata3<-filter(Metadata2, Diagnosis == "T2D")
  } else {
    print("Subset defined not valid")
  }

  #Applying subsetting to OTU tables, have already TSS
  Taxonomy3<-dplyr::select(Taxonomy2, one_of(as.character(Metadata3$MicrobiomeID)))
  #Setting up ranks
  RankAbun.1 <- rankabundance(t(Taxonomy3))
  #Create RACplot
  rankabunplot(RankAbun.1, scale='proportion', addit=FALSE, specnames=c(1,2,3,4,5),
               xlim=c(0,60), main=i)
}
dev.off()

```

```

## pdf
## 2

```

```

#Include in pdf
Subset <- c("All", "Control", "T1D", "LADA", "T2D")
for (i in Subset) {
  #Subsetting Metadata according to
  if (i=="All") {
    Metadata3 <- Metadata2
  } else if (i=="Control") {
    Metadata3<-filter(Metadata2, Diagnosis == "Control")
  } else if (i=="T1D") {
    Metadata3<-filter(Metadata2, Diagnosis == "T1D")
  } else if (i=="LADA") {
    Metadata3<-filter(Metadata2, Diagnosis == "LADA")
  } else if (i=="T2D") {
    Metadata3<-filter(Metadata2, Diagnosis == "T2D")
  } else {
    print("Subset defined not valid")
  }

  #Applying subsetting to OTU tables, have already TSS
  Taxonomy3<-dplyr::select(Taxonomy2, one_of(as.character(Metadata3$MicrobiomeID)))
  #Setting up ranks

```

```
RankAbun.1 <- rankabundance(t(Taxonomy3))
#Create RACplot
rankabunplot(RankAbun.1, scale='proportion', addit=FALSE, specnames=c(1,2,3,4,5),
             xlim=c(0,60), main=i)
}
```

## All

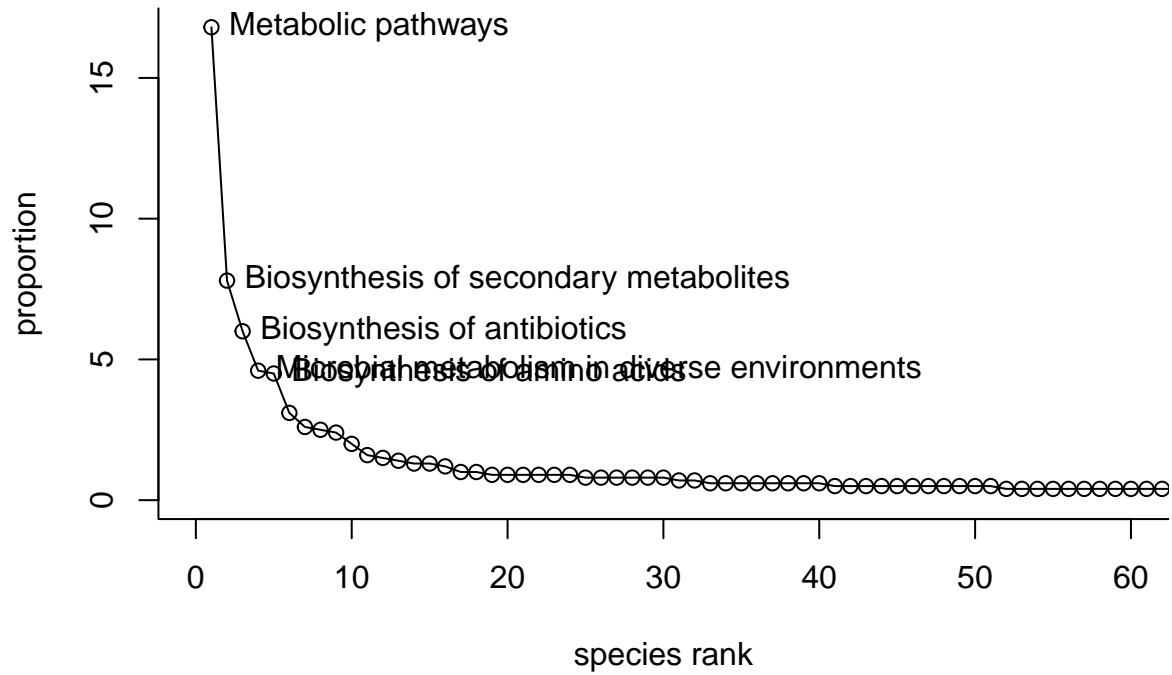

### Control

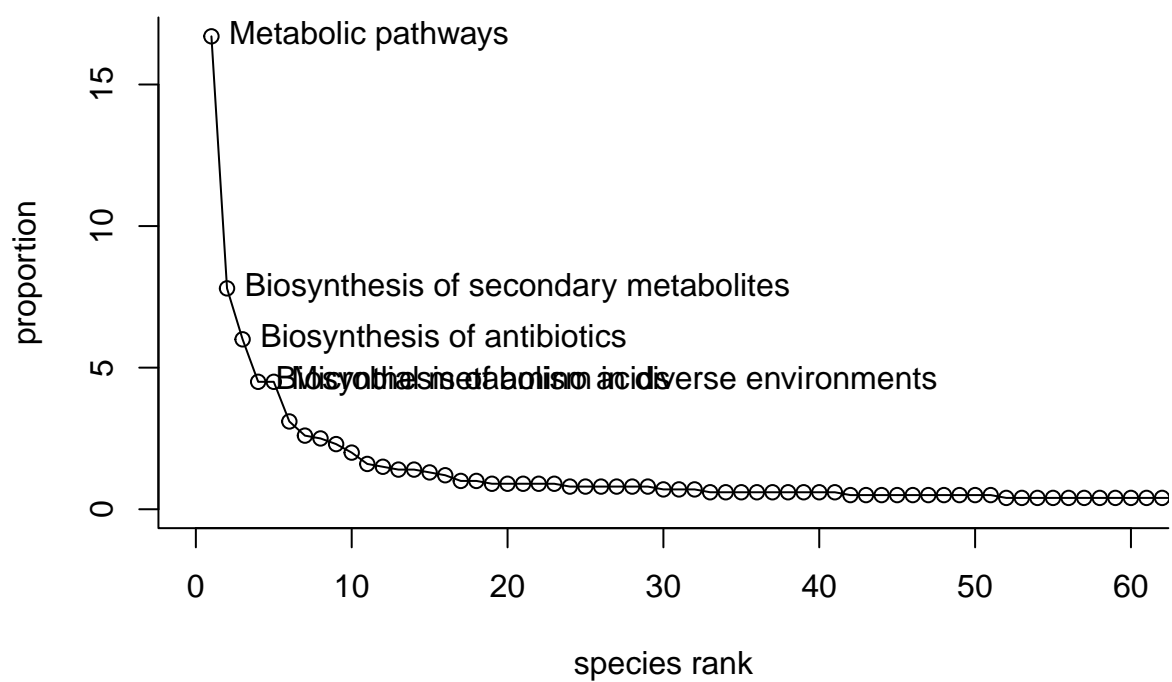

# T1D

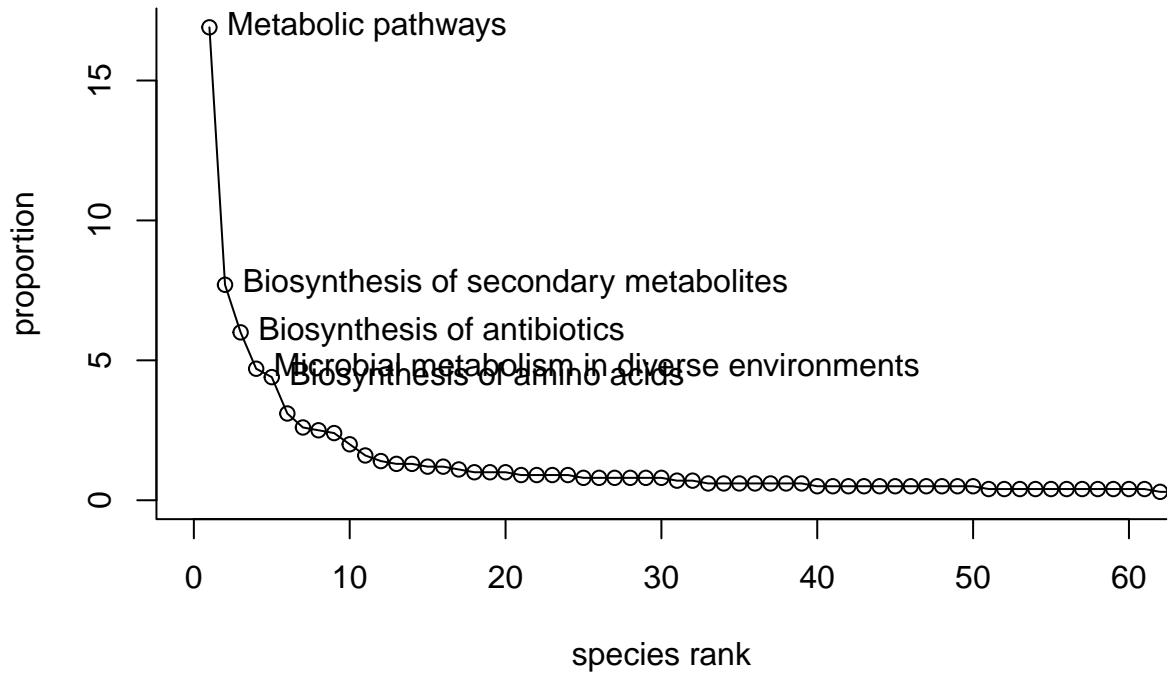

# LADA

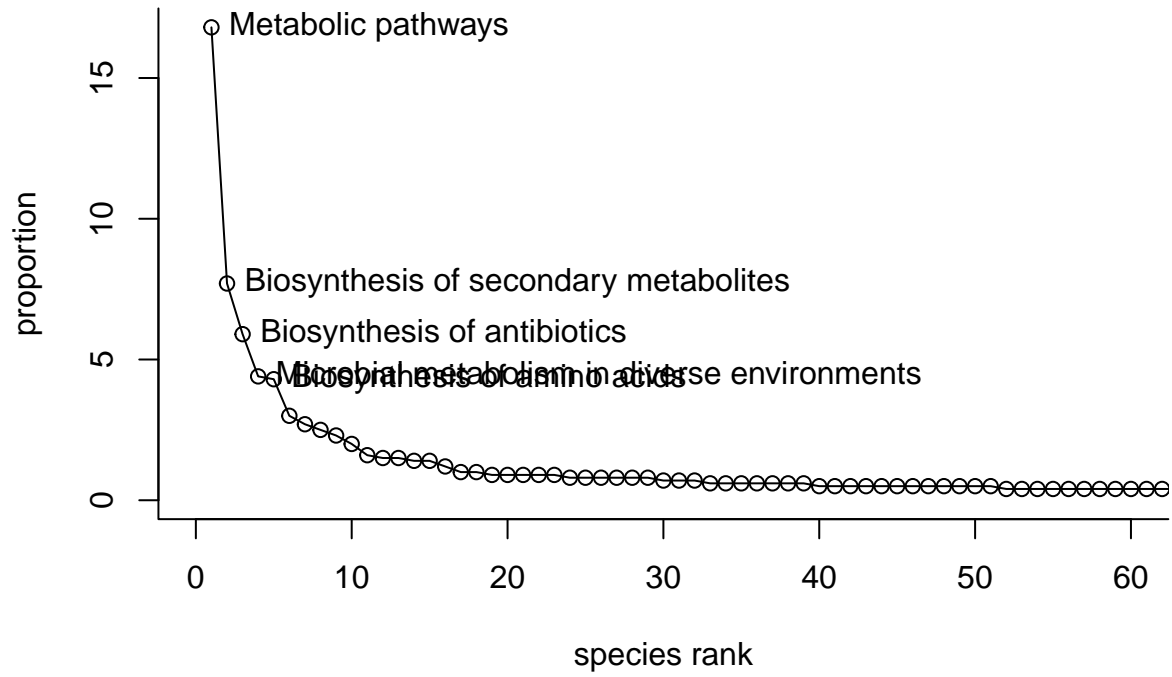

## T2D

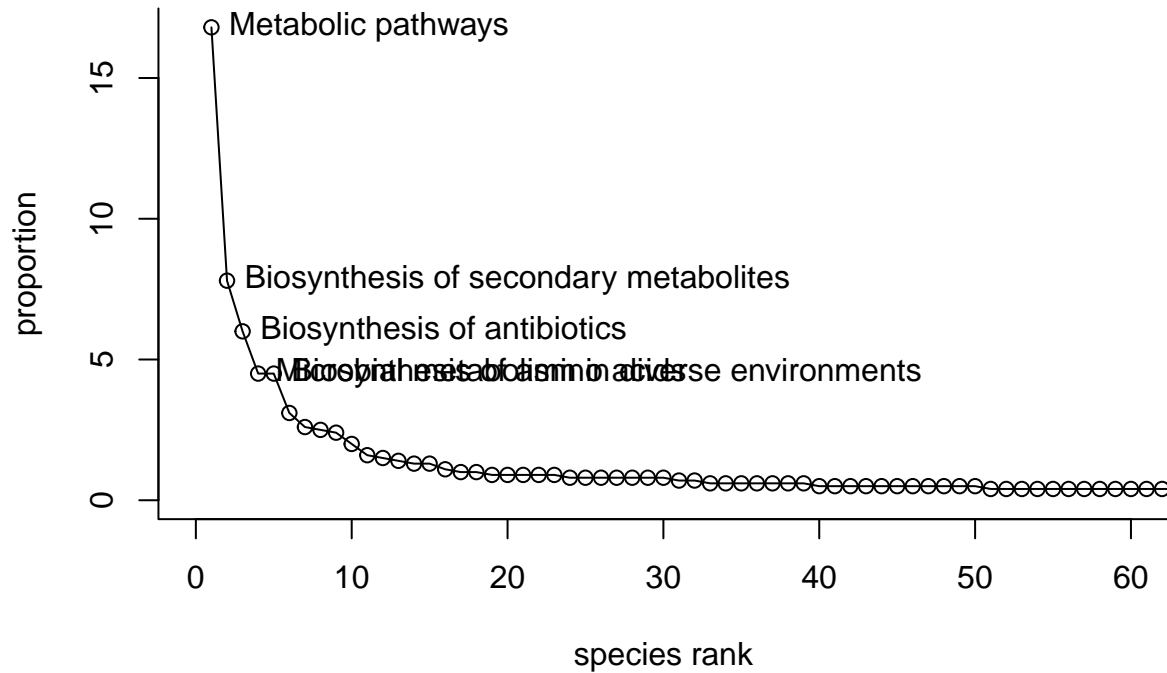

### *#Additional metadata*

```
MetadataEkstra <- read.csv(file="P:/CBMR/LADA/Text/Analysis/LADA_microbiome_extra_metadata.txt",
                           check.names=FALSE,
                           stringsAsFactors = FALSE,
                           strip.white=TRUE,
                           dec=".")
```

```
MetadataEkstra$MicrobiomeID <- paste("L", MetadataEkstra$MicrobiomeID,
                                     sep="")
```

### *#Remove metformin*

```
MetadataEkstra$Metformin <- ifelse(is.na(MetadataEkstra$Metformin), "Unknown", MetadataEkstra$Metformin)
```

```
MetadataEkstra <- filter(MetadataEkstra, !Metformin == 1)
```

### *#Merge with previous metadata*

```
covariates <- merge(covariates, MetadataEkstra[,c(1,12:length(MetadataEkstra))])
```

### *#Aggregate diagnosis mean and sd*

```
aggregate(covariates[, c(2:3, 12:length(covariates))], list(covariates$Diagnosis), mean,
          na.rm=TRUE)
```

```
##   Group.1   age    BMI    BMIq  CellNorm seq_depth   waist   hip
## 1 Control 61.44243 26.67011 2.042857 20384275367 40742480 92.89714 101.4143
## 2   T1D 51.73196 26.66011 2.066667 18731782275 42304822 98.30000 106.1833
## 3   LADA 66.61670 28.20713 2.416667 15590817082 37128727 97.41667 105.7500
## 4   T2D 63.68304 31.49826 3.130435 16982538343 39826225 109.14286 109.8571
```



```
##      whr      sbp      dbp hba1c_pct hba1c_mmol_mol      glu      chol
## 1 0.9160348 135.7643 81.03571 5.674286      38.47143 5.765714 5.444286
## 2 0.9241084 137.3500 75.98333 8.853333      73.26073 9.740000 4.860000
## 3 0.9171111 135.3056 75.30556 8.646477      71.00000 10.050000 4.258333
## 4 0.9917660 137.9318 80.43182 6.882609      51.72268 7.795652 5.113043
##      hdl      ldl      trig
## 1 1.369286 3.470000 1.344857
## 2 1.406333 2.703448 1.364333
## 3 1.441667 2.358333 1.203333
## 4 1.306957 3.040909 1.770870
```

```
aggregate(covariates[, c(2:3, 12:length(covariates))], list(covariates$Diagnosis), sd,
          na.rm=TRUE)
```

```
##  Group.1      age      BMI      BMIq  CellNorm seq_depth      waist      hip
## 1 Control 10.189143 3.722805 0.9696214 6781846681 17614052 10.80459 7.671692
## 2   T1D 6.961407 4.555865 1.2015316 5712095609 15783770 12.71206 7.790891
## 3   LADA 12.720776 5.022780 1.2401124 4604942130 12472316 16.89787 9.196096
## 4   T2D 8.549262 5.608501 1.0137396 4888235680 14549344 15.22592 9.323549
##      whr      sbp      dbp hba1c_pct hba1c_mmol_mol      glu      chol
## 1 0.08380676 18.33301 10.241052 0.3561817      3.907338 0.4845095 1.1265744
## 2 0.08055011 21.20026 10.346150 0.8076075      8.826342 4.2322734 1.3247251
## 3 0.11090078 27.12316 7.624334 1.4023922      15.326744 3.5783440 0.8743396
## 4 0.09003109 15.77317 9.861295 1.2730251      13.912891 2.7111685 1.3548916
##      hdl      ldl      trig
## 1 0.3772260 1.0489954 0.8167996
## 2 0.4137422 0.7248068 0.9030855
## 3 0.4074942 0.8328029 0.5037375
## 4 0.3891300 1.1537348 1.0565162
```

```
#Aggregate sex mean and sd
```

```
aggregate(covariates[, c(2:3, 12:length(covariates))], list(covariates$sex), mean,
          na.rm=TRUE)
```

```
##  Group.1      age      BMI      BMIq  CellNorm seq_depth      waist      hip
## 1      1 58.85014 27.72057 2.243590 19682450132 40385659 100.02949 102.8718
## 2      2 61.87243 27.49916 2.298246 18093154746 40922539 92.91818 106.1182
##      whr      sbp      dbp hba1c_pct hba1c_mmol_mol      glu      chol
## 1 0.9703762 136.8226 81.09615 6.773460      50.53729 7.182051 5.023077
## 2 0.8725230 135.8929 76.77976 6.956629      52.46553 7.640351 5.329825
##      hdl      ldl      trig
## 1 1.260128 3.109091 1.481923
## 2 1.528246 3.162500 1.309649
```

```
aggregate(covariates[, c(2:3, 12:length(covariates))], list(covariates$sex), sd,
          na.rm=TRUE)
```

```
##  Group.1      age      BMI      BMIq  CellNorm seq_depth      waist      hip
## 1      1 10.64268 4.322535 1.118741 6322346025 15361771 12.35226 7.233327
## 2      2 10.32174 5.224095 1.133341 6104790238 17457682 14.57140 10.077002
##      whr      sbp      dbp hba1c_pct hba1c_mmol_mol      glu      chol
## 1 0.07398661 17.32918 9.446039 1.624815      17.76417 2.929995 1.109689
```

```
## 2 0.07895551 21.95524 10.706984 1.561148 17.10433 3.298477 1.385507
## hdl ldl trig
## 1 0.3359943 1.054088 0.8860859
## 2 0.4024883 1.064905 0.8395066
```

```
#Test differences
df<-data.frame()
for (i in c(2:3, 12:length(covariates))) {
  design<-paste(colnames(covariates[i]), "~ Diagnosis")
  #Run kruskal-wallis test
  kwoject<-kruskal.test(formula(design), data=covariates)
  #print(kwoject)
  #Run follow up mann-whitney
  mwobject<-pairwise.wilcox.test(covariates[,i], covariates[,8],
                                p.adjust.method="bonferroni")
  #print(mwobject)
  #Bind all test
  df<-rbind(df, data.frame(kwoject$data.name, kwoject$statistic, kwoject$p.value,
                          mwobject$p.value[1,1], mwobject$p.value[2,1], mwobject$p.value[3,1],
                          mwobject$p.value[2,2], mwobject$p.value[3,2], mwobject$p.value[3,3]))
}

colnames(df)<-c("Design", "chistat", "kw p-value (p)", "mw p control vs T1D",
              "mw p control vs LADA", "mw p control vs T2D", "mw p T1D vs LADA",
              "mw p-value T1D vs T2D", "mw p-value LADA vs T2D")
kable(df[, 1:5], row.names=FALSE)
```

| Design                      | chistat    | kw p-value (p) | mw p control vs T1D | mw p control vs LADA |
|-----------------------------|------------|----------------|---------------------|----------------------|
| age by Diagnosis            | 30.8807870 | 0.0000009      | 0.0000109           | 0.7983155            |
| BMI by Diagnosis            | 16.5253521 | 0.0008847      | 1.0000000           | 1.0000000            |
| BMIq by Diagnosis           | 16.6786850 | 0.0008228      | 1.0000000           | 1.0000000            |
| CellNorm by Diagnosis       | 9.1304607  | 0.0276057      | 1.0000000           | 0.0929905            |
| seq_depth by Diagnosis      | 1.0784511  | 0.7822784      | 1.0000000           | 1.0000000            |
| waist by Diagnosis          | 17.8198774 | 0.0004791      | 0.5295941           | 1.0000000            |
| hip by Diagnosis            | 18.6119098 | 0.0003289      | 0.0206165           | 0.7844861            |
| whr by Diagnosis            | 9.3836893  | 0.0246015      | 1.0000000           | 1.0000000            |
| sbp by Diagnosis            | 0.5651568  | 0.9043605      | 1.0000000           | 1.0000000            |
| dbp by Diagnosis            | 7.4063630  | 0.0600138      | 0.1759817           | 0.2760244            |
| hba1c_pct by Diagnosis      | 98.4356210 | 0.0000000      | 0.0000000           | 0.0000002            |
| hba1c_mmol_mol by Diagnosis | 98.3646295 | 0.0000000      | 0.0000000           | 0.0000002            |
| glu by Diagnosis            | 52.7694420 | 0.0000000      | 0.0000018           | 0.0000338            |
| chol by Diagnosis           | 17.6586322 | 0.0005172      | 0.0137855           | 0.0012148            |
| hdl by Diagnosis            | 1.5100365  | 0.6799559      | 1.0000000           | 1.0000000            |
| ldl by Diagnosis            | 18.9521978 | 0.0002797      | 0.0011958           | 0.0060282            |
| trig by Diagnosis           | 5.8578350  | 0.1187355      | 1.0000000           | 1.0000000            |

```
kable(df[, c(1, 6:9)], row.names=FALSE)
```

| Design                      | mw p control vs T2D | mw p T1D vs LADA | mw p-value T1D vs T2D | mw p-value LADA vs T2D |
|-----------------------------|---------------------|------------------|-----------------------|------------------------|
| age by Diagnosis            | 1.0000000           | 0.0005720        | 0.0000078             | 1.0000000              |
| BMI by Diagnosis            | 0.0005874           | 1.0000000        | 0.0050354             | 0.6886029              |
| BMIq by Diagnosis           | 0.0003140           | 1.0000000        | 0.0121791             | 0.5623014              |
| CellNorm by Diagnosis       | 0.1808303           | 0.6998477        | 1.0000000             | 1.0000000              |
| seq_depth by Diagnosis      | 1.0000000           | 1.0000000        | 1.0000000             | 1.0000000              |
| waist by Diagnosis          | 0.0001944           | 1.0000000        | 0.1050003             | 0.7471481              |
| hip by Diagnosis            | 0.0011702           | 1.0000000        | 1.0000000             | 1.0000000              |
| whr by Diagnosis            | 0.0164348           | 1.0000000        | 0.0927908             | 0.5107970              |
| sbp by Diagnosis            | 1.0000000           | 1.0000000        | 1.0000000             | 1.0000000              |
| dbp by Diagnosis            | 1.0000000           | 1.0000000        | 0.7308104             | 1.0000000              |
| hba1c_pct by Diagnosis      | 0.0000000           | 1.0000000        | 0.0000376             | 0.0046811              |
| hba1c_mmol_mol by Diagnosis | 0.0000000           | 1.0000000        | 0.0000376             | 0.0046811              |
| glu by Diagnosis            | 0.0000006           | 1.0000000        | 0.1712058             | 0.3220620              |
| chol by Diagnosis           | 1.0000000           | 0.2505788        | 1.0000000             | 0.8339288              |
| hdl by Diagnosis            | 1.0000000           | 1.0000000        | 1.0000000             | 1.0000000              |
| ldl by Diagnosis            | 1.0000000           | 1.0000000        | 1.0000000             | 0.6979424              |
| trig by Diagnosis           | 0.1357372           | 1.0000000        | 0.3643004             | 0.4408450              |

```
#Diagnostic criteria
```

```
T1D<-filter(covariates, Diagnosis=="T1D")
range(T1D$hba1c_pct)
```

```
## [1] 7.6 11.0
```

```
Controls<-filter(covariates, Diagnosis=="Control")
range(Controls$glu)
```

```
## [1] 4.2 6.8
```

```
range(Controls$hba1c_pct)
```

```
## [1] 4.8 6.2
```

## Alpha diversity

Part of figure 1

```
rm(list=setdiff(ls(), c("Metadata", "MetadataMed", "Feature", "TaxonomyDA", "Taxonomy")))
```

```
#Calculate alpha diversity stats
```

```
#Use vegan to calculate various diversity and richness indices for each sample
```

```
set.seed(1)
```

```
diversityCalc <- data.frame(Shannon=diversity(t(Taxonomy), index="shannon"),
                           Simpson=diversity(t(Taxonomy), index="simpson"),
                           invSimpson=diversity(t(Taxonomy), index="invsimpson"),
                           fisher=fisher.alpha(t(Taxonomy)),
                           richness=specnumber(t(Taxonomy)),
```

```

rarefy_min_count=rarefy(t(Taxonomy),
                        sample=min(rowSums(t(Taxonomy)))),
chao1=estimateR(t(Taxonomy))["S.chao1",],
chao1SE=estimateR(t(Taxonomy))["se.chao1",],
#ShannonRar=diversity(rrarefy(data.frame(t(Taxonomy)),
#                          min(rowSums(t(Taxonomy)))),
#                      index="shannon"),
#SimpsonRar=diversity(rrarefy(data.frame(t(Taxonomy)),
#                                    min(rowSums(t(Taxonomy)))),
#                     index="simpson"),
#invSimpsonRar=diversity(rrarefy(data.frame(t(Taxonomy)),
#                                       min(rowSums(t(Taxonomy)))),
#                         index="invsimpson"),
Pielou=diversity(t(Taxonomy))/log(specnumber(t(Taxonomy)))

#Merge with metadata.
diversityCalc<-add_rownames(diversityCalc, "MicrobiomeID")
Metadata2 <- merge(Metadata, diversityCalc, by="MicrobiomeID")

#Create a list to hold the plot objects.
Fig1List <- list()
#Create vector to loop
#AlphaDiv<-c("fisher", "Shannon", "Simpson", "invSimpson", "richness", "chao1",
#            "ShannonRar", "SimpsonRar", "invSimpsonRar", "Pielou")
AlphaDiv<-c("fisher", "Shannon", "Simpson", "invSimpson", "richness", "chao1", "Pielou")
#Plot
for (i in AlphaDiv) {
  #Create plot name
  pltName <- paste('Alpha', i, sep = '')
  #create boxplots
  Fig1List[[ pltName ]]<-
  ggplot(Metadata2, aes_string(x="Diagnosis", y=i, group="Diagnosis")) +
    geom_violin(aes(fill=Diagnosis, trim=FALSE)) +
    stat_summary(fun.data="mean_sdl",
                mult=1, #mean plus minus a constant (mult=1) times the st.dev
                geom="pointrange",
                width=0.2 ) +
    #stat_summary(fun.y = mean, geom = "point") +
    #facet_grid(. ~ Metformin, scales="fixed") + #Scales can also be "free"
    #ggtitle(paste("Genus", i, sep=" ")) +
    #xlab("Diagnosis") +
    ylab(paste(i)) +
    scale_fill_manual(values=c(Control = "#666666", T1D = "#1F78B4",
                              T2D = "#33A02C", LADA = "#E31A1C")) +
    theme_bw() +
    theme(legend.position="none", panel.grid.major = element_blank(),
          panel.grid.minor = element_blank(), axis.title=element_text(size=20),
          axis.title.x = element_blank(),
          axis.text.x = element_text(angle = 45, hjust = 1, size=16),
          axis.text.y = element_text(angle = 45, hjust = 1, size=12))
}

#Have the plots stored in lists

```

```
lay <- rbind(c(1,2,3))
pdf(paste("MicroLADA_Alpha_Func", ".pdf", sep=""), width=12, height=6)
grid.arrange(Fig1List$Alpharichness,
             Fig1List$AlphaPielou, Fig1List$AlphaShannon, layout_matrix = lay)
dev.off()
```

```
## pdf
## 2
```

```
grid.arrange(Fig1List$Alpharichness,
             Fig1List$AlphaPielou, Fig1List$AlphaShannon, layout_matrix = lay)
```

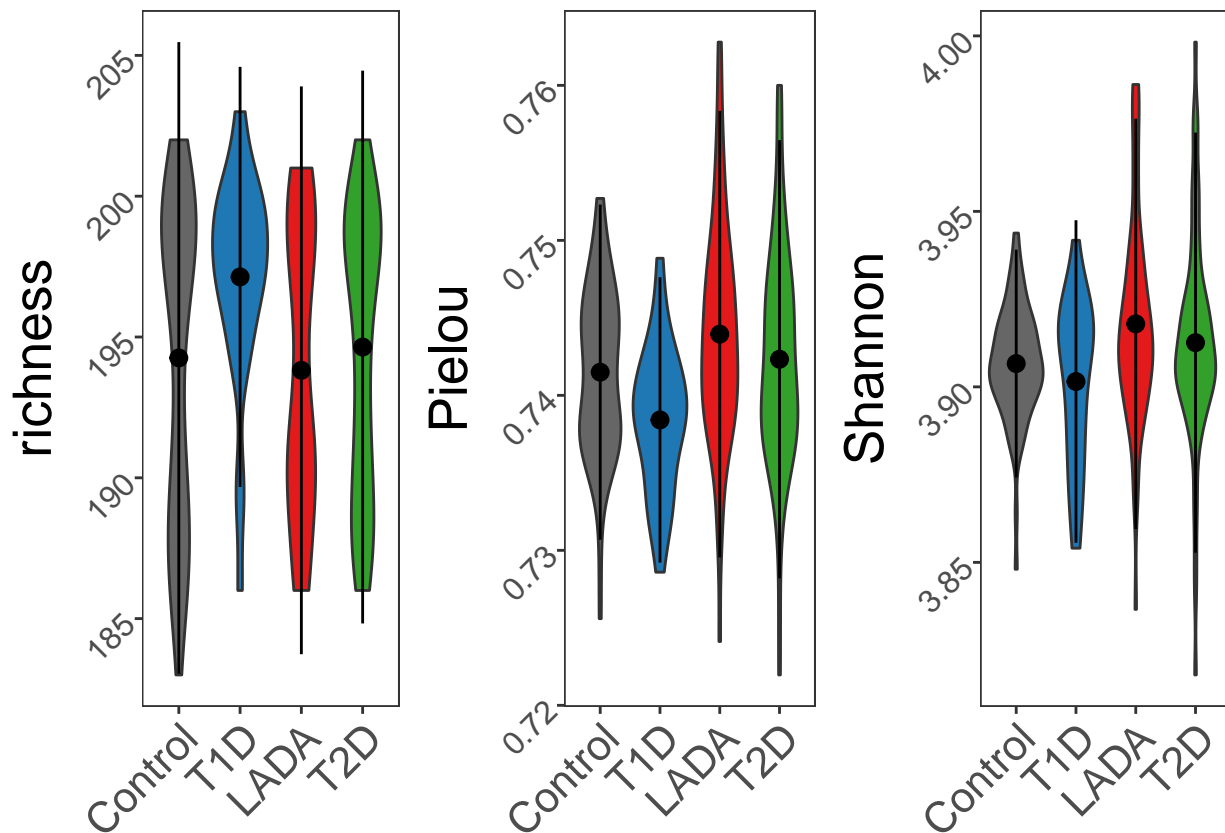

```
#Kruskal test
kruskal.test(richness ~ Diagnosis, data=Metadata2)
```

```
##
## Kruskal-Wallis rank sum test
##
## data: richness by Diagnosis
## Kruskal-Wallis chi-squared = 6.3418, df = 3, p-value = 0.09611
```

```
kruskal.test(Pielou ~ Diagnosis, data=Metadata2)
```

```
##
## Kruskal-Wallis rank sum test
##
## data: Pielou by Diagnosis
## Kruskal-Wallis chi-squared = 15.267, df = 3, p-value = 0.001602
```

```
kruskal.test(Shannon ~ Diagnosis, data=Metadata2)
```

```
##
## Kruskal-Wallis rank sum test
##
## data: Shannon by Diagnosis
## Kruskal-Wallis chi-squared = 7.7326, df = 3, p-value = 0.05187
```

```
#If significant Mann-Whitney pairwise post-test
pairwise.wilcox.test(Metadata2$richness, Metadata2$Diagnosis,
                     p.adjust.method="bonferroni")
```

```
##
## Pairwise comparisons using Wilcoxon rank sum test with continuity correction
##
## data: Metadata2$richness and Metadata2$Diagnosis
##
##      Control T1D  LADA
## T1D  0.366    -    -
## LADA 1.000    0.058 -
## T2D  1.000    0.250 1.000
##
## P value adjustment method: bonferroni
```

```
pairwise.wilcox.test(Metadata2$Pielou, Metadata2$Diagnosis,
                     p.adjust.method="bonferroni")
```

```
##
## Pairwise comparisons using Wilcoxon rank sum test with continuity correction
##
## data: Metadata2$Pielou and Metadata2$Diagnosis
##
##      Control T1D  LADA
## T1D  0.06823 -    -
## LADA 0.24899 0.00085 -
## T2D  1.00000 0.04497 1.00000
##
## P value adjustment method: bonferroni
```

```
pairwise.wilcox.test(Metadata2$Shannon, Metadata2$Diagnosis,
                     p.adjust.method="bonferroni")
```

```
##
## Pairwise comparisons using Wilcoxon rank sum test with continuity correction
##
```

```
## data: Metadata2$Shannon and Metadata2$Diagnosis
##
##      Control T1D   LADA
## T1D  1.000   -     -
## LADA 0.096   0.205 -
## T2D  1.000   0.964 1.000
##
## P value adjustment method: bonferroni
```

## Alpha diversity remove metformin

```
rm(list=setdiff(ls(), c("Metadata", "MetadataMed", "Feature", "TaxonomyDA", "Taxonomy"
, "Fig1List")))
##Removing treated with metformin
#Metadata$Metformin <- ifelse(is.na(Metadata$Metformin), "Unknown", Metadata$Metformin)
Metadata2<-filter(Metadata, !Metformin == 1)
##Applying subsetting to OTU tables
Taxonomy2<-dplyr::select(Taxonomy, one_of(as.character(Metadata2$MicrobiomeID)))
##Remove orgs that are not present after subsetting.
Taxonomy2 <- Taxonomy2[rowSums(Taxonomy2)>0,]

#Calculate alpha diversity stats
#Use vegan to calculate various diversity and richness indices for each sample
set.seed(1)
diversityCalc <- data.frame(Shannon=diversity(t(Taxonomy2), index="shannon"),
Simpson=diversity(t(Taxonomy2), index="simpson"),
invSimpson=diversity(t(Taxonomy2), index="invsimpson"),
fisher=fisher.alpha(t(Taxonomy2)),
richness=specnumber(t(Taxonomy2)),
rarefy_min_count=rarefy(t(Taxonomy2),
sample=min(rowSums(t(Taxonomy2))))),
chao1=estimateR(t(Taxonomy2))["S.chao1",],
chao1SE=estimateR(t(Taxonomy2))["se.chao1",],
#ShannonRar=diversity(rrarefy(data.frame(t(Taxonomy2)),
# min(rowSums(t(Taxonomy2))))),
# index="shannon"),
#SimpsonRar=diversity(rrarefy(data.frame(t(Taxonomy2)),
# min(rowSums(t(Taxonomy2))))),
# index="simpson"),
#invSimpsonRar=diversity(rrarefy(data.frame(t(Taxonomy2)),
# min(rowSums(t(Taxonomy2))))),
# index="invsimpson"),
Pielou=diversity(t(Taxonomy2))/log(specnumber(t(Taxonomy2))))

#Merge with metadata.
diversityCalc<-add_rownames(diversityCalc, "MicrobiomeID")
Metadata2 <- merge(Metadata2, diversityCalc, by="MicrobiomeID")

#Create a list to hold the plot objects.
Fig1ListRemMet <- list()
#Create vector to loop
#AlphaDiv<-c("fisher", "Shannon", "Simpson", "invSimpson", "richness", "chao1",
```

```

#           "ShannonRar", "SimpsonRar", "invSimpsonRar", "Pielou")
AlphaDiv<-c("fisher", "Shannon", "Simpson", "invSimpson", "richness", "chao1", "Pielou")
#Plot
for (i in AlphaDiv) {
  #Create plot name
  pltName <- paste('Alpha', i, sep = '')
  #create boxplots
  Fig1ListRemMet[[ pltName ]]<-
  ggplot(Metadatas2, aes_string(x="Diagnosis", y=i, group="Diagnosis")) +
    geom_violin(aes(fill=Diagnosis, trim=FALSE)) +
    stat_summary(fun.data="mean_sdl",
                 mult=1, #mean plus minus a constant (mult=1) times the st.dev
                 geom="pointrange",
                 width=0.2 ) +
    #stat_summary(fun.y = mean, geom = "point") +
    #facet_grid(. ~ Metformin, scales="fixed") + #Scales can also be "free"
    #ggtitle(paste("Genus", i, sep=" ")) +
    #xlab("Diagnosis") +
    ylab(paste(i)) +
    scale_fill_manual(values=c(Control = "#666666", T1D = "#1F78B4",
                                T2D = "#33A02C", LADA = "#E31A1C")) +
    theme_bw() +
    theme(legend.position="none", panel.grid.major = element_blank(),
          panel.grid.minor = element_blank(), axis.title=element_text(size=20),
          axis.title.x = element_blank(),
          axis.text.x = element_text(angle = 45, hjust = 1, size=16),
          axis.text.y = element_text(angle = 45, hjust = 1, size=12))
}

#Have the plots stored in lists
lay <- rbind(c(1,2,3))
pdf(paste("MicroLADA_Alpha_RemMet_Func", ".pdf", sep=""), width=12, height=6)
grid.arrange(Fig1ListRemMet$Alpharichness,
              Fig1ListRemMet$AlphaPielou,
              Fig1ListRemMet$AlphaShannon, layout_matrix = lay)
dev.off()

```

```

## pdf
## 2

```

```

grid.arrange(Fig1ListRemMet$Alpharichness,
              Fig1ListRemMet$AlphaPielou,
              Fig1ListRemMet$AlphaShannon, layout_matrix = lay)

```



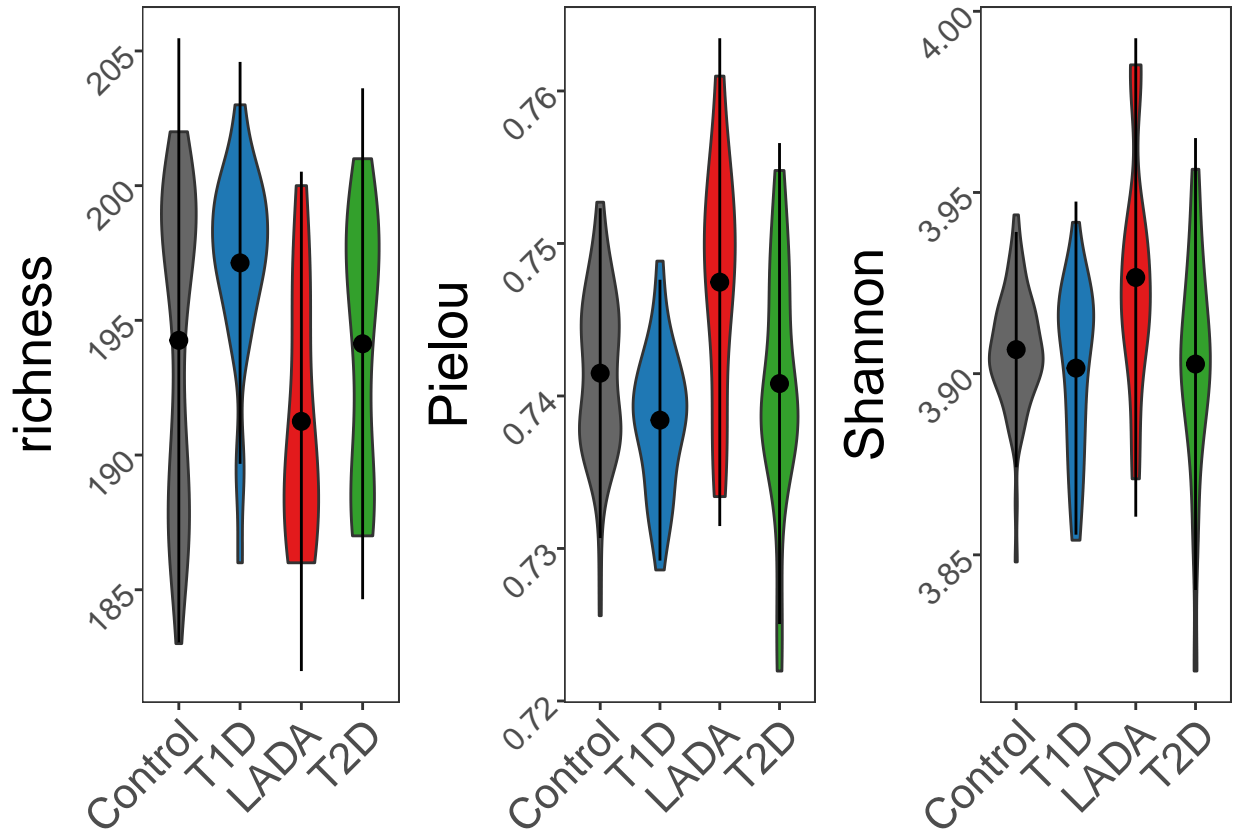

```
#Kruskal test
kruskal.test(richness ~ Diagnosis, data=Metadata2)
```

```
##
## Kruskal-Wallis rank sum test
##
## data: richness by Diagnosis
## Kruskal-Wallis chi-squared = 10.802, df = 3, p-value = 0.01285
```

```
kruskal.test(Pielou ~ Diagnosis, data=Metadata2)
```

```
##
## Kruskal-Wallis rank sum test
##
## data: Pielou by Diagnosis
## Kruskal-Wallis chi-squared = 13.649, df = 3, p-value = 0.003424
```

```
kruskal.test(Shannon ~ Diagnosis, data=Metadata2)
```

```
##
## Kruskal-Wallis rank sum test
##
## data: Shannon by Diagnosis
## Kruskal-Wallis chi-squared = 6.3561, df = 3, p-value = 0.09551
```

```
#If significant Mann-Whitney pairwise post-test
pairwise.wilcox.test(Metadata2$richness, Metadata2$Diagnosis,
                     p.adjust.method="bonferroni")
```

```
##
## Pairwise comparisons using Wilcoxon rank sum test with continuity correction
##
## data: Metadata2$richness and Metadata2$Diagnosis
##
##      Control T1D   LADA
## T1D  0.3663  -     -
## LADA 0.4764  0.0067 -
## T2D  1.0000  0.1381 0.5423
##
## P value adjustment method: bonferroni
```

```
pairwise.wilcox.test(Metadata2$Pielou, Metadata2$Diagnosis,
                     p.adjust.method="bonferroni")
```

```
##
## Pairwise comparisons using Wilcoxon rank sum test with continuity correction
##
## data: Metadata2$Pielou and Metadata2$Diagnosis
##
##      Control T1D   LADA
## T1D  0.0682  -     -
## LADA 0.0512  0.0061 -
## T2D  1.0000  1.0000 0.3171
##
## P value adjustment method: bonferroni
```

```
pairwise.wilcox.test(Metadata2$Shannon, Metadata2$Diagnosis,
                     p.adjust.method="bonferroni")
```

```
##
## Pairwise comparisons using Wilcoxon rank sum test with continuity correction
##
## data: Metadata2$Shannon and Metadata2$Diagnosis
##
##      Control T1D   LADA
## T1D  1.000  -     -
## LADA 0.096  0.177 -
## T2D  1.000  1.000 0.291
##
## P value adjustment method: bonferroni
```

## Violin plots Dissimilarities

Part of figure 1

```

rm(list=setdiff(ls(), c("Metadata", "MetadataMed", "Feature", "TaxonomyDA", "Taxonomy",
                        "Fig1List", "Fig1ListRemMet")))

##Create long format of dissimilarities
##Multi dimensional scaling
dismatrix <- vegdist(decostand(t(Taxonomy), method="hellinger"), method="bray")

#Contains all values except the ones equal to 0
meltPwBC<-subset(melt(as.matrix(dismatrix)))
rm(dismatrix) #Have comparisons of both 1vs2 and 2vs1 ..., but are removed during the
              #following filtration.
              #The same applies to comparisons of the same sample with itself

LADA_V <- subset(Metadata, Diagnosis=="LADA") %>% dplyr::select(one_of("MicrobiomeID")) %>%
  pull(MicrobiomeID) #>% droplevels()
T1D_V <- subset(Metadata, Diagnosis=="T1D") %>% dplyr::select(one_of("MicrobiomeID")) %>%
  pull(MicrobiomeID) #>% droplevels()
T2D_V <- subset(Metadata, Diagnosis=="T2D") %>% dplyr::select(one_of("MicrobiomeID")) %>%
  pull(MicrobiomeID) #>% droplevels()
Control_V <- subset(Metadata, Diagnosis=="Control") %>% dplyr::select(one_of("MicrobiomeID")) %>%
  pull(MicrobiomeID) #>% droplevels()

meltPwBC$Compare <- ifelse (meltPwBC$Var1 %in% LADA_V & meltPwBC$Var2 %in% T1D_V,
                          "LADA vs T1D",
                          ifelse (meltPwBC$Var1 %in% LADA_V & meltPwBC$Var2 %in% T2D_V,
                                  "LADA vs T2D",
                                  ifelse (meltPwBC$Var1 %in% LADA_V & meltPwBC$Var2 %in% Control_V,
                                          "LADA vs Control",
                                          ifelse (meltPwBC$Var1 %in% T1D_V & meltPwBC$Var2 %in% T2D_V,
                                                  "T1D vs T2D",
                                                  ifelse (meltPwBC$Var1 %in% T1D_V & meltPwBC$Var2 %in% Control_V,
                                                          "T1D vs Control",
                                                          ifelse (meltPwBC$Var1 %in% T2D_V & meltPwBC$Var2 %in% Control_V,
                                                                  "T2D vs Control", "hmmmmmm"))))))))

##Control validation
#table((meltPwBC$Var1 %in% LADA_V) & (meltPwBC$Var2 %in% T1D_V))
#table(meltPwBC$Compare)

meltPwBC<-subset(meltPwBC, meltPwBC$Compare!="hmmmmmm")

#Defining the order, can change if needed
meltPwBC$Compare<-factor(meltPwBC$Compare,
                        levels= c("LADA vs T1D", "LADA vs T2D", "LADA vs Control",
                                  "T1D vs T2D", "T1D vs Control", "T2D vs Control"))

violinDissi<-ggplot(meltPwBC, aes(x=Compare, y=value)) +
  geom_violin(trim=FALSE, fill="purple", colour="purple") +
  stat_summary(fun.data="mean_sdl", mult=1, #mean ± a constant (mult=1) times the st.dev
              geom="pointrange", width=0.2 ) +
  #geom_dotplot(binaxis='y', stackdir='center', dotsize=0.01) +
  labs(x="", y="Dissimilarity") +
  theme_bw() +

```

```
theme(legend.position="none", panel.grid.major = element_blank(),
      panel.grid.minor = element_blank())
```

```
violinDissi
```

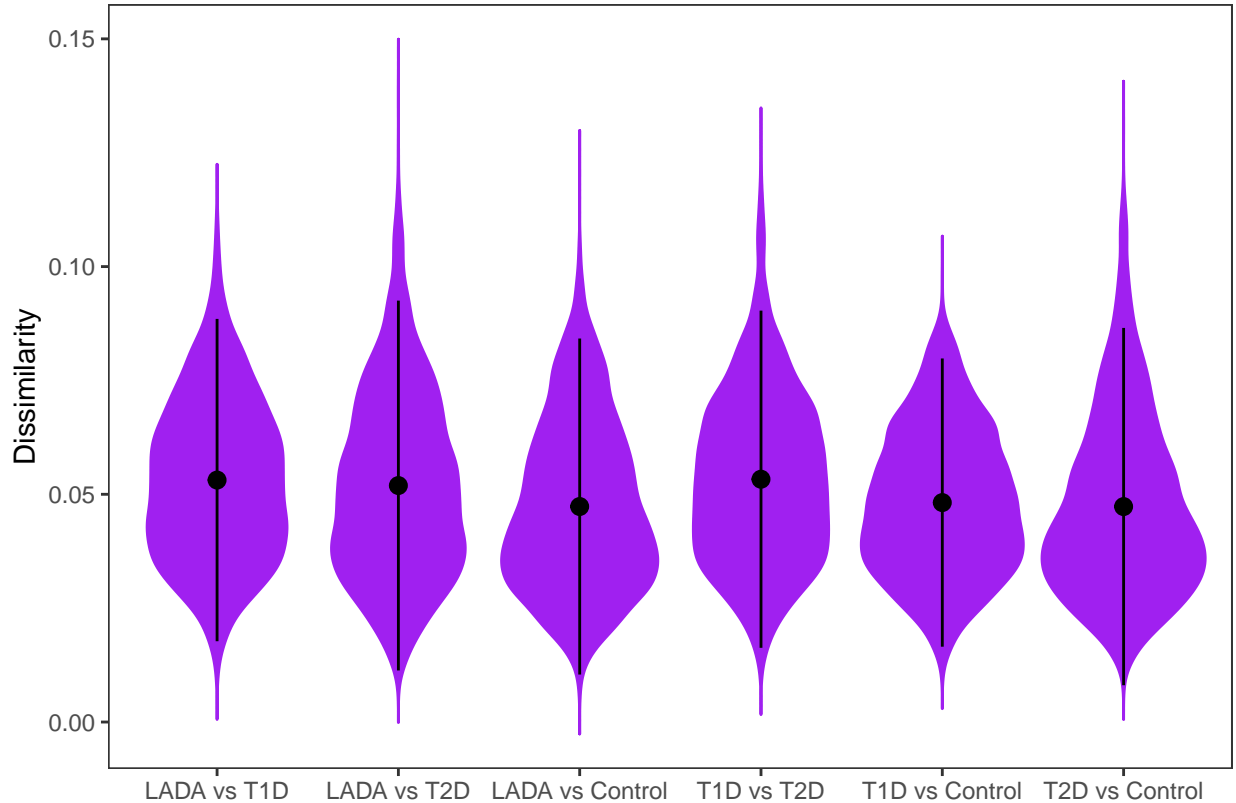

```
pdf(paste("MicroLADA_ViolinDissi_Func", ".pdf", sep=""), width=12, height=6)
violinDissi
dev.off()
```

```
## pdf
## 2
```

```
#Kruskal test
kruskal.test(value ~ Compare, data=meltPwBC)
```

```
##
## Kruskal-Wallis rank sum test
##
## data: value by Compare
## Kruskal-Wallis chi-squared = 382.99, df = 5, p-value < 2.2e-16
```

```
#If significant Mann-Whitney pairwise post-test
pairwise.wilcox.test(meltPwBC$value, meltPwBC$Compare, p.adjust.method="bonferroni")
```

```
##
## Pairwise comparisons using Wilcoxon rank sum test with continuity correction
##
## data: meltPwBC$value and meltPwBC$Compare
##
##           LADA vs T1D LADA vs T2D LADA vs Control T1D vs T2D
## LADA vs T2D      0.015      -      -      -
## LADA vs Control < 2e-16 < 2e-16      -      -
## T1D vs T2D       1.000      0.011 < 2e-16      -
## T1D vs Control  1.2e-15  1.7e-07  0.012      2.7e-16
## T2D vs Control  < 2e-16 < 2e-16  1.000      < 2e-16
##
##           T1D vs Control
## LADA vs T2D      -
## LADA vs Control  -
## T1D vs T2D       -
## T1D vs Control  -
## T2D vs Control  3.0e-05
##
## P value adjustment method: bonferroni
```

```
#####
##Create long format of dissimilarities
##Multi dimensional scaling
dismatrix <- vegdist(decostand(t(Taxonomy), method="hellinger"), method="bray")

#Contains all values except the ones equal to 0
meltPwBC<-subset(melt(as.matrix(dismatrix)), value!=0)
#meltPwBC<-subset(melt(as.matrix(dismatrix)))
rm(dismatrix) #Have comparisons of both 1vs2 and 2vs1 ..., but are removed during the
              #following filtration.
              #The same applies to comparisons of the same sample with itself

LADA_V <- subset(Metadata, Diagnosis=="LADA") %>% dplyr::select(one_of("MicrobiomeID")) %>%
  pull(MicrobiomeID) #>% droplevels()
T1D_V <- subset(Metadata, Diagnosis=="T1D") %>% dplyr::select(one_of("MicrobiomeID")) %>%
  pull(MicrobiomeID) #>% droplevels()
T2D_V <- subset(Metadata, Diagnosis=="T2D") %>% dplyr::select(one_of("MicrobiomeID")) %>%
  pull(MicrobiomeID) #>% droplevels()
Control_V <- subset(Metadata, Diagnosis=="Control") %>% dplyr::select(one_of("MicrobiomeID")) %>%
  pull(MicrobiomeID) #>% droplevels()

meltPwBC$Compare <- ifelse (meltPwBC$Var1 %in% LADA_V & meltPwBC$Var2 %in%
  LADA_V, "LADA",
  ifelse (meltPwBC$Var1 %in% T1D_V & meltPwBC$Var2 %in%
  T1D_V, "T1D",
  ifelse (meltPwBC$Var1 %in% T2D_V & meltPwBC$Var2 %in%
  T2D_V, "T2D",
  ifelse (meltPwBC$Var1 %in% Control_V & meltPwBC$Var2 %in%
  Control_V, "Control",
  ifelse (meltPwBC$Var1 %in% LADA_V & meltPwBC$Var2 %in%
  T1D_V, "LADA vs T1D",
```

```

        ifelse (meltPwBC$Var1 %in% LADA_V & meltPwBC$Var2 %in%
                T2D_V, "LADA vs T2D",
        ifelse (meltPwBC$Var1 %in% LADA_V & meltPwBC$Var2 %in%
                Control_V, "LADA vs Control",
        ifelse (meltPwBC$Var1 %in% T1D_V & meltPwBC$Var2 %in%
                T2D_V, "T1D vs T2D",
        ifelse (meltPwBC$Var1 %in% T1D_V & meltPwBC$Var2 %in%
                Control_V, "T1D vs Control",
        ifelse (meltPwBC$Var1 %in% T2D_V & meltPwBC$Var2 %in%
                Control_V, "T2D vs Control", "hmmmmmm"))))))))

##Control validation
#table((meltPwBC$Var1 %in% LADA_V) & (meltPwBC$Var2 %in% T1D_V))
#table(meltPwBC$Compare)

meltPwBC<-subset(meltPwBC, meltPwBC$Compare!="hmmmmmm")

#Defining the order, can change if needed
meltPwBC$Compare<-factor(meltPwBC$Compare, levels= c("Control", "T1D",
                                                    "T2D", "LADA",
                                                    "LADA vs T1D", "LADA vs T2D",
                                                    "LADA vs Control", "T1D vs T2D",
                                                    "T1D vs Control", "T2D vs Control"))

violinDissi<-ggplot(meltPwBC, aes(x=Compare, y=value)) +
  geom_violin(trim=FALSE, fill="purple", colour="purple") +
  stat_summary(fun.data="mean_sdl", mult=1, #mean ± a constant (mult=1) times the st.dev
              geom="pointrange", width=0.2 ) +
  #geom_dotplot(binaxis='y', stackdir='center', dotsize=0.01) +
  labs(x="", y="Dissimilarity") +
  theme_bw() +
  theme(legend.position="none", panel.grid.major = element_blank(),
        panel.grid.minor = element_blank(),
        axis.text.x = element_text(angle = 45, hjust = 1))

violinDissi

```

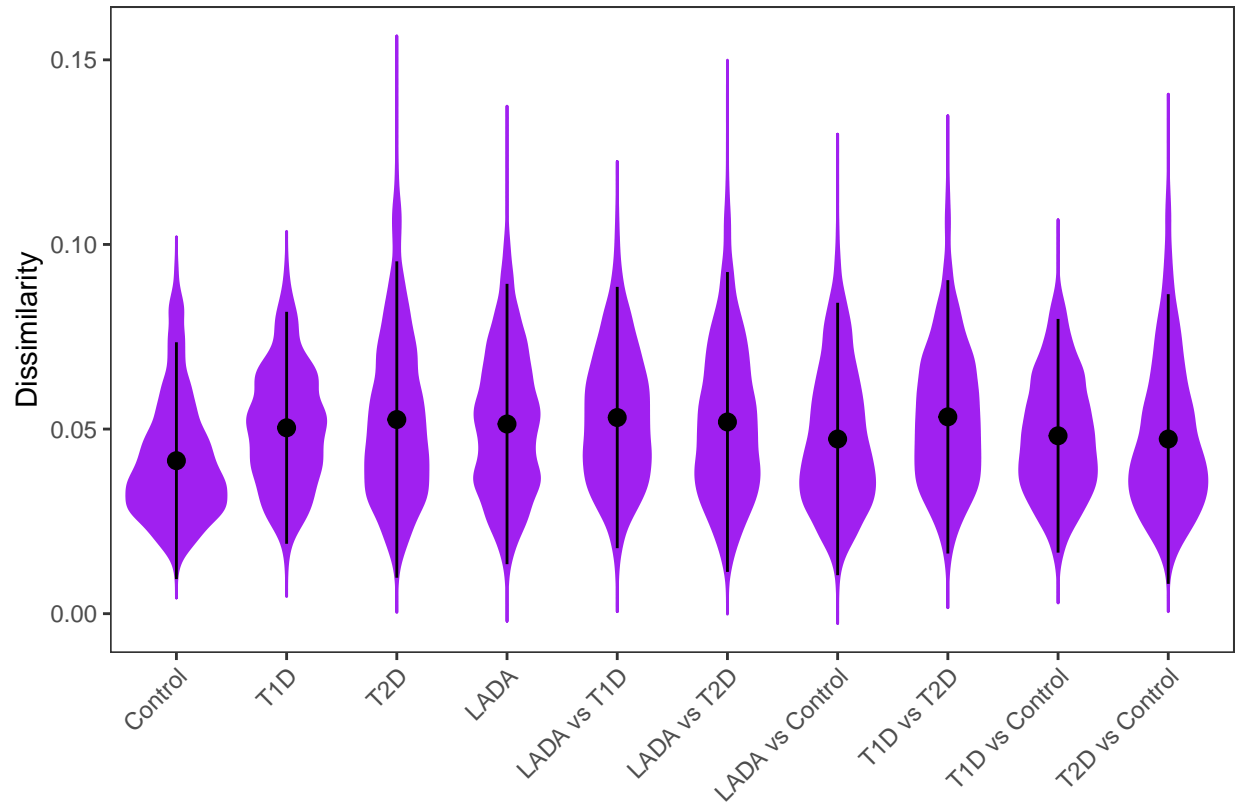

```
pdf(paste("MicroLADA_ViolinDissiAllComp_Func", ".pdf", sep=""), width=12, height=6)
violinDissi
dev.off()
```

```
## pdf
## 2
```

```
#Kruskal test
kruskal.test(value ~ Compare, data=meltPwBC)
```

```
##
## Kruskal-Wallis rank sum test
##
## data: value by Compare
## Kruskal-Wallis chi-squared = 1412.8, df = 9, p-value < 2.2e-16
```

```
#If significant Mann-Whitney pairwise post-test
pairwise.wilcox.test(meltPwBC$value, meltPwBC$Compare, p.adjust.method="bonferroni")
```

```
##
## Pairwise comparisons using Wilcoxon rank sum test with continuity correction
##
## data: meltPwBC$value and meltPwBC$Compare
##
```

```

##           Control T1D      T2D      LADA      LADA vs T1D LADA vs T2D
## T1D          < 2e-16 -          -          -          -          -
## T2D          < 2e-16 1.000    -          -          -          -
## LADA         < 2e-16 1.000    1.000    -          -          -
## LADA vs T1D  < 2e-16 0.025    0.153    0.022    -          -
## LADA vs T2D  < 2e-16 1.000    1.000    1.000    0.046    -
## LADA vs Control < 2e-16 5.8e-07 < 2e-16 < 2e-16 < 2e-16 < 2e-16
## T1D vs T2D   < 2e-16 0.024    0.122    0.016    1.000    0.033
## T1D vs Control < 2e-16 0.038    5.2e-08 1.7e-06 3.5e-15 5.1e-07
## T2D vs Control < 2e-16 9.5e-10 < 2e-16 < 2e-16 < 2e-16 < 2e-16
##           LADA vs Control T1D vs T2D T1D vs Control
## T1D          -          -          -
## T2D          -          -          -
## LADA         -          -          -
## LADA vs T1D  -          -          -
## LADA vs T2D  -          -          -
## LADA vs Control -          -          -
## T1D vs T2D   < 2e-16    -          -
## T1D vs Control 0.037          8.0e-16 -
## T2D vs Control 1.000          < 2e-16 9.1e-05
##
## P value adjustment method: bonferroni

```

```

#####
meltPwBC<-filter(meltPwBC,
  Compare == "Control" | Compare == "T1D" |
  Compare == "T2D" | Compare == "LADA")

meltPwBC$Compare<-ordered(meltPwBC$Compare,
  levels=c("Control", "T1D", "LADA", "T2D"))

violinDisi<-ggplot(meltPwBC, aes(x=Compare, y=value)) +
  geom_violin(aes(fill=Compare, trim=FALSE)) +
  stat_summary(fun.data="mean_sdl", mult=1, #mean ± a constant (mult=1) times the st.dev
    geom="pointrange", width=0.2 ) +
  labs(y="Dissimilarity") +
  scale_fill_manual(values=c(Control = "#666666", T1D = "#1F78B4",
    T2D = "#33A02C", LADA = "#E31A1C")) +
  theme_bw() +
  theme(legend.position="none", panel.grid.major = element_blank(),
    panel.grid.minor = element_blank(), axis.title=element_text(size=20),
    axis.title.x = element_blank(),
    axis.text.x = element_text(angle = 45, hjust = 1, size=16),
    axis.text.y = element_text(angle = 45, hjust = 1, size=12))

violinDisi

```



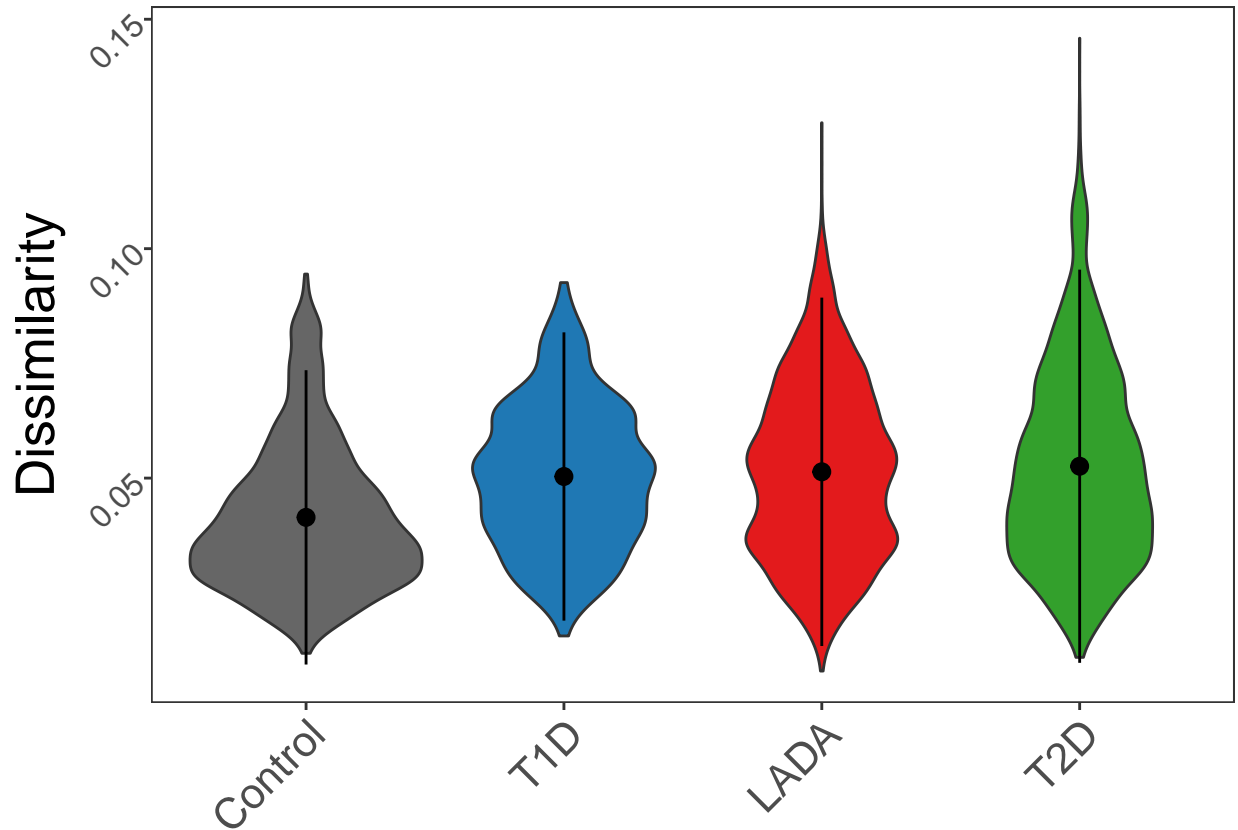

```
pdf(paste("MicroLADA_ViolinDissiCompWithin_Func", ".pdf", sep=""), width=12, height=6)
violinDissi
dev.off()
```

```
## pdf
## 2
```

```
#Save plot i previous list
Fig1List[[ "DissiBrayHel" ]] <- violinDissi
```

```
#Kruskal test
kruskal.test(value ~ Compare, data=meltPwBC)
```

```
##
## Kruskal-Wallis rank sum test
##
## data: value by Compare
## Kruskal-Wallis chi-squared = 956.99, df = 3, p-value < 2.2e-16
```

```
#If significant Mann-Whitney pairwise post-test
pairwise.wilcox.test(meltPwBC$value, meltPwBC$Compare, p.adjust.method="bonferroni")
```

```
##
## Pairwise comparisons using Wilcoxon rank sum test with continuity rection
```

```
##
## data: meltPwBC$value and meltPwBC$Compare
##
##      Control T1D LADA
## T1D <2e-16  -  -
## LADA <2e-16  1  -
## T2D <2e-16  1  1
##
## P value adjustment method: bonferroni
```

## Violin plots Dissimilarities remove metformin

```
rm(list=setdiff(ls(), c("Metadata", "MetadataMed", "Feature", "TaxonomyDA", "Taxonomy",
                        "Fig1List", "Fig1ListRemMet")))
##Removing treated with metformin
#Metadata$Metformin <- ifelse(is.na(Metadata$Metformin), "Unknown", Metadata$Metformin)
Metadata2<-filter(Metadata, !Metformin == 1)
##Applying subsetting to OTU tables
Taxonomy2<-dplyr::select(Taxonomy, one_of(as.character(Metadata2$MicrobiomeID)))
##Remove orgs that are not present after subsetting.
Taxonomy2 <- Taxonomy2[rowSums(Taxonomy2)>0,]

##Create long format of dissimilarities
#Multi dimensional scaling
distmatrix <- vegdist(decostand(t(Taxonomy2), method="hellinger"), method="bray")

#Contains all values except the ones equal to 0
meltPwBC<-subset(melt(as.matrix(distmatrix)))
rm(distmatrix) #Have comparisons of both 1vs2 and 2vs1 ..., but are removed during the
               #following filtration.
               #The same applies to comparisons of the same sample with itself

LADA_V <- subset(Metadata2, Diagnosis=="LADA") %>% dplyr::select(one_of("MicrobiomeID")) %>%
  pull(MicrobiomeID) %>% droplevels()
T1D_V <- subset(Metadata2, Diagnosis=="T1D") %>% dplyr::select(one_of("MicrobiomeID")) %>%
  pull(MicrobiomeID) %>% droplevels()
T2D_V <- subset(Metadata2, Diagnosis=="T2D") %>% dplyr::select(one_of("MicrobiomeID")) %>%
  pull(MicrobiomeID) %>% droplevels()
Control_V <- subset(Metadata2, Diagnosis=="Control") %>% dplyr::select(one_of("MicrobiomeID")) %>%
  pull(MicrobiomeID) %>% droplevels()

meltPwBC$Compare <- ifelse (meltPwBC$Var1 %in% LADA_V & meltPwBC$Var2 %in% T1D_V,
                           "LADA vs T1D",
                           ifelse (meltPwBC$Var1 %in% LADA_V & meltPwBC$Var2 %in% T2D_V,
                                     "LADA vs T2D",
                                     ifelse (meltPwBC$Var1 %in% LADA_V & meltPwBC$Var2 %in% Control_V,
                                             "LADA vs Control",
                                             ifelse (meltPwBC$Var1 %in% T1D_V & meltPwBC$Var2 %in% T2D_V,
                                                     "T1D vs T2D",
```

```

        ifelse (meltPwBC$Var1 %in% T1D_V & meltPwBC$Var2 %in% Control_V,
                "T1D vs Control",
        ifelse (meltPwBC$Var1 %in% T2D_V & meltPwBC$Var2 %in% Control_V,
                "T2D vs Control", "hmmmmmm"))))))
##Control validation
#table((meltPwBC$Var1 %in% LADA_V) & (meltPwBC$Var2 %in% T1D_V))
#table(meltPwBC$Compare)

meltPwBC<-subset(meltPwBC, meltPwBC$Compare!="hmmmmmm")

#Defining the order, can change if needed
meltPwBC$Compare<-factor(meltPwBC$Compare,
                        levels= c("LADA vs T1D", "LADA vs T2D", "LADA vs Control",
                                   "T1D vs T2D", "T1D vs Control", "T2D vs Control"))

violinDissi<-ggplot(meltPwBC, aes(x=Compare, y=value)) +
  geom_violin(trim=FALSE, fill="purple", colour="purple") +
  stat_summary(fun.data="mean_sdl", mult=1, #mean ± a constant (mult=1) times the st.dev
              geom="pointrange", width=0.2 ) +
  #geom_dotplot(binaxis='y', stackdir='center', dotsize=0.01) +
  labs(x="", y="Dissimilarity") +
  theme_bw() +
  theme(legend.position="none", panel.grid.major = element_blank(),
        panel.grid.minor = element_blank())

violinDissi

```

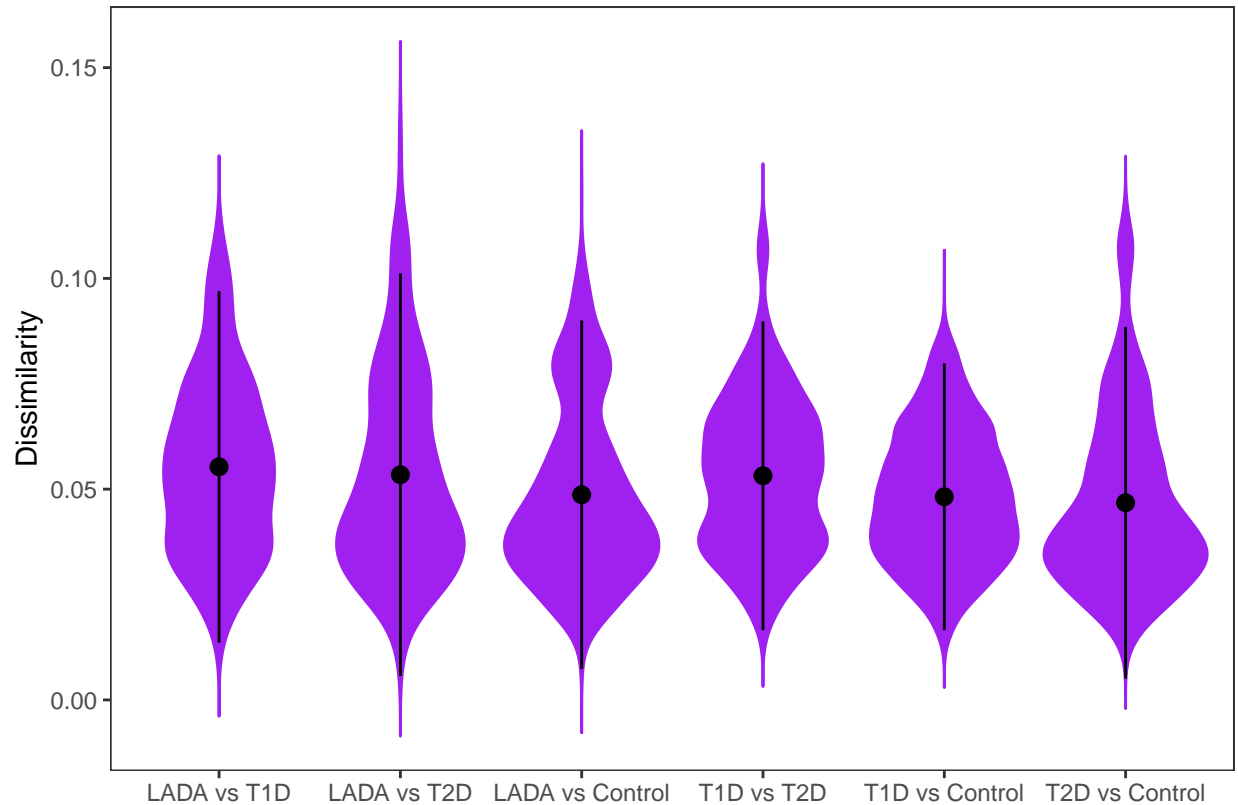

```
pdf(paste("MicroLADA_ViolinDissiRemMet_Func", ".pdf", sep=""), width=12, height=6)
violinDissi
dev.off()
```

```
## pdf
## 2
```

```
#Kruskal test
kruskal.test(value ~ Compare, data=meltPwBC)
```

```
##
## Kruskal-Wallis rank sum test
##
## data: value by Compare
## Kruskal-Wallis chi-squared = 127.43, df = 5, p-value < 2.2e-16
```

```
#If significant Mann-Whitney pairwise post-test
pairwise.wilcox.test(meltPwBC$value, meltPwBC$Compare, p.adjust.method="bonferroni")
```

```
##
## Pairwise comparisons using Wilcoxon rank sum test with continuity correction
##
## data: meltPwBC$value and meltPwBC$Compare
##
```

```
##          LADA vs T1D LADA vs T2D LADA vs Control T1D vs T2D
## LADA vs T2D      1.00000      -          -          -
## LADA vs Control  1.0e-06      0.18745      -          -
## T1D vs T2D      1.00000      1.00000      4.3e-07      -
## T1D vs Control  2.9e-07      0.74973      0.93469      7.2e-08
## T2D vs Control  3.7e-13      0.00025      0.15655      < 2e-16
##          T1D vs Control
## LADA vs T2D      -
## LADA vs Control  -
## T1D vs T2D      -
## T1D vs Control  -
## T2D vs Control  1.3e-07
##
## P value adjustment method: bonferroni
```

```
#####
##Create long format of dissimilarities
##Multi dimensional scaling
dismatrix <- vegdist(decostand(t(Taxonomy2), method="hellinger"), method="bray")

#Contains all values except the ones equal to 0
meltPwBC<-subset(melt(as.matrix(dismatrix)), value!=0)
#meltPwBC<-subset(melt(as.matrix(dismatrix)))
rm(dismatrix) #Have comparisons of both 1vs2 and 2vs1 ..., but are removed during the
              #following filtration.
              #The same applies to comparisons of the same sample with itself

LADA_V <- subset(Metadata2, Diagnosis=="LADA") %>% dplyr::select(one_of("MicrobiomeID")) %>%
  pull(MicrobiomeID) #>% droplevels()
T1D_V <- subset(Metadata2, Diagnosis=="T1D") %>% dplyr::select(one_of("MicrobiomeID")) %>%
  pull(MicrobiomeID) #>% droplevels()
T2D_V <- subset(Metadata2, Diagnosis=="T2D") %>% dplyr::select(one_of("MicrobiomeID")) %>%
  pull(MicrobiomeID) #>% droplevels()
Control_V <- subset(Metadata2, Diagnosis=="Control") %>% dplyr::select(one_of("MicrobiomeID")) %>%
  pull(MicrobiomeID) #>% droplevels()

meltPwBC$Compare <- ifelse (meltPwBC$Var1 %in% LADA_V & meltPwBC$Var2 %in%
  LADA_V, "LADA",
  ifelse (meltPwBC$Var1 %in% T1D_V & meltPwBC$Var2 %in%
  T1D_V, "T1D",
  ifelse (meltPwBC$Var1 %in% T2D_V & meltPwBC$Var2 %in%
  T2D_V, "T2D",
  ifelse (meltPwBC$Var1 %in% Control_V & meltPwBC$Var2 %in%
  Control_V, "Control",
  ifelse (meltPwBC$Var1 %in% LADA_V & meltPwBC$Var2 %in%
  T1D_V, "LADA vs T1D",
  ifelse (meltPwBC$Var1 %in% LADA_V & meltPwBC$Var2 %in%
  T2D_V, "LADA vs T2D",
  ifelse (meltPwBC$Var1 %in% LADA_V & meltPwBC$Var2 %in%
  Control_V, "LADA vs Control",
  ifelse (meltPwBC$Var1 %in% T1D_V & meltPwBC$Var2 %in%
```

```

                T2D_V, "T1D vs T2D",
            ifelse (meltPwBC$Var1 %in% T1D_V & meltPwBC$Var2 %in%
                Control_V, "T1D vs Control",
            ifelse (meltPwBC$Var1 %in% T2D_V & meltPwBC$Var2 %in%
                Control_V, "T2D vs Control", "hmmmmmm")))))))))))
##Control validation
#table((meltPwBC$Var1 %in% LADA_V) & (meltPwBC$Var2 %in% T1D_V))
#table(meltPwBC$Compare)

meltPwBC<-subset(meltPwBC, meltPwBC$Compare!="hmmmmmm")

#Defining the order, can change if needed
meltPwBC$Compare<-factor(meltPwBC$Compare, levels= c("Control", "T1D",
                                                    "T2D", "LADA",
                                                    "LADA vs T1D", "LADA vs T2D",
                                                    "LADA vs Control", "T1D vs T2D",
                                                    "T1D vs Control", "T2D vs Control"))

violinDissi<-ggplot(meltPwBC, aes(x=Compare, y=value)) +
  geom_violin(trim=FALSE, fill="purple", colour="purple") +
  stat_summary(fun.data="mean_sdl", mult=1, #mean ± a constant (mult=1) times the st.dev
              geom="pointrange", width=0.2 ) +
  #geom_dotplot(binaxis='y', stackdir='center', dotsize=0.01) +
  labs(x="", y="Dissimilarity") +
  theme_bw() +
  theme(legend.position="none", panel.grid.major = element_blank(),
        panel.grid.minor = element_blank(),
        axis.text.x = element_text(angle = 45, hjust = 1))

violinDissi

```

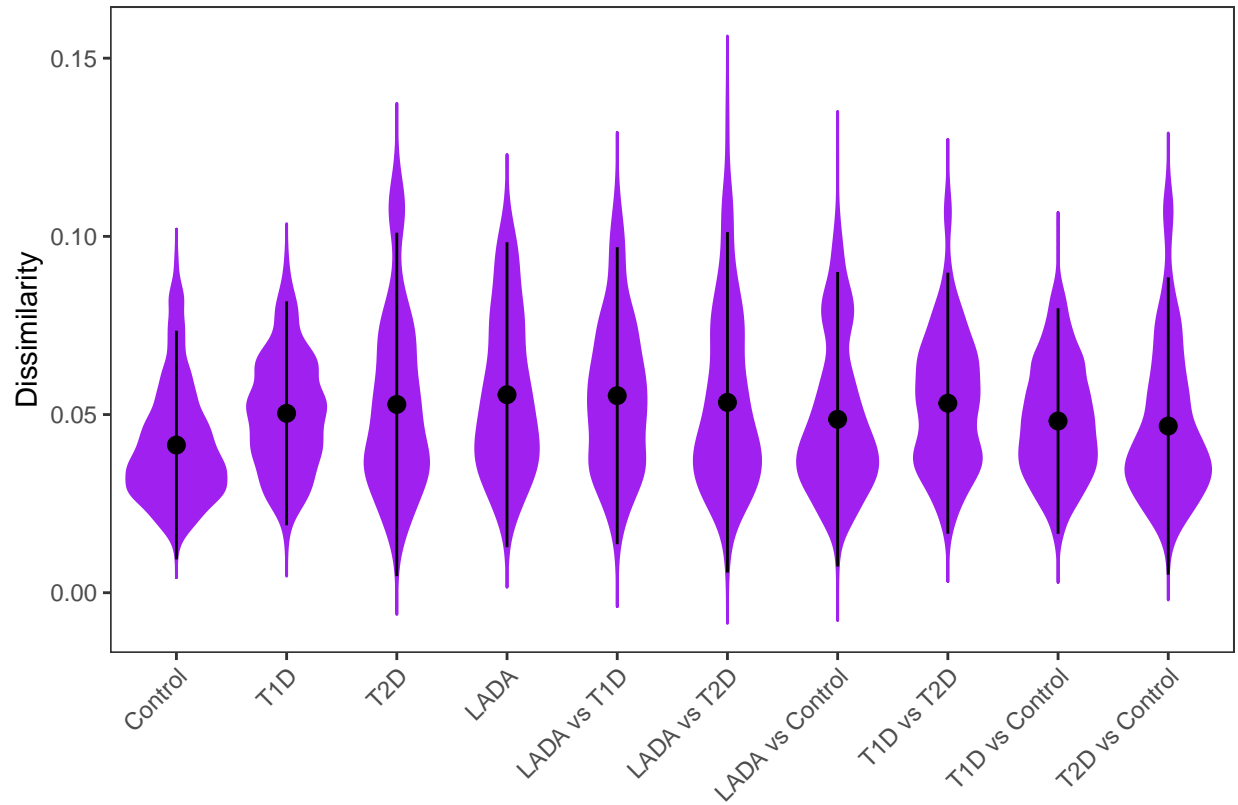

```
pdf(paste("MicroLADA_ViolinDissiAllCompRemMet_Func", ".pdf", sep=""), width=12, height=6)
violinDissi
dev.off()
```

```
## pdf
## 2
```

```
#Kruskal test
kruskal.test(value ~ Compare, data=meltPwBC)
```

```
##
## Kruskal-Wallis rank sum test
##
## data: value by Compare
## Kruskal-Wallis chi-squared = 735.77, df = 9, p-value < 2.2e-16
```

```
#If significant Mann-Whitney pairwise post-test
pairwise.wilcox.test(meltPwBC$value, meltPwBC$Compare, p.adjust.method="bonferroni")
```

```
##
## Pairwise comparisons using Wilcoxon rank sum test with continuity correction
##
## data: meltPwBC$value and meltPwBC$Compare
##
```

```

##           Control T1D      T2D      LADA      LADA vs T1D LADA vs T2D
## T1D       < 2e-16 -          -          -          -          -
## T2D       < 2e-16 1.00000 -          -          -          -
## LADA      5.3e-13 1.00000 1.00000 -          -          -
## LADA vs T1D < 2e-16 0.04614 0.72305 1.00000 -          -
## LADA vs T2D 1.8e-14 1.00000 1.00000 1.00000 1.00000 -
## LADA vs Control < 2e-16 0.00180 0.36234 0.01401 3.1e-06 0.56234
## T1D vs T2D < 2e-16 0.32609 1.00000 1.00000 1.00000 1.00000
## T1D vs Control < 2e-16 0.03779 1.00000 0.03832 8.6e-07 1.00000
## T2D vs Control 3.3e-13 9.3e-12 3.0e-05 4.9e-05 1.1e-12 0.00076
##           LADA vs Control T1D vs T2D T1D vs Control
## T1D       -                -                -
## T2D       -                -                -
## LADA      -                -                -
## LADA vs T1D -                -                -
## LADA vs T2D -                -                -
## LADA vs Control -                -                -
## T1D vs T2D 1.3e-06          -                -
## T1D vs Control 1.00000          2.1e-07          -
## T2D vs Control 0.46964          < 2e-16          3.8e-07
##
## P value adjustment method: bonferroni

```

```

#####
meltPwBC<-filter(meltPwBC,
  Compare == "Control" | Compare == "T1D" |
  Compare == "T2D" | Compare == "LADA")

meltPwBC$Compare<-ordered(meltPwBC$Compare,
  levels=c("Control", "T1D", "LADA", "T2D"))

violinDissi<-ggplot(meltPwBC, aes(x=Compare, y=value)) +
  geom_violin(aes(fill=Compare, trim=FALSE)) +
  stat_summary(fun.data="mean_sdl", mult=1, #mean ± a constant (mult=1) times the st.dev
  geom="pointrange", width=0.2 ) +
  labs(y="Dissimilarity") +
  scale_fill_manual(values=c(Control = "#666666", T1D = "#1F78B4",
  T2D = "#33A02C", LADA = "#E31A1C")) +
  theme_bw() +
  theme(legend.position="none", panel.grid.major = element_blank(),
  panel.grid.minor = element_blank(), axis.title=element_text(size=20),
  axis.title.x = element_blank(),
  axis.text.x = element_text(angle = 45, hjust = 1, size=16),
  axis.text.y = element_text(angle = 45, hjust = 1, size=12))

violinDissi

```



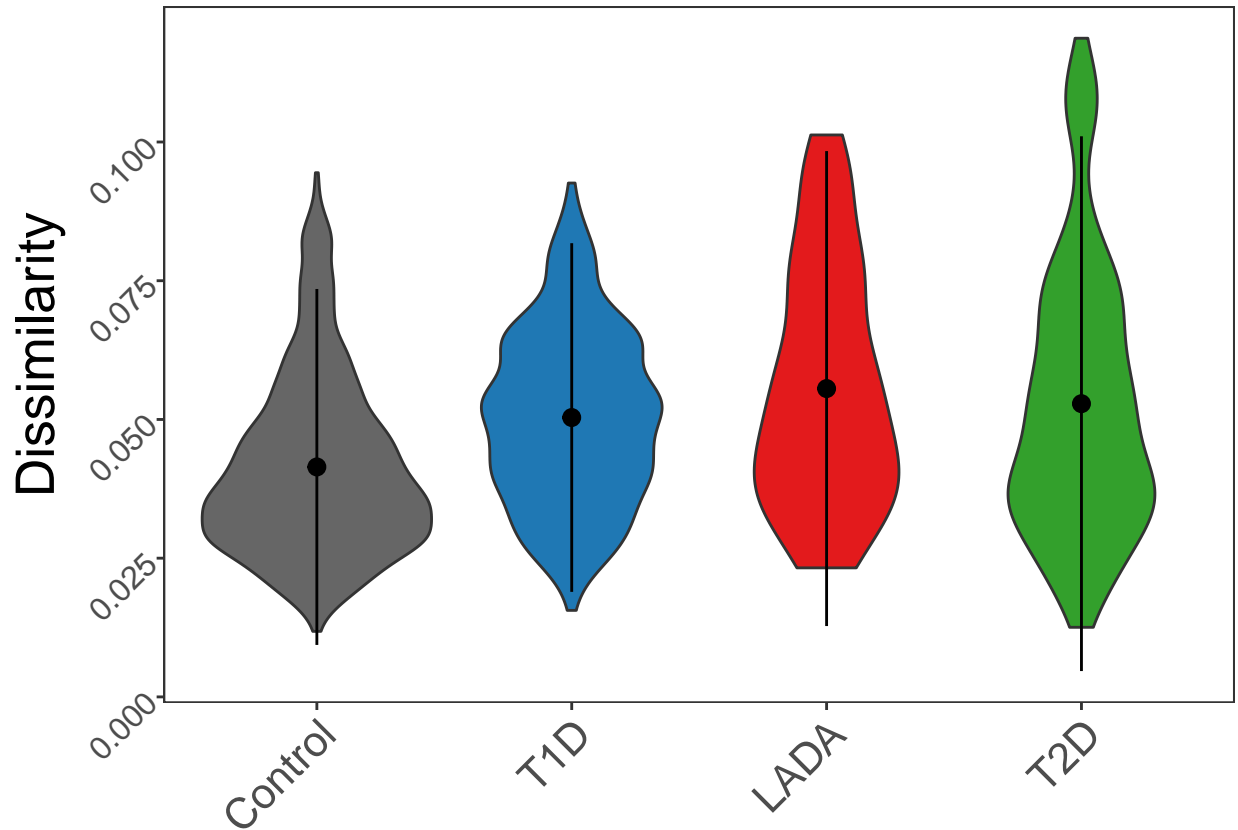

```
pdf(paste("MicroLADA_ViolinDissiCompWithinRemMet_Func", ".pdf", sep=""), width=12, height=6)
violinDissi
dev.off()
```

```
## pdf
## 2
```

```
#Save plot in previous list
FigListRemMet[[ "DissiBrayHel" ]] <- violinDissi
```

```
#Kruskal test
kruskal.test(value ~ Compare, data=meltPwBC)
```

```
##
## Kruskal-Wallis rank sum test
##
## data: value by Compare
## Kruskal-Wallis chi-squared = 360.41, df = 3, p-value < 2.2e-16
```

```
#If significant Mann-Whitney pairwise post-test
pairwise.wilcox.test(meltPwBC$value, meltPwBC$Compare, p.adjust.method="bonferroni")
```

```
##
## Pairwise comparisons using Wilcoxon rank sum test with continuity correction
```

```
##
## data: meltPwBC$value and meltPwBC$Compare
##
##      Control T1D  LADA
## T1D <2e-16  -    -
## LADA 7e-14  0.32 -
## T2D <2e-16  1.00 0.61
##
## P value adjustment method: bonferroni
```

## PCoA

Part of figure 1

```
rm(list=setdiff(ls(), c("Metadata", "MetadataMed", "Feature", "TaxonomyDA", "Taxonomy",
                        "Fig1List", "Fig1ListRemMet")))

Subset <- c("LADAControl", "LADAT1D", "LADAT2D", "All")
#i <- c("All")
#i <- c("LADAControl")
for (i in Subset) {

  #Subsetting Metadata according to
  if (i=="All") {
    print(i)
    Metadata2 <- Metadata
  } else if (i=="LADAControl") {
    print(i)
    Metadata2<-filter(Metadata, Diagnosis == "LADA" | Diagnosis == "Control")
  } else if (i=="LADAT1D") {
    print(i)
    Metadata2<-filter(Metadata, Diagnosis == "LADA" | Diagnosis == "T1D")
  } else if (i=="LADAT2D") {
    print(i)
    Metadata2<-filter(Metadata, Diagnosis == "LADA" | Diagnosis == "T2D")
  } else {
    print("Subset defined not valid")
  }

  #Apply subsetting to Taxonomy table
  Taxonomy2<-dplyr::select(Taxonomy, one_of(as.character(Metadata2$MicrobiomeID)))

  #Hellinger transformation
  Taxonomy2 <- data.frame(t(decostand(t(Taxonomy2), method="hellinger")))
  #Maks TSS
  Taxonomy2<-sweep(Taxonomy2, 2, colSums(Taxonomy2), FUN="/")
  #Dissimilarity
  distmatrix <- vegdist(t(Taxonomy2), method="bray")
  #Multi dimensional scaling with capscale
  PCoAcsObject<-capscale(distmatrix~1)
```

```

##Add eig to plot axes. with cmdscale there are negative values not with capscale
eig <- PCoAcsObject$CA$eig
# Calculate the variation explained by PCoA1, 2, 3 and 4
# and use it to generate axis labels
eig_1_2 <- eig[1:4] / sum(eig) * 100 #Vector with variance explained
# by the first 4 axes
eig_1 <- paste("PCoA1", round(eig_1_2[1], digits = 2), "% variance")
eig_2 <- paste("PCoA2", round(eig_1_2[2], digits = 2), "% variance")
eig_3 <- paste("PCoA3", round(eig_1_2[3], digits = 2), "% variance")
eig_4 <- paste("PCoA4", round(eig_1_2[4], digits = 2), "% variance")

##Pull out coordinates for plotting from the ca object
#Structuring to add to Metadata2
PCoACA<-PCoAcsObject$CA #The ca object contains the actual ordination results:
#u ((Weighted) orthonormal site scores),
#v ((Weighted) orthonormal species scores) all na in mine (unconstrained),
#Xbar (The standardized data matrix after previous stages of analysis),
#and imaginary.u.eig ???.
#Info http://cc.oulu.fi/~jarioksa/softhelp/vegan/html/cca.object.html
PCoA<-as.data.frame(PCoACA$u)
#Change colnames. Now add dis and trans info to names
colnames(PCoA) <- c("MDS1BrayHel", "MDS2BrayHel", "MDS3BrayHel", "MDS4BrayHel")
#Add row names to df
PCoA$MicrobiomeID <- row.names(PCoA)
#Remove leading X
PCoA$MicrobiomeID <- gsub("X", "", PCoA$MicrobiomeID)
#Merge according to Sample
Metadata2<-merge(Metadata2, PCoA, by="MicrobiomeID")

#PCoA MDS1 and MDS2 pdf
pdf(paste("MicroLADA_PCoA", i, "_Func.pdf", sep=""), width=9, height=6)
print(ggplot(Metadata2) +
  geom_point(aes(x=MDS1BrayHel, y=MDS2BrayHel, color = Diagnosis,
                group = Diagnosis), size=3) +
  stat_ellipse(aes(MDS1BrayHel, y=MDS2BrayHel, color = Diagnosis,
                  group = Diagnosis)) +
  scale_color_manual(values=c(Control = "#666666", T1D = "#1F78B4",
                              T2D = "#33A02C", LADA = "#E31A1C"))) +
  ggtitle(paste("PCoA", i, sep=" ")) +
  labs(colour="Diagnosis", x = eig_1, y = eig_2) +
  theme_bw() +
  theme(panel.grid.major = element_blank(), panel.grid.minor = element_blank(),
        axis.title=element_text(size=12), legend.position="bottom"))
dev.off()

#PCoA MDS1 and MDS2 plotly
print(ggplotly(ggplot(Metadata2[, c(6,8,13,14)]) +
  geom_point(aes(x=MDS1BrayHel, y=MDS2BrayHel, color = Diagnosis,
                group = Dg_LADA), size=3) +
  stat_ellipse(aes(MDS1BrayHel, y=MDS2BrayHel, color = Diagnosis,
                  group = Diagnosis)) +
  scale_color_manual(values=c(Control = "#666666", T1D = "#1F78B4",
                              T2D = "#33A02C", LADA = "#E31A1C")))

```

```

                T2D = "#33A02C", LADA = "#E31A1C")) +
ggtitle(paste("PCoA", i, sep=" ")) +
labs(colour="Diagnosis", x = eig_1, y = eig_2) +
theme_bw() +
theme(panel.grid.major = element_blank(), panel.grid.minor = element_blank(),
      axis.title=element_text(size=12), legend.position="bottom"))

#PCoA MDS1 and MDS2
print(ggplot(Metadata2) +
      geom_point(aes(x=MDS1BrayHel, y=MDS2BrayHel, color = Diagnosis,
                    group = Diagnosis), size=3) +
      stat_ellipse(aes(MDS1BrayHel, y=MDS2BrayHel, color = Diagnosis,
                      group = Diagnosis)) +
      scale_color_manual(values=c(Control = "#666666", T1D = "#1F78B4",
                                   T2D = "#33A02C", LADA = "#E31A1C")) +
ggtitle(paste("PCoA", i, sep=" ")) +
labs(colour="Diagnosis", x = eig_1, y = eig_2) +
theme_bw() +
theme(panel.grid.major = element_blank(), panel.grid.minor = element_blank(),
      axis.title=element_text(size=12), legend.position="bottom"))

#PCoA MDS1 and MDS3
print(ggplot(Metadata2) +
      geom_point(aes(x=MDS1BrayHel, y=MDS3BrayHel, color = Diagnosis,
                    group = Diagnosis), size=3) +
      stat_ellipse(aes(MDS1BrayHel, y=MDS3BrayHel, color = Diagnosis,
                      group = Diagnosis)) +
      scale_color_manual(values=c(Control = "#666666", T1D = "#1F78B4",
                                   T2D = "#33A02C", LADA = "#E31A1C")) +
ggtitle(paste("PCoA", i, sep=" ")) +
labs(colour="Diagnosis", x = eig_1, y = eig_3) +
theme_bw() +
theme(panel.grid.major = element_blank(), panel.grid.minor = element_blank(),
      axis.title=element_text(size=12), legend.position="bottom"))

#PCoA MDS2 and MDS3
print(ggplot(Metadata2) +
      geom_point(aes(x=MDS2BrayHel, y=MDS3BrayHel, color = Diagnosis,
                    group = Diagnosis), size=3) +
      stat_ellipse(aes(MDS2BrayHel, y=MDS3BrayHel, color = Diagnosis,
                      group = Diagnosis)) +
      scale_color_manual(values=c(Control = "#666666", T1D = "#1F78B4",
                                   T2D = "#33A02C", LADA = "#E31A1C")) +
ggtitle(paste("PCoA", i, sep=" ")) +
labs(colour="Diagnosis", x = eig_2, y = eig_3) +
theme_bw() +
theme(panel.grid.major = element_blank(), panel.grid.minor = element_blank(),
      axis.title=element_text(size=12), legend.position="bottom"))

#Add a categorical indicator of group in Metadata
Metadata2$Metformine<-as.factor(ifelse(grepl("1", Metadata2$Metformin), "Yes",
                                       ifelse(grepl("0", Metadata2$Metformin),
                                               "No", "Unknown")))

```

```

#Order Treatment metformine for plotting
Metadata2$Metformine <- factor(Metadata2$Metformine, levels=c("Yes", "No", "Unknown"))
#Create PCoA for figure 1
if (i=="All") {
  PCoAall<-ggplot(Metadata2) +
  geom_point(aes(MDS1BrayHel, MDS2BrayHel, color = Diagnosis, #shape = Metformine,
                group = Diagnosis), size=5) +
  stat_ellipse(aes(MDS1BrayHel, MDS2BrayHel, color = Diagnosis, group = Diagnosis)) +
  #stat_ellipse(aes(MDS1BrayHel, MDS2BrayHel, group = Metformine,
  #                linetype=factor(Metadata2$Metformine)), alpha = 0.7) +
  scale_color_manual(values=c(Control = "#666666", T1D = "#1F78B4",
                              T2D = "#33A02C", LADA = "#E31A1C")) +
  scale_shape_manual(values=c(3, 16)) +
  scale_linetype_manual(values=c("longdash", "dotted"), guide=FALSE) +
  #ggtitle(paste("PCoA", "LADA & T2D Metformin", sep=" ")) +
  labs(colour="Diagnosis", x = eig_1, y = eig_2) + #, shape="Metformin treatment"
  theme_bw() +
  theme(panel.grid.major = element_blank(), panel.grid.minor = element_blank(),
        axis.title=element_text(size=22), legend.position="bottom",
        legend.title=element_text(size=20), legend.text=element_text(size=20),
        axis.text.x = element_text(angle = 45, hjust = 1, size=12),
        axis.text.y = element_text(angle = 45, hjust = 1, size=12))

  print(PCoAall)
  pdf("MicroLADA_PCoAallMet_Func.pdf", width=9, height=6)
  print(PCoAall)
  dev.off()
  #Save plot in previous list
  Fig1List[[ "PCoAall" ]] <- PCoAall
  #return(PCoAall)
}

##Stressplot
##Extract ordination distances and merge with observed dissimilarity
#stress<-stressplot(PCoAcsObject)
#df <- melt(as.matrix(stress))
#names(df)<-c("rowOrd", "colOrd", "OrdDist")
#df<-filter(df, OrdDist>0)
#df2 <- melt(as.matrix(distmatrix))
#names(df2)<-c("rowObs", "colObs", "ObsDism")
#df2<-filter(df2, ObsDism>0)
#df<-unite(df, mergecol, c(rowOrd, colOrd), remove=FALSE)
#df2<-unite(df2, mergecol, c(rowObs, colObs), remove=FALSE)
#ggstress<-merge(df, df2, by="mergecol")

##create stressplot
#print(ggplot(ggstress) +
#  # geom_point(aes(ObsDism, OrdDist)) +
#  # ggtitle(paste("Stressplot", i, sep=" ")) +
#  # labs(x = "Observed dissimilarity", y = "Ordination distance") +
#  # theme_bw() +
#  # theme(panel.grid.major = element_blank(), panel.grid.minor = element_blank(),
#  #       axis.title=element_text(size=12)))

```

```

##Screeplot
#screeplot<-data.frame(PCoAcsObject$CA$eig)
#colnames(screeplot)<-c("eig")
#screeplot$eig <- screeplot$eig[1:length(screeplot$eig)] /
# sum(screeplot$eig) * 100
#screeplot<-add_rownames(screeplot, "MDS")
#screeplot$MDS <- factor(screeplot$MDS,
#                         levels=c(sprintf("MDS%d", 1:length(screeplot$eig))))

##create screeplot
#print(ggplot(screeplot, aes(x=MDS, y=eig)) +
#      # geom_bar(stat="identity") +
#      # labs(x ="MDS", y ="eig (%)") +
#      # ggtitle(paste("Screeplot", i, sep=" ")) +
#      # theme_bw() +
#      # theme(panel.grid.major = element_blank(), panel.grid.minor = element_blank(),
#      #       axis.title=element_text(size=12), axis.text.x=element_blank(),
#      #       axis.ticks.x=element_blank()))
}

```

```
## [1] "LADAControl"
```

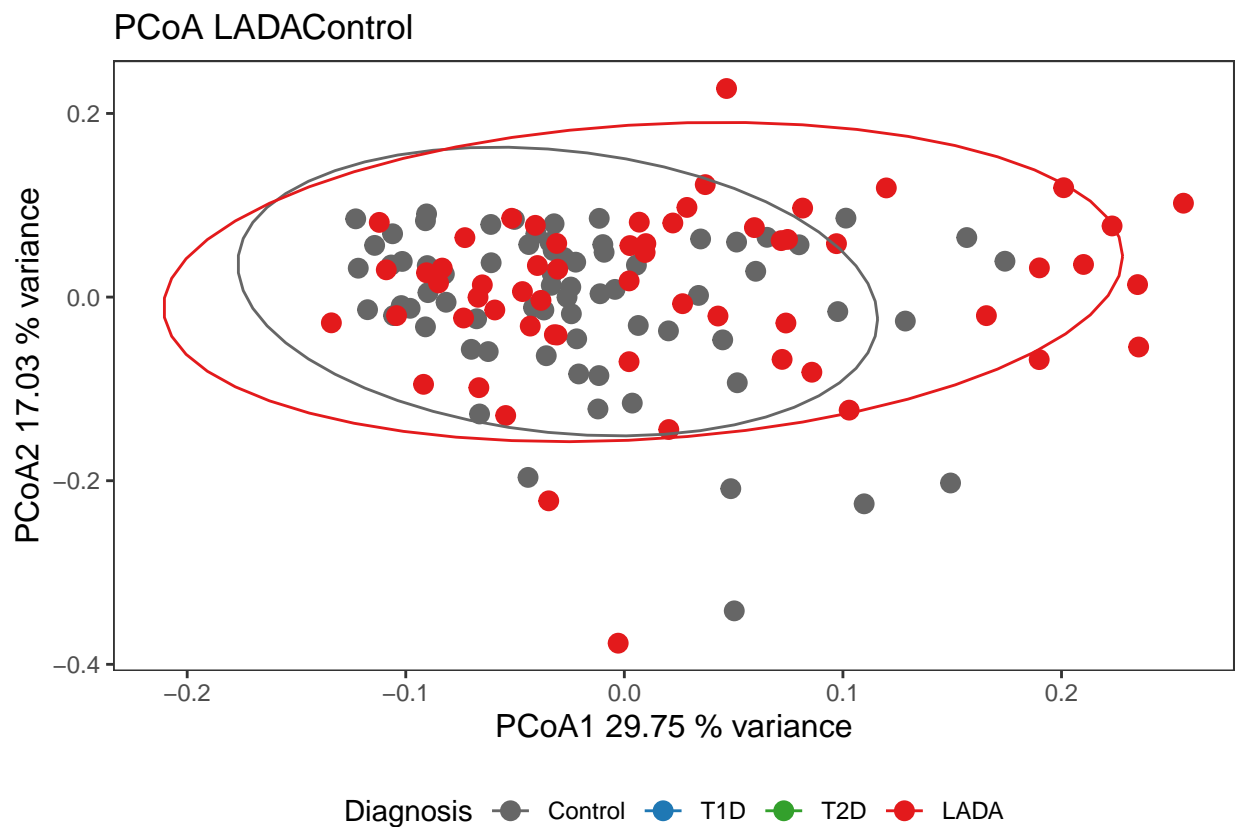

PCoA LADAControl

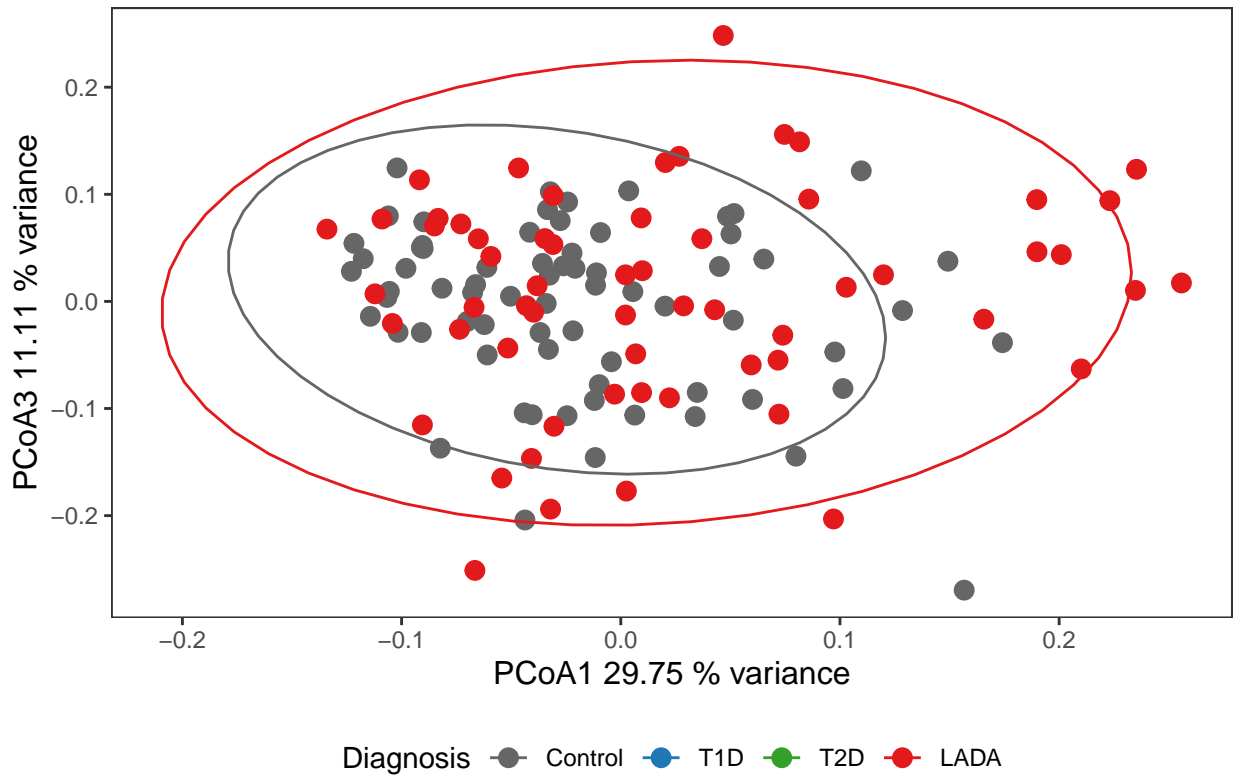

```
## [1] "LADAT1D"
```

PCoA LADAControl

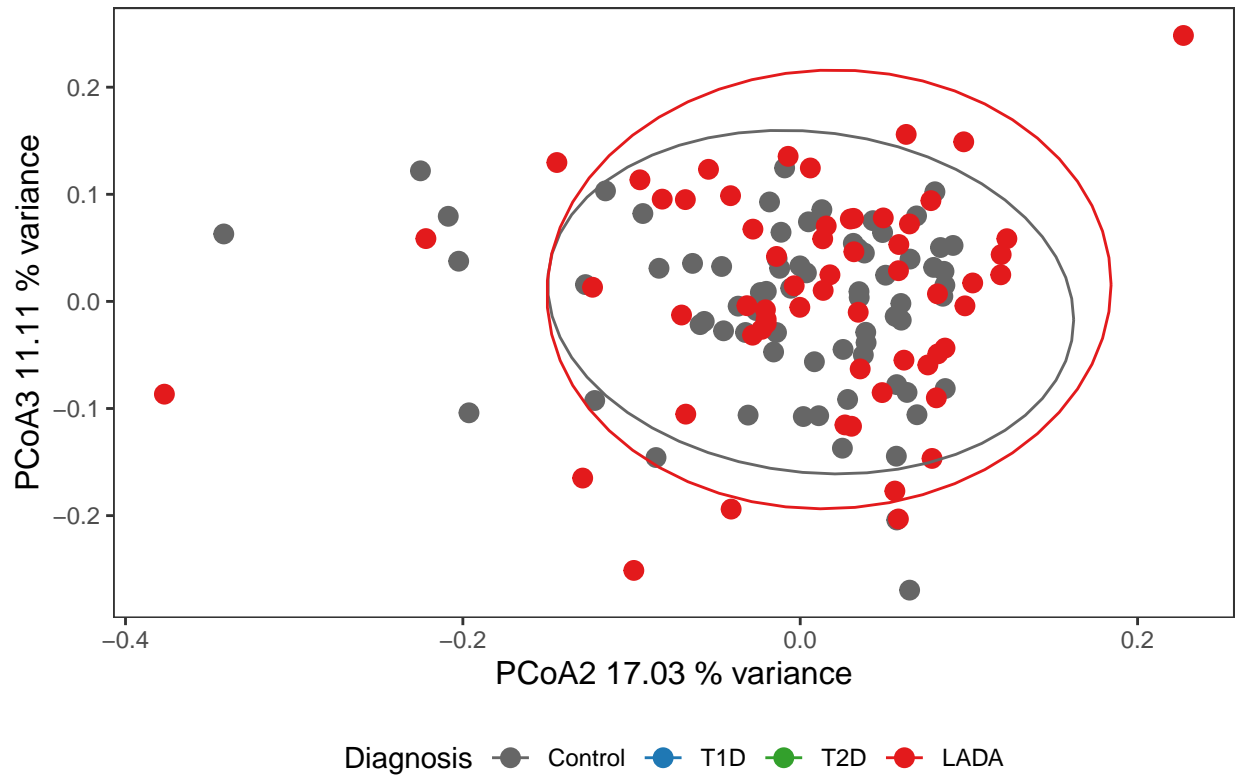



PCoA LADAT1D

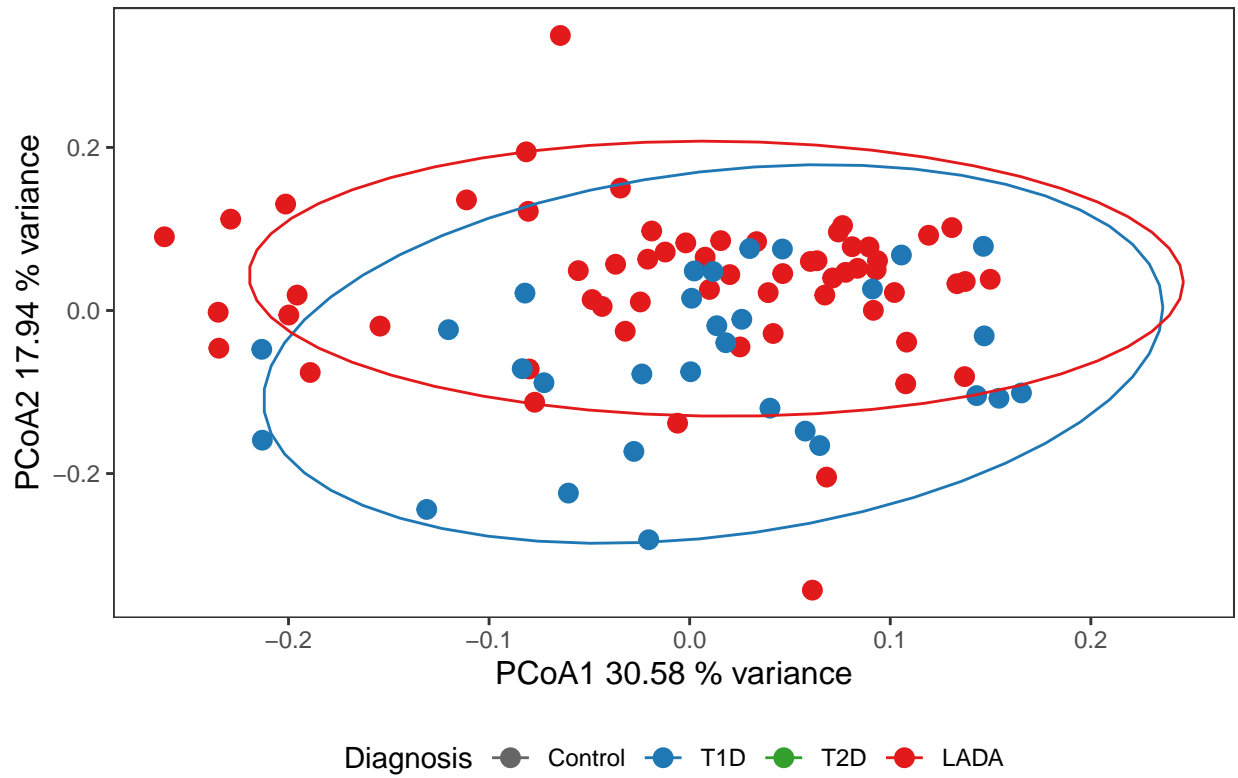

PCoA LADAT1D

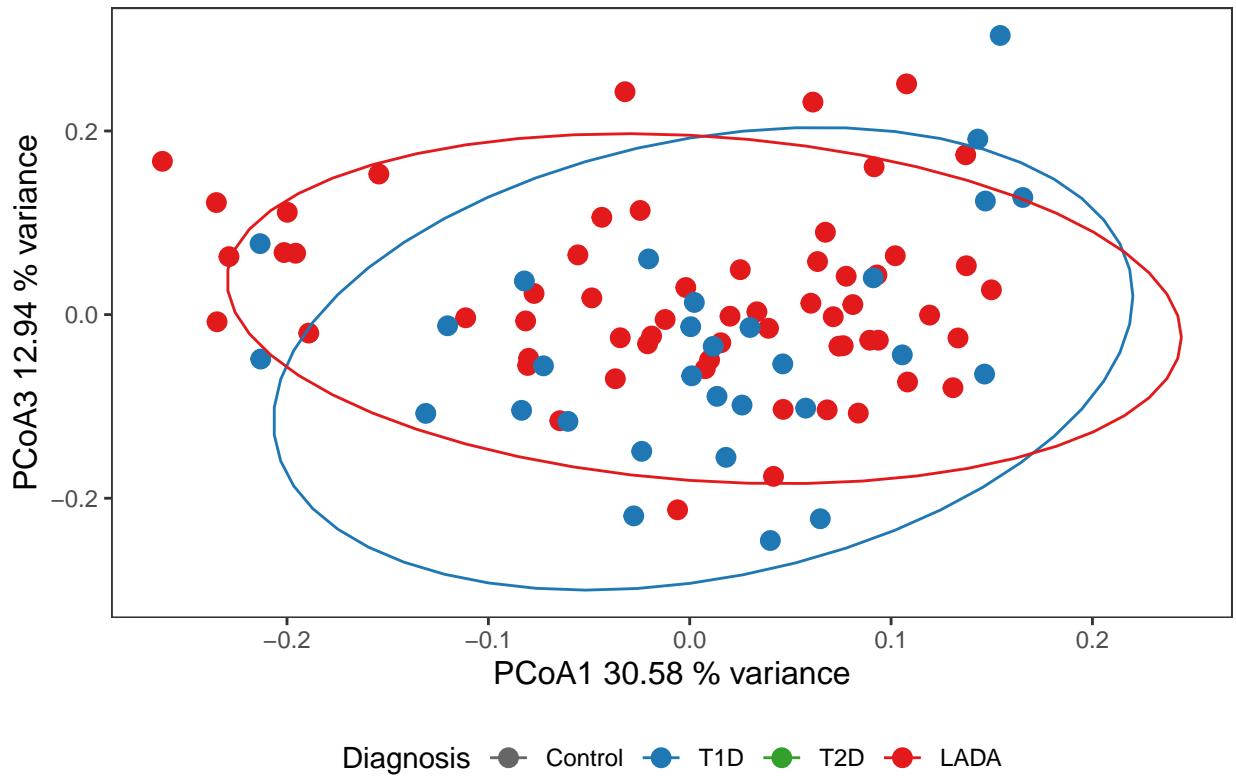

```
## [1] "LADAT2D"
```

PCoA LADAT1D

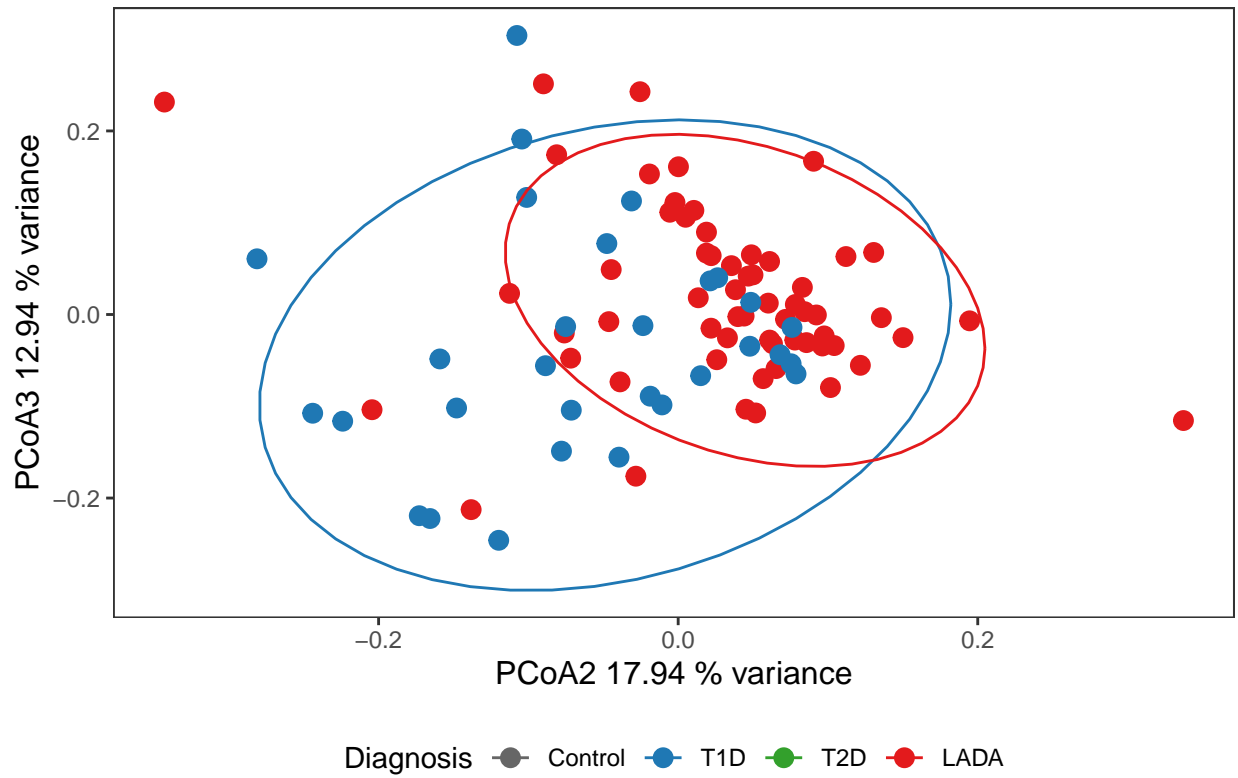

PCoA LADAT2D

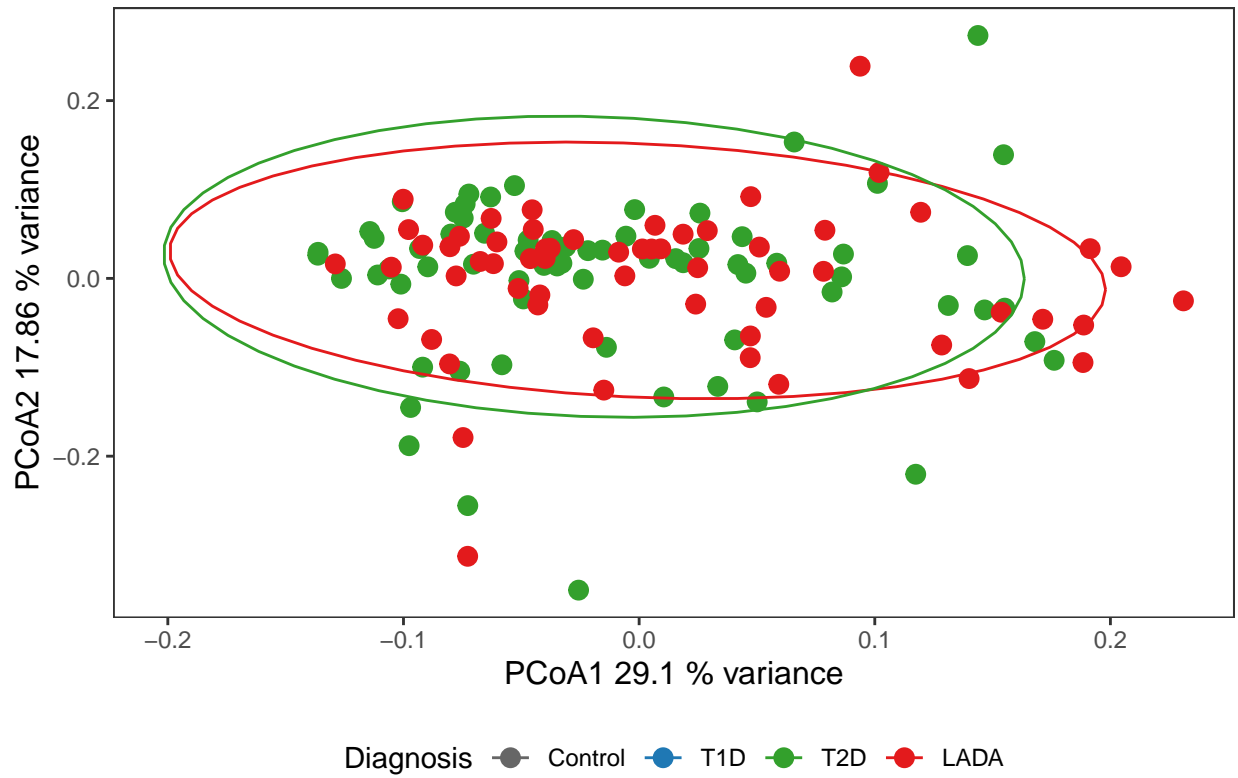

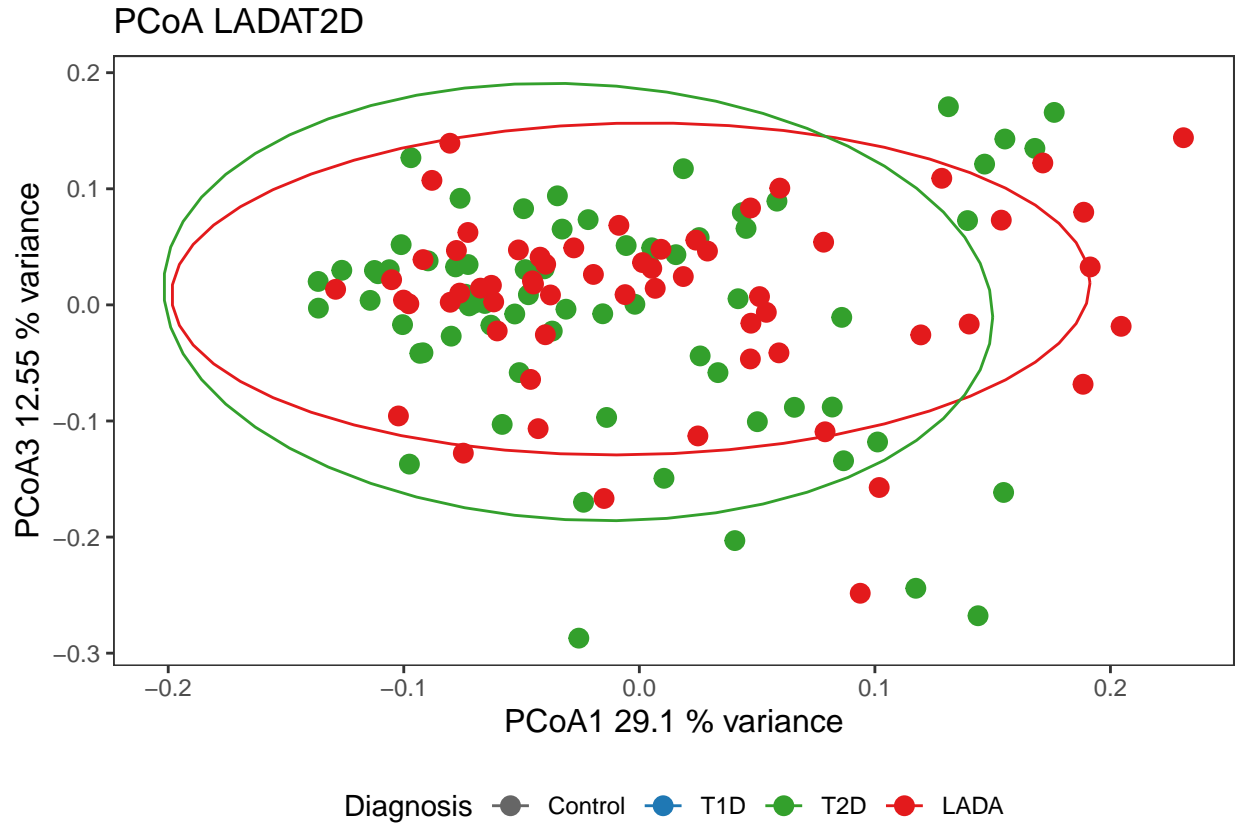

```
## [1] "All"
```

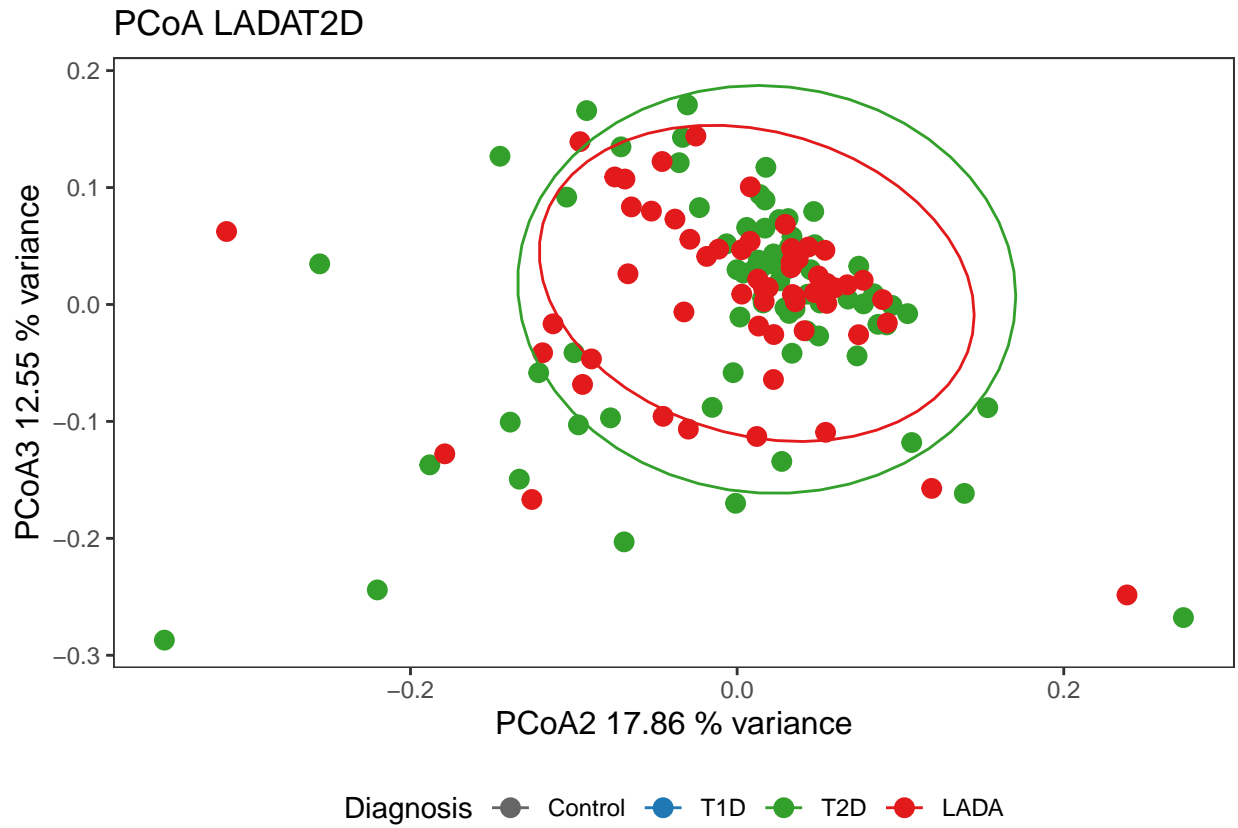

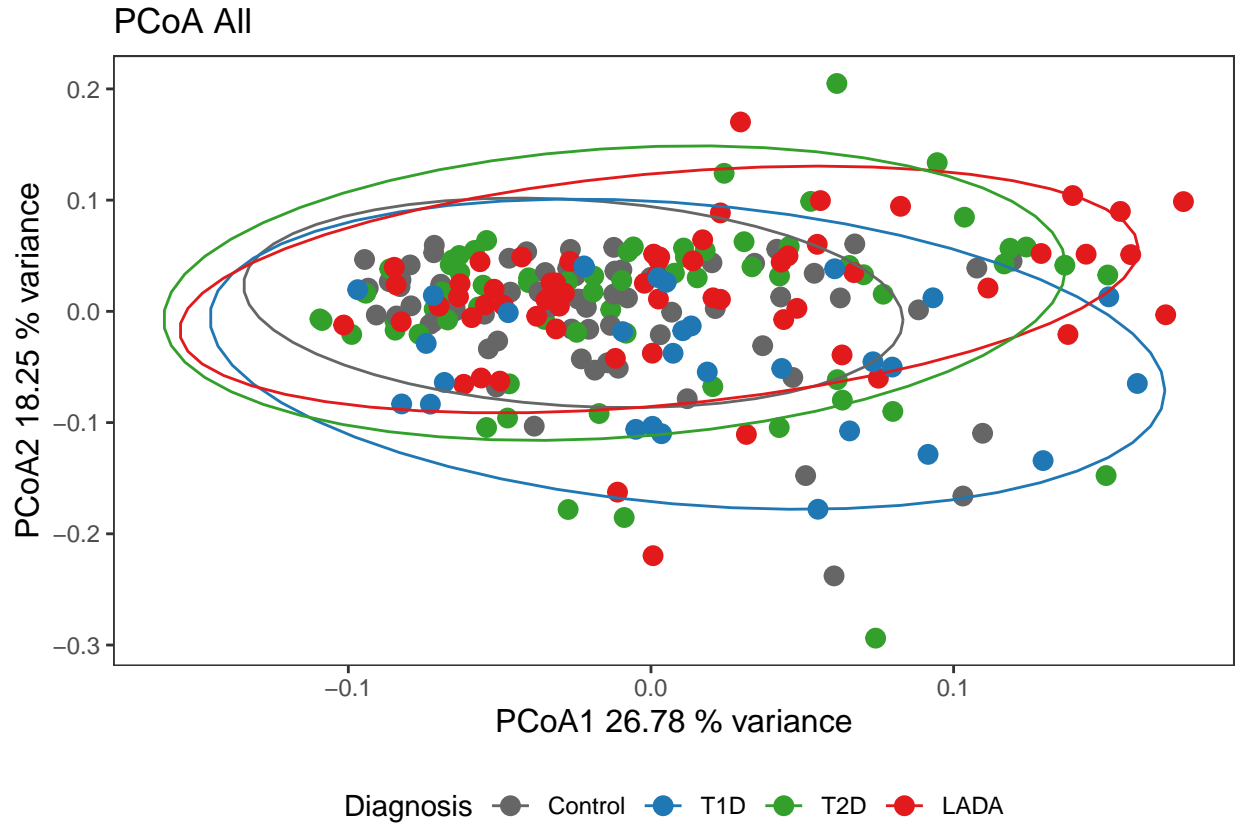

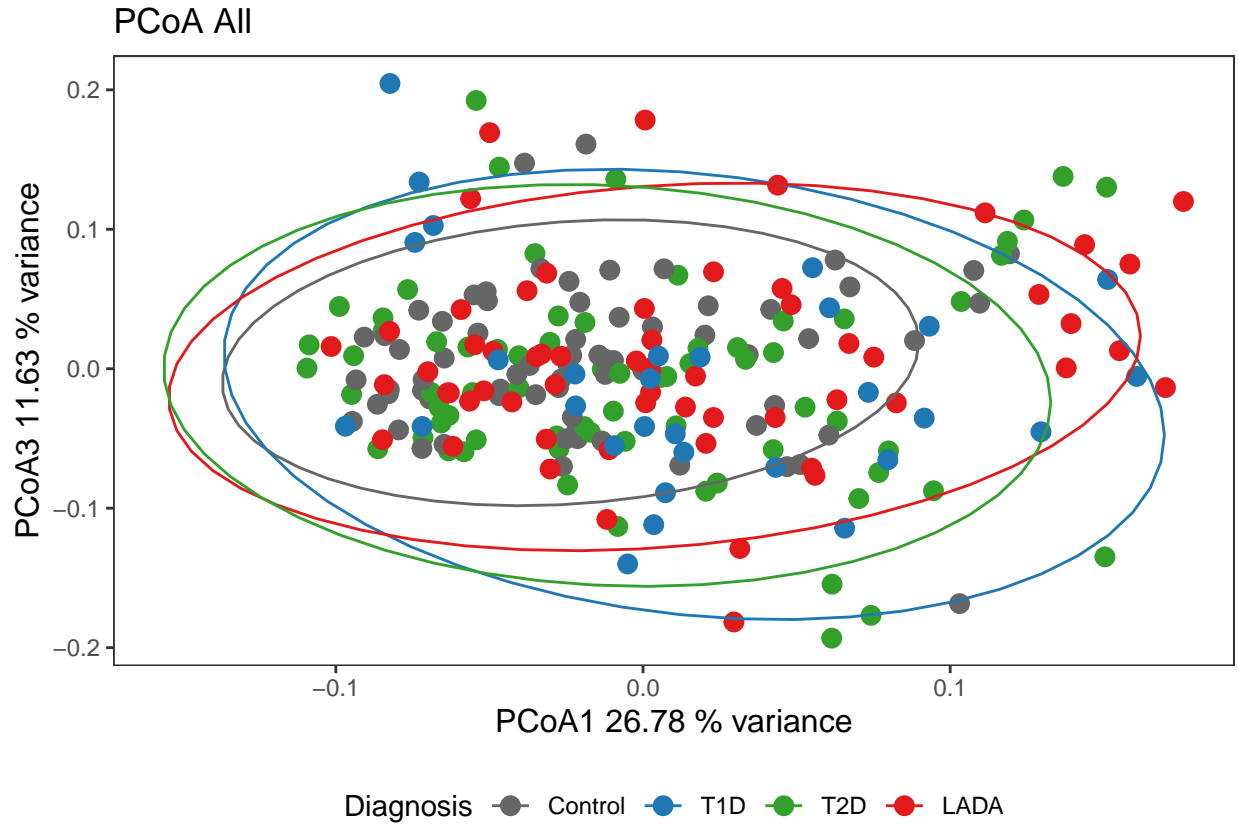



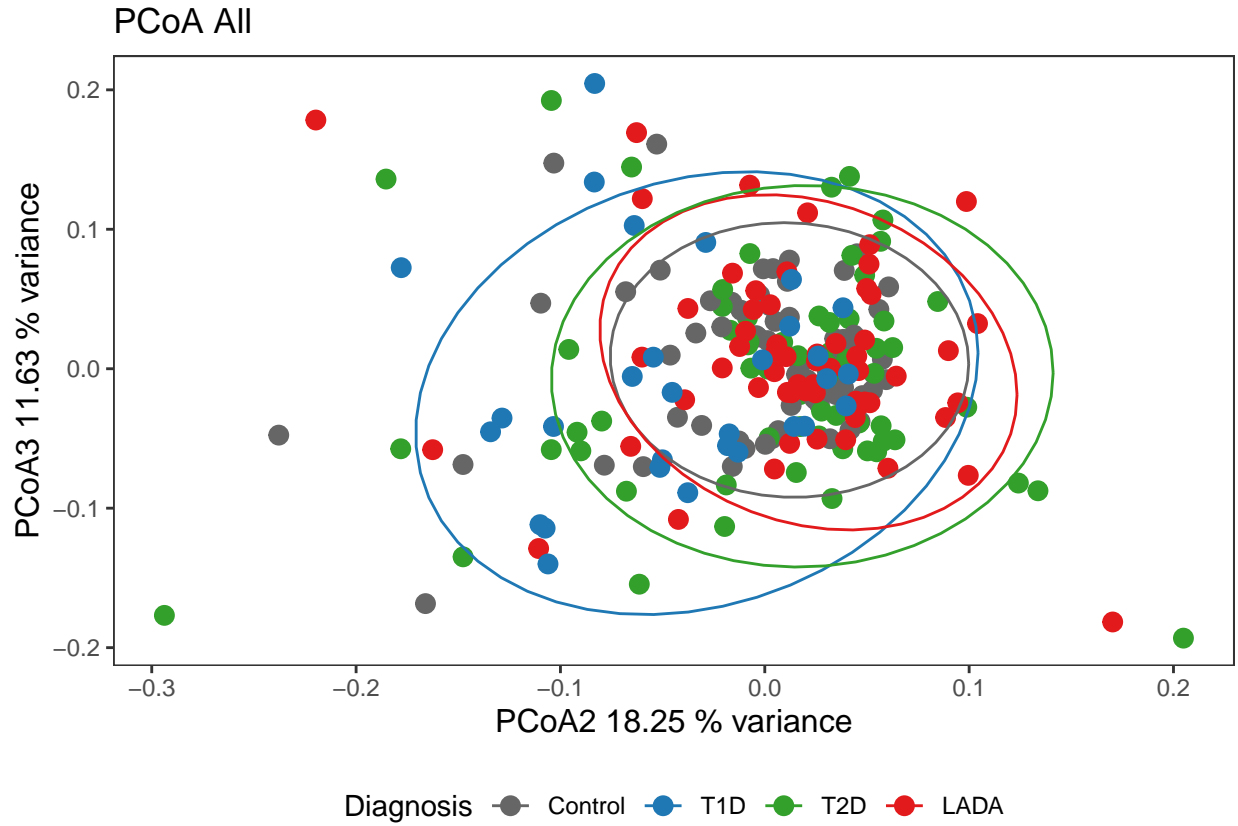

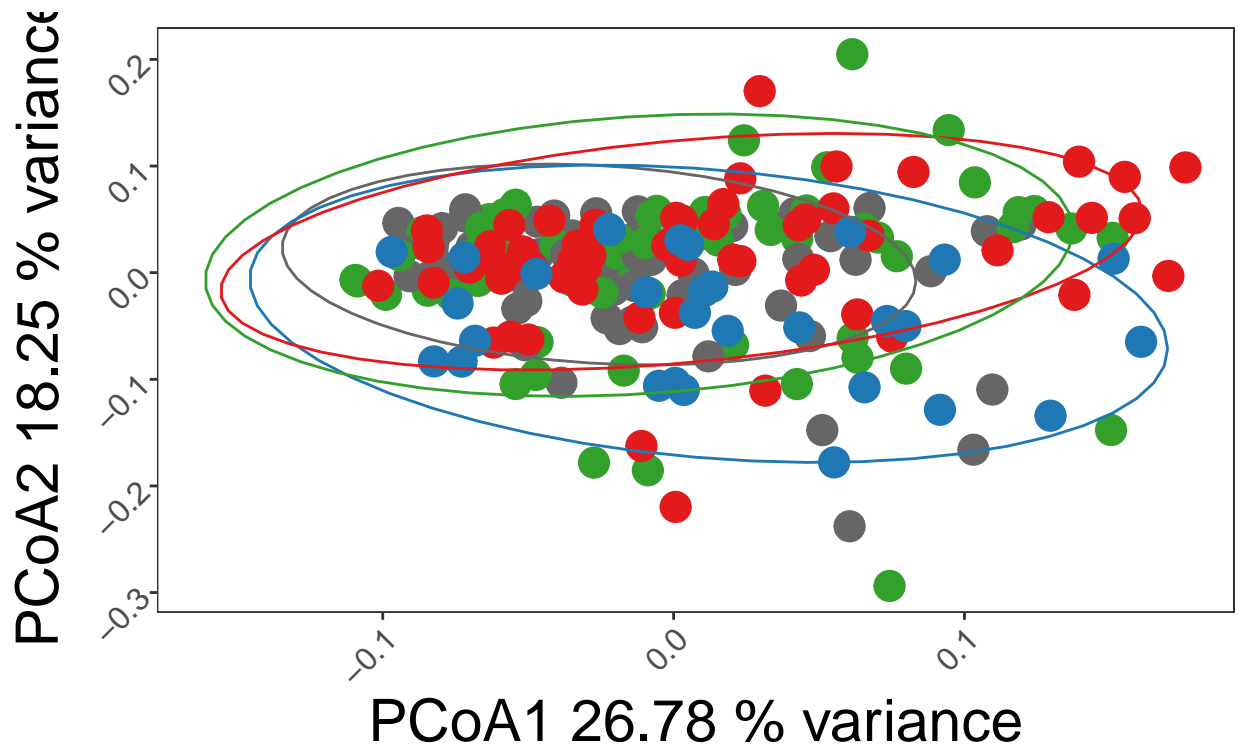

Diagnosis ● Control ● T1D ● T2D ● LADA

#### PCoA remove metformin

```
rm(list=setdiff(ls(), c("Metadata", "MetadataMed", "Feature", "TaxonomyDA", "Taxonomy",
                        "Fig1List", "Fig1ListRemMet")))
##Removing treated with metformin
#Metadata$Metformin <- ifelse(is.na(Metadata$Metformin), "Unknown", Metadata$Metformin)
Metadata2<-filter(Metadata, !Metformin == 1)
##Applying subsetting to OTU tables
Taxonomy2<-dplyr::select(Taxonomy, one_of(as.character(Metadata2$MicrobiomeID)))
##Remove orgs that are not present after subsetting.
Taxonomy2 <- Taxonomy2[rowSums(Taxonomy2)>0,]

Subset <- c("LADAControl", "LADAT1D", "LADAT2D", "All")
#i <- c("All")
#i <- c("LADAControl")
for (i in Subset) {

#Subsetting Metadata according to
if (i=="All") {
  print(i)
  Metadata3 <- Metadata2
} else if (i=="LADAControl") {
  print(i)
  Metadata3<-filter(Metadata2, Diagnosis == "LADA" | Diagnosis == "Control")
}
```

```

} else if (i=="LADAT1D") {
  print(i)
  Metadata3<-filter(Metadata2, Diagnosis == "LADA" | Diagnosis == "T1D")
} else if (i=="LADAT2D") {
  print(i)
  Metadata3<-filter(Metadata2, Diagnosis == "LADA" | Diagnosis == "T2D")
} else {
  print("Subset defined not valid")
}

#Apply subsetting to Taxonomy table
Taxonomy3<-dplyr::select(Taxonomy2, one_of(as.character(Metadata3$MicrobiomeID)))

#Hellinger transformation
Taxonomy3 <- data.frame(t(decostand(t(Taxonomy3), method="hellinger")))
#Maks TSS
Taxonomy3<-sweep(Taxonomy3, 2, colSums(Taxonomy3), FUN="/")
#Dissimilarity
distmatrix <- vegdist(t(Taxonomy3), method="bray")
#Multi dimensional scaling with capscale
PCoAcsObject<-capscale(distmatrix~1)

##Add eig to plot axes. with cmdscale there are negative values not with capscale
eig <- PCoAcsObject$CA$eig
# Calculate the variation explained by PCoA1, 2, 3 and 4
# and use it to generate axis labels
eig_1_2 <- eig[1:4] / sum(eig) * 100 #Vector with variance explained
# by the first 4 axes
eig_1 <- paste("PCoA1", round(eig_1_2[1], digits = 2), "% variance")
eig_2 <- paste("PCoA2", round(eig_1_2[2], digits = 2), "% variance")
eig_3 <- paste("PCoA3", round(eig_1_2[3], digits = 2), "% variance")
eig_4 <- paste("PCoA4", round(eig_1_2[4], digits = 2), "% variance")

##Pull out coordinates for plotting from the ca object
#Structuring to add to Metadata2
PCoACA<-PCoAcsObject$CA #The ca object contains the actual ordination results:
#u ((Weighted) orthonormal site scores),
#v ((Weighted) orthonormal species scores) all na in mine (unconstrained),
#Xbar (The standardized data matrix after previous stages of analysis),
#and imaginary.u.eig ???.
#Info http://cc.oulu.fi/~jarioksa/softhelp/vegan/html/cca.object.html
PCoA<-as.data.frame(PCoACA$u)
#Change colnames. Now add dis and trans info to names
colnames(PCoA) <- c("MDS1BrayHel", "MDS2BrayHel", "MDS3BrayHel", "MDS4BrayHel")
#Add row names to df
PCoA$MicrobiomeID <- row.names(PCoA)
#Remove leading X
PCoA$MicrobiomeID <- gsub("X", "", PCoA$MicrobiomeID)
#Merge according to Sample
Metadata4<-merge(Metadata3, PCoA, by="MicrobiomeID")

```

```

#PCoA MDS1 and MDS2 pdf
pdf(paste("MicroLADA_PCoARemMet", i, "_Func.pdf", sep=""), width=9, height=6)
print(ggplot(Metadata4) +
  geom_point(aes(x=MDS1BrayHel, y=MDS2BrayHel, color = Diagnosis,
                group = Diagnosis), size=3) +
  stat_ellipse(aes(MDS1BrayHel, y=MDS2BrayHel, color = Diagnosis,
                  group = Diagnosis)) +
  scale_color_manual(values=c(Control = "#666666", T1D = "#1F78B4",
                              T2D = "#33A02C", LADA = "#E31A1C")) +
  ggtitle(paste("PCoA", i, sep=" ")) +
  labs(colour="Diagnosis", x = eig_1, y = eig_2) +
  theme_bw() +
  theme(panel.grid.major = element_blank(), panel.grid.minor = element_blank(),
        axis.title=element_text(size=12), legend.position="bottom"))
dev.off()

```

```

#PCoA MDS1 and MDS2 plotly
print(ggplotly(ggplot(Metadata4[, c(6,8,13,14)]) +
  geom_point(aes(x=MDS1BrayHel, y=MDS2BrayHel, color = Diagnosis,
                group = Dg_LADA), size=3) +
  stat_ellipse(aes(MDS1BrayHel, y=MDS2BrayHel, color = Diagnosis,
                  group = Diagnosis)) +
  scale_color_manual(values=c(Control = "#666666", T1D = "#1F78B4",
                              T2D = "#33A02C", LADA = "#E31A1C")) +
  ggtitle(paste("PCoA", i, sep=" ")) +
  labs(colour="Diagnosis", x = eig_1, y = eig_2) +
  theme_bw() +
  theme(panel.grid.major = element_blank(), panel.grid.minor = element_blank(),
        axis.title=element_text(size=12), legend.position="bottom")))

```

```

#PCoA MDS1 and MDS2
print(ggplot(Metadata4) +
  geom_point(aes(x=MDS1BrayHel, y=MDS2BrayHel, color = Diagnosis,
                group = Diagnosis), size=3) +
  stat_ellipse(aes(MDS1BrayHel, y=MDS2BrayHel, color = Diagnosis,
                  group = Diagnosis)) +
  scale_color_manual(values=c(Control = "#666666", T1D = "#1F78B4",
                              T2D = "#33A02C", LADA = "#E31A1C")) +
  ggtitle(paste("PCoA", i, sep=" ")) +
  labs(colour="Diagnosis", x = eig_1, y = eig_2) +
  theme_bw() +
  theme(panel.grid.major = element_blank(), panel.grid.minor = element_blank(),
        axis.title=element_text(size=12), legend.position="bottom"))

```

```

#PCoA MDS1 and MDS3
print(ggplot(Metadata4) +
  geom_point(aes(x=MDS1BrayHel, y=MDS3BrayHel, color = Diagnosis,
                group = Diagnosis), size=3) +
  stat_ellipse(aes(MDS1BrayHel, y=MDS3BrayHel, color = Diagnosis,
                  group = Diagnosis)) +
  scale_color_manual(values=c(Control = "#666666", T1D = "#1F78B4",
                              T2D = "#33A02C", LADA = "#E31A1C")) +
  ggtitle(paste("PCoA", i, sep=" ")) +

```

```

labs(colour="Diagnosis", x = eig_1, y = eig_3) +
theme_bw() +
theme(panel.grid.major = element_blank(), panel.grid.minor = element_blank(),
      axis.title=element_text(size=12), legend.position="bottom"))

#PCoA MDS2 and MDS3
print(ggplot(Metadata4) +
      geom_point(aes(x=MDS2BrayHel, y=MDS3BrayHel, color = Diagnosis,
                    group = Diagnosis), size=3) +
      stat_ellipse(aes(MDS2BrayHel, y=MDS3BrayHel, color = Diagnosis,
                      group = Diagnosis)) +
      scale_color_manual(values=c(Control = "#666666", T1D = "#1F78B4",
                                   T2D = "#33A02C", LADA = "#E31A1C")) +
      ggtitle(paste("PCoA", i, sep=" ")) +
      labs(colour="Diagnosis", x = eig_2, y = eig_3) +
      theme_bw() +
      theme(panel.grid.major = element_blank(), panel.grid.minor = element_blank(),
            axis.title=element_text(size=12), legend.position="bottom"))

#Add a categorical indicator of group in Metadata
Metadata4$Metformine<-as.factor(ifelse(grepl("1", Metadata4$Metformin), "Yes",
                                       ifelse(grepl("0", Metadata4$Metformin),
                                              "No", "Unknown")))

#Order Treatment metformine for plotting
Metadata4$Metformine <- factor(Metadata4$Metformine, levels=c("Yes", "No", "Unknown"))
#Create PCoA for figure 1
if (i=="All") {
  PCoAall<-ggplot(Metadata4) +
    geom_point(aes(MDS1BrayHel, MDS2BrayHel, color = Diagnosis, #shape = Metformine,
                  group = Diagnosis), size=5) +
    stat_ellipse(aes(MDS1BrayHel, MDS2BrayHel, color = Diagnosis, group = Diagnosis)) +
    #stat_ellipse(aes(MDS1BrayHel, MDS2BrayHel, group = Metformine,
    #                 linetype=factor(Metadata4$Metformine)), alpha = 0.7) +
    scale_color_manual(values=c(Control = "#666666", T1D = "#1F78B4",
                                   T2D = "#33A02C", LADA = "#E31A1C")) +
    scale_shape_manual(values=c(3, 16)) +
    scale_linetype_manual(values=c("longdash", "dotted"), guide=FALSE) +
    #ggtitle(paste("PCoA", "LADA & T2D Metformin", sep=" ")) +
    labs(colour="Diagnosis", x = eig_1, y = eig_2) + #, shape="Metformin treatment"
    theme_bw() +
    theme(panel.grid.major = element_blank(), panel.grid.minor = element_blank(),
          axis.title=element_text(size=22), legend.position="bottom",
          legend.title=element_text(size=20), legend.text=element_text(size=20),
          axis.text.x = element_text(angle = 45, hjust = 1, size=12),
          axis.text.y = element_text(angle = 45, hjust = 1, size=12))

  print(PCoAall)
  pdf("MicroLADA_PCoAAllMetRemMet_Func.pdf", width=9, height=6)
  print(PCoAall)
  dev.off()
  #Save plot in previous list
  Fig1ListRemMet[[ "PCoAall" ]] <- PCoAall
  #return(PCoAall)
}

```

```

}

##Stressplot
##Extract ordination distances and merge with observed dissimilarity
#stress<-stressplot(PCoAcsObject)
#df <- melt(as.matrix(stress))
#names(df)<-c("rowOrd", "colOrd", "OrdDist")
#df<-filter(df, OrdDist>0)
#df2 <- melt(as.matrix(distmatrix))
#names(df2)<-c("rowObs", "colObs", "ObsDism")
#df2<-filter(df2, ObsDism>0)
#df<-unite(df, mergecol, c(rowOrd, colOrd), remove=FALSE)
#df2<-unite(df2, mergecol, c(rowObs, colObs), remove=FALSE)
#ggstress<-merge(df, df2, by="mergecol")

##create stressplot
#print(ggplot(ggstress) +
#  geom_point(aes(ObsDism, OrdDist)) +
#  ggtitle(paste("Stressplot", i, sep=" ")) +
#  labs(x = "Observed dissimilarity", y = "Ordination distance") +
#  theme_bw() +
#  theme(panel.grid.major = element_blank(), panel.grid.minor = element_blank(),
#    axis.title=element_text(size=12)))

##Screeplot
#screeplot<-data.frame(PCoAcsObject$CA$eig)
#colnames(screeplot)<-c("eig")
#screeplot$eig <- screeplot$eig[1:length(screeplot$eig)] /
#  sum(screeplot$eig) * 100
#screeplot<-add_rownames(screeplot, "MDS")
#screeplot$MDS <- factor(screeplot$MDS,
#  levels=c(sprintf("MDS%d", 1:length(screeplot$eig))))

##create screeplot
#print(ggplot(screeplot, aes(x=MDS, y=eig)) +
#  geom_bar(stat="identity") +
#  labs(x ="MDS", y ="eig (%)") +
#  ggtitle(paste("Screeplot", i, sep=" ")) +
#  theme_bw() +
#  theme(panel.grid.major = element_blank(), panel.grid.minor = element_blank(),
#    axis.title=element_text(size=12), axis.text.x=element_blank(),
#    axis.ticks.x=element_blank()))
}

```

```
## [1] "LADAControl"
```

PCoA LADAControl

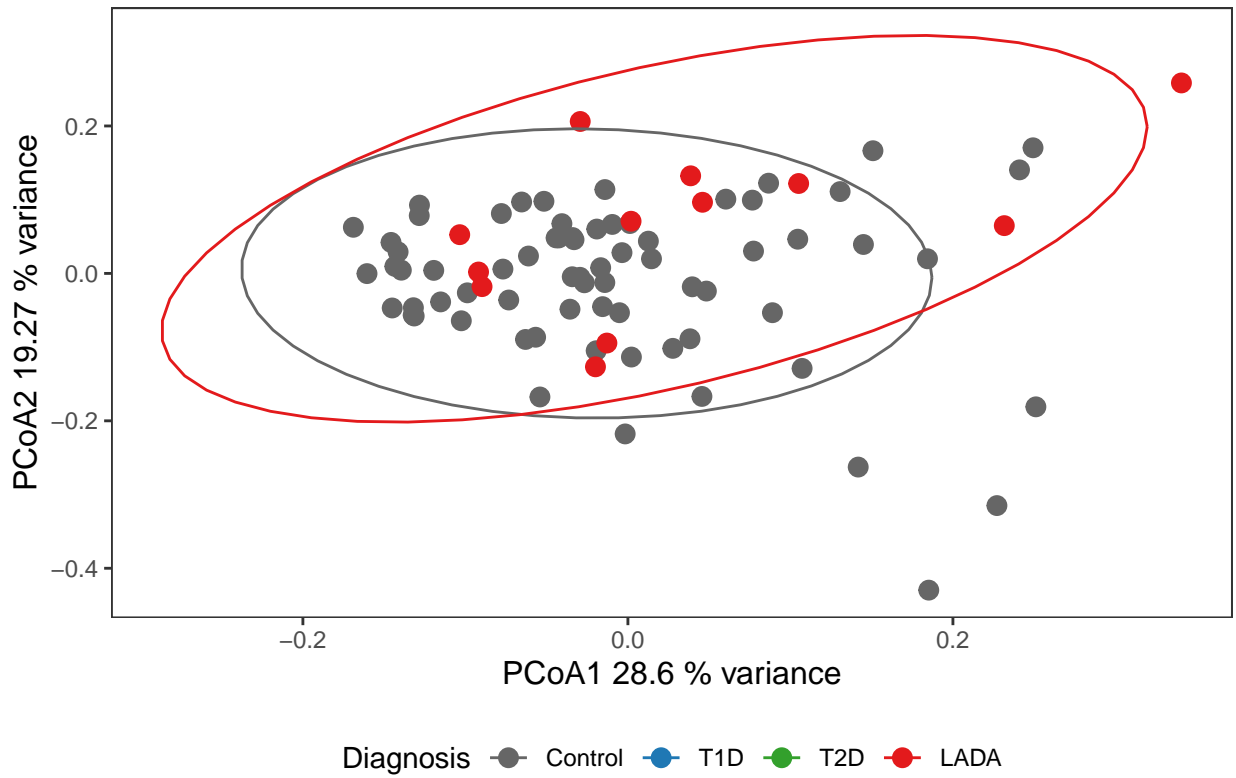

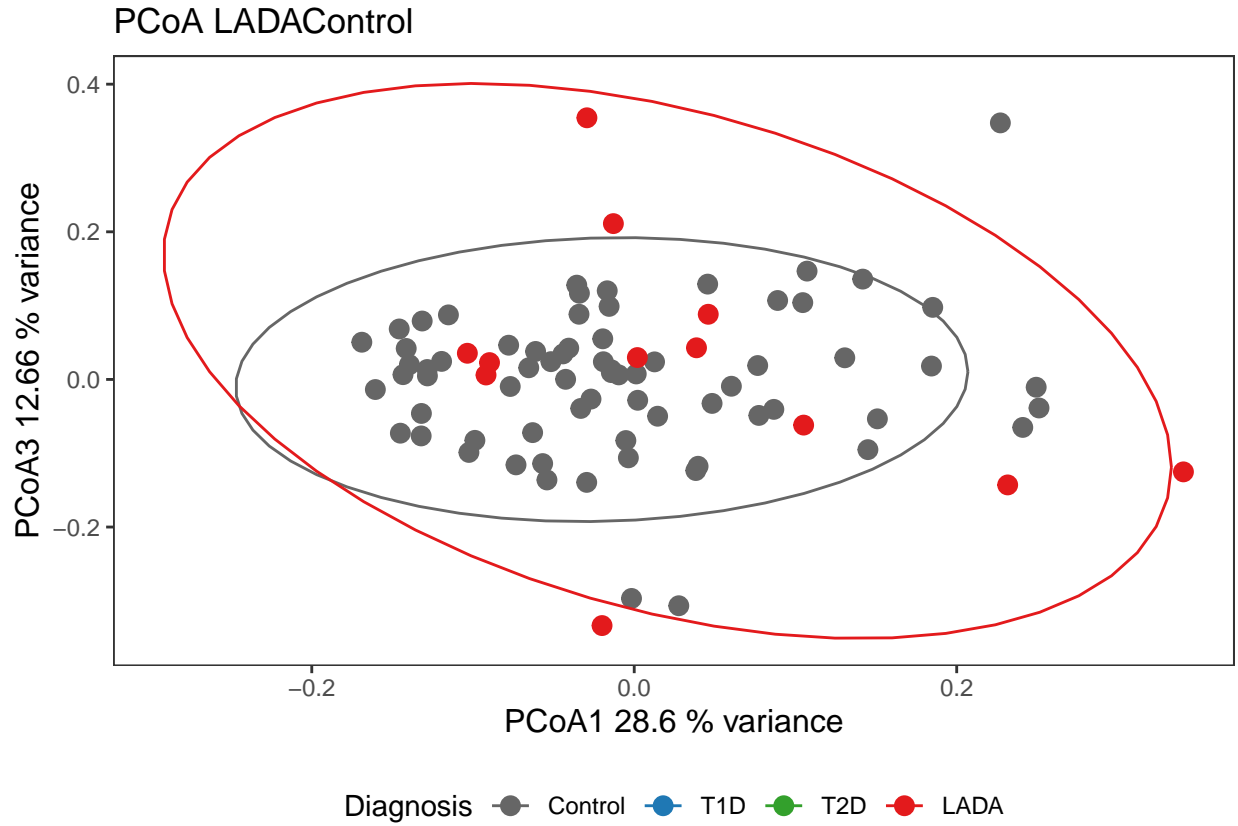

```
## [1] "LADAT1D"
```



PCoA LADAControl

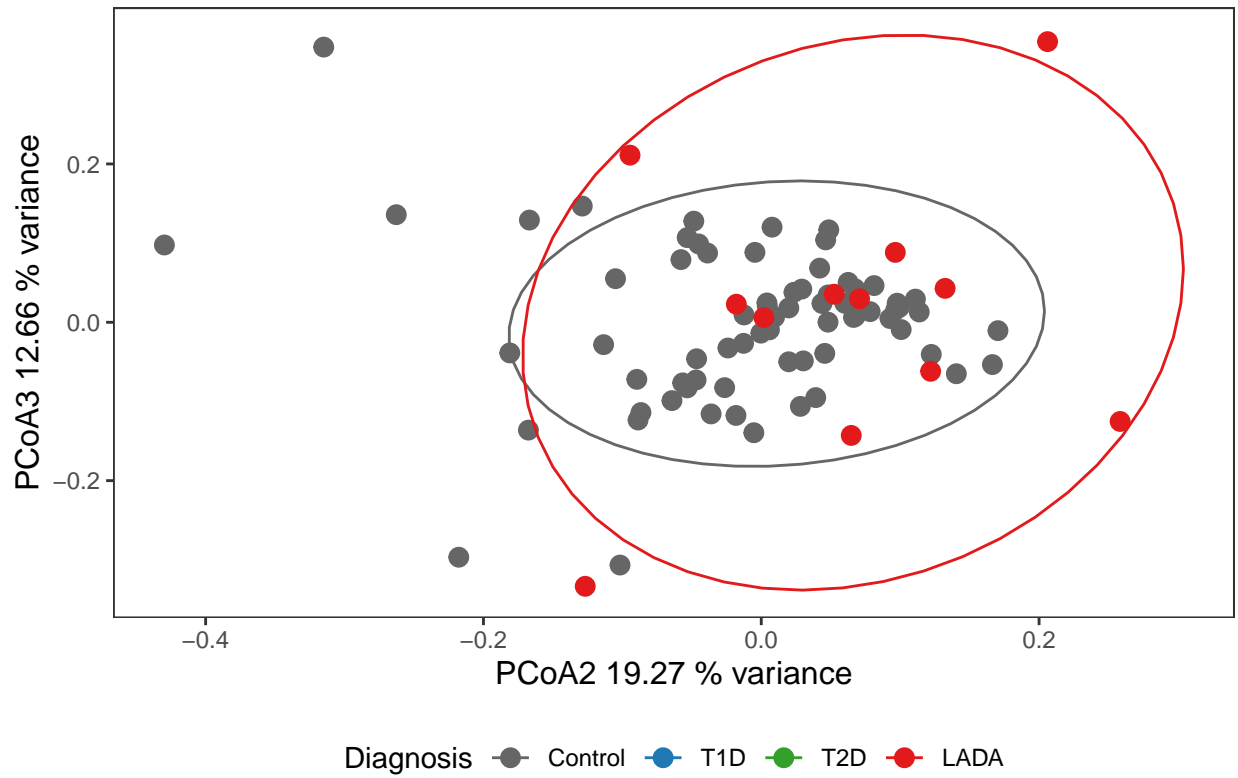

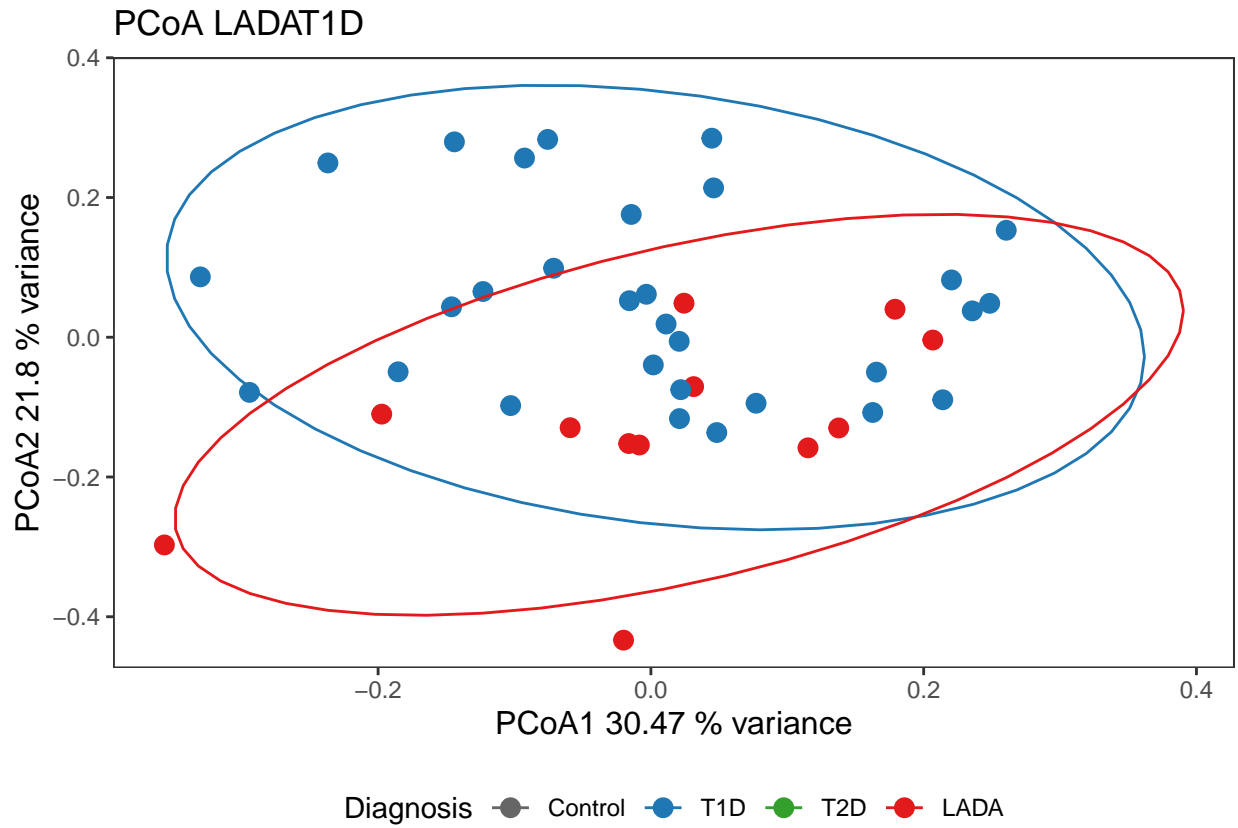

PCoA LADAT1D

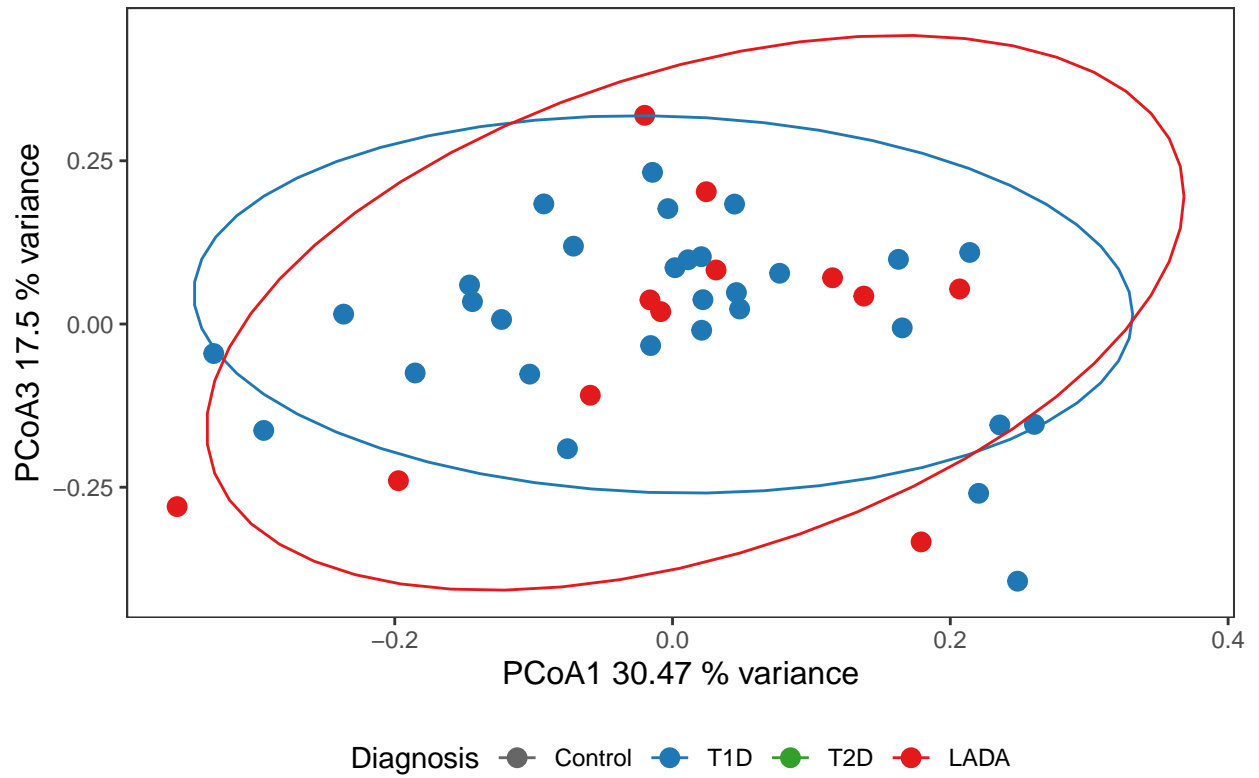

## [1] "LADAT2D"

PCoA LADAT1D

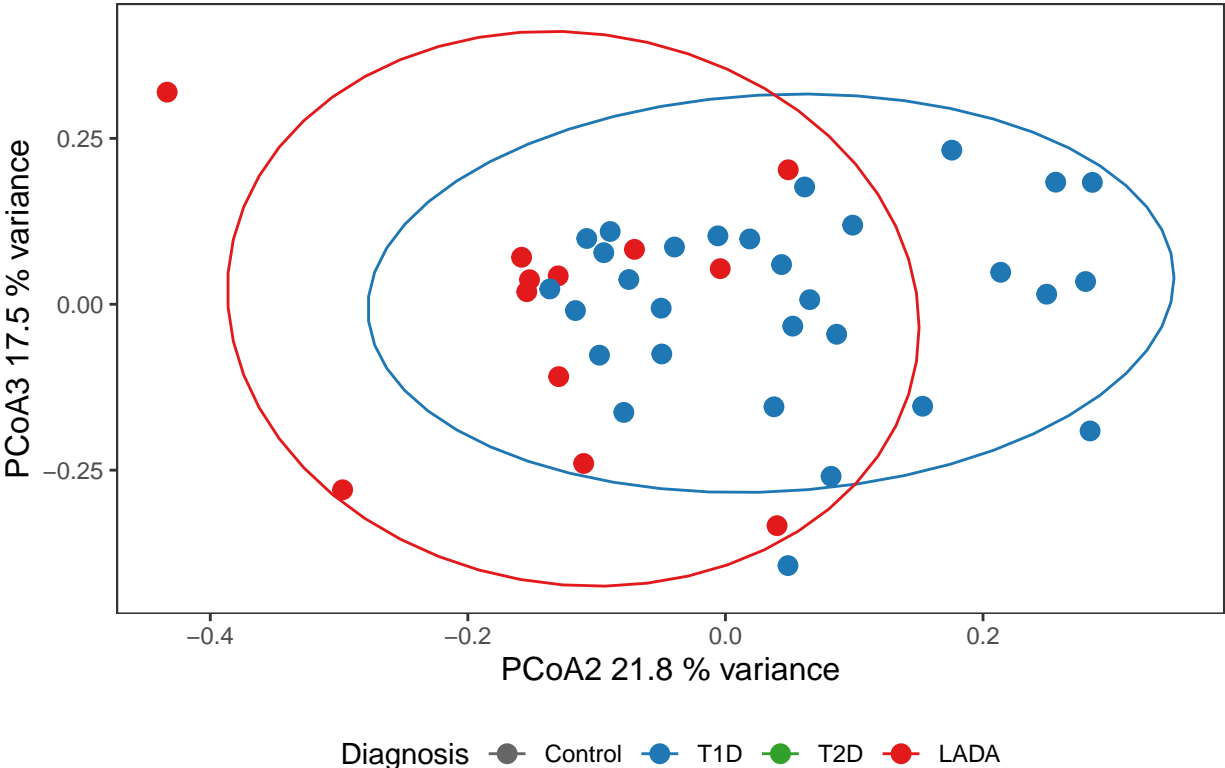

PCoA LADAT2D

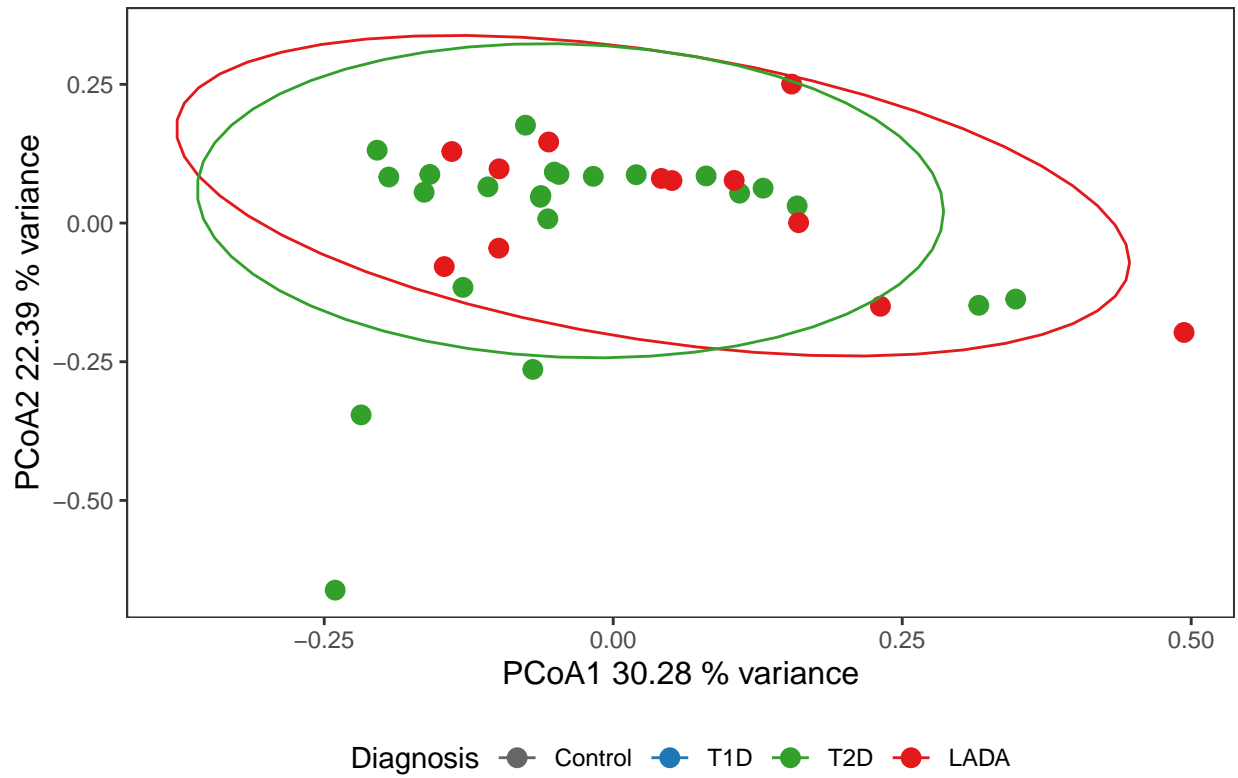

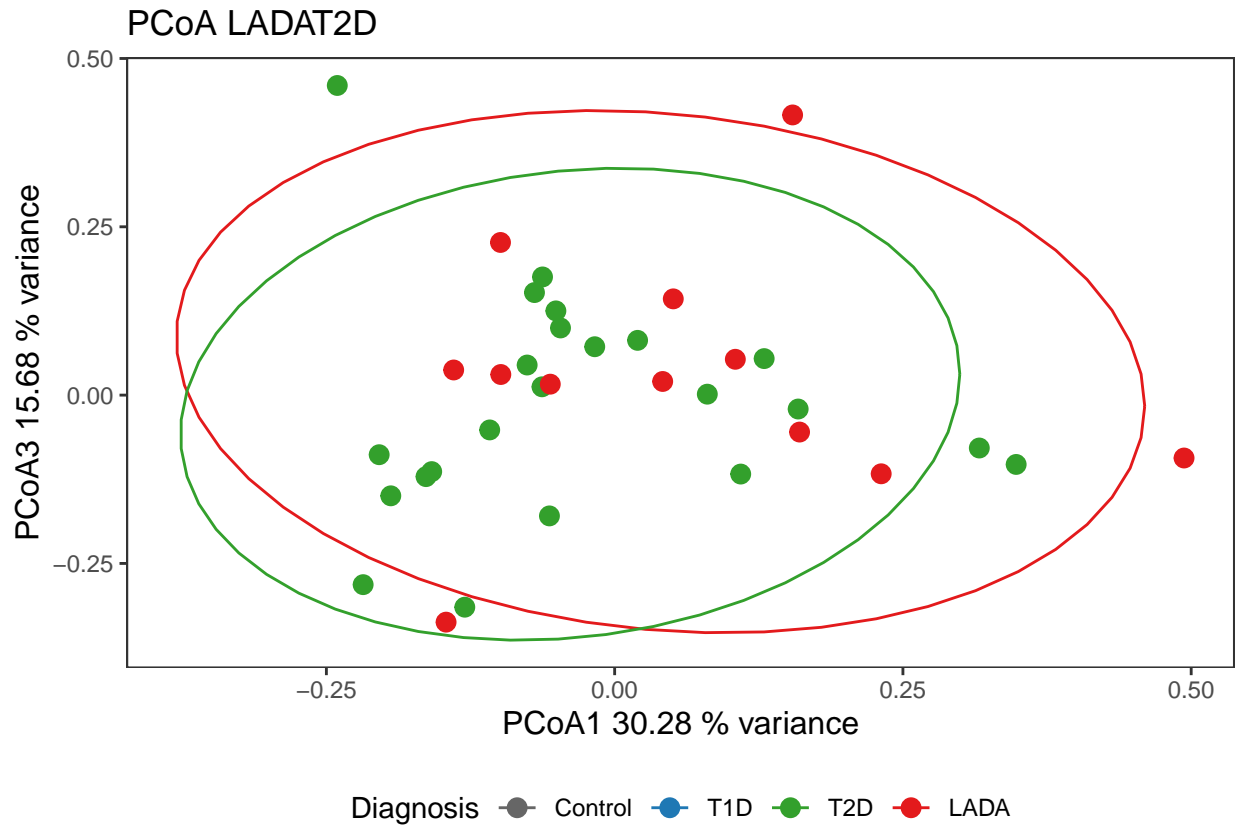

```
## [1] "All"
```

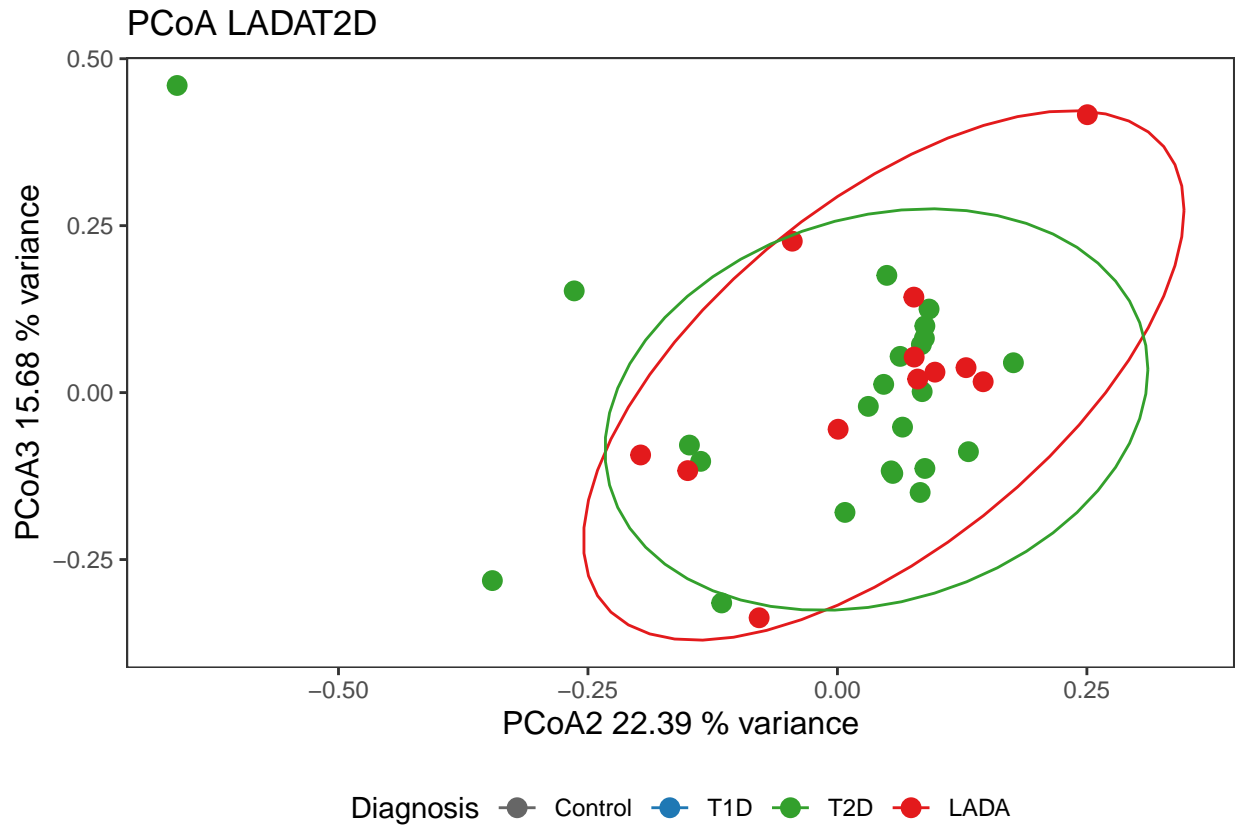

PCoA All

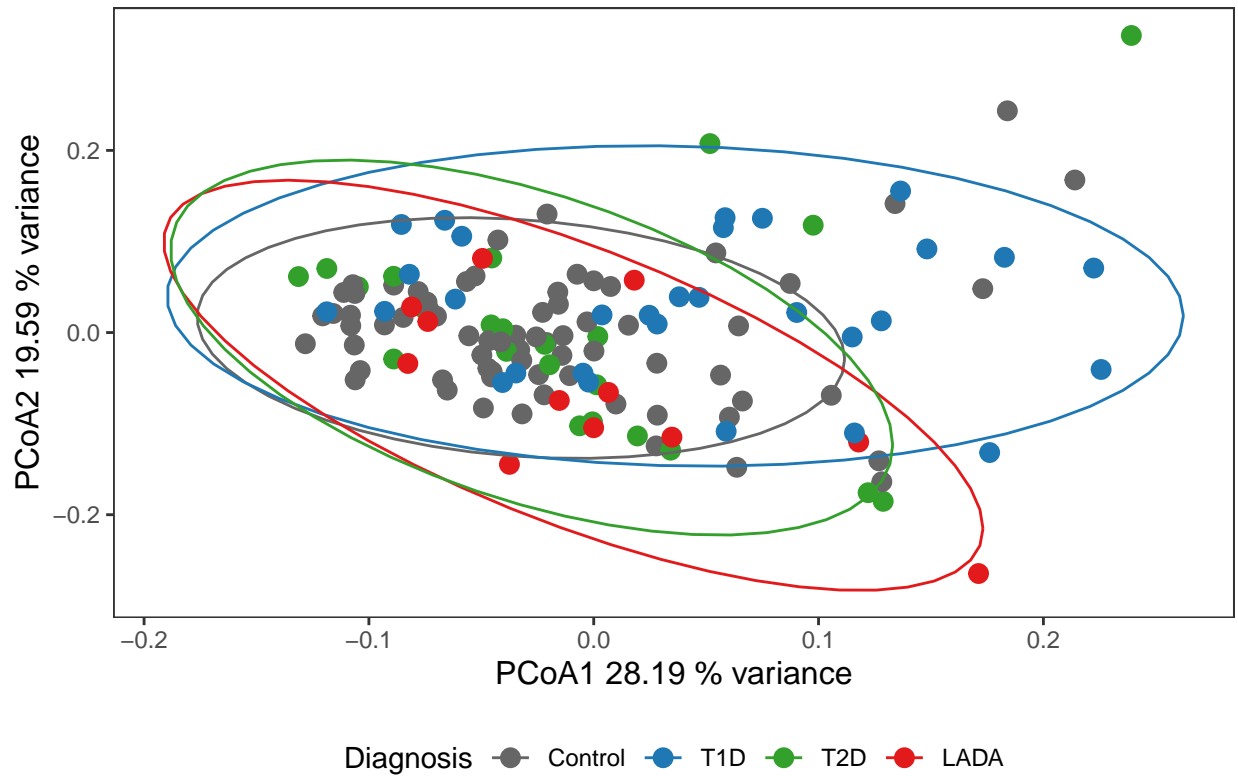





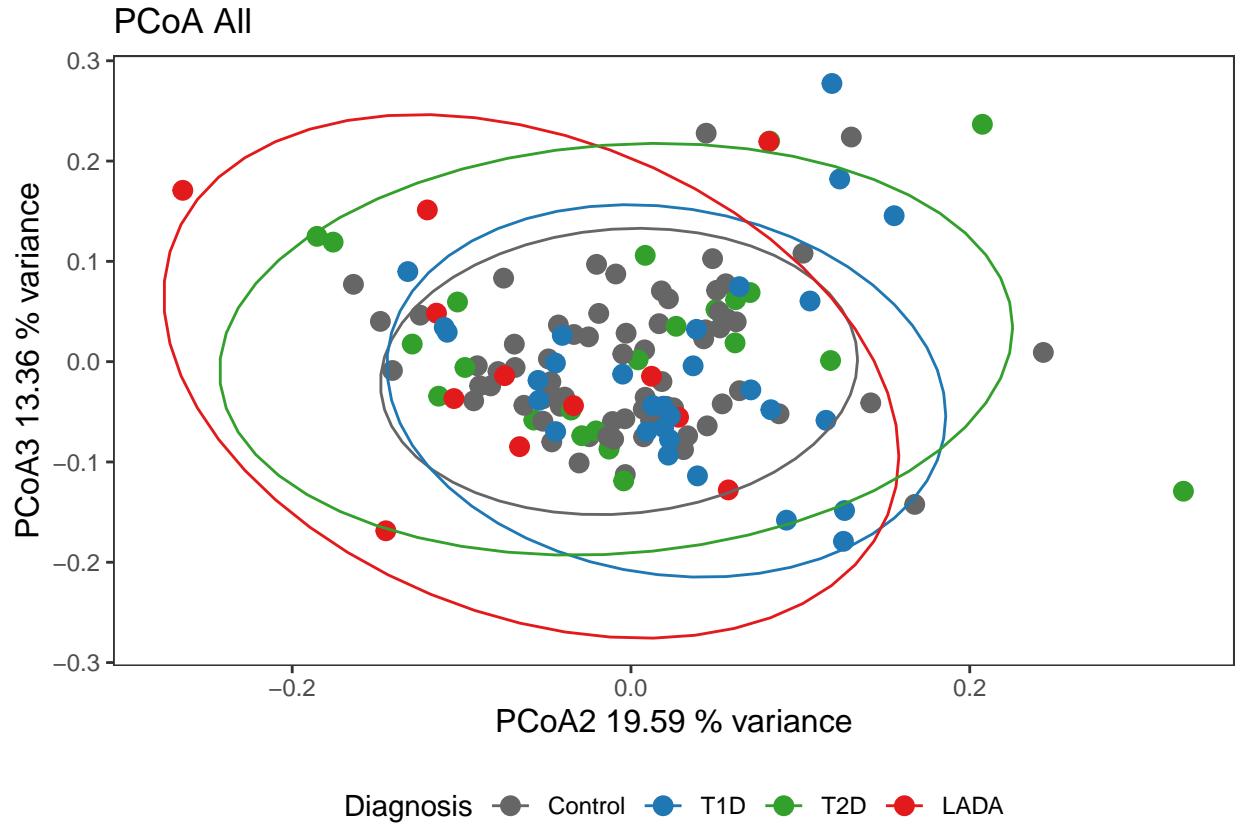

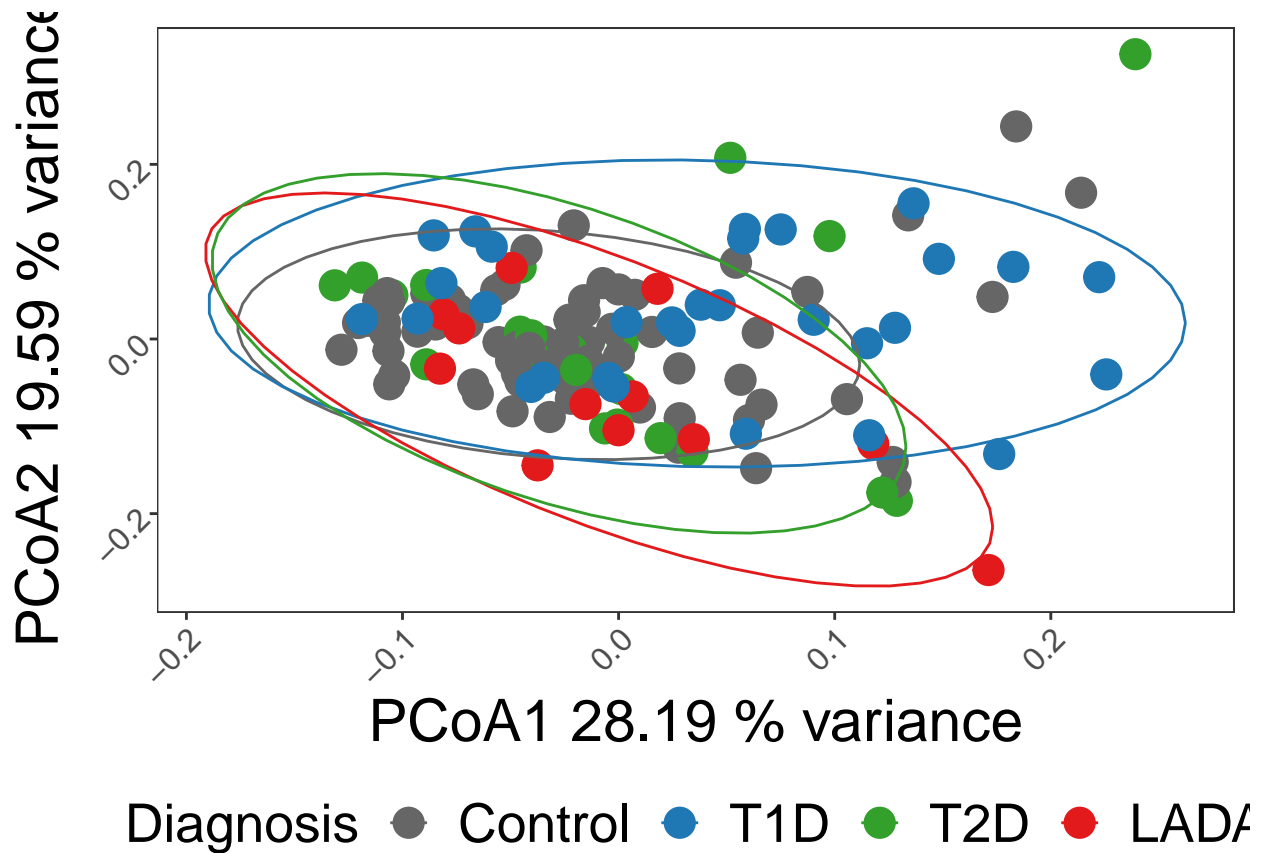

### Create figure 1

Investigating grouping diagnosis. Which group does LADA resemble the most and which are different from each other.

```
#Have the plots stored in list
lay <- rbind(c(1,2,3,4),
             c(1,2,3,4),
             c(5,5,5,5),
             c(5,5,5,5))

pdf(paste("MicroLADA_Figure1_Func.pdf", sep=""), width=15, height=15)
grid.arrange(Fig1List$Alpharichness,
             Fig1List$AlphaPielou,
             Fig1List$AlphaShannon,
             Fig1List$DissiBrayHel,
             Fig1List$PCoAall, layout_matrix = lay)

dev.off()
```

```
## pdf
## 2
```

```
pdf(paste("MicroLADA_Figure1RemMet_Func.pdf", sep=""), width=15, height=15)
grid.arrange(Fig1ListRemMet$AlphaRichness,
             Fig1ListRemMet$AlphaPielou,
             Fig1ListRemMet$AlphaShannon,
             Fig1ListRemMet$DissiBrayHel,
             Fig1ListRemMet$PCoAall, layout_matrix = lay)
dev.off()
```

```
## pdf
## 2
```

## PERMANOVA

Permutational Multivariate ANOVA based on dissimilarities (Bray-Curtis, Hellinger transformed data) using `vegan::adonis`  
 Added to figure 1 using inkscape.

```
rm(list=setdiff(ls(), c("Metadata", "MetadataMed", "Feature", "TaxonomyDA", "Taxonomy")))

#Hellinger transformation
Taxonomy2 <- data.frame(t(decostand(t(Taxonomy), method="hellinger")))
#Maks TSS
Taxonomy2<-sweep(Taxonomy2, 2, colSums(Taxonomy2), FUN="/")

#Dissimilarity
distmatrix <- vegdist(t(Taxonomy2), method="bray")

#adonis can handle both continous and factor predictors
set.seed(1)
adonisObject<-adonis2(distmatrix ~ Diagnosis, Metadata, by="terms",
                      perm=999) #, perm=999 can increase to get exact p-values
adonisObject #If significant then difference between groups

## Permutation test for adonis under reduced model
## Terms added sequentially (first to last)
## Permutation: free
## Number of permutations: 999
##
## adonis2(formula = distmatrix ~ Diagnosis, data = Metadata, permutations = 999, by = "terms")
##          Df SumOfSqs      R2      F Pr(>F)
## Diagnosis  3  0.01249 0.03699 2.8934  0.001 ***
## Residual 226  0.32528 0.96301
## Total    229  0.33777 1.00000
## ---
## Signif. codes:  0 '***' 0.001 '**' 0.01 '*' 0.05 '.' 0.1 ' ' 1

#With Metformin
set.seed(1)
adonisObject<-adonis2(distmatrix ~ Diagnosis + Metformin, Metadata, by="terms",
                      perm=999) #, perm=999 can increase to get exact p-values
adonisObject #If significant then difference between groups
```

```

## Permutation test for adonis under reduced model
## Terms added sequentially (first to last)
## Permutation: free
## Number of permutations: 999
##
## adonis2(formula = distmatrix ~ Diagnosis + Metformin, data = Metadata, permutations = 999, by = "terms")
##          Df SumOfSqs      R2      F Pr(>F)
## Diagnosis  3  0.01249 0.03699 2.8965  0.001 ***
## Metformin  1  0.00178 0.00528 1.2404  0.275
## Residual 225  0.32350 0.95773
## Total     229  0.33777 1.00000
## ---
## Signif. codes:  0 '***' 0.001 '**' 0.01 '*' 0.05 '.' 0.1 ' ' 1

```

```

set.seed(1)
adonisObject<-adonis2(distmatrix ~ Diagnosis * Metformin, Metadata, by="terms",
                      perm=999) #, perm=999 can increase to get exact p-values
adonisObject #If significant then difference between groups

```

```

## Permutation test for adonis under reduced model
## Terms added sequentially (first to last)
## Permutation: free
## Number of permutations: 999
##
## adonis2(formula = distmatrix ~ Diagnosis * Metformin, data = Metadata, permutations = 999, by = "terms")
##          Df SumOfSqs      R2      F Pr(>F)
## Diagnosis  3  0.01249 0.03699 2.9005  0.001 ***
## Metformin  1  0.00178 0.00528 1.2422  0.275
## Diagnosis:Metformin 1  0.00189 0.00560 1.3172  0.235
## Residual 224  0.32160 0.95213
## Total     229  0.33777 1.00000
## ---
## Signif. codes:  0 '***' 0.001 '**' 0.01 '*' 0.05 '.' 0.1 ' ' 1

```

```

#With Metformin first in the model formula
set.seed(1)
adonisObject<-adonis2(distmatrix ~ Metformin + Diagnosis, Metadata, by="terms",
                      perm=999) #, perm=999 can increase to get exact p-values
adonisObject #If significant then difference between groups

```

```

## Permutation test for adonis under reduced model
## Terms added sequentially (first to last)
## Permutation: free
## Number of permutations: 999
##
## adonis2(formula = distmatrix ~ Metformin + Diagnosis, data = Metadata, permutations = 999, by = "terms")
##          Df SumOfSqs      R2      F Pr(>F)
## Metformin  1  0.00551 0.01632 3.8343  0.004 **
## Diagnosis  3  0.00876 0.02595 2.0318  0.009 **
## Residual 225  0.32350 0.95773
## Total     229  0.33777 1.00000
## ---
## Signif. codes:  0 '***' 0.001 '**' 0.01 '*' 0.05 '.' 0.1 ' ' 1

```

```

#Actual test reported in figure 1
#With by = margin does not matter the order
set.seed(1)
adonisObject<-adonis2(distmatrix ~ Metformin + Diagnosis, Metadata, by="margin",
                      perm=999) #, perm=999 can increase to get exact p-values
adonisObject #If significant then difference between groups

```

```

## Permutation test for adonis under reduced model
## Marginal effects of terms
## Permutation: free
## Number of permutations: 999
##
## adonis2(formula = distmatrix ~ Metformin + Diagnosis, data = Metadata, permutations = 999, by = "margin")
##      Df SumOfSqs      R2      F Pr(>F)
## Metformin  1  0.00178 0.00528 1.2404  0.275
## Diagnosis  3  0.00876 0.02595 2.0318  0.009 **
## Residual 225  0.32350 0.95773
## Total     229  0.33777 1.00000
## ---
## Signif. codes:  0 '***' 0.001 '**' 0.01 '*' 0.05 '.' 0.1 ' ' 1

```

```

#Include BMI
set.seed(1)
adonisObject<-adonis2(distmatrix ~ Metformin + Diagnosis + BMI, Metadata, by="margin",
                      perm=999) #, perm=999 can increase to get exact p-values
adonisObject #If significant then difference between groups

```

```

## Permutation test for adonis under reduced model
## Marginal effects of terms
## Permutation: free
## Number of permutations: 999
##
## adonis2(formula = distmatrix ~ Metformin + Diagnosis + BMI, data = Metadata, permutations = 999, by = "margin")
##      Df SumOfSqs      R2      F Pr(>F)
## Metformin  1  0.00178 0.00526 1.2334  0.275
## Diagnosis  3  0.00868 0.02568 2.0092  0.011 *
## BMI        1  0.00110 0.00325 0.7627  0.584
## Residual 224  0.32240 0.95448
## Total     229  0.33777 1.00000
## ---
## Signif. codes:  0 '***' 0.001 '**' 0.01 '*' 0.05 '.' 0.1 ' ' 1

```

```

set.seed(1)
adonisObject<-adonis2(distmatrix ~ Metformin + Diagnosis + BMIord, Metadata, by="margin",
                      perm=999) #, perm=999 can increase to get exact p-values
adonisObject #If significant then difference between groups

```

```

## Permutation test for adonis under reduced model
## Marginal effects of terms
## Permutation: free
## Number of permutations: 999
##

```

```
## adonis2(formula = distmatrix ~ Metformin + Diagnosis + BMIord, data = Metadata, permutations = 999, 1)
##           Df SumOfSqs      R2      F Pr(>F)
## Metformin  1  0.00183 0.00541 1.2636  0.265
## Diagnosis  3  0.00850 0.02517 1.9598  0.016 *
## BMIord     5  0.00537 0.01589 0.7425  0.810
## Residual  220  0.31813 0.94184
## Total     229  0.33777 1.00000
## ---
## Signif. codes:  0 '***' 0.001 '**' 0.01 '*' 0.05 '.' 0.1 ' ' 1
```

```
set.seed(1)
adonisObject<-adonis2(distmatrix ~ Metformin + Diagnosis + BMIclass, Metadata, by="margin",
                      perm=999) #, perm=999 can increase to get exact p-values
adonisObject #If significant then difference between groups
```

```
## Permutation test for adonis under reduced model
## Marginal effects of terms
## Permutation: free
## Number of permutations: 999
##
## adonis2(formula = distmatrix ~ Metformin + Diagnosis + BMIclass, data = Metadata, permutations = 999)
##           Df SumOfSqs      R2      F Pr(>F)
## Metformin  1  0.00178 0.00526 1.2321  0.284
## Diagnosis  3  0.00880 0.02604 2.0321  0.010 **
## BMIclass   2  0.00175 0.00518 0.6069  0.863
## Residual  223  0.32174 0.95255
## Total     229  0.33777 1.00000
## ---
## Signif. codes:  0 '***' 0.001 '**' 0.01 '*' 0.05 '.' 0.1 ' ' 1
```

```
#set.seed(1)
#adonisObject<-adonis2(distmatrix ~ Metformin + Diagnosis + BMIordclass, Metadata, by="margin",
#                      perm=999) #, perm=999 can increase to get exact p-values
#adonisObject #If significant then difference between groups same ass BMIclass
```

```
set.seed(1)
adonisObject<-adonis2(distmatrix ~ Metformin + Diagnosis + BMIq, Metadata, by="margin",
                      perm=999) #, perm=999 can increase to get exact p-values
adonisObject #If significant then difference between groups
```

```
## Permutation test for adonis under reduced model
## Marginal effects of terms
## Permutation: free
## Number of permutations: 999
##
## adonis2(formula = distmatrix ~ Metformin + Diagnosis + BMIq, data = Metadata, permutations = 999, by)
##           Df SumOfSqs      R2      F Pr(>F)
## Metformin  1  0.00177 0.00525 1.2317  0.279
## Diagnosis  3  0.00868 0.02571 2.0090  0.011 *
## BMIq       1  0.00075 0.00223 0.5218  0.802
## Residual  224  0.32274 0.95551
## Total     229  0.33777 1.00000
## ---
## Signif. codes:  0 '***' 0.001 '**' 0.01 '*' 0.05 '.' 0.1 ' ' 1
```

```

set.seed(1)
adonisObject<-adonis2(distmatrix ~ Metformin * Diagnosis * BMIq, Metadata, by="margin",
                      perm=999) #, perm=999 can increase to get exact p-values
adonisObject #If significant then difference between groups

```

```

## Permutation test for adonis under reduced model
## Marginal effects of terms
## Permutation: free
## Number of permutations: 999
##
## adonis2(formula = distmatrix ~ Metformin * Diagnosis * BMIq, data = Metadata, permutations = 999, by
##
##           Df SumOfSqs      R2      F Pr(>F)
## Metformin:Diagnosis:BMIq  1  0.00122 0.00360 0.846  0.539
## Residual                  218  0.31357 0.92834
## Total                      229  0.33777 1.00000

```

```

set.seed(1)
adonisObject<-adonis2(distmatrix ~ Diagnosis + BMIq, Metadata, by="margin",
                      perm=999) #, perm=999 can increase to get exact p-values
adonisObject #If significant then difference between groups

```

```

## Permutation test for adonis under reduced model
## Marginal effects of terms
## Permutation: free
## Number of permutations: 999
##
## adonis2(formula = distmatrix ~ Diagnosis + BMIq, data = Metadata, permutations = 999, by = "margin")
##           Df SumOfSqs      R2      F Pr(>F)
## Diagnosis   3  0.01185 0.03510 2.7398  0.001 ***
## BMIq         1  0.00076 0.00225 0.5274  0.799
## Residual    225  0.32452 0.96076
## Total       229  0.33777 1.00000
## ---
## Signif. codes:  0 '***' 0.001 '**' 0.01 '*' 0.05 '.' 0.1 ' ' 1

```

```

## Evaluating the model assumptions
TestModel <- with(Metadata, betadisper(distmatrix, Diagnosis)) #Can not run
#betadisper with multiple independant variables
#TestModel
#plot(TestModel)
plot(TestModel, label=FALSE)

```



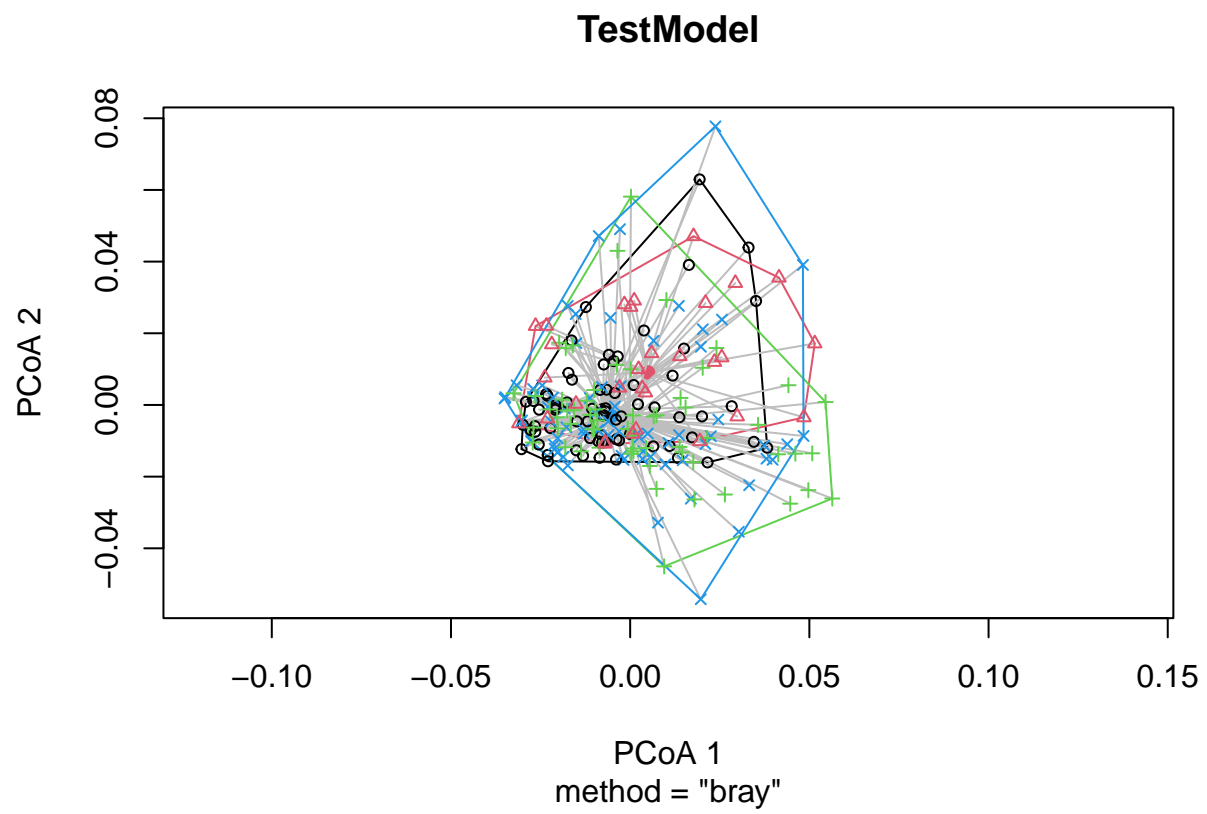

```
boxplot(TestModel)
```

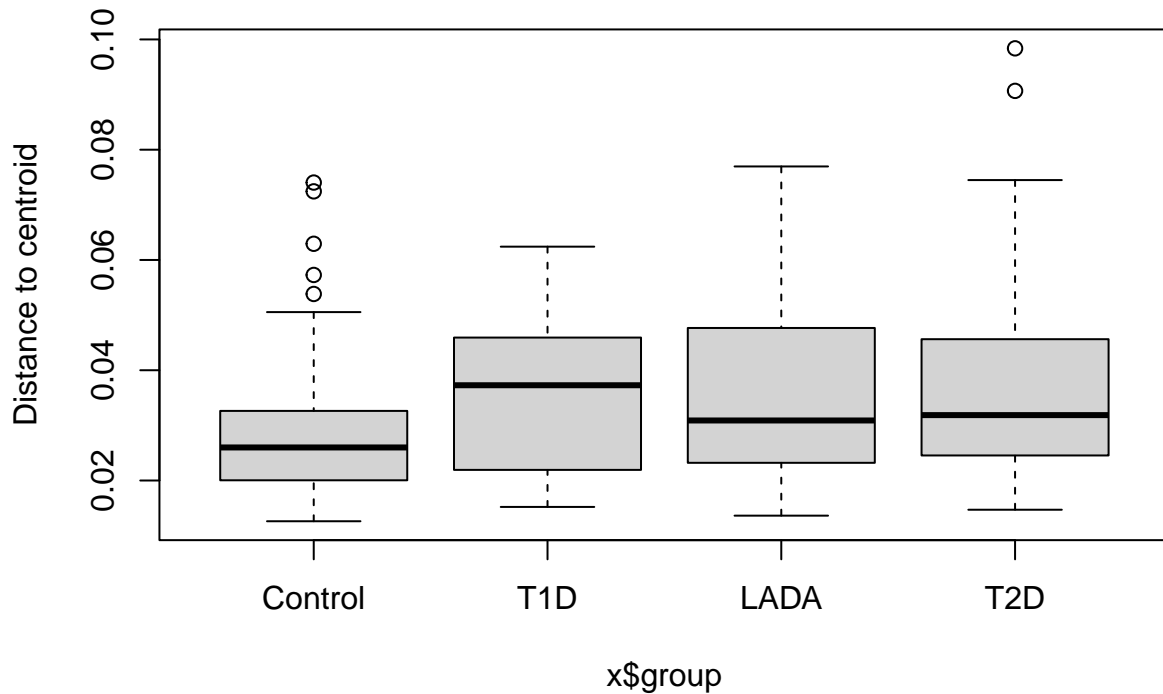

```
anova(TestModel) #p>0.05 -> Assumption met
```

```
## Analysis of Variance Table
##
## Response: Distances
##           Df  Sum Sq  Mean Sq F value  Pr(>F)
## Groups      3 0.002895 0.0009650  4.0445 0.007934 **
## Residuals 226 0.053923 0.0002386
## ---
## Signif. codes:  0 '***' 0.001 '**' 0.01 '*' 0.05 '.' 0.1 ' ' 1
```

```
#permutest(TestModel)
```

```
table(Metadata$Metformin, Metadata$Diagnosis)
```

```
##
##   Control T1D LADA T2D
## 0      70  30  12  23
## 1       0   0  48  47
```

PERMANOVA remove metformin

```

rm(list=setdiff(ls(), c("Metadata", "MetadataMed", "Feature", "TaxonomyDA", "Taxonomy")))

##Removing treated with metformin
#Metadata$Metformin <- ifelse(is.na(Metadata$Metformin), "Unknow", Metadata$Metformin)
Metadata2<-filter(Metadata, !Metformin == 1)
##Applying subsetting to OTU tables
Taxonomy2<-dplyr::select(Taxonomy, one_of(as.character(Metadata2$MicrobiomeID)))
##Remove orgs that are not present after subsetting.
Taxonomy2 <- Taxonomy2[rowSums(Taxonomy2)>0,]

##Hellinger transformation
Taxonomy2 <- data.frame(t(decostand(t(Taxonomy2), method="hellinger")))
#Maks TSS
Taxonomy2<-sweep(Taxonomy2, 2, colSums(Taxonomy2), FUN="/")

#Dissimilarity
distmatrix <- vegdist(t(Taxonomy2), method="bray")

set.seed(1)
adonisObject<-adonis2(distmatrix ~ Diagnosis, Metadata2, by="margin",
                      perm=999) #, perm=999 can increase to get exact p-values
adonisObject #If significant then difference between groups

```

```

## Permutation test for adonis under NA model
## Marginal effects of terms
## Permutation: free
## Number of permutations: 999
##
## adonis2(formula = distmatrix ~ Diagnosis, data = Metadata2, permutations = 999, by = "margin")
##           Df SumOfSqs      R2      F Pr(>F)
## Diagnosis   3  0.009086 0.05015  2.3054  0.003 **
## Residual  131  0.172095 0.94985
## Total      134  0.181181 1.00000
## ---
## Signif. codes:  0 '***' 0.001 '**' 0.01 '*' 0.05 '.' 0.1 ' ' 1

```

```

set.seed(1)
adonisObject<-adonis2(distmatrix ~ Diagnosis + BMIq, Metadata2, by="margin",
                      perm=999) #, perm=999 can increase to get exact p-values
adonisObject #If significant then difference between groups

```

```

## Permutation test for adonis under reduced model
## Marginal effects of terms
## Permutation: free
## Number of permutations: 999
##
## adonis2(formula = distmatrix ~ Diagnosis + BMIq, data = Metadata2, permutations = 999, by = "margin")
##           Df SumOfSqs      R2      F Pr(>F)
## Diagnosis   3  0.009181 0.05067  2.3198  0.002 **
## BMIq         1  0.000597 0.00330  0.4528  0.843
## Residual  130  0.171498 0.94656

```

```
## Total      134 0.181181 1.00000
## ---
## Signif. codes:  0 '***' 0.001 '**' 0.01 '*' 0.05 '.' 0.1 ' ' 1
```

```
## Evaluating the model assumptions
```

```
TestModel <- with(Metadata2, betadisper(distmatrix, Diagnosis)) #Can not run
```

```
#betadisper with multiple independant variables
```

```
#TestModel
```

```
#plot(TestModel)
```

```
plot(TestModel, label=FALSE)
```

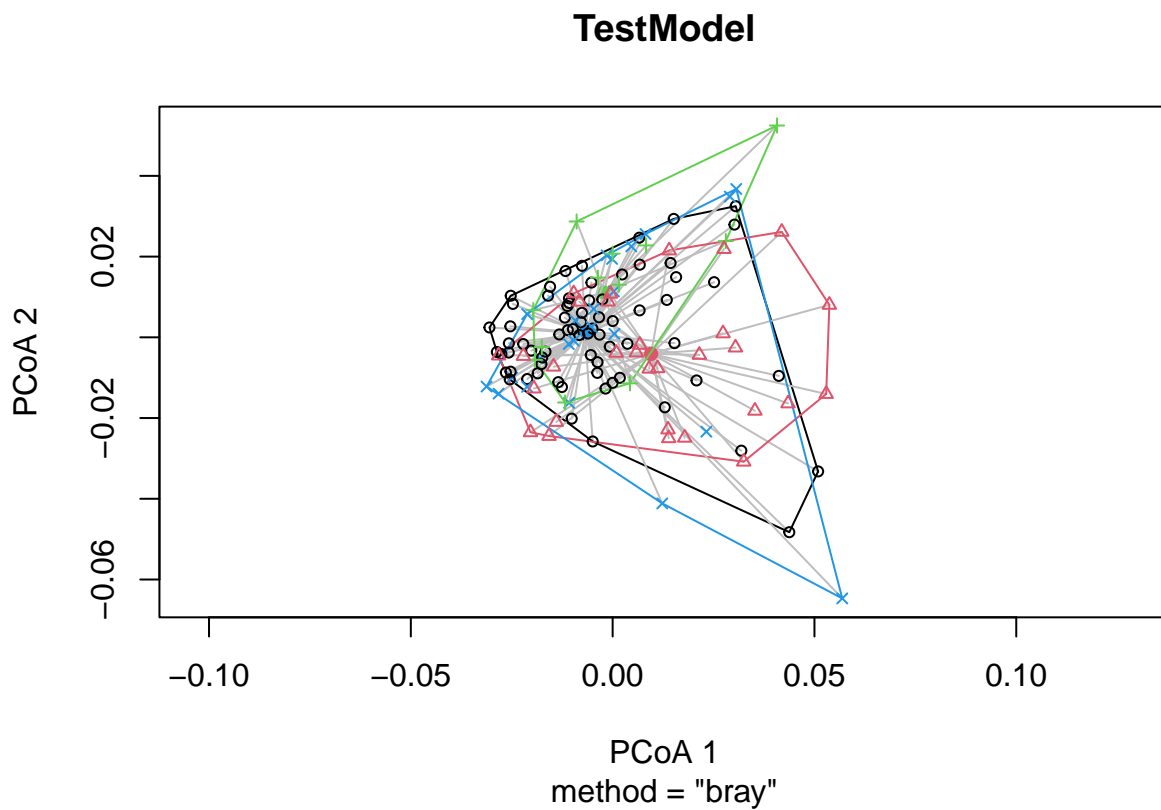

```
boxplot(TestModel)
```

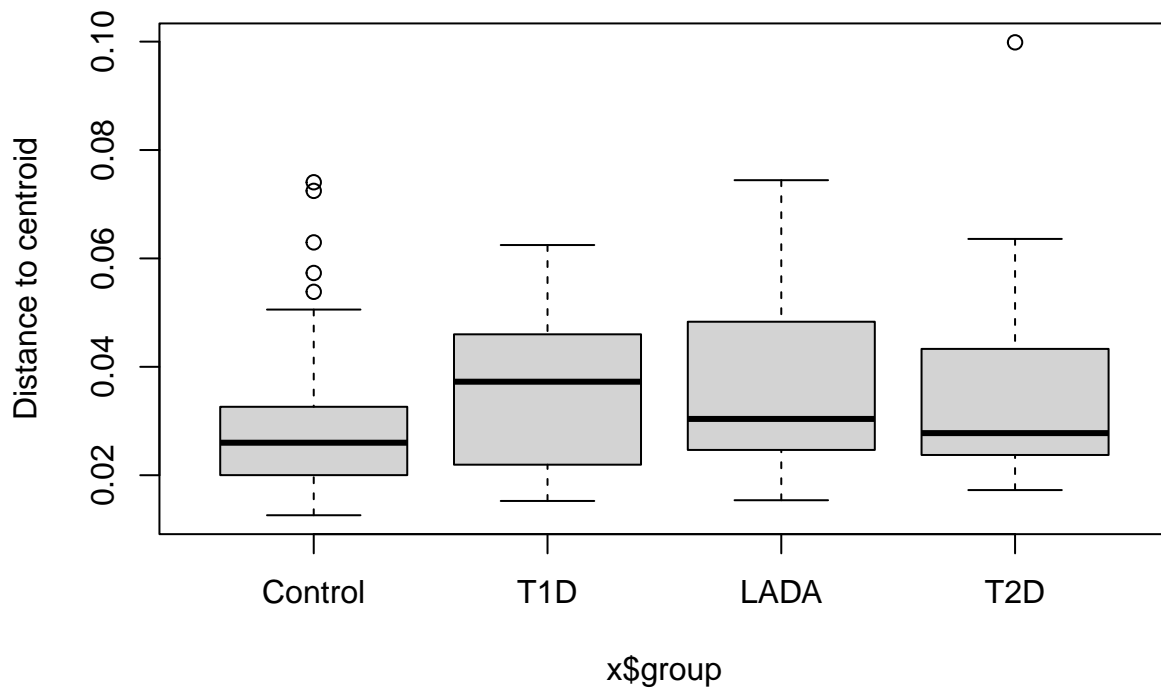

```
anova(TestModel) #p>0.05 -> Assumption met
```

```
## Analysis of Variance Table
##
## Response: Distances
##          Df Sum Sq Mean Sq F value Pr(>F)
## Groups    3 0.001726 0.00057532  2.5539 0.05822 .
## Residuals 131 0.029510 0.00022527
## ---
## Signif. codes:  0 '***' 0.001 '**' 0.01 '*' 0.05 '.' 0.1 ' ' 1
```

```
#permutest(TestModel)
```

```
table(Metadata2$Metformin, Metadata2$Diagnosis)
```

```
##
##      Control T1D LADA T2D
## 0         70  30  12  23
```

PERMANOVA MED subset

```

rm(list=setdiff(ls(), c("Metadata", "MetadataMed", "Feature", "TaxonomyDA", "Taxonomy")))

##Metadatamed
##Applying subsetting to OTU tables
Taxonomy2<-dplyr::select(Taxonomy, one_of(as.character(MetadataMed$MicrobiomeID)))

#Hellinger transformation
Taxonomy2 <- data.frame(t(decostand(t(Taxonomy2), method="hellinger")))
#Maks TSS
Taxonomy2<-sweep(Taxonomy2, 2, colSums(Taxonomy2), FUN="/")

#Dissimilarity
dismatrix <- vegdist(t(Taxonomy2), method="bray")

#With by = margin does not matter the order
set.seed(1)
adonisObject<-adonis2(dismatrix ~ Diagnosis + BMIq, MetadataMed, by="margin",
                      perm=999) #, perm=999 can increase to get exact p-values
adonisObject #If significant then difference between groups

```

```

## Permutation test for adonis under reduced model
## Marginal effects of terms
## Permutation: free
## Number of permutations: 999
##
## adonis2(formula = dismatrix ~ Diagnosis + BMIq, data = MetadataMed, permutations = 999, by = "margin")
##          Df SumOfSqs      R2      F Pr(>F)
## Diagnosis  2 0.008625 0.03274 2.6514 0.006 **
## BMIq       1 0.001292 0.00490 0.7942 0.583
## Residual 156 0.253748 0.96311
## Total     159 0.263468 1.00000
## ---
## Signif. codes:  0 '***' 0.001 '**' 0.01 '*' 0.05 '.' 0.1 ' ' 1

```

```

set.seed(1)
adonisObject<-adonis2(dismatrix ~ Metformin + Diagnosis, MetadataMed, by="margin",
                      perm=999) #, perm=999 can increase to get exact p-values
adonisObject #If significant then difference between groups

```

```

## Permutation test for adonis under reduced model
## Marginal effects of terms
## Permutation: free
## Number of permutations: 999
##
## adonis2(formula = dismatrix ~ Metformin + Diagnosis, data = MetadataMed, permutations = 999, by = "margin")
##          Df SumOfSqs      R2      F Pr(>F)
## Metformin  1 0.001783 0.00677 1.0986 0.34
## Diagnosis  2 0.006084 0.02309 1.8737 0.04 *
## Residual 156 0.253256 0.96124
## Total     159 0.263468 1.00000
## ---
## Signif. codes:  0 '***' 0.001 '**' 0.01 '*' 0.05 '.' 0.1 ' ' 1

```

```

set.seed(1)
adonisObject<-adonis2(distmatrix ~ Diagnosis + Metformin + BMIq , MetadataMed, by="margin",
                      perm=999) #, perm=999 can increase to get exact p-values
adonisObject #If significant then difference between groups

```

```

## Permutation test for adonis under reduced model
## Marginal effects of terms
## Permutation: free
## Number of permutations: 999
##
## adonis2(formula = distmatrix ~ Diagnosis + Metformin + BMIq, data = MetadataMed, permutations = 999,
##          Df SumOfSqs      R2      F Pr(>F)
## Diagnosis  2 0.006481 0.02460 1.9937 0.029 *
## Metformin  1 0.001814 0.00688 1.1158 0.329
## BMIq       1 0.001322 0.00502 0.8133 0.566
## Residual 155 0.251934 0.95622
## Total     159 0.263468 1.00000
## ---
## Signif. codes:  0 '***' 0.001 '**' 0.01 '*' 0.05 '.' 0.1 ' ' 1

```

```

set.seed(1)
adonisObject<-adonis2(distmatrix ~ Diagnosis + Metformin + BMIq + med_insulin + med_statins + med_protonpump_inhibitor,
                      MetadataMed, by="margin", perm=999) #, perm=999 can increase to get exact p-values
adonisObject #If significant then difference between groups

```

```

## Permutation test for adonis under reduced model
## Marginal effects of terms
## Permutation: free
## Number of permutations: 999
##
## adonis2(formula = distmatrix ~ Diagnosis + Metformin + BMIq + med_insulin + med_statins + med_protonpump_inhibitor,
##          Df SumOfSqs      R2      F Pr(>F)
## Diagnosis  2 0.006495 0.02465 1.9936 0.027 *
## Metformin  1 0.001670 0.00634 1.0249 0.386
## BMIq       1 0.001194 0.00453 0.7329 0.620
## med_insulin 1 0.001048 0.00398 0.6433 0.687
## med_statins 1 0.001730 0.00656 1.0617 0.359
## med_protonpump_inhibitor 1 0.001476 0.00560 0.9058 0.466
## Residual 152 0.247620 0.93985
## Total     159 0.263468 1.00000
## ---
## Signif. codes:  0 '***' 0.001 '**' 0.01 '*' 0.05 '.' 0.1 ' ' 1

```

```

## Evaluating the model assumptions
TestModel <- with(MetadataMed, betadisper(distmatrix, Diagnosis)) #Can not run
#betadisper with multiple independant variables
#TestModel
#plot(TestModel)
plot(TestModel, label=FALSE)

```

### TestModel

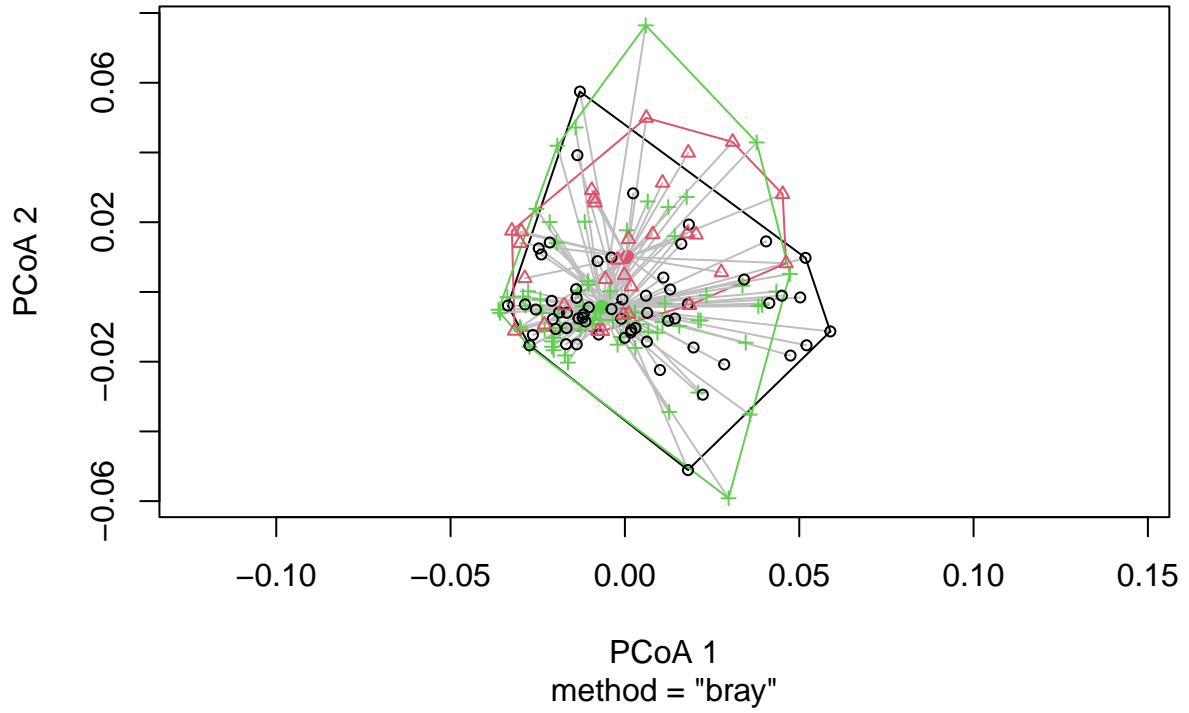

```
boxplot(TestModel)
```



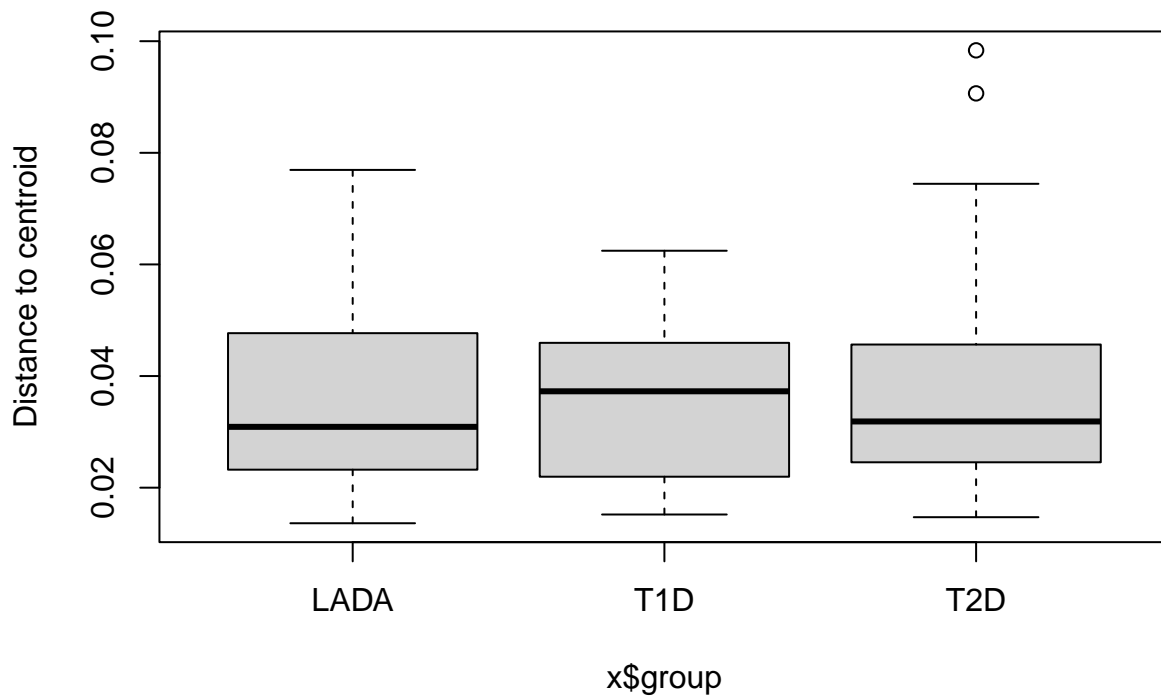

```
anova(TestModel) #p>0.05 -> Assumption met
```

```
## Analysis of Variance Table
##
## Response: Distances
##          Df Sum Sq Mean Sq F value Pr(>F)
## Groups    2 0.000058 2.8772e-05  0.1066  0.899
## Residuals 157 0.042392 2.7001e-04
```

```
#permutest(TestModel)
```

### Pairwise PERMANOVA

Pairwise adonis, found this function from Pedro Martinez Arbizu on researchgate ([https://www.researchgate.net/post/How\\_can\\_I\\_do\\_PerMANOVA\\_pairwise\\_contrasts\\_in\\_R](https://www.researchgate.net/post/How_can_I_do_PerMANOVA_pairwise_contrasts_in_R)) He also made implementation of adonis2 <https://github.com/pmartinezarbizu/pairwiseAdonis>

```
rm(list=setdiff(ls(), c("Metadata", "MetadataMed", "Feature", "TaxonomyDA", "Taxonomy")))
##Initial normalization/transformation the function runs method from adonis passed from
##vegdist
#Hellinger transformation
Taxonomy2 <- data.frame(t(decostand(t(Taxonomy), method="hellinger")))
#Maks TSS
```

```

Taxonomy2<-sweep(Taxonomy2, 2, colSums(Taxonomy2), FUN="/")

##Testing function
#x <- t(Taxonomy2)
#factors <- as.character(Metadata$Diagnosis)
#sim.method <- 'bray'
#p.adjust.m <- 'bonferroni'
#elem<-1

pairwise.adonis <- function(x, factors, sim.method = 'bray', p.adjust.m = 'bonferroni')
#x = the community table
#factors = a column or vector with all factors to be tested pairwise
#sim.method = similarity function, one of the functions available in vegdist(); default is
#'bray' for bray-curtis.
#p.adjust.m = the p.value correction method, one of the methods supported by p.adjust();
#default is 'bonferroni'
{
#library(vegan)
co = combn(unique(factors),2)
pairs = c()
F.Model =c()
R2 = c()
p.value = c()
for(elem in 1:ncol(co)){
ad = adonis(x[factors %in% c(co[1,elem],co[2,elem]),] ~
           factors[factors %in% c(co[1,elem],co[2,elem])] ,
           method =sim.method); #Extracting a matrix only containing samples of a pair
pairs = c(pairs,paste(co[1,elem], 'vs', co[2,elem]));
F.Model =c(F.Model,ad$aov.tab[1,4]);
R2 = c(R2,ad$aov.tab[1,5]);
p.value = c(p.value,ad$aov.tab[1,6])
}
p.adjusted = p.adjust(p.value,method=p.adjust.m) #adjusting after all comparisons
pairw.res = data.frame(pairs,F.Model,R2,p.value,p.adjusted)
return(pairw.res)
}

pairwise.adonis(t(Taxonomy2), as.character(Metadata$Diagnosis))

```

```

##           pairs    F.Model      R2 p.value p.adjusted
## 1  T2D vs Control 1.7605106 0.012596624 0.090      0.540
## 2    T2D vs LADA 0.9577613 0.007426938 0.408      1.000
## 3    T2D vs T1D 3.3350811 0.032911417 0.007      0.042
## 4 Control vs LADA 3.8449904 0.029162962 0.004      0.024
## 5 Control vs T1D 4.7357403 0.046096327 0.002      0.012
## 6    LADA vs T1D 4.2447073 0.046015727 0.001      0.006

```

```

pairw.res<-pairwise.adonis(t(Taxonomy2), as.character(Metadata$Diagnosis))

```

```

##Implementation of adonis2 can not get to work
##My implementation of adonis2 for my data when running with diagnosis

```

```

##Testing function
x <- t(Taxonomy2)
factors <- as.character(Metadata$Diagnosis)
factors2 <- as.character(Metadata$Metformin)
sim.method <- 'bray'
p.adjust.m <- 'bonferroni'
#elem<-1
#elem<-5

#pairwise.adonis.multiplevar <- function(x, factors, factors2, sim.method = 'bray',
#p.adjust.m='bonferroni')
#x = the community table
#factors = a column or vector with all factors to be tested pairwise
#sim.method = similarity function, one of the functions available in vegdist(); default is
#'bray' for bray-curtis
#p.adjust.m = the p.value correction method, one of the methods supported by p.adjust();
#default is 'bonferroni'
#{
#library(vegan)
co = combn(unique(factors),2)
pairs = c()
F.Model =c()
R2 = c()
p.value = c()
F.Model.2 =c()
R2.2 = c()
p.value.2 = c()
#for(elem in 1:ncol(co)){
for(elem in c(1:4,6)){
ad = adonis2(x[factors %in% c(co[1,elem],co[2,elem]),] ~
            factors[factors %in% c(co[1,elem],co[2,elem])] +
            factors2[factors %in% c(co[1,elem],co[2,elem])],
            method =sim.method, by="margin"); #Extracting a matrix only containing
            #samples of a pair
pairs = c(pairs,paste(co[1,elem], 'vs', co[2,elem]));
F.Model =c(F.Model,ad$F[1]);
R2 = c(R2,ad$R2[1]);
p.value = c(p.value,ad$`Pr(>F)`[1])
F.Model.2 =c(F.Model.2,ad$F[2])
R2.2 = c(R2.2,ad$R2[2])
p.value.2 = c(p.value.2,ad$`Pr(>F)`[2])
}
p.adjusted = p.adjust(p.value,method=p.adjust.m)
p.adjusted.2 = p.adjust(p.value.2,method=p.adjust.m)
pairw.res.2 = data.frame(pairs, F.Model, R2, p.value, p.adjusted,
                        F.Model.2, R2.2, p.value.2, p.adjusted.2)
#return(pairw.res)
#}

#pairwise.adonis.multiplevar(t(Taxonomy2), factors = as.character(Metadata$Diagnosis),
#
#                           factors2 = as.character(Metadata$Metformin),
#                           sim.method = 'bray', p.adjust.m ='bonferroni')

```

```
pairw.res.2
```

```
##           pairs  F.Model          R2 p.value p.adjusted F.Model.2
## 1  T2D vs Control 0.5187954 0.003687712  0.820      1.000 1.9100461
## 2    T2D vs LADA 0.9121886 0.007069354  0.437      1.000 1.0759017
## 3    T2D vs T1D 1.7753031 0.017414704  0.101      0.505 1.5876860
## 4 Control vs LADA 1.8837435 0.014304937  0.078      0.390 0.8445350
## 5    LADA vs T1D 3.0276423 0.032935825  0.014      0.070 0.6954837
##           R2.2 p.value.2 p.adjusted.2
## 1 0.013577031    0.085      0.425
## 2 0.008338111    0.366      1.000
## 3 0.015574288    0.141      0.705
## 4 0.006413304    0.525      1.000
## 5 0.007565732    0.662      1.000
```

```
write.table(pairw.res, file="adonis_pairwisediagnosis_Func.txt",
            quote = F, row.names = F, sep="\t")
write.table(pairw.res.2, file="adonis2_pairwisediagnosiswvarmet_Func.txt",
            quote = F, row.names = F, sep="\t")
```

## Pairwise PERMANOVA remove metformin

```
rm(list=setdiff(ls(), c("Metadata", "MetadataMed", "Feature", "TaxonomyDA", "Taxonomy")))

##Removing treated with metformin
#Metadata$Metformin <- ifelse(is.na(Metadata$Metformin), "Unknow", Metadata$Metformin)
Metadata2<-filter(Metadata, !Metformin == 1)
##Applying subsetting to OTU tables
Taxonomy2<-dplyr::select(Taxonomy, one_of(as.character(Metadata2$MicrobiomeID)))
##Remove orgs that are not present after subsetting.
Taxonomy2 <- Taxonomy2[rowSums(Taxonomy2)>0,]

##Initial normalization/transformation the function runs method from adonis passed from
##vegdist
#Hellinger transformation
Taxonomy2 <- data.frame(t(decostand(t(Taxonomy2), method="hellinger")))
#Maks TSS
Taxonomy2<-sweep(Taxonomy2, 2, colSums(Taxonomy2), FUN="/")

##Testing function
#x <- t(Taxonomy2)
#factors <- as.character(Metadata$Diagnosis)
#sim.method <- 'bray'
#p.adjust.m <- 'bonferroni'
#elem<-1

pairwise.adonis <- function(x, factors, sim.method = 'bray', p.adjust.m = 'bonferroni')
#x = the community table
#factors = a column or vector with all factors to be tested pairwise
#sim.method = similarity function, one of the functions available in vegdist(); default is
#'bray' for bray-curtis.
```

```

#p.adjust.m = the p.value correction method, one of the methods supported by p.adjust();
#default is 'bonferroni'
{
  #library(vegan)
  co = combn(unique(factors),2)
  pairs = c()
  F.Model =c()
  R2 = c()
  p.value = c()
  for(elem in 1:ncol(co)){
    ad = adonis(x[factors %in% c(co[1,elem],co[2,elem]),] ~
               factors[factors %in% c(co[1,elem],co[2,elem])] ,
               method =sim.method); #Extracting a matrix only containing samples of a pair
    pairs = c(pairs,paste(co[1,elem], 'vs', co[2,elem]));
    F.Model =c(F.Model,ad$aov.tab[1,4]);
    R2 = c(R2,ad$aov.tab[1,5]);
    p.value = c(p.value,ad$aov.tab[1,6])
  }
  p.adjusted = p.adjust(p.value,method=p.adjust.m) #adjusting after all comparisons
  pairw.res = data.frame(pairs,F.Model,R2,p.value,p.adjusted)
  return(pairw.res)
}

pairwise.adonis(t(Taxonomy2), as.character(Metadata2$Diagnosis))

```

```

##           pairs   F.Model         R2 p.value p.adjusted
## 1 Control vs T2D 0.5888035 0.006428772  0.736     1.000
## 2 Control vs LADA 2.1326667 0.025966120  0.048     0.288
## 3 Control vs T1D 4.7357403 0.046096327  0.002     0.012
## 4   T2D vs LADA 1.0237678 0.030089784  0.399     1.000
## 5   T2D vs T1D 1.8191877 0.034441797  0.089     0.534
## 6   LADA vs T1D 2.9824999 0.069388702  0.013     0.078

```

```

pairw.res<-pairwise.adonis(t(Taxonomy2), as.character(Metadata2$Diagnosis))

```

```

##Implementation of adonis2 can not get to work
##Made my implementation of adonis2 for my data when running with diagnosis and
  #in this case the other factor metformin so removed when removing samples with
  #patients treated with metformin

```

```

write.table(pairw.res, file="adonis_pairwisediagnosisremovedmetsamples.txt",
            quote = F, row.names = F, sep="\t")

```

## Heatmap

```

rm(list=setdiff(ls(), c("Metadata", "MetadataMed", "Feature", "TaxonomyDA", "Taxonomy")))

```

```

#Add a categorical indicator of sex in Metadata also used in rest of script

```

```

Metadata$Sex<-as.factor(ifelse(grepl("1", Metadata$sex), "Male",
                               ifelse(grepl("2", Metadata$sex), "Female",
                                         "hmmmmm")))

#The organisms clustering
OrgCluster<-"correlation"

#How many organisms to include in heatmap
Orgs<-25 #Write a number 20-50 seems appropriate for readability

HeatmapExplainers<-c("Sex", "Metformin", "Diagnosis")

#Make list of annotation colors
annotation_colorsNew = list(Diagnosis = c(Control = "#666666", T1D = "#1F78B4",
                                           LADA = "#E31A1C", T2D = "#33A02C"),
                             Metformin = c("0" = "white", "1" = "black"),
                             Sex = c(Male = "black", Female = "white"))

#Order genera, based on rowSums
TaxHeatmap <- Taxonomy[order(rowSums(Taxonomy), decreasing = T),]

#Impose a maximum number of plotted genera
TaxHeatmap <- TaxHeatmap[1:min(c(nrow(TaxHeatmap), Orgs)),]

##Then I standardized the orgs into zero mean and unit variance
TaxHeatmap <- data.frame(t(decostand(t(TaxHeatmap), method="standardize")))
#Can also use scale in pheatmap, but not exactly sure what scaling that is being performed

#Make dataframe with Metadata for heatmap annotation
colannodf <- data.frame(Metadata[, HeatmapExplainers], row.names = Metadata$MicrobiomeID)

#Calculate sample-distance matrix
#Note, that this is done on the full set, not just the shown. Makes sense eventhough not
#show in heatmap they can be in the clustering calculations, this also means samples can
#look more similar in the heatmap but not cluster as closely. Also calculates on the not
#log transformed data.
#filtering of the Counttable depending on rowSums.
Tax2 <- Taxonomy[rowSums(Taxonomy)>0,] #Removing all rows that only contains zeroes
#Tax2 <- Tax2[rowSums(Tax2)>(5*ncol(Tax2)),] #Removing all rows(Species) that is below an
#average count of 5.
# replace 0 values with an estimate using simple multiplicative replacement
#Tax2 <- t(cmultRepl(t(Tax2), method="CZM", label=0))
#Maks TSS
Tax2<-sweep(Tax2, 2, colSums(Tax2), FUN="/")
#Calculate sample-distance matrix
#Note, that this is done on the full set, not just the shown. Makes sense eventhough not
#show in heatmap they can be in the clustering calculations, this also means samples can
#look more similar in the heatmap but not cluster as closely. Also calculates on the not
#log transformed data.
#distmatrix_Species <- vegdist(ilr(t(Tax2)), method="euclidean") #Previously

```

```

dismatrix_Species <- vegdist(decostand(t(Tax2), method="hellinger"), method="bray")

#Draw the heatmap
pdf(paste("MicroLADA_Heatmap_Func", ".pdf", sep=""), width=15, height=5)
pheatmap(TaxHeatmap,
  #color = colorRampPalette(rev(brewer.pal(n = 7, name = "Blues")))(100),
  color = colorRampPalette(rev(brewer.pal(n = 7, name = "RdYlBu")))(100),
  margins=c(8,8),
  treeheight_row = 70,
  treeheight_col = 70,
  scale="none",
  clustering_distance_cols = dismatrix_Species,
  clustering_distance_rows = OrgCluster,
  annotation_col = colannodf,
  cutree_cols = 2,
  show_colnames = FALSE,
  #cellwidth=5,
  #cellheight=4,
  fontsize=10,
  annotation_colors = annotation_colorsNew[1:7],
  annotation_legend = TRUE)
dev.off()

```

```

## pdf
## 3

```

```

#Does not output plot to knitr

```

## CCA

```

rm(list=setdiff(ls(), c("Metadata", "MetadataMed", "Feature", "TaxonomyDA", "Taxonomy", "Fig2List")))

#Create a list to hold the plot objects.
Fig2List <- list()

#Norm of Tax. Should be taken into account. The chi square distance that is the basis of
#cca makes raw counts appropriate.
#See https://sites.google.com/site/mb3gustame/reference/dissimilarity

#Filtering of the Counttable depending on rowSums. Prevents overplotting
Taxonomy2 <- Taxonomy[rowSums(Taxonomy)>(50*length(Taxonomy)),]
#Taxonomy2<-Taxonomy

##Total sum scaling (Use relative abundances)
Taxonomy2<-sweep(Taxonomy2, 2, colSums(Taxonomy2), FUN="/")

##Perform cca
ccaord <- cca(t(Taxonomy2) ~ Diagnosis + Condition(Metformin), Metadata)
ccaord

```

```
## Call: cca(formula = t(Taxonomy2) ~ Diagnosis + Condition(Metformin),
## data = Metadata)
##
##              Inertia Proportion Rank
## Total          0.0256833  1.0000000
## Conditional    0.0003353  0.0130559   1
## Constrained    0.0006626  0.0257970   3
## Unconstrained  0.0246853  0.9611432  73
## Inertia is scaled Chi-square
##
## Eigenvalues for constrained axes:
##   CCA1      CCA2      CCA3
## 0.0004234 0.0001989 0.0000402
##
## Eigenvalues for unconstrained axes:
##   CA1      CA2      CA3      CA4      CA5      CA6      CA7      CA8
## 0.007451 0.005424 0.003383 0.003040 0.002349 0.000868 0.000473 0.000359
## (Showing 8 of 73 unconstrained eigenvalues)
```

```
#summary(ccaord)
plot(ccaord)
```

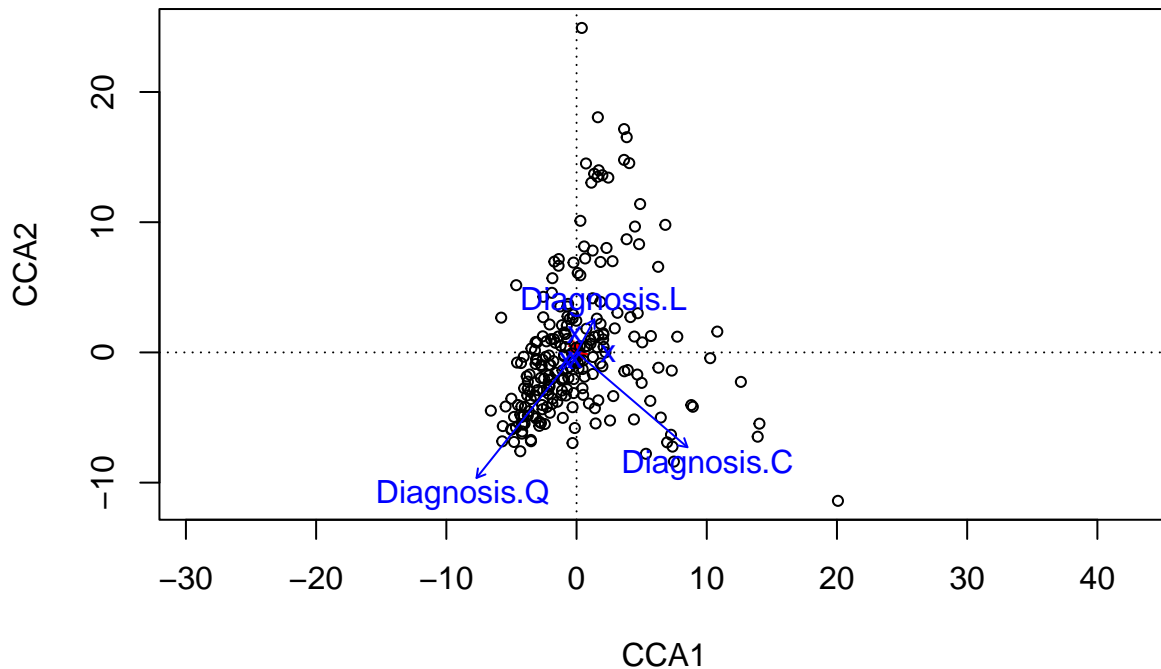

```
anova(ccaord) #Only Diagnosis
```

```
## Permutation test for cca under reduced model
```



```

## Permutation: free
## Number of permutations: 999
##
## Model: cca(formula = t(Taxonomy2) ~ Diagnosis + Condition(Metformin), data = Metadata)
##           Df ChiSquare    F Pr(>F)
## Model      3 0.0006626 2.013 0.011 *
## Residual 225 0.0246853
## ---
## Signif. codes:  0 '***' 0.001 '**' 0.01 '*' 0.05 '.' 0.1 ' ' 1

```

```

##Other model
#ccaord2 <- cca(t(Taxonomy2)-Diagnosis+Metformin, Metadata)
#ccaord2
#summary(ccaord2)
#plot(ccaord2)
#anova(ccaord2, by="margin", permutations=199)

##ggvegan implementation of visualization
#devtools::install_github("gavinsimpson/ggvegan")
#library(ggvegan)
#autoplot(ccaord)

#Custom modification refer to cca object description
#https://www.rdocumentation.org/packages/vegan/versions/2.4-2/topics/cca.object

##My own implementation of cca visualization
#Extract scores from cca object
scores <- vegan::scores(ccaord, display=c("sp", "wa", "cn", "bp"), choices=c(1,2,3))

#Extract site information and add to metadata
sites <- data.frame(scores$sites)
sites$MicrobiomeID <- rownames(sites)
Metadata2 <- merge(Metadata, sites, by="MicrobiomeID")

#Extract species information and add to feature information
species <- data.frame(scores$species)
species$Genus <- rownames(species)
Feature2 <- merge(Feature, species, by="Genus")

##Create column org grouping for colouring
Feature2$Level_1 <- ifelse(Feature2$Level_1=="Metabolism",
                          "Metabolism",
                          ifelse(Feature2$Level_1=="Cellular Processes",
                                  "Cellular Processes",
                                  ifelse(Feature2$Level_1=="Genetic Information Processing",
                                          "Genetic Information Processing",
                                          ifelse(Feature2$Level_1=="Environmental Information Processing",
                                                  "Environmental Information Processing",
                                                  ifelse(Feature2$Level_1=="Unclassified metabolism",
                                                          "Unclassified metabolism",
                                                          "Other")))))
#Order Level_1 for plotting

```

```

Feature2$Level_1 <- factor(Feature2$Level_1,
                          levels=c("Cellular Processes",
                                    "Environmental Information Processing",
                                    "Genetic Information Processing",
                                    "Metabolism",
                                    "Unclassified metabolism",
                                    "Other"))

#Extract information on inertia
inertia <- ccaord$CCA$tot.chi/ccaord$tot.chi
subheader <- paste("Inertia constrained by the explanatory variables",
                   round(inertia, digits=2))

##Extract information on eig
#eig1 <- (cca$CCA$eig[1]/(sum(cca$CCA$eig)+sum(cca$CA$eig)))*100
#eig_1 <- paste("CCA1", round(eig1, digits=2), "% of total variance")
#eig2 <- (cca$CCA$eig[2]/(sum(cca$CCA$eig)+sum(cca$CA$eig)))*100
#eig_2 <- paste("CCA2", round(eig2, digits=2), "% of total variance")

#Add a categorical indicator of group in Metadata
Metadata2$Metformin<-as.factor(ifelse(grepl("1", Metadata2$Metformin), "Yes",
                                       ifelse(grepl("0", Metadata2$Metformin), "No",
                                               "Unknown")))

#Order Treatment metformine for plotting
Metadata2$Metformin <- factor(Metadata2$Metformin, levels=c("Yes", "No", "Unknown"))

arrows<-data.frame(scores$centroids)
arrows$xstart<-0
arrows$ystart<-0
arrows$namings<-row.names(arrows)
arrows$namings<-str_remove(arrows$namings, "Diagnosis")

##Add text specific organisms to plot
#textgenus<-Feature2 %>% dplyr::select(one_of("Genus", "CCA1", "CCA2")) %>%
# filter(Genus=="Faecalibacterium" |
#         Genus=="Actinomyces" |
#         Genus=="Butyrificoccus" |
#         Genus=="Lachnoclostridium")

p1<-ggplot() +
  geom_point(data=Metadata2[which(Metadata2$Diagnosis=='Control'), ],
            aes(x=CCA1, y=CCA2, shape=Metformin, group=Diagnosis),
            color="#666666", size=1.5, alpha=0.5) +
  geom_point(data=Metadata2[which(Metadata2$Diagnosis=='T1D'), ],
            aes(x=CCA1, y=CCA2, shape=Metformin, group=Diagnosis),
            color="#1F78B4", size=1.5, alpha=0.5) +
  geom_point(data=Metadata2[which(Metadata2$Diagnosis=='T2D'), ],
            aes(x=CCA1, y=CCA2, shape=Metformin, group=Diagnosis),
            color="#33A02C", size=1.5, alpha=0.5) +
  geom_point(data=Metadata2[which(Metadata2$Diagnosis=='LADA'), ],
            aes(x=CCA1, y=CCA2, shape=Metformin, group=Diagnosis),
            color="#E31A1C", size=1.5, alpha=0.5) +

```

```

scale_shape_manual(values=c(3, 16)) +
geom_point(data=Feature2[which(Feature2$Level_1=="Cellular Processes"), ],
  aes(x=CCA1, y=CCA2, group=Genus, color="#A6CEE3", shape=18, size=0.7) +
geom_point(data=Feature2[which(Feature2$Level_1=="Genetic Information Processing"), ],
  aes(x=CCA1, y=CCA2, group=Genus, color="#FB9A99", shape=18, size=0.7) +
geom_point(data=Feature2[which(Feature2$Level_1=="Metabolism"), ],
  aes(x=CCA1, y=CCA2, group=Genus, color="#FDBF6F", shape=18, size=0.7) +
geom_point(data=Feature2[which(Feature2$Level_1=="Environmental Information Processing"), ],
  aes(x=CCA1, y=CCA2, group=Genus,
    color="#B2DF8A", shape=18, size=0.7, alpha=0.75) +
geom_point(data=Feature2[which(Feature2$Level_1=="Unclassified metabolism"), ],
  aes(x=CCA1, y=CCA2, group=Genus, color="#CAB2D6", shape=18, size=0.7) +
geom_point(data=Feature2[which(Feature2$Level_1=="Other"), ],
  aes(x=CCA1, y=CCA2, group=Genus, color="#B3B3B3", shape=18, size=0.7) +
geom_segment(data=arrows, aes(x=xstart, y=ystart, xend=CCA1, yend=CCA2),
  arrow=arrow(length = unit(0.01, "npc"))) +
geom_text(data=arrows, aes(x = CCA1, y = CCA2, label = naming),
  hjust = 0, nudge_x = 0.05, size=6) +
theme_bw() +
theme(panel.grid.major = element_blank(),
  panel.grid.minor = element_blank(),
  axis.title=element_text(size=22),
  legend.position="none",
  legend.title=element_text(size=20),
  legend.text=element_text(size=20),
  axis.text.x = element_text(angle = 45, hjust = 1, size=12),
  axis.text.y = element_text(angle = 45, hjust = 1, size=12)) +
scale_y_reverse()
pdf("MicroLADA_CCA_Func.pdf", width=9, height=6)
p1
dev.off()

```

```

## pdf
## 2

```

```

#Save to list
Fig2List[[ "CCAalls" ]] <- p1

#Created plotly version only to be able to look into specific genera plotted
ggplotly(p1)

```

```

ggplotly(p1+xlim(-1.5, 2.5)+ylim(-1.5,2))

```

```

#Overlay plots with couplot
p2<-p1+xlim(-1.5, 2.5)+ylim(-1.5,2)
p2<-ggplot() +
# geom_point(data=Metadata2[which(Metadata2$Diagnosis=='Control'), ],
# aes(x=CCA1, y=CCA2, shape=Metformin, group=Diagnosis),
# color="#666666", size=1.5, alpha=0.5) +
# geom_point(data=Metadata2[which(Metadata2$Diagnosis=='T1D'), ],
# aes(x=CCA1, y=CCA2, shape=Metformin, group=Diagnosis),
# color="#1F78B4", size=1.5, alpha=0.5) +

```

```

# geom_point(data=Metadata2[which(Metadata2$Diagnosis=='T2D'), ],
#           aes(x=CCA1, y=CCA2, shape=Metformin, group=Diagnosis),
#           color="#33A02C", size=1.5, alpha=0.5) +
# geom_point(data=Metadata2[which(Metadata2$Diagnosis=='LADA'), ],
#           aes(x=CCA1, y=CCA2, shape=Metformin, group=Diagnosis),
#           color="#E31A1C", size=1.5, alpha=0.5) +
scale_shape_manual(values=c(3, 16)) +
geom_point(data=Feature2[which(Feature2$Level_1=="Cellular Processes"), ],
           aes(x=CCA1, y=CCA2, group=Genus), color="#A6CEE3", shape=18, size=3) +
geom_point(data=Feature2[which(Feature2$Level_1=="Genetic Information Processing"), ],
           aes(x=CCA1, y=CCA2, group=Genus), color="#FB9A99", shape=18, size=3) +
geom_point(data=Feature2[which(Feature2$Level_1=="Metabolism"), ],
           aes(x=CCA1, y=CCA2, group=Genus), color="#FDBF6F", shape=18, size=3) +
geom_point(data=Feature2[which(Feature2$Level_1=="Environmental Information Processing"), ],
           aes(x=CCA1, y=CCA2, group=Genus),
           color="#B2DF8A", shape=18, size=3, alpha=0.75) +
geom_point(data=Feature2[which(Feature2$Level_1=="Unclassified metabolism"), ],
           aes(x=CCA1, y=CCA2, group=Genus), color="#CAB2D6", shape=18, size=3) +
geom_point(data=Feature2[which(Feature2$Level_1=="Other"), ],
           aes(x=CCA1, y=CCA2, group=Genus), color="#B3B3B3", shape=18, size=3) +
geom_segment(data=arrows, aes(x=xstart, y=ystart, xend=CCA1, yend=CCA2),
            arrow=arrow(length = unit(0.01, "npc"))) +
geom_text(data=arrows, aes(x = CCA1, y = CCA2, label = naming),
         hjust = 0, nudge_x = 0.05, size=10) +
# geom_text(data=textgenus, aes(x = CCA1, y = CCA2, label = Genus),
#           hjust = 0, nudge_x = 0.05, size=8) +
theme_bw() +
theme(panel.grid.major = element_blank(),
      panel.grid.minor = element_blank(),
      axis.title=element_text(size=30),
      legend.position="none",
      legend.title=element_text(size=20),
      legend.text=element_text(size=20),
      axis.text.x = element_text(angle = 45, hjust = 1, size=22),
      axis.text.y = element_text(angle = 45, hjust = 1, size=22)) +
scale_y_reverse() +
xlim(-2.5, 2.5) +
ylim(-1.5,2)

p3<-p1 + theme(axis.line=element_blank(),
              axis.text.x=element_blank(),
              axis.text.y=element_blank(),
              axis.ticks=element_blank(),
              axis.title.x=element_blank(),
              axis.title.y=element_blank(),
              legend.position="none",
              panel.background=element_blank(),
              #panel.border=element_blank(),
              panel.grid.major=element_blank(),
              panel.grid.minor=element_blank(),
              plot.background=element_blank())

```

```
ggdraw(p2) + draw_plot(p3, x = 0.30, y = -0.22, scale = 0.40)
```

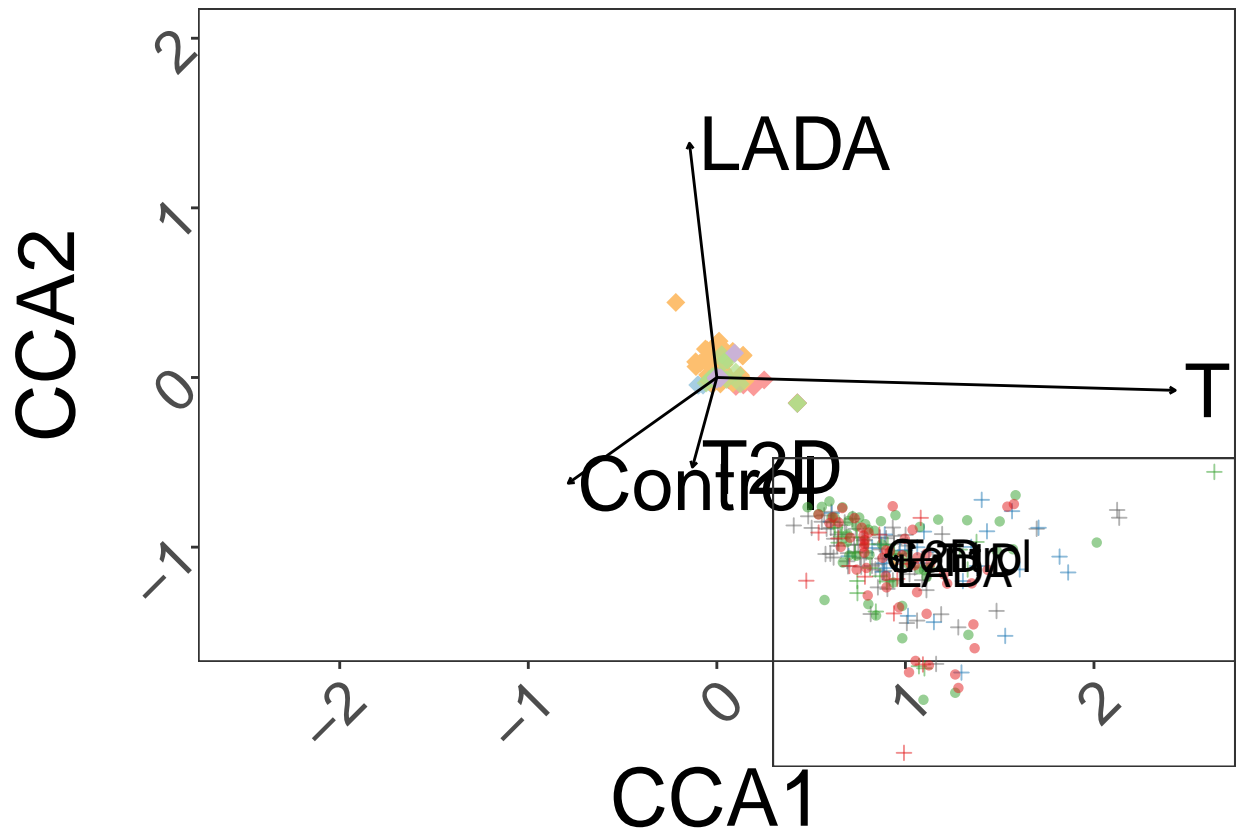

```
p4<-ggdraw(p2) + draw_plot(p3, x = 0.30, y = -0.18, scale = 0.40) #-22 below axis
#Save to list
Fig2List[[ "CCAoverlay" ]] <- p4
pdf("MicroLADA_CCAoverlay_Func.pdf", width=9, height=6)
p4
dev.off()
```

```
## pdf
## 2
```

```
##Extract legends
#Extract legends Level_1
Orgcol<-c("Cellular Processes" = "#A6CEE3",
          "Genetic Information Processing" = "#FB9A99",
          "Metabolism" = "#FDBF6F",
          "Environmental Information Processing" = "#B2DF8A",
          "Unclassified metabolism" = "#CAB2D6",
          "Other" = "#B3B3B3")
#Plot with only legend colors for Level_1
legend<-ggplot() +
  geom_point(data=Feature2, aes(x=CCA1, y=CCA2, group=Genus, color=Level_1),
            shape=18, size=6) +
```

```

scale_color_manual(values=Orgcol) +
theme_bw() +
theme(legend.title=element_text(size=16),
      legend.text=element_text(size=14),
      legend.position="bottom")
#Store legends
legendplot<-get_legend(legend)
pdf("LegendCCALevel_1_bottom_Func.pdf", width=24, height=12)
grid.arrange(legendplot)
dev.off()

```

```

## pdf
## 2

```

```

#Save to list
Fig2List[[ "legendLevel_1bottom" ]] <- legendplot

#Plot with only legend colors for Level_1
legend<-ggplot() +
  geom_point(data=Feature2, aes(x=CCA1, y=CCA2, group=Genus, color=Level_1),
            shape=18, size=6) +
  scale_color_manual(values=Orgcol) +
  theme_bw() +
  theme(legend.title=element_text(size=16),
        legend.text=element_text(size=14),
        legend.position="right")
#Store legends
legendplot<-get_legend(legend)
pdf("LegendCCALevel_1_right_Func.pdf", width=24, height=12)
grid.arrange(legendplot)
dev.off()

```

```

## pdf
## 2

```

```

#Save to list
Fig2List[[ "legendLevel_1right" ]] <- legendplot

#Extract legends diagnosis
legend<-ggplot() +
  geom_point(data=Metadata2,
            aes(x=CCA1, y=CCA2, shape=Metformin, color=Diagnosis, group=Diagnosis),
            size=6, alpha=0.5) +
  scale_shape_manual(values=c(3, 16)) +
  scale_color_manual(values=c(Control = "#666666", T1D = "#1F78B4",
                              T2D = "#33A02C", LADA = "#E31A1C")) +
  theme_bw() +
  theme(legend.title=element_text(size=16),
        legend.text=element_text(size=14),
        legend.position="bottom")
#Store legends
legendplot<-get_legend(legend)

```

```
pdf("LegendCCAsamples_bottom_Func.pdf", width=24, height=12)
grid.arrange(legendplot)
dev.off()
```

```
## pdf
## 2
```

```
#Save to list
Fig2List[[ "legendsamplesbottom" ]] <- legendplot

#Extract legends diagnosis
legend<-ggplot() +
  geom_point(data=Metadata2,
             aes(x=CCA1, y=CCA2, shape=Metformin, color=Diagnosis, group=Diagnosis),
             size=6, alpha=0.5) +
  scale_shape_manual(values=c(3, 16)) +
  scale_color_manual(values=c(Control = "#666666", T1D = "#1F78B4",
                               T2D = "#33A02C", LADA = "#E31A1C")) +
  theme_bw() +
  theme(legend.title=element_text(size=16),
        legend.text=element_text(size=14),
        legend.position="right")

#Store legends
legendplot<-get_legend(legend)
pdf("LegendCCAsamples_right_Func.pdf", width=24, height=12)
grid.arrange(legendplot)
dev.off()
```

```
## pdf
## 2
```

```
#Save to list
Fig2List[[ "legendsamplesright" ]] <- legendplot
```

## DESeq2 LRT

Analysis of deviance ANODEV

Size factors as column sums (Relative abundance), Total count standardized relative abundance as column sums

```
rm(list=setdiff(ls(), c("Metadata", "MetadataMed", "Feature", "TaxonomyDA", "Taxonomy", "Fig2List")))
```

```
#Can also be run with metformin as covariate, but decided not to due to treatment follow diagnosis.
```

```
#Better to compare with analysis run with individuals receiving metformin removed.
```

```
#Reassign names
```

```
Metadata2<-Metadata
```

```
Taxonomy2<-TaxonomyDA
```

```

#The factor can not be ordered for DESeq to run
Metadata2$Diagnosis<-factor(Metadata2$Diagnosis, ordered=FALSE)

#Create design formula
#design <- formula(paste("~ ", "Diagnosis", "+", "Metformin"))
design <- formula(paste("~ ", "Diagnosis", "+", "BMIq"))
#design <- formula(paste("~ ", "Diagnosis"))
#Create DESeq2 object with matrix and metadata
dds <- DESeqDataSetFromMatrix(countData = Taxonomy2,
                              colData = Metadata2,
                              design = design)

##Assess and calculate size factors using the different methods
SF<-data.frame(Ratio=sizeFactors(estimateSizeFactors(dds, type="ratio")),
              Poscounts=sizeFactors(estimateSizeFactors(dds, type="poscounts")),
              Iterate=sizeFactors(estimateSizeFactors(dds, type="poscounts")),
              # "iterate" takes a lot of time changed to "poscounts" but kept due to the
              # following code
              Relative=colSums(Taxonomy2)/mean(colSums(Taxonomy2))
              )
SF<-add_rownames(SF, var="MicrobiomeID")
#Adding total abundances
# old path path<-paste("Q:/",
#                       "Projects/",
#                       "LADA/",
#                       "LADA_Sandra_Evelina/",
#                       "LADA_JKV/",
#                       "LADA_R_AfterFlow_Analysis_FinalCounts/",
#                       "LADA_FinalCounts/",
#                       "2019-09-03_CountAnalysis.rds", sep="")

path <- paste("J:/",
             "CBMR/",
             "SUN-CBMR-Hansen-Group/",
             "Projects/",
             "LADA/",
             "LADA_Sandra_Evelina/",
             "LADA_JKV/",
             "LADA_R_AfterFlow_Analysis_FinalCounts/",
             "LADA_FinalCounts/",
             "2019-09-03_CountAnalysis.rds", sep="")

TotalCounts<-readRDS(path)
TotalCountsProcess <-
  data.frame(MicrobiomeID=TotalCounts$DF_Save_w$ID,
             CellNorm=TotalCounts$DF_Save_w$Cells_per_g_feces_FR_corrected_mean)
TotalCountsProcess$MicrobiomeID <- paste("L", TotalCountsProcess$MicrobiomeID,
                                         sep="")
SF2<-merge(SF, TotalCountsProcess, by="MicrobiomeID")

```



```

#One value is NaN in sample 602059 assigns value as average
SF2$CellNorm[is.nan(SF2$CellNorm)]<-mean(na.omit(SF2$CellNorm))

SF2$CellNormStand<-SF2$CellNorm/mean(SF2$CellNorm) #Watch out for NaN values can assign
#average, but wants the error

SF3<-merge(Metadata2, SF2, by="MicrobiomeID")
#DESeq divides with sizeFactor (High cell count should have low sizeFactor providing
#larger counts in a sample)
#Still have to consider seq data is relative
SF3$NormRelCell<-SF3$Relative/SF3$CellNormStand
#Overview of normalization factors
aggregate(SF3[, 14:20], list(SF3$Diagnosis), mean) #Have to run heatmap chunk adding sex

```

```

##   Group.1   Ratio Poscounts  Iterate  Relative   CellNorm CellNormStand
## 1 Control 1.070161  1.059005 1.059005 0.9884311 20384275367   1.0420944
## 2   T1D 1.105743  1.096874 1.096874 1.0263342 18731782275   0.9576149
## 3   LADA 1.093748  1.089036 1.089036 0.9984496 18940404238   0.9682802
## 4   T2D 1.087719  1.081155 1.081155 1.0016117 19624620327   1.0032590
##   NormRelCell
## 1   1.016138
## 2   1.210062
## 3   1.092808
## 4   1.139338

```

```

#to metadata
aggregate(SF3[, 14:20], list(SF3$Diagnosis), sd)

```

```

##   Group.1   Ratio Poscounts  Iterate  Relative   CellNorm CellNormStand
## 1 Control 0.4597056 0.4523032 0.4523032 0.4273249 6781846681   0.3467047
## 2   T1D 0.4010043 0.3962703 0.3962703 0.3829215 5712095609   0.2920164
## 3   LADA 0.4434083 0.4388107 0.4388107 0.4058688 5544046390   0.2834253
## 4   T2D 0.3344981 0.3296724 0.3296724 0.3105289 6146706989   0.3142348
##   NormRelCell
## 1   0.4752640
## 2   0.6768389
## 3   0.4609629
## 4   0.6643237

```

```

pairs(SF3[, c(14:17,19,20)], col=SF3$Diagnosis)

```

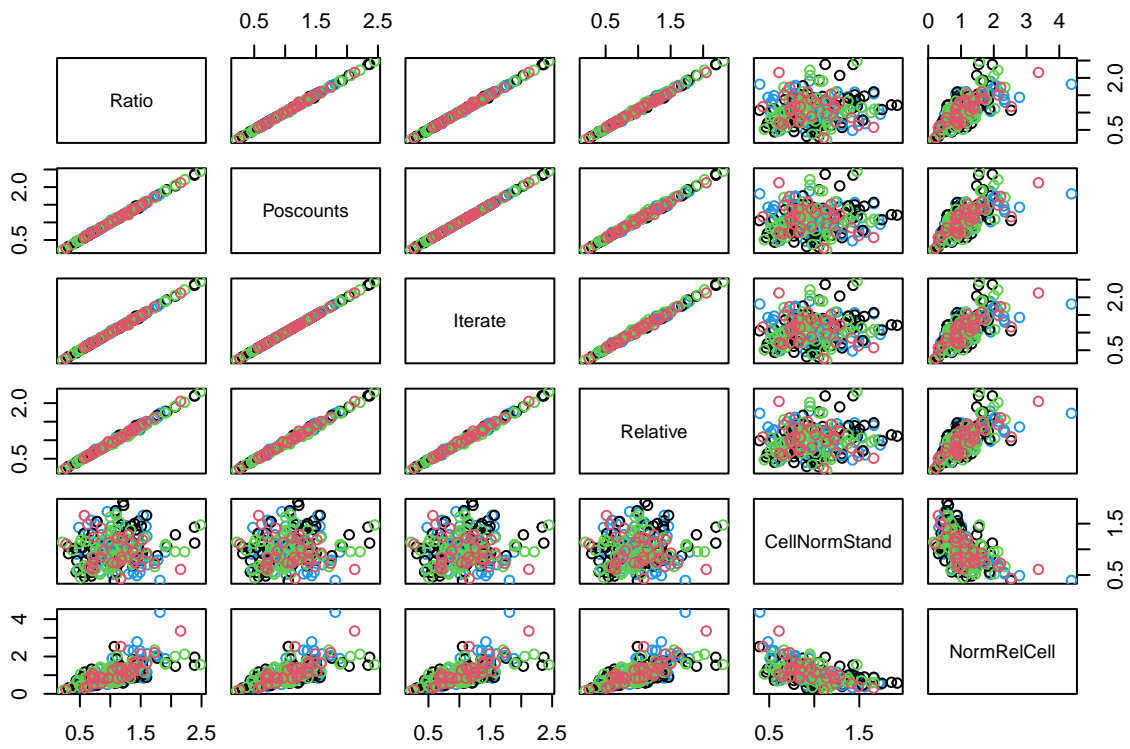

```
pairs(SF3[, c(15,17,19,20)], col=SF3$Diagnosis)
```

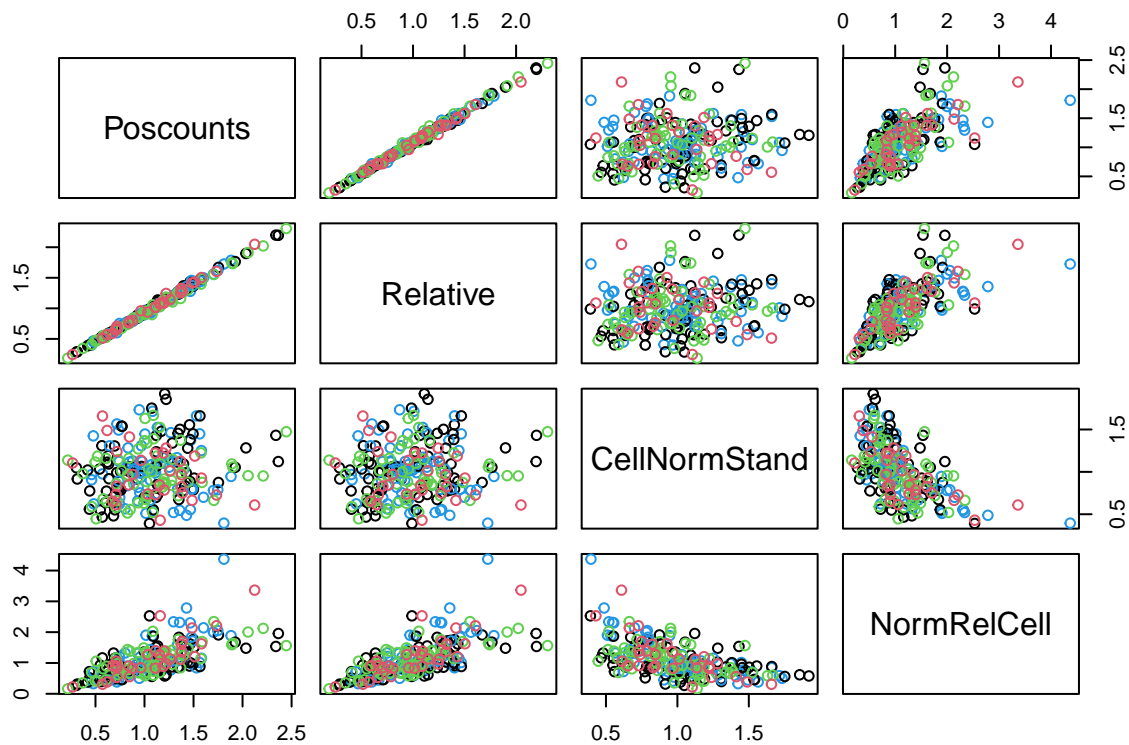

```
#I do want CellNormStand and NormRelCell to be negatively correlated due to DESeq divide
#with sizeFactor. It is also good that CellNormStand seems uncorrelated to the other
#normalization factors.
```

```
##Select size factors calculated above for normalization
dds@colData@listData$sizeFactor <- SF3[,20]
#hist(dds@colData@listData$sizeFactor)
#colnames(SF3[13])
normname<-colnames(SF3[20])

##See vignette for note on factor levels
#Filtering of the Counttable. Bare minimum is performed later. Also to reduce memory of
#the dds
dds2 <- dds[ rowSums(counts(dds))>50*length(Taxonomy2),] #Previously 0 instead of 1

#Estimate dispersions and fit the GLM
#dds2 <- DESeq(dds2, test="LRT", reduced = ~Metformin)
dds2 <- DESeq(dds2, test="LRT", reduced = ~1)

res<-results(dds2)
summary(res)
```

```
##
## out of 197 with nonzero total read count
```

```
## adjusted p-value < 0.1
## LFC > 0 (up)      : 11, 5.6%
## LFC < 0 (down)   : 4, 2%
## outliers [1]     : 0, 0%
## low counts [2]   : 0, 0%
## (mean count < 64)
## [1] see 'cooksCutoff' argument of ?results
## [2] see 'independentFiltering' argument of ?results
```

```
resultsNames(dds2)
```

```
## [1] "Intercept"          "Diagnosis_T1D_vs_Control"
## [3] "Diagnosis_LADA_vs_Control" "Diagnosis_T2D_vs_Control"
## [5] "BMIq"
```

```
##MA plots from inbuilt DESeq function
plotMA(dds2, alpha=0.1)
```

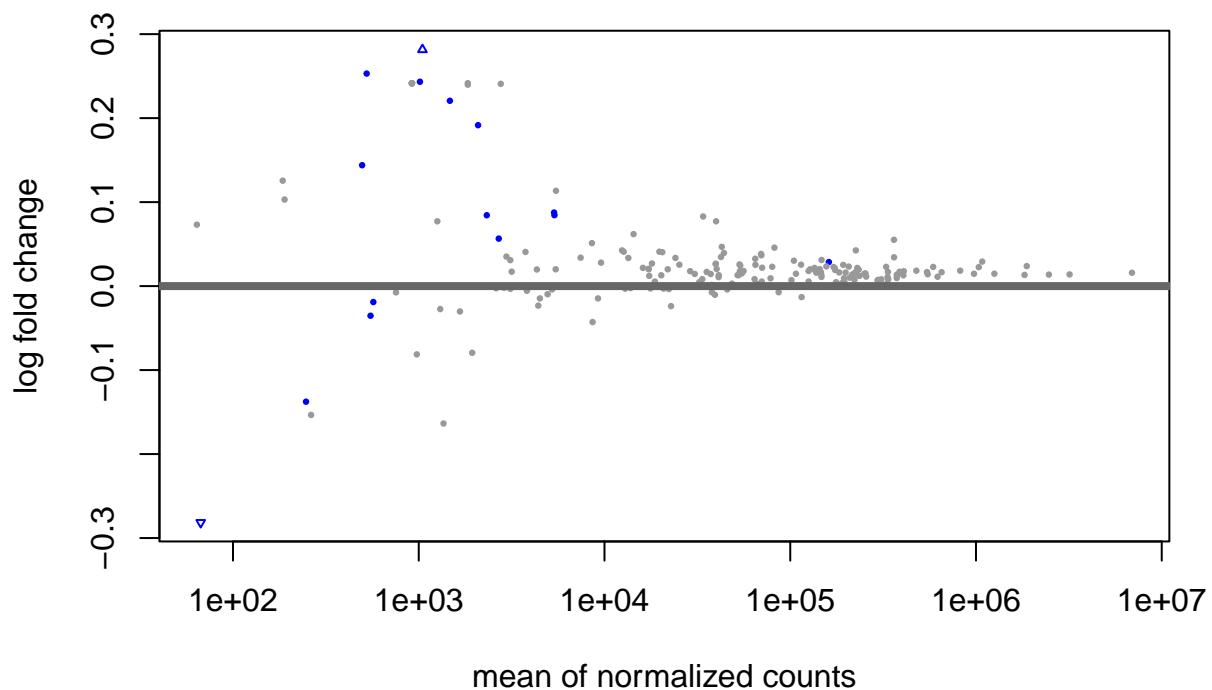

```
plotMA(res, ylim=c(-2,2))
```

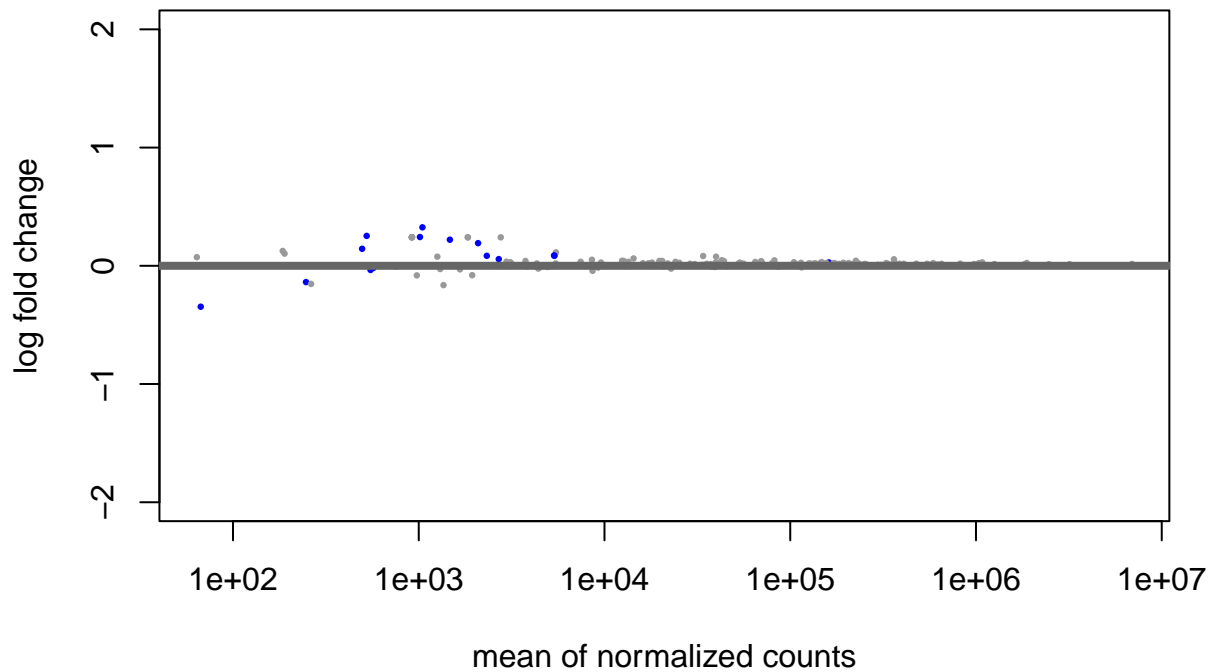

```

#Unshrunken/shrunken
#res<-results(dds2, addMLE=TRUE)
#resLFC <- DESeq2::lfcShrink(dds2, coef=2)
#resLFC
#DESeq2::plotMA(resLFC, ylim=c(-2,2))

#Make histogram
#pdf(paste("HistogramDESeq_Func", ".pdf", sep=""), height=6, width=12)
hist(res$pvalue[res$baseMean > 1], breaks = 0:20/20,
      col = "grey50", border = "white")

```

### Histogram of res\$pvalue[res\$baseMean > 1]

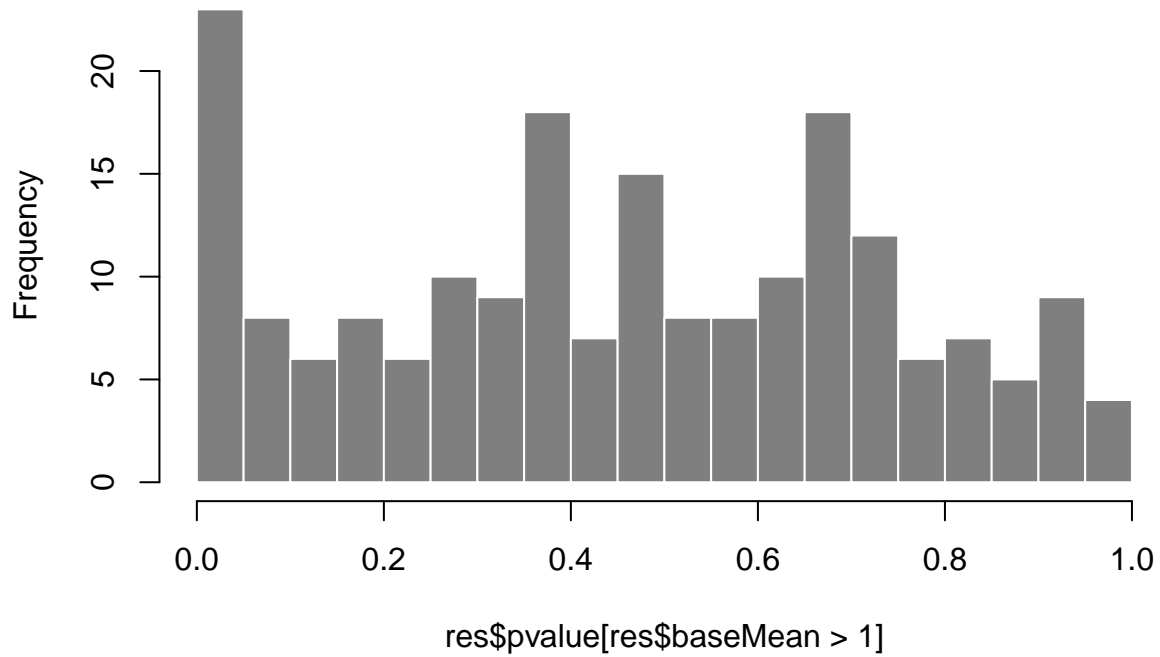

```
#dev.off()  
  
#Show dispersion plot with shrinkage  
#pdf(paste("DispersionplotDESeq_Func", ".pdf", sep=""), height=9, width=12)  
plotDispEsts(dds2)
```

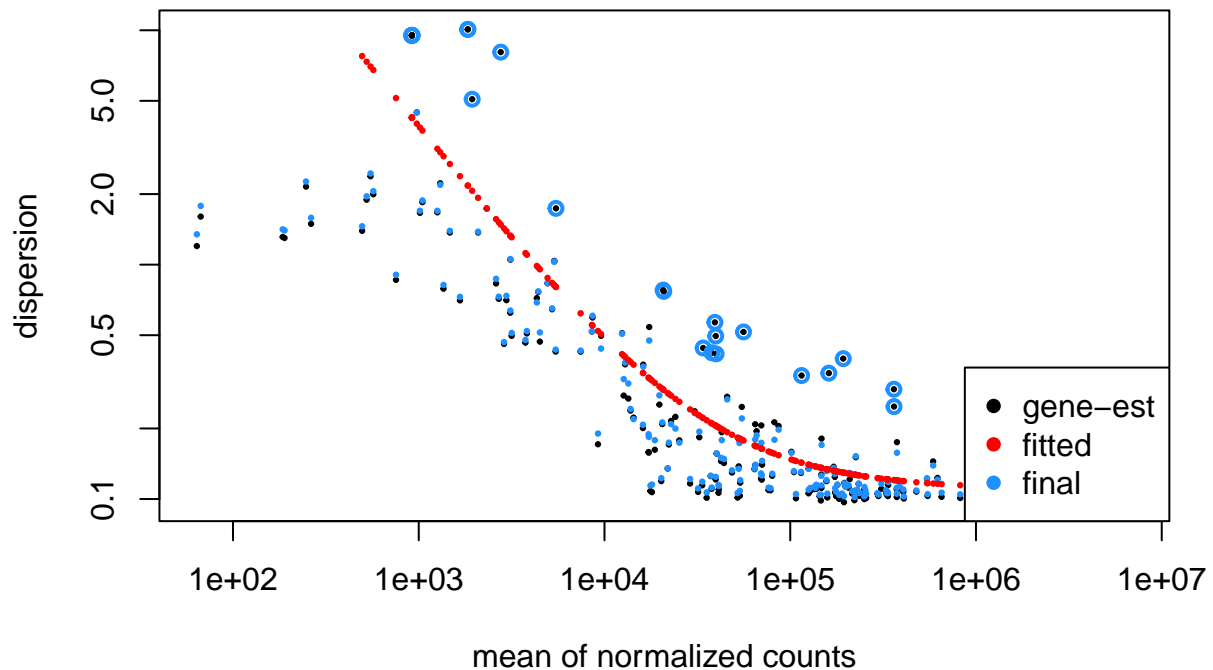

```

#dev.off()

##Plot PCA
#dds2_rlog<-rlogTransformation(dds2)
##pdf(paste("PCADESeq", "_Func.pdf", sep=""), height=9, width=9)
#plotPCA(dds2_rlog, intgroup=c("Diagnosis"))+coord_fixed()
##dev.off()

#Data structuring
resSig=subset(res, pvalue<0.05) #Could also have selected other value or padj
df <- data.frame(res)
dfSig <- data.frame(resSig)

#Save table.
write.table(dfSig, file="DESeq_SigLRT_Func.txt", sep="\t", dec=",", row.names = T)
print("Significant LRT")

```

```
## [1] "Significant LRT"
```

```
kable(dfSig)
```

|                                                                           | baseMean     | log2FoldChange | lfcSE     | stat      | pvalue    | padj      |
|---------------------------------------------------------------------------|--------------|----------------|-----------|-----------|-----------|-----------|
| p53 signaling pathway [PATH:ko04115]                                      | 67.03765     | -              | 0.1234586 | 17.868335 | 0.0013094 | 0.0214960 |
|                                                                           |              | 0.3462220      |           |           |           |           |
| Bacterial chemotaxis [PATH:ko02030]                                       | 161375.11235 | 0.286387       | 0.0539908 | 5.062812  | 0.0045727 | 0.0643444 |
| Flagellar assembly [PATH:ko02040]                                         | 192929.94040 | 0.253150       | 0.0579786 | 3.237947  | 0.0101698 | 0.1252158 |
| Biofilm formation - Escherichia coli [PATH:ko02026]                       | 147465.48787 | 0.311363       | 0.0379490 | 9.944097  | 0.0413800 | 0.3544284 |
| Biofilm formation - Pseudomonas aeruginosa [PATH:ko02025]                 | 82196.16110  | 0.0457934      | 0.0389151 | 12.165083 | 0.0161650 | 0.1676053 |
| Two-component system [PATH:ko02020]                                       | 588209.87940 | 0.228148       | 0.0342942 | 0.055614  | 0.0395012 | 0.3537154 |
| Betalain biosynthesis [PATH:ko00965]                                      | 524.40214    | 0.2530536      | 0.1288235 | 8.867950  | 0.0000000 | 0.0000000 |
| Glycosphingolipid biosynthesis - lacto and neolacto series [PATH:ko00601] | 247.27768    | -              | 0.1385842 | 6.900184  | 0.0020212 | 0.0306288 |
|                                                                           |              | 0.1376275      |           |           |           |           |
| alpha-Linolenic acid metabolism [PATH:ko00592]                            | 1471.389760  | 0.2206515      | 0.1086613 | 3.388650  | 0.0000000 | 0.0000000 |
| Arachidonic acid metabolism [PATH:ko00590]                                | 3111.360130  | 0.0308902      | 0.0734511 | 2.640277  | 0.0131740 | 0.1441822 |
| Ether lipid metabolism [PATH:ko00565]                                     | 495.64764    | 0.1439061      | 0.1112097 | 3.197018  | 0.0000000 | 0.0000000 |
| Linoleic acid metabolism [PATH:ko00591]                                   | 1047.128140  | 0.3253528      | 0.1261657 | 4.732581  | 0.0000000 | 0.0000000 |
| Retinol metabolism [PATH:ko00830]                                         | 4324.772250  | 0.0197545      | 0.0764130 | 12.799084 | 0.0123004 | 0.1425399 |
| Biosynthesis of ansamycins [PATH:ko01051]                                 | 40162.46897  | 0.0204030      | 0.0364185 | 10.115690 | 0.0385232 | 0.3537154 |
| Biosynthesis of siderophore group nonribosomal peptides [PATH:ko01053]    | 12436.02750  | 0.0424890      | 0.0655159 | 11.300248 | 0.0233890 | 0.2303819 |
| Carotenoid biosynthesis [PATH:ko00906]                                    | 2324.428280  | 0.0843719      | 0.1210795 | 2.217312  | 0.0001814 | 0.0032489 |
| Geraniol degradation [PATH:ko00281]                                       | 2086.546120  | 0.1916058      | 0.1081870 | 1.573730  | 0.0000000 | 0.0000000 |
| Caprolactam degradation [PATH:ko00930]                                    | 2696.884680  | 0.0565364      | 0.0786140 | 4.456868  | 0.0059710 | 0.0784193 |
| Drug metabolism - cytochrome P450 [PATH:ko00982]                          | 5377.283440  | 0.0844695      | 0.0934196 | 12.585161 | 0.0000000 | 0.0000003 |
| Ethylbenzene degradation [PATH:ko00642]                                   | 1015.072290  | 0.2433126      | 0.1199433 | 7.995719  | 0.0000000 | 0.0000000 |
| Fluorobenzoate degradation [PATH:ko00364]                                 | 550.12354    | -              | 0.1440534 | 0.316102  | 0.0000042 | 0.0000831 |
|                                                                           |              | 0.0352785      |           |           |           |           |
| Metabolism of xenobiotics by cytochrome P450 [PATH:ko00980]               | 5353.442940  | 0.0875807      | 0.0933537 | 12.270019 | 0.0000000 | 0.0000003 |
| Toluene degradation [PATH:ko00623]                                        | 569.52117    | -              | 0.1320982 | 1.254154  | 0.0000000 | 0.0000000 |
|                                                                           |              | 0.0189657      |           |           |           |           |

## DESeq2 LRT remove metformin

Analysis of deviance ANODEV

Size factors as column sums (Relative abundance), Total count standardized relative abundance as column sums

```
rm(list=setdiff(ls(), c("Metadata", "MetadataMed", "Feature", "TaxonomyDA", "Taxonomy",
                        "Fig2List")))

#Reassign names
#Metadata2<-Metadata
Taxonomy2<-TaxonomyDA

##Removing treated with metformin
#Metadata$Metformin <- ifelse(is.na(Metadata$Metformin), "Unknown", Metadata$Metformin)
Metadata2<-filter(Metadata, !Metformin == 1)
##Applying subsetting to OTU tables
Taxonomy2<-dplyr::select(Taxonomy2, one_of(as.character(Metadata2$MicrobiomeID)))
```



```

##Remove orgs that are not present after subsetting.
Taxonomy2 <- Taxonomy2[rowSums(Taxonomy2)>0,]

#Can also be run with metformin as covariate, but decided not to due to treatment follow
#diagnosis.
#Better to compare with analysis run with individuals receiving metformin removed.
#As performed here

#The factor can not be ordered for DESeq to run
Metadata2$Diagnosis<-factor(Metadata2$Diagnosis, ordered=FALSE)

#Create design formula
#design <- formula(paste("~ ", "Diagnosis", "+", "Metformin"))
design <- formula(paste("~ ", "Diagnosis", "+", "BMIq"))
#design <- formula(paste("~ ", "Diagnosis"))
#Create DESeq2 object with matrix and metadata
dds <- DESeqDataSetFromMatrix(countData = Taxonomy2,
                              colData = Metadata2,
                              design = design)

##Assess and calculate size factors using the different methods
SF<-data.frame(Ratio=sizeFactors(estimateSizeFactors(dds, type="ratio")),
              Poscounts=sizeFactors(estimateSizeFactors(dds, type="poscounts")),
              Iterate=sizeFactors(estimateSizeFactors(dds, type="poscounts")),
              # "iterate" takes a lot of time changed to "poscounts" but kept due to the
              # following code
              Relative=colSums(Taxonomy2)/mean(colSums(Taxonomy2))
              )
SF<-add_rownames(SF, var="MicrobiomeID")
#Adding total abundances
# old path path<-paste("Q:/",
#                       "Projects/",
#                       "LADA/",
#                       "LADA_Sandra_Evelina/",
#                       "LADA_JKV/",
#                       "LADA_R_AfterFlow_Analysis_FinalCounts/",
#                       "LADA_FinalCounts/",
#                       "2019-09-03_CountAnalysis.rds", sep="")

path <- paste("J:/",
              "CBMR/",
              "SUN-CBMR-Hansen-Group/",
              "Projects/",
              "LADA/",
              "LADA_Sandra_Evelina/",
              "LADA_JKV/",
              "LADA_R_AfterFlow_Analysis_FinalCounts/",
              "LADA_FinalCounts/",
              "2019-09-03_CountAnalysis.rds", sep="")

```

```

TotalCounts<-readRDS(path)
TotalCountsProcess <-
  data.frame(MicrobiomeID=TotalCounts$DF_Save_w$ID,
             CellNorm=TotalCounts$DF_Save_w$Cells_per_g_feces_FR_corrected_mean)
TotalCountsProcess$MicrobiomeID <- paste("L", TotalCountsProcess$MicrobiomeID,
                                         sep="")
SF2<-merge(SF, TotalCountsProcess, by="MicrobiomeID")

#One value is NaN in sample 602059 assigns value as average
SF2$CellNorm[is.nan(SF2$CellNorm)]<-mean(na.omit(SF2$CellNorm))

SF2$CellNormStand<-SF2$CellNorm/mean(SF2$CellNorm) #Watch out for NaN values can assign
#average, but wants the error

SF3<-merge(Metadata2, SF2, by="MicrobiomeID")
#DESeq divides with sizeFactor (High cell count should have low sizeFactor providing
#larger counts in a sample)
#Still have to consider seq data is relative
SF3$NormRelCell<-SF3$Relative/SF3$CellNormStand
#Overview of normalization factors
aggregate(SF3[, 14:20], list(SF3$Diagnosis), mean) #Have to run heatmap chunk adding sex

```

```

##  Group.1      Ratio Poscounts  Iterate  Relative    CellNorm CellNormStand
## 1 Control 1.094542  1.087591  1.087591  1.0032044  20384275367    1.0722125
## 2   T1D 1.131654  1.127744  1.127744  1.0416740  18731782275    0.9852914
## 3   LADA 1.004481  0.998413  0.998413  0.9142228  15590817082    0.8200767
## 4   T2D 1.069550  1.065472  1.065472  0.9806434  16982538343    0.8932812
##  NormRelCell
## 1      1.002356
## 2      1.193649
## 3      1.193676
## 4      1.191757

```

```

#to metadata
aggregate(SF3[, 14:20], list(SF3$Diagnosis), sd)

```

```

##  Group.1      Ratio Poscounts  Iterate  Relative    CellNorm CellNormStand
## 1 Control 0.4695326  0.4639309  0.4639309  0.4337118  6781846681    0.3567250
## 2   T1D 0.4106770  0.4065139  0.4065139  0.3886448  5712095609    0.3004561
## 3   LADA 0.3345323  0.3282978  0.3282978  0.3071066  4604942130    0.2422199
## 4   T2D 0.3912487  0.3857159  0.3857159  0.3582493  4888235680    0.2571211
##  NormRelCell
## 1      0.4688179
## 2      0.6676588
## 3      0.5263781
## 4      0.5509790

```

```

pairs(SF3[, c(14:17,19,20)], col=SF3$Diagnosis)

```

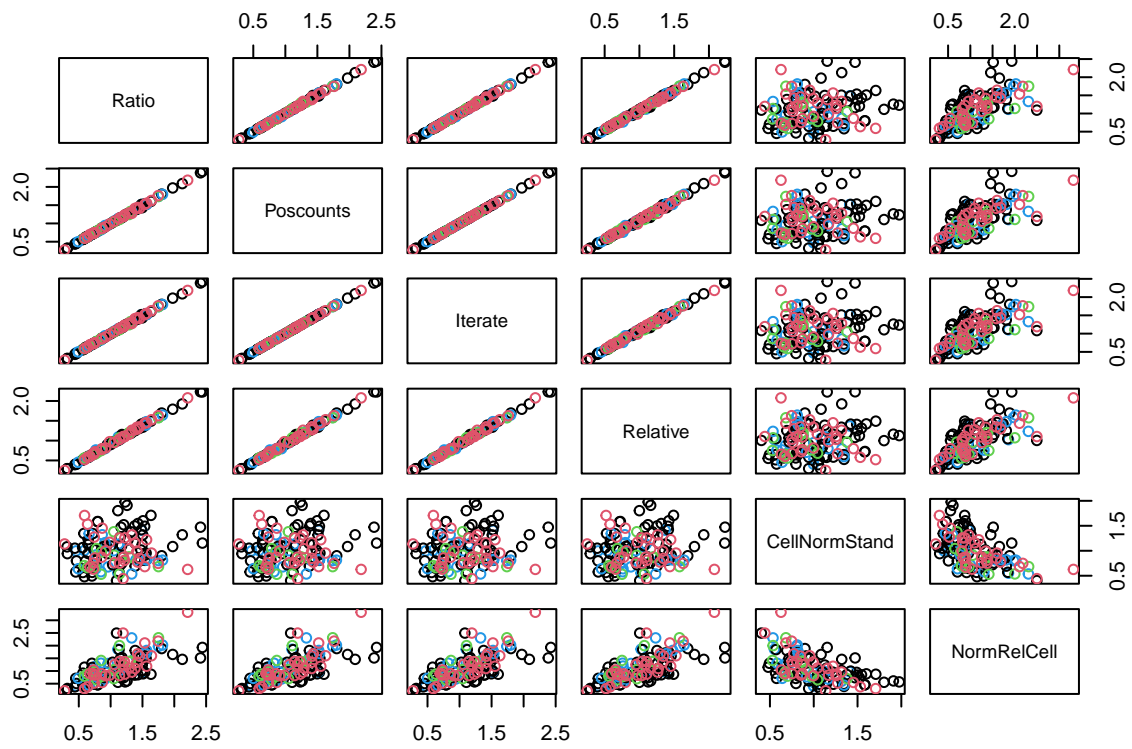

```
pairs(SF3[, c(15,17,19,20)], col=SF3$Diagnosis)
```

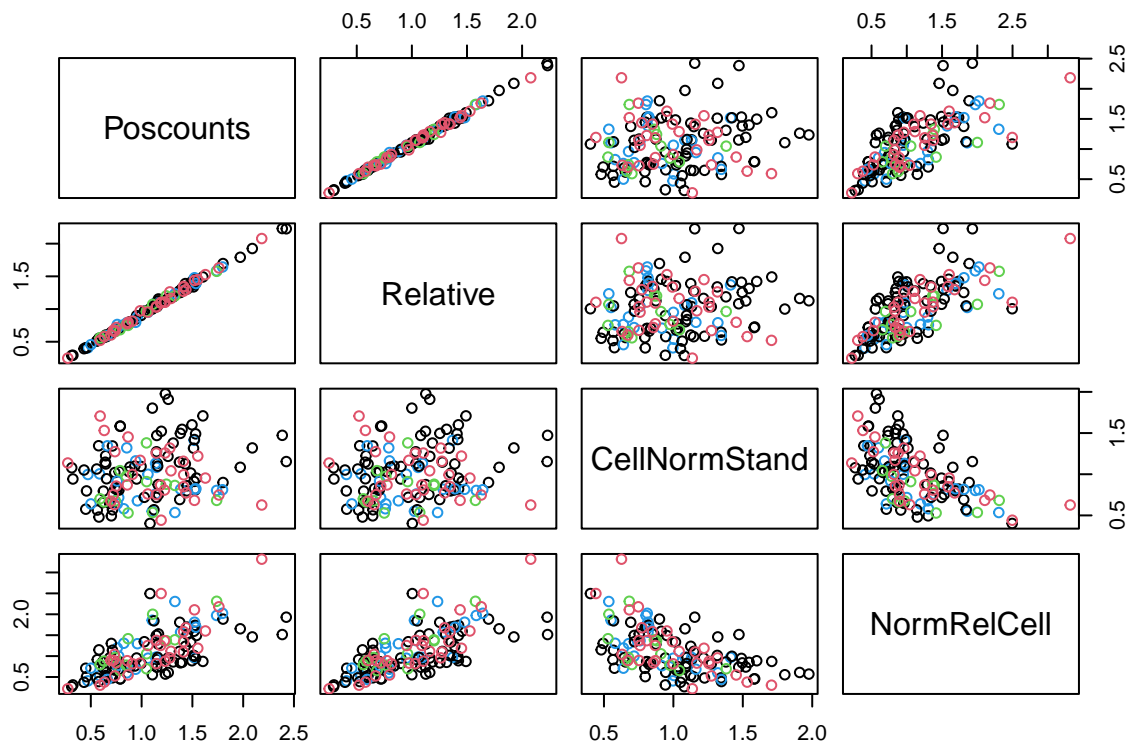

```
#I do want CellNormStand and NormRelCell to be negatively correlated due to DESeq divide
#with sizeFactor. It is also good that CellNormStand seems uncorrelated to the other
#normalization factors.
```

```
##Select size factors calculated above for normalization
dds@colData@listData$sizeFactor <- SF3[,20]
#hist(dds@colData@listData$sizeFactor)
#colnames(SF3[13])
normname<-colnames(SF3[20])

##See vignette for note on factor levels
#Filtering of the Counttable. Bare minimum is performed later. Also to reduce memory of
#the dds
dds2 <- dds[ rowSums(counts(dds))>50*length(Taxonomy2),] #Previously 0 instead of 1

#Estimate dispersions and fit the GLM
#dds2 <- DESeq(dds2, test="LRT", reduced = ~Metformin)
dds2 <- DESeq(dds2, test="LRT", reduced = ~1)

res<-results(dds2)
summary(res)
```

```
##
## out of 196 with nonzero total read count
```

```
## adjusted p-value < 0.1
## LFC > 0 (up)      : 79, 40%
## LFC < 0 (down)   : 1, 0.51%
## outliers [1]     : 0, 0%
## low counts [2]   : 42, 21%
## (mean count < 3775)
## [1] see 'cooksCutoff' argument of ?results
## [2] see 'independentFiltering' argument of ?results
```

```
resultsNames(dds2)
```

```
## [1] "Intercept"          "Diagnosis_T1D_vs_Control"
## [3] "Diagnosis_LADA_vs_Control" "Diagnosis_T2D_vs_Control"
## [5] "BMIq"
```

```
##MA plots from inbuilt DESeq function
plotMA(dds2, alpha=0.1)
```

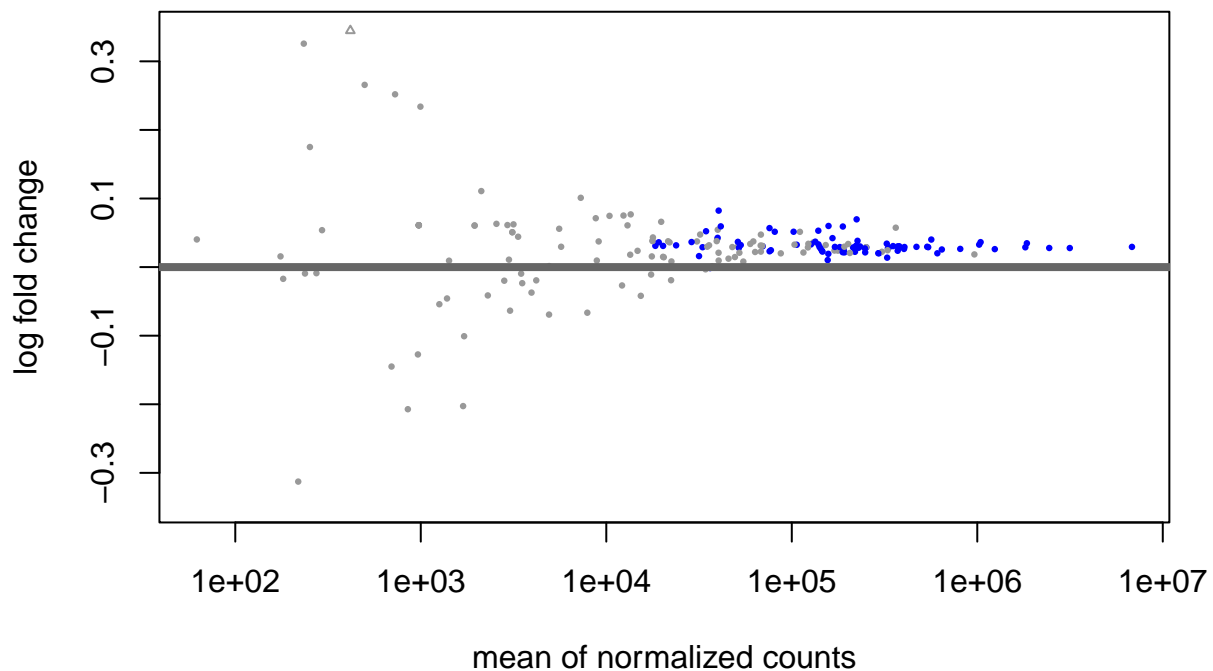

```
plotMA(res, ylim=c(-2,2))
```

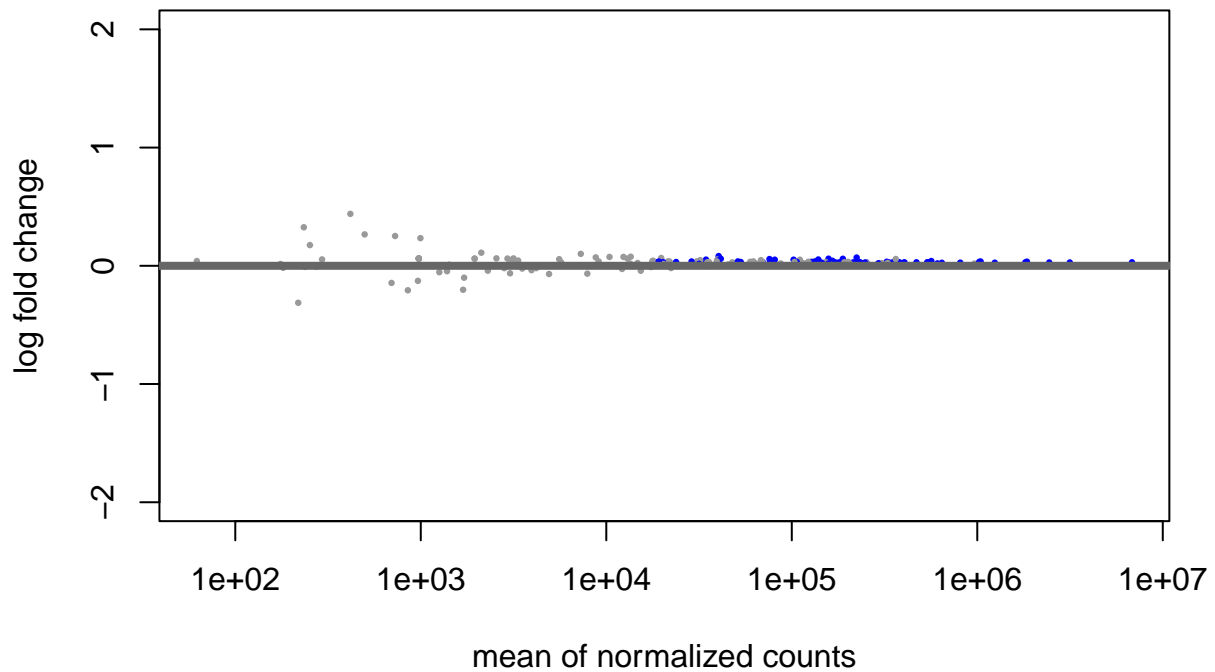

```

#Unshrunken/shrunken
#res<-results(dds2, addMLE=TRUE)
#resLFC <- DESeq2::lfcShrink(dds2, coef=2)
#resLFC
#DESeq2::plotMA(resLFC, ylim=c(-2,2))

#Make histogram
#pdf(paste("HistogramDESeq_Func", ".pdf", sep=""), height=6, width=12)
hist(res$pvalue[res$baseMean > 1], breaks = 0:20/20,
      col = "grey50", border = "white")

```

### Histogram of res\$pvalue[res\$baseMean > 1]

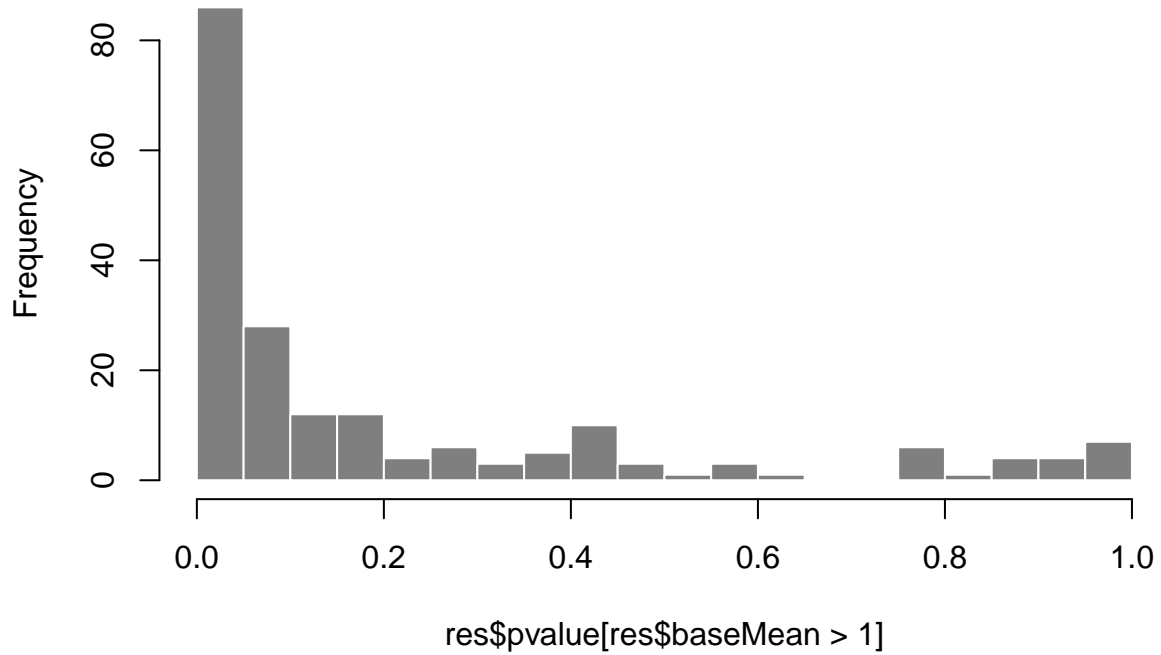

```
#dev.off()
```

```
#Show dispersion plot with shrinkage
```

```
#pdf(paste("DispersionplotDESeq_Func", ".pdf", sep=""), height=9, width=12)
```

```
plotDispEsts(dds2)
```

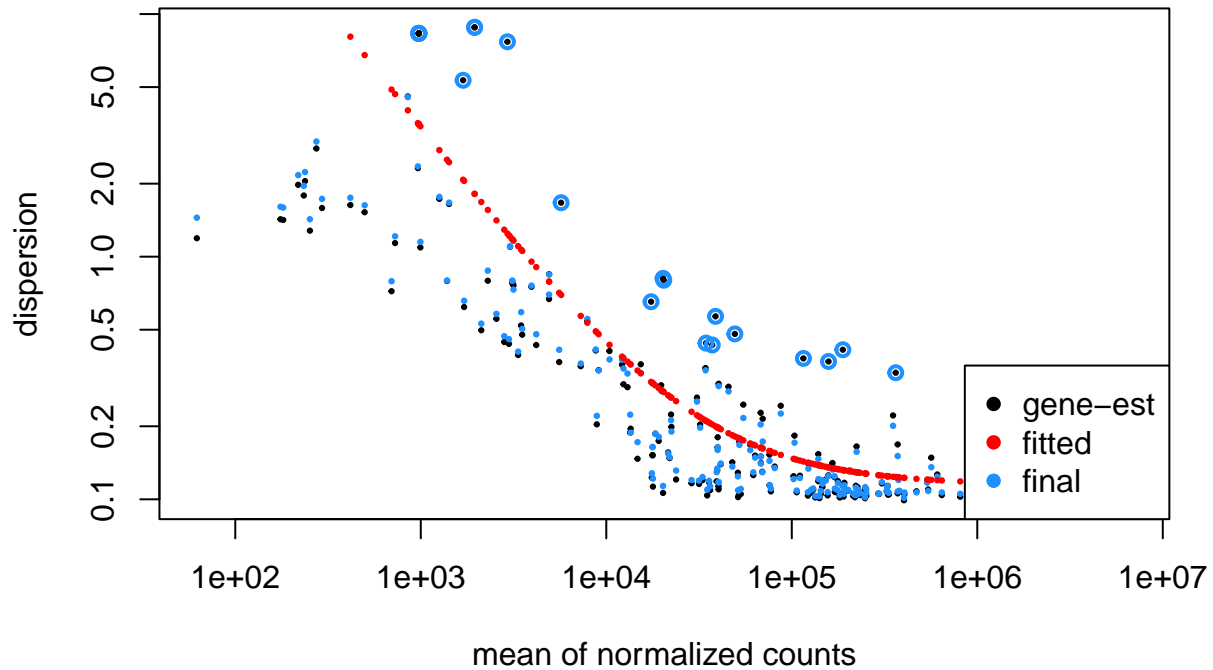

```

#dev.off()

##Plot PCA
#dds2_rlog<-rlogTransformation(dds2)
##pdf(paste("PCADESeq_Func", ".pdf", sep=""), height=9, width=9)
#plotPCA(dds2_rlog, intgroup=c("Diagnosis"))+coord_fixed()
##dev.off()

#Data structuring
resSig=subset(res, pvalue<0.05) #Could also have selected other value or padj
df <- data.frame(res)
dfSig <- data.frame(resSig)

#Save table.
write.table(dfSig, file="DESeq_SigLRTRemMet_Func.txt", sep="\t", dec=",", row.names = T)
print("Significant LRT")

```

```
## [1] "Significant LRT"
```

```
kable(dfSig)
```

|                                         | baseMean    | log2FoldChange | lfcSE     | stat     | pvalue    | padj      |
|-----------------------------------------|-------------|----------------|-----------|----------|-----------|-----------|
| Cell cycle - Caulobacter [PATH:ko04112] | 156155.0223 | 3.0102294      | 0.0390383 | 3.743665 | 0.0449742 | 0.0980163 |



|                                                                    | baseMean     | log2FoldChange | lfcSE     | stat      | pvalue    | padj      |
|--------------------------------------------------------------------|--------------|----------------|-----------|-----------|-----------|-----------|
| Necroptosis [PATH:ko04217]                                         | 75913.7098   | 0.0230857      | 0.0403843 | 12.761703 | 0.0125008 | 0.0716421 |
| Bacterial chemotaxis [PATH:ko02030]                                | 157791.6914  | 0.0599794      | 0.0725526 | 15.635683 | 0.0035491 | 0.0716421 |
| Flagellar assembly [PATH:ko02040]                                  | 188508.8904  | 0.0591581      | 0.0767095 | 14.741204 | 0.0052692 | 0.0716421 |
| Biofilm formation - Escherichia coli [PATH:ko02026]                | 139018.7817  | 0.0530369      | 0.0457021 | 14.803896 | 0.0051257 | 0.0716421 |
| Biofilm formation - Pseudomonas aeruginosa [PATH:ko02025]          | 75850.0002   | 0.0568518      | 0.0452705 | 13.761869 | 0.0080952 | 0.0716421 |
| Quorum sensing [PATH:ko02024]                                      | 609155.5539  | 0.0201238      | 0.0419884 | 10.571415 | 0.0318274 | 0.0980163 |
| ABC transporters [PATH:ko02010]                                    | 1042044.9923 | 0.0363906      | 0.0404626 | 13.371063 | 0.0095981 | 0.0716421 |
| Phosphotransferase system (PTS) [PATH:ko02060]                     | 351515.7936  | 0.0306307      | 0.0534649 | 10.672218 | 0.0305056 | 0.0958748 |
| AMPK signaling pathway [PATH:ko04152]                              | 18387.7027   | 0.0309781      | 0.0515289 | 9.505000  | 0.0496446 | 0.0980163 |
| Phosphatidylinositol signaling system [PATH:ko04070]               | 33035.9265   | 0.0289692      | 0.0419434 | 10.198823 | 0.0372085 | 0.0980163 |
| Two-component system [PATH:ko02020]                                | 565135.9901  | 0.0401506      | 0.0439341 | 15.208515 | 0.0042877 | 0.0716421 |
| Protein export [PATH:ko03060]                                      | 219109.5944  | 0.0223135      | 0.0384591 | 11.315310 | 0.0232398 | 0.0872911 |
| RNA degradation [PATH:ko03018]                                     | 192358.4294  | 0.0214721      | 0.0395289 | 11.569535 | 0.0483379 | 0.0980163 |
| Sulfur relay system [PATH:ko04122]                                 | 102284.1173  | 0.0515231      | 0.0415281 | 14.386724 | 0.0061578 | 0.0716421 |
| Base excision repair [PATH:ko03410]                                | 143343.1025  | 0.0268067      | 0.0392458 | 10.069562 | 0.0392721 | 0.0980163 |
| DNA replication [PATH:ko03030]                                     | 248750.5462  | 0.0214473      | 0.0399714 | 10.991782 | 0.0405663 | 0.0980163 |
| Homologous recombination [PATH:ko03440]                            | 326813.5597  | 0.0137626      | 0.0400694 | 11.112314 | 0.0253303 | 0.0911045 |
| Mismatch repair [PATH:ko03430]                                     | 295711.6414  | 0.0202449      | 0.0387539 | 12.625659 | 0.0132574 | 0.0716421 |
| Nucleotide excision repair [PATH:ko03420]                          | 146391.9670  | 0.0225549      | 0.0406171 | 10.715397 | 0.0299558 | 0.0958748 |
| RNA polymerase [PATH:ko03020]                                      | 69732.4972   | 0.0303577      | 0.0496302 | 11.102278 | 0.0254383 | 0.0911045 |
| Aminoacyl-tRNA biosynthesis [PATH:ko00970]                         | 1242724.7973 | 0.0261808      | 0.0393309 | 11.334319 | 0.0230529 | 0.0872911 |
| Ribosome biogenesis in eukaryotes [PATH:ko03008]                   | 34492.8040   | 0.0522575      | 0.0791854 | 12.447430 | 0.0143165 | 0.0716421 |
| RNA transport [PATH:ko03013]                                       | 40338.5823   | 0.0823277      | 0.0645627 | 12.512931 | 0.0139180 | 0.0716421 |
| Alanine, aspartate and glutamate metabolism [PATH:ko00250]         | 372509.6882  | 0.0302277      | 0.0391481 | 11.017419 | 0.0375934 | 0.0980163 |
| Arginine biosynthesis [PATH:ko00220]                               | 233417.0192  | 0.0300883      | 0.0388012 | 12.635580 | 0.0132008 | 0.0716421 |
| Cysteine and methionine metabolism [PATH:ko00270]                  | 402736.7400  | 0.0264769      | 0.0380029 | 11.660462 | 0.0200631 | 0.0792235 |
| Glycine, serine and threonine metabolism [PATH:ko00260]            | 329925.6733  | 0.0274425      | 0.0390247 | 10.057557 | 0.0394692 | 0.0980163 |
| Histidine metabolism [PATH:ko00340]                                | 176722.9416  | 0.0254128      | 0.0394197 | 10.408960 | 0.0340744 | 0.0980163 |
| Lysine biosynthesis [PATH:ko00300]                                 | 252348.0759  | 0.0287302      | 0.0388821 | 12.071911 | 0.0168245 | 0.0769422 |
| Phenylalanine, tyrosine and tryptophan biosynthesis [PATH:ko00400] | 333727.4578  | 0.0285433      | 0.0389202 | 13.420080 | 0.0093956 | 0.0716421 |
| Valine, leucine and isoleucine biosynthesis [PATH:ko00290]         | 214043.7487  | 0.0285730      | 0.0387761 | 14.044909 | 0.0071531 | 0.0716421 |
| Betalain biosynthesis [PATH:ko00965]                               | 234.0752     | 0.3257942      | 0.1671929 | 18.420445 | 0.0010211 | NA        |
| Carbapenem biosynthesis [PATH:ko00332]                             | 31621.9628   | 0.0160440      | 0.0412298 | 12.430464 | 0.0144215 | 0.0716421 |
| Flavone and flavonol biosynthesis [PATH:ko00944]                   | 1712.2201    | -              | 0.0968405 | 9.893287  | 0.0422641 | NA        |
| Glucosinolate biosynthesis [PATH:ko00966]                          | 20233.1183   | 0.0308950      | 0.0402006 | 13.874131 | 0.0077078 | 0.0716421 |
| Monobactam biosynthesis [PATH:ko00261]                             | 106341.5172  | 0.0325544      | 0.0393192 | 12.105928 | 0.0165807 | 0.0769422 |
| Novobiocin biosynthesis [PATH:ko00401]                             | 51850.3070   | 0.0279951      | 0.0393229 | 10.838846 | 0.0432316 | 0.0980163 |
| Phenazine biosynthesis [PATH:ko00405]                              | 28826.6477   | 0.0365387      | 0.0413389 | 14.155665 | 0.0068145 | 0.0716421 |
| Streptomycin biosynthesis [PATH:ko00521]                           | 139233.4459  | 0.0331009      | 0.0415286 | 10.127737 | 0.0383301 | 0.0980163 |
| Amino sugar and nucleotide sugar metabolism [PATH:ko00520]         | 543686.3387  | 0.0290336      | 0.0392484 | 16.12601  | 0.0474843 | 0.0980163 |

|                                                                              | baseMean    | log2FoldChange | lfcSE     | stat     | pvalue    | padj      |
|------------------------------------------------------------------------------|-------------|----------------|-----------|----------|-----------|-----------|
| C5-Branched dibasic acid metabolism<br>[PATH:ko00660]                        | 126907.2600 | 0.0330652      | 0.0394487 | 2.57235  | 0.0135650 | 0.0716421 |
| Fructose and mannose metabolism<br>[PATH:ko00051]                            | 372388.2680 | 0.0237951      | 0.0463177 | 0.294160 | 0.0357537 | 0.0980163 |
| Galactose metabolism [PATH:ko00052]                                          | 375800.7897 | 0.0271139      | 0.0413407 | 0.974816 | 0.040854  | 0.0980163 |
| Glycolysis / Gluconeogenesis [PATH:ko00010]                                  | 470076.0858 | 0.0295308      | 0.0389931 | 1.669156 | 0.0199888 | 0.0792235 |
| Pentose phosphate pathway [PATH:ko00030]                                     | 325138.2598 | 0.0341630      | 0.0392972 | 2.796910 | 0.0123120 | 0.0716421 |
| Propanoate metabolism [PATH:ko00640]                                         | 229437.8083 | 0.0282093      | 0.0393520 | 0.679454 | 0.0461876 | 0.0980163 |
| Starch and sucrose metabolism<br>[PATH:ko00500]                              | 536904.8335 | 0.0296438      | 0.0408857 | 2.445962 | 0.0143255 | 0.0716421 |
| Carbon fixation in photosynthetic organisms<br>[PATH:ko00710]                | 221545.5958 | 0.0308479      | 0.0398933 | 3.018823 | 0.0111842 | 0.0716421 |
| Nitrogen metabolism [PATH:ko00910]                                           | 133882.2838 | 0.0370665      | 0.0383328 | 0.913645 | 0.0275510 | 0.0922388 |
| Photosynthesis [PATH:ko00195]                                                | 157444.2960 | 0.0193221      | 0.0421436 | 5.760283 | 0.0033583 | 0.0716421 |
| Sulfur metabolism [PATH:ko00920]                                             | 165767.9102 | 0.0422248      | 0.0434381 | 1.906316 | 0.0180617 | 0.0792235 |
| Glycosphingolipid biosynthesis - lacto and<br>neolacto series [PATH:ko00601] | 218.4148    | -              | 0.1760432 | 3.790826 | 0.0000880 | NA        |
| Peptidoglycan biosynthesis [PATH:ko00550]                                    | 292604.4220 | 0.0202084      | 0.0387679 | 3.000352 | 0.011274  | 0.0716421 |
| alpha-Linolenic acid metabolism<br>[PATH:ko00592]                            | 726.8127    | 0.2519042      | 0.1315092 | 3.602550 | 0.0000959 | NA        |
| Ether lipid metabolism [PATH:ko00565]                                        | 252.5127    | 0.1750544      | 0.1427422 | 0.730118 | 0.0003582 | NA        |
| Glycerolipid metabolism [PATH:ko00561]                                       | 145328.6060 | 0.0240442      | 0.0413365 | 4.561904 | 0.0057017 | 0.0716421 |
| Glycerophospholipid metabolism<br>[PATH:ko00564]                             | 226187.9392 | 0.0383040      | 0.0395252 | 3.768433 | 0.0080720 | 0.0716421 |
| Linoleic acid metabolism [PATH:ko00591]                                      | 417.1435    | 0.4393820      | 0.1579402 | 2.857223 | 0.0000095 | NA        |
| Nicotinate and nicotinamide metabolism<br>[PATH:ko00760]                     | 170759.3562 | 0.0294414      | 0.0396939 | 3.938247 | 0.0414808 | 0.0980163 |
| One carbon pool by folate [PATH:ko00670]                                     | 188159.1347 | 0.0216635      | 0.0402431 | 0.969075 | 0.0269138 | 0.0921049 |
| Pantothenate and CoA biosynthesis<br>[PATH:ko00770]                          | 247957.9855 | 0.0272438      | 0.0381104 | 3.915977 | 0.007568  | 0.0716421 |
| Porphyrin and chlorophyll metabolism<br>[PATH:ko00860]                       | 223648.1833 | 0.0696239      | 0.0472561 | 0.527985 | 0.0491754 | 0.0980163 |
| Thiamine metabolism [PATH:ko00730]                                           | 224290.1230 | 0.0316751      | 0.0385939 | 4.485060 | 0.0058975 | 0.0716421 |
| Vitamin B6 metabolism [PATH:ko00750]                                         | 77161.2179  | 0.0245918      | 0.0396800 | 0.837047 | 0.0432630 | 0.0980163 |
| beta-Alanine metabolism [PATH:ko00410]                                       | 51220.4380  | 0.0367816      | 0.0420660 | 0.987803 | 0.0406336 | 0.0980163 |
| D-Alanine metabolism [PATH:ko00473]                                          | 36295.1835  | -              | 0.0401163 | 0.549670 | 0.0487366 | 0.0980163 |
|                                                                              |             | 0.0014071      |           |          |           |           |
| D-Glutamine and D-glutamate metabolism<br>[PATH:ko00471]                     | 53072.2312  | 0.0321141      | 0.0396355 | 0.776386 | 0.0443677 | 0.0980163 |
| Selenocompound metabolism [PATH:ko00450]                                     | 141097.1800 | 0.0293988      | 0.0382624 | 2.763053 | 0.0124935 | 0.0716421 |
| Biosynthesis of ansamycins [PATH:ko01051]                                    | 39830.4805  | 0.0426722      | 0.0476885 | 5.95646  | 0.003078  | 0.0716421 |
| Geraniol degradation [PATH:ko00281]                                          | 995.3726    | 0.2339052      | 0.1280344 | 3.424733 | 0.0001041 | NA        |
| Polyketide sugar unit biosynthesis<br>[PATH:ko00523]                         | 80950.4860  | 0.0515218      | 0.0437570 | 0.661384 | 0.0465347 | 0.0980163 |
| Terpenoid backbone biosynthesis<br>[PATH:ko00900]                            | 181462.8427 | 0.0291771      | 0.0385264 | 2.049460 | 0.0169872 | 0.0769422 |
| Purine metabolism [PATH:ko00230]                                             | 809598.0466 | 0.0265205      | 0.0387243 | 0.329582 | 0.0352272 | 0.0980163 |
| Pyrimidine metabolism [PATH:ko00240]                                         | 644062.4895 | 0.0256654      | 0.0389685 | 0.115657 | 0.0385230 | 0.0980163 |
| Aminobenzoate degradation [PATH:ko00627]                                     | 19177.7585  | 0.0361688      | 0.0507485 | 0.796643 | 0.043996  | 0.0980163 |
| Benzoate degradation [PATH:ko00362]                                          | 41420.4099  | 0.0594041      | 0.0447097 | 0.650295 | 0.0467490 | 0.0980163 |
| Chloroalkane and chloroalkene degradation<br>[PATH:ko00625]                  | 23793.3043  | 0.0317244      | 0.0432505 | 0.910533 | 0.0419620 | 0.0980163 |

|                                              | baseMean     | log2FoldChange | lfcSE     | stat      | pvalue    | padj      |
|----------------------------------------------|--------------|----------------|-----------|-----------|-----------|-----------|
| Ethylbenzene degradation [PATH:ko00642]      | 498.1493     | 0.2656974      | 0.1523683 | 18.656069 | 0.0009181 | NA        |
| 2-Oxocarboxylic acid metabolism              | 404909.1603  | 0.0293035      | 0.0389662 | 3.573739  | 0.0087875 | 0.0716421 |
| Biosynthesis of amino acids                  | 1815934.8143 | 0.0288538      | 0.0384808 | 3.463480  | 0.0092198 | 0.0716421 |
| Biosynthesis of antibiotics                  | 2443269.7600 | 0.0278728      | 0.0383875 | 1.749795  | 0.0193122 | 0.0792235 |
| Biosynthesis of secondary metabolites        | 3152810.7079 | 0.0277881      | 0.0380911 | 1.777829  | 0.0190822 | 0.0792235 |
| Carbon metabolism                            | 1023857.9733 | 0.0327533      | 0.0400323 | 3.774653  | 0.0443996 | 0.0980163 |
| Metabolic pathways                           | 6821207.1504 | 0.0294363      | 0.0382936 | 10.692735 | 0.0302432 | 0.0958748 |
| Microbial metabolism in diverse environments | 1850407.2352 | 0.0347478      | 0.0393555 | 11.025602 | 0.0262778 | 0.0919722 |

## DESeq Wald

All pairwise Differential abundance analysis comparison (DESeq and visualized venn)

```
rm(list=setdiff(ls(), c("Metadata", "MetadataMed", "Feature", "TaxonomyDA", "Taxonomy", "Fig2List")))

#Reassign names
Metadata2<-Metadata
#Order Diagnosis
Metadata2$Diagnosis<-ordered(Metadata2$Diagnosis,
                             levels=c("Control", "T1D", "T2D", "LADA"))
#Included filtering
Taxonomy2<-TaxonomyDA
#Taxonomy2<-Taxonomy[length(Taxonomy)-rowSums(Taxonomy == 0) >= 30,]

#The factor can not be ordered for DESeq to run
Metadata2$Diagnosis<-factor(Metadata2$Diagnosis, ordered=FALSE)

#Create design formula
#design <- formula(paste("~ ", "Diagnosis"))
design <- formula(paste("~ ", "Diagnosis", "+", "BMIq"))
#design <- formula(paste("~ ", "Diagnosis", "+ Metformin"))
#Create DESeq2 object with matrix and metadata
dds <- DESeqDataSetFromMatrix(countData = Taxonomy2,
                              colData = Metadata2,
                              design = design)

##Assess and calculate size factors using the different methods
SF<-data.frame(Ratio=sizeFactors(estimateSizeFactors(dds, type="ratio")),
              Poscounts=sizeFactors(estimateSizeFactors(dds, type="poscounts")),
              #iterate takes a lot of time changed to "poscounts" but kept due to the
              #following code
              Iterate=sizeFactors(estimateSizeFactors(dds, type="poscounts")),
              Relative=colSums(Taxonomy2)/mean(colSums(Taxonomy2))
              )
SF<-add_rownames(SF, var="MicrobiomeID")
#Adding total abundances
# old path path<-paste("Q:/",
#                       "Projects/",
#                       "LADA/",
```

```

# "LADA_Sandra_Evelina/",
# "LADA_JKV/",
# "LADA_R_AfterFlow_Analysis_FinalCounts/",
# "LADA_FinalCounts/",
# "2019-09-03_CountAnalysis.rds", sep="")

path <- paste("J:/",
             "CBMR/",
             "SUN-CBMR-Hansen-Group/",
             "Projects/",
             "LADA/",
             "LADA_Sandra_Evelina/",
             "LADA_JKV/",
             "LADA_R_AfterFlow_Analysis_FinalCounts/",
             "LADA_FinalCounts/",
             "2019-09-03_CountAnalysis.rds", sep="")

TotalCounts<-readRDS(path)
TotalCountsProcess <-
  data.frame(MicrobiomeID=TotalCounts$DF_Save_w$ID,
             CellNorm=TotalCounts$DF_Save_w$Cells_per_g_feces_FR_corrected_mean)
TotalCountsProcess$MicrobiomeID <- paste("L", TotalCountsProcess$MicrobiomeID,
                                         sep="")
SF2<-merge(SF, TotalCountsProcess, by="MicrobiomeID")

#One value is NaN in sample 602059 assigns value as average
SF2$CellNorm[is.nan(SF2$CellNorm)]<-mean(na.omit(SF2$CellNorm))

SF2$CellNormStand<-SF2$CellNorm/mean(SF2$CellNorm) #Watch out for NaN values can assign
#average, but wants the error

SF3<-merge(Metadata2, SF2, by="MicrobiomeID")
#DESeq divides with sizeFactor (High cell count should have low sizeFactor providing
#larger counts in a sample)
#Still have to consider seq data is relative
SF3$NormRelCell<-SF3$Relative/SF3$CellNormStand
#Overview of normalization factors
aggregate(SF3[, 14:20], list(SF3$Diagnosis), mean) #Have to run heatmap chunk adding sex

```

```

Group.1 Ratio Poscounts Iterate Relative CellNorm CellNormStand 1 Control 1.070161 1.059005 1.059005
0.9884311 20384275367 1.0420944 2 T1D 1.105743 1.096874 1.096874 1.0263342 18731782275 0.9576149 3
T2D 1.087719 1.081155 1.081155 1.0016117 19624620327 1.0032590 4 LADA 1.093748 1.089036 1.089036
0.9984496 18940404238 0.9682802 NormRelCell 1 1.016138 2 1.210062 3 1.139338 4 1.092808

```

```

#to metadata
aggregate(SF3[, 14:20], list(SF3$Diagnosis), sd)

```

```

Group.1 Ratio Poscounts Iterate Relative CellNorm CellNormStand 1 Control 0.4597056 0.4523032
0.4523032 0.4273249 6781846681 0.3467047 2 T1D 0.4010043 0.3962703 0.3962703 0.3829215 5712095609
0.2920164 3 T2D 0.3344981 0.3296724 0.3296724 0.3105289 6146706989 0.3142348 4 LADA 0.4434083
0.4388107 0.4388107 0.4058688 5544046390 0.2834253 NormRelCell 1 0.4752640 2 0.6768389 3 0.6643237 4
0.4609629

```

```
pairs(SF3[, c(14:17,19,20)], col=SF3$Diagnosis)
```

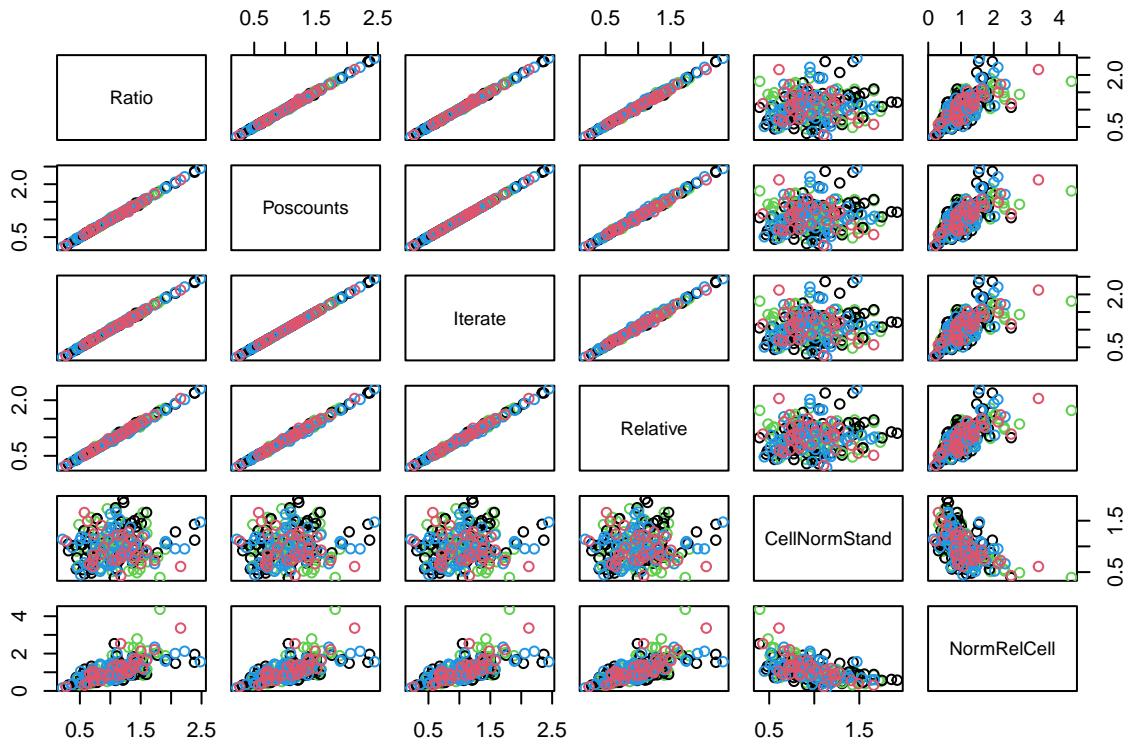

```
pairs(SF3[, c(15,17,19,20)], col=SF3$Diagnosis)
```

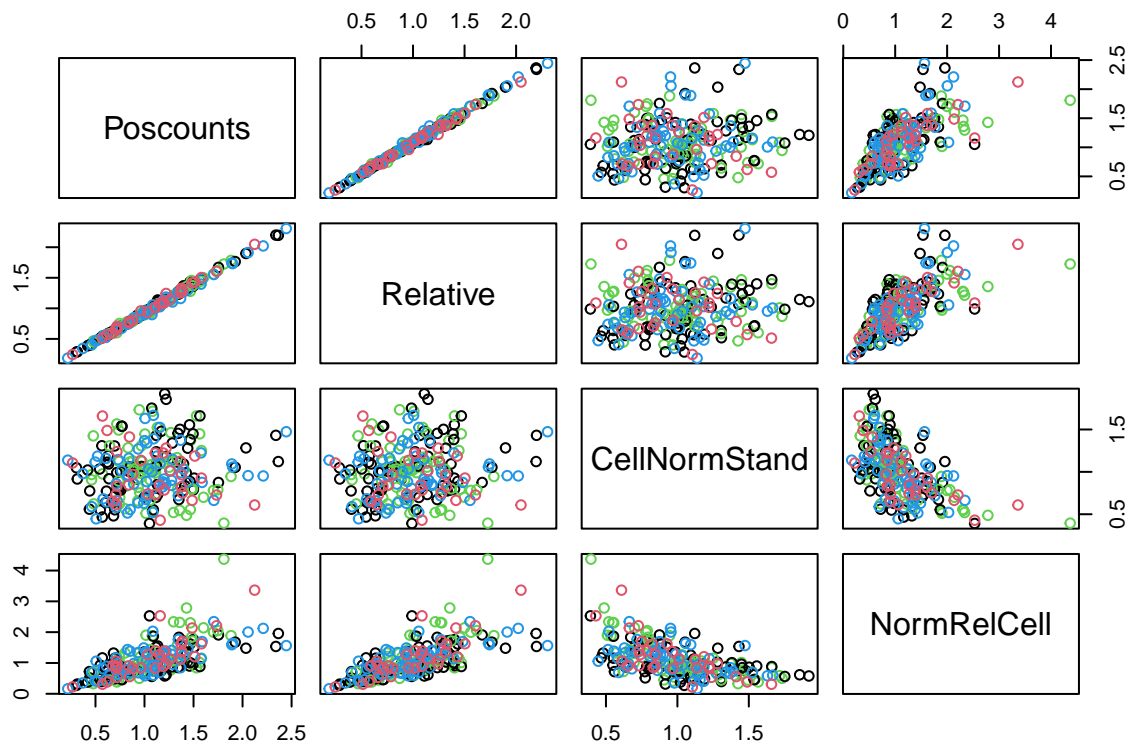

```

#I do want CellNormStand and NormRelCell to be negatively correlated due to DESeq divide
#with sizeFactor.
#It is also good that CellNormStand seems uncorrelated to the other normalization factors.

##Select size factors calculated above for normalization
dds@colData@listData$sizeFactor <- SF3[,20]

##See vignette for note on factor levels
#Filtering of the Counttable. Bare minimum is performed later. Also to reduce memory of
#the dds
dds <- dds[ rowSums(counts(dds))>(50*length(Taxonomy2)),] #Previously 0 instead of 1

#Estimate dispersions and fit the GLM
dds <- DESeq(dds)

res<-results(dds)
summary(res)

```

out of 197 with nonzero total read count adjusted p-value < 0.1 LFC > 0 (up) : 0, 0% LFC < 0 (down) : 0, 0% outliers [1] : 0, 0% low counts [2] : 0, 0% (mean count < 64) [1] see 'cooksCutoff' argument of ?results [2] see 'independentFiltering' argument of ?results

```
resultsNames(dds)
```

```
[1] "Intercept" "Diagnosis_T1D_vs_Control" [3] "Diagnosis_T2D_vs_Control" "Diagnosis_LADA_vs_Control"  
[5] "BMIq"
```

```
#Threshold for FDR-adjusted p-values  
padj_threshold <- 0.1  
  
if (is.factor(colData(dds)[,"Diagnosis"]) == TRUE) {  
  
  #Find all two-wise combinations of levels in chosen test factor  
  test <- combn(levels(colData(dds)[,"Diagnosis"]), 2)  
  test[,3]<-c("LADA", "Control") #Want LADA first  
  test[,5]<-c("LADA", "T1D") #Want LADA first  
  test[,6]<-c("LADA", "T2D") #Want LADA first  
  foo = test[1,]  
  poo = test[2,]  
  
  #Do DESeq2 analysis on all combinations of levels and save as list  
  result <- vector("list",length(foo))  
  for (i in 1:length(foo)) {  
    for (j in 1:length(poo)) {  
      result[i] = results(dds, contrast = c("Diagnosis" ,foo[i], poo[j]))  
    }  
  }  
  
  #Produce output tables with significant taxa from each comparison  
  res_list <- vector("list",length(foo))  
  for (i in 1:length(result)) {  
    res_stat <- data.frame(result[i])  
    res_stat <- res_stat[is.na(res_stat$pvalue) == FALSE,]  
    stat_sig <- na.omit(res_stat[res_stat$padj < padj_threshold,])  
    res_stat$gene <- rownames(res_stat)  
    res_stat$g1 <- test[1,i]  
    res_stat$g2 <- test[2,i]  
    res_stat$compare <- paste(test[1,i], "vs", test[2,i])  
    res_list[i] <- list(res_stat)  
  }  
  
  res_stat <- do.call('rbind', res_list)  
  rownames(res_stat) <- 1:nrow(res_stat)  
  res_stat <- res_stat[with(res_stat, order(padj, pvalue, abs(log2FoldChange))),]  
  stat_sig <- na.omit(res_stat[res_stat$padj < padj_threshold,])  
}  
  
if (is.numeric(colData(dds)[,"Diagnosis"]) == TRUE) {  
  
  res_stat <- data.frame((results(dds)))  
  res_stat$maxCooks <- apply(assays(dds)[["cooks"]], 1, max)  
  res_stat <- res_stat[is.na(res_stat$pvalue) == FALSE,]  
  res_stat <- res_stat[with(res_stat, order(padj, pvalue, abs(log2FoldChange))), ]  
  res_stat$gene <- rownames(res_stat)  
  max_cooks <- quantile(na.omit(res_stat$maxCooks), cooks_quantile_cutoff)  
  stat_sig <-  
    na.omit(res_stat[res_stat$padj < padj_threshold & res_stat$maxCooks < max_cooks,])  
}
```

```

#All comparisons
write.table(res_stat, file="DESeqRes_Orgs_Func.txt", quote = F, row.names = F, sep="\t")

#Significant taxa in table
if (nrow(stat_sig) > 0) {
kable(stat_sig, row.names = F)
write.table(stat_sig, file="DESeqRes_SigOrgs_Func.txt", quote = F, row.names = F, sep="\t")
} else {
  print("No significant taxa were found.")
}
print("Significant Wald")

```

[1] "Significant Wald"

```
kable(stat_sig)
```

|     | baseMean   | log2FoldChange | lfcSE     | negLog10Pvalue | negLog10Padj | gene                                              | g1      | g2      | compare               |
|-----|------------|----------------|-----------|----------------|--------------|---------------------------------------------------|---------|---------|-----------------------|
| 523 | 1047.1281  | 2.4393983      | 0.354746  | 579.000000     | 0.000000     | linoleic acid metabolism<br>[PATH:ko00591]        | LADA    | Control | LADA<br>vs<br>Control |
| 555 | 2086.5461  | 2.324053       | 0.304196  | 635.2530       | 0.000000     | geraniol degradation<br>[PATH:ko00281]            | LADA    | Control | LADA<br>vs<br>Control |
| 515 | 1471.3897  | 1.9402023      | 0.305536  | 603.50139      | 0.000000     | alpha-Linolenic acid metabolism<br>[PATH:ko00592] | LADA    | Control | LADA<br>vs<br>Control |
| 321 | 495.64764  | -              | 0.3162538 | -              | 0.000000     | other lipid metabolism<br>[PATH:ko00565]          | Control | T2D     | Control<br>vs<br>T2D  |
| 326 | 1047.12814 | -              | 0.3587623 | -              | 0.000000     | linoleic acid metabolism<br>[PATH:ko00591]        | Control | T2D     | Control<br>vs<br>T2D  |
| 318 | 1471.38976 | -              | 0.3089962 | -              | 0.000000     | alpha-Linolenic acid metabolism<br>[PATH:ko00592] | Control | T2D     | Control<br>vs<br>T2D  |
| 358 | 2086.54612 | -              | 0.3076410 | -              | 0.000000     | geraniol degradation<br>[PATH:ko00281]            | Control | T2D     | Control<br>vs<br>T2D  |
| 518 | 495.64764  | 1.8501672      | 0.3127254 | 162.67         | 0.000000     | other lipid metabolism<br>[PATH:ko00565]          | LADA    | Control | LADA<br>vs<br>Control |
| 580 | 569.52117  | 1.1868309      | 0.371423  | 588.7702       | 0.000000     | toluene degradation<br>[PATH:ko00623]             | LADA    | Control | LADA<br>vs<br>Control |



|     | baseMean   | log2FoldChange | lfcSE     | stat    | pvalue   | padj     | gene                                                              | g1      | g2      | compare               |
|-----|------------|----------------|-----------|---------|----------|----------|-------------------------------------------------------------------|---------|---------|-----------------------|
| 574 | 1015.07229 | 2.9352606      | 0.3372657 | 738072  | 0.000000 | 0.000000 | Ethylbenzene degradation<br>[PATH:ko00642]                        | LADAC   | Control | LADA<br>vs<br>Control |
| 859 | 524.40214  | 2.6950453      | 0.4570655 | 5896460 | 0.000000 | 0.000000 | Betalain biosynthesis<br>[PATH:ko00965]                           | LADAT1D | T1D     | LADA<br>vs<br>T1D     |
| 917 | 1047.12814 | 2.5390140      | 0.4473633 | 375520  | 0.000000 | 0.000000 | Linoleic acid metabolism<br>[PATH:ko00591]                        | LADAT1D | T1D     | LADA<br>vs<br>T1D     |
| 662 | 524.40214  | -              | 0.4598840 | -       | 0.000000 | 0.000000 | Betalain biosynthesis<br>[PATH:ko00965]                           | T1D     | T2D     | T1D<br>vs<br>T2D      |
| 377 | 1015.07229 | -              | 0.3410848 | -       | 0.000000 | 0.000000 | Ethylbenzene degradation<br>[PATH:ko00642]                        | Control | T2D     | Control<br>vs<br>T2D  |
| 383 | 569.52117  | -              | 0.3756481 | -       | 0.000000 | 0.000000 | Toluene degradation<br>[PATH:ko00623]                             | Control | T2D     | Control<br>vs<br>T2D  |
| 720 | 1047.12814 | -              | 0.4501371 | -       | 0.000000 | 0.000000 | Linoleic acid metabolism<br>[PATH:ko00591]                        | T1D     | T2D     | T1D<br>vs<br>T2D      |
| 572 | 5377.28344 | 2.4369416      | 0.2626658 | 89910   | 0.000000 | 0.000000 | Drug metabolism - cytochrome<br>P450 [PATH:ko00982]               | LADAC   | Control | LADA<br>vs<br>Control |
| 576 | 5353.44294 | 2.2685940      | 0.2624795 | 55098   | 0.000000 | 0.000000 | Metabolism of xenobiotics by<br>cytochrome P450<br>[PATH:ko00980] | LADAC   | Control | LADA<br>vs<br>Control |
| 715 | 495.64764  | -              | 0.3968193 | -       | 0.000000 | 0.000000 | Ether lipid metabolism<br>[PATH:ko00565]                          | T1D     | T2D     | T1D<br>vs<br>T2D      |
| 974 | 569.52117  | 2.2889539      | 0.4683840 | 86890   | 0.000000 | 0.000000 | Toluene degradation<br>[PATH:ko00623]                             | LADAT1D | T1D     | LADA<br>vs<br>T1D     |
| 465 | 524.40214  | 2.6799277      | 0.3621520 | 38730   | 0.000000 | 0.000000 | Betalain biosynthesis<br>[PATH:ko00965]                           | LADAC   | Control | LADA<br>vs<br>Control |
| 912 | 495.64764  | 2.8632020      | 0.3943809 | 724370  | 0.000000 | 0.000000 | Ether lipid metabolism<br>[PATH:ko00565]                          | LADAT1D | T1D     | LADA<br>vs<br>T1D     |
| 949 | 2086.54617 | 2.7944439      | 0.3835250 | 678818  | 0.000000 | 0.000000 | Teraniol degradation<br>[PATH:ko00281]                            | LADAT1D | T1D     | LADA<br>vs<br>T1D     |
| 375 | 5377.28344 | -              | 0.2656421 | -       | 0.000000 | 0.000000 | Drug metabolism - cytochrome<br>P450 [PATH:ko00982]               | Control | T2D     | Control<br>vs<br>T2D  |
| 379 | 5353.44294 | -              | 0.2654546 | -       | 0.000000 | 0.000000 | Metabolism of xenobiotics by<br>cytochrome P450<br>[PATH:ko00980] | Control | T2D     | Control<br>vs<br>T2D  |

|     | baseMean   | log2FoldChange | lfcSE     | negLog10Pvalue | padj            | gene                                                                            | g1        | g2   | compare                    |
|-----|------------|----------------|-----------|----------------|-----------------|---------------------------------------------------------------------------------|-----------|------|----------------------------|
| 268 | 524.40214  | -              | 0.3662559 | -              | 0.000010000276  | Betalain biosynthesis<br>[PATH:ko00965]                                         | Contr     | T2D  | Control<br>vs<br>T2D       |
| 909 | 1471.38977 | 0.44940        | 0.38521   | 2.812481       | 0.0000097000316 | Alpha-Linolenic acid metabolism<br>[PATH:ko00592]                               | LADAT1D   | LADA | LADA<br>vs<br>T1D          |
| 777 | 569.52117  | -              | 0.4713141 | -              | 0.0000081000363 | Toluene degradation<br>[PATH:ko00623]                                           | T1D       | T2D  | T1D<br>vs<br>T2D           |
| 752 | 2086.54612 | -              | 0.3859112 | -              | 0.0000092000363 | Geraniol degradation<br>[PATH:ko00281]                                          | T1D       | T2D  | T1D<br>vs<br>T2D           |
| 378 | 550.12354  | -              | 0.4096114 | -              | 0.0000263000517 | Fluorobenzoate degradation<br>[PATH:ko00364]                                    | Contr     | T2D  | Control<br>vs<br>T2D       |
| 900 | 247.27768  | 0.1059149      | 0.491682  | 2.283076       | 0.0000184000518 | Glycosphingolipid biosynthesis -<br>lacto and neolacto series<br>[PATH:ko00601] | LADAT1D   | LADA | LADA<br>vs<br>T1D          |
| 712 | 1471.38976 | -              | 0.3876074 | -              | 0.0000182000597 | Alpha-Linolenic acid metabolism<br>[PATH:ko00592]                               | T1D       | T2D  | T1D<br>vs<br>T2D           |
| 772 | 550.12354  | -              | 0.5139542 | -              | 0.0000379001067 | Fluorobenzoate degradation<br>[PATH:ko00364]                                    | T1D       | T2D  | T1D<br>vs<br>T2D           |
| 554 | 2324.42828 | 0.8695622      | 0.340437  | 2.922942       | 0.0000575001132 | Carotenoid biosynthesis<br>[PATH:ko00906]                                       | LADAContr | LADA | LADA<br>vs<br>Con-<br>trol |
| 575 | 550.12354  | 0.5484008      | 0.405023  | 2.882300       | 0.0001308002361 | Fluorobenzoate degradation<br>[PATH:ko00364]                                    | LADAContr | LADA | LADA<br>vs<br>Con-<br>trol |
| 969 | 550.12354  | 0.9438976      | 0.510773  | 2.950578       | 0.0001404003489 | Fluorobenzoate degradation<br>[PATH:ko00364]                                    | LADAT1D   | LADA | LADA<br>vs<br>T1D          |
| 968 | 1015.07229 | 0.5983085      | 0.425203  | 2.075892       | 0.0001706003735 | Ethylbenzene degradation<br>[PATH:ko00642]                                      | LADAT1D   | LADA | LADA<br>vs<br>T1D          |
| 966 | 5377.28344 | 0.173639       | 0.331153  | 2.867611       | 0.0002368004665 | Drug metabolism - cytochrome<br>P450 [PATH:ko00982]                             | LADAT1D   | LADA | LADA<br>vs<br>T1D          |
| 970 | 5353.44204 | 0.208016       | 0.330923  | 2.065046       | 0.0002608004688 | Metabolism of xenobiotics by<br>cytochrome P450<br>[PATH:ko00980]               | LADAT1D   | LADA | LADA<br>vs<br>T1D          |
| 703 | 247.27768  | -              | 0.4947889 | -              | 0.0003208007924 | Glycosphingolipid biosynthesis -<br>lacto and neolacto series<br>[PATH:ko00601] | T1D       | T2D  | T1D<br>vs<br>T2D           |
| 771 | 1015.07229 | -              | 0.4278472 | -              | 0.0005066011067 | Ethylbenzene degradation<br>[PATH:ko00642]                                      | T1D       | T2D  | T1D<br>vs<br>T2D           |

|     | baseMean     | log2FoldChange | negLog10Pvalue | stat   | pvalue    | padj      | gene                                                              | g1      | g2      | compare               |
|-----|--------------|----------------|----------------|--------|-----------|-----------|-------------------------------------------------------------------|---------|---------|-----------------------|
| 537 | 4324.7722    | 2.5193709      | 0.2148483      | 48270  | 0.0008102 | 0.0133495 | Retinol metabolism<br>[PATH:ko00830]                              | LADA    | Control | LADA<br>vs<br>Control |
| 769 | 5377.28344   | - 0.3332169    | - 0.0012164    | 23962  | 0.0012164 | 0.023962  | Drug metabolism - cytochrome<br>P450 [PATH:ko00982]               | T1D     | T2D     | T1D<br>vs<br>T2D      |
| 773 | 5353.44294   | - 0.3329817    | - 0.0013300    | 23962  | 0.0013300 | 0.023962  | Metabolism of xenobiotics by<br>cytochrome P450<br>[PATH:ko00980] | T1D     | T2D     | T1D<br>vs<br>T2D      |
| 9   | 161375.10238 | 59689          | 0.1847832      | 28566  | 0.0001900 | 0.0359443 | Bacterial chemotaxis<br>[PATH:ko02030]                            | Control | T1D     | Control<br>vs<br>T1D  |
| 10  | 192929.91707 | 2483           | 0.1984291      | 56423  | 0.0003600 | 0.0359443 | Flagellar assembly<br>[PATH:ko02040]                              | Control | T1D     | Control<br>vs<br>T1D  |
| 357 | 2324.42828   | - 0.3442985    | - 0.0020103    | 36168  | 0.0020103 | 0.036168  | Carotenoid biosynthesis<br>[PATH:ko00906]                         | Control | T2D     | Control<br>vs<br>T2D  |
| 604 | 82196.16111  | - 0.1388035    | - 0.0038804    | 63833  | 0.0038804 | 0.063833  | Biofilm formation - Pseudomonas<br>aeruginosa [PATH:ko02025]      | T1D     | T2D     | T1D<br>vs<br>T2D      |
| 600 | 161375.11235 | - 0.1925753    | - 0.0048302    | 73302  | 0.0048302 | 0.073302  | Bacterial chemotaxis<br>[PATH:ko02030]                            | T1D     | T2D     | T1D<br>vs<br>T2D      |
| 842 | 33974.13943  | - 0.2165670    | - 0.0048302    | 79427  | 0.0048302 | 0.079427  | Ribosome biogenesis in<br>eukaryotes [PATH:ko03008]               | LADA    | T1D     | LADA<br>vs<br>T1D     |
| 586 | 1305.30186   | 0.439611       | 0.3829407      | 72612  | 0.0064082 | 0.0903513 | Biosynthesis of terpenoids and<br>steroids                        | LADA    | Control | LADA<br>vs<br>Control |
| 516 | 3111.36013   | 0.3628725      | 0.2065227      | 272547 | 0.0064209 | 0.0903513 | Arachidonic acid metabolism<br>[PATH:ko00590]                     | LADA    | Control | LADA<br>vs<br>Control |
| 402 | 67.03765     | 0.9359374      | 0.3469999      | 97220  | 0.0069900 | 0.0918273 | Wnt signaling pathway<br>[PATH:ko04115]                           | LADA    | Control | LADA<br>vs<br>Control |

```
kable(stat_sig[,c(5:7,10)])
```

|     | pvalue    | padj      | gene                                           | compare            |
|-----|-----------|-----------|------------------------------------------------|--------------------|
| 523 | 0.0000000 | 0.0000000 | Linoleic acid metabolism [PATH:ko00591]        | LADA vs<br>Control |
| 555 | 0.0000000 | 0.0000000 | Geraniol degradation [PATH:ko00281]            | LADA vs<br>Control |
| 515 | 0.0000000 | 0.0000000 | alpha-Linolenic acid metabolism [PATH:ko00592] | LADA vs<br>Control |

|     | pvalue    | padj      | gene                                                                      | compare         |
|-----|-----------|-----------|---------------------------------------------------------------------------|-----------------|
| 321 | 0.0000000 | 0.0000000 | Ether lipid metabolism [PATH:ko00565]                                     | Control vs T2D  |
| 326 | 0.0000000 | 0.0000001 | Linoleic acid metabolism [PATH:ko00591]                                   | Control vs T2D  |
| 318 | 0.0000000 | 0.0000001 | alpha-Linolenic acid metabolism [PATH:ko00592]                            | Control vs T2D  |
| 358 | 0.0000000 | 0.0000001 | Geraniol degradation [PATH:ko00281]                                       | Control vs T2D  |
| 518 | 0.0000000 | 0.0000002 | Ether lipid metabolism [PATH:ko00565]                                     | LADA vs Control |
| 580 | 0.0000000 | 0.0000002 | Toluene degradation [PATH:ko00623]                                        | LADA vs Control |
| 574 | 0.0000000 | 0.0000003 | Ethylbenzene degradation [PATH:ko00642]                                   | LADA vs Control |
| 859 | 0.0000000 | 0.0000007 | Betalain biosynthesis [PATH:ko00965]                                      | LADA vs T1D     |
| 917 | 0.0000000 | 0.0000014 | Linoleic acid metabolism [PATH:ko00591]                                   | LADA vs T1D     |
| 662 | 0.0000000 | 0.0000026 | Betalain biosynthesis [PATH:ko00965]                                      | T1D vs T2D      |
| 377 | 0.0000001 | 0.0000033 | Ethylbenzene degradation [PATH:ko00642]                                   | Control vs T2D  |
| 383 | 0.0000001 | 0.0000033 | Toluene degradation [PATH:ko00623]                                        | Control vs T2D  |
| 720 | 0.0000001 | 0.0000093 | Linoleic acid metabolism [PATH:ko00591]                                   | T1D vs T2D      |
| 572 | 0.0000004 | 0.0000101 | Drug metabolism - cytochrome P450 [PATH:ko00982]                          | LADA vs Control |
| 576 | 0.0000004 | 0.0000106 | Metabolism of xenobiotics by cytochrome P450 [PATH:ko00980]               | LADA vs Control |
| 715 | 0.0000002 | 0.0000142 | Ether lipid metabolism [PATH:ko00565]                                     | T1D vs T2D      |
| 974 | 0.0000010 | 0.0000673 | Toluene degradation [PATH:ko00623]                                        | LADA vs T1D     |
| 465 | 0.0000035 | 0.0000767 | Betalain biosynthesis [PATH:ko00965]                                      | LADA vs Control |
| 912 | 0.0000023 | 0.0001137 | Ether lipid metabolism [PATH:ko00565]                                     | LADA vs T1D     |
| 949 | 0.0000029 | 0.0001137 | Geraniol degradation [PATH:ko00281]                                       | LADA vs T1D     |
| 375 | 0.0000065 | 0.0001841 | Drug metabolism - cytochrome P450 [PATH:ko00982]                          | Control vs T2D  |
| 379 | 0.0000078 | 0.0001914 | Metabolism of xenobiotics by cytochrome P450 [PATH:ko00980]               | Control vs T2D  |
| 268 | 0.0000126 | 0.0002765 | Betalain biosynthesis [PATH:ko00965]                                      | Control vs T2D  |
| 909 | 0.0000097 | 0.0003169 | alpha-Linolenic acid metabolism [PATH:ko00592]                            | LADA vs T1D     |
| 777 | 0.0000081 | 0.0003631 | Toluene degradation [PATH:ko00623]                                        | T1D vs T2D      |
| 752 | 0.0000092 | 0.0003631 | Geraniol degradation [PATH:ko00281]                                       | T1D vs T2D      |
| 378 | 0.0000263 | 0.0005176 | Fluorobenzoate degradation [PATH:ko00364]                                 | Control vs T2D  |
| 900 | 0.0000184 | 0.0005188 | Glycosphingolipid biosynthesis - lacto and neolacto series [PATH:ko00601] | LADA vs T1D     |
| 712 | 0.0000182 | 0.0005972 | alpha-Linolenic acid metabolism [PATH:ko00592]                            | T1D vs T2D      |

|     | pvalue    | padj      | gene                                                                      | compare         |
|-----|-----------|-----------|---------------------------------------------------------------------------|-----------------|
| 772 | 0.0000379 | 0.0010678 | Fluorobenzoate degradation [PATH:ko00364]                                 | T1D vs T2D      |
| 554 | 0.0000575 | 0.0011323 | Carotenoid biosynthesis [PATH:ko00906]                                    | LADA vs Control |
| 575 | 0.0001318 | 0.0023610 | Fluorobenzoate degradation [PATH:ko00364]                                 | LADA vs Control |
| 969 | 0.0001414 | 0.0034809 | Fluorobenzoate degradation [PATH:ko00364]                                 | LADA vs T1D     |
| 968 | 0.0001706 | 0.0037353 | Ethylbenzene degradation [PATH:ko00642]                                   | LADA vs T1D     |
| 966 | 0.0002368 | 0.0046652 | Drug metabolism - cytochrome P450 [PATH:ko00982]                          | LADA vs T1D     |
| 970 | 0.0002618 | 0.0046880 | Metabolism of xenobiotics by cytochrome P450 [PATH:ko00980]               | LADA vs T1D     |
| 703 | 0.0003218 | 0.0079248 | Glycosphingolipid biosynthesis - lacto and neolacto series [PATH:ko00601] | T1D vs T2D      |
| 771 | 0.0005056 | 0.0110677 | Ethylbenzene degradation [PATH:ko00642]                                   | T1D vs T2D      |
| 537 | 0.0008132 | 0.0133495 | Retinol metabolism [PATH:ko00830]                                         | LADA vs Control |
| 769 | 0.0012164 | 0.0239621 | Drug metabolism - cytochrome P450 [PATH:ko00982]                          | T1D vs T2D      |
| 773 | 0.0013380 | 0.0239621 | Metabolism of xenobiotics by cytochrome P450 [PATH:ko00980]               | T1D vs T2D      |
| 9   | 0.0001926 | 0.0359443 | Bacterial chemotaxis [PATH:ko02030]                                       | Control vs T1D  |
| 10  | 0.0003649 | 0.0359443 | Flagellar assembly [PATH:ko02040]                                         | Control vs T1D  |
| 357 | 0.0020193 | 0.0361635 | Carotenoid biosynthesis [PATH:ko00906]                                    | Control vs T2D  |
| 604 | 0.0038884 | 0.0638339 | Biofilm formation - Pseudomonas aeruginosa [PATH:ko02025]                 | T1D vs T2D      |
| 600 | 0.0048372 | 0.0733021 | Bacterial chemotaxis [PATH:ko02030]                                       | T1D vs T2D      |
| 842 | 0.0048382 | 0.0794274 | Ribosome biogenesis in eukaryotes [PATH:ko03008]                          | LADA vs T1D     |
| 586 | 0.0064082 | 0.0903513 | Biosynthesis of terpenoids and steroids                                   | LADA vs Control |
| 516 | 0.0064209 | 0.0903513 | Arachidonic acid metabolism [PATH:ko00590]                                | LADA vs Control |
| 402 | 0.0069920 | 0.0918277 | p53 signaling pathway [PATH:ko04115]                                      | LADA vs Control |

### ##Venn diagram comparing LADA to other groups

```

sig_LADA <- subset(stat_sig, g1=="LADA")
sig_LADA_T1D <- subset(sig_LADA, g2=="T1D") %>% dplyr::select(one_of("gene")) %>%
  pull(gene)
sig_LADA_T2D <- subset(sig_LADA, g2=="T2D") %>% dplyr::select(one_of("gene")) %>%
  pull(gene)
sig_LADA_Control <- subset(sig_LADA, g2=="Control") %>% dplyr::select(one_of("gene")) %>%
  pull(gene)

#Colors
myCol <- c( "#1F78B4", "#33A02C", "#666666" )
#
temp <- venn.diagram(list(T1D = sig_LADA_T1D,
                        T2D = sig_LADA_T2D,

```

```

Control = sig_LADA_Control), filename = NULL,

# Circles
lwd = 2,
lty = 'blank',
fill = myCol,

# Numbers
cex = 3,
fontface = "bold",
fontfamily = "sans",

# Set names
cat.cex = 3,
cat.fontface = "bold",
cat.default.pos = "outer",
cat.pos = c(0, 0, 0),
cat.dist = c(0.085, 0.085, 0.024),
cat.fontfamily = "sans",
rotation = 1)

```

```
grid.arrange(gTree(children=temp))
```

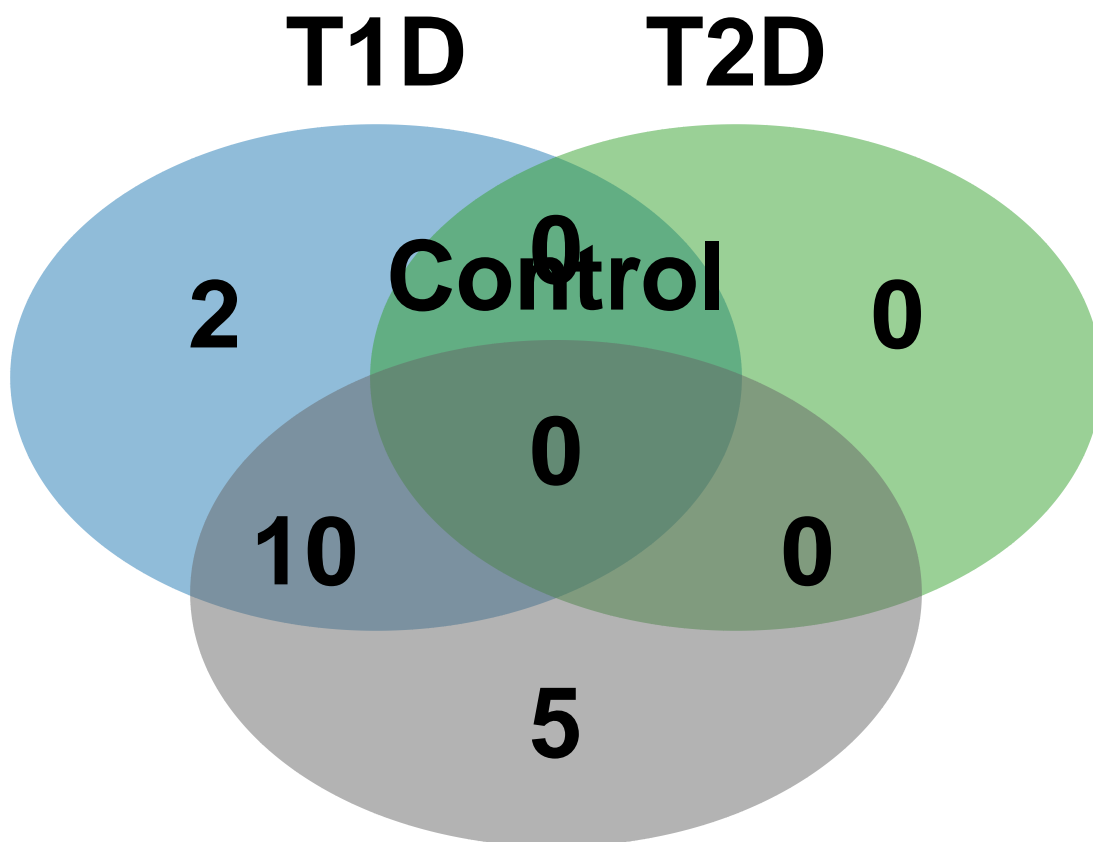

```
Fig2List[[ "VennLADA" ]] <-
  gTree(children=temp, top="N differential abundant relative to LADA")
```

```
#Genera LADA that are significantly different from all other groups
intersect(intersect(sig_LADA_T1D,sig_LADA_T2D),sig_LADA_Control)
```

```
character(0)
```

```
##Venn diagram comparing T1D to other groups
sig_T1D <- subset(stat_sig, g1=="T1D" | g2=="T1D")
sig_T1D_LADA <- subset(sig_T1D, g1=="LADA") %>% dplyr::select(one_of("gene")) %>%
  pull(gene)
sig_T1D_T2D <- subset(sig_T1D, g2=="T2D") %>% dplyr::select(one_of("gene")) %>%
  pull(gene)
sig_T1D_Control <- subset(sig_T1D, g1=="Control") %>% dplyr::select(one_of("gene")) %>%
  pull(gene)
#Colors
myCol <- c( "#E31A1C", "#33A02C", "#666666" )
#
temp <- venn.diagram(list(LADA = sig_T1D_LADA,
                        T2D = sig_T1D_T2D,
                        Control = sig_T1D_Control), filename = NULL,

                    # Circles
                    lwd = 2,
                    lty = 'blank',
                    fill = myCol,

                    # Numbers
                    cex = 2,
                    fontface = "bold",
                    fontfamily = "sans",

                    # Set names
                    cat.cex = 2,
                    cat.fontface = "bold",
                    cat.default.pos = "outer",
                    cat.pos = c(0, 0, 0),
                    cat.dist = c(0.055, 0.055, 0.024),
                    cat.fontfamily = "sans",
                    rotation = 1)

grid.arrange(gTree(children=temp))
```

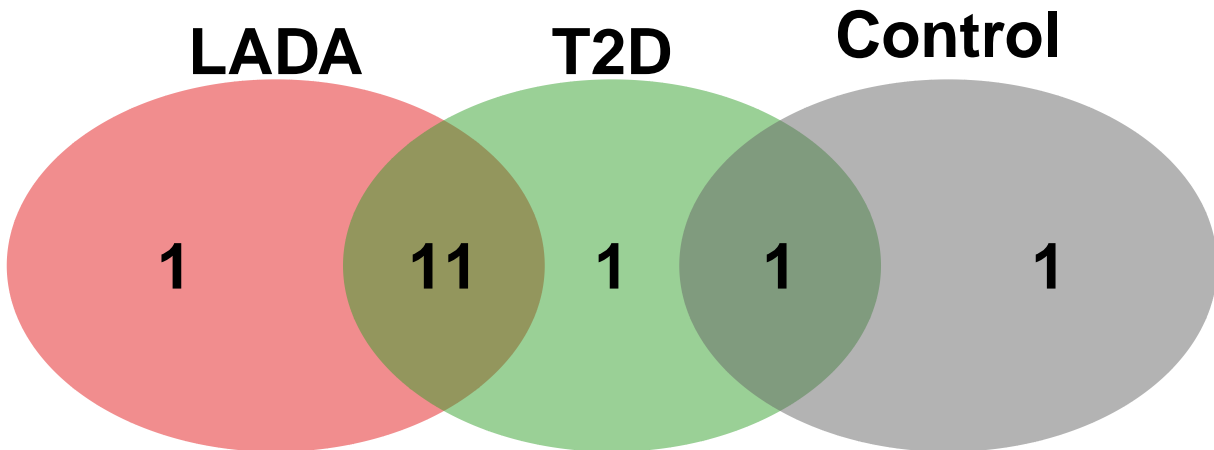

```
Fig2List[[ "VennT1D" ]] <-
  gTree(children=temp, top="N differential abundant relative to T1D")
```

```
#Genera T1D that are significantly different from all other groups
intersect(intersect(sig_T1D_LADA,sig_T1D_T2D),sig_T1D_Control)
```

```
character(0)
```

```
##Venn diagram comparing T2D to other groups
sig_T2D <- subset(stat_sig, g1=="T2D" | g2=="T2D")
sig_T2D_LADA <- subset(sig_T2D, g1=="LADA") %>% dplyr::select(one_of("gene")) %>%
  pull(gene)
sig_T2D_T1D <- subset(sig_T2D, g1=="T1D") %>% dplyr::select(one_of("gene")) %>%
  pull(gene)
sig_T2D_Control <- subset(sig_T2D, g1=="Control") %>% dplyr::select(one_of("gene")) %>%
  pull(gene)
#Colors
myCol <- c( "#E31A1C", "#1F78B4", "#666666")
#
temp <- venn.diagram(list(LADA = sig_T2D_LADA,
                        T1D = sig_T2D_T1D,
                        Control = sig_T2D_Control), filename = NULL,

# Circles
lwd = 2,
```



```

lty = 'blank',
fill = myCol,

# Numbers
cex = 2,
fontface = "bold",
fontfamily = "sans",

# Set names
cat.cex = 2,
cat.fontface = "bold",
cat.default.pos = "outer",
cat.pos = c(0, 0, 0),
cat.dist = c(0.055, 0.055, 0.024),
cat.fontfamily = "sans",
rotation = 1)

```

```
grid.arrange(gTree(children=temp))
```

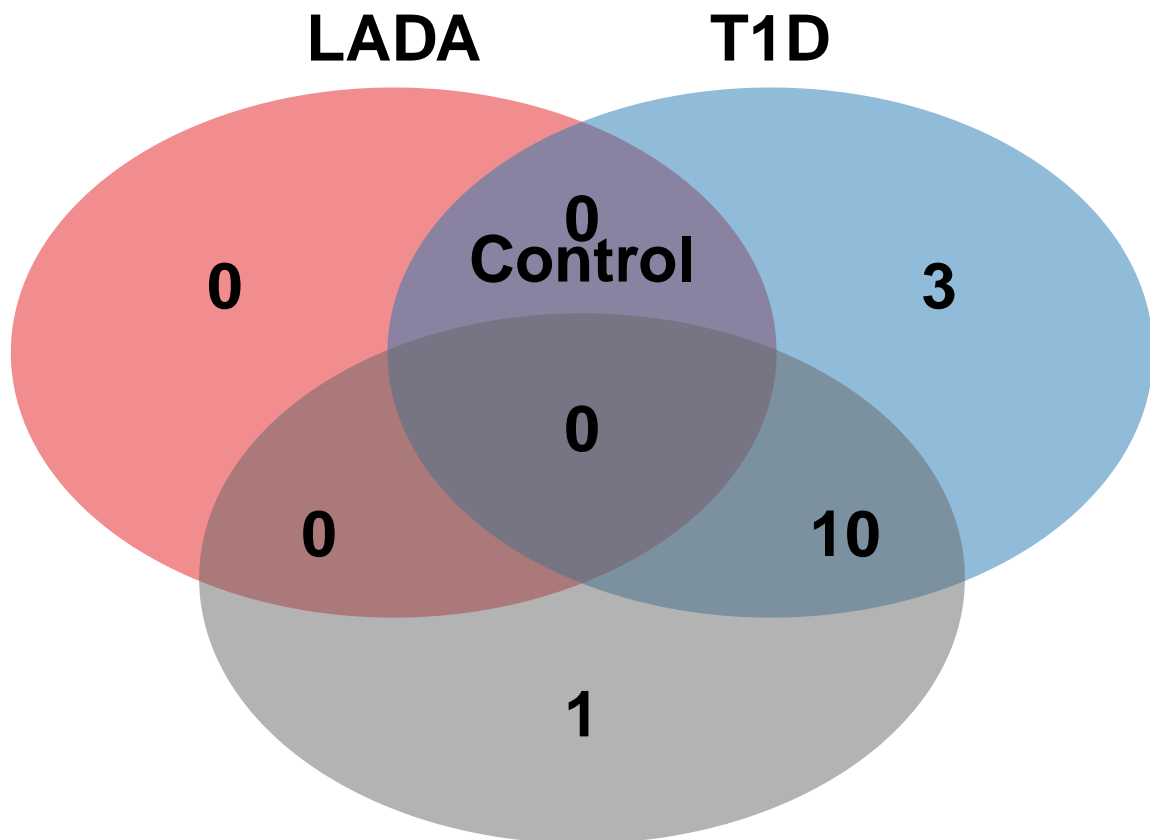

```

Fig2List[[ "VennT2D" ]] <-
  gTree(children=temp, top="N differential abundant relative to T2D")

```

```

#Genera T2D that are significantly different from all other groups
intersect(intersect(sig_T2D_LADA,sig_T2D_T1D),sig_T2D_Control)

```

character(0)

```
##Venn diagram comparing controls to other groups
sig_Control <- subset(stat_sig, g1=="Control" | g2=="Control")
sig_Control_LADA <- subset(sig_Control, g1=="LADA") %>% dplyr::select(one_of("gene")) %>%
  pull(gene)
sig_Control_T1D <- subset(sig_Control, g2=="T1D") %>% dplyr::select(one_of("gene")) %>%
  pull(gene)
sig_Control_T2D <- subset(sig_Control, g2=="T2D") %>% dplyr::select(one_of("gene")) %>%
  pull(gene)
#Colors
myCol <- c( "#E31A1C", "#1F78B4", "#33A02C")
#
temp <- venn.diagram(list(LADA = sig_Control_LADA,
                        T1D = sig_Control_T1D,
                        T2D = sig_Control_T2D), filename = NULL,

                    # Circles
                    lwd = 2,
                    lty = 'blank',
                    fill = myCol,

                    # Numbers
                    cex = 3,
                    fontface = "bold",
                    fontfamily = "sans",

                    # Set names
                    cat.cex = 3,
                    cat.fontface = "bold",
                    cat.default.pos = "outer",
                    cat.pos = c(0, 0, 0),
                    cat.dist = c(0.055, 0.055, 0.024),
                    cat.fontfamily = "sans",
                    rotation = 1)

grid.arrange(gTree(children=temp))
```

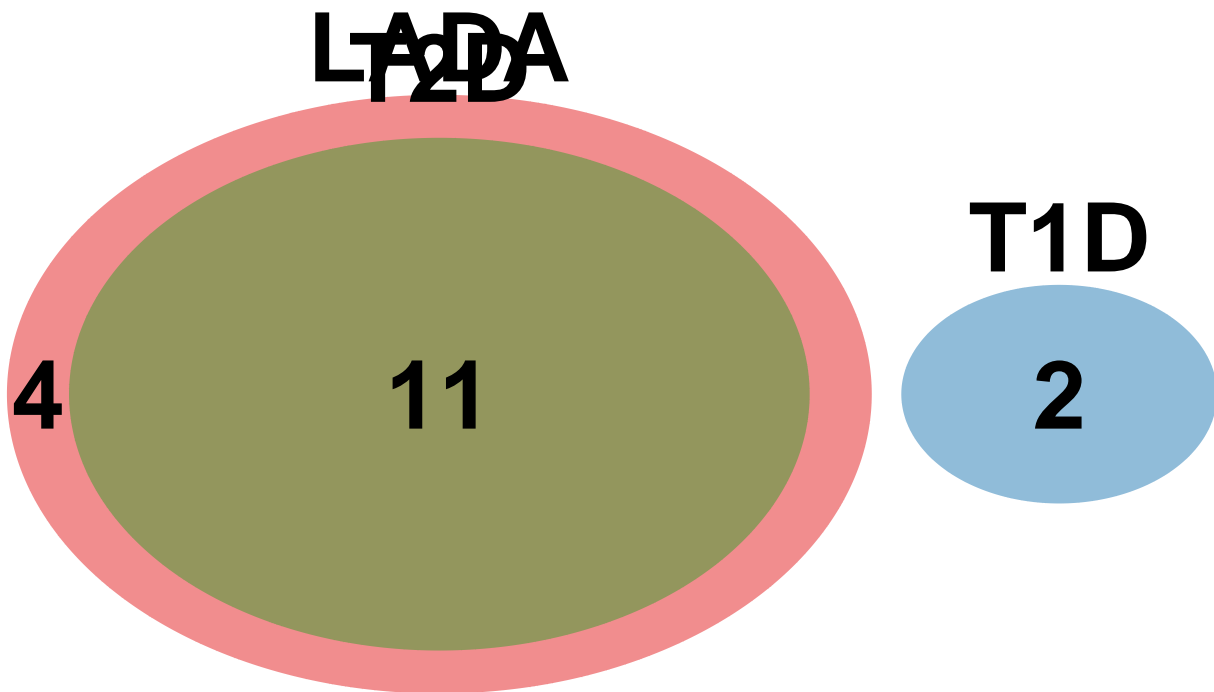

```
Fig2List[[ "VennControls" ]] <-
  gTree(children=temp, top="N differential abundant relative to controls")

#Genera Controls that are significantly different from all other groups
intersect(intersect(sig_T2D_LADA,sig_T2D_T1D),sig_T2D_Control)
```

```
character(0)
```

```
##Create boxplots / violin plots
#Normalize to get cells pr. gram feces
if (setequal(colnames(Taxonomy2), SF3$MicrobiomeID)==FALSE) {
  stop("Metadata and Taxonomy out of sync")
}

#Total sum scaling (Use relative abundances)
Taxonomy3<-sweep(Taxonomy2, 2, colSums(Taxonomy), FUN="/")
#Obtain values as cells pr. gram feces
Taxonomy3<-sweep(Taxonomy3, 2, SF3$CellNorm, FUN="*")
#Make to micro gram
Taxonomy3<-Taxonomy3/106

##Select organisms
SelOrgs<-unique(stat_sig$gene)
```

```

tTaxSelect<-dplyr::select(as.data.frame(t(Taxonomy3)), one_of(c(SelOrgs)))
#Reducing the number because duplicates are removed
tTaxSelect<-add_rownames(tTaxSelect, "MicrobiomeID")
Plotting<-merge(SF3, tTaxSelect, by="MicrobiomeID")

##Might have issues with special characters, so this chunk might be needed
SelOrgs<-str_replace_all(SelOrgs, " ","_")
SelOrgs<-str_replace_all(SelOrgs, "-","_")
SelOrgs<-str_replace_all(SelOrgs, "/" ,"_")
SelOrgs<-gsub("\\[|\\]", "", SelOrgs)
SelOrgs<-str_replace_all(SelOrgs, ":" ,"_")
colnames(Plotting) <- str_replace_all(colnames(Plotting)," ","_")
colnames(Plotting) <- str_replace_all(colnames(Plotting),"-","_")
colnames(Plotting) <- str_replace_all(colnames(Plotting),"/" ,"_")
colnames(Plotting) <- gsub("\\[|\\]", "", colnames(Plotting))
colnames(Plotting) <- str_replace_all(colnames(Plotting),":" ,"_")

#Plot logs on y axis
Plotting2 <- bind_cols(Plotting[,1:16], log10(Plotting[,17:ncol(Plotting)]+1))
#See end of chunk for boxplots removed the violinplots, because of redundancy

##Create vulcano plots
#Cut offs Benjamini-Hochberg method to add to vulcano plot
#Don't know how to get exact so it is a cut-off corresponding to the BH method
BHAll<-aggregate(stat_sig[, 5:6], list(stat_sig$compare), max)
row.names(BHAll)<-BHAll$Group.1
BHLadaCon <- BHAll[which(rownames(BHAll)=="LADA vs Control"),
  which(colnames(BHAll)=="pvalue")]
BHLadaT1D <- BHAll[which(rownames(BHAll)=="LADA vs T1D"),
  which(colnames(BHAll)=="pvalue")]
BHLadaT2D <- BHAll[which(rownames(BHAll)=="LADA vs T2D"),
  which(colnames(BHAll)=="pvalue")]

#Vulcano plot
res_stat$minuslog10<--log(res_stat$pvalue)
#
#range(res_stat$minuslog10)
#range(res_stat$log2FoldChange)

names(res_stat)[names(res_stat) == 'gene'] <- 'Genus'
Feature2<-merge(res_stat, Feature, by="Genus")

#Create column org grouping for colouring
Feature2$Level_1 <- ifelse(Feature2$Level_1=="Environmental Information Processing",
  "Environmental Information Processing",
  ifelse(Feature2$Level_1=="Cellular Processes", "Cellular Processes",
  ifelse(Feature2$Level_1=="Metabolism", "Metabolism",
  ifelse(Feature2$Level_1=="Genetic Information Processing", "Genetic Information Processing",
  ifelse(Feature2$Level_1=="Unclassified metabolism", "Unclassified metabolism",
  "Other")))))
#Order Level_1 for plotting

```

```

Feature2$Level_1 <- factor(Feature2$Level_1, levels=c("Cellular Processes", "Genetic Information Process
"Metabolism", "Environmental Information Processing",
"Unclassified metabolism", "Other"))

##Summary significant orgs
#aggregate(Plotting[, 17:ncol(Plotting)], list(Plotting$Diagnosis), mean)
#aggregate(Plotting[, 17:ncol(Plotting)], list(Plotting$Diagnosis), sd)
zeroes <- function(x){
  sum(x == 0)
}
#aggregate(Plotting[, 17:ncol(Plotting)], list(Plotting$Diagnosis), zeroes)
zerocounts <- aggregate(Plotting[, 17:ncol(Plotting)], list(Plotting$Diagnosis), zeroes)
#bind_cols(zerocounts[,1], zerocounts[,2:ncol(zerocounts)]/c(70,30,70,70)*100)

#Add prevalence to plotting
prevalence<-data.frame((240-apply(Taxonomy, 1, zeroes))/240*100)
colnames(prevalence) <- c("Prevalence")
prevalence<-add_rownames(prevalence, var = "Genus")
Feature2 <- merge(Feature2, prevalence, by="Genus")

#Define boundaries
#Always run first without these lines to get indication of very low and high
#log2FoldChange and pvalue
Featurein <- filter(Feature2, -3<log2FoldChange & log2FoldChange<3 & 10>minuslog10)
Featureout <- filter(Feature2, -3>log2FoldChange | 3<log2FoldChange | 10<minuslog10)
Featureout$log2FoldChange[Featureout$log2FoldChange > 3] <- 3
Featureout$log2FoldChange[Featureout$log2FoldChange < (-3)] <- -3
Featureout$minuslog10[Featureout$minuslog10 > 10] <- 10

#Add text to vulcano plots
p1<-ggplot() +
  geom_point(data=Featurein[which(Featurein$Level_1=="Cellular Processes" &
    Featurein$compare=="LADA vs T1D"), ],
    aes(x=log2FoldChange, y=minuslog10, group=Genus), color="#A6CEE3", shape=16,
    size=Featurein[which(Featurein$Level_1=="Cellular Processes" &
    Featurein$compare=="LADA vs T1D"), ]
    [,ncol(Featurein)]/40+0.5) +
  #did not add jitter to the first on purpose. Sizes are scaled from percent
  #to the range 0.5-3
  geom_point(data=Featureout[which(Featureout$Level_1=="Cellular Processes" &
    Featureout$compare=="LADA vs T1D"), ],
    aes(x=log2FoldChange, y=minuslog10, group=Genus), color="#A6CEE3", shape=18,
    size=Featureout[which(Featureout$Level_1=="Cellular Processes" &
    Featureout$compare=="LADA vs T1D"), ]
    [,ncol(Featureout)]/40+0.5) +
  geom_point(data=Featurein[which(Featurein$Level_1=="Genetic Information Processing" &
    Featurein$compare=="LADA vs T1D"), ],
    aes(x=log2FoldChange, y=minuslog10, group=Genus), color="#FB9A99", shape=16,
    size=Featurein[which(Featurein$Level_1=="Genetic Information Processing" &

```

```

        Featurein$compare=="LADA vs T1D"), ]
    [,ncol(Featurein)]/40+0.5) +
geom_jitter(data=Featureout[which(Featureout$Level_1=="Genetic Information Processing" &
    Featureout$compare=="LADA vs T1D"), ],
    aes(x=log2FoldChange, y=minuslog10, group=Genus), color="#FB9A99", shape=18,
    size=Featureout[which(Featureout$Level_1=="Genetic Information Processing" &
    Featureout$compare=="LADA vs T1D"), ]
    [,ncol(Featureout)]/40+0.5, width = 0.1, height = 0.1) +
geom_point(data=Featurein[which(Featurein$Level_1=="Metabolism" &
    Featurein$compare=="LADA vs T1D"), ],
    aes(x=log2FoldChange, y=minuslog10, group=Genus), color="#FDBF6F", shape=16,
    size=Featurein[which(Featurein$Level_1=="Metabolism" &
    Featurein$compare=="LADA vs T1D"), ]
    [,ncol(Featurein)]/40+0.5) +
geom_jitter(data=Featureout[which(Featureout$Level_1=="Metabolism" &
    Featureout$compare=="LADA vs T1D"), ],
    aes(x=log2FoldChange, y=minuslog10, group=Genus), color="#FDBF6F", shape=18,
    size=Featureout[which(Featureout$Level_1=="Metabolism" &
    Featureout$compare=="LADA vs T1D"), ]
    [,ncol(Featureout)]/40+0.5, width = 0.1, height = 0.1) +
geom_point(data=Featurein[which(Featurein$Level_1=="Environmental Information Processing" &
    Featurein$compare=="LADA vs T1D"), ],
    aes(x=log2FoldChange, y=minuslog10, group=Genus),
    color="#B2DF8A", shape=16, alpha=0.75,
    size=Featurein[which(Featurein$Level_1=="Environmental Information Processing" &
    Featurein$compare=="LADA vs T1D"), ]
    [,ncol(Featurein)]/40+0.5) +
geom_jitter(data=Featureout[which(Featureout$Level_1=="Environmental Information Processing" &
    Featureout$compare=="LADA vs T1D"), ],
    aes(x=log2FoldChange, y=minuslog10, group=Genus),
    color="#B2DF8A", shape=18,
    size=Featureout[which(Featureout$Level_1=="Environmental Information Processing" &
    Featureout$compare=="LADA vs T1D"), ]
    [,ncol(Featureout)]/40+0.5, width = 0.1, height = 0.1) +
geom_point(data=Featurein[which(Featurein$Level_1=="Unclassified metabolism" &
    Featurein$compare=="LADA vs T1D"), ],
    aes(x=log2FoldChange, y=minuslog10, group=Genus), color="#CAB2D6", shape=16,
    size=Featurein[which(Featurein$Level_1=="Unclassified metabolism" &
    Featurein$compare=="LADA vs T1D"), ]
    [,ncol(Featurein)]/40+0.5) +
geom_jitter(data=Featureout[which(Featureout$Level_1=="Unclassified metabolism" &
    Featureout$compare=="LADA vs T1D"), ],
    aes(x=log2FoldChange, y=minuslog10, group=Genus), color="#CAB2D6", shape=18,
    size=Featureout[which(Featureout$Level_1=="Unclassified metabolism" &
    Featureout$compare=="LADA vs T1D"), ]
    [,ncol(Featureout)]/40+0.5, width = 0.1, height = 0.1) +
geom_point(data=Featurein[which(Featurein$Level_1=="Other" &
    Featurein$compare=="LADA vs T1D"), ],
    aes(x=log2FoldChange, y=minuslog10, group=Genus), color="#B3B3B3", shape=16,
    size=Featurein[which(Featurein$Level_1=="Other" &
    Featurein$compare=="LADA vs T1D"), ]
    [,ncol(Featurein)]/40+0.5) +
geom_jitter(data=Featureout[which(Featureout$Level_1=="Other" &

```

```

        Featureout$compare=="LADA vs T1D"), ],
    aes(x=log2FoldChange, y=minuslog10, group=Genus), color="#B3B3B3", shape=18,
    size=Featureout[which(Featureout$Level_1=="Other" &
        Featureout$compare=="LADA vs T1D"), ]
    [,ncol(Featureout)]/40+0.5, width = 0.1, height = 0.1) +
geom_text(data=Featurein[which(Featurein$padj<padj_threshold &
    Featurein$compare=="LADA vs T1D"), ],
    aes(x=log2FoldChange, y=minuslog10, group=Genus, label=Genus),
    nudge_y = 0.2, size=2.5) +
geom_text(data=Featureout[which(Featureout$padj<padj_threshold &
    Featureout$compare=="LADA vs T1D"), ],
    aes(x=log2FoldChange, y=minuslog10, group=Genus, label=Genus),
    nudge_x=0.6, nudge_y = -0.2, size=2.5) +
# geom_text(data=Featureout[which(Featureout$padj<padj_threshold &
#     Featureout$compare=="LADA vs T1D" &
#     Featureout$Genus=="Rikenellaceae_RC9_gut_group"), ],
#     aes(x=log2FoldChange, y=minuslog10, group=Genus, label=Genus),
#     nudge_x=1.22, nudge_y = 0) +
geom_hline(yintercept = -log(0.05), linetype="dashed") +
geom_hline(yintercept = -log(BHLadaT1D), linetype="dashed", alpha=0.1) +
geom_vline(xintercept = -1, linetype="dashed") +
geom_vline(xintercept = 1, linetype="dashed") +
theme_bw() +
ggtitle("T1D") +
xlab("Log2 fold change") +
ylab("-log10(P)") +
theme(panel.grid.major = element_blank(),
    panel.grid.minor = element_blank(),
    axis.title=element_text(size=22),
    legend.position="bottom",
    legend.title=element_text(size=20),
    legend.text=element_text(size=20),
    axis.text.x = element_text(angle = 45, hjust = 1, size=12),
    axis.text.y = element_text(angle = 45, hjust = 1, size=12),
    plot.title = element_text(size = 22, hjust=0.5))
#ggplotly(p1)
p1

```

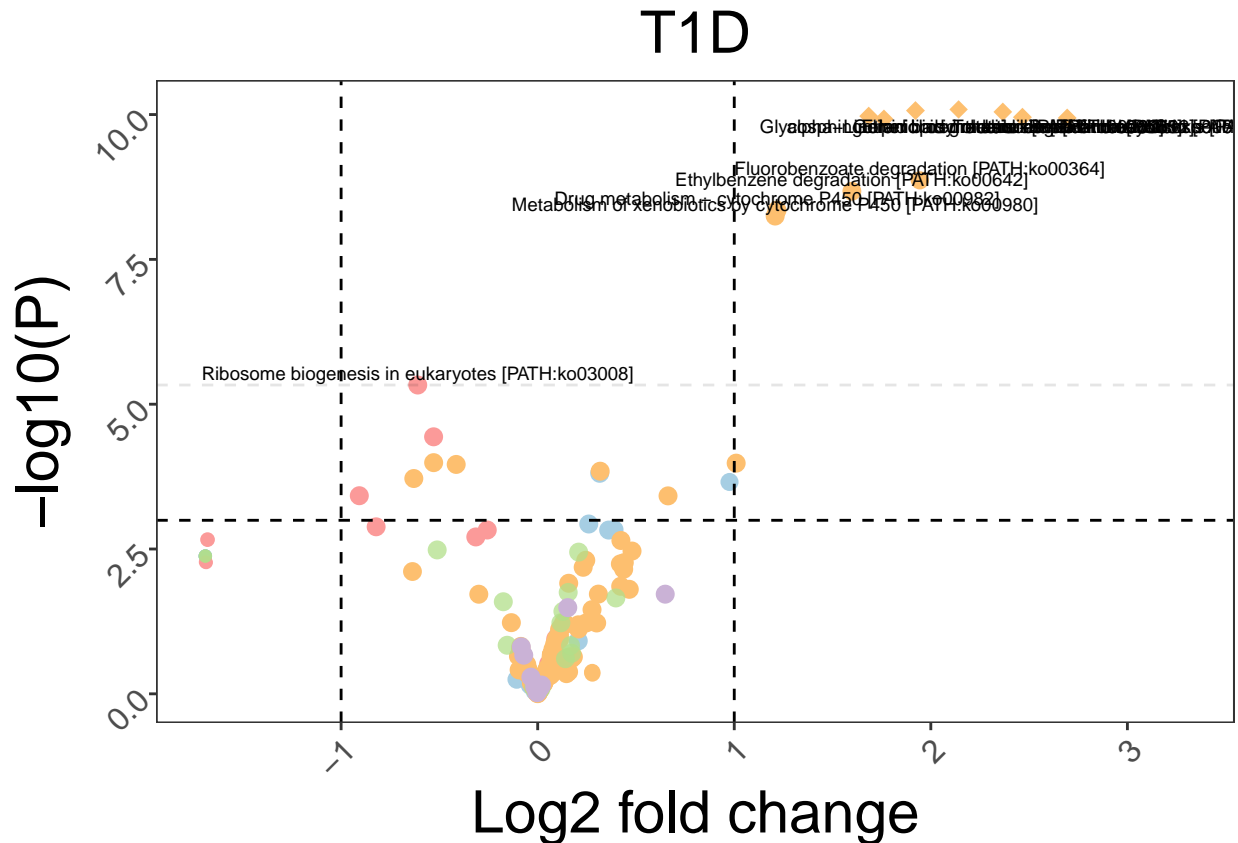

```
Fig2List[["vulcLadaT1D"]] <- p1
```

```
p2<-ggplot() +
  geom_point(data=Featurein[which(Featurein$Level_1=="Cellular Processes" &
    Featurein$compare=="LADA vs T2D"), ],
    aes(x=log2FoldChange, y=minuslog10, group=Genus), color="#A6CEE3", shape=16,
    size=Featurein[which(Featurein$Level_1=="Cellular Processes" &
    Featurein$compare=="LADA vs T2D"), ]
    [,ncol(Featurein)]/40+0.5) +
  #did not add jitter to the first on purpose. Sizes are scaled from percent
  #to the range 0.5-3
  geom_point(data=Featureout[which(Featureout$Level_1=="Cellular Processes" &
    Featureout$compare=="LADA vs T2D"), ],
    aes(x=log2FoldChange, y=minuslog10, group=Genus), color="#A6CEE3", shape=18,
    size=Featureout[which(Featureout$Level_1=="Cellular Processes" &
    Featureout$compare=="LADA vs T2D"), ]
    [,ncol(Featureout)]/40+0.5) +
  geom_point(data=Featurein[which(Featurein$Level_1=="Genetic Information Processing" &
    Featurein$compare=="LADA vs T2D"), ],
    aes(x=log2FoldChange, y=minuslog10, group=Genus), color="#FB9A99", shape=16,
    size=Featurein[which(Featurein$Level_1=="Genetic Information Processing" &
    Featurein$compare=="LADA vs T2D"), ]
    [,ncol(Featurein)]/40+0.5) +
  geom_jitter(data=Featureout[which(Featureout$Level_1=="Genetic Information Processing" &
    Featureout$compare=="LADA vs T2D"), ],
```



```

aes(x=log2FoldChange, y=minuslog10, group=Genus), color="#FB9A99", shape=18,
size=Featureout[which(Featureout$Level_1=="Genetic Information Processing" &
  Featureout$compare=="LADA vs T2D"), ]
[,ncol(Featureout)]/40+0.5,
width = 0.1, height = 0.1) +
geom_point(data=Featurein[which(Featurein$Level_1=="Metabolism" &
  Featurein$compare=="LADA vs T2D"), ],
aes(x=log2FoldChange, y=minuslog10, group=Genus), color="#FDBF6F", shape=16,
size=Featurein[which(Featurein$Level_1=="Metabolism" &
  Featurein$compare=="LADA vs T2D"), ]
[,ncol(Featurein)]/40+0.5) +
geom_jitter(data=Featureout[which(Featureout$Level_1=="Metabolism" &
  Featureout$compare=="LADA vs T2D"), ],
aes(x=log2FoldChange, y=minuslog10, group=Genus), color="#FDBF6F", shape=18,
size=Featureout[which(Featureout$Level_1=="Metabolism" &
  Featureout$compare=="LADA vs T2D"), ]
[,ncol(Featureout)]/40+0.5, width = 0.1, height = 0.1) +
geom_point(data=Featurein[which(Featurein$Level_1=="Environmental Information Processing" &
  Featurein$compare=="LADA vs T2D"), ],
aes(x=log2FoldChange, y=minuslog10, group=Genus),
color="#B2DF8A", shape=16, alpha=0.75,
size=Featurein[which(Featurein$Level_1=="Environmental Information Processing" &
  Featurein$compare=="LADA vs T2D"), ]
[,ncol(Featurein)]/40+0.5) +
geom_jitter(data=Featureout[which(Featureout$Level_1=="Environmental Information Processing" &
  Featureout$compare=="LADA vs T2D"), ],
aes(x=log2FoldChange, y=minuslog10, group=Genus),
color="#B2DF8A", shape=18,
size=Featureout[which(Featureout$Level_1=="Environmental Information Processing" &
  Featureout$compare=="LADA vs T2D"), ]
[,ncol(Featureout)]/40+0.5, width = 0.1, height = 0.1) +
geom_point(data=Featurein[which(Featurein$Level_1=="Unclassified metabolism" &
  Featurein$compare=="LADA vs T2D"), ],
aes(x=log2FoldChange, y=minuslog10, group=Genus), color="#CAB2D6", shape=16,
size=Featurein[which(Featurein$Level_1=="Unclassified metabolism" &
  Featurein$compare=="LADA vs T2D"), ]
[,ncol(Featurein)]/40+0.5) +
geom_jitter(data=Featureout[which(Featureout$Level_1=="Unclassified metabolism" &
  Featureout$compare=="LADA vs T2D"), ],
aes(x=log2FoldChange, y=minuslog10, group=Genus), color="#CAB2D6", shape=18,
size=Featureout[which(Featureout$Level_1=="Unclassified metabolism" &
  Featureout$compare=="LADA vs T2D"), ]
[,ncol(Featureout)]/40+0.5, width = 0.1, height = 0.1) +
geom_point(data=Featurein[which(Featurein$Level_1=="Other" &
  Featurein$compare=="LADA vs T2D"), ],
aes(x=log2FoldChange, y=minuslog10, group=Genus), color="#B3B3B3", shape=16,
size=Featurein[which(Featurein$Level_1=="Other" &
  Featurein$compare=="LADA vs T2D"), ]
[,ncol(Featurein)]/40+0.5) +
geom_jitter(data=Featureout[which(Featureout$Level_1=="Other" &
  Featureout$compare=="LADA vs T2D"), ],
aes(x=log2FoldChange, y=minuslog10, group=Genus), color="#B3B3B3", shape=18,
size=Featureout[which(Featureout$Level_1=="Other" &

```

```

        Featureout$compare=="LADA vs T2D"), ]
      [,ncol(Featureout)]/40+0.5, width = 0.1, height = 0.1) +
geom_text(data=Featurein[which(Featurein$padj<padj_threshold &
      Featurein$compare=="LADA vs T2D"), ],
      aes(x=log2FoldChange, y=minuslog10, group=Genus, label=Genus),
      nudge_y = 0.2, size=2.5) +
geom_text(data=Featureout[which(Featureout$padj<padj_threshold &
      Featureout$compare=="LADA vs T2D"), ],
      aes(x=log2FoldChange, y=minuslog10, group=Genus, label=Genus),
      nudge_x=0.6, nudge_y = -0.2, size=2.5) +
# geom_text(data=Featureout[which(Featureout$padj<padj_threshold &
#       Featureout$compare=="LADA vs T1D" &
#       Featureout$Genus=="Rikenellaceae_RC9_gut_group"), ],
#       aes(x=log2FoldChange, y=minuslog10, group=Genus, label=Genus),
#       nudge_x=1.22, nudge_y = 0) +
geom_hline(yintercept = -log(0.05), linetype="dashed") +
geom_hline(yintercept = -log(BHLadaT2D), linetype="dashed", alpha=0.1) +
geom_vline(xintercept = -1, linetype="dashed") +
geom_vline(xintercept = 1, linetype="dashed") +
theme_bw() +
ggtitle("T2D") +
xlab("Log2 fold change") +
ylab("-log10(P)") +
theme(panel.grid.major = element_blank(),
      panel.grid.minor = element_blank(),
      axis.title=element_text(size=22),
      legend.position="bottom",
      legend.title=element_text(size=20),
      legend.text=element_text(size=20),
      axis.text.x = element_text(angle = 45, hjust = 1, size=12),
      axis.text.y = element_text(angle = 45, hjust = 1, size=12),
      plot.title = element_text(size = 22, hjust=0.5))
#ggplotly(p2)
p2

```

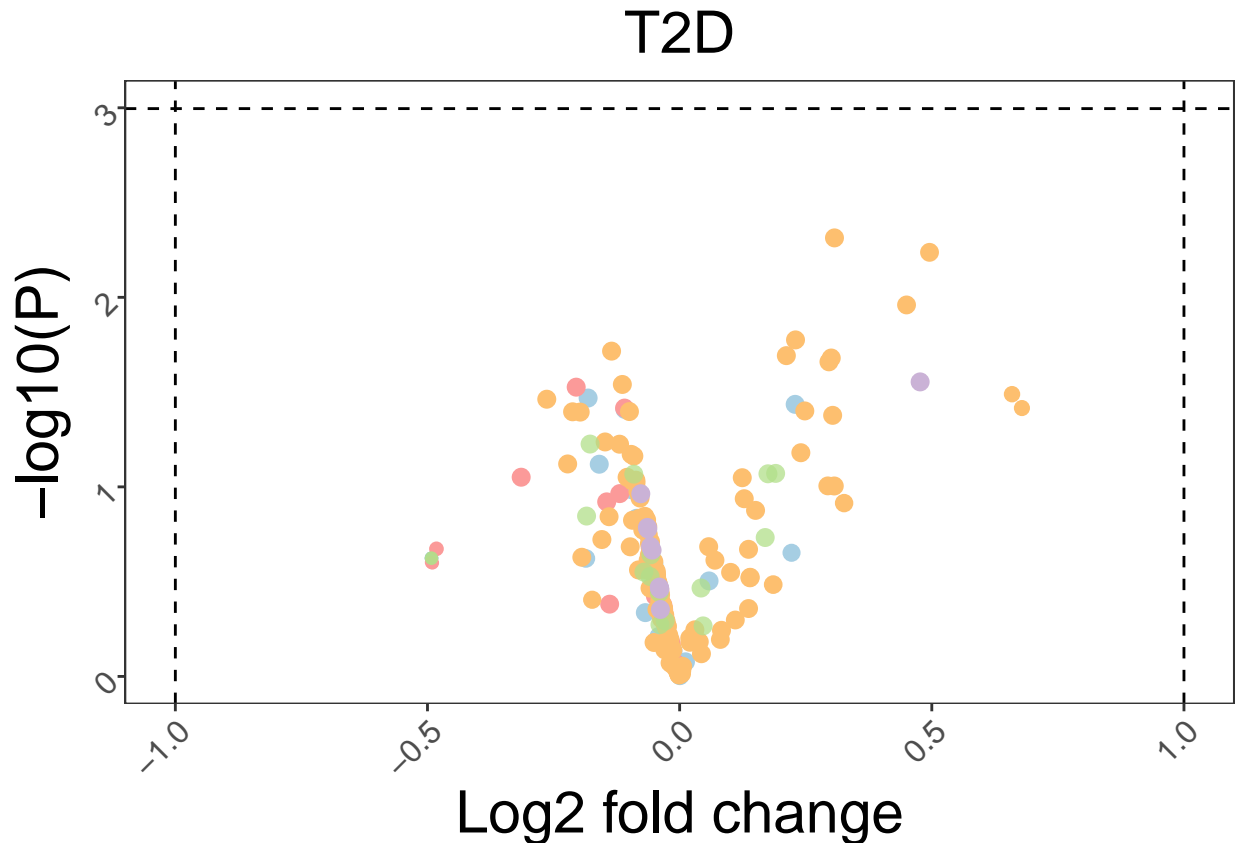

```
Fig2List[["vulcLadaT2D"]] <- p2

p3<-ggplot() +
  geom_point(data=Featurein[which(Featurein$Level_1=="Cellular Processes" &
    Featurein$compare=="LADA vs Control"), ],
    aes(x=log2FoldChange, y=minuslog10, group=Genus), color="#A6CEE3", shape=16,
    size=Featurein[which(Featurein$Level_1=="Cellular Processes" &
    Featurein$compare=="LADA vs Control"), ]
    [,ncol(Featurein)]/40+0.5) +
  #did not add jitter to the first on purpose. Sizes are scaled from percent to the range 0.5-3
  geom_point(data=Featureout[which(Featureout$Level_1=="Cellular Processes" &
    Featureout$compare=="LADA vs Control"), ],
    aes(x=log2FoldChange, y=minuslog10, group=Genus), color="#A6CEE3", shape=18,
    size=Featureout[which(Featureout$Level_1=="Cellular Processes" &
    Featureout$compare=="LADA vs Control"), ]
    [,ncol(Featureout)]/40+0.5) +
  geom_point(data=Featurein[which(Featurein$Level_1=="Genetic Information Processing" &
    Featurein$compare=="LADA vs Control"), ],
    aes(x=log2FoldChange, y=minuslog10, group=Genus), color="#FB9A99", shape=16,
    size=Featurein[which(Featurein$Level_1=="Genetic Information Processing" &
    Featurein$compare=="LADA vs Control"), ]
    [,ncol(Featurein)]/40+0.5) +
  geom_jitter(data=Featureout[which(Featureout$Level_1=="Genetic Information Processing" &
    Featureout$compare=="LADA vs Control"), ],
    aes(x=log2FoldChange, y=minuslog10, group=Genus), color="#FB9A99", shape=18,
```

```

size=Featureout[which(Featureout$Level_1=="Genetic Information Processing" &
  Featureout$compare=="LADA vs Control"), ]
[,ncol(Featureout)]/40+0.5, width = 0.1, height = 0.1) +
geom_point(data=Featurein[which(Featurein$Level_1=="Metabolism" &
  Featurein$compare=="LADA vs Control"), ],
  aes(x=log2FoldChange, y=minuslog10, group=Genus), color="#FDBF6F", shape=16,
  size=Featurein[which(Featurein$Level_1=="Metabolism" &
    Featurein$compare=="LADA vs Control"), ]
    [,ncol(Featurein)]/40+0.5) +
geom_jitter(data=Featureout[which(Featureout$Level_1=="Metabolism" &
  Featureout$compare=="LADA vs Control"), ],
  aes(x=log2FoldChange, y=minuslog10, group=Genus), color="#FDBF6F", shape=18,
  size=Featureout[which(Featureout$Level_1=="Metabolism" &
    Featureout$compare=="LADA vs Control"), ]
    [,ncol(Featureout)]/40+0.5, width = 0.1, height = 0.1) +
geom_point(data=Featurein[which(Featurein$Level_1=="Environmental Information Processing" &
  Featurein$compare=="LADA vs Control"), ],
  aes(x=log2FoldChange, y=minuslog10, group=Genus),
  color="#B2DF8A", shape=16, alpha=0.75,
  size=Featurein[which(Featurein$Level_1=="Environmental Information Processing" &
    Featurein$compare=="LADA vs Control"), ]
    [,ncol(Featurein)]/40+0.5) +
geom_jitter(data=Featureout[which(Featureout$Level_1=="Environmental Information Processing" &
  Featureout$compare=="LADA vs Control"), ],
  aes(x=log2FoldChange, y=minuslog10, group=Genus),
  color="#B2DF8A", shape=18,
  size=Featureout[which(Featureout$Level_1=="Environmental Information Processing" &
    Featureout$compare=="LADA vs Control"), ]
    [,ncol(Featureout)]/40+0.5, width = 0.1, height = 0.1) +
geom_point(data=Featurein[which(Featurein$Level_1=="Unclassified metabolism" &
  Featurein$compare=="LADA vs Control"), ],
  aes(x=log2FoldChange, y=minuslog10, group=Genus), color="#CAB2D6", shape=16,
  size=Featurein[which(Featurein$Level_1=="Unclassified metabolism" &
    Featurein$compare=="LADA vs Control"), ]
    [,ncol(Featurein)]/40+0.5) +
geom_jitter(data=Featureout[which(Featureout$Level_1=="Unclassified metabolism" &
  Featureout$compare=="LADA vs Control"), ],
  aes(x=log2FoldChange, y=minuslog10, group=Genus), color="#CAB2D6", shape=18,
  size=Featureout[which(Featureout$Level_1=="Unclassified metabolism" &
    Featureout$compare=="LADA vs Control"), ]
    [,ncol(Featureout)]/40+0.5, width = 0.1, height = 0.1) +
geom_point(data=Featurein[which(Featurein$Level_1=="Other" &
  Featurein$compare=="LADA vs Control"), ],
  aes(x=log2FoldChange, y=minuslog10, group=Genus), color="#B3B3B3", shape=16,
  size=Featurein[which(Featurein$Level_1=="Other" &
    Featurein$compare=="LADA vs Control"), ]
    [,ncol(Featurein)]/40+0.5) +
geom_jitter(data=Featureout[which(Featureout$Level_1=="Other" &
  Featureout$compare=="LADA vs Control"), ],
  aes(x=log2FoldChange, y=minuslog10, group=Genus), color="#B3B3B3", shape=18,
  size=Featureout[which(Featureout$Level_1=="Other" &
    Featureout$compare=="LADA vs Control"), ]
    [,ncol(Featureout)]/40+0.5, width = 0.1, height = 0.1) +

```

```

geom_text(data=Featurein[which(Featurein$padj<padj_threshold &
                             Featurein$compare=="LADA vs Control"), ],
          aes(x=log2FoldChange, y=minuslog10, group=Genus, label=Genus),
          nudge_y = 0.2, size=2.5) +
geom_text(data=Featureout[which(Featureout$padj<padj_threshold &
                                Featureout$compare=="LADA vs Control"), ],
          aes(x=log2FoldChange, y=minuslog10, group=Genus, label=Genus),
          nudge_x=0.6, nudge_y = -0.2, size=2.5) +
# geom_text(data=Featureout[which(Featureout$padj<padj_threshold &
#                               Featureout$compare=="LADA vs T1D" &
#                               Featureout$Genus=="Rikenellaceae_RC9_gut_group"), ],
#          aes(x=log2FoldChange, y=minuslog10, group=Genus, label=Genus),
#          nudge_x=1.22, nudge_y = 0) +
geom_hline(yintercept = -log(0.05), linetype="dashed") +
geom_hline(yintercept = -log(BHLadaCon), linetype="dashed", alpha=0.1) +
geom_vline(xintercept = -1, linetype="dashed") +
geom_vline(xintercept = 1, linetype="dashed") +
theme_bw() +
ggtitle("Controls") +
xlab("Log2 fold change") +
ylab("-log10(P)") +
theme(panel.grid.major = element_blank(),
      panel.grid.minor = element_blank(),
      axis.title=element_text(size=22),
      legend.position="bottom",
      legend.title=element_text(size=20),
      legend.text=element_text(size=20),
      axis.text.x = element_text(angle = 45, hjust = 1, size=12),
      axis.text.y = element_text(angle = 45, hjust = 1, size=12),
      plot.title = element_text(size = 22, hjust=0.5))
#ggplotly(p3)
p3

```

# Controls

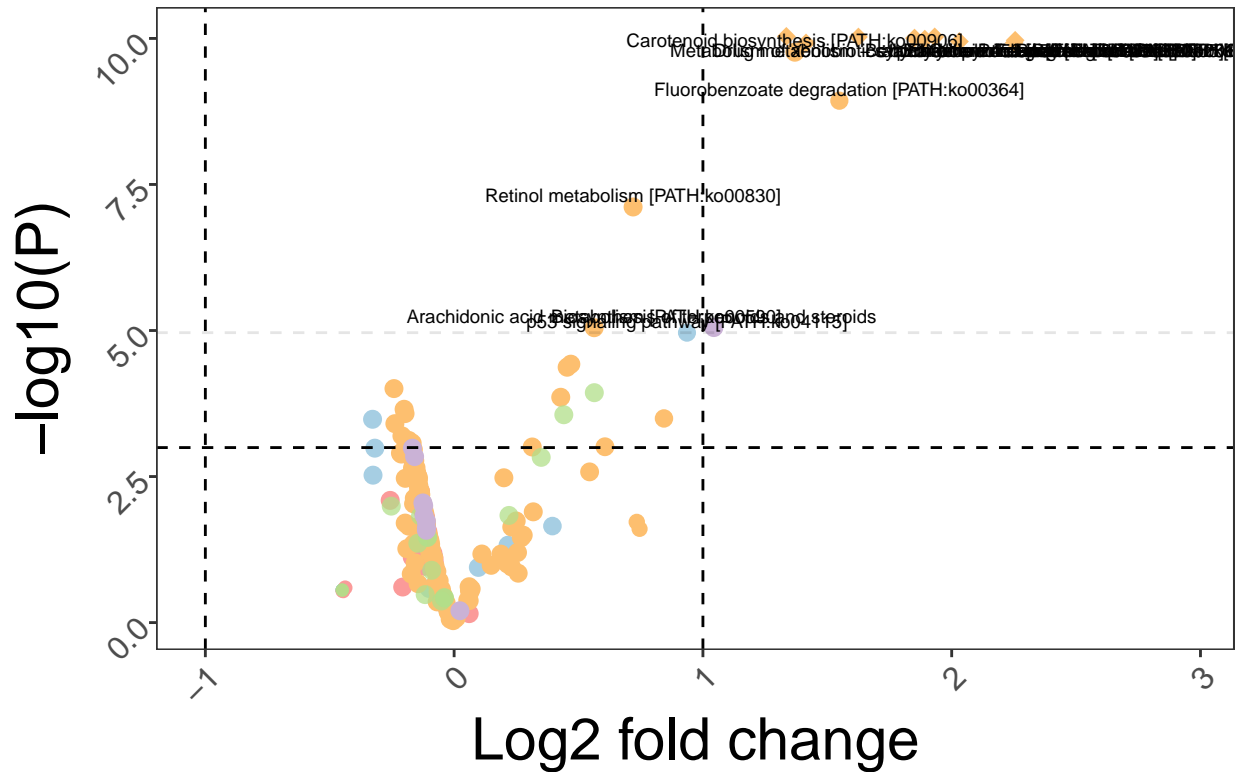

```
Fig2List[["vulcLadaControl"]] <- p3
```

```
lay <- rbind(c(1,2,3))
pdf(paste("MicroLADA_Vulcano_Func.pdf", sep=""), width=15, height=5)
grid.arrange(p1,p2,p3,layout_matrix = lay)
dev.off()
```

pdf 2

```
##Boxplot with stats intertwined
#Stats have to be in the end of the chunk don't ask me why
#Have to use the same naming in res_stat to output tables
res_stat$Genus<-str_replace_all(res_stat$Genus, " ","_")
res_stat$Genus<-str_replace_all(res_stat$Genus, "/", "_")
res_stat$Genus<-gsub("\\[|\\]", "", res_stat$Genus)
res_stat$Genus<-str_replace_all(res_stat$Genus, ":", "_")
res_stat$Genus<-str_replace_all(res_stat$Genus, "-", "_")

#Order Diagnosis
Plotting2$Diagnosis<-ordered(Plotting2$Diagnosis,
                             levels=c("Control", "T1D", "LADA", "T2D"))

#SelOrgs<-c('Linoleic_acid_metabolism_PATH_ko00591')
for (i in SelOrgs) {
  Boxplot <-
```

```

ggplot(Plotting2, aes_string(x="Diagnosis", y=i, group="Diagnosis")) +
  geom_boxplot() +
  # geom_boxplot(aes(fill=Diagnosis, trim=FALSE)) +
  # geom_jitter() +
  geom_jitter(aes(color=Diagnosis), size=2) +
  stat_summary(fun.data="mean_sdl",
              mult=1, #mean plus minus a constant (mult=1) times the st.dev
              geom="pointrange",
              width=0.2 ) +
  #stat_summary(fun.y = mean, geom = "point") +
  #facet_grid(. ~ Metformin, scales="fixed") + #Scales can also be "free"
  ggtitle(i) +
  #xlab("Diagnosis") +
  ylab("Cells pr. g feces") +
  scale_fill_manual(values=c(Control = "#666666", T1D = "#1F78B4",
                             T2D = "#33A02C", LADA = "#E31A1C")) +
  scale_color_manual(values=c(Control = "#666666", T1D = "#1F78B4",
                              T2D = "#33A02C", LADA = "#E31A1C")) +
  theme_bw() +
  theme(legend.position="none",
        title =element_text(size=18, face='bold'),
        panel.grid.major = element_blank(),
        panel.grid.minor = element_blank(),
        axis.title=element_text(size=16),
        axis.title.x = element_blank(),
        axis.text.x = element_text(angle = 45, hjust = 1, size=14),
        axis.text.y = element_text(angle = 45, hjust = 1, size=12))
Fig2List[[i]] <- Boxplot
#print(kable(stat_sig[which(stat_sig$gene==i), c(5,6,7,10)]))
cat("\n")
tabling<-res_stat[which(res_stat$Genus==i), c(5,6,7,10)]
print(kable(tabling))
#print(tabling)
cat("\n")
print(Boxplot)
}

```

|      | pvalue    | padj      | Genus                                 | compare         |
|------|-----------|-----------|---------------------------------------|-----------------|
| 523  | 0.0000000 | 0.0000000 | Linoleic_acid_metabolism_PATH_ko00591 | LADA vs Control |
| 326  | 0.0000000 | 0.0000001 | Linoleic_acid_metabolism_PATH_ko00591 | Control vs T2D  |
| 917  | 0.0000000 | 0.0000014 | Linoleic_acid_metabolism_PATH_ko00591 | LADA vs T1D     |
| 720  | 0.0000001 | 0.0000093 | Linoleic_acid_metabolism_PATH_ko00591 | T1D vs T2D      |
| 129  | 0.6440983 | 0.7508128 | Linoleic_acid_metabolism_PATH_ko00591 | Control vs T1D  |
| 1114 | 0.6989891 | 0.9515738 | Linoleic_acid_metabolism_PATH_ko00591 | LADA vs T2D     |

# Linoleic\_acid\_metabolism\_PATH\_ko0059

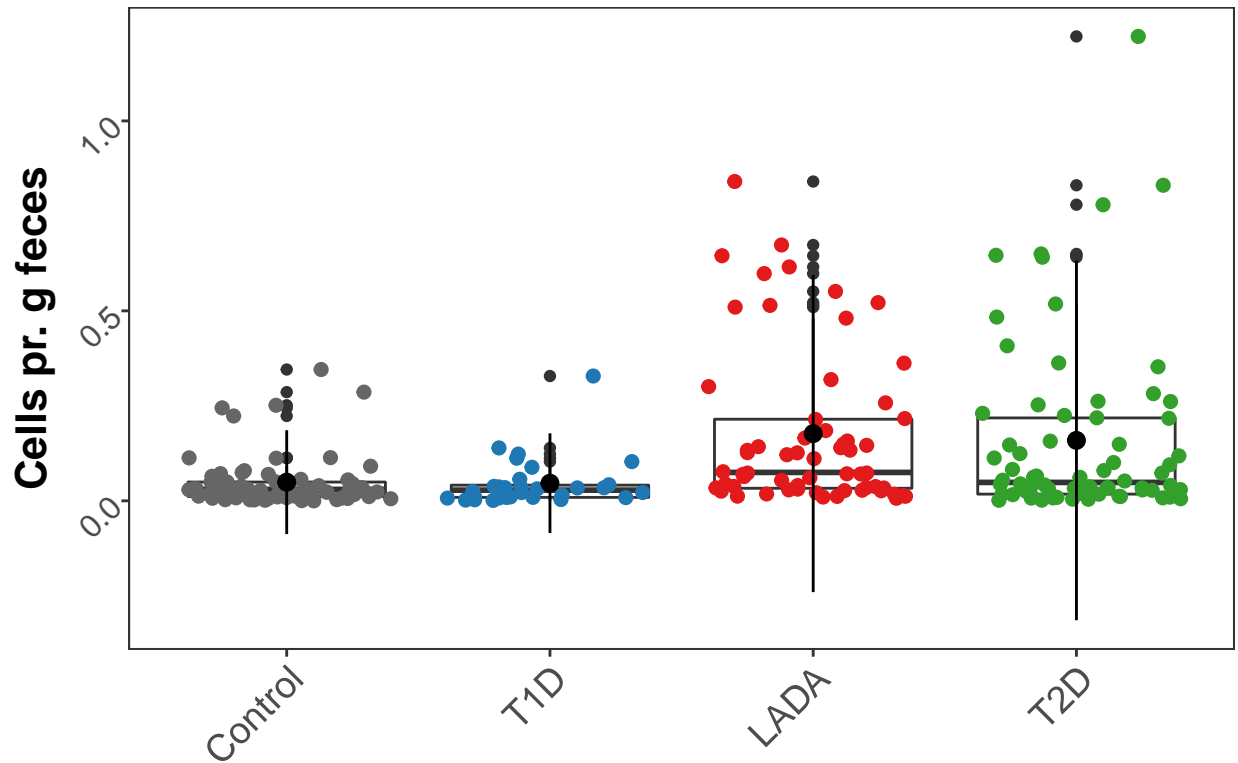

|      | pvalue    | padj      | Genus                             | compare         |
|------|-----------|-----------|-----------------------------------|-----------------|
| 555  | 0.0000000 | 0.0000000 | Geraniol_degradation_PATH_ko00281 | LADA vs Control |
| 358  | 0.0000000 | 0.0000001 | Geraniol_degradation_PATH_ko00281 | Control vs T2D  |
| 949  | 0.0000029 | 0.0001137 | Geraniol_degradation_PATH_ko00281 | LADA vs T1D     |
| 752  | 0.0000092 | 0.0003631 | Geraniol_degradation_PATH_ko00281 | T1D vs T2D      |
| 161  | 0.7095106 | 0.7991831 | Geraniol_degradation_PATH_ko00281 | Control vs T1D  |
| 1146 | 0.7841883 | 0.9521572 | Geraniol_degradation_PATH_ko00281 | LADA vs T2D     |



# Geraniol\_degradation\_PATH\_ko00281

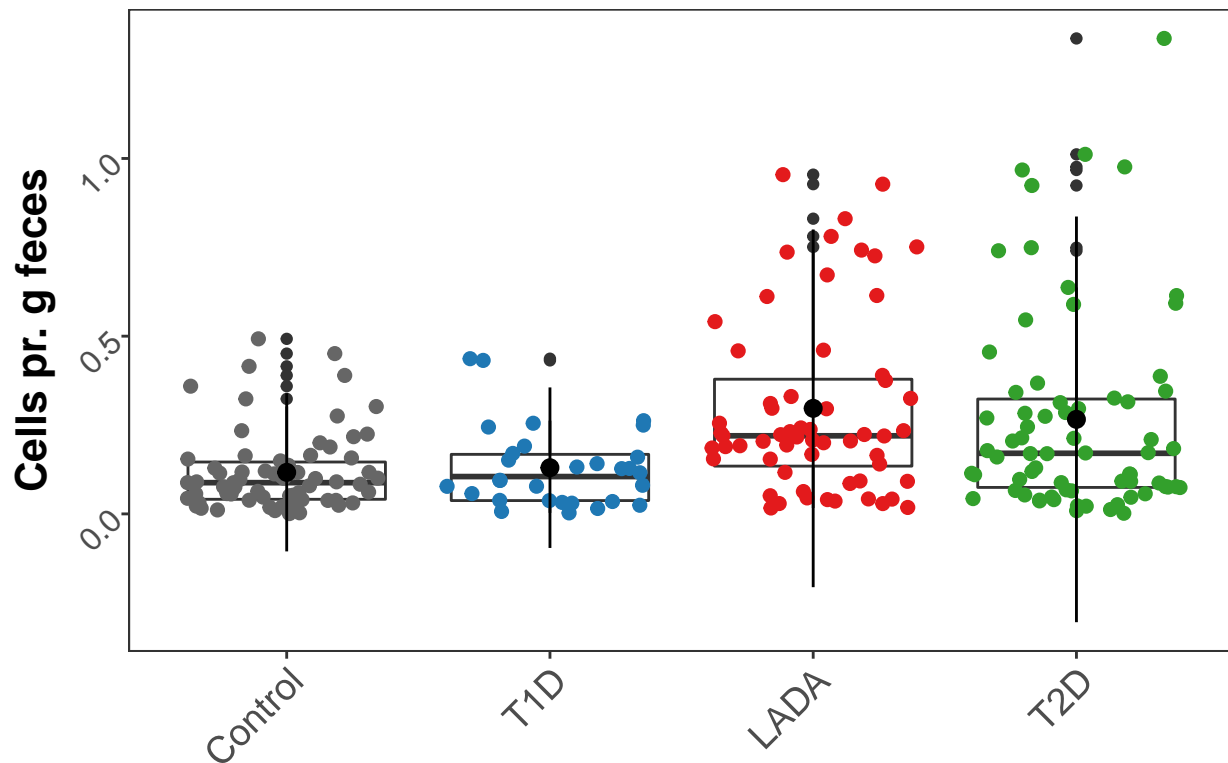

|      | pvalue    | padj      | Genus                                        | compare         |
|------|-----------|-----------|----------------------------------------------|-----------------|
| 515  | 0.0000000 | 0.0000000 | alpha_Linolenic_acid_metabolism_PATH_ko00592 | LADA vs Control |
| 318  | 0.0000000 | 0.0000001 | alpha_Linolenic_acid_metabolism_PATH_ko00592 | Control vs T2D  |
| 909  | 0.0000097 | 0.0003169 | alpha_Linolenic_acid_metabolism_PATH_ko00592 | LADA vs T1D     |
| 712  | 0.0000182 | 0.0005972 | alpha_Linolenic_acid_metabolism_PATH_ko00592 | T1D vs T2D      |
| 121  | 0.5263376 | 0.6912567 | alpha_Linolenic_acid_metabolism_PATH_ko00592 | Control vs T1D  |
| 1106 | 0.8871584 | 0.9763698 | alpha_Linolenic_acid_metabolism_PATH_ko00592 | LADA vs T2D     |

# alpha\_Linolenic\_acid\_metabolism\_PATH

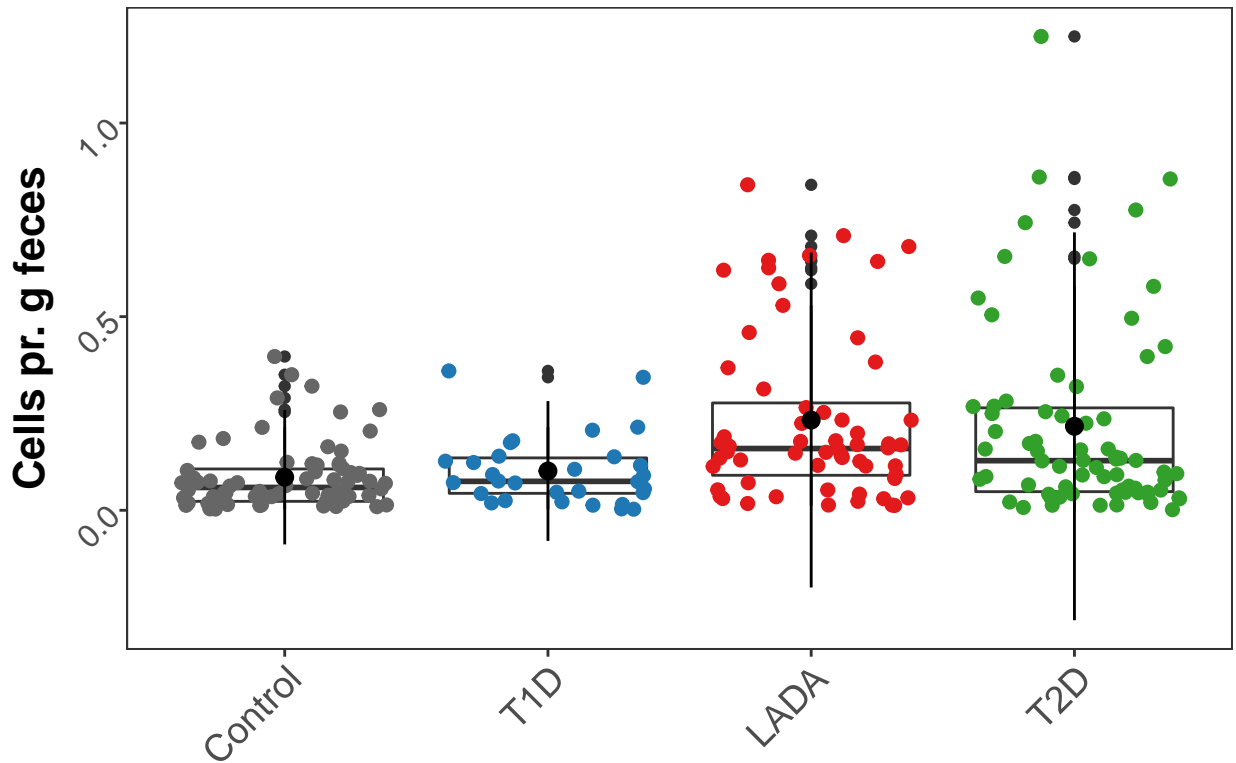

|      | pvalue    | padj      | Genus                               | compare         |
|------|-----------|-----------|-------------------------------------|-----------------|
| 321  | 0.0000000 | 0.0000000 | Ether_lipid_metabolism_PATH_ko00565 | Control vs T2D  |
| 518  | 0.0000000 | 0.0000002 | Ether_lipid_metabolism_PATH_ko00565 | LADA vs Control |
| 715  | 0.0000002 | 0.0000142 | Ether_lipid_metabolism_PATH_ko00565 | T1D vs T2D      |
| 912  | 0.0000023 | 0.0001137 | Ether_lipid_metabolism_PATH_ko00565 | LADA vs T1D     |
| 1109 | 0.5332483 | 0.9515738 | Ether_lipid_metabolism_PATH_ko00565 | LADA vs T2D     |
| 124  | 0.9727093 | 0.9826858 | Ether_lipid_metabolism_PATH_ko00565 | Control vs T1D  |

# Ether\_lipid\_metabolism\_PATH\_ko00565

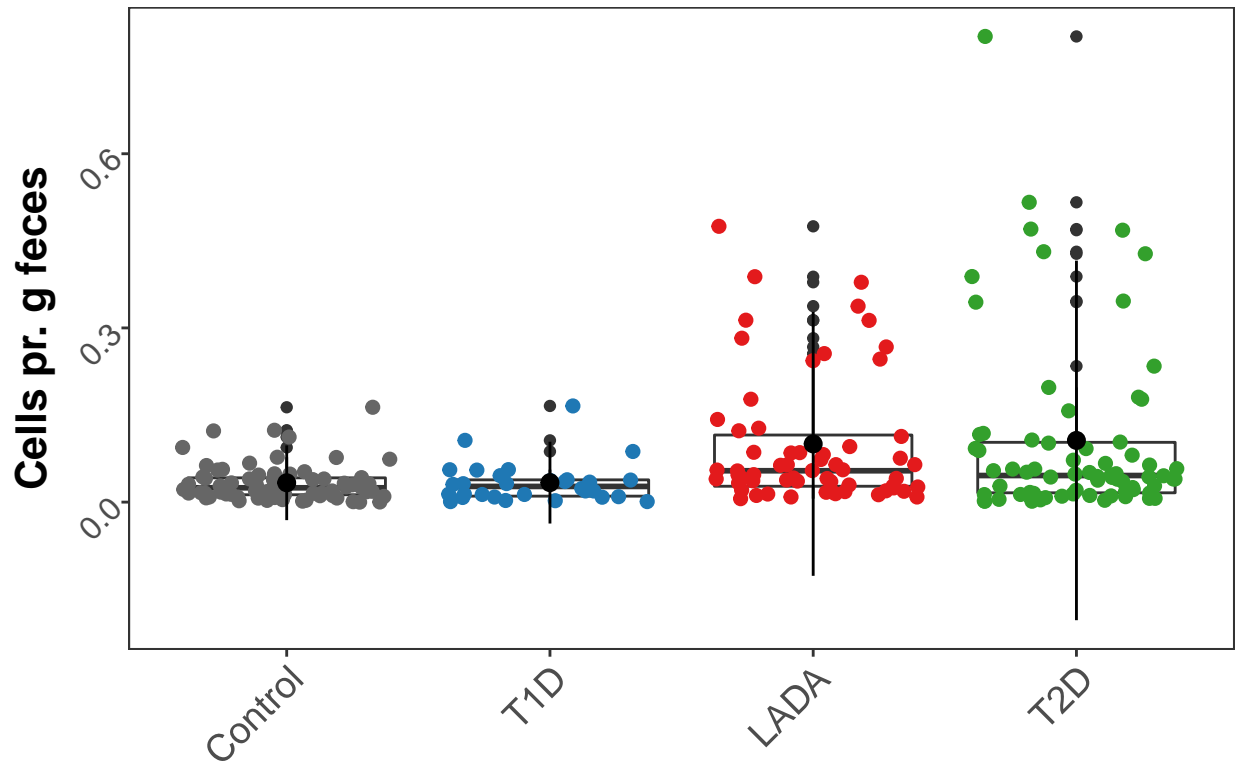

|      | pvalue    | padj      | Genus                            | compare         |
|------|-----------|-----------|----------------------------------|-----------------|
| 580  | 0.0000000 | 0.0000002 | Toluene_degradation_PATH_ko00623 | LADA vs Control |
| 383  | 0.0000001 | 0.0000033 | Toluene_degradation_PATH_ko00623 | Control vs T2D  |
| 974  | 0.0000010 | 0.0000673 | Toluene_degradation_PATH_ko00623 | LADA vs T1D     |
| 777  | 0.0000081 | 0.0003631 | Toluene_degradation_PATH_ko00623 | T1D vs T2D      |
| 186  | 0.8214088 | 0.8853256 | Toluene_degradation_PATH_ko00623 | Control vs T1D  |
| 1171 | 0.6160638 | 0.9515738 | Toluene_degradation_PATH_ko00623 | LADA vs T2D     |

# Toluene\_degradation\_PATH\_ko00623

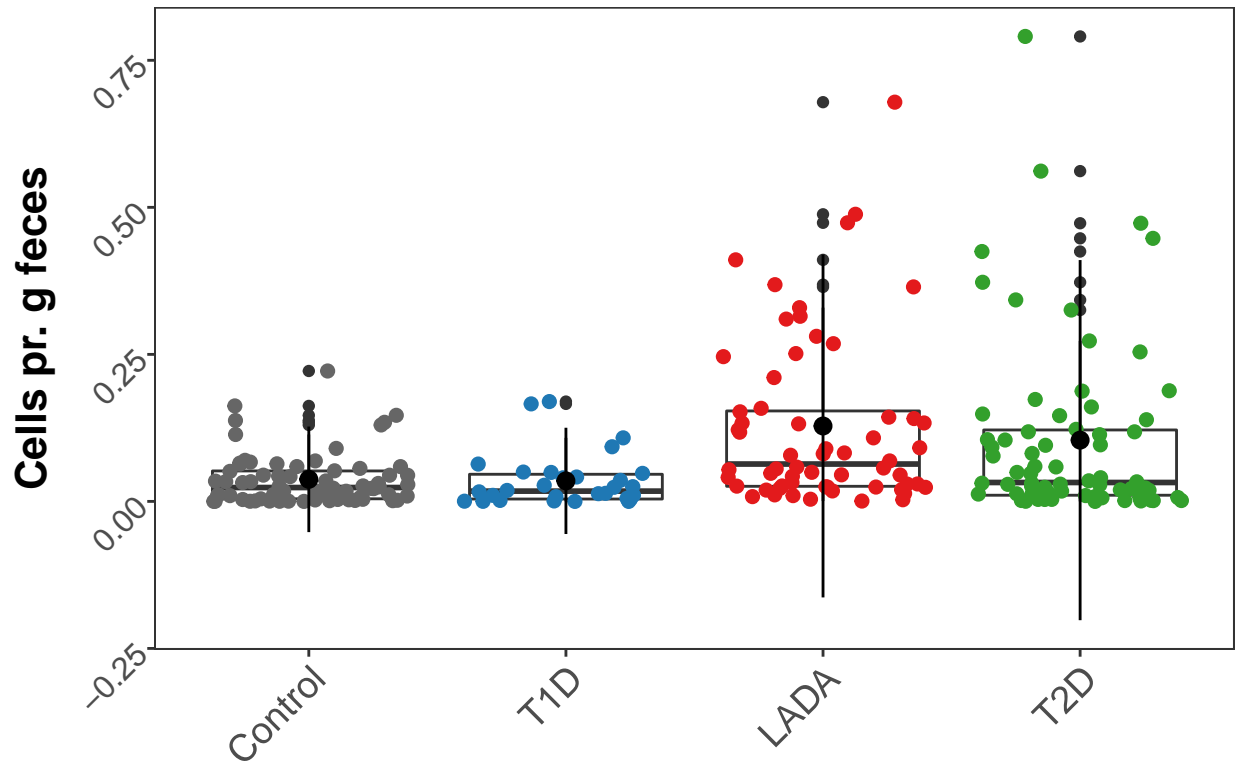

|      | pvalue    | padj      | Genus                                 | compare         |
|------|-----------|-----------|---------------------------------------|-----------------|
| 574  | 0.0000000 | 0.0000003 | Ethylbenzene_degradation_PATH_ko00642 | LADA vs Control |
| 377  | 0.0000001 | 0.0000033 | Ethylbenzene_degradation_PATH_ko00642 | Control vs T2D  |
| 968  | 0.0001706 | 0.0037353 | Ethylbenzene_degradation_PATH_ko00642 | LADA vs T1D     |
| 771  | 0.0005056 | 0.0110677 | Ethylbenzene_degradation_PATH_ko00642 | T1D vs T2D      |
| 180  | 0.4119094 | 0.5880155 | Ethylbenzene_degradation_PATH_ko00642 | Control vs T1D  |
| 1165 | 0.7425645 | 0.9515738 | Ethylbenzene_degradation_PATH_ko00642 | LADA vs T2D     |

# Ethylbenzene\_degradation\_PATH\_ko006

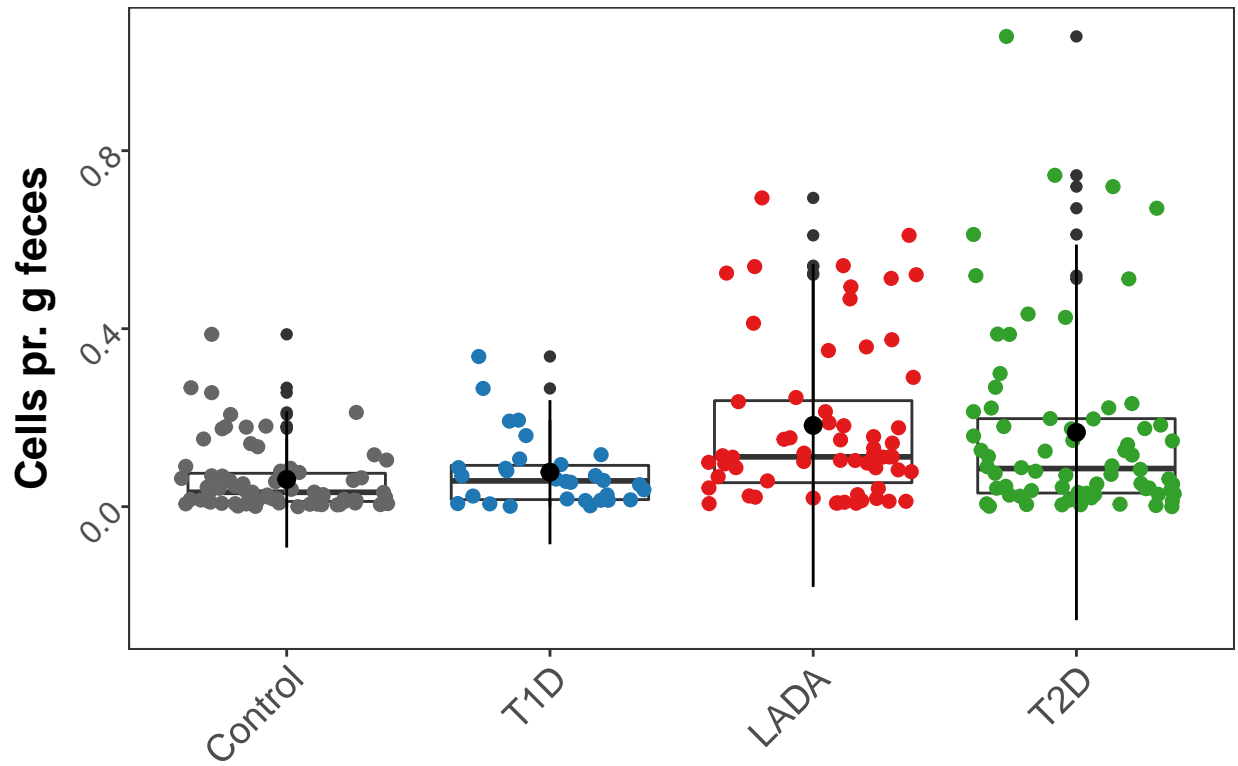

|      | pvalue    | padj      | Genus                              | compare         |
|------|-----------|-----------|------------------------------------|-----------------|
| 859  | 0.0000000 | 0.0000007 | Betalain_biosynthesis_PATH_ko00965 | LADA vs T1D     |
| 662  | 0.0000000 | 0.0000026 | Betalain_biosynthesis_PATH_ko00965 | T1D vs T2D      |
| 465  | 0.0000035 | 0.0000767 | Betalain_biosynthesis_PATH_ko00965 | LADA vs Control |
| 268  | 0.0000126 | 0.0002765 | Betalain_biosynthesis_PATH_ko00965 | Control vs T2D  |
| 71   | 0.0214920 | 0.3170574 | Betalain_biosynthesis_PATH_ko00965 | Control vs T1D  |
| 1056 | 0.8229511 | 0.9521572 | Betalain_biosynthesis_PATH_ko00965 | LADA vs T2D     |

# Betalain\_biosynthesis\_PATH\_ko00965

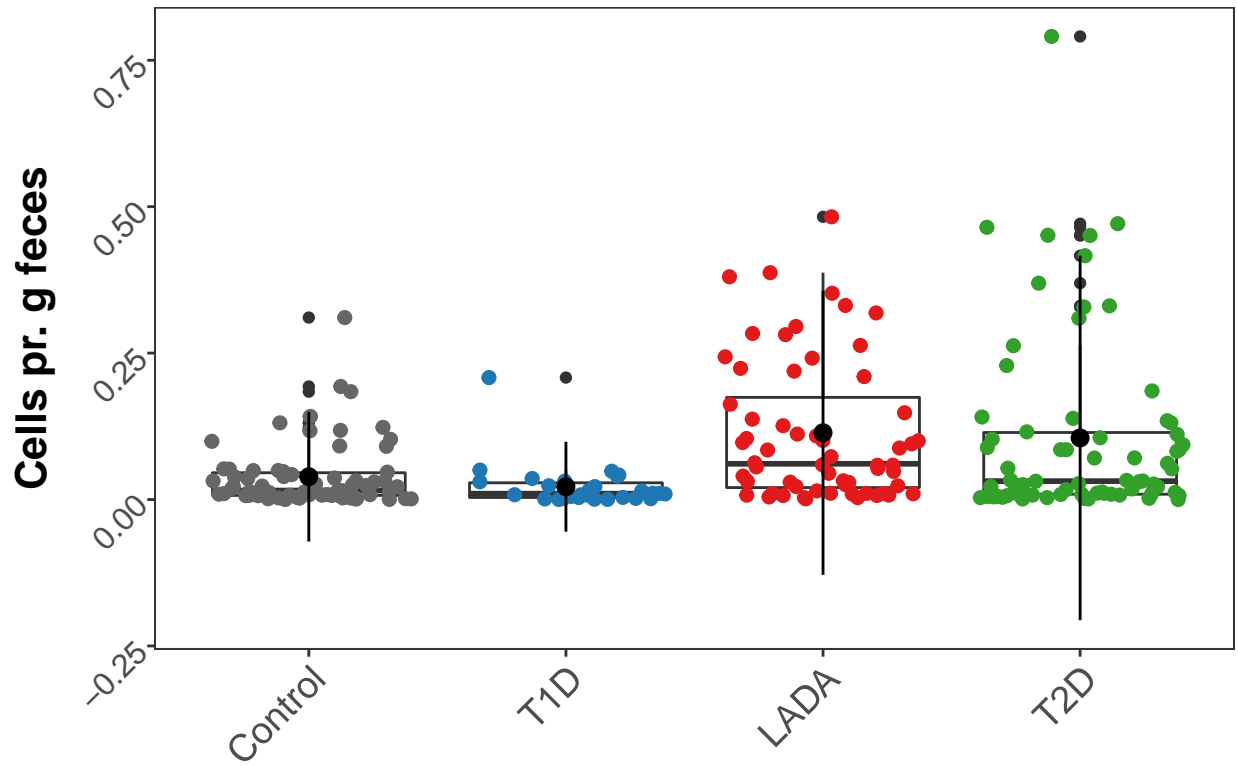

|      | pvalue    | padj      | Genus                                        | compare         |
|------|-----------|-----------|----------------------------------------------|-----------------|
| 572  | 0.0000004 | 0.0000101 | Drug_metabolism_cytochrome_P450_PATH_ko00965 | LADA vs Control |
| 375  | 0.0000065 | 0.0001841 | Drug_metabolism_cytochrome_P450_PATH_ko00965 | LADA vs T2D     |
| 966  | 0.0002368 | 0.0046652 | Drug_metabolism_cytochrome_P450_PATH_ko00965 | LADA vs T1D     |
| 769  | 0.0012164 | 0.0239621 | Drug_metabolism_cytochrome_P450_PATH_ko00965 | LADA vs T2D     |
| 178  | 0.7084203 | 0.7991831 | Drug_metabolism_cytochrome_P450_PATH_ko00965 | Control vs T1D  |
| 1163 | 0.5943236 | 0.9515738 | Drug_metabolism_cytochrome_P450_PATH_ko00965 | LADA vs T2D     |

# Drug\_metabolism\_\_cytochrome\_P450\_

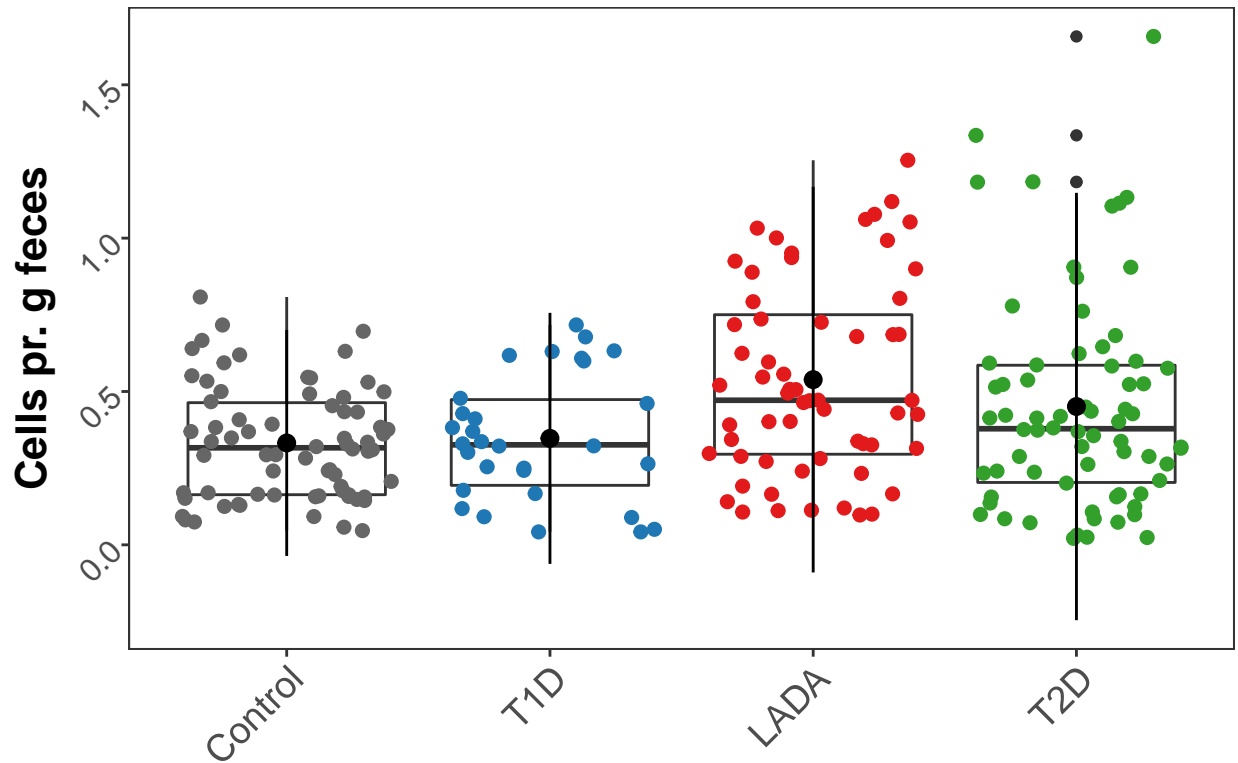

|      | pvalue    | padj      | Genus                                              | compare |
|------|-----------|-----------|----------------------------------------------------|---------|
| 576  | 0.0000004 | 0.0000106 | Metabolism_of_xenobiotics_by_cytochrome_P450_PATHL | Control |
| 379  | 0.0000078 | 0.0001914 | Metabolism_of_xenobiotics_by_cytochrome_P450_PATHC | T2D     |
| 970  | 0.0002618 | 0.0046880 | Metabolism_of_xenobiotics_by_cytochrome_P450_PATHL | T1D     |
| 773  | 0.0013380 | 0.0239621 | Metabolism_of_xenobiotics_by_cytochrome_P450_PATHT | T2D     |
| 182  | 0.7099343 | 0.7991831 | Metabolism_of_xenobiotics_by_cytochrome_P450_PATHC | T1D     |
| 1167 | 0.5927290 | 0.9515738 | Metabolism_of_xenobiotics_by_cytochrome_P450_PATHL | T2D     |

# Metabolism\_of\_xenobiotics\_by\_cytochrome

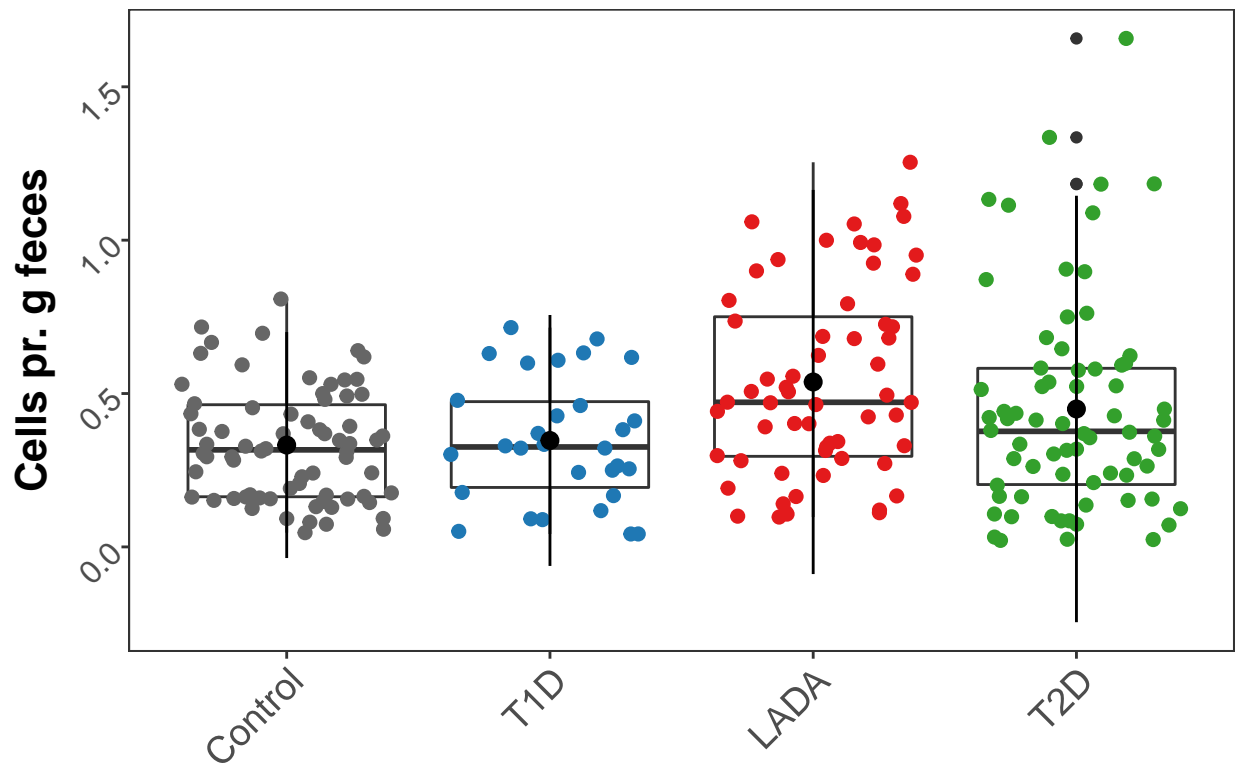

|      | pvalue    | padj      | Genus                                   | compare         |
|------|-----------|-----------|-----------------------------------------|-----------------|
| 378  | 0.0000263 | 0.0005176 | Fluorobenzoate_degradation_PATH_ko00364 | Control vs T2D  |
| 772  | 0.0000379 | 0.0010678 | Fluorobenzoate_degradation_PATH_ko00364 | T1D vs T2D      |
| 575  | 0.0001318 | 0.0023610 | Fluorobenzoate_degradation_PATH_ko00364 | LADA vs Control |
| 969  | 0.0001414 | 0.0034809 | Fluorobenzoate_degradation_PATH_ko00364 | LADA vs T1D     |
| 181  | 0.4226744 | 0.5990421 | Fluorobenzoate_degradation_PATH_ko00364 | Control vs T1D  |
| 1166 | 0.6673487 | 0.9515738 | Fluorobenzoate_degradation_PATH_ko00364 | LADA vs T2D     |



# Fluorobenzoate\_degradation\_PATH\_ko

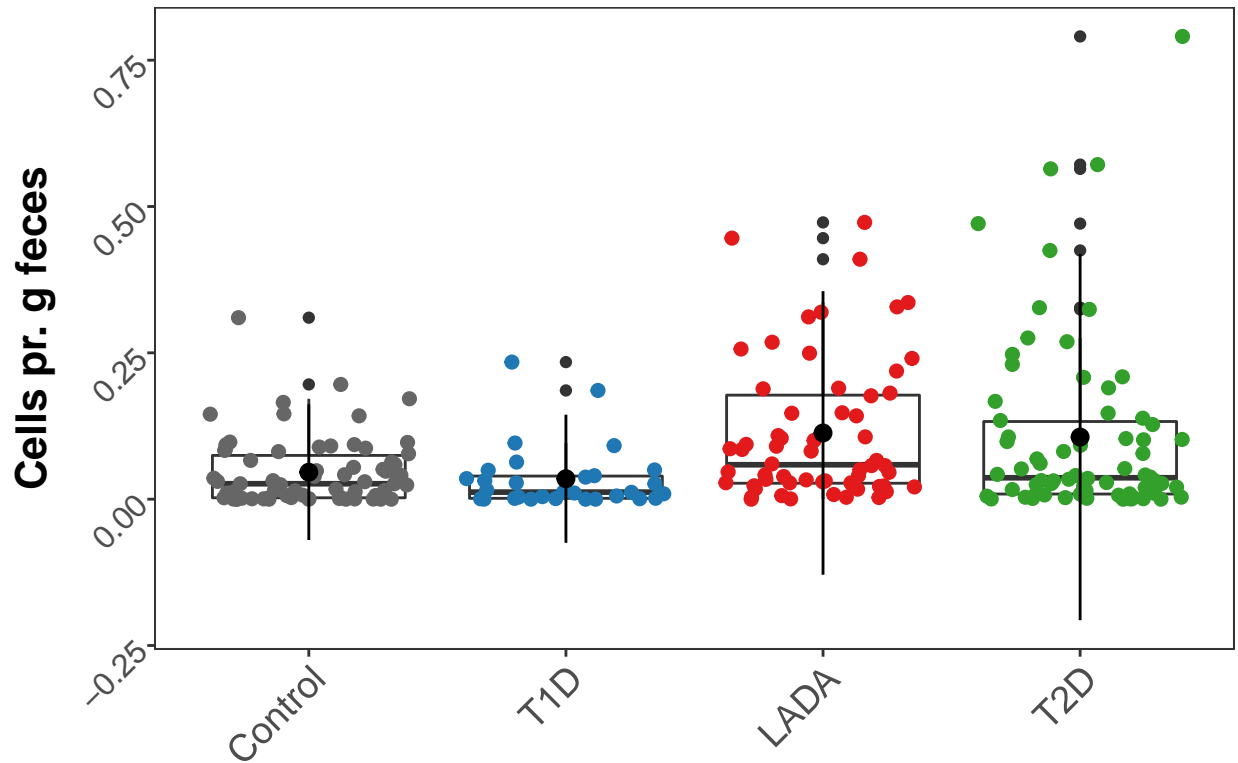

|      | pvalue    | padj      | Genus                          | compare                                   |
|------|-----------|-----------|--------------------------------|-------------------------------------------|
| 900  | 0.0000184 | 0.0005188 | Glycosphingolipid_biosynthesis | lacto_and_neolacto_series_LADA_vs_T1D     |
| 703  | 0.0003218 | 0.0079248 | Glycosphingolipid_biosynthesis | lacto_and_neolacto_series_T1D_vs_T2D      |
| 112  | 0.0078437 | 0.2321398 | Glycosphingolipid_biosynthesis | lacto_and_neolacto_series_Control_vs_T1D  |
| 506  | 0.0303540 | 0.2426050 | Glycosphingolipid_biosynthesis | lacto_and_neolacto_series_LADA_vs_Control |
| 309  | 0.1891414 | 0.8082167 | Glycosphingolipid_biosynthesis | lacto_and_neolacto_series_Control_vs_T2D  |
| 1097 | 0.4007451 | 0.9515738 | Glycosphingolipid_biosynthesis | lacto_and_neolacto_series_LADA_vs_T2D     |

# Glycosphingolipid\_biosynthesis\_\_\_lactc

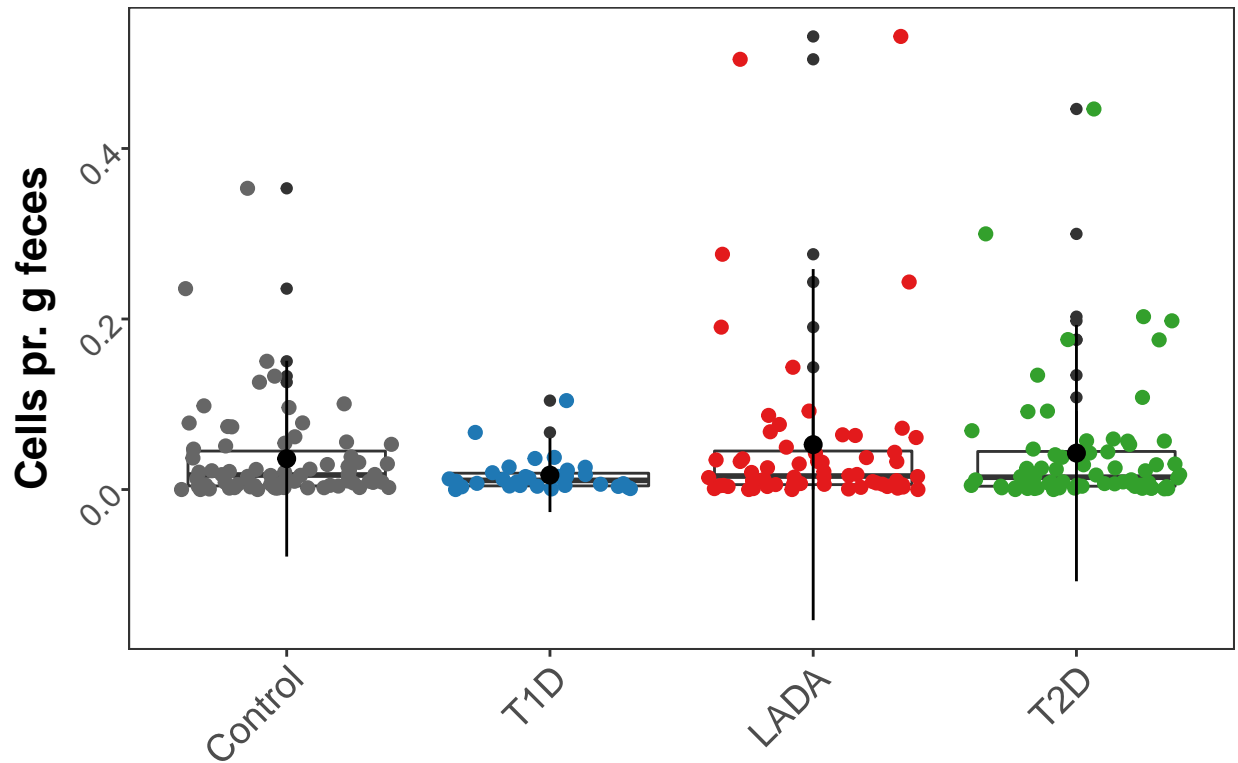

|      | pvalue    | padj      | Genus                                | compare         |
|------|-----------|-----------|--------------------------------------|-----------------|
| 554  | 0.0000575 | 0.0011323 | Carotenoid_biosynthesis_PATH_ko00906 | LADA vs Control |
| 357  | 0.0020193 | 0.0361635 | Carotenoid_biosynthesis_PATH_ko00906 | Control vs T2D  |
| 948  | 0.0186444 | 0.2346965 | Carotenoid_biosynthesis_PATH_ko00906 | LADA vs T1D     |
| 160  | 0.3852207 | 0.5663320 | Carotenoid_biosynthesis_PATH_ko00906 | Control vs T1D  |
| 751  | 0.1035017 | 0.6324066 | Carotenoid_biosynthesis_PATH_ko00906 | T1D vs T2D      |
| 1145 | 0.3661533 | 0.9515738 | Carotenoid_biosynthesis_PATH_ko00906 | LADA vs T2D     |

# Carotenoid\_biosynthesis\_PATH\_ko00900

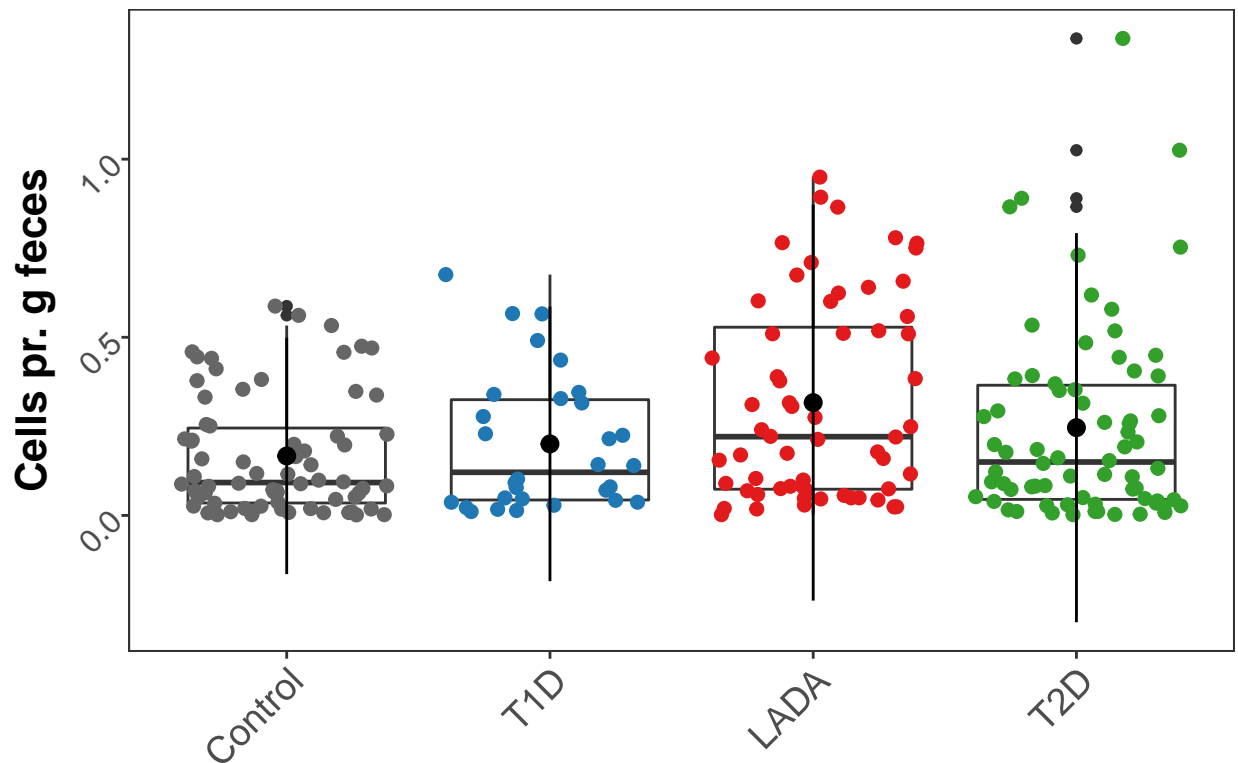

|      | pvalue    | padj      | Genus                           | compare         |
|------|-----------|-----------|---------------------------------|-----------------|
| 537  | 0.0008132 | 0.0133495 | Retinol_metabolism_PATH_ko00830 | LADA vs Control |
| 340  | 0.0301080 | 0.3954189 | Retinol_metabolism_PATH_ko00830 | Control vs T2D  |
| 931  | 0.1038239 | 0.4751596 | Retinol_metabolism_PATH_ko00830 | LADA vs T1D     |
| 143  | 0.2864287 | 0.5095493 | Retinol_metabolism_PATH_ko00830 | Control vs T1D  |
| 1128 | 0.2464473 | 0.9515738 | Retinol_metabolism_PATH_ko00830 | LADA vs T2D     |
| 734  | 0.4801648 | 0.9751541 | Retinol_metabolism_PATH_ko00830 | T1D vs T2D      |

# Retinol\_metabolism\_PATH\_ko00830

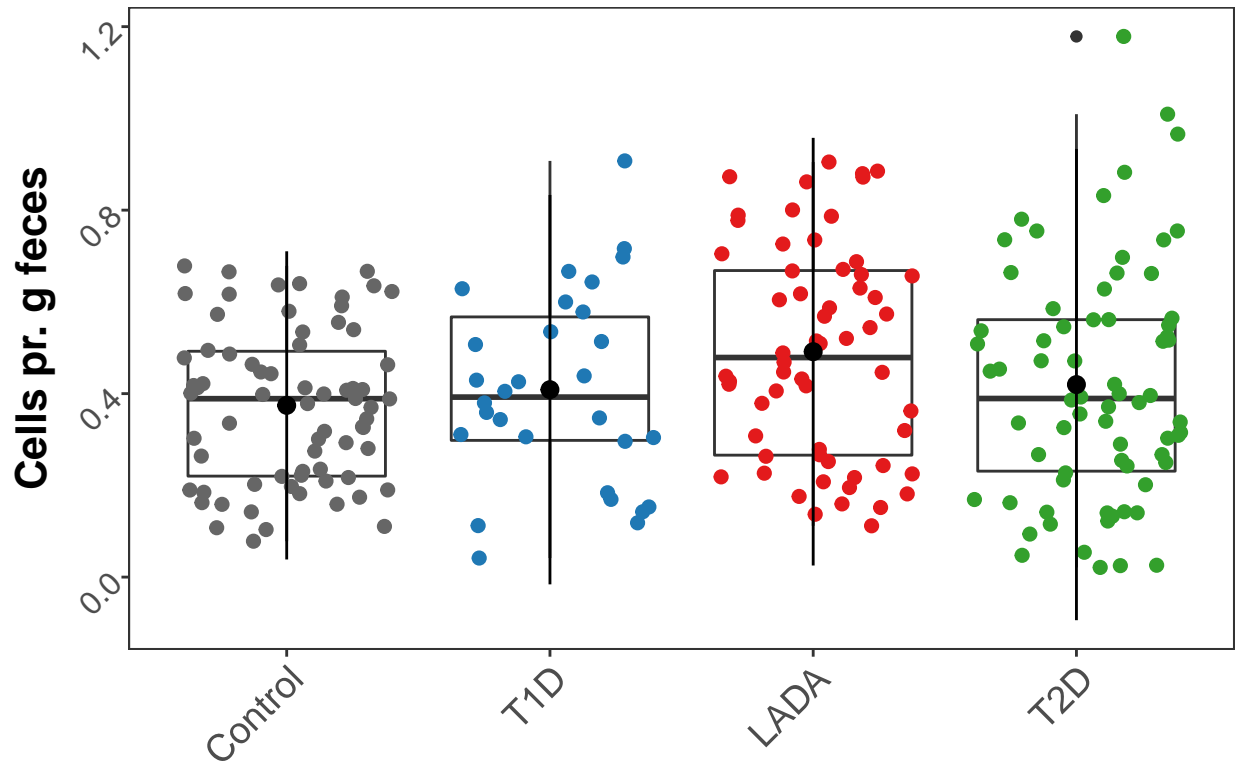

|     | pvalue    | padj      | Genus                             | compare         |
|-----|-----------|-----------|-----------------------------------|-----------------|
| 9   | 0.0001926 | 0.0359443 | Bacterial_chemotaxis_PATH_ko02030 | Control vs T1D  |
| 600 | 0.0048372 | 0.0733021 | Bacterial_chemotaxis_PATH_ko02030 | T1D vs T2D      |
| 403 | 0.0307874 | 0.2426050 | Bacterial_chemotaxis_PATH_ko02030 | LADA vs Control |
| 797 | 0.0591860 | 0.4318389 | Bacterial_chemotaxis_PATH_ko02030 | LADA vs T1D     |
| 206 | 0.3404387 | 0.8103002 | Bacterial_chemotaxis_PATH_ko02030 | Control vs T2D  |
| 994 | 0.2302161 | 0.9515738 | Bacterial_chemotaxis_PATH_ko02030 | LADA vs T2D     |

## Bacterial\_chemotaxis\_PATH\_ko02030

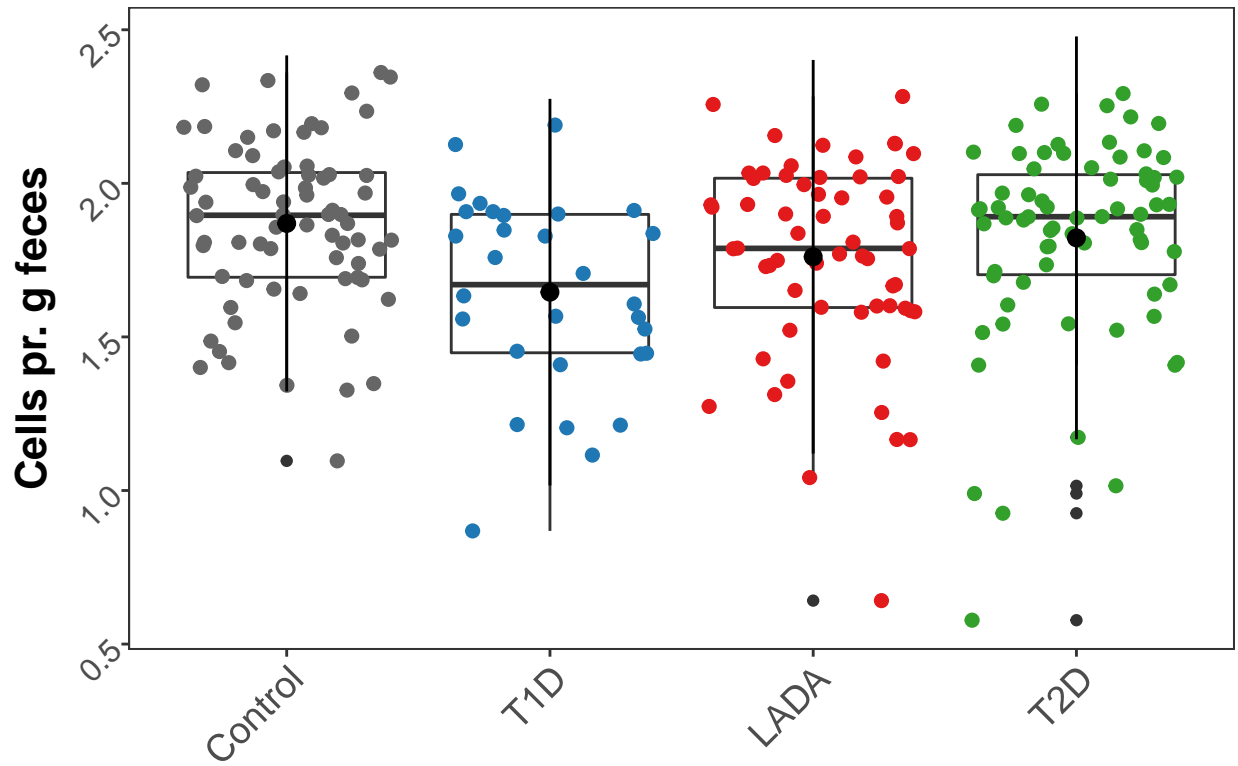

|     | pvalue    | padj      | Genus                           | compare         |
|-----|-----------|-----------|---------------------------------|-----------------|
| 10  | 0.0003649 | 0.0359443 | Flagellar_assembly_PATH_ko02040 | Control vs T1D  |
| 601 | 0.0080684 | 0.1059644 | Flagellar_assembly_PATH_ko02040 | T1D vs T2D      |
| 404 | 0.0504922 | 0.2910370 | Flagellar_assembly_PATH_ko02040 | LADA vs Control |
| 798 | 0.0587595 | 0.4318389 | Flagellar_assembly_PATH_ko02040 | LADA vs T1D     |
| 207 | 0.3336179 | 0.8103002 | Flagellar_assembly_PATH_ko02040 | Control vs T2D  |
| 995 | 0.3264398 | 0.9515738 | Flagellar_assembly_PATH_ko02040 | LADA vs T2D     |

# Flagellar\_assembly\_PATH\_ko02040

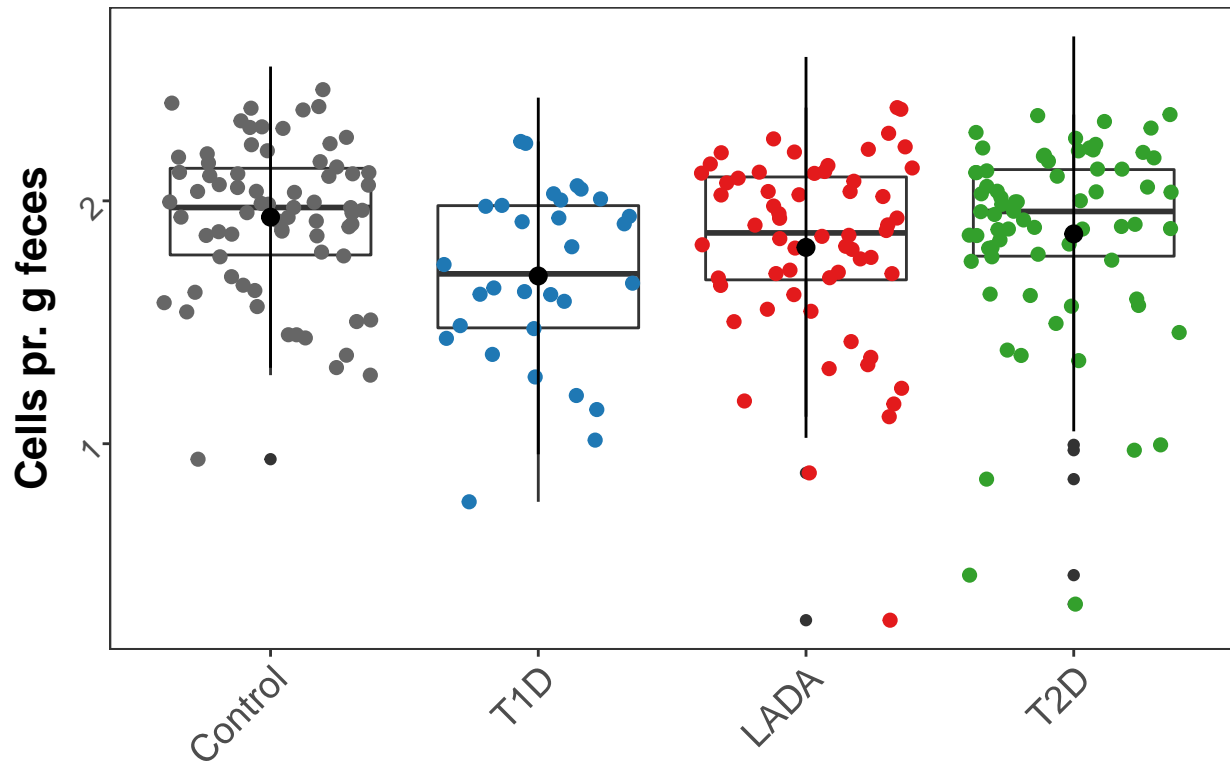

|     | pvalue    | padj      | Genus                                                 | compare        |
|-----|-----------|-----------|-------------------------------------------------------|----------------|
| 604 | 0.0038884 | 0.0638339 | Biofilm_formation_Pseudomonas_aeruginosa_PATH_ko02040 | T1D vs T2D     |
| 13  | 0.0082486 | 0.2321398 | Biofilm_formation_Pseudomonas_aeruginosa_PATH_ko02040 | Control vs T1D |
| 801 | 0.0222073 | 0.2430461 | Biofilm_formation_Pseudomonas_aeruginosa_PATH_ko02040 | T1D vs T2D     |
| 407 | 0.7394639 | 0.7707639 | Biofilm_formation_Pseudomonas_aeruginosa_PATH_ko02040 | Control vs T2D |
| 210 | 0.6585744 | 0.9438779 | Biofilm_formation_Pseudomonas_aeruginosa_PATH_ko02040 | Control vs T2D |
| 998 | 0.4341410 | 0.9515738 | Biofilm_formation_Pseudomonas_aeruginosa_PATH_ko02040 | Control vs T2D |

# Biofilm\_formation\_\_\_Pseudomonas\_aer

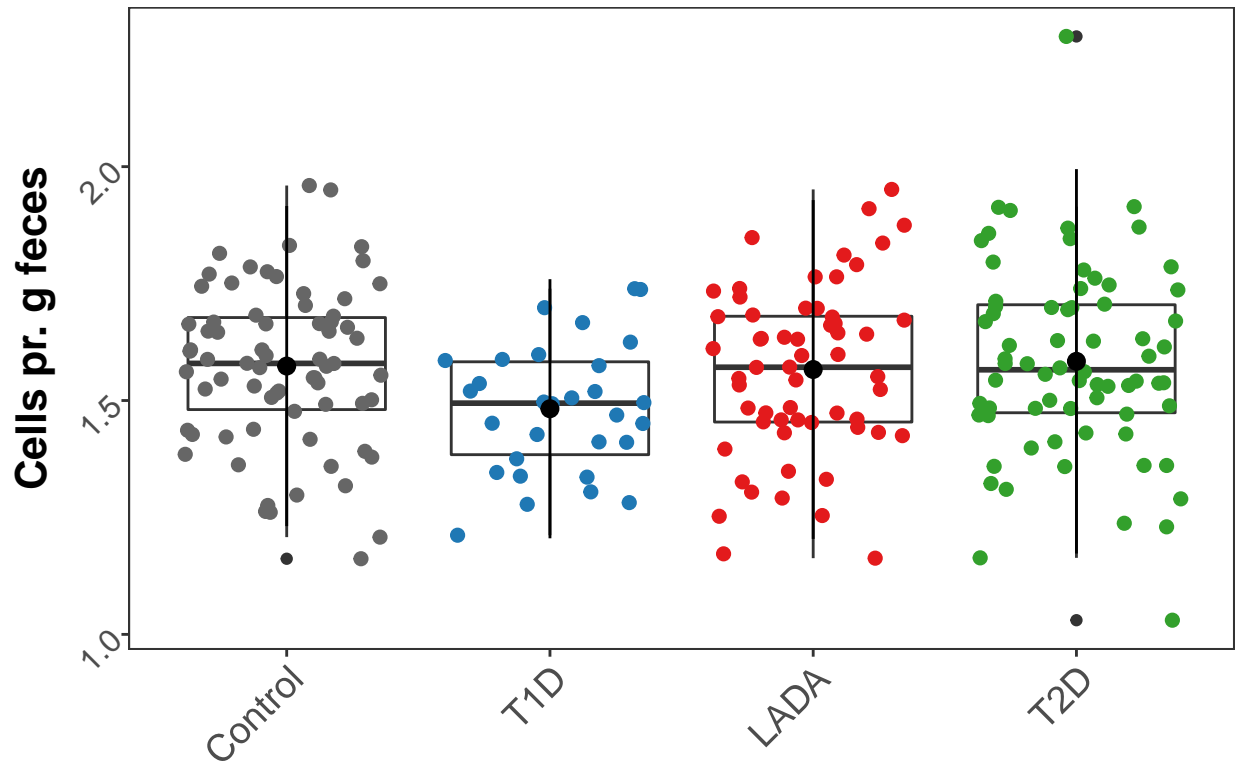

|      | pvalue    | padj      | Genus                                          | compare         |
|------|-----------|-----------|------------------------------------------------|-----------------|
| 842  | 0.0048382 | 0.0794274 | Ribosome_biogenesis_in_eukaryotes_PATH_ko03000 | LADA vs T1D     |
| 645  | 0.0326435 | 0.3215380 | Ribosome_biogenesis_in_eukaryotes_PATH_ko03000 | T1D vs T2D      |
| 54   | 0.0345688 | 0.3474094 | Ribosome_biogenesis_in_eukaryotes_PATH_ko03000 | Control vs T1D  |
| 448  | 0.3271977 | 0.4786823 | Ribosome_biogenesis_in_eukaryotes_PATH_ko03000 | LADA vs Control |
| 1039 | 0.3981702 | 0.9515738 | Ribosome_biogenesis_in_eukaryotes_PATH_ko03000 | LADA vs T2D     |
| 251  | 0.8916443 | 0.9946959 | Ribosome_biogenesis_in_eukaryotes_PATH_ko03000 | Control vs T2D  |

# Ribosome\_biogenesis\_in\_eukaryotes\_P

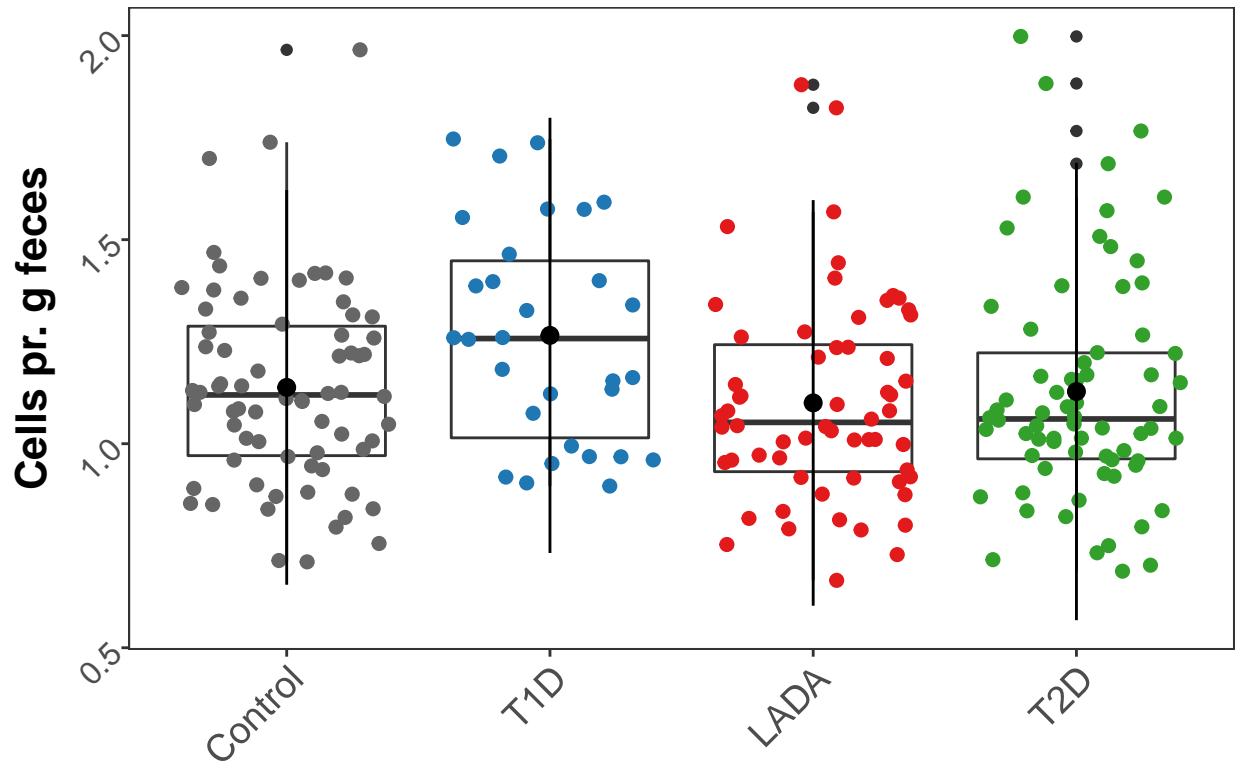

|      | pvalue    | padj      | Genus                                   | compare         |
|------|-----------|-----------|-----------------------------------------|-----------------|
| 586  | 0.0064082 | 0.0903513 | Biosynthesis_of_terpenoids_and_steroids | LADA vs Control |
| 192  | 0.3967237 | 0.5746660 | Biosynthesis_of_terpenoids_and_steroids | Control vs T1D  |
| 980  | 0.1789222 | 0.6535682 | Biosynthesis_of_terpenoids_and_steroids | LADA vs T1D     |
| 389  | 0.1431341 | 0.8082167 | Biosynthesis_of_terpenoids_and_steroids | Control vs T2D  |
| 1177 | 0.2114413 | 0.9515738 | Biosynthesis_of_terpenoids_and_steroids | LADA vs T2D     |
| 783  | 0.7232565 | 0.9781873 | Biosynthesis_of_terpenoids_and_steroids | T1D vs T2D      |



# Biosynthesis\_of\_terpenoids\_and\_steroid

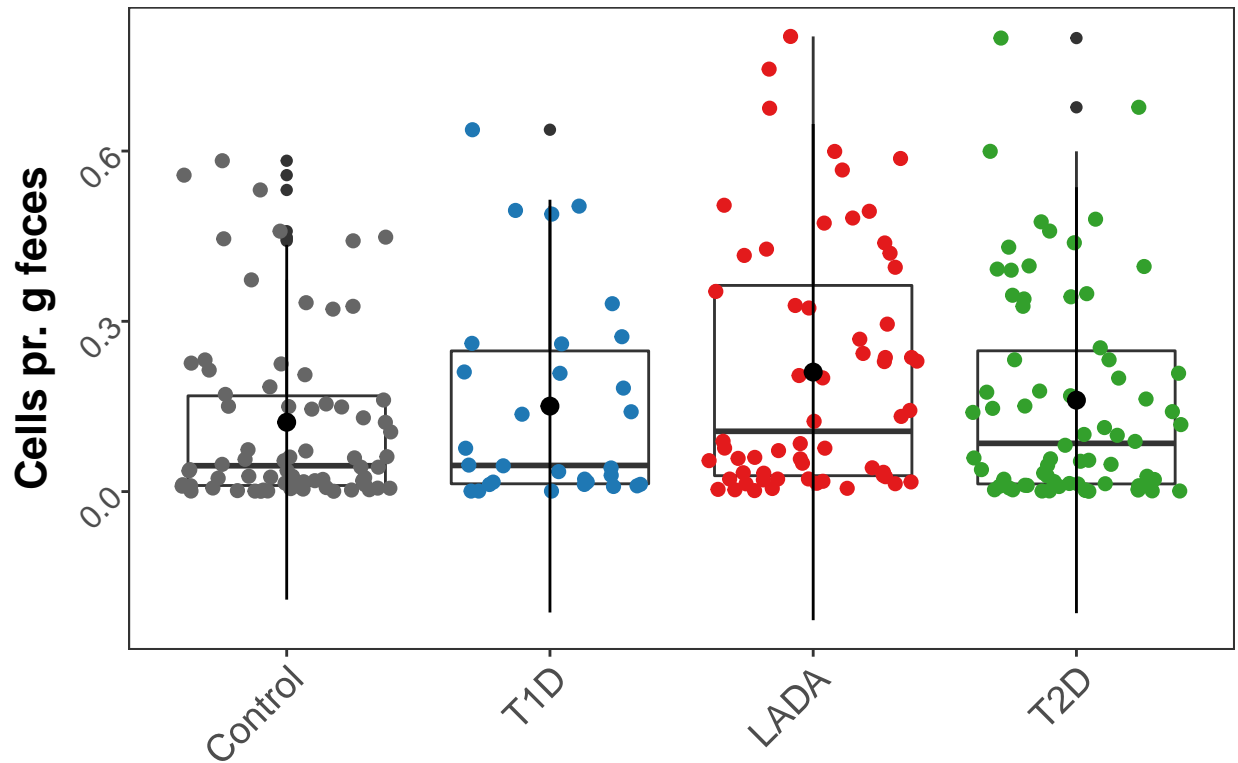

|      | pvalue    | padj      | Genus                                    | compare         |
|------|-----------|-----------|------------------------------------------|-----------------|
| 516  | 0.0064209 | 0.0903513 | Arachidonic_acid_metabolism_PATH_ko00590 | LADA vs Control |
| 319  | 0.0074259 | 0.1219090 | Arachidonic_acid_metabolism_PATH_ko00590 | Control vs T2D  |
| 910  | 0.1061270 | 0.4751596 | Arachidonic_acid_metabolism_PATH_ko00590 | LADA vs T1D     |
| 713  | 0.1114670 | 0.6324066 | Arachidonic_acid_metabolism_PATH_ko00590 | T1D vs T2D      |
| 122  | 0.5717637 | 0.7139235 | Arachidonic_acid_metabolism_PATH_ko00590 | Control vs T1D  |
| 1107 | 0.9855521 | 0.9959905 | Arachidonic_acid_metabolism_PATH_ko00590 | LADA vs T2D     |

# Arachidonic\_acid\_metabolism\_PATH\_ko

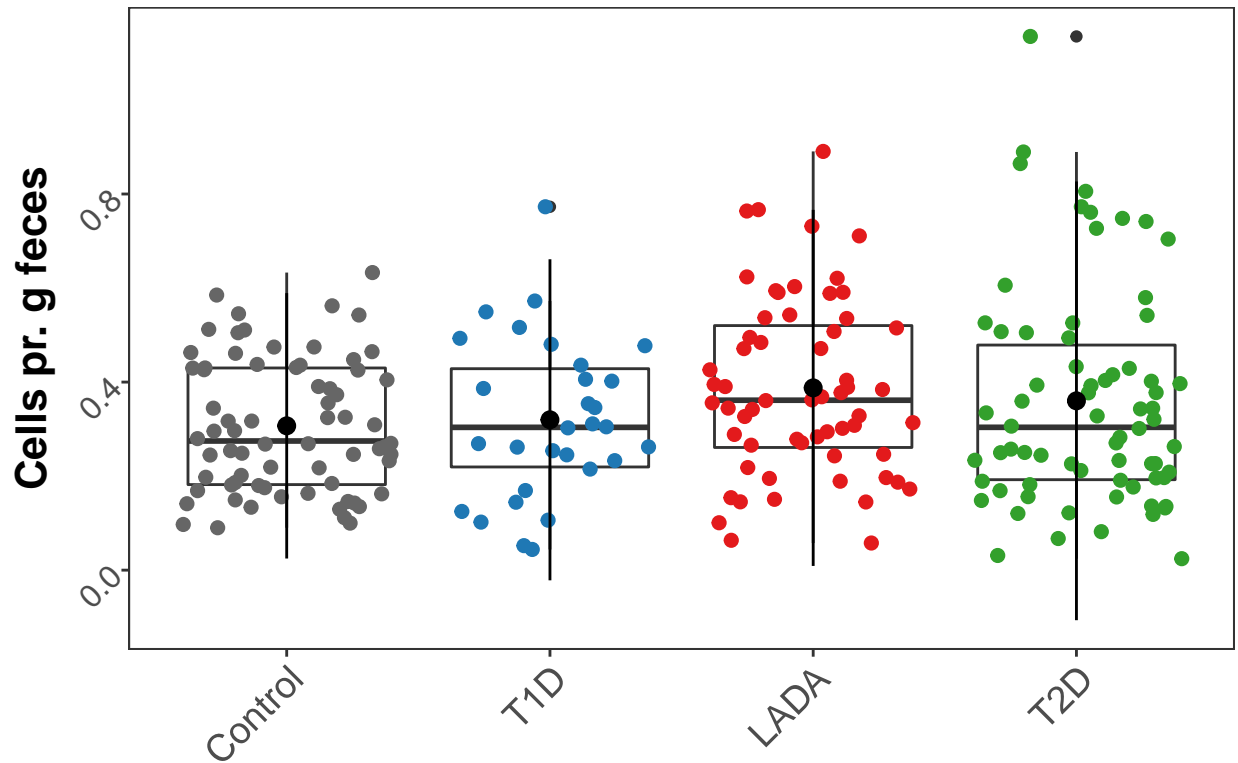

|     | pvalue    | padj      | Genus                              | compare         |
|-----|-----------|-----------|------------------------------------|-----------------|
| 402 | 0.0069920 | 0.0918277 | p53_signaling_pathway_PATH_ko04115 | LADA vs Control |
| 796 | 0.0258031 | 0.2541601 | p53_signaling_pathway_PATH_ko04115 | LADA vs T1D     |
| 205 | 0.0419884 | 0.5169818 | p53_signaling_pathway_PATH_ko04115 | Control vs T2D  |
| 599 | 0.0870940 | 0.6324066 | p53_signaling_pathway_PATH_ko04115 | T1D vs T2D      |
| 8   | 0.9248012 | 0.9488846 | p53_signaling_pathway_PATH_ko04115 | Control vs T1D  |
| 993 | 0.5207974 | 0.9515738 | p53_signaling_pathway_PATH_ko04115 | LADA vs T2D     |

## p53\_signaling\_pathway\_PATH\_ko04115

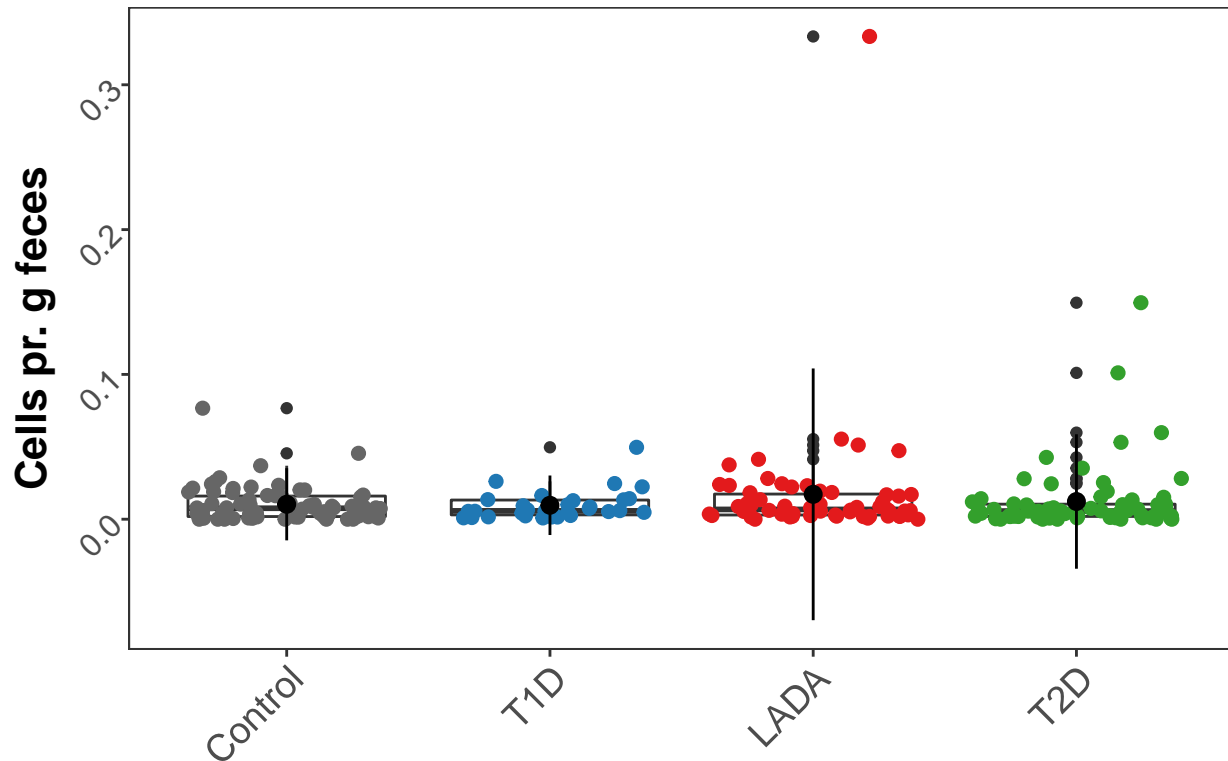

```
lay <- rbind(c(1,2,3))
pdf(paste("MicroLADA_FuncDA.pdf", sep=""), width=15, height=5)
grid.arrange(Fig2List$Geraniol_degradation_PATH_ko00281,
              Fig2List$Carotenoid_biosynthesis_PATH_ko00906,
              Fig2List$Retinol_metabolism_PATH_ko00830,layout_matrix = lay)
dev.off()
```

pdf 2

```
#ggplot(Plotting2, aes(x=BMI, y=Actinomyces)) +
# geom_point()
```

### DESeq Wald Remove metformin

All pairwise Differential abundance analysis comparison (DESeq and visualized venn)

```
rm(list=setdiff(ls(), c("Metadata", "MetadataMed", "Feature", "TaxonomyDA", "Taxonomy", "Fig2List")))
#Create a list to hold the plot objects.
Fig2ListRemMet <- list()

#Reassign names
#Metadata2<-Metadata
Taxonomy2<-TaxonomyDA
```

```

##Removing treated with metformin
#Metadata$Metformin <- ifelse(is.na(Metadata$Metformin), "Unknow", Metadata$Metformin)
Metadata2<-filter(Metadata, !Metformin == 1)
##Applying subsetting to OTU tables
Taxonomy2<-dplyr::select(Taxonomy2, one_of(as.character(Metadata2$MicrobiomeID)))
##Remove orgs that are not present after subsetting.
Taxonomy2 <- Taxonomy2[rowSums(Taxonomy2)>0,]

#Order Diagnosis
Metadata2$Diagnosis<-ordered(Metadata2$Diagnosis,
                             levels=c("Control", "T1D", "T2D", "LADA"))
#The factor can not be ordered for DESeq to run
Metadata2$Diagnosis<-factor(Metadata2$Diagnosis, ordered=FALSE)

#Create design formula
design <- formula(paste("~ ", "Diagnosis")) #To be consistent the analysis with metformin
#removed is always without correcting for BMI
#design <- formula(paste("~ ", "Diagnosis", "+", "BMIq"))
#design <- formula(paste("~ ", "Diagnosis", "+ Metformin"))
#Create DESeq2 object with matrix and metadata
dds <- DESeqDataSetFromMatrix(countData = Taxonomy2,
                              colData = Metadata2,
                              design = design)

##Assess and calculate size factors using the different methods
SF<-data.frame(Ratio=sizeFactors(estimateSizeFactors(dds, type="ratio")),
              Poscounts=sizeFactors(estimateSizeFactors(dds, type="poscounts")),
              # "iterate" takes a lot of time changed to "poscounts" but kept due to the
              # following code
              Iterate=sizeFactors(estimateSizeFactors(dds, type="poscounts")),
              Relative=colSums(Taxonomy2)/mean(colSums(Taxonomy2))
              )
SF<-add_rownames(SF, var="MicrobiomeID")
#Adding total abundances
# old path path<-paste("Q:/",
#                       "Projects/",
#                       "LADA/",
#                       "LADA_Sandra_Evelina/",
#                       "LADA_JKV/",
#                       "LADA_R_AfterFlow_Analysis_FinalCounts/",
#                       "LADA_FinalCounts/",
#                       "2019-09-03_CountAnalysis.rds", sep="")

path <- paste("J:/",
              "CBMR/",
              "SUN-CBMR-Hansen-Group/",
              "Projects/",
              "LADA/",
              "LADA_Sandra_Evelina/",

```

```

    "LADA_JKV/",
    "LADA_R_AfterFlow_Analysis_FinalCounts/",
    "LADA_FinalCounts/",
    "2019-09-03_CountAnalysis.rds", sep="")

TotalCounts<-readRDS(path)
TotalCountsProcess <-
  data.frame(MicrobiomeID=TotalCounts$DF_Save_w$ID,
             CellNorm=TotalCounts$DF_Save_w$Cells_per_g_feces_FR_corrected_mean)
TotalCountsProcess$MicrobiomeID <- paste("L", TotalCountsProcess$MicrobiomeID,
                                         sep="")
SF2<-merge(SF, TotalCountsProcess, by="MicrobiomeID")

#One value is NaN in sample 602059 assigns value as average
SF2$CellNorm[is.nan(SF2$CellNorm)]<-mean(na.omit(SF2$CellNorm))

SF2$CellNormStand<-SF2$CellNorm/mean(SF2$CellNorm) #Watch out for NaN values can assign
#average, but wants the error

SF3<-merge(Metadata2, SF2, by="MicrobiomeID")
#DESeq divides with sizeFactor (High cell count should have low sizeFactor providing
#larger counts in a sample)
#Still have to consider seq data is relative
SF3$NormRelCell<-SF3$Relative/SF3$CellNormStand
#Overview of normalization factors
aggregate(SF3[, 14:20], list(SF3$Diagnosis), mean) #Have to run heatmap chunk adding sex

Group.1 Ratio Poscounts Iterate Relative CellNorm CellNormStand 1 Control 1.094542 1.087591 1.087591
1.0032044 20384275367 1.0722125 2 T1D 1.131654 1.127744 1.127744 1.0416740 18731782275 0.9852914 3
T2D 1.069550 1.065472 1.065472 0.9806434 16982538343 0.8932812 4 LADA 1.004481 0.998413 0.998413
0.9142228 15590817082 0.8200767 NormRelCell 1 1.002356 2 1.193649 3 1.191757 4 1.193676

                                     #to metadata
aggregate(SF3[, 14:20], list(SF3$Diagnosis), sd)

Group.1 Ratio Poscounts Iterate Relative CellNorm CellNormStand 1 Control 0.4695326 0.4639309
0.4639309 0.4337118 6781846681 0.3567250 2 T1D 0.4106770 0.4065139 0.4065139 0.3886448 5712095609
0.3004561 3 T2D 0.3912487 0.3857159 0.3857159 0.3582493 4888235680 0.2571211 4 LADA 0.3345323
0.3282978 0.3282978 0.3071066 4604942130 0.2422199 NormRelCell 1 0.4688179 2 0.6676588 3 0.5509790 4
0.5263781

pairs(SF3[, c(14:17,19,20)], col=SF3$Diagnosis)

```

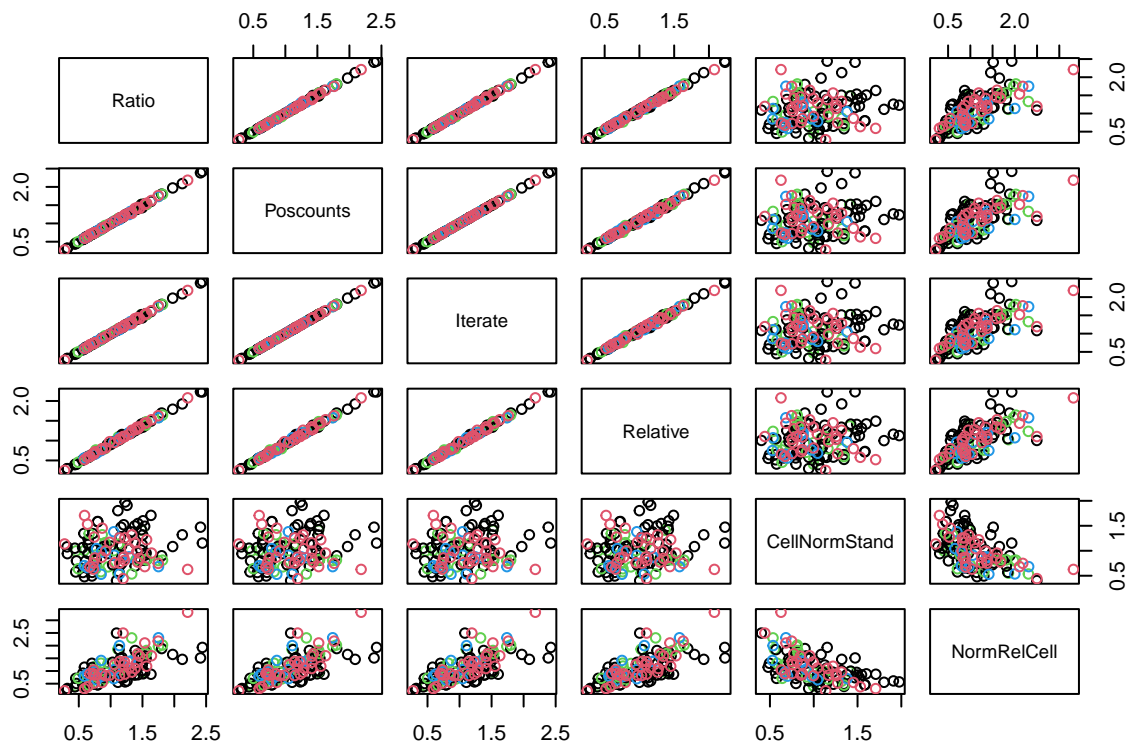

```
pairs(SF3[, c(15,17,19,20)], col=SF3$Diagnosis)
```

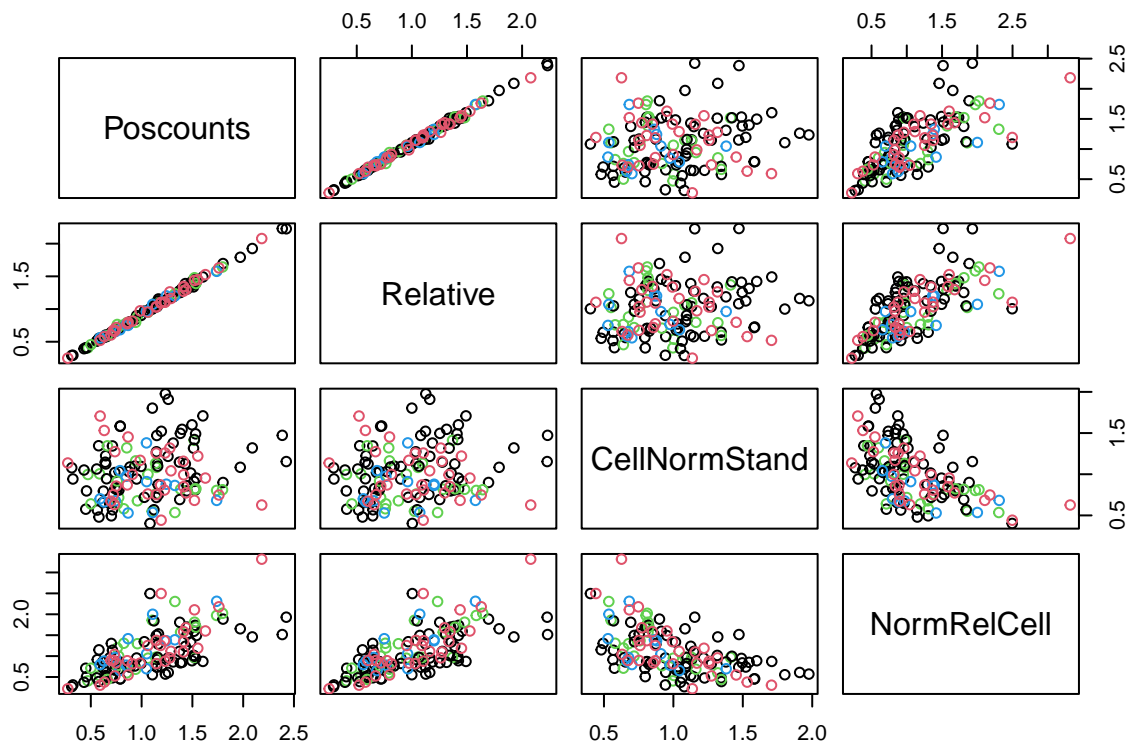

```

#I do want CellNormStand and NormRelCell to be negatively correlated due to DESeq divide
#with sizeFactor.
#It is also good that CellNormStand seems uncorrelated to the other normalization factors.

##Select size factors calculated above for normalization
dds@colData@listData$sizeFactor <- SF3[,20]

##See vignette for note on factor levels
#Filtering of the Counttable. Bare minimum is performed later. Also to reduce memory of
#the dds
dds <- dds[ rowSums(counts(dds))>(50*length(Taxonomy2)),] #Previously 0 instead of 1

#Estimate dispersions and fit the GLM
dds <- DESeq(dds)

res<-results(dds)
summary(res)

```

out of 196 with nonzero total read count adjusted p-value < 0.1 LFC > 0 (up) : 10, 5.1% LFC < 0 (down)  
: 109, 56% outliers [1] : 0, 0% low counts [2] : 0, 0% (mean count < 62) [1] see 'cooksCutoff' argument of  
?results [2] see 'independentFiltering' argument of ?results

```
resultsNames(dds)
```

[1] "Intercept" "Diagnosis\_T1D\_vs\_Control" [3] "Diagnosis\_T2D\_vs\_Control" "Diagnosis\_LADA\_vs\_Control"

```

#Threshold for FDR-adjusted p-values
padj_threshold <- 0.1

if (is.factor(colData(dds)[,"Diagnosis"]) == TRUE) {

#Find all two-wise combinations of levels in chosen test factor
test <- combn(levels(colData(dds)[,"Diagnosis"]), 2)
test[,3]<-c("LADA", "Control") #Want LADA first
test[,5]<-c("LADA", "T1D") #Want LADA first
test[,6]<-c("LADA", "T2D") #Want LADA first
foo = test[1,]
poo = test[2,]

#Do DESeq2 analysis on all combinations of levels and save as list
result <- vector("list",length(foo))
for (i in 1:length(foo) ) {
  for (j in 1:length(poo)) {
    result[i] = results(dds, contrast = c("Diagnosis" ,foo[i], poo[i]))
  }
}

#Produce output tables with significant taxa from each comparison
res_list <- vector("list",length(foo))
for (i in 1:length(result) ) {
  res_stat <- data.frame(result[i])
  res_stat <- res_stat[is.na(res_stat$pvalue) == FALSE,]
  stat_sig <- na.omit(res_stat[res_stat$padj < padj_threshold,])
  res_stat$gene <- rownames(res_stat)
  res_stat$g1 <- test[1,i]
  res_stat$g2 <- test[2,i]
  res_stat$compare <- paste(test[1,i], "vs", test[2,i])
  res_list[i] <- list(res_stat)
}

res_stat <- do.call('rbind', res_list)
rownames(res_stat) <- 1:nrow(res_stat)
res_stat <- res_stat[with(res_stat, order(padj, pvalue, abs(log2FoldChange))),]
stat_sig <- na.omit(res_stat[res_stat$padj < padj_threshold,])
}

if (is.numeric(colData(dds)[,"Diagnosis"]) == TRUE) {

res_stat <- data.frame((results(dds)))
res_stat$maxCooks <- apply(assays(dds)[["cooks"]], 1, max)
res_stat <- res_stat[is.na(res_stat$pvalue) == FALSE,]
res_stat <- res_stat[with(res_stat, order(padj, pvalue, abs(log2FoldChange))), ]
res_stat$gene <- rownames(res_stat)
max_cooks <- quantile(na.omit(res_stat$maxCooks), cooks_quantile_cutoff)
stat_sig <-
  na.omit(res_stat[res_stat$padj < padj_threshold & res_stat$maxCooks < max_cooks,])
}

#All comparisons

```



```
write.table(res_stat, file="DESeqRes_OrgsRemMet_Func.txt", quote = F, row.names = F, sep="\t")

#Significant taxa in table
if (nrow(stat_sig) > 0) {
kable(stat_sig, row.names = F)
write.table(stat_sig, file="DESeqRes_SigOrgsRemMet_Func.txt", quote = F, row.names = F, sep="\t")
} else {
  print("No significant taxa were found.")
}
print("Significant Wald")
```

[1] "Significant Wald"

```
kable(stat_sig)
```

|     | baseMean    | log2FoldChange | lfcSE    | stat     | pvalue   | padj     | gene                                                                 | g1   | g2      | compare         |
|-----|-------------|----------------|----------|----------|----------|----------|----------------------------------------------------------------------|------|---------|-----------------|
| 895 | 218.41483   | 0.165381       | 0.729447 | 0.35370  | 0.000354 | 0.006945 | Sphingolipid biosynthesis - lacto and neolacto series [PATH:ko00601] | LADA | T1D     | LADA vs T1D     |
| 552 | 995.37261   | 0.849568       | 0.486783 | 1.79957  | 0.000140 | 0.016287 | Geraniol degradation [PATH:ko00281]                                  | LADA | Control | LADA vs Control |
| 512 | 726.81271   | 0.883919       | 0.500306 | 1.76553  | 0.000160 | 0.016287 | Alpha-Linolenic acid metabolism [PATH:ko00592]                       | LADA | Control | LADA vs Control |
| 571 | 498.14931   | 0.950677       | 0.578853 | 1.69890  | 0.000750 | 0.033309 | Toluene degradation [PATH:ko00642]                                   | LADA | Control | LADA vs Control |
| 466 | 20233.1183  | -0.151666      | 0.495256 | -3.26544 | 0.001090 | 0.033309 | Glucosinolate biosynthesis [PATH:ko00966]                            | LADA | Control | LADA vs Control |
| 459 | 214043.7487 | -0.146278      | 0.465922 | -3.18517 | 0.001440 | 0.033309 | Valine, leucine and isoleucine biosynthesis [PATH:ko00290]           | LADA | Control | LADA vs Control |
| 579 | 404909.1603 | -0.146997      | 0.465615 | -3.16750 | 0.001530 | 0.033309 | Oxocarboxylic acid metabolism                                        | LADA | Control | LADA vs Control |
| 472 | 28826.6477  | -0.156071      | 0.493017 | -3.15891 | 0.001580 | 0.033309 | Phenazine biosynthesis [PATH:ko00405]                                | LADA | Control | LADA vs Control |
| 515 | 217.39271   | 0.621145       | 0.513913 | 1.17545  | 0.001600 | 0.033309 | Other lipid metabolism [PATH:ko00565]                                | LADA | Control | LADA vs Control |

|     | baseMean     | log2FoldChange | negLog10Pvalue | stat     | pvalue    | padj      | gene                                                                     | g1    | g2      | compare               |
|-----|--------------|----------------|----------------|----------|-----------|-----------|--------------------------------------------------------------------------|-------|---------|-----------------------|
| 536 | 224290.1230  | - 0.1456522    | - 0.0016305    | 3.150396 | 0.0016305 | 0.0333309 | Thiamine metabolism<br>[PATH:ko00730]                                    | LADAC | Control | LADA<br>vs<br>Control |
| 456 | 333727.4578  | - 0.1468106    | - 0.0018900    | 3.106737 | 0.0018900 | 0.0333309 | Phenylalanine, tyrosine and<br>tryptophan biosynthesis<br>[PATH:ko00400] | LADAC | Control | LADA<br>vs<br>Control |
| 532 | 247957.9855  | - 0.1437419    | - 0.0020387    | 3.084531 | 0.0020387 | 0.0333309 | Pantothenate and CoA<br>biosynthesis [PATH:ko00770]                      | LADAC | Control | LADA<br>vs<br>Control |
| 580 | 1815934.8143 | - 0.1451658    | - 0.0020393    | 3.084445 | 0.0020393 | 0.0333309 | Biosynthesis of amino acids                                              | LADAC | Control | LADA<br>vs<br>Control |
| 480 | 126907.2600  | - 0.1488881    | - 0.0023301    | 3.043801 | 0.0023301 | 0.0346055 | 5-Branched dibasic acid<br>metabolism [PATH:ko00660]                     | LADAC | Control | LADA<br>vs<br>Control |
| 497 | 157444.2964  | - 0.1587955    | - 0.0026102    | 3.009563 | 0.0026102 | 0.0346055 | Photosynthesis [PATH:ko00195]                                            | LADAC | Control | LADA<br>vs<br>Control |
| 449 | 233417.0192  | - 0.1463935    | - 0.0030970    | 2.957939 | 0.0030970 | 0.0346055 | Arginine biosynthesis<br>[PATH:ko00220]                                  | LADAC | Control | LADA<br>vs<br>Control |
| 518 | 145328.6061  | - 0.1558211    | - 0.0034801    | 2.921000 | 0.0034801 | 0.0346055 | Glycerolipid metabolism<br>[PATH:ko00561]                                | LADAC | Control | LADA<br>vs<br>Control |
| 488 | 325138.2598  | - 0.1483497    | - 0.0036100    | 2.910059 | 0.0036100 | 0.0346055 | Pentose phosphate pathway<br>[PATH:ko00030]                              | LADAC | Control | LADA<br>vs<br>Control |
| 442 | 1242724.7973 | - 0.1483038    | - 0.0036967    | 2.903027 | 0.0036967 | 0.0346055 | Aminoacyl-tRNA biosynthesis<br>[PATH:ko00970]                            | LADAC | Control | LADA<br>vs<br>Control |
| 453 | 252348.0759  | - 0.1466721    | - 0.0037600    | 2.897489 | 0.0037600 | 0.0346055 | Lysine biosynthesis<br>[PATH:ko00300]                                    | LADAC | Control | LADA<br>vs<br>Control |
| 581 | 2443269.7600 | - 0.1447959    | - 0.0042901    | 2.855779 | 0.0042901 | 0.0346055 | Biosynthesis of antibiotics                                              | LADAC | Control | LADA<br>vs<br>Control |
| 475 | 139233.4459  | - 0.1566944    | - 0.0043605    | 2.850322 | 0.0043605 | 0.0346055 | Streptomycin biosynthesis<br>[PATH:ko00521]                              | LADAC | Control | LADA<br>vs<br>Control |

|     | baseMean     | log2FoldChange | negLog10Padj | stat    | pvalue                                                           | padj        | gene        | g1          | g2            | compare |
|-----|--------------|----------------|--------------|---------|------------------------------------------------------------------|-------------|-------------|-------------|---------------|---------|
| 558 | 181462.8427  | - 0.1453436    | - 0.0045004  | 4034605 | Terpenoid backbone biosynthesis<br>[PATH:ko00900]                | LADAControl | LADAControl | LADAControl | vs<br>Control |         |
| 439 | 146391.9670  | - 0.1530901    | - 0.0047400  | 4034605 | Nucleotide excision repair<br>[PATH:ko03420]                     | LADAControl | LADAControl | LADAControl | vs<br>Control |         |
| 546 | 141097.1809  | - 0.1443530    | - 0.0047900  | 4034605 | Fluorocompound metabolism<br>[PATH:ko00450]                      | LADAControl | LADAControl | LADAControl | vs<br>Control |         |
| 492 | 221545.5958  | - 0.1505185    | - 0.0048108  | 4034605 | Carbon fixation in<br>photosynthetic organisms<br>[PATH:ko00710] | LADAControl | LADAControl | LADAControl | vs<br>Control |         |
| 450 | 402736.7400  | - 0.1433237    | - 0.0049104  | 4034605 | Cysteine and methionine<br>metabolism [PATH:ko00270]             | LADAControl | LADAControl | LADAControl | vs<br>Control |         |
| 464 | 31621.9628   | - 0.1553161    | - 0.0051308  | 4034605 | Carbapenem biosynthesis<br>[PATH:ko00332]                        | LADAControl | LADAControl | LADAControl | vs<br>Control |         |
| 582 | 3152810.7079 | - 0.1436862    | - 0.0052285  | 4034605 | Biosynthesis of secondary<br>metabolites                         | LADAControl | LADAControl | LADAControl | vs<br>Control |         |
| 434 | 248750.5462  | - 0.1506456    | - 0.0053907  | 4034605 | DNA replication [PATH:ko03030]                                   | LADAControl | LADAControl | LADAControl | vs<br>Control |         |
| 437 | 295711.6414  | - 0.1460507    | - 0.0054600  | 4034605 | Mismatch repair [PATH:ko03430]                                   | LADAControl | LADAControl | LADAControl | vs<br>Control |         |
| 556 | 80950.4860   | - 0.1655288    | - 0.0057700  | 4034605 | Polyketide sugar unit<br>biosynthesis [PATH:ko00523]             | LADAControl | LADAControl | LADAControl | vs<br>Control |         |
| 588 | 1850407.2352 | - 0.1485772    | - 0.0058607  | 4034605 | Microbial metabolism in diverse<br>environments                  | LADAControl | LADAControl | LADAControl | vs<br>Control |         |
| 399 | 75913.7098   | - 0.1522231    | - 0.0059800  | 4034605 | Apoptosis [PATH:ko04217]                                         | LADAControl | LADAControl | LADAControl | vs<br>Control |         |
| 468 | 106341.5172  | - 0.1483929    | - 0.0063100  | 4034605 | Monobactam biosynthesis<br>[PATH:ko00261]                        | LADAControl | LADAControl | LADAControl | vs<br>Control |         |

|     | baseMean          | log2FoldChange | negLog10Padj | stat      | pvalue    | padj                                                                            | gene                                                          | g1      | g2                    | compare               |
|-----|-------------------|----------------|--------------|-----------|-----------|---------------------------------------------------------------------------------|---------------------------------------------------------------|---------|-----------------------|-----------------------|
| 510 | 292604.4221       | -              | 0.1460985    | -         | 0.0067108 | 0.0346055                                                                       | Peptidoglycan biosynthesis<br>[PATH:ko00550]                  | LADA    | Control               | LADA<br>vs<br>Control |
| 452 | 176722.9416       | -              | 0.1486319    | -         | 0.0067409 | 0.0346055                                                                       | Histidine metabolism<br>[PATH:ko00340]                        | LADA    | Control               | LADA<br>vs<br>Control |
| 560 | 809598.0466       | -              | 0.1460364    | -         | 0.0071465 | 0.0346055                                                                       | Urine metabolism<br>[PATH:ko00230]                            | LADA    | Control               | LADA<br>vs<br>Control |
| 451 | 329925.6733       | -              | 0.1471814    | -         | 0.0072300 | 0.0346055                                                                       | Glycine, serine and threonine<br>metabolism [PATH:ko00260]    | LADA    | Control               | LADA<br>vs<br>Control |
| 429 | 219109.5944       | -              | 0.1449681    | -         | 0.0073488 | 0.0346055                                                                       | Protein export [PATH:ko03060]                                 | LADA    | Control               | LADA<br>vs<br>Control |
| 447 | 372509.6882       | -              | 0.1477005    | -         | 0.0074107 | 0.0346055                                                                       | Alanine, aspartate and glutamate<br>metabolism [PATH:ko00250] | LADA    | Control               | LADA<br>vs<br>Control |
| 587 | 6821207.1504      | -              | 0.1444684    | -         | 0.0078900 | 0.0346055                                                                       | Metabolic pathways                                            | LADA    | Control               | LADA<br>vs<br>Control |
| 561 | 644062.4895       | -              | 0.1469399    | -         | 0.0081670 | 0.0346055                                                                       | Pyrimidine metabolism<br>[PATH:ko00240]                       | LADA    | Control               | LADA<br>vs<br>Control |
| 503 | 218.41481.7624287 | 0.6668238      | 0.43010      | 0.0082102 | 0.0346055 | Glycosphingolipid biosynthesis -<br>lacto and neolacto series<br>[PATH:ko00601] | LADA                                                          | Control | LADA<br>vs<br>Control |                       |
| 470 | 51850.3070        | -              | 0.1483092    | -         | 0.0084008 | 0.0346055                                                                       | Novobiocin biosynthesis<br>[PATH:ko00401]                     | LADA    | Control               | LADA<br>vs<br>Control |
| 444 | 964710.8102       | -              | 0.1519152    | -         | 0.0084402 | 0.0346055                                                                       | Ribosome [PATH:ko03010]                                       | LADA    | Control               | LADA<br>vs<br>Control |
| 543 | 53072.2312        | -              | 0.1495685    | -         | 0.0085705 | 0.0346055                                                                       | Glutamine and D-glutamate<br>metabolism [PATH:ko00471]        | LADA    | Control               | LADA<br>vs<br>Control |
| 484 | 470076.0858       | -              | 0.1471068    | -         | 0.0085908 | 0.0346055                                                                       | Glycolysis / Gluconeogenesis<br>[PATH:ko00010]                | LADA    | Control               | LADA<br>vs<br>Control |

|     | baseMean     | log2FoldChange | lfcSE     | stat     | pvalue    | padj      | gene                                                  | g1   | g2      | compare         |
|-----|--------------|----------------|-----------|----------|-----------|-----------|-------------------------------------------------------|------|---------|-----------------|
| 406 | 609155.5539  | -              | 0.1582191 | -        | 0.0086908 | 0.0346055 | Quorum sensing [PATH:ko02024]                         | LADA | Control | LADA vs Control |
|     | 0.4151082    |                |           |          | 2.623630  |           |                                                       |      |         |                 |
| 548 | 39830.4805   | -              | 0.1800728 | -        | 0.0092703 | 0.0346055 | Biosynthesis of ansamycins [PATH:ko01051]             | LADA | Control | LADA vs Control |
|     | 0.4685157    |                |           |          | 2.601813  |           |                                                       |      |         |                 |
| 584 | 1023857.9733 | -              | 0.1510695 | -        | 0.0093008 | 0.0346055 | Carbon metabolism                                     | LADA | Control | LADA vs Control |
|     | 0.3928505    |                |           |          | 2.600463  |           |                                                       |      |         |                 |
| 538 | 77161.2179   | -              | 0.1496063 | -        | 0.0093207 | 0.0346055 | Vitamin B6 metabolism [PATH:ko00750]                  | LADA | Control | LADA vs Control |
|     | 0.3889528    |                |           |          | 2.599843  |           |                                                       |      |         |                 |
| 395 | 156155.0223  | -              | 0.1470148 | -        | 0.0093601 | 0.0346055 | Cell cycle - Caulobacter [PATH:ko04112]               | LADA | Control | LADA vs Control |
|     | 0.3820294    |                |           |          | 2.598577  |           |                                                       |      |         |                 |
| 441 | 69732.4972   | -              | 0.1871100 | -        | 0.0094888 | 0.0346055 | RNA polymerase [PATH:ko03020]                         | LADA | Control | LADA vs Control |
|     | 0.4853486    |                |           |          | 2.593922  |           |                                                       |      |         |                 |
| 431 | 192358.4294  | -              | 0.1489797 | -        | 0.0095908 | 0.0346055 | RNA degradation [PATH:ko03018]                        | LADA | Control | LADA vs Control |
|     | 0.3858619    |                |           |          | 2.590029  |           |                                                       |      |         |                 |
| 530 | 170759.3562  | -              | 0.1497340 | -        | 0.0098505 | 0.0346055 | Nicotinate and nicotinamide metabolism [PATH:ko00760] | LADA | Control | LADA vs Control |
|     | 0.3864684    |                |           |          | 2.581032  |           |                                                       |      |         |                 |
| 436 | 326813.5597  | -              | 0.1509256 | -        | 0.0098803 | 0.0346055 | Homologous recombination [PATH:ko03440]               | LADA | Control | LADA vs Control |
|     | 0.3893499    |                |           |          | 2.579746  |           |                                                       |      |         |                 |
| 854 | 234.07522    | 2.4289120      | 0.6950592 | 2.494540 | 0.0004709 | 0.0358391 | Betalain biosynthesis [PATH:ko00965]                  | LADA | T1D     | LADA vs T1D     |
| 837 | 34492.8040   | -              | 0.3264315 | -        | 0.0005400 | 0.0358391 | Ribosome biogenesis in eukaryotes [PATH:ko03008]      | LADA | T1D     | LADA vs T1D     |
|     | 1.1280988    |                |           |          | 3.455852  |           |                                                       |      |         |                 |
| 432 | 102284.1173  | -              | 0.1572148 | -        | 0.0107400 | 0.0369488 | Sulfur relay system [PATH:ko04122]                    | LADA | Control | LADA vs Control |
|     | 0.4010417    |                |           |          | 2.550916  |           |                                                       |      |         |                 |
| 486 | 52178.4796   | -              | 0.1839627 | -        | 0.0109507 | 0.0369488 | Inositol phosphate metabolism [PATH:ko00562]          | LADA | Control | LADA vs Control |
|     | 0.4679973    |                |           |          | 2.543980  |           |                                                       |      |         |                 |

|     | baseMean    | log2FoldChange | negLog10Padj | stat   | pvalue    | padj       | gene                                                 | g1      | g2      | compare         |
|-----|-------------|----------------|--------------|--------|-----------|------------|------------------------------------------------------|---------|---------|-----------------|
| 483 | 375800.7897 | - 0.1558915    | - 0.0111203  | 369488 | 0.0111203 | 0.3957822  | 2.538832                                             | LADAC   | Control | LADA vs Control |
|     |             |                |              |        |           |            | [PATH:ko00052]                                       |         |         |                 |
| 489 | 229437.8083 | - 0.1484285    | - 0.0116283  | 379856 | 0.0116283 | 0.3745192  | 2.523229                                             | LADAC   | Control | LADA vs Control |
|     |             |                |              |        |           |            | [PATH:ko00640]                                       |         |         |                 |
| 478 | 54800.4783  | - 0.2089664    | - 0.0121662  | 386415 | 0.0121662 | 0.5239446  | 2.507315                                             | LADAC   | Control | LADA vs Control |
|     |             |                |              |        |           |            | ascorbate and aldarate metabolism [PATH:ko00053]     |         |         |                 |
| 531 | 188159.1347 | - 0.1516718    | - 0.0122202  | 386401 | 0.0122202 | 0.3800339  | 2.505634                                             | LADAC   | Control | LADA vs Control |
|     |             |                |              |        |           |            | one carbon pool by folate [PATH:ko00670]             |         |         |                 |
| 519 | 226187.9392 | - 0.1493114    | - 0.0125377  | 390061 | 0.0125377 | 0.3727765  | 2.496638                                             | LADAC   | Control | LADA vs Control |
|     |             |                |              |        |           |            | glycerophospholipid metabolism [PATH:ko00564]        |         |         |                 |
| 8   | 157791.6919 | 0.1905708      | 0.1888736    | 56309  | 0.0002569 | 0.15905708 | 3.056309                                             | Control | T1D     | Control vs T1D  |
|     |             |                |              |        |           |            | [PATH:ko02030]                                       |         |         |                 |
| 9   | 188508.8974 | 0.082239       | 0.1999969    | 541176 | 0.0003983 | 0.07482239 | 3.411176                                             | Control | T1D     | Control vs T1D  |
|     |             |                |              |        |           |            | [PATH:ko02040]                                       |         |         |                 |
| 461 | 39632.6542  | - 0.1647847    | - 0.0127769  | 391200 | 0.0127769 | 0.4103159  | 2.490012                                             | LADAC   | Control | LADA vs Control |
|     |             |                |              |        |           |            | arabose and validamycin biosynthesis [PATH:ko00525]  |         |         |                 |
| 495 | 133882.2838 | - 0.1447994    | - 0.0136800  | 408927 | 0.0136800 | 0.3570076  | 2.465532                                             | LADAC   | Control | LADA vs Control |
|     |             |                |              |        |           |            | nitrogen metabolism [PATH:ko00910]                   |         |         |                 |
| 482 | 372388.2684 | - 0.1745675    | - 0.0137700  | 408927 | 0.0137700 | 0.4299961  | 2.463208                                             | LADAC   | Control | LADA vs Control |
|     |             |                |              |        |           |            | fructose and mannose metabolism [PATH:ko00051]       |         |         |                 |
| 418 | 40343.0949  | - 0.1539671    | - 0.0147603  | 431821 | 0.0147603 | 0.3753999  | 2.438183                                             | LADAC   | Control | LADA vs Control |
|     |             |                |              |        |           |            | PI3K-AKT signaling pathway [PATH:ko04066]            |         |         |                 |
| 462 | 234.0752    | 1.5430200      | 0.6355087    | 428008 | 0.0151800 | 0.2340752  | 3.428008                                             | LADAC   | Control | LADA vs Control |
|     |             |                |              |        |           |            | betalain biosynthesis [PATH:ko00965]                 |         |         |                 |
| 423 | 33035.9265  | - 0.1581888    | - 0.0157004  | 442859 | 0.0157004 | 0.3821498  | 2.415784                                             | LADAC   | Control | LADA vs Control |
|     |             |                |              |        |           |            | phosphatidylinositol signaling system [PATH:ko04070] |         |         |                 |

|     | baseMean     | log2FoldChange | negLog10Padj | stat    | pvalue    | padj      | gene                                                                        | g1    | g2      | compare               |
|-----|--------------|----------------|--------------|---------|-----------|-----------|-----------------------------------------------------------------------------|-------|---------|-----------------------|
| 412 | 1042044.9923 | -0.1527751     | 0.0158164    | 44285   | 0.0158164 | 0.0158164 | ABC transporters<br>[PATH:ko02010]                                          | LADAC | Control | LADA<br>vs<br>Control |
| 433 | 143343.1025  | -0.1480025     | 0.0161800    | 44675   | 0.0161800 | 0.0161800 | Base excision repair<br>[PATH:ko03410]                                      | LADAC | Control | LADA<br>vs<br>Control |
| 573 | 3114.1040    | 0.9598400      | 0.0128043    | 4391948 | 0.0167504 | 0.0167504 | Metabolism of xenobiotics by<br>cytochrome P450<br>[PATH:ko00980]           | LADAC | Control | LADA<br>vs<br>Control |
| 569 | 3116.3570    | 0.9594570      | 0.0128043    | 4391896 | 0.0167600 | 0.0167600 | Drug metabolism - cytochrome<br>P450 [PATH:ko00982]                         | LADAC | Control | LADA<br>vs<br>Control |
| 491 | 536904.8335  | -0.1542304     | 0.0188308    | 493965  | 0.0188308 | 0.0188308 | Glycarch and sucrose metabolism<br>[PATH:ko00500]                           | LADAC | Control | LADA<br>vs<br>Control |
| 408 | 8775.0280    | -0.2900864     | 0.0188904    | 493905  | 0.0188904 | 0.0188904 | Autophagy - yeast<br>[PATH:ko04138]                                         | LADAC | Control | LADA<br>vs<br>Control |
| 477 | 543686.3387  | -0.1480588     | 0.0191605    | 494243  | 0.0191605 | 0.0191605 | Amino sugar and nucleotide<br>sugar metabolism<br>[PATH:ko00520]            | LADAC | Control | LADA<br>vs<br>Control |
| 490 | 379607.9172  | -0.1481374     | 0.0204501    | 5105178 | 0.0204501 | 0.0204501 | Pyruvate metabolism<br>[PATH:ko00620]                                       | LADAC | Control | LADA<br>vs<br>Control |
| 476 | 35023.1733   | -0.1490192     | 0.0206065    | 5105178 | 0.0206065 | 0.0206065 | Tropane, piperidine and pyridine<br>alkaloid biosynthesis<br>[PATH:ko00960] | LADAC | Control | LADA<br>vs<br>Control |
| 550 | 21941.8889   | -0.1738548     | 0.0213702    | 530248  | 0.0213702 | 0.0213702 | Biosynthesis of vancomycin group<br>antibiotics [PATH:ko01055]              | LADAC | Control | LADA<br>vs<br>Control |
| 533 | 223648.1833  | -0.1792528     | 0.0226202    | 549700  | 0.0226202 | 0.0226202 | Porphyrin and chlorophyll<br>metabolism [PATH:ko00860]                      | LADAC | Control | LADA<br>vs<br>Control |
| 516 | 177269.3156  | -0.1535873     | 0.0227102    | 549700  | 0.0227102 | 0.0227102 | Fatty acid biosynthesis<br>[PATH:ko00061]                                   | LADAC | Control | LADA<br>vs<br>Control |
| 446 | 40338.5823   | -0.2443756     | 0.0230264    | 5550363 | 0.0230264 | 0.0230264 | tRNA transport [PATH:ko03013]                                               | LADAC | Control | LADA<br>vs<br>Control |

|     | baseMean    | log2FoldChange | negLog10Pvalue | stat      | pvalue    | padj      | gene                                                   | g1      | g2      | compare         |
|-----|-------------|----------------|----------------|-----------|-----------|-----------|--------------------------------------------------------|---------|---------|-----------------|
| 586 | 192044.3923 | - 0.1520407    | - 0.0240073    | 0.0240073 | 0.0240073 | 0.0356691 | Fatty acid metabolism                                  | LADAC   | Control | LADA vs Control |
|     | 0.3431576   |                |                | 2.257013  |           |           |                                                        |         |         |                 |
| 521 | 17743.1539  | - 0.1825900    | - 0.0245565    | 0.0245565 | 0.0245565 | 0.0556915 | Primary bile acid biosynthesis [PATH:ko00120]          | LADAC   | Control | LADA vs Control |
|     | 0.4105272   |                |                | 2.248355  |           |           |                                                        |         |         |                 |
| 414 | 351515.7936 | - 0.2015615    | - 0.0246809    | 0.0246809 | 0.0246809 | 0.0569158 | Phosphotransferase system (PTS) [PATH:ko02060]         | LADAC   | Control | LADA vs Control |
|     | 0.4527736   |                |                | 2.246330  |           |           |                                                        |         |         |                 |
| 445 | 34492.8040  | - 0.2985989    | - 0.0252405    | 0.0252405 | 0.0252405 | 0.0574628 | Ribosome biogenesis in eukaryotes [PATH:ko03008]       | LADAC   | Control | LADA vs Control |
|     | 0.6681708   |                |                | 2.237686  |           |           |                                                        |         |         |                 |
| 539 | 51220.4380  | - 0.1588104    | - 0.0259707    | 0.0259707 | 0.0259707 | 0.0574628 | Beta-Alanine metabolism [PATH:ko00410]                 | LADAC   | Control | LADA vs Control |
|     | 0.3536103   |                |                | 2.226619  |           |           |                                                        |         |         |                 |
| 479 | 201350.0983 | - 0.1489087    | - 0.0262367    | 0.0262367 | 0.0262367 | 0.0574628 | Butanoate metabolism [PATH:ko00650]                    | LADAC   | Control | LADA vs Control |
|     | 0.3309800   |                |                | 2.222705  |           |           |                                                        |         |         |                 |
| 485 | 251341.3035 | - 0.1494912    | - 0.0263103    | 0.0263103 | 0.0263103 | 0.0574628 | Oxalate and dicarboxylate metabolism [PATH:ko00630]    | LADAC   | Control | LADA vs Control |
|     | 0.3321076   |                |                | 2.221587  |           |           |                                                        |         |         |                 |
| 522 | 17771.8975  | - 0.1823325    | - 0.0266088    | 0.0266088 | 0.0266088 | 0.0574628 | Secondary bile acid biosynthesis [PATH:ko00121]        | LADAC   | Control | LADA vs Control |
|     | 0.4042692   |                |                | 2.217209  |           |           |                                                        |         |         |                 |
| 528 | 169835.3685 | - 0.1587020    | - 0.0269802    | 0.0269802 | 0.0269802 | 0.0574628 | Starch biosynthesis [PATH:ko00790]                     | LADAC   | Control | LADA vs Control |
|     | 0.3510131   |                |                | 2.211776  |           |           |                                                        |         |         |                 |
| 559 | 17603.1775  | - 0.1608332    | - 0.0272008    | 0.0272008 | 0.0272008 | 0.0574628 | Seratin biosynthesis [PATH:ko00908]                    | LADAC   | Control | LADA vs Control |
|     | 0.3552200   |                |                | 2.208623  |           |           |                                                        |         |         |                 |
| 493 | 306154.1550 | - 0.1542894    | - 0.0275005    | 0.0275005 | 0.0275005 | 0.0574628 | Carbon fixation pathways in prokaryotes [PATH:ko00720] | LADAC   | Control | LADA vs Control |
|     | 0.3401062   |                |                | 2.204340  |           |           |                                                        |         |         |                 |
| 496 | 328532.7684 | - 0.1512218    | - 0.0275587    | 0.0275587 | 0.0275587 | 0.0574628 | Oxidative phosphorylation [PATH:ko00190]               | LADAC   | Control | LADA vs Control |
|     | 0.3332191   |                |                | 2.203512  |           |           |                                                        |         |         |                 |
| 236 | 102284.1073 | - 0.1485672    | - 0.1209329    | 0.0039485 | 0.0039485 | 0.0629453 | Sulfur relay system [PATH:ko04122]                     | Control | T2D     | Control vs T2D  |



|     | baseMean      | log2FoldChange | negLog10Pvalue  | stat     | pvalue                                                        | padj  | gene | g1                   | g2 | compare |
|-----|---------------|----------------|-----------------|----------|---------------------------------------------------------------|-------|------|----------------------|----|---------|
| 322 | 145328.606314 | 449810.119863  | 3774080.004050  | 00629443 | Glycerolipid metabolism<br>[PATH:ko00561]                     | Contr | T2D  | Control<br>vs<br>T2D |    |         |
| 366 | 19177.75851   | 2204520.147242 | 5866328.004150  | 00629443 | Aminobenzoate degradation<br>[PATH:ko00627]                   | Contr | T2D  | Control<br>vs<br>T2D |    |         |
| 230 | 565135.90036  | 233130.127623  | 839010.004525   | 00629443 | Two-component system<br>[PATH:ko02020]                        | Contr | T2D  | Control<br>vs<br>T2D |    |         |
| 207 | 139018.70377  | 674230.132998  | 232680.004610   | 00629443 | Biofilm formation - Escherichia coli<br>[PATH:ko02026]        | Contr | T2D  | Control<br>vs<br>T2D |    |         |
| 314 | 292604.40231  | 1582400.112382 | 7810210.004950  | 00629443 | Peptidoglycan biosynthesis<br>[PATH:ko00550]                  | Contr | T2D  | Control<br>vs<br>T2D |    |         |
| 323 | 226187.90322  | 2079730.114850 | 2793030.005220  | 00629443 | Glycerophospholipid metabolism<br>[PATH:ko00564]              | Contr | T2D  | Control<br>vs<br>T2D |    |         |
| 301 | 157444.20633  | 3808700.122151 | 2767760.005640  | 00629443 | Photosynthesis [PATH:ko00195]                                 | Contr | T2D  | Control<br>vs<br>T2D |    |         |
| 218 | 351515.70302  | 2903630.155049 | 20767100.005650 | 00629443 | Phosphotransferase system (PTS)<br>[PATH:ko02060]             | Contr | T2D  | Control<br>vs<br>T2D |    |         |
| 352 | 39830.48053   | 145120.138519  | 2753770.005890  | 01062944 | Biosynthesis of ansamycins<br>[PATH:ko01051]                  | Contr | T2D  | Control<br>vs<br>T2D |    |         |
| 302 | 165767.90032  | 2931620.126231 | 29688030.007180 | 00629443 | Sulfur metabolism<br>[PATH:ko00920]                           | Contr | T2D  | Control<br>vs<br>T2D |    |         |
| 370 | 23793.30013   | 3205180.125491 | 27645940.008140 | 00629443 | Chloroalkane and chloroalkene degradation<br>[PATH:ko00625]   | Contr | T2D  | Control<br>vs<br>T2D |    |         |
| 336 | 247957.90529  | 2015920.110571 | 2824170.008680  | 00629443 | Pantothenate and CoA biosynthesis<br>[PATH:ko00770]           | Contr | T2D  | Control<br>vs<br>T2D |    |         |
| 288 | 470076.00528  | 2393710.113160 | 2597520.009380  | 00629443 | Glycolysis / Gluconeogenesis<br>[PATH:ko00010]                | Contr | T2D  | Control<br>vs<br>T2D |    |         |
| 345 | 36295.18035   | 3008850.116178 | 1589860.009600  | 00629443 | D-Alanine metabolism<br>[PATH:ko00473]                        | Contr | T2D  | Control<br>vs<br>T2D |    |         |
| 340 | 224290.10238  | 2990240.112041 | 2587460.009660  | 00629443 | Thiamine metabolism<br>[PATH:ko00730]                         | Contr | T2D  | Control<br>vs<br>T2D |    |         |
| 203 | 75913.70080   | 218600.117092  | 29580670.009860 | 00629443 | Necroptosis [PATH:ko04217]                                    | Contr | T2D  | Control<br>vs<br>T2D |    |         |
| 296 | 221545.50528  | 2738140.115782 | 27568400.010210 | 00629443 | Carbon fixation in photosynthetic organisms<br>[PATH:ko00710] | Contr | T2D  | Control<br>vs<br>T2D |    |         |

|     | baseMean   | log2FoldChange | negLog10Pvalue | stat   | pvalue    | padj      | gene                                                                     | g1      | g2  | compare              |
|-----|------------|----------------|----------------|--------|-----------|-----------|--------------------------------------------------------------------------|---------|-----|----------------------|
| 276 | 28826.64   | 7.3072689      | 12005375       | 59387  | 0.0104867 | 0.0629443 | Phenazine biosynthesis<br>[PATH:ko00405]                                 | Control | T2D | Control<br>vs<br>T2D |
| 241 | 295711.61  | 2861342        | 1123428        | 546859 | 0.0108697 | 0.0629443 | Mismatch repair [PATH:ko03430]                                           | Control | T2D | Control<br>vs<br>T2D |
| 216 | 1042044.09 | 236446         | 1175206        | 541210 | 0.0110469 | 0.0629443 | ABC transporters<br>[PATH:ko02010]                                       | Control | T2D | Control<br>vs<br>T2D |
| 263 | 214043.74  | 2840372        | 1125230        | 524259 | 0.0115903 | 0.0629443 | Valine, leucine and isoleucine<br>biosynthesis [PATH:ko00290]            | Control | T2D | Control<br>vs<br>T2D |
| 286 | 372388.26  | 3377455        | 1342821        | 515156 | 0.0118980 | 0.0629443 | Fuctose and mannose<br>metabolism [PATH:ko00051]                         | Control | T2D | Control<br>vs<br>T2D |
| 295 | 536904.83  | 2978420        | 1186401        | 510467 | 0.0120571 | 0.0629443 | Starch and sucrose metabolism<br>[PATH:ko00500]                          | Control | T2D | Control<br>vs<br>T2D |
| 343 | 51220.43   | 30055463       | 1221636        | 501120 | 0.0123800 | 0.0629443 | Beta-Alanine metabolism<br>[PATH:ko00410]                                | Control | T2D | Control<br>vs<br>T2D |
| 272 | 106341.50  | 2853569        | 1141496        | 499850 | 0.0124200 | 0.0629443 | Bonobactam biosynthesis<br>[PATH:ko00261]                                | Control | T2D | Control<br>vs<br>T2D |
| 233 | 219109.59  | 2784597        | 1115131        | 497058 | 0.0125209 | 0.0629443 | Protein export [PATH:ko03060]                                            | Control | T2D | Control<br>vs<br>T2D |
| 260 | 333727.45  | 2816193        | 1129323        | 493700 | 0.0126409 | 0.0629443 | Phenylalanine, tyrosine and<br>tryptophan biosynthesis<br>[PATH:ko00400] | Control | T2D | Control<br>vs<br>T2D |
| 384 | 1815934.81 | 232626         | 1116671        | 491898 | 0.0127064 | 0.0629443 | Biosynthesis of amino acids                                              | Control | T2D | Control<br>vs<br>T2D |
| 208 | 75850.00   | 3276914        | 1318327        | 485660 | 0.0129301 | 0.0629443 | Biofilm formation - Pseudomonas<br>aeruginosa [PATH:ko02025]             | Control | T2D | Control<br>vs<br>T2D |
| 350 | 141097.16  | 2749259        | 1110419        | 475876 | 0.0132900 | 0.0629443 | Glucanopolysaccharide metabolism<br>[PATH:ko00450]                       | Control | T2D | Control<br>vs<br>T2D |
| 237 | 143343.10  | 2779836        | 1138494        | 441678 | 0.0146192 | 0.0629443 | Base excision repair<br>[PATH:ko03410]                                   | Control | T2D | Control<br>vs<br>T2D |
| 383 | 404909.16  | 2755057        | 1130702        | 436460 | 0.0148308 | 0.0629443 | Oxocarboxylic acid metabolism                                            | Control | T2D | Control<br>vs<br>T2D |
| 217 | 190235.97  | 2734360        | 1122530        | 435890 | 0.0148562 | 0.0629443 | Bacterial secretion system<br>[PATH:ko03070]                             | Control | T2D | Control<br>vs<br>T2D |
| 362 | 181462.84  | 2717666        | 1118039        | 430748 | 0.0150679 | 0.0629443 | Terpenoid backbone biosynthesis<br>[PATH:ko00900]                        | Control | T2D | Control<br>vs<br>T2D |

|     | baseMean     | log2FoldChange | lfcSE     | negLog10Pvalue | padj      | gene                                              | g1      | g2      | compare         |
|-----|--------------|----------------|-----------|----------------|-----------|---------------------------------------------------|---------|---------|-----------------|
| 378 | 14742.1787   | 4.79546        | 0.14344   | 26425759       | 0.0152764 | 062944                                            | Control | T2D     | Control vs T2D  |
|     |              |                |           |                |           | Naphthalene degradation [PATH:ko00626]            |         |         |                 |
| 386 | 3152810.7277 | 5682           | 0.110529  | 10420796       | 0.0154866 | 062944                                            | Control | T2D     | Control vs T2D  |
|     |              |                |           |                |           | Biosynthesis of secondary metabolites             |         |         |                 |
| 292 | 325138.2527  | 59617          | 0.114116  | 318249         | 0.0155964 | 062944                                            | Control | T2D     | Control vs T2D  |
|     |              |                |           |                |           | Pentose phosphate pathway [PATH:ko00030]          |         |         |                 |
| 268 | 31621.9628   | 2877683        | 0.119472  | 4808610        | 0.0160164 | 062944                                            | Control | T2D     | Control vs T2D  |
|     |              |                |           |                |           | Carbapenem biosynthesis [PATH:ko00332]            |         |         |                 |
| 270 | 20233.1163   | 2801932        | 0.116663  | 6401678        | 0.0163201 | 062944                                            | Control | T2D     | Control vs T2D  |
|     |              |                |           |                |           | Glucosinolate biosynthesis [PATH:ko00966]         |         |         |                 |
| 335 | 188159.1647  | 2800632        | 0.116672  | 9400436        | 0.0163766 | 062944                                            | Control | T2D     | Control vs T2D  |
|     |              |                |           |                |           | One carbon pool by folate [PATH:ko00670]          |         |         |                 |
| 253 | 233417.0127  | 700907         | 0.112612  | 5398429        | 0.0164666 | 062944                                            | Control | T2D     | Control vs T2D  |
|     |              |                |           |                |           | Arginine biosynthesis [PATH:ko00220]              |         |         |                 |
| 240 | 326813.5627  | 775516         | 0.116092  | 9390668        | 0.0168177 | 062944                                            | Control | T2D     | Control vs T2D  |
|     |              |                |           |                |           | Homologous recombination [PATH:ko03440]           |         |         |                 |
| 257 | 252348.0726  | 297013         | 0.112823  | 3890429        | 0.0168290 | 062944                                            | Control | T2D     | Control vs T2D  |
|     |              |                |           |                |           | Lysine biosynthesis [PATH:ko00300]                |         |         |                 |
| 204 | 157791.6914  | 44263          | 0.208018  | 8376834        | 0.0174609 | 062944                                            | Control | T2D     | Control vs T2D  |
|     |              |                |           |                |           | Bacterial chemotaxis [PATH:ko02030]               |         |         |                 |
| 254 | 402736.7426  | 17229          | 0.110251  | 373900         | 0.0176003 | 062944                                            | Control | T2D     | Control vs T2D  |
|     |              |                |           |                |           | Cysteine and methionine metabolism [PATH:ko00270] |         |         |                 |
| 385 | 2443269.7603 | 6503           | 0.111382  | 6367069        | 0.0179296 | 062944                                            | Control | T2D     | Control vs T2D  |
|     |              |                |           |                |           | Biosynthesis of antibiotics                       |         |         |                 |
| 205 | 188508.8954  | 196077         | 0.220272  | 7358929        | 0.0183278 | 063007                                            | Control | T2D     | Control vs T2D  |
|     |              |                |           |                |           | Flagellar assembly [PATH:ko02040]                 |         |         |                 |
| 944 | 995.37261    | 6957014        | 0.532183  | 3186310        | 0.0014400 | 063289                                            | LADAT1D | LADA    | LADA vs T1D     |
|     |              |                |           |                |           | Craniol degradation [PATH:ko00281]                |         |         |                 |
| 838 | 40338.5823   | -              | 0.2671543 | -              | 0.0016869 | 063289                                            | LADAT1D | LADA    | LADA vs T1D     |
|     |              | 0.8390318      |           | 3.140627       |           |                                                   |         |         |                 |
| 833 | 69732.4972   | -              | 0.2045511 | -              | 0.0019374 | 063289                                            | LADAT1D | LADA    | LADA vs T1D     |
|     |              | 0.6340390      |           | 3.099661       |           |                                                   |         |         |                 |
|     |              |                |           |                |           | RNA polymerase [PATH:ko03020]                     |         |         |                 |
| 541 | 36295.1835   | -              | 0.1510288 | -              | 0.0311468 | 064251                                            | LADAC   | Control | LADA vs Control |
|     |              | 0.3255017      |           | 2.155230       |           |                                                   |         |         |                 |
|     |              |                |           |                |           | Alanine metabolism [PATH:ko00473]                 |         |         |                 |

|     | baseMean     | log2FoldChange | lfcSE     | negLog10Pvalue | padj      | gene                      | g1      | g2      | compare               |
|-----|--------------|----------------|-----------|----------------|-----------|---------------------------|---------|---------|-----------------------|
| 467 | 17841.4191   | -              | 0.1573568 | -              | 0.0315104 | 0643358<br>[PATH:ko00950] | LADA    | Control | LADA<br>vs<br>Control |
| 267 | 32062.9303   | 3590663        | 0.1539630 | 332130         | 0.0196908 | 0661575<br>[PATH:ko00999] | Control | T2D     | Control<br>vs<br>T2D  |
| 281 | 543686.3327  | 3392150        | 0.1138926 | 317280         | 0.0204882 | 0661577<br>[PATH:ko00520] | Control | T2D     | Control<br>vs<br>T2D  |
| 284 | 126907.2606  | 539280         | 0.1145303 | 317228         | 0.0204903 | 0661575<br>[PATH:ko00660] | Control | T2D     | Control<br>vs<br>T2D  |
| 391 | 6821207.0556 | 678920         | 0.1111307 | 310690         | 0.0208497 | 0661577                   | Control | T2D     | Control<br>vs<br>T2D  |
| 390 | 192044.3023  | 3909910        | 0.1169537 | 300860         | 0.0213993 | 0662066                   | Control | T2D     | Control<br>vs<br>T2D  |
| 294 | 379607.9023  | 3045430        | 0.1139531 | 285620         | 0.0222701 | 0676342<br>[PATH:ko00620] | Control | T2D     | Control<br>vs<br>T2D  |
| 320 | 177269.3056  | 3917400        | 0.1181434 | 278328         | 0.0227000 | 0676342<br>[PATH:ko00061] | Control | T2D     | Control<br>vs<br>T2D  |
| 199 | 156155.0023  | 3583250        | 0.1130895 | 262210         | 0.0236803 | 0676342<br>[PATH:ko04112] | Control | T2D     | Control<br>vs<br>T2D  |
| 299 | 133882.2833  | 3070920        | 0.1113834 | 250820         | 0.0243905 | 0676342<br>[PATH:ko00910] | Control | T2D     | Control<br>vs<br>T2D  |
| 278 | 47804.8275   | 2868530        | 0.1278215 | 244160         | 0.0248205 | 0676342<br>[PATH:ko00333] | Control | T2D     | Control<br>vs<br>T2D  |
| 256 | 176722.9015  | 3492460        | 0.1143334 | 229660         | 0.0257700 | 0676342<br>[PATH:ko00340] | Control | T2D     | Control<br>vs<br>T2D  |
| 368 | 41420.4099   | 29046330       | 0.1302931 | 229308         | 0.0257904 | 0676342<br>[PATH:ko00362] | Control | T2D     | Control<br>vs<br>T2D  |
| 287 | 375800.7897  | 2684240        | 0.1199178 | 225210         | 0.0260601 | 0676342<br>[PATH:ko00052] | Control | T2D     | Control<br>vs<br>T2D  |
| 222 | 40343.0909   | 26221170       | 0.1184375 | 213920         | 0.0268300 | 0676342<br>[PATH:ko04066] | Control | T2D     | Control<br>vs<br>T2D  |
| 364 | 809598.0069  | 3866530        | 0.1123302 | 213568         | 0.0268505 | 0676342<br>[PATH:ko00230] | Control | T2D     | Control<br>vs<br>T2D  |
| 246 | 1242724.0752 | 3150600        | 0.1140820 | 210270         | 0.0270800 | 0676342<br>[PATH:ko00970] | Control | T2D     | Control<br>vs<br>T2D  |

|     | baseMean     | log2FoldChange | negLog10Pvalue | stat     | pvalue  | padj       | gene                                                     | g1      | g2      | compare          |
|-----|--------------|----------------|----------------|----------|---------|------------|----------------------------------------------------------|---------|---------|------------------|
| 374 | 122202.8724  | 1.94803        | 11.1321        | 0.520356 | 0.02755 | 0.0706763  | Drug metabolism - other enzymes [PATH:ko00983]           | Control | T2D     | Control vs T2D   |
| 365 | 644062.4824  | 1.89122        | 11.1303        | 1.920214 | 0.02765 | 0.06763    | Pyrimidine metabolism [PATH:ko00240]                     | Control | T2D     | Control vs T2D   |
| 389 | 39376.4934   | 1.74387        | 11.1246        | 1.420153 | 0.02769 | 0.06763    | Degradation of aromatic compounds                        | Control | T2D     | Control vs T2D   |
| 283 | 201350.0925  | 1.11003        | 11.1454        | 0.49212  | 0.02837 | 0.06763    | Butanoate metabolism [PATH:ko00650]                      | Control | T2D     | Control vs T2D   |
| 293 | 229437.8024  | 1.88987        | 11.1417        | 2.017993 | 0.02926 | 0.06763    | Propanoate metabolism [PATH:ko00640]                     | Control | T2D     | Control vs T2D   |
| 209 | 110632.9156  | 1.48644        | 11.1215        | 2.47852  | 0.02936 | 0.06763    | Biofilm formation - Vibrio cholerae [PATH:ko05111]       | Control | T2D     | Control vs T2D   |
| 334 | 170759.3562  | 1.06394        | 11.1518        | 2.17604  | 0.02955 | 0.06763    | Nicotinate and nicotinamide metabolism [PATH:ko00760]    | Control | T2D     | Control vs T2D   |
| 392 | 1850407.0348 | 1.5962         | 11.1429        | 2.47510  | 0.02962 | 0.06763    | Microbial metabolism in diverse environments             | Control | T2D     | Control vs T2D   |
| 235 | 192358.4024  | 1.88111        | 11.1460        | 2.01711  | 0.02992 | 0.06763    | RNA degradation [PATH:ko03018]                           | Control | T2D     | Control vs T2D   |
| 243 | 146391.9675  | 1.44012        | 11.1776        | 2.76028  | 0.03075 | 0.0506810  | Nucleotide excision repair [PATH:ko03420]                | Control | T2D     | Control vs T2D   |
| 331 | 122860.0727  | 1.28459        | 11.2666        | 2.61541  | 0.03122 | 0.0806810  | Biotin metabolism [PATH:ko00780]                         | Control | T2D     | Control vs T2D   |
| 252 | 130403.3027  | 1.82688        | 11.1534        | 2.81523  | 0.03136 | 0.0906810  | Arginine and proline metabolism [PATH:ko00330]           | Control | T2D     | Control vs T2D   |
| 458 | 51343.4178   | -              | 0.1485792      | -        | 0.03416 | 0.00690384 | Tyrosine metabolism [PATH:ko00350]                       | LADAC   | Control | LADAC vs Control |
| 342 | 77161.2102   | 1.46453        | 11.1150        | 2.91415  | 0.03223 | 0.0406906  | Vitamin B6 metabolism [PATH:ko00750]                     | Control | T2D     | Control vs T2D   |
| 566 | 23793.3043   | -              | 0.1631396      | -        | 0.03528 | 0.0270566  | Chloroalkane and chloroalkene degradation [PATH:ko00625] | LADAC   | Control | LADAC vs Control |
| 210 | 609155.5325  | 1.81158        | 11.1217        | 0.821207 | 0.03394 | 0.0717907  | Quorum sensing [PATH:ko02024]                            | Control | T2D     | Control vs T2D   |

|     | baseMean    | log2FoldChange | lfcSE     | negLog10Pvalue | padj       | gene                                                        | g1      | g2      | compare         |
|-----|-------------|----------------|-----------|----------------|------------|-------------------------------------------------------------|---------|---------|-----------------|
| 274 | 51850.3072  | 4.09535        | 0.114083  | 112052.03468   | 0.0072437  | Novobiocin biosynthesis<br>[PATH:ko00401]                   | Control | T2D     | Control vs T2D  |
| 219 | 18387.7027  | 1.45539        | 0.149432  | 6104988.03529  | 0.00725327 | AMPK signaling pathway<br>[PATH:ko04152]                    | Control | T2D     | Control vs T2D  |
| 251 | 372509.6823 | 386007.0       | 1.13617   | 10100040.03572 | 0.00725327 | Mannine, aspartate and glutamate metabolism [PATH:ko00250]  | Control | T2D     | Control vs T2D  |
| 255 | 329925.6723 | 373496.0       | 1.13217   | 10096402.03604 | 0.00725327 | Cysteine, serine and threonine metabolism [PATH:ko00260]    | Control | T2D     | Control vs T2D  |
| 535 | 68161.9513  | -              | 0.1689119 | -              | 0.0370487  | 733489<br>Riboflavin metabolism<br>[PATH:ko00740]           | LADA    | Control | LADA vs Control |
| 474 | 47804.8275  | -              | 0.1661656 | -              | 0.0378967  | 735070<br>Rodigosin biosynthesis<br>[PATH:ko00333]          | LADA    | Control | LADA vs Control |
| 498 | 165767.9102 | -              | 0.1640994 | -              | 0.0380020  | 735050<br>Sulfur metabolism<br>[PATH:ko00920]               | LADA    | Control | LADA vs Control |
| 547 | 40296.1565  | -              | 0.1543928 | -              | 0.0384900  | 735070<br>Taurine and hypotaurine metabolism [PATH:ko00430] | LADA    | Control | LADA vs Control |
| 585 | 39376.4934  | -              | 0.1620224 | -              | 0.0386287  | 735070<br>Degradation of aromatic compounds                 | LADA    | Control | LADA vs Control |
| 577 | 237.59291   | 3.837092       | 0.671962  | 1059200.03947  | 0.00743938 | Toluene degradation<br>[PATH:ko00623]                       | LADA    | Control | LADA vs Control |
| 413 | 190235.9724 | -              | 0.1459272 | -              | 0.0401769  | 749949<br>Bacterial secretion system<br>[PATH:ko03070]      | LADA    | Control | LADA vs Control |
| 455 | 69330.4338  | -              | 0.1618366 | -              | 0.0407804  | 754107<br>Phenylalanine metabolism<br>[PATH:ko00360]        | LADA    | Control | LADA vs Control |
| 347 | 53072.2312  | 2.382419       | 0.115053  | 7070700.03838  | 0.00763108 | D-Glutamine and D-glutamate metabolism [PATH:ko00471]       | Control | T2D     | Control vs T2D  |
| 300 | 328532.7623 | 288005.0       | 1.163227  | 1052860.04008  | 0.00767308 | Oxidative phosphorylation<br>[PATH:ko00190]                 | Control | T2D     | Control vs T2D  |

|     | baseMean    | log2FoldChange | lfcSE     | negLog10Pvalue | padj      | gene                                                      | g1      | g2      | compare         |
|-----|-------------|----------------|-----------|----------------|-----------|-----------------------------------------------------------|---------|---------|-----------------|
| 318 | 35807.7504  | 2.2451670      | 0.1195099 | 5.1436         | 0.0402205 | 076738                                                    | Control | T2D     | Control vs T2D  |
|     |             |                |           |                |           | Biosynthesis of unsaturated fatty acids [PATH:ko01040]    |         |         |                 |
| 238 | 248750.5062 | 2.75583        | 0.1158824 | 4.9996         | 0.0403609 | 076738                                                    | Control | T2D     | Control vs T2D  |
|     |             |                |           |                |           | DNA replication [PATH:ko03030]                            |         |         |                 |
| 227 | 33035.9265  | 2.493327       | 0.1216828 | 4.9004         | 0.0404608 | 076738                                                    | Control | T2D     | Control vs T2D  |
|     |             |                |           |                |           | Phosphatidylinositol signaling system [PATH:ko04070]      |         |         |                 |
| 262 | 51343.4178  | 2.336064       | 0.1142932 | 4.3922         | 0.0409603 | 076804                                                    | Control | T2D     | Control vs T2D  |
|     |             |                |           |                |           | Tyrosine metabolism [PATH:ko00350]                        |         |         |                 |
| 382 | 13015.2065  | 2.053301       | 0.1990327 | 3.6500         | 0.0417002 | 077309                                                    | Control | T2D     | Control vs T2D  |
|     |             |                |           |                |           | Xylene degradation [PATH:ko00622]                         |         |         |                 |
| 415 | 18387.7027  | -              | 0.1942596 | -              | 0.0428161 | 077954                                                    | LADA    | Control | LADA vs Control |
|     | 0.3934727   |                | 2.025500  |                |           | AMPK signaling pathway [PATH:ko04152]                     |         |         |                 |
| 514 | 35807.7547  | -              | 0.1553606 | -              | 0.0429504 | 077954                                                    | LADA    | Control | LADA vs Control |
|     | 0.3144737   |                | 2.024153  |                |           | Biosynthesis of unsaturated fatty acids [PATH:ko01040]    |         |         |                 |
| 289 | 251341.3023 | 2.23220        | 0.1149925 | 2.0288         | 0.0433565 | 079480                                                    | Control | T2D     | Control vs T2D  |
|     |             |                |           |                |           | Glyoxylate and dicarboxylate metabolism [PATH:ko00630]    |         |         |                 |
| 570 | 122202.8726 | -              | 0.1471796 | -              | 0.0448904 | 080723                                                    | LADA    | Control | LADA vs Control |
|     | 0.2951924   |                | 2.005661  |                |           | Drug metabolism - other enzymes [PATH:ko00983]            |         |         |                 |
| 517 | 62032.3100  | -              | 0.1618218 | -              | 0.0459308 | 081604                                                    | LADA    | Control | LADA vs Control |
|     | 0.3230009   |                | 1.996028  |                |           | Fatty acid degradation [PATH:ko00071]                     |         |         |                 |
| 494 | 363521.1595 | -              | 0.2611697 | -              | 0.0462109 | 081604                                                    | LADA    | Control | LADA vs Control |
|     | 0.5206225   |                | 1.993426  |                |           | Methane metabolism [PATH:ko00680]                         |         |         |                 |
| 564 | 41420.4099  | -              | 0.1693785 | -              | 0.0469001 | 082078                                                    | LADA    | Control | LADA vs Control |
|     | 0.3365861   |                | 1.987183  |                |           | Benzoate degradation [PATH:ko00362]                       |         |         |                 |
| 904 | 726.81271   | 6.271311       | 0.5469625 | 7.4810         | 0.0029307 | 082087                                                    | LADA    | T1D     | LADA vs T1D     |
|     |             |                |           |                |           | Alpha-Linolenic acid metabolism [PATH:ko00592]            |         |         |                 |
| 330 | 13542.6964  | 2.8006716      | 0.1510856 | 9.00076        | 0.0465807 | 082838                                                    | Control | T2D     | Control vs T2D  |
|     |             |                |           |                |           | Synthesis and degradation of ketone bodies [PATH:ko00072] |         |         |                 |
| 258 | 39888.8722  | 2.789747       | 0.1403554 | 9.87630        | 0.0468506 | 082838                                                    | Control | T2D     | Control vs T2D  |
|     |             |                |           |                |           | Lysine degradation [PATH:ko00310]                         |         |         |                 |

|     | baseMean     | log2FoldChange | negLog10Pvalue | stat      | pvalue    | padj      | gene                                                                        | g1      | g2      | compare          |
|-----|--------------|----------------|----------------|-----------|-----------|-----------|-----------------------------------------------------------------------------|---------|---------|------------------|
| 363 | 17603.1772   | 4.2452567      | 1.1237194      | 982360    | 0.0474387 | 0.0828378 | Seratin biosynthesis<br>[PATH:ko00908]                                      | Control | T2D     | Control vs T2D   |
| 388 | 1023857.9730 | 3.3367         | 1.1162085      | 982098    | 0.0474683 | 0.0828378 | Carbon metabolism                                                           | Control | T2D     | Control vs T2D   |
| 380 | 9097.0503    | 3.3989945      | 1.2015042      | 980080    | 0.0476905 | 0.0828358 | Styrene degradation<br>[PATH:ko00643]                                       | Control | T2D     | Control vs T2D   |
| 371 | 2818.5689    | 4.4684353      | 1.2371689      | 975118    | 0.0482564 | 0.0829389 | Chlorocyclohexane and chlorobenzene degradation<br>[PATH:ko00361]           | Control | T2D     | Control vs T2D   |
| 527 | 122860.0732  | - 0.1646582    | - 0.0480607    | 0.7831633 | 0.0480607 | 0.0831633 | Biotin metabolism<br>[PATH:ko00780]                                         | LADAC   | Control | LADAC vs Control |
| 426 | 565135.9901  | - 0.1659116    | - 0.0483705    | 0.7831633 | 0.0483705 | 0.0831633 | Two-component system<br>[PATH:ko02020]                                      | LADAC   | Control | LADAC vs Control |
| 576 | 9097.0503    | - 0.2619530    | - 0.0493200    | 0.8406558 | 0.0493200 | 0.0840655 | Styrene degradation<br>[PATH:ko00643]                                       | LADAC   | Control | LADAC vs Control |
| 410 | 63429.4212   | - 0.1732376    | - 0.0508860    | 0.8597999 | 0.0508860 | 0.0859799 | Peroxisome [PATH:ko04146]                                                   | LADAC   | Control | LADAC vs Control |
| 405 | 110632.9151  | - 0.1580512    | - 0.0518104    | 0.8679668 | 0.0518104 | 0.0867966 | Biofilm formation - Vibrio cholerae [PATH:ko05111]                          | LADAC   | Control | LADAC vs Control |
| 506 | 175.3137     | 1.0936550      | 1.5702890      | 1.7720    | 0.0551464 | 0.0910330 | Mannose type O-glycan biosynthesis [PATH:ko00515]                           | LADAC   | Control | LADAC vs Control |
| 481 | 205734.1088  | - 0.1632264    | - 0.0552700    | 0.9103800 | 0.0552700 | 0.0910380 | Tricarbate cycle (TCA cycle)<br>[PATH:ko00020]                              | LADAC   | Control | LADAC vs Control |
| 261 | 21549.3032   | 3.2628463      | 1.1361650      | 1.303340  | 0.0535603 | 0.0911146 | Tryptophan metabolism<br>[PATH:ko00380]                                     | Control | T2D     | Control vs T2D   |
| 337 | 223648.1632  | 3.33404        | 1.1378882      | 1.209810  | 0.0561570 | 0.0945510 | Porphyrin and chlorophyll metabolism [PATH:ko00860]                         | Control | T2D     | Control vs T2D   |
| 248 | 964710.8022  | 2.07059        | 1.1168591      | 1.888650  | 0.0589387 | 0.0981236 | 30S ribosome [PATH:ko03010]                                                 | Control | T2D     | Control vs T2D   |
| 280 | 35023.1732   | 3.160469       | 1.1146313      | 1.884710  | 0.0594688 | 0.0981236 | Tryptopane, piperidine and pyridine alkaloid biosynthesis<br>[PATH:ko00960] | Control | T2D     | Control vs T2D   |



|     | baseMean    | log2FoldChange | negLog10Pvalue  | stat   | pvalue | padj     | gene                                        | g1      | g2  | compare              |
|-----|-------------|----------------|-----------------|--------|--------|----------|---------------------------------------------|---------|-----|----------------------|
| 372 | 12380.6572  | 2814862.204041 | 16869640.061538 | 809965 | 1.0    | 0.000000 | Dioxin degradation<br>[PATH:ko00621]        | Control | T2D | Control<br>vs<br>T2D |
| 279 | 139233.4052 | 252978.120535  | 12869140.061600 | 509965 | 1.0    | 0.000000 | Streptomycin biosynthesis<br>[PATH:ko00521] | Control | T2D | Control<br>vs<br>T2D |

```
kable(stat_sig[,c(5:7,10)])
```

|     | pvalue    | padj      | gene                                                                         | compare            |
|-----|-----------|-----------|------------------------------------------------------------------------------|--------------------|
| 895 | 0.0000354 | 0.0069458 | Glycosphingolipid biosynthesis - lacto and neolacto series<br>[PATH:ko00601] | LADA vs<br>T1D     |
| 552 | 0.0001449 | 0.0162870 | Geraniol degradation [PATH:ko00281]                                          | LADA vs<br>Control |
| 512 | 0.0001662 | 0.0162870 | alpha-Linolenic acid metabolism [PATH:ko00592]                               | LADA vs<br>Control |
| 571 | 0.0007520 | 0.0333090 | Ethylbenzene degradation [PATH:ko00642]                                      | LADA vs<br>Control |
| 466 | 0.0010929 | 0.0333090 | Glucosinolate biosynthesis [PATH:ko00966]                                    | LADA vs<br>Control |
| 459 | 0.0014467 | 0.0333090 | Valine, leucine and isoleucine biosynthesis [PATH:ko00290]                   | LADA vs<br>Control |
| 579 | 0.0015375 | 0.0333090 | 2-Oxocarboxylic acid metabolism                                              | LADA vs<br>Control |
| 472 | 0.0015836 | 0.0333090 | Phenazine biosynthesis [PATH:ko00405]                                        | LADA vs<br>Control |
| 515 | 0.0016076 | 0.0333090 | Ether lipid metabolism [PATH:ko00565]                                        | LADA vs<br>Control |
| 536 | 0.0016305 | 0.0333090 | Thiamine metabolism [PATH:ko00730]                                           | LADA vs<br>Control |
| 456 | 0.0018916 | 0.0333090 | Phenylalanine, tyrosine and tryptophan biosynthesis<br>[PATH:ko00400]        | LADA vs<br>Control |
| 532 | 0.0020387 | 0.0333090 | Pantothenate and CoA biosynthesis [PATH:ko00770]                             | LADA vs<br>Control |
| 580 | 0.0020393 | 0.0333090 | Biosynthesis of amino acids                                                  | LADA vs<br>Control |
| 480 | 0.0023361 | 0.0346055 | C5-Branched dibasic acid metabolism [PATH:ko00660]                           | LADA vs<br>Control |
| 497 | 0.0026162 | 0.0346055 | Photosynthesis [PATH:ko00195]                                                | LADA vs<br>Control |
| 449 | 0.0030970 | 0.0346055 | Arginine biosynthesis [PATH:ko00220]                                         | LADA vs<br>Control |
| 518 | 0.0034891 | 0.0346055 | Glycerolipid metabolism [PATH:ko00561]                                       | LADA vs<br>Control |
| 488 | 0.0036136 | 0.0346055 | Pentose phosphate pathway [PATH:ko00030]                                     | LADA vs<br>Control |
| 442 | 0.0036957 | 0.0346055 | Aminoacyl-tRNA biosynthesis [PATH:ko00970]                                   | LADA vs<br>Control |
| 453 | 0.0037616 | 0.0346055 | Lysine biosynthesis [PATH:ko00300]                                           | LADA vs<br>Control |

|     | pvalue    | padj      | gene                                                                      | compare         |
|-----|-----------|-----------|---------------------------------------------------------------------------|-----------------|
| 581 | 0.0042931 | 0.0346055 | Biosynthesis of antibiotics                                               | LADA vs Control |
| 475 | 0.0043675 | 0.0346055 | Streptomycin biosynthesis [PATH:ko00521]                                  | LADA vs Control |
| 558 | 0.0045024 | 0.0346055 | Terpenoid backbone biosynthesis [PATH:ko00900]                            | LADA vs Control |
| 439 | 0.0047446 | 0.0346055 | Nucleotide excision repair [PATH:ko03420]                                 | LADA vs Control |
| 546 | 0.0047919 | 0.0346055 | Selenocompound metabolism [PATH:ko00450]                                  | LADA vs Control |
| 492 | 0.0048108 | 0.0346055 | Carbon fixation in photosynthetic organisms [PATH:ko00710]                | LADA vs Control |
| 450 | 0.0049114 | 0.0346055 | Cysteine and methionine metabolism [PATH:ko00270]                         | LADA vs Control |
| 464 | 0.0051318 | 0.0346055 | Carbapenem biosynthesis [PATH:ko00332]                                    | LADA vs Control |
| 582 | 0.0052285 | 0.0346055 | Biosynthesis of secondary metabolites                                     | LADA vs Control |
| 434 | 0.0053967 | 0.0346055 | DNA replication [PATH:ko03030]                                            | LADA vs Control |
| 437 | 0.0054656 | 0.0346055 | Mismatch repair [PATH:ko03430]                                            | LADA vs Control |
| 556 | 0.0057776 | 0.0346055 | Polyketide sugar unit biosynthesis [PATH:ko00523]                         | LADA vs Control |
| 588 | 0.0058607 | 0.0346055 | Microbial metabolism in diverse environments                              | LADA vs Control |
| 399 | 0.0059859 | 0.0346055 | Necroptosis [PATH:ko04217]                                                | LADA vs Control |
| 468 | 0.0063136 | 0.0346055 | Monobactam biosynthesis [PATH:ko00261]                                    | LADA vs Control |
| 510 | 0.0067198 | 0.0346055 | Peptidoglycan biosynthesis [PATH:ko00550]                                 | LADA vs Control |
| 452 | 0.0067429 | 0.0346055 | Histidine metabolism [PATH:ko00340]                                       | LADA vs Control |
| 560 | 0.0071435 | 0.0346055 | Purine metabolism [PATH:ko00230]                                          | LADA vs Control |
| 451 | 0.0072330 | 0.0346055 | Glycine, serine and threonine metabolism [PATH:ko00260]                   | LADA vs Control |
| 429 | 0.0073488 | 0.0346055 | Protein export [PATH:ko03060]                                             | LADA vs Control |
| 447 | 0.0074117 | 0.0346055 | Alanine, aspartate and glutamate metabolism [PATH:ko00250]                | LADA vs Control |
| 587 | 0.0078966 | 0.0346055 | Metabolic pathways                                                        | LADA vs Control |
| 561 | 0.0081670 | 0.0346055 | Pyrimidine metabolism [PATH:ko00240]                                      | LADA vs Control |
| 503 | 0.0082172 | 0.0346055 | Glycosphingolipid biosynthesis - lacto and neolacto series [PATH:ko00601] | LADA vs Control |
| 470 | 0.0084018 | 0.0346055 | Novobiocin biosynthesis [PATH:ko00401]                                    | LADA vs Control |
| 444 | 0.0084422 | 0.0346055 | Ribosome [PATH:ko03010]                                                   | LADA vs Control |

|     | pvalue    | padj      | gene                                                  | compare         |
|-----|-----------|-----------|-------------------------------------------------------|-----------------|
| 543 | 0.0085715 | 0.0346055 | D-Glutamine and D-glutamate metabolism [PATH:ko00471] | LADA vs Control |
| 484 | 0.0085968 | 0.0346055 | Glycolysis / Gluconeogenesis [PATH:ko00010]           | LADA vs Control |
| 406 | 0.0086998 | 0.0346055 | Quorum sensing [PATH:ko02024]                         | LADA vs Control |
| 548 | 0.0092733 | 0.0346055 | Biosynthesis of ansamycins [PATH:ko01051]             | LADA vs Control |
| 584 | 0.0093098 | 0.0346055 | Carbon metabolism                                     | LADA vs Control |
| 538 | 0.0093267 | 0.0346055 | Vitamin B6 metabolism [PATH:ko00750]                  | LADA vs Control |
| 395 | 0.0093611 | 0.0346055 | Cell cycle - Caulobacter [PATH:ko04112]               | LADA vs Control |
| 441 | 0.0094888 | 0.0346055 | RNA polymerase [PATH:ko03020]                         | LADA vs Control |
| 431 | 0.0095968 | 0.0346055 | RNA degradation [PATH:ko03018]                        | LADA vs Control |
| 530 | 0.0098505 | 0.0346055 | Nicotinate and nicotinamide metabolism [PATH:ko00760] | LADA vs Control |
| 436 | 0.0098873 | 0.0346055 | Homologous recombination [PATH:ko03440]               | LADA vs Control |
| 854 | 0.0004749 | 0.0358391 | Betalain biosynthesis [PATH:ko00965]                  | LADA vs T1D     |
| 837 | 0.0005486 | 0.0358391 | Ribosome biogenesis in eukaryotes [PATH:ko03008]      | LADA vs T1D     |
| 432 | 0.0107440 | 0.0369444 | Sulfur relay system [PATH:ko04122]                    | LADA vs Control |
| 486 | 0.0109597 | 0.0369488 | Inositol phosphate metabolism [PATH:ko00562]          | LADA vs Control |
| 483 | 0.0111223 | 0.0369488 | Galactose metabolism [PATH:ko00052]                   | LADA vs Control |
| 489 | 0.0116283 | 0.0379856 | Propanoate metabolism [PATH:ko00640]                  | LADA vs Control |
| 478 | 0.0121652 | 0.0386411 | Ascorbate and aldarate metabolism [PATH:ko00053]      | LADA vs Control |
| 531 | 0.0122232 | 0.0386411 | One carbon pool by folate [PATH:ko00670]              | LADA vs Control |
| 519 | 0.0125377 | 0.0390061 | Glycerophospholipid metabolism [PATH:ko00564]         | LADA vs Control |
| 8   | 0.0002559 | 0.0390382 | Bacterial chemotaxis [PATH:ko02030]                   | Control vs T1D  |
| 9   | 0.0003983 | 0.0390382 | Flagellar assembly [PATH:ko02040]                     | Control vs T1D  |
| 461 | 0.0127739 | 0.0391200 | Acarbose and validamycin biosynthesis [PATH:ko00525]  | LADA vs Control |
| 495 | 0.0136810 | 0.0408927 | Nitrogen metabolism [PATH:ko00910]                    | LADA vs Control |
| 482 | 0.0137700 | 0.0408927 | Fructose and mannose metabolism [PATH:ko00051]        | LADA vs Control |
| 418 | 0.0147613 | 0.0431823 | HIF-1 signaling pathway [PATH:ko04066]                | LADA vs Control |

|     | pvalue    | padj      | gene                                                                  | compare         |
|-----|-----------|-----------|-----------------------------------------------------------------------|-----------------|
| 462 | 0.0151820 | 0.0437599 | Betalain biosynthesis [PATH:ko00965]                                  | LADA vs Control |
| 423 | 0.0157014 | 0.0442859 | Phosphatidylinositol signaling system [PATH:ko04070]                  | LADA vs Control |
| 412 | 0.0158164 | 0.0442859 | ABC transporters [PATH:ko02010]                                       | LADA vs Control |
| 433 | 0.0161830 | 0.0446743 | Base excision repair [PATH:ko03410]                                   | LADA vs Control |
| 573 | 0.0167594 | 0.0450038 | Metabolism of xenobiotics by cytochrome P450 [PATH:ko00980]           | LADA vs Control |
| 569 | 0.0167616 | 0.0450038 | Drug metabolism - cytochrome P450 [PATH:ko00982]                      | LADA vs Control |
| 491 | 0.0188318 | 0.0493905 | Starch and sucrose metabolism [PATH:ko00500]                          | LADA vs Control |
| 408 | 0.0188994 | 0.0493905 | Autophagy - yeast [PATH:ko04138]                                      | LADA vs Control |
| 477 | 0.0191645 | 0.0494243 | Amino sugar and nucleotide sugar metabolism [PATH:ko00520]            | LADA vs Control |
| 490 | 0.0204551 | 0.0517856 | Pyruvate metabolism [PATH:ko00620]                                    | LADA vs Control |
| 476 | 0.0206085 | 0.0517856 | Tropane, piperidine and pyridine alkaloid biosynthesis [PATH:ko00960] | LADA vs Control |
| 550 | 0.0213722 | 0.0530248 | Biosynthesis of vancomycin group antibiotics [PATH:ko01055]           | LADA vs Control |
| 533 | 0.0226272 | 0.0549700 | Porphyrin and chlorophyll metabolism [PATH:ko00860]                   | LADA vs Control |
| 516 | 0.0227172 | 0.0549700 | Fatty acid biosynthesis [PATH:ko00061]                                | LADA vs Control |
| 446 | 0.0230254 | 0.0550363 | RNA transport [PATH:ko03013]                                          | LADA vs Control |
| 586 | 0.0240073 | 0.0566919 | Fatty acid metabolism                                                 | LADA vs Control |
| 521 | 0.0245535 | 0.0569158 | Primary bile acid biosynthesis [PATH:ko00120]                         | LADA vs Control |
| 414 | 0.0246829 | 0.0569158 | Phosphotransferase system (PTS) [PATH:ko02060]                        | LADA vs Control |
| 445 | 0.0252415 | 0.0574628 | Ribosome biogenesis in eukaryotes [PATH:ko03008]                      | LADA vs Control |
| 539 | 0.0259727 | 0.0574628 | beta-Alanine metabolism [PATH:ko00410]                                | LADA vs Control |
| 479 | 0.0262357 | 0.0574628 | Butanoate metabolism [PATH:ko00650]                                   | LADA vs Control |
| 485 | 0.0263113 | 0.0574628 | Glyoxylate and dicarboxylate metabolism [PATH:ko00630]                | LADA vs Control |
| 522 | 0.0266088 | 0.0574628 | Secondary bile acid biosynthesis [PATH:ko00121]                       | LADA vs Control |
| 528 | 0.0269822 | 0.0574628 | Folate biosynthesis [PATH:ko00790]                                    | LADA vs Control |
| 559 | 0.0272008 | 0.0574628 | Zeatin biosynthesis [PATH:ko00908]                                    | LADA vs Control |
| 493 | 0.0275005 | 0.0574628 | Carbon fixation pathways in prokaryotes [PATH:ko00720]                | LADA vs Control |

|     | pvalue    | padj      | gene                                                       | compare         |
|-----|-----------|-----------|------------------------------------------------------------|-----------------|
| 496 | 0.0275587 | 0.0574628 | Oxidative phosphorylation [PATH:ko00190]                   | LADA vs Control |
| 236 | 0.0039485 | 0.0629443 | Sulfur relay system [PATH:ko04122]                         | Control vs T2D  |
| 322 | 0.0040520 | 0.0629443 | Glycerolipid metabolism [PATH:ko00561]                     | Control vs T2D  |
| 366 | 0.0041526 | 0.0629443 | Aminobenzoate degradation [PATH:ko00627]                   | Control vs T2D  |
| 230 | 0.0045253 | 0.0629443 | Two-component system [PATH:ko02020]                        | Control vs T2D  |
| 207 | 0.0046159 | 0.0629443 | Biofilm formation - Escherichia coli [PATH:ko02026]        | Control vs T2D  |
| 314 | 0.0049509 | 0.0629443 | Peptidoglycan biosynthesis [PATH:ko00550]                  | Control vs T2D  |
| 323 | 0.0052216 | 0.0629443 | Glycerophospholipid metabolism [PATH:ko00564]              | Control vs T2D  |
| 301 | 0.0056442 | 0.0629443 | Photosynthesis [PATH:ko00195]                              | Control vs T2D  |
| 218 | 0.0056557 | 0.0629443 | Phosphotransferase system (PTS) [PATH:ko02060]             | Control vs T2D  |
| 352 | 0.0058911 | 0.0629443 | Biosynthesis of ansamycins [PATH:ko01051]                  | Control vs T2D  |
| 302 | 0.0071873 | 0.0629443 | Sulfur metabolism [PATH:ko00920]                           | Control vs T2D  |
| 370 | 0.0081464 | 0.0629443 | Chloroalkane and chloroalkene degradation [PATH:ko00625]   | Control vs T2D  |
| 336 | 0.0086860 | 0.0629443 | Pantothenate and CoA biosynthesis [PATH:ko00770]           | Control vs T2D  |
| 288 | 0.0093897 | 0.0629443 | Glycolysis / Gluconeogenesis [PATH:ko00010]                | Control vs T2D  |
| 345 | 0.0096014 | 0.0629443 | D-Alanine metabolism [PATH:ko00473]                        | Control vs T2D  |
| 340 | 0.0096686 | 0.0629443 | Thiamine metabolism [PATH:ko00730]                         | Control vs T2D  |
| 203 | 0.0098607 | 0.0629443 | Necroptosis [PATH:ko04217]                                 | Control vs T2D  |
| 296 | 0.0102169 | 0.0629443 | Carbon fixation in photosynthetic organisms [PATH:ko00710] | Control vs T2D  |
| 276 | 0.0104857 | 0.0629443 | Phenazine biosynthesis [PATH:ko00405]                      | Control vs T2D  |
| 241 | 0.0108697 | 0.0629443 | Mismatch repair [PATH:ko03430]                             | Control vs T2D  |
| 216 | 0.0110469 | 0.0629443 | ABC transporters [PATH:ko02010]                            | Control vs T2D  |
| 263 | 0.0115943 | 0.0629443 | Valine, leucine and isoleucine biosynthesis [PATH:ko00290] | Control vs T2D  |
| 286 | 0.0118980 | 0.0629443 | Fructose and mannose metabolism [PATH:ko00051]             | Control vs T2D  |
| 295 | 0.0120571 | 0.0629443 | Starch and sucrose metabolism [PATH:ko00500]               | Control vs T2D  |
| 343 | 0.0123800 | 0.0629443 | beta-Alanine metabolism [PATH:ko00410]                     | Control vs T2D  |

|     | pvalue    | padj      | gene                                                               | compare        |
|-----|-----------|-----------|--------------------------------------------------------------------|----------------|
| 272 | 0.0124246 | 0.0629443 | Monobactam biosynthesis [PATH:ko00261]                             | Control vs T2D |
| 233 | 0.0125229 | 0.0629443 | Protein export [PATH:ko03060]                                      | Control vs T2D |
| 260 | 0.0126419 | 0.0629443 | Phenylalanine, tyrosine and tryptophan biosynthesis [PATH:ko00400] | Control vs T2D |
| 384 | 0.0127064 | 0.0629443 | Biosynthesis of amino acids                                        | Control vs T2D |
| 208 | 0.0129311 | 0.0629443 | Biofilm formation - Pseudomonas aeruginosa [PATH:ko02025]          | Control vs T2D |
| 350 | 0.0132910 | 0.0629443 | Selenocompound metabolism [PATH:ko00450]                           | Control vs T2D |
| 237 | 0.0146192 | 0.0629443 | Base excision repair [PATH:ko03410]                                | Control vs T2D |
| 383 | 0.0148318 | 0.0629443 | 2-Oxocarboxylic acid metabolism                                    | Control vs T2D |
| 217 | 0.0148552 | 0.0629443 | Bacterial secretion system [PATH:ko03070]                          | Control vs T2D |
| 362 | 0.0150679 | 0.0629443 | Terpenoid backbone biosynthesis [PATH:ko00900]                     | Control vs T2D |
| 378 | 0.0152764 | 0.0629443 | Naphthalene degradation [PATH:ko00626]                             | Control vs T2D |
| 386 | 0.0154866 | 0.0629443 | Biosynthesis of secondary metabolites                              | Control vs T2D |
| 292 | 0.0155954 | 0.0629443 | Pentose phosphate pathway [PATH:ko00030]                           | Control vs T2D |
| 268 | 0.0160134 | 0.0629443 | Carbapenem biosynthesis [PATH:ko00332]                             | Control vs T2D |
| 270 | 0.0163201 | 0.0629443 | Glucosinolate biosynthesis [PATH:ko00966]                          | Control vs T2D |
| 335 | 0.0163756 | 0.0629443 | One carbon pool by folate [PATH:ko00670]                           | Control vs T2D |
| 253 | 0.0164656 | 0.0629443 | Arginine biosynthesis [PATH:ko00220]                               | Control vs T2D |
| 240 | 0.0168177 | 0.0629443 | Homologous recombination [PATH:ko03440]                            | Control vs T2D |
| 257 | 0.0168290 | 0.0629443 | Lysine biosynthesis [PATH:ko00300]                                 | Control vs T2D |
| 204 | 0.0174619 | 0.0629443 | Bacterial chemotaxis [PATH:ko02030]                                | Control vs T2D |
| 254 | 0.0176013 | 0.0629443 | Cysteine and methionine metabolism [PATH:ko00270]                  | Control vs T2D |
| 385 | 0.0179296 | 0.0629443 | Biosynthesis of antibiotics                                        | Control vs T2D |
| 205 | 0.0183278 | 0.0630017 | Flagellar assembly [PATH:ko02040]                                  | Control vs T2D |
| 944 | 0.0014410 | 0.0632892 | Geraniol degradation [PATH:ko00281]                                | LADA vs T1D    |
| 838 | 0.0016859 | 0.0632892 | RNA transport [PATH:ko03013]                                       | LADA vs T1D    |
| 833 | 0.0019374 | 0.0632892 | RNA polymerase [PATH:ko03020]                                      | LADA vs T1D    |

|     | pvalue    | padj      | gene                                                                  | compare         |
|-----|-----------|-----------|-----------------------------------------------------------------------|-----------------|
| 541 | 0.0311438 | 0.0642547 | D-Alanine metabolism [PATH:ko00473]                                   | LADA vs Control |
| 467 | 0.0315114 | 0.0643358 | Isoquinoline alkaloid biosynthesis [PATH:ko00950]                     | LADA vs Control |
| 267 | 0.0196938 | 0.0661577 | Biosynthesis of various secondary metabolites - part 1 [PATH:ko00999] | Control vs T2D  |
| 281 | 0.0204882 | 0.0661577 | Amino sugar and nucleotide sugar metabolism [PATH:ko00520]            | Control vs T2D  |
| 284 | 0.0204913 | 0.0661577 | C5-Branched dibasic acid metabolism [PATH:ko00660]                    | Control vs T2D  |
| 391 | 0.0208497 | 0.0661577 | Metabolic pathways                                                    | Control vs T2D  |
| 390 | 0.0213993 | 0.0666206 | Fatty acid metabolism                                                 | Control vs T2D  |
| 294 | 0.0222761 | 0.0676342 | Pyruvate metabolism [PATH:ko00620]                                    | Control vs T2D  |
| 320 | 0.0227070 | 0.0676342 | Fatty acid biosynthesis [PATH:ko00061]                                | Control vs T2D  |
| 199 | 0.0236843 | 0.0676342 | Cell cycle - Caulobacter [PATH:ko04112]                               | Control vs T2D  |
| 299 | 0.0243965 | 0.0676342 | Nitrogen metabolism [PATH:ko00910]                                    | Control vs T2D  |
| 278 | 0.0248215 | 0.0676342 | Prodigiosin biosynthesis [PATH:ko00333]                               | Control vs T2D  |
| 256 | 0.0257700 | 0.0676342 | Histidine metabolism [PATH:ko00340]                                   | Control vs T2D  |
| 368 | 0.0257934 | 0.0676342 | Benzoate degradation [PATH:ko00362]                                   | Control vs T2D  |
| 287 | 0.0260671 | 0.0676342 | Galactose metabolism [PATH:ko00052]                                   | Control vs T2D  |
| 222 | 0.0268340 | 0.0676342 | HIF-1 signaling pathway [PATH:ko04066]                                | Control vs T2D  |
| 364 | 0.0268585 | 0.0676342 | Purine metabolism [PATH:ko00230]                                      | Control vs T2D  |
| 246 | 0.0270860 | 0.0676342 | Aminoacyl-tRNA biosynthesis [PATH:ko00970]                            | Control vs T2D  |
| 374 | 0.0275547 | 0.0676342 | Drug metabolism - other enzymes [PATH:ko00983]                        | Control vs T2D  |
| 365 | 0.0276553 | 0.0676342 | Pyrimidine metabolism [PATH:ko00240]                                  | Control vs T2D  |
| 389 | 0.0276979 | 0.0676342 | Degradation of aromatic compounds                                     | Control vs T2D  |
| 283 | 0.0283702 | 0.0676342 | Butanoate metabolism [PATH:ko00650]                                   | Control vs T2D  |
| 293 | 0.0292621 | 0.0676342 | Propanoate metabolism [PATH:ko00640]                                  | Control vs T2D  |
| 209 | 0.0293667 | 0.0676342 | Biofilm formation - Vibrio cholerae [PATH:ko05111]                    | Control vs T2D  |
| 334 | 0.0295520 | 0.0676342 | Nicotinate and nicotinamide metabolism [PATH:ko00760]                 | Control vs T2D  |
| 392 | 0.0296219 | 0.0676342 | Microbial metabolism in diverse environments                          | Control vs T2D  |

|     | pvalue    | padj      | gene                                                       | compare         |
|-----|-----------|-----------|------------------------------------------------------------|-----------------|
| 235 | 0.0299230 | 0.0676342 | RNA degradation [PATH:ko03018]                             | Control vs T2D  |
| 243 | 0.0307505 | 0.0681056 | Nucleotide excision repair [PATH:ko03420]                  | Control vs T2D  |
| 331 | 0.0312298 | 0.0681056 | Biotin metabolism [PATH:ko00780]                           | Control vs T2D  |
| 252 | 0.0313699 | 0.0681056 | Arginine and proline metabolism [PATH:ko00330]             | Control vs T2D  |
| 458 | 0.0341670 | 0.0690384 | Tyrosine metabolism [PATH:ko00350]                         | LADA vs Control |
| 342 | 0.0322314 | 0.0690674 | Vitamin B6 metabolism [PATH:ko00750]                       | Control vs T2D  |
| 566 | 0.0352832 | 0.0705663 | Chloroalkane and chloroalkene degradation [PATH:ko00625]   | LADA vs Control |
| 210 | 0.0339407 | 0.0717977 | Quorum sensing [PATH:ko02024]                              | Control vs T2D  |
| 274 | 0.0346820 | 0.0724371 | Novobiocin biosynthesis [PATH:ko00401]                     | Control vs T2D  |
| 219 | 0.0352923 | 0.0725327 | AMPK signaling pathway [PATH:ko04152]                      | Control vs T2D  |
| 251 | 0.0357249 | 0.0725327 | Alanine, aspartate and glutamate metabolism [PATH:ko00250] | Control vs T2D  |
| 255 | 0.0360466 | 0.0725327 | Glycine, serine and threonine metabolism [PATH:ko00260]    | Control vs T2D  |
| 535 | 0.0370487 | 0.0733489 | Riboflavin metabolism [PATH:ko00740]                       | LADA vs Control |
| 474 | 0.0378937 | 0.0735070 | Prodigiosin biosynthesis [PATH:ko00333]                    | LADA vs Control |
| 498 | 0.0380020 | 0.0735070 | Sulfur metabolism [PATH:ko00920]                           | LADA vs Control |
| 547 | 0.0384996 | 0.0735070 | Taurine and hypotaurine metabolism [PATH:ko00430]          | LADA vs Control |
| 585 | 0.0386287 | 0.0735070 | Degradation of aromatic compounds                          | LADA vs Control |
| 577 | 0.0394743 | 0.0743938 | Toluene degradation [PATH:ko00623]                         | LADA vs Control |
| 413 | 0.0401759 | 0.0749949 | Bacterial secretion system [PATH:ko03070]                  | LADA vs Control |
| 455 | 0.0407834 | 0.0754107 | Phenylalanine metabolism [PATH:ko00360]                    | LADA vs Control |
| 347 | 0.0383866 | 0.0763108 | D-Glutamine and D-glutamate metabolism [PATH:ko00471]      | Control vs T2D  |
| 300 | 0.0400861 | 0.0767378 | Oxidative phosphorylation [PATH:ko00190]                   | Control vs T2D  |
| 318 | 0.0402245 | 0.0767378 | Biosynthesis of unsaturated fatty acids [PATH:ko01040]     | Control vs T2D  |
| 238 | 0.0403649 | 0.0767378 | DNA replication [PATH:ko03030]                             | Control vs T2D  |
| 227 | 0.0404618 | 0.0767378 | Phosphatidylinositol signaling system [PATH:ko04070]       | Control vs T2D  |
| 262 | 0.0409613 | 0.0768024 | Tyrosine metabolism [PATH:ko00350]                         | Control vs T2D  |



|     | pvalue    | padj      | gene                                                                  | compare         |
|-----|-----------|-----------|-----------------------------------------------------------------------|-----------------|
| 382 | 0.0417002 | 0.0773094 | Xylene degradation [PATH:ko00622]                                     | Control vs T2D  |
| 415 | 0.0428161 | 0.0779543 | AMPK signaling pathway [PATH:ko04152]                                 | LADA vs Control |
| 514 | 0.0429544 | 0.0779543 | Biosynthesis of unsaturated fatty acids [PATH:ko01040]                | LADA vs Control |
| 289 | 0.0433535 | 0.0794814 | Glyoxylate and dicarboxylate metabolism [PATH:ko00630]                | Control vs T2D  |
| 570 | 0.0448924 | 0.0807239 | Drug metabolism - other enzymes [PATH:ko00983]                        | LADA vs Control |
| 517 | 0.0459308 | 0.0816046 | Fatty acid degradation [PATH:ko00071]                                 | LADA vs Control |
| 494 | 0.0462149 | 0.0816046 | Methane metabolism [PATH:ko00680]                                     | LADA vs Control |
| 564 | 0.0469021 | 0.0820786 | Benzoate degradation [PATH:ko00362]                                   | LADA vs Control |
| 904 | 0.0029317 | 0.0820872 | alpha-Linolenic acid metabolism [PATH:ko00592]                        | LADA vs T1D     |
| 330 | 0.0465827 | 0.0828378 | Synthesis and degradation of ketone bodies [PATH:ko00072]             | Control vs T2D  |
| 258 | 0.0468526 | 0.0828378 | Lysine degradation [PATH:ko00310]                                     | Control vs T2D  |
| 363 | 0.0474387 | 0.0828378 | Zeatin biosynthesis [PATH:ko00908]                                    | Control vs T2D  |
| 388 | 0.0474683 | 0.0828378 | Carbon metabolism                                                     | Control vs T2D  |
| 380 | 0.0476945 | 0.0828378 | Styrene degradation [PATH:ko00643]                                    | Control vs T2D  |
| 371 | 0.0482554 | 0.0829389 | Chlorocyclohexane and chlorobenzene degradation [PATH:ko00361]        | Control vs T2D  |
| 527 | 0.0480627 | 0.0831633 | Biotin metabolism [PATH:ko00780]                                      | LADA vs Control |
| 426 | 0.0483705 | 0.0831633 | Two-component system [PATH:ko02020]                                   | LADA vs Control |
| 576 | 0.0493240 | 0.0840653 | Styrene degradation [PATH:ko00643]                                    | LADA vs Control |
| 410 | 0.0508860 | 0.0859799 | Peroxisome [PATH:ko04146]                                             | LADA vs Control |
| 405 | 0.0518124 | 0.0867968 | Biofilm formation - Vibrio cholerae [PATH:ko05111]                    | LADA vs Control |
| 506 | 0.0551464 | 0.0910330 | Mannose type O-glycan biosynthesis [PATH:ko00515]                     | LADA vs Control |
| 481 | 0.0552700 | 0.0910330 | Citrate cycle (TCA cycle) [PATH:ko00020]                              | LADA vs Control |
| 261 | 0.0535643 | 0.0911146 | Tryptophan metabolism [PATH:ko00380]                                  | Control vs T2D  |
| 337 | 0.0561576 | 0.0945510 | Porphyrin and chlorophyll metabolism [PATH:ko00860]                   | Control vs T2D  |
| 248 | 0.0589387 | 0.0981236 | Ribosome [PATH:ko03010]                                               | Control vs T2D  |
| 280 | 0.0594688 | 0.0981236 | Tropane, piperidine and pyridine alkaloid biosynthesis [PATH:ko00960] | Control vs T2D  |

|     | pvalue    | padj      | gene                                     | compare        |
|-----|-----------|-----------|------------------------------------------|----------------|
| 372 | 0.0615338 | 0.0996512 | Dioxin degradation [PATH:ko00621]        | Control vs T2D |
| 279 | 0.0616025 | 0.0996512 | Streptomycin biosynthesis [PATH:ko00521] | Control vs T2D |

```
##Venn diagram comparing LADA to other groups
sig_LADA <- subset(stat_sig, g1=="LADA")
sig_LADA_T1D <- subset(sig_LADA, g2=="T1D") %>% dplyr::select(one_of("gene")) %>%
  pull(gene)
sig_LADA_T2D <- subset(sig_LADA, g2=="T2D") %>% dplyr::select(one_of("gene")) %>%
  pull(gene)
sig_LADA_Control <- subset(sig_LADA, g2=="Control") %>% dplyr::select(one_of("gene")) %>%
  pull(gene)

#Colors
myCol <- c( "#1F78B4", "#33A02C", "#666666")
#
temp <- venn.diagram(list(T1D = sig_LADA_T1D,
                        T2D = sig_LADA_T2D,
                        Control = sig_LADA_Control), filename = NULL,

# Circles
lwd = 2,
lty = 'blank',
fill = myCol,

# Numbers
cex = 3,
fontface = "bold",
fontfamily = "sans",

# Set names
cat.cex = 3,
cat.fontface = "bold",
cat.default.pos = "outer",
cat.pos = c(0, 0, 0),
cat.dist = c(0.085, 0.085, 0.024),
cat.fontfamily = "sans",
rotation = 1)

grid.arrange(gTree(children=temp))
```

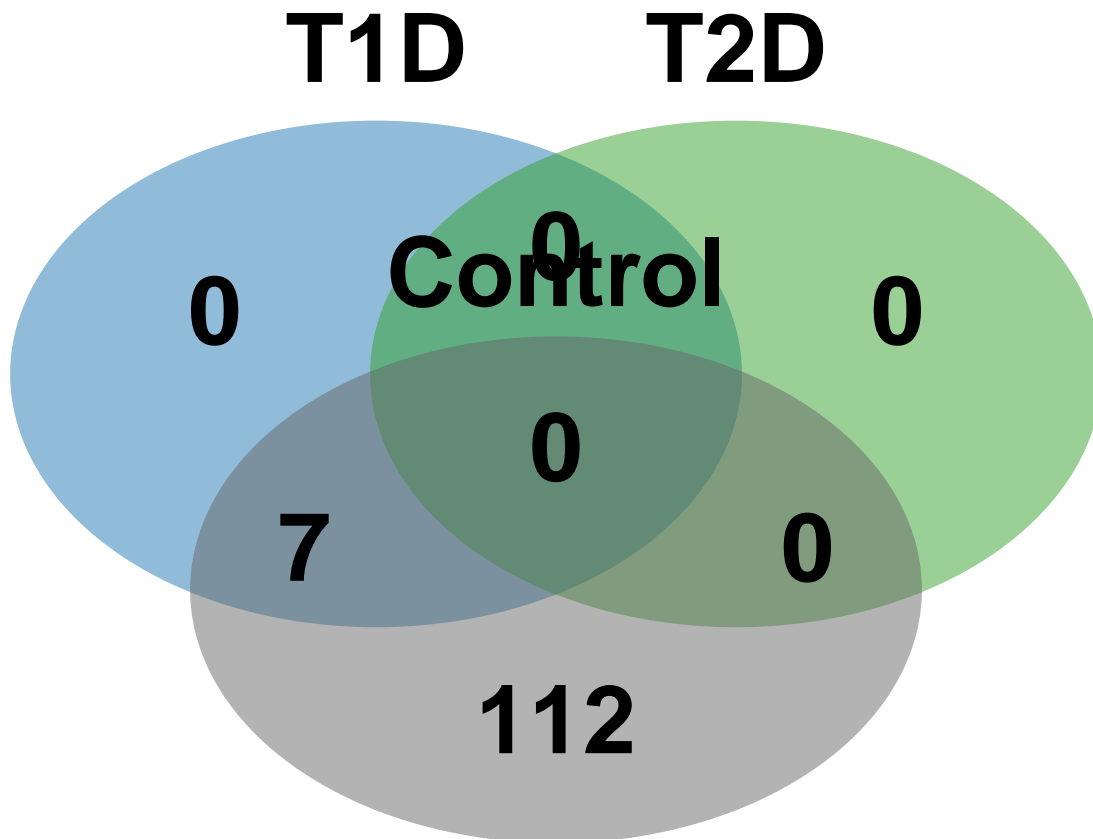

```
Fig2ListRemMet[[ "VennLADA" ]] <-
  gTree(children=temp, top="N differential abundant relative to LADA")
```

```
#Genera LADA that are significantly different from all other groups
intersect(intersect(sig_LADA_T1D,sig_LADA_T2D),sig_LADA_Control)
```

```
character(0)
```

```
##Venn diagram comparing T1D to other groups
sig_T1D <- subset(stat_sig, g1=="T1D" | g2=="T1D")
sig_T1D_LADA <- subset(sig_T1D, g1=="LADA") %>% dplyr::select(one_of("gene")) %>%
  pull(gene)
sig_T1D_T2D <- subset(sig_T1D, g2=="T2D") %>% dplyr::select(one_of("gene")) %>%
  pull(gene)
sig_T1D_Control <- subset(sig_T1D, g1=="Control") %>% dplyr::select(one_of("gene")) %>%
  pull(gene)
#Colors
myCol <- c( "#E31A1C", "#33A02C", "#666666" )
#
temp <- venn.diagram(list(LADA = sig_T1D_LADA,
                        T2D = sig_T1D_T2D,
                        Control = sig_T1D_Control), filename = NULL,

# Circles
lwd = 2,
```

```

lty = 'blank',
fill = myCol,

# Numbers
cex = 2,
fontface = "bold",
fontfamily = "sans",

# Set names
cat.cex = 2,
cat.fontface = "bold",
cat.default.pos = "outer",
cat.pos = c(0, 0, 0),
cat.dist = c(0.055, 0.055, 0.024),
cat.fontfamily = "sans",
rotation = 1)

```

```
grid.arrange(gTree(children=temp))
```

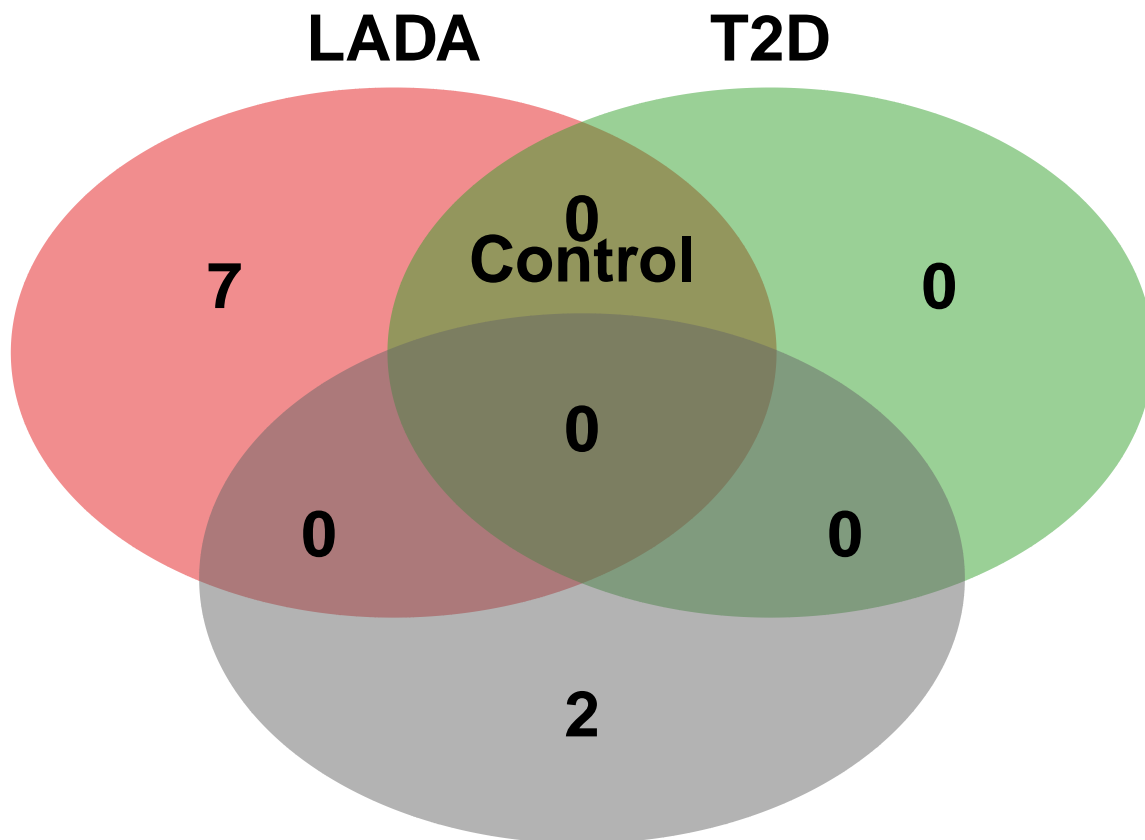

```

Fig2ListRemMet[[ "VennT1D" ]] <-
  gTree(children=temp, top="N differential abundant relative to T1D")

#Genera T1D that are significantly different from all other groups
intersect(intersect(sig_T1D_LADA,sig_T1D_T2D),sig_T1D_Control)

```

character(0)

```
##Venn diagram comparing T2D to other groups
sig_T2D <- subset(stat_sig, g1=="T2D" | g2=="T2D")
sig_T2D_LADA <- subset(sig_T2D, g1=="LADA") %>% dplyr::select(one_of("gene")) %>%
  pull(gene)
sig_T2D_T1D <- subset(sig_T2D, g1=="T1D") %>% dplyr::select(one_of("gene")) %>%
  pull(gene)
sig_T2D_Control <- subset(sig_T2D, g1=="Control") %>% dplyr::select(one_of("gene")) %>%
  pull(gene)
#Colors
myCol <- c( "#E31A1C", "#1F78B4", "#666666")
#
temp <- venn.diagram(list(LADA = sig_T2D_LADA,
                        T1D = sig_T2D_T1D,
                        Control = sig_T2D_Control), filename = NULL,

                    # Circles
                    lwd = 2,
                    lty = 'blank',
                    fill = myCol,

                    # Numbers
                    cex = 2,
                    fontface = "bold",
                    fontfamily = "sans",

                    # Set names
                    cat.cex = 2,
                    cat.fontface = "bold",
                    cat.default.pos = "outer",
                    cat.pos = c(0, 0, 0),
                    cat.dist = c(0.055, 0.055, 0.024),
                    cat.fontfamily = "sans",
                    rotation = 1)

grid.arrange(gTree(children=temp))
```

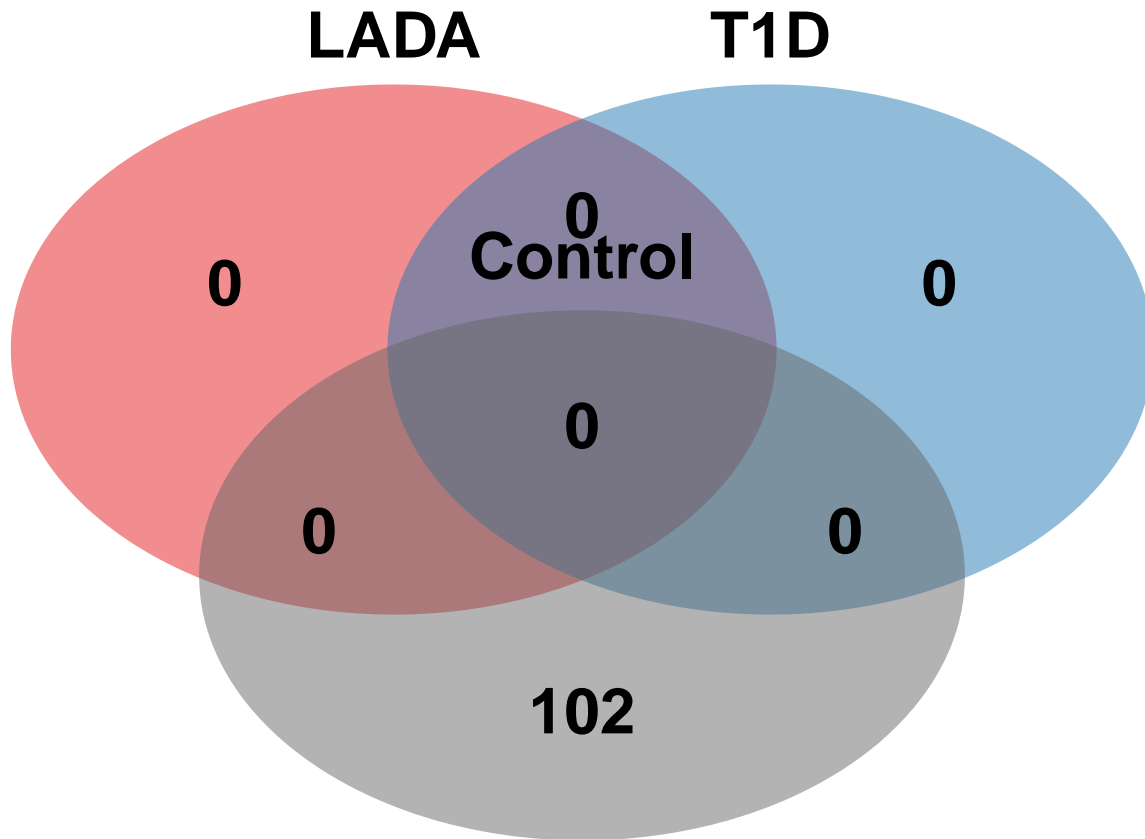

```
Fig2ListRemMet[[ "VennT2D" ]] <-
  gTree(children=temp, top="N differential abundant relative to T2D")
```

```
#Genera T2D that are significantly different from all other groups
intersect(intersect(sig_T2D_LADA,sig_T2D_T1D),sig_T2D_Control)
```

```
character(0)
```

```
##Venn diagram comparing controls to other groups
sig_Control <- subset(stat_sig, g1=="Control" | g2=="Control")
sig_Control_LADA <- subset(sig_Control, g1=="LADA") %>% dplyr::select(one_of("gene")) %>%
  pull(gene)
sig_Control_T1D <- subset(sig_Control, g2=="T1D") %>% dplyr::select(one_of("gene")) %>%
  pull(gene)
sig_Control_T2D <- subset(sig_Control, g2=="T2D") %>% dplyr::select(one_of("gene")) %>%
  pull(gene)
#Colors
myCol <- c( "#E31A1C", "#1F78B4", "#33A02C")
#
temp <- venn.diagram(list(LADA = sig_Control_LADA,
                        T1D = sig_Control_T1D,
                        T2D = sig_Control_T2D), filename = NULL,

# Circles
lwd = 2,
```

```

lty = 'blank',
fill = myCol,

# Numbers
cex = 3,
fontface = "bold",
fontfamily = "sans",

# Set names
cat.cex = 3,
cat.fontface = "bold",
cat.default.pos = "outer",
cat.pos = c(0, 0, 0),
cat.dist = c(0.055, 0.055, 0.024),
cat.fontfamily = "sans",
rotation = 1)

```

```
grid.arrange(gTree(children=temp))
```

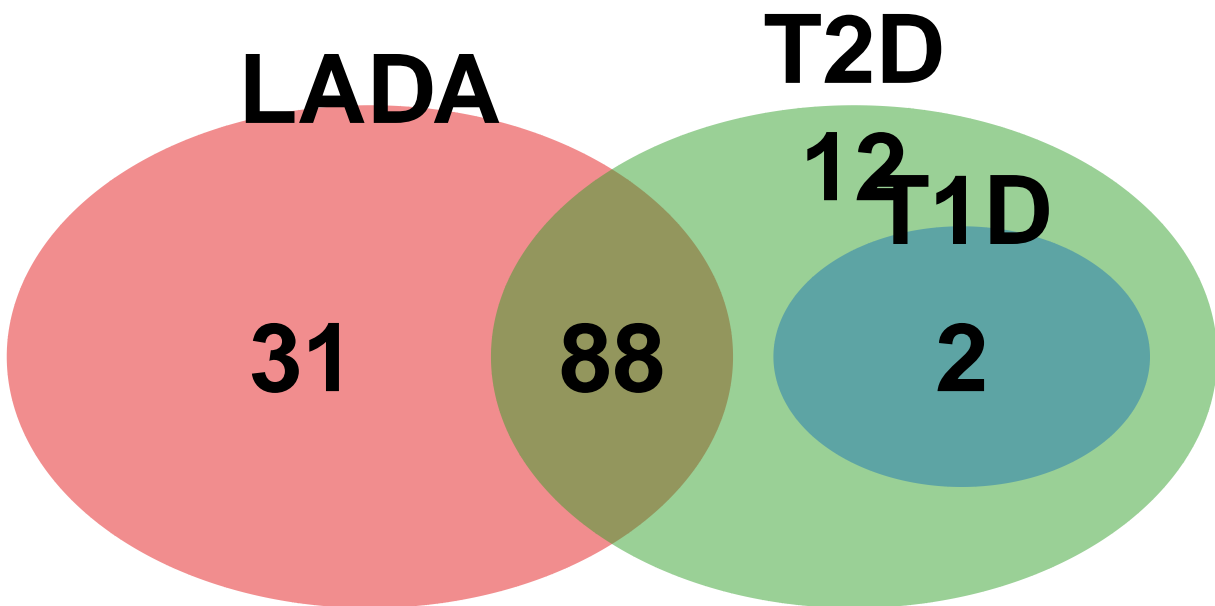

```

Fig2ListRemMet[[ "VennControls" ]] <-
  gTree(children=temp, top="N differential abundant relative to controls")

```

```

#Genera Controls that are significantly different from all other groups
intersect(intersect(sig_T2D_LADA,sig_T2D_T1D),sig_T2D_Control)

```

character(0)

```
##Create boxplots / violin plots
#Normalize to get cells pr. gram feces
if (setequal(colnames(Taxonomy2), SF3$MicrobiomeID)==FALSE) {
  stop("Metadata and Taxonomy out of sync")
}

#Total sum scaling (Use relative abundances)
Taxonomy3<-sweep(Taxonomy2, 2, colSums(Taxonomy), FUN="/")
#Obtain values as cells pr. gram feces
Taxonomy3<-sweep(Taxonomy3, 2, SF3$CellNorm, FUN="*")
#Make to micro gram
Taxonomy3<-Taxonomy3/10^6

##Select organisms
SelOrgs<-unique(stat_sig$gene)

tTaxSelect<-dplyr::select(as.data.frame(t(Taxonomy3)), one_of(c(SelOrgs)))
#Reducing the number because duplicates are removed
tTaxSelect<-add_rownames(tTaxSelect, "MicrobiomeID")
Plotting<-merge(SF3, tTaxSelect, by="MicrobiomeID")

##Might have issues with special characters, so this chunk might be needed
SelOrgs<-str_replace_all(SelOrgs, " ", "_")
SelOrgs<-str_replace_all(SelOrgs, "-", "_")
SelOrgs<-str_replace_all(SelOrgs, "/", "_")
SelOrgs<-gsub("\\[|\\]", "", SelOrgs)
SelOrgs<-str_replace_all(SelOrgs, ":", "_")
SelOrgs<-str_replace_all(SelOrgs, ",", "_")
SelOrgs<-str_replace_all(SelOrgs, "2_", "Two_")
SelOrgs<-str_replace_all(SelOrgs, "\\(", "_")
SelOrgs<-str_replace_all(SelOrgs, "\\)", "_")
colnames(Plotting) <- str_replace_all(colnames(Plotting), " ", "_")
colnames(Plotting) <- str_replace_all(colnames(Plotting), "-", "_")
colnames(Plotting) <- str_replace_all(colnames(Plotting), "/", "_")
colnames(Plotting) <- gsub("\\[|\\]", "", colnames(Plotting))
colnames(Plotting) <- str_replace_all(colnames(Plotting), ":", "_")
colnames(Plotting) <- str_replace_all(colnames(Plotting), ",", "_")
colnames(Plotting) <- str_replace_all(colnames(Plotting), "2_", "Two_")
colnames(Plotting) <- str_replace_all(colnames(Plotting), "\\(", "_")
colnames(Plotting) <- str_replace_all(colnames(Plotting), "\\)", "_")

#Plot logs on y axis
Plotting2 <- bind_cols(Plotting[,1:16], log10(Plotting[,17:ncol(Plotting)]+1))
#See end of chunk for boxplots removed the violinplots, because of redundancy

##Create vulcano plots
#Cut offs Benjamini-Hochberg method to add to vulcano plot
#Don't know how to get exact so it is a cut-off corresponding to the BH method
BHAll<-aggregate(stat_sig[, 5:6], list(stat_sig$compare), max)
row.names(BHAll)<-BHAll$Group.1
```



```

BHLadaCon <- BHA11[which(rownames(BHA11))=="LADA vs Control",
                  which(colnames(BHA11))=="pvalue"]
BHLadaT1D <- BHA11[which(rownames(BHA11))=="LADA vs T1D",
                  which(colnames(BHA11))=="pvalue"]
BHLadaT2D <- BHA11[which(rownames(BHA11))=="LADA vs T2D",
                  which(colnames(BHA11))=="pvalue"]

#Vulcano plot
res_stat$minuslog10<--log(res_stat$pvalue)
#
#range(res_stat$minuslog10)
#range(res_stat$log2FoldChange)

names(res_stat)[names(res_stat) == 'gene'] <- 'Genus'
Feature2<-merge(res_stat, Feature, by="Genus")

#Create column org grouping for colouring
Feature2$Level_1 <- ifelse(Feature2$Level_1=="Environmental Information Processing",
                          "Environmental Information Processing",
                          ifelse(Feature2$Level_1=="Cellular Processes", "Cellular Processes",
                          ifelse(Feature2$Level_1=="Metabolism", "Metabolism",
                          ifelse(Feature2$Level_1=="Genetic Information Processing", "Genetic Information Processing",
                          ifelse(Feature2$Level_1=="Unclassified metabolism", "Unclassified metabolism",
                          "Other")))))
#Order Level_1 for plotting
Feature2$Level_1 <- factor(Feature2$Level_1, levels=c("Cellular Processes", "Genetic Information Processing",
                                                    "Metabolism", "Environmental Information Processing",
                                                    "Unclassified metabolism", "Other"))

##Summary significant orgs
#aggregate(Plotting[, 17:ncol(Plotting)], list(Plotting$Diagnosis), mean)
#aggregate(Plotting[, 17:ncol(Plotting)], list(Plotting$Diagnosis), sd)
zeroes <- function(x){
  sum(x == 0)
}
#aggregate(Plotting[, 17:ncol(Plotting)], list(Plotting$Diagnosis), zeroes)
zerocounts <- aggregate(Plotting[, 17:ncol(Plotting)], list(Plotting$Diagnosis), zeroes)
#bind_cols(zerocounts[,1], zerocounts[,2:ncol(zerocounts)]/c(70,30,70,70)*100)

#Add prevalence to plotting
prevalence<-data.frame((240-apply(Taxonomy, 1, zeroes))/240*100)
colnames(prevalence) <- c("Prevalence")
prevalence<-add_rownames(prevalence, var = "Genus")
Feature2 <- merge(Feature2, prevalence, by="Genus")

#Define boundaries
#Always run first without these lines to get indication of very low and high
#log2FoldChange and pvalue
Featurein <- filter(Feature2, -3<log2FoldChange & log2FoldChange<3 & 10>minuslog10)

```

```

Featureout <- filter(Feature2, -3>log2FoldChange | 3<log2FoldChange | 10<minuslog10)
Featureout$log2FoldChange[Featureout$log2FoldChange > 3] <- 3
Featureout$log2FoldChange[Featureout$log2FoldChange < (-3)] <- -3
Featureout$minuslog10[Featureout$minuslog10 > 10] <- 10

#Add text to volcano plots
p1<-ggplot() +
  geom_point(data=Featurein[which(Featurein$Level_1=="Cellular Processes" &
    Featurein$compare=="LADA vs T1D"), ],
    aes(x=log2FoldChange, y=minuslog10, group=Genus), color="#A6CEE3", shape=16,
    size=Featurein[which(Featurein$Level_1=="Cellular Processes" &
    Featurein$compare=="LADA vs T1D"), ]
    [,ncol(Featurein)]/40+0.5) +
  #did not add jitter to the first on purpose. Sizes are scaled from percent
  #to the range 0.5-3
  geom_point(data=Featureout[which(Featureout$Level_1=="Cellular Processes" &
    Featureout$compare=="LADA vs T1D"), ],
    aes(x=log2FoldChange, y=minuslog10, group=Genus), color="#A6CEE3", shape=18,
    size=Featureout[which(Featureout$Level_1=="Cellular Processes" &
    Featureout$compare=="LADA vs T1D"), ]
    [,ncol(Featureout)]/40+0.5) +
  geom_point(data=Featurein[which(Featurein$Level_1=="Genetic Information Processing" &
    Featurein$compare=="LADA vs T1D"), ],
    aes(x=log2FoldChange, y=minuslog10, group=Genus), color="#FB9A99", shape=16,
    size=Featurein[which(Featurein$Level_1=="Genetic Information Processing" &
    Featurein$compare=="LADA vs T1D"), ]
    [,ncol(Featurein)]/40+0.5) +
  geom_jitter(data=Featureout[which(Featureout$Level_1=="Genetic Information Processing" &
    Featureout$compare=="LADA vs T1D"), ],
    aes(x=log2FoldChange, y=minuslog10, group=Genus), color="#FB9A99", shape=18,
    size=Featureout[which(Featureout$Level_1=="Genetic Information Processing" &
    Featureout$compare=="LADA vs T1D"), ]
    [,ncol(Featureout)]/40+0.5, width = 0.1, height = 0.1) +
  geom_point(data=Featurein[which(Featurein$Level_1=="Metabolism" &
    Featurein$compare=="LADA vs T1D"), ],
    aes(x=log2FoldChange, y=minuslog10, group=Genus), color="#FDBF6F", shape=16,
    size=Featurein[which(Featurein$Level_1=="Metabolism" &
    Featurein$compare=="LADA vs T1D"), ]
    [,ncol(Featurein)]/40+0.5) +
  geom_jitter(data=Featureout[which(Featureout$Level_1=="Metabolism" &
    Featureout$compare=="LADA vs T1D"), ],
    aes(x=log2FoldChange, y=minuslog10, group=Genus), color="#FDBF6F", shape=18,
    size=Featureout[which(Featureout$Level_1=="Metabolism" &
    Featureout$compare=="LADA vs T1D"), ]
    [,ncol(Featureout)]/40+0.5, width = 0.1, height = 0.1) +
  geom_point(data=Featurein[which(Featurein$Level_1=="Environmental Information Processing" &
    Featurein$compare=="LADA vs T1D"), ],
    aes(x=log2FoldChange, y=minuslog10, group=Genus),
    color="#B2DF8A", shape=16, alpha=0.75,
    size=Featurein[which(Featurein$Level_1=="Environmental Information Processing" &
    Featurein$compare=="LADA vs T1D"), ]
    [,ncol(Featurein)]/40+0.5) +

```

```

geom_jitter(data=Featureout[which(Featureout$Level_1=="Environmental Information Processing" &
                                Featureout$compare=="LADA vs T1D"), ],
            aes(x=log2FoldChange, y=minuslog10, group=Genus),
            color="#B2DF8A", shape=18,
            size=Featureout[which(Featureout$Level_1=="Environmental Information Processing" &
                                Featureout$compare=="LADA vs T1D"), ]
            [,ncol(Featureout)]/40+0.5, width = 0.1, height = 0.1) +
geom_point(data=Featurein[which(Featurein$Level_1=="Unclassified metabolism" &
                                Featurein$compare=="LADA vs T1D"), ],
            aes(x=log2FoldChange, y=minuslog10, group=Genus), color="#CAB2D6", shape=16,
            size=Featurein[which(Featurein$Level_1=="Unclassified metabolism" &
                                Featurein$compare=="LADA vs T1D"), ]
            [,ncol(Featurein)]/40+0.5) +
geom_jitter(data=Featureout[which(Featureout$Level_1=="Unclassified metabolism" &
                                Featureout$compare=="LADA vs T1D"), ],
            aes(x=log2FoldChange, y=minuslog10, group=Genus), color="#CAB2D6", shape=18,
            size=Featureout[which(Featureout$Level_1=="Unclassified metabolism" &
                                Featureout$compare=="LADA vs T1D"), ]
            [,ncol(Featureout)]/40+0.5, width = 0.1, height = 0.1) +
geom_point(data=Featurein[which(Featurein$Level_1=="Other" &
                                Featurein$compare=="LADA vs T1D"), ],
            aes(x=log2FoldChange, y=minuslog10, group=Genus), color="#B3B3B3", shape=16,
            size=Featurein[which(Featurein$Level_1=="Other" &
                                Featurein$compare=="LADA vs T1D"), ]
            [,ncol(Featurein)]/40+0.5) +
geom_jitter(data=Featureout[which(Featureout$Level_1=="Other" &
                                Featureout$compare=="LADA vs T1D"), ],
            aes(x=log2FoldChange, y=minuslog10, group=Genus), color="#B3B3B3", shape=18,
            size=Featureout[which(Featureout$Level_1=="Other" &
                                Featureout$compare=="LADA vs T1D"), ]
            [,ncol(Featureout)]/40+0.5, width = 0.1, height = 0.1) +
geom_text(data=Featurein[which(Featurein$padj<padj_threshold &
                                Featurein$compare=="LADA vs T1D"), ],
            aes(x=log2FoldChange, y=minuslog10, group=Genus, label=Genus),
            nudge_y = 0.2, size=2.5) +
geom_text(data=Featureout[which(Featureout$padj<padj_threshold &
                                Featureout$compare=="LADA vs T1D"), ],
            aes(x=log2FoldChange, y=minuslog10, group=Genus, label=Genus),
            nudge_x=0.6, nudge_y = -0.2, size=2.5) +
# geom_text(data=Featureout[which(Featureout$padj<padj_threshold &
#                               Featureout$compare=="LADA vs T1D" &
#                               Featureout$Genus=="Rikenellaceae_RC9_gut_group"), ],
#           aes(x=log2FoldChange, y=minuslog10, group=Genus, label=Genus),
#           nudge_x=1.22, nudge_y = 0) +
geom_hline(yintercept = -log(0.05), linetype="dashed") +
geom_hline(yintercept = -log(BHLadaT1D), linetype="dashed", alpha=0.1) +
geom_vline(xintercept = -1, linetype="dashed") +
geom_vline(xintercept = 1, linetype="dashed") +
theme_bw() +
ggtitle("T1D") +
xlab("Log2 fold change") +
ylab("-log10(P)") +
theme(panel.grid.major = element_blank(),

```

```

panel.grid.minor = element_blank(),
axis.title=element_text(size=22),
legend.position="bottom",
legend.title=element_text(size=20),
legend.text=element_text(size=20),
axis.text.x = element_text(angle = 45, hjust = 1, size=12),
axis.text.y = element_text(angle = 45, hjust = 1, size=12),
plot.title = element_text(size = 22, hjust=0.5)
#ggplotly(p1)
p1

```

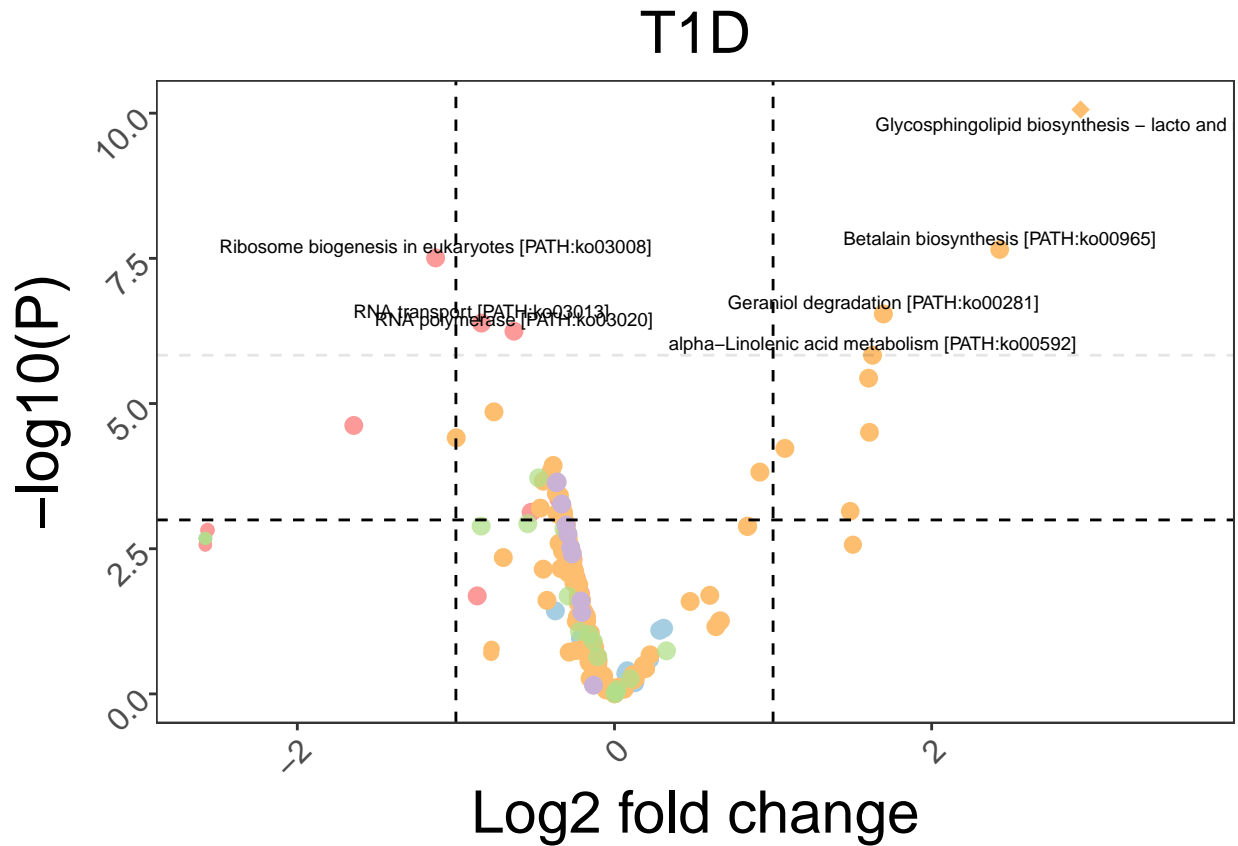

```
Fig2ListRemMet[["vulcLadaT1D"]] <- p1
```

```

p2<-ggplot() +
  geom_point(data=Featurein[which(Featurein$Level_1=="Cellular Processes" &
    Featurein$compare=="LADA vs T2D"), ],
    aes(x=log2FoldChange, y=minuslog10, group=Genus), color="#A6CEE3", shape=16,
    size=Featurein[which(Featurein$Level_1=="Cellular Processes" &
    Featurein$compare=="LADA vs T2D"), ]
    [,ncol(Featurein)]/40+0.5) +
  #did not add jitter to the first on purpose. Sizes are scaled from percent
  #to the range 0.5-3
  geom_point(data=Featureout[which(Featureout$Level_1=="Cellular Processes" &
    Featureout$compare=="LADA vs T2D"), ],

```

```

aes(x=log2FoldChange, y=minuslog10, group=Genus), color="#A6CEE3", shape=18,
size=Featureout[which(Featureout$Level_1=="Cellular Processes" &
  Featureout$compare=="LADA vs T2D"), ]
[,ncol(Featureout)]/40+0.5) +
geom_point(data=Featurein[which(Featurein$Level_1=="Genetic Information Processing" &
  Featurein$compare=="LADA vs T2D"), ],
aes(x=log2FoldChange, y=minuslog10, group=Genus), color="#FB9A99", shape=16,
size=Featurein[which(Featurein$Level_1=="Genetic Information Processing" &
  Featurein$compare=="LADA vs T2D"), ]
[,ncol(Featurein)]/40+0.5) +
geom_jitter(data=Featureout[which(Featureout$Level_1=="Genetic Information Processing" &
  Featureout$compare=="LADA vs T2D"), ],
aes(x=log2FoldChange, y=minuslog10, group=Genus), color="#FB9A99", shape=18,
size=Featureout[which(Featureout$Level_1=="Genetic Information Processing" &
  Featureout$compare=="LADA vs T2D"), ]
[,ncol(Featureout)]/40+0.5,
width = 0.1, height = 0.1) +
geom_point(data=Featurein[which(Featurein$Level_1=="Metabolism" &
  Featurein$compare=="LADA vs T2D"), ],
aes(x=log2FoldChange, y=minuslog10, group=Genus), color="#FDBF6F", shape=16,
size=Featurein[which(Featurein$Level_1=="Metabolism" &
  Featurein$compare=="LADA vs T2D"), ]
[,ncol(Featurein)]/40+0.5) +
geom_jitter(data=Featureout[which(Featureout$Level_1=="Metabolism" &
  Featureout$compare=="LADA vs T2D"), ],
aes(x=log2FoldChange, y=minuslog10, group=Genus), color="#FDBF6F", shape=18,
size=Featureout[which(Featureout$Level_1=="Metabolism" &
  Featureout$compare=="LADA vs T2D"), ]
[,ncol(Featureout)]/40+0.5, width = 0.1, height = 0.1) +
geom_point(data=Featurein[which(Featurein$Level_1=="Environmental Information Processing" &
  Featurein$compare=="LADA vs T2D"), ],
aes(x=log2FoldChange, y=minuslog10, group=Genus),
color="#B2DF8A", shape=16, alpha=0.75,
size=Featurein[which(Featurein$Level_1=="Environmental Information Processing" &
  Featurein$compare=="LADA vs T2D"), ]
[,ncol(Featurein)]/40+0.5) +
geom_jitter(data=Featureout[which(Featureout$Level_1=="Environmental Information Processing" &
  Featureout$compare=="LADA vs T2D"), ],
aes(x=log2FoldChange, y=minuslog10, group=Genus),
color="#B2DF8A", shape=18,
size=Featureout[which(Featureout$Level_1=="Environmental Information Processing" &
  Featureout$compare=="LADA vs T2D"), ]
[,ncol(Featureout)]/40+0.5, width = 0.1, height = 0.1) +
geom_point(data=Featurein[which(Featurein$Level_1=="Unclassified metabolism" &
  Featurein$compare=="LADA vs T2D"), ],
aes(x=log2FoldChange, y=minuslog10, group=Genus), color="#CAB2D6", shape=16,
size=Featurein[which(Featurein$Level_1=="Unclassified metabolism" &
  Featurein$compare=="LADA vs T2D"), ]
[,ncol(Featurein)]/40+0.5) +
geom_jitter(data=Featureout[which(Featureout$Level_1=="Unclassified metabolism" &
  Featureout$compare=="LADA vs T2D"), ],
aes(x=log2FoldChange, y=minuslog10, group=Genus), color="#CAB2D6", shape=18,
size=Featureout[which(Featureout$Level_1=="Unclassified metabolism" &

```

```

        Featureout$compare=="LADA vs T2D"), ]
    [,ncol(Featureout)]/40+0.5, width = 0.1, height = 0.1) +
geom_point(data=Featurein[which(Featurein$Level_1=="Other" &
    Featurein$compare=="LADA vs T2D"), ],
    aes(x=log2FoldChange, y=minuslog10, group=Genus), color="#B3B3B3", shape=16,
    size=Featurein[which(Featurein$Level_1=="Other" &
    Featurein$compare=="LADA vs T2D"), ]
    [,ncol(Featurein)]/40+0.5) +
geom_jitter(data=Featureout[which(Featureout$Level_1=="Other" &
    Featureout$compare=="LADA vs T2D"), ],
    aes(x=log2FoldChange, y=minuslog10, group=Genus), color="#B3B3B3", shape=18,
    size=Featureout[which(Featureout$Level_1=="Other" &
    Featureout$compare=="LADA vs T2D"), ]
    [,ncol(Featureout)]/40+0.5, width = 0.1, height = 0.1) +
geom_text(data=Featurein[which(Featurein$padj<padj_threshold &
    Featurein$compare=="LADA vs T2D"), ],
    aes(x=log2FoldChange, y=minuslog10, group=Genus, label=Genus),
    nudge_y = 0.2, size=2.5) +
geom_text(data=Featureout[which(Featureout$padj<padj_threshold &
    Featureout$compare=="LADA vs T2D"), ],
    aes(x=log2FoldChange, y=minuslog10, group=Genus, label=Genus),
    nudge_x=0.6, nudge_y = -0.2, size=2.5) +
# geom_text(data=Featureout[which(Featureout$padj<padj_threshold &
#     Featureout$compare=="LADA vs T1D" &
#     Featureout$Genus=="Rikenellaceae_RC9_gut_group"), ],
#     aes(x=log2FoldChange, y=minuslog10, group=Genus, label=Genus),
#     nudge_x=1.22, nudge_y = 0) +
geom_hline(yintercept = -log(0.05), linetype="dashed") +
geom_hline(yintercept = -log(BHLadaT2D), linetype="dashed", alpha=0.1) +
geom_vline(xintercept = -1, linetype="dashed") +
geom_vline(xintercept = 1, linetype="dashed") +
theme_bw() +
ggtitle("T2D") +
xlab("Log2 fold change") +
ylab("-log10(P)") +
theme(panel.grid.major = element_blank(),
    panel.grid.minor = element_blank(),
    axis.title=element_text(size=22),
    legend.position="bottom",
    legend.title=element_text(size=20),
    legend.text=element_text(size=20),
    axis.text.x = element_text(angle = 45, hjust = 1, size=12),
    axis.text.y = element_text(angle = 45, hjust = 1, size=12),
    plot.title = element_text(size = 22, hjust=0.5))
#ggplotly(p2)
p2

```

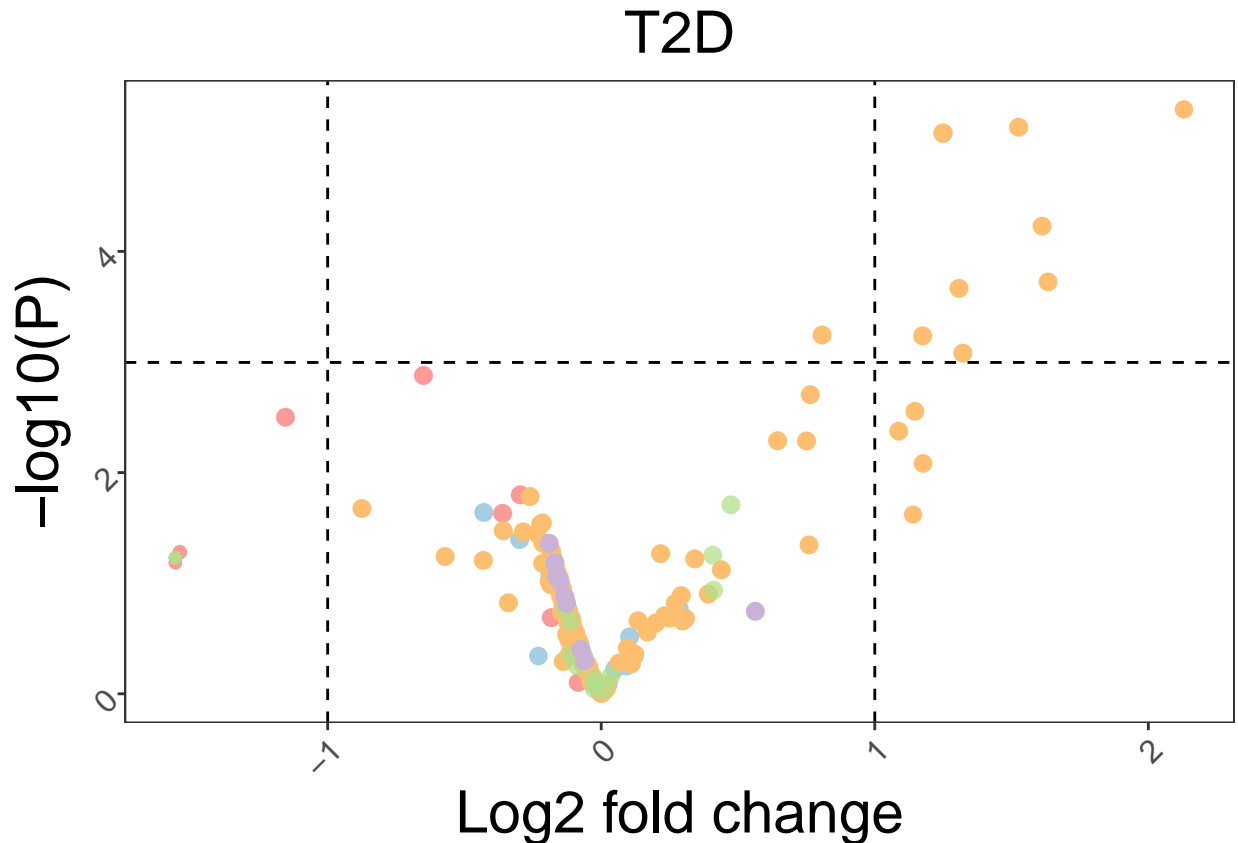

```
Fig2ListRemMet[["vulcLadaT2D"]] <- p2
```

```
p3<-ggplot() +
  geom_point(data=Featurein[which(Featurein$Level_1=="Cellular Processes" &
    Featurein$compare=="LADA vs Control"), ],
    aes(x=log2FoldChange, y=minuslog10, group=Genus), color="#A6CEE3", shape=16,
    size=Featurein[which(Featurein$Level_1=="Cellular Processes" &
    Featurein$compare=="LADA vs Control"), ]
    [,ncol(Featurein)]/40+0.5) +
  #did not add jitter to the first on purpose. Sizes are scaled from percent to the range 0.5-3
  geom_point(data=Featureout[which(Featureout$Level_1=="Cellular Processes" &
    Featureout$compare=="LADA vs Control"), ],
    aes(x=log2FoldChange, y=minuslog10, group=Genus), color="#A6CEE3", shape=18,
    size=Featureout[which(Featureout$Level_1=="Cellular Processes" &
    Featureout$compare=="LADA vs Control"), ]
    [,ncol(Featureout)]/40+0.5) +
  geom_point(data=Featurein[which(Featurein$Level_1=="Genetic Information Processing" &
    Featurein$compare=="LADA vs Control"), ],
    aes(x=log2FoldChange, y=minuslog10, group=Genus), color="#FB9A99", shape=16,
    size=Featurein[which(Featurein$Level_1=="Genetic Information Processing" &
    Featurein$compare=="LADA vs Control"), ]
    [,ncol(Featurein)]/40+0.5) +
  geom_jitter(data=Featureout[which(Featureout$Level_1=="Genetic Information Processing" &
    Featureout$compare=="LADA vs Control"), ],
    aes(x=log2FoldChange, y=minuslog10, group=Genus), color="#FB9A99", shape=18,
```



```

    size=Featureout[which(Featureout$Level_1=="Genetic Information Processing" &
      Featureout$compare=="LADA vs Control"), ]
    [,ncol(Featureout)]/40+0.5, width = 0.1, height = 0.1) +
geom_point(data=Featurein[which(Featurein$Level_1=="Metabolism" &
  Featurein$compare=="LADA vs Control"), ],
  aes(x=log2FoldChange, y=minuslog10, group=Genus), color="#FDBF6F", shape=16,
  size=Featurein[which(Featurein$Level_1=="Metabolism" &
    Featurein$compare=="LADA vs Control"), ]
    [,ncol(Featurein)]/40+0.5) +
geom_jitter(data=Featureout[which(Featureout$Level_1=="Metabolism" &
  Featureout$compare=="LADA vs Control"), ],
  aes(x=log2FoldChange, y=minuslog10, group=Genus), color="#FDBF6F", shape=18,
  size=Featureout[which(Featureout$Level_1=="Metabolism" &
    Featureout$compare=="LADA vs Control"), ]
    [,ncol(Featureout)]/40+0.5, width = 0.1, height = 0.1) +
geom_point(data=Featurein[which(Featurein$Level_1=="Environmental Information Processing" &
  Featurein$compare=="LADA vs Control"), ],
  aes(x=log2FoldChange, y=minuslog10, group=Genus),
  color="#B2DF8A", shape=16, alpha=0.75,
  size=Featurein[which(Featurein$Level_1=="Environmental Information Processing" &
    Featurein$compare=="LADA vs Control"), ]
    [,ncol(Featurein)]/40+0.5) +
geom_jitter(data=Featureout[which(Featureout$Level_1=="Environmental Information Processing" &
  Featureout$compare=="LADA vs Control"), ],
  aes(x=log2FoldChange, y=minuslog10, group=Genus),
  color="#B2DF8A", shape=18,
  size=Featureout[which(Featureout$Level_1=="Environmental Information Processing" &
    Featureout$compare=="LADA vs Control"), ]
    [,ncol(Featureout)]/40+0.5, width = 0.1, height = 0.1) +
geom_point(data=Featurein[which(Featurein$Level_1=="Unclassified metabolism" &
  Featurein$compare=="LADA vs Control"), ],
  aes(x=log2FoldChange, y=minuslog10, group=Genus), color="#CAB2D6", shape=16,
  size=Featurein[which(Featurein$Level_1=="Unclassified metabolism" &
    Featurein$compare=="LADA vs Control"), ]
    [,ncol(Featurein)]/40+0.5) +
geom_jitter(data=Featureout[which(Featureout$Level_1=="Unclassified metabolism" &
  Featureout$compare=="LADA vs Control"), ],
  aes(x=log2FoldChange, y=minuslog10, group=Genus), color="#CAB2D6", shape=18,
  size=Featureout[which(Featureout$Level_1=="Unclassified metabolism" &
    Featureout$compare=="LADA vs Control"), ]
    [,ncol(Featureout)]/40+0.5, width = 0.1, height = 0.1) +
geom_point(data=Featurein[which(Featurein$Level_1=="Other" &
  Featurein$compare=="LADA vs Control"), ],
  aes(x=log2FoldChange, y=minuslog10, group=Genus), color="#B3B3B3", shape=16,
  size=Featurein[which(Featurein$Level_1=="Other" &
    Featurein$compare=="LADA vs Control"), ]
    [,ncol(Featurein)]/40+0.5) +
geom_jitter(data=Featureout[which(Featureout$Level_1=="Other" &
  Featureout$compare=="LADA vs Control"), ],
  aes(x=log2FoldChange, y=minuslog10, group=Genus), color="#B3B3B3", shape=18,
  size=Featureout[which(Featureout$Level_1=="Other" &
    Featureout$compare=="LADA vs Control"), ]
    [,ncol(Featureout)]/40+0.5, width = 0.1, height = 0.1) +

```



```

geom_text(data=Featurein[which(Featurein$padj<padj_threshold &
                             Featurein$compare=="LADA vs Control"), ],
          aes(x=log2FoldChange, y=minuslog10, group=Genus, label=Genus),
          nudge_y = 0.2, size=2.5) +
geom_text(data=Featureout[which(Featureout$padj<padj_threshold &
                                Featureout$compare=="LADA vs Control"), ],
          aes(x=log2FoldChange, y=minuslog10, group=Genus, label=Genus),
          nudge_x=0.6, nudge_y = -0.2, size=2.5) +
# geom_text(data=Featureout[which(Featureout$padj<padj_threshold &
#                                Featureout$compare=="LADA vs T1D" &
#                                Featureout$Genus=="Rikenellaceae_RC9_gut_group"), ],
#          aes(x=log2FoldChange, y=minuslog10, group=Genus, label=Genus),
#          nudge_x=1.22, nudge_y = 0) +
geom_hline(yintercept = -log(0.05), linetype="dashed") +
geom_hline(yintercept = -log(BHLadaCon), linetype="dashed", alpha=0.1) +
geom_vline(xintercept = -1, linetype="dashed") +
geom_vline(xintercept = 1, linetype="dashed") +
theme_bw() +
ggtitle("Controls") +
xlab("Log2 fold change") +
ylab("-log10(P)") +
theme(panel.grid.major = element_blank(),
      panel.grid.minor = element_blank(),
      axis.title=element_text(size=22),
      legend.position="bottom",
      legend.title=element_text(size=20),
      legend.text=element_text(size=20),
      axis.text.x = element_text(angle = 45, hjust = 1, size=12),
      axis.text.y = element_text(angle = 45, hjust = 1, size=12),
      plot.title = element_text(size = 22, hjust=0.5))
#ggplotly(p3)
p3

```



```

for (i in SelOrgs) {
Boxplot <-
ggplot(Plotting2, aes_string(x="Diagnosis", y=i, group="Diagnosis")) +
  geom_boxplot() +
  #   geom_boxplot(aes(fill=Diagnosis, trim=FALSE)) +
  #   geom_jitter() +
  geom_jitter(aes(color=Diagnosis), size=2) +
  stat_summary(fun.data="mean_sdl",
               mult=1, #mean plus minus a constant (mult=1) times the st.dev
               geom="pointrange",
               width=0.2 ) +
  #stat_summary(fun.y = mean, geom = "point") +
  #facet_grid(. ~ Metformin, scales="fixed") + #Scales can also be "free"
  ggtitle(i) +
  #xlab("Diagnosis") +
  ylab("Cells pr. g feces") +
  scale_fill_manual(values=c(Control = "#666666", T1D = "#1F78B4",
                             T2D = "#33A02C", LADA = "#E31A1C")) +
  scale_color_manual(values=c(Control = "#666666", T1D = "#1F78B4",
                              T2D = "#33A02C", LADA = "#E31A1C")) +
  theme_bw() +
  theme(legend.position="none",
        title =element_text(size=18, face='bold'),
        panel.grid.major = element_blank(),
        panel.grid.minor = element_blank(),
        axis.title=element_text(size=16),
        axis.title.x = element_blank(),
        axis.text.x = element_text(angle = 45, hjust = 1, size=14),
        axis.text.y = element_text(angle = 45, hjust = 1, size=12))
Fig2ListRemMet[[i]] <- Boxplot
#print(kable(stat_sig[which(stat_sig$gene==i), c(5,6,7,10)]))
cat("\n")
tabling<-res_stat[which(res_stat$Genus==i), c(5,6,7,10)]
print(kable(tabling))
#print(tabling)
cat("\n")
print(Boxplot)
}

```

|      | pvalue    | padj      | Genus                          | compare                                            |
|------|-----------|-----------|--------------------------------|----------------------------------------------------|
| 895  | 0.0000354 | 0.0069458 | Glycosphingolipid_biosynthesis | lacto_and_neolacto_series_LADA_vs_00601<br>T1D     |
| 503  | 0.0082172 | 0.0346055 | Glycosphingolipid_biosynthesis | lacto_and_neolacto_series_LADA_vs_00601<br>Control |
| 111  | 0.0072064 | 0.2017796 | Glycosphingolipid_biosynthesis | lacto_and_neolacto_series_CBAFB1_vs_00601<br>T1D   |
| 1091 | 0.0050767 | 0.3088442 | Glycosphingolipid_biosynthesis | lacto_and_neolacto_series_LADA_vs_00601<br>T2D     |
| 699  | 0.1346867 | 0.6495082 | Glycosphingolipid_biosynthesis | lacto_and_neolacto_series_T1D_vs_T2D_00601         |
| 307  | 0.4738221 | NA        | Glycosphingolipid_biosynthesis | lacto_and_neolacto_series_CBAFB1_vs_00601<br>T2D   |

# Glycosphingolipid\_biosynthesis\_\_\_lactc

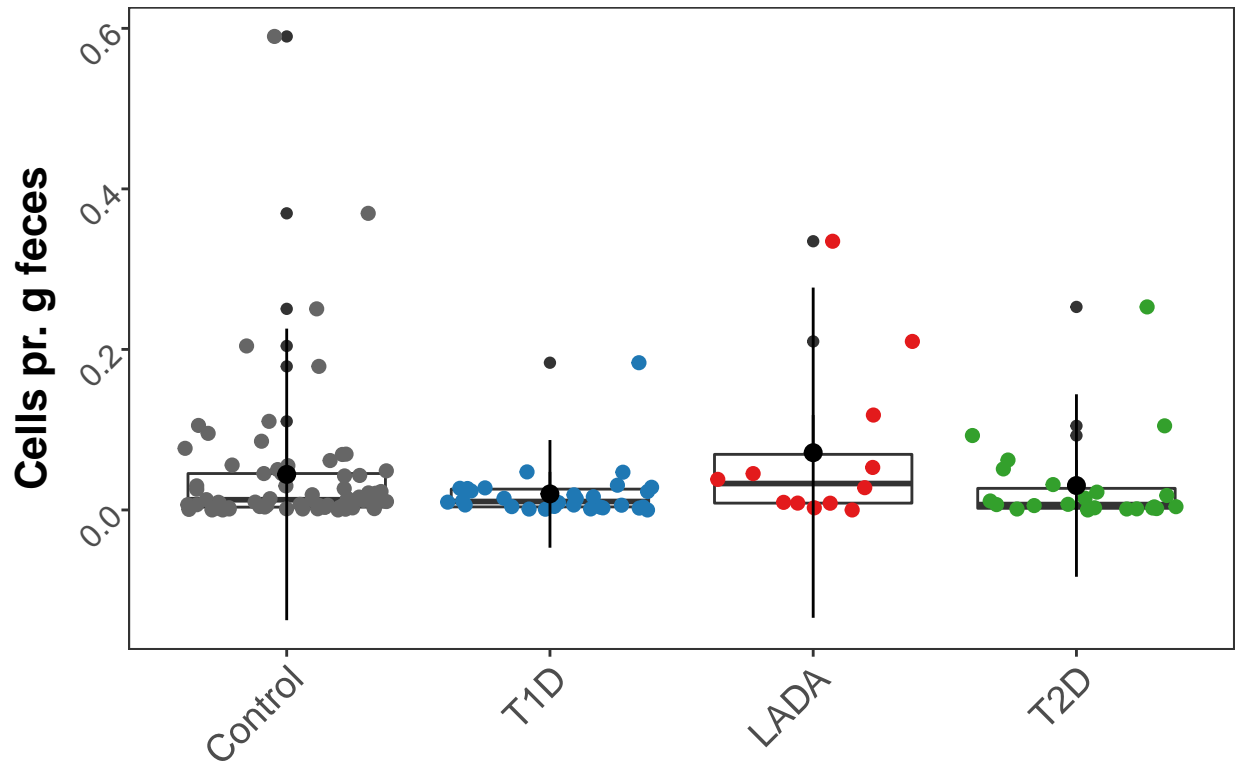

|      | pvalue    | padj      | Genus                             | compare         |
|------|-----------|-----------|-----------------------------------|-----------------|
| 552  | 0.0001449 | 0.0162870 | Geraniol_degradation_PATH_ko00281 | LADA vs Control |
| 944  | 0.0014410 | 0.0632892 | Geraniol_degradation_PATH_ko00281 | LADA vs T1D     |
| 1140 | 0.0059609 | 0.3088442 | Geraniol_degradation_PATH_ko00281 | LADA vs T2D     |
| 160  | 0.6509860 | 0.7594837 | Geraniol_degradation_PATH_ko00281 | Control vs T1D  |
| 748  | 0.6939565 | 0.7862166 | Geraniol_degradation_PATH_ko00281 | T1D vs T2D      |
| 356  | 0.3872905 | NA        | Geraniol_degradation_PATH_ko00281 | Control vs T2D  |

# Geraniol\_degradation\_PATH\_ko00281

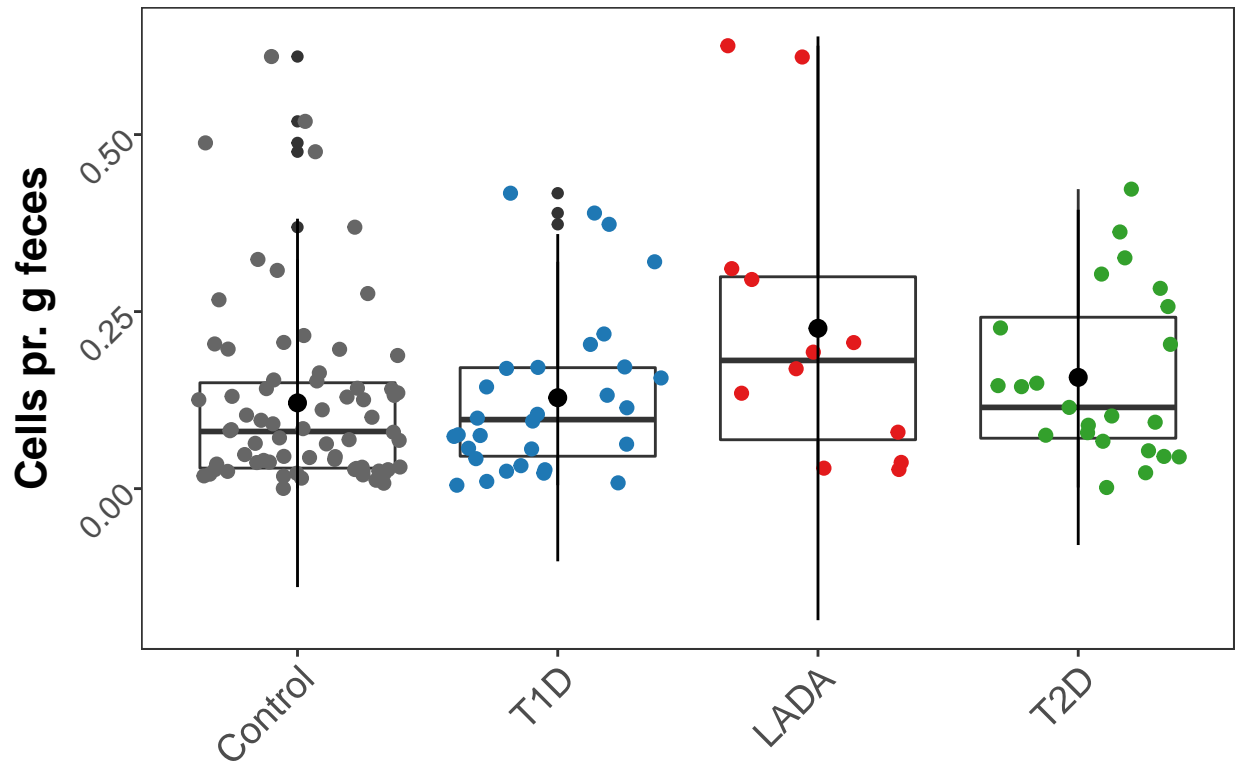

|      | pvalue    | padj      | Genus                                        | compare         |
|------|-----------|-----------|----------------------------------------------|-----------------|
| 512  | 0.0001662 | 0.0162870 | alpha_Linolenic_acid_metabolism_PATH_ko00592 | LADA vs Control |
| 904  | 0.0029317 | 0.0820872 | alpha_Linolenic_acid_metabolism_PATH_ko00592 | LADA vs T1D     |
| 120  | 0.4626422 | 0.6399468 | alpha_Linolenic_acid_metabolism_PATH_ko00592 | Control vs T1D  |
| 708  | 0.3086442 | 0.6495082 | alpha_Linolenic_acid_metabolism_PATH_ko00592 | T1D vs T2D      |
| 1100 | 0.0393109 | 0.8415375 | alpha_Linolenic_acid_metabolism_PATH_ko00592 | LADA vs T2D     |
| 316  | 0.0656192 | NA        | alpha_Linolenic_acid_metabolism_PATH_ko00592 | Control vs T2D  |

# alpha\_Linolenic\_acid\_metabolism\_PATH

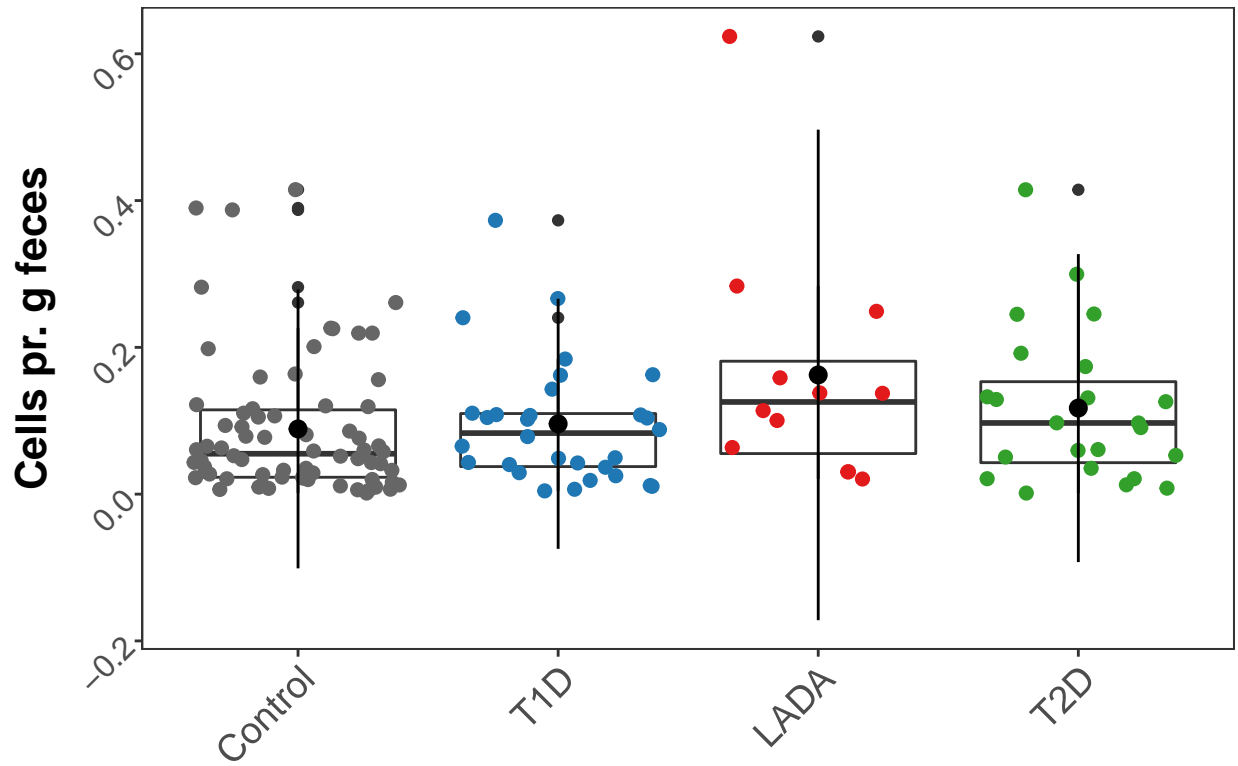

|      | pvalue    | padj      | Genus                                 | compare         |
|------|-----------|-----------|---------------------------------------|-----------------|
| 571  | 0.0007520 | 0.0333090 | Ethylbenzene_degradation_PATH_ko00642 | LADA vs Control |
| 963  | 0.0110563 | 0.1970026 | Ethylbenzene_degradation_PATH_ko00642 | LADA vs T1D     |
| 1159 | 0.0145780 | 0.5714587 | Ethylbenzene_degradation_PATH_ko00642 | LADA vs T2D     |
| 179  | 0.3968882 | 0.5762229 | Ethylbenzene_degradation_PATH_ko00642 | Control vs T1D  |
| 767  | 0.9943129 | 0.9943129 | Ethylbenzene_degradation_PATH_ko00642 | T1D vs T2D      |
| 375  | 0.4466309 | NA        | Ethylbenzene_degradation_PATH_ko00642 | Control vs T2D  |

# Ethylbenzene\_degradation\_PATH\_ko00

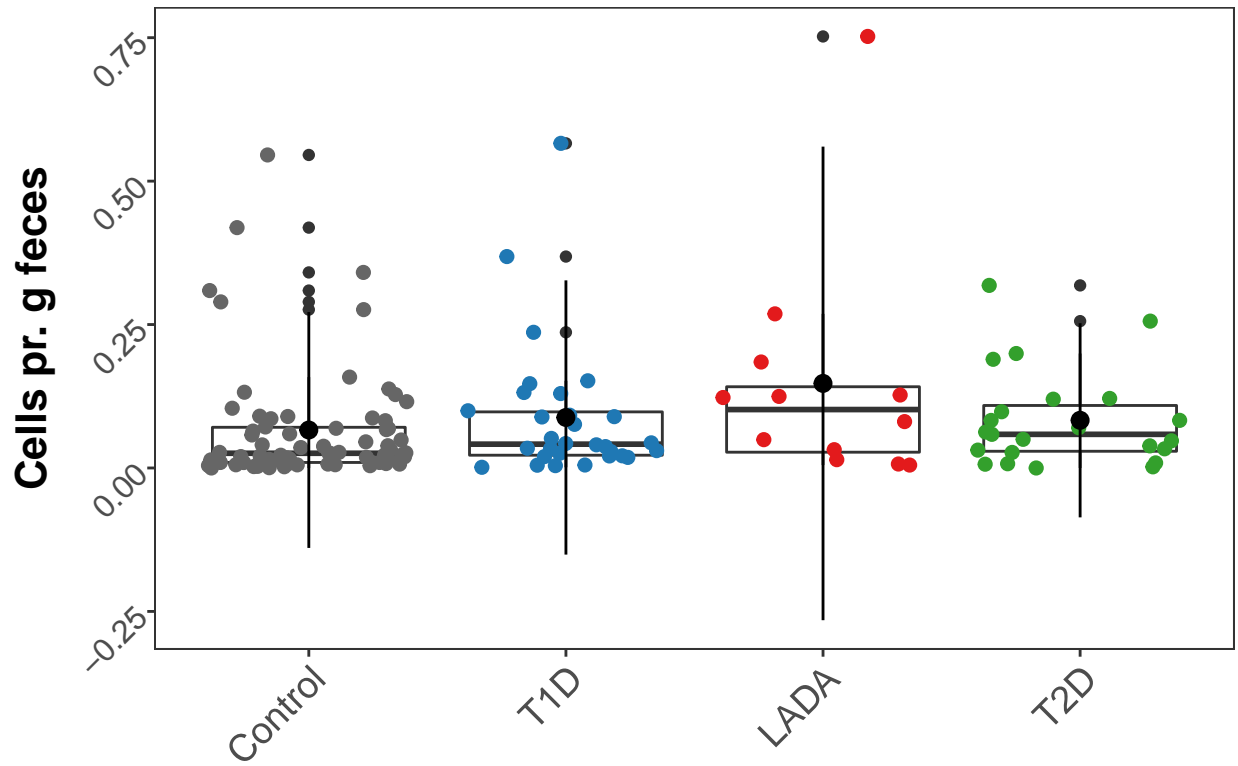

|      | pvalue    | padj      | Genus                                   | compare         |
|------|-----------|-----------|-----------------------------------------|-----------------|
| 466  | 0.0010929 | 0.0333090 | Glucosinolate_biosynthesis_PATH_ko00966 | LADA vs Control |
| 270  | 0.0163201 | 0.0629443 | Glucosinolate_biosynthesis_PATH_ko00966 | Control vs T2D  |
| 858  | 0.0195618 | 0.2312928 | Glucosinolate_biosynthesis_PATH_ko00966 | LADA vs T1D     |
| 74   | 0.3071963 | 0.5208704 | Glucosinolate_biosynthesis_PATH_ko00966 | Control vs T1D  |
| 662  | 0.2009961 | 0.6495082 | Glucosinolate_biosynthesis_PATH_ko00966 | T1D vs T2D      |
| 1054 | 0.2134509 | 0.8415375 | Glucosinolate_biosynthesis_PATH_ko00966 | LADA vs T2D     |

# Glucosinolate\_biosynthesis\_PATH\_ko00

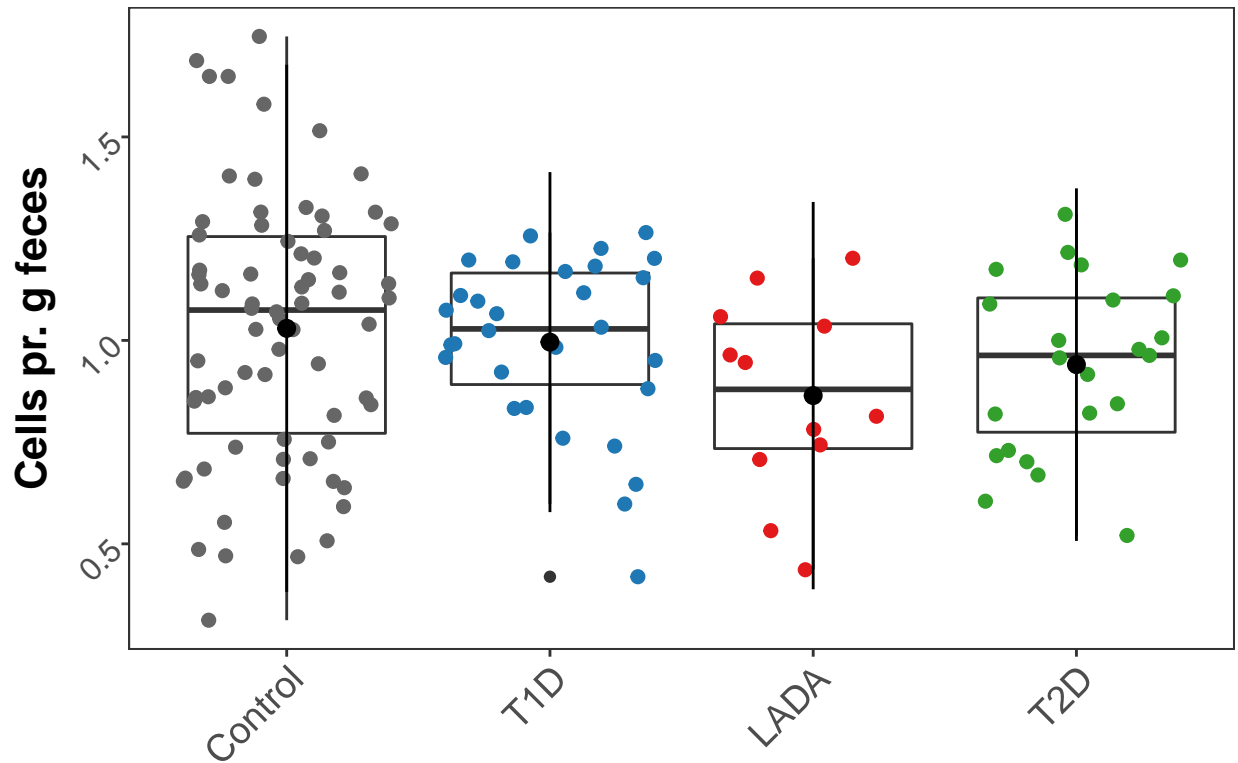

|      | pvalue    | padj      | Genus                                                    | compare            |
|------|-----------|-----------|----------------------------------------------------------|--------------------|
| 459  | 0.0014467 | 0.0333090 | Valine__leucine_and_isoleucine_biosynthesis_PATH_ko00290 | Control vs Control |
| 263  | 0.0115943 | 0.0629443 | Valine__leucine_and_isoleucine_biosynthesis_PATH_ko00290 | Control vs T2D     |
| 851  | 0.0433602 | 0.2312928 | Valine__leucine_and_isoleucine_biosynthesis_PATH_ko00290 | Control vs T1D     |
| 67   | 0.1620155 | 0.4612224 | Valine__leucine_and_isoleucine_biosynthesis_PATH_ko00290 | Control vs T1D     |
| 655  | 0.2765856 | 0.6495082 | Valine__leucine_and_isoleucine_biosynthesis_PATH_ko00290 | Control vs T2D     |
| 1047 | 0.2752953 | 0.8415375 | Valine__leucine_and_isoleucine_biosynthesis_PATH_ko00290 | Control vs T2D     |



# Valine\_leucine\_and\_isoleucine\_biosynt

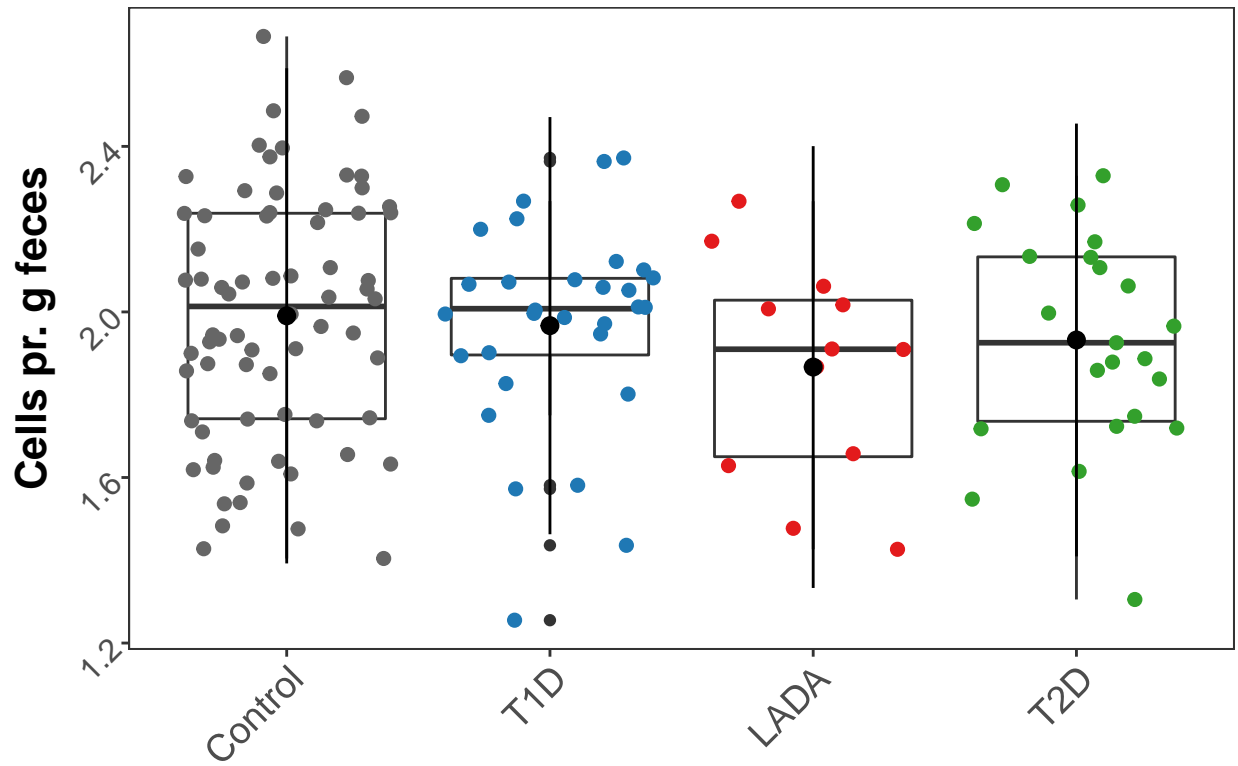

|      | pvalue    | padj      | Genus                             | compare         |
|------|-----------|-----------|-----------------------------------|-----------------|
| 579  | 0.0015375 | 0.0333090 | Two_Oxocarboxylic_acid_metabolism | LADA vs Control |
| 383  | 0.0148318 | 0.0629443 | Two_Oxocarboxylic_acid_metabolism | Control vs T2D  |
| 971  | 0.0380121 | 0.2312928 | Two_Oxocarboxylic_acid_metabolism | LADA vs T1D     |
| 187  | 0.1978450 | 0.4786856 | Two_Oxocarboxylic_acid_metabolism | Control vs T1D  |
| 775  | 0.2717792 | 0.6495082 | Two_Oxocarboxylic_acid_metabolism | T1D vs T2D      |
| 1167 | 0.2565010 | 0.8415375 | Two_Oxocarboxylic_acid_metabolism | LADA vs T2D     |

## Two\_Oxocarboxylic\_acid\_metabolism

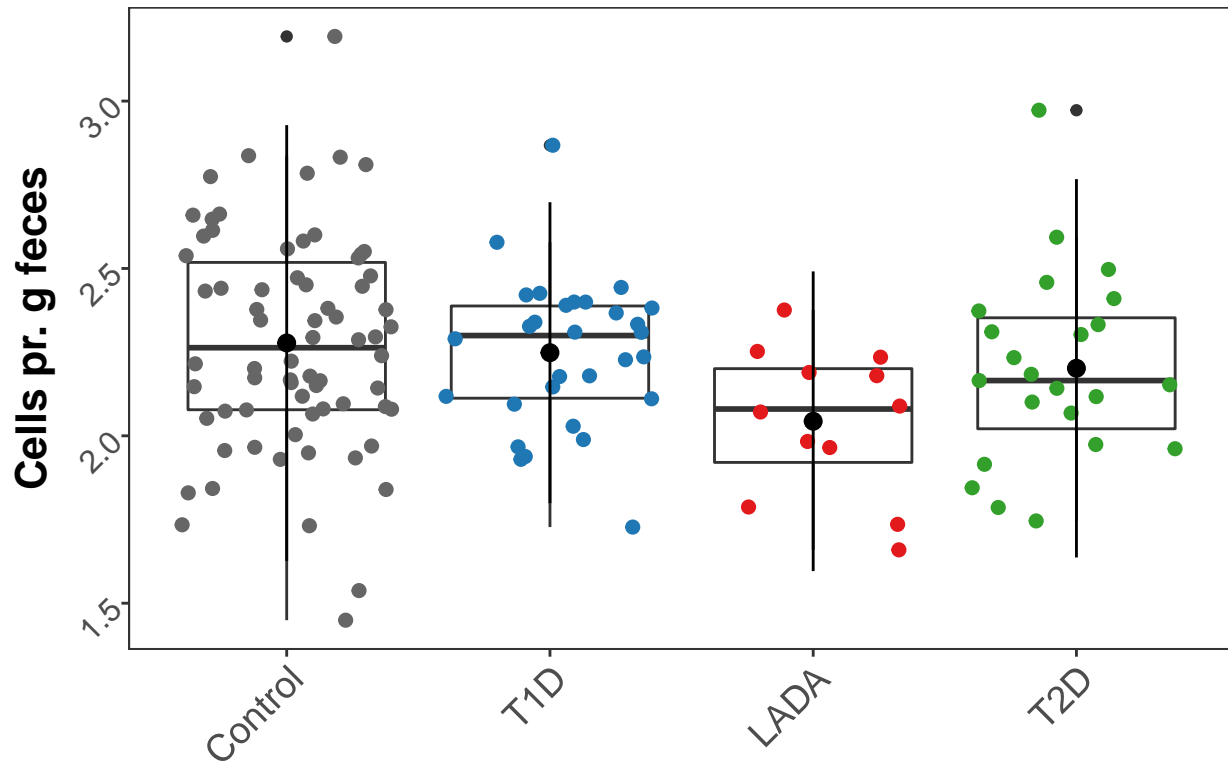

|      | pvalue    | padj      | Genus                               | compare         |
|------|-----------|-----------|-------------------------------------|-----------------|
| 472  | 0.0015836 | 0.0333090 | Phenazine_biosynthesis_PATH_ko00405 | LADA vs Control |
| 276  | 0.0104857 | 0.0629443 | Phenazine_biosynthesis_PATH_ko00405 | Control vs T2D  |
| 864  | 0.0316984 | 0.2312928 | Phenazine_biosynthesis_PATH_ko00405 | LADA vs T1D     |
| 80   | 0.2458719 | 0.4839499 | Phenazine_biosynthesis_PATH_ko00405 | Control vs T1D  |
| 668  | 0.1916229 | 0.6495082 | Phenazine_biosynthesis_PATH_ko00405 | T1D vs T2D      |
| 1060 | 0.2963872 | 0.8415375 | Phenazine_biosynthesis_PATH_ko00405 | LADA vs T2D     |

# Phenazine\_biosynthesis\_PATH\_ko00405

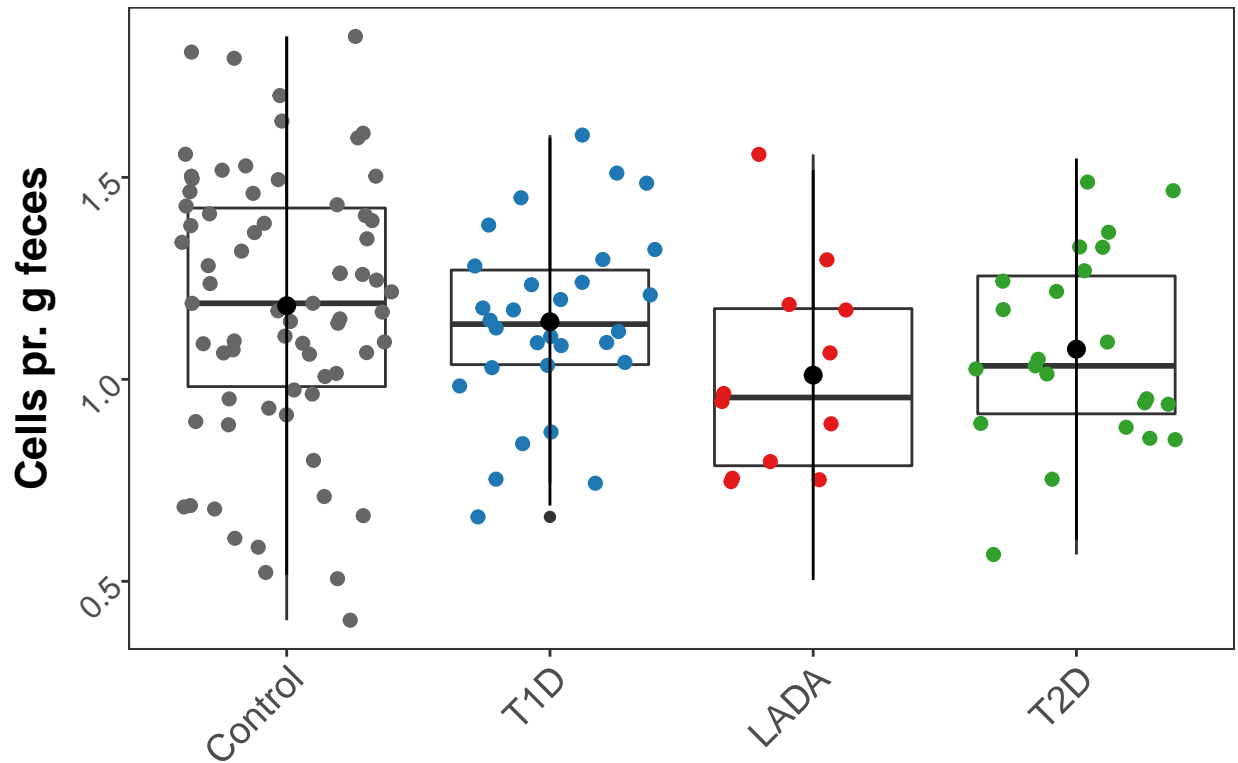

|      | pvalue    | padj      | Genus                               | compare         |
|------|-----------|-----------|-------------------------------------|-----------------|
| 515  | 0.0016076 | 0.0333090 | Ether_lipid_metabolism_PATH_ko00565 | LADA vs Control |
| 907  | 0.0043533 | 0.1066569 | Ether_lipid_metabolism_PATH_ko00565 | LADA vs T1D     |
| 711  | 0.5186839 | 0.6862683 | Ether_lipid_metabolism_PATH_ko00565 | T1D vs T2D      |
| 1103 | 0.0255849 | 0.7163761 | Ether_lipid_metabolism_PATH_ko00565 | LADA vs T2D     |
| 123  | 0.9582080 | 0.9731024 | Ether_lipid_metabolism_PATH_ko00565 | Control vs T1D  |
| 319  | 0.4284327 | NA        | Ether_lipid_metabolism_PATH_ko00565 | Control vs T2D  |

# Ether\_lipid\_metabolism\_PATH\_ko00565

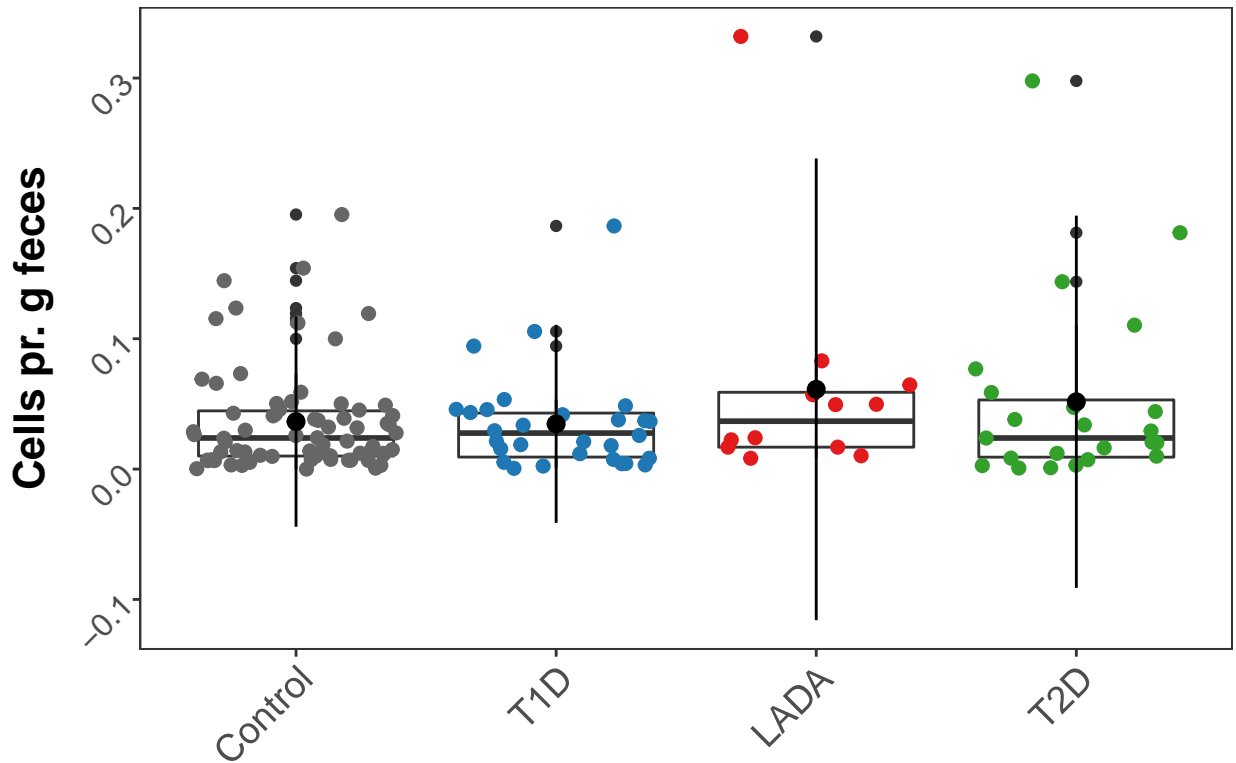

|      | pvalue    | padj      | Genus                            | compare         |
|------|-----------|-----------|----------------------------------|-----------------|
| 536  | 0.0016305 | 0.0333090 | Thiamine_metabolism_PATH_ko00730 | LADA vs Control |
| 340  | 0.0096686 | 0.0629443 | Thiamine_metabolism_PATH_ko00730 | Control vs T2D  |
| 928  | 0.0642766 | 0.2312928 | Thiamine_metabolism_PATH_ko00730 | LADA vs T1D     |
| 144  | 0.1064037 | 0.4612224 | Thiamine_metabolism_PATH_ko00730 | Control vs T1D  |
| 732  | 0.3307697 | 0.6495082 | Thiamine_metabolism_PATH_ko00730 | T1D vs T2D      |
| 1124 | 0.3087824 | 0.8415375 | Thiamine_metabolism_PATH_ko00730 | LADA vs T2D     |

# Thiamine\_metabolism\_PATH\_ko00730

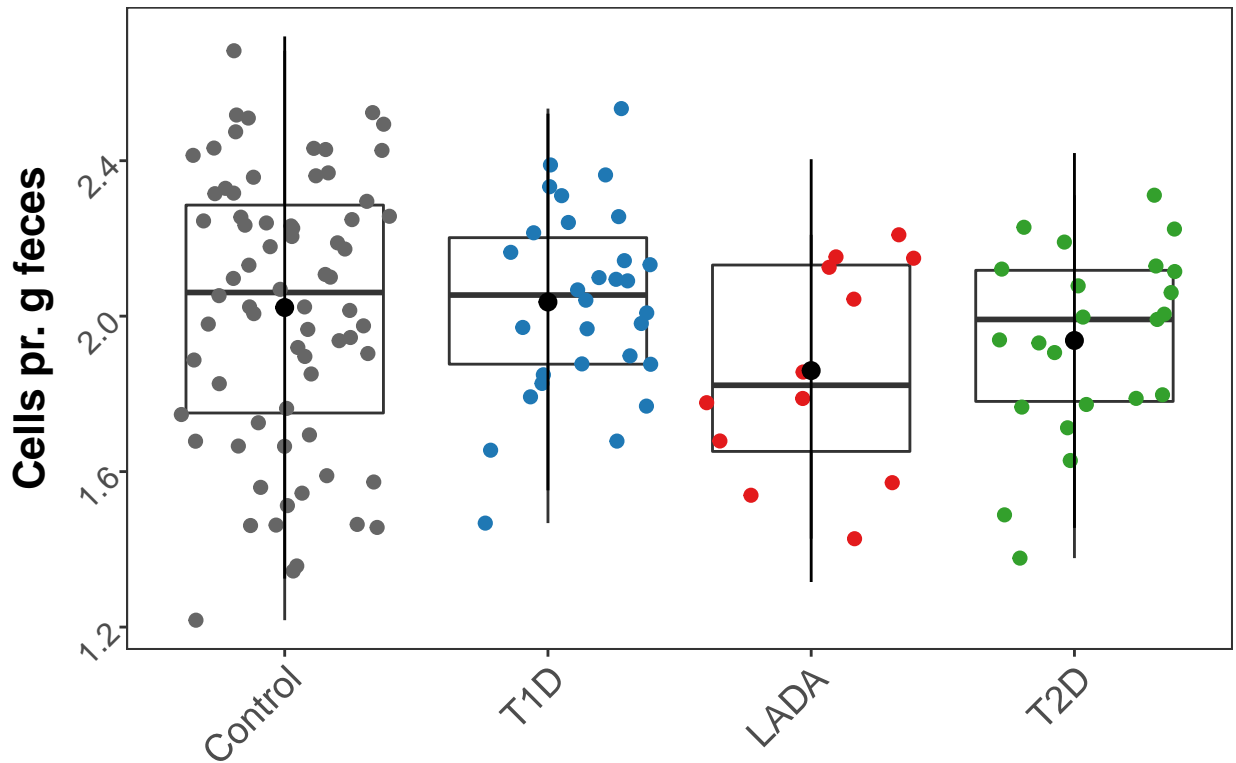

|      | pvalue    | padj      | Genus                                                            | compare         |
|------|-----------|-----------|------------------------------------------------------------------|-----------------|
| 456  | 0.0018916 | 0.0333090 | Phenylalanine__tyrosine_and_tryptophan_biosynthesis_PATH_ko00400 | LADA vs Control |
| 260  | 0.0126419 | 0.0629443 | Phenylalanine__tyrosine_and_tryptophan_biosynthesis_PATH_ko00400 | Control vs T2D  |
| 848  | 0.0387265 | 0.2312928 | Phenylalanine__tyrosine_and_tryptophan_biosynthesis_PATH_ko00400 | LADA vs T1D     |
| 64   | 0.2252529 | 0.4786856 | Phenylalanine__tyrosine_and_tryptophan_biosynthesis_PATH_ko00400 | Control vs T1D  |
| 652  | 0.2271650 | 0.6495082 | Phenylalanine__tyrosine_and_tryptophan_biosynthesis_PATH_ko00400 | T1D vs T2D      |
| 1044 | 0.2970618 | 0.8415375 | Phenylalanine__tyrosine_and_tryptophan_biosynthesis_PATH_ko00400 | LADA vs T2D     |

# Phenylalanine\_\_tyrosine\_and\_tryptopha

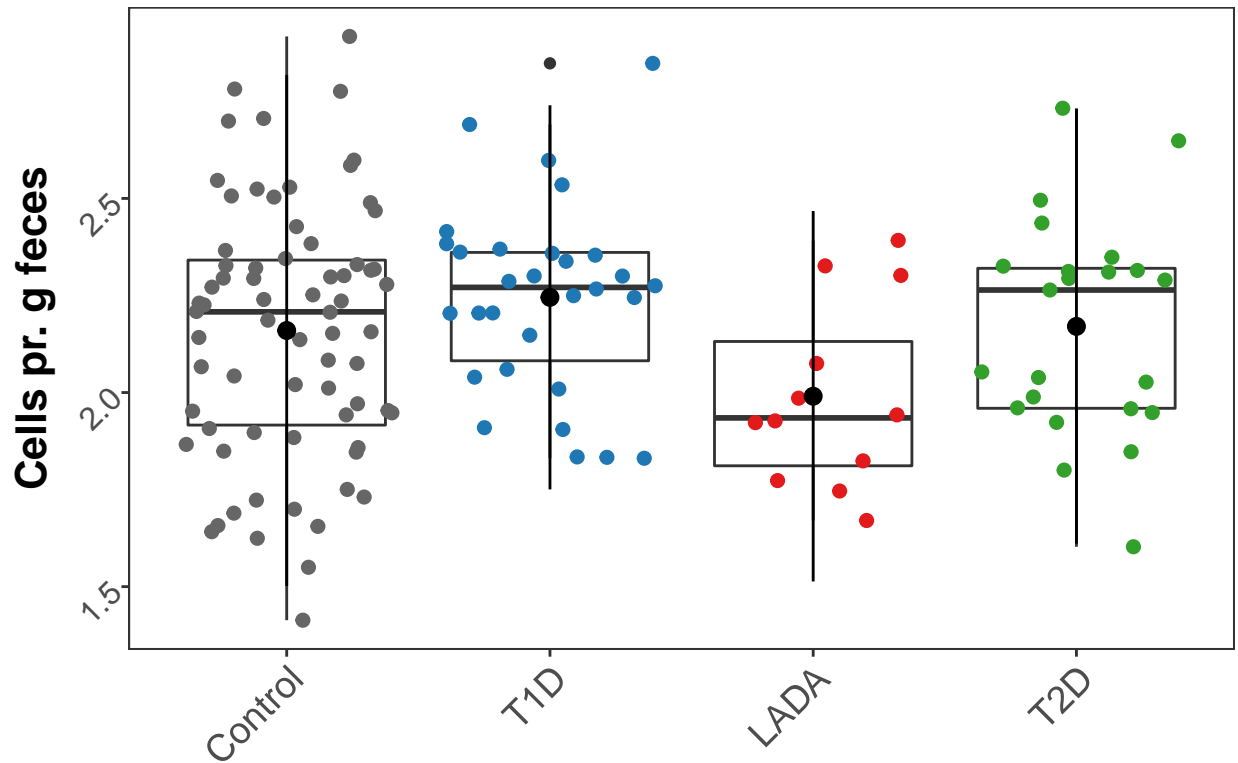

|      | pvalue    | padj      | Genus                                          | compare         |
|------|-----------|-----------|------------------------------------------------|-----------------|
| 532  | 0.0020387 | 0.0333090 | Pantothenate_and_CoA_biosynthesis_PATH_ko00770 | LADA vs Control |
| 336  | 0.0086860 | 0.0629443 | Pantothenate_and_CoA_biosynthesis_PATH_ko00770 | Control vs T2D  |
| 924  | 0.0537796 | 0.2312928 | Pantothenate_and_CoA_biosynthesis_PATH_ko00770 | LADA vs T1D     |
| 140  | 0.1622246 | 0.4612224 | Pantothenate_and_CoA_biosynthesis_PATH_ko00770 | Control vs T1D  |
| 728  | 0.2399097 | 0.6495082 | Pantothenate_and_CoA_biosynthesis_PATH_ko00770 | T1D vs T2D      |
| 1120 | 0.3496774 | 0.8415375 | Pantothenate_and_CoA_biosynthesis_PATH_ko00770 | LADA vs T2D     |

# Pantothenate\_and\_CoA\_biosynthesis\_P

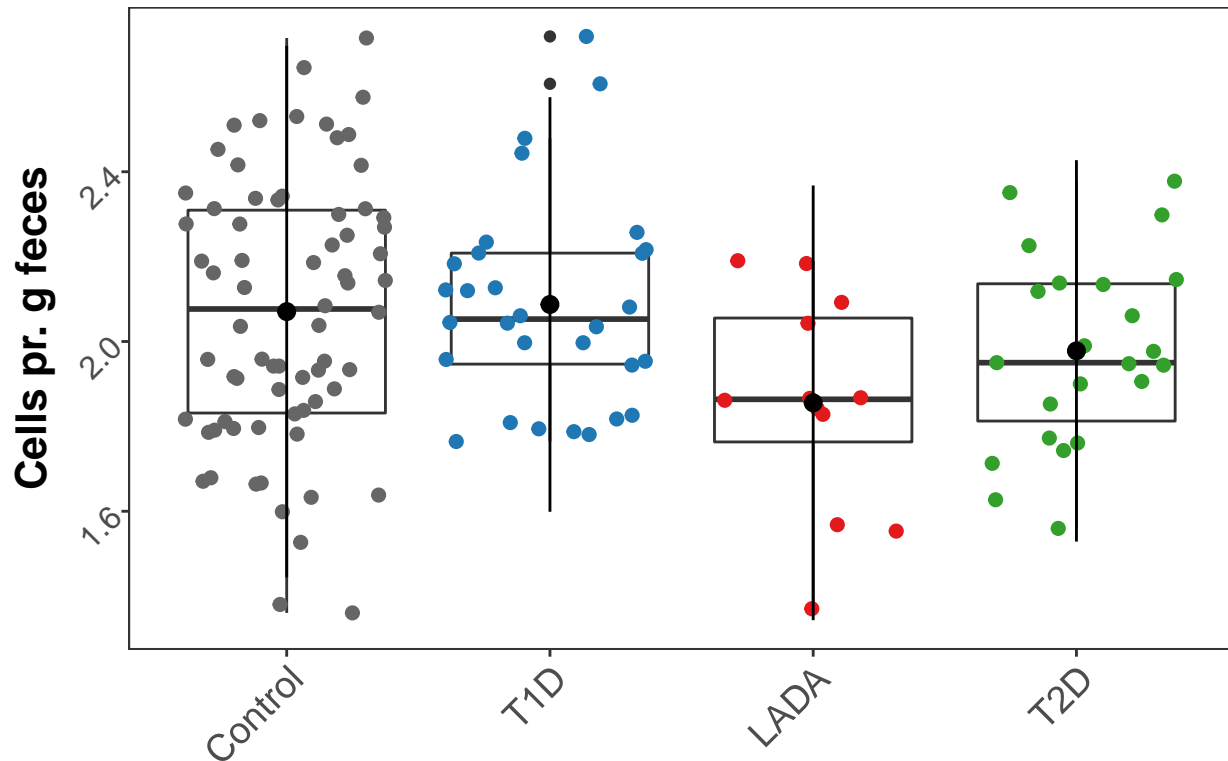

|      | pvalue    | padj      | Genus                       | compare         |
|------|-----------|-----------|-----------------------------|-----------------|
| 580  | 0.0020393 | 0.0333090 | Biosynthesis_of_amino_acids | LADA vs Control |
| 384  | 0.0127064 | 0.0629443 | Biosynthesis_of_amino_acids | Control vs T2D  |
| 972  | 0.0546752 | 0.2312928 | Biosynthesis_of_amino_acids | LADA vs T1D     |
| 188  | 0.1589208 | 0.4612224 | Biosynthesis_of_amino_acids | Control vs T1D  |
| 776  | 0.2929017 | 0.6495082 | Biosynthesis_of_amino_acids | T1D vs T2D      |
| 1168 | 0.3056394 | 0.8415375 | Biosynthesis_of_amino_acids | LADA vs T2D     |

# Biosynthesis\_of\_amino\_acids

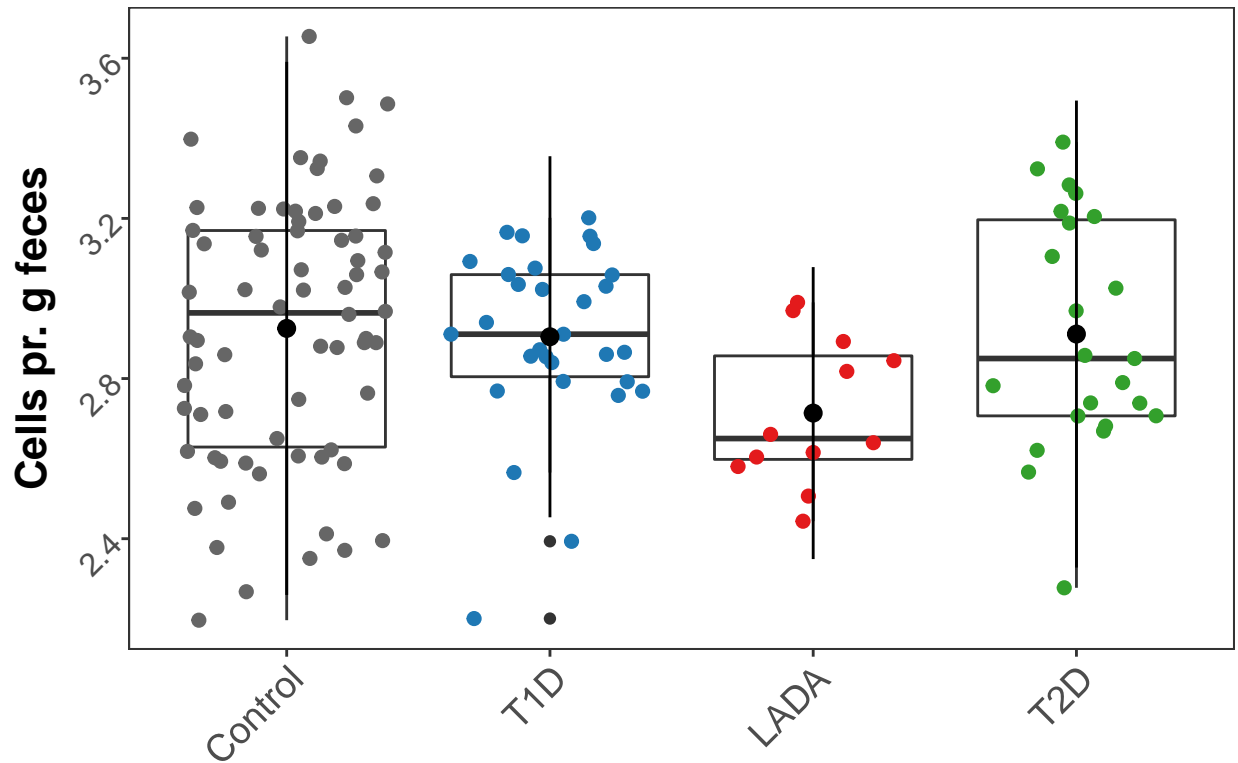

|      | pvalue    | padj      | Genus                                           | compare         |
|------|-----------|-----------|-------------------------------------------------|-----------------|
| 480  | 0.0023361 | 0.0346055 | C5_Branched_dibasic_acid_metabolism_PATH_ko0660 | LADA vs Control |
| 284  | 0.0204913 | 0.0661577 | C5_Branched_dibasic_acid_metabolism_PATH_ko0660 | Control vs T2D  |
| 872  | 0.0328969 | 0.2312928 | C5_Branched_dibasic_acid_metabolism_PATH_ko0660 | LADA vs T1D     |
| 88   | 0.3082702 | 0.5208704 | C5_Branched_dibasic_acid_metabolism_PATH_ko0660 | Control vs T1D  |
| 676  | 0.2273298 | 0.6495082 | C5_Branched_dibasic_acid_metabolism_PATH_ko0660 | LADA vs T2D     |
| 1068 | 0.2684490 | 0.8415375 | C5_Branched_dibasic_acid_metabolism_PATH_ko0660 | LADA vs T2D     |



## C5\_Branched\_dibasic\_acid\_metabolism

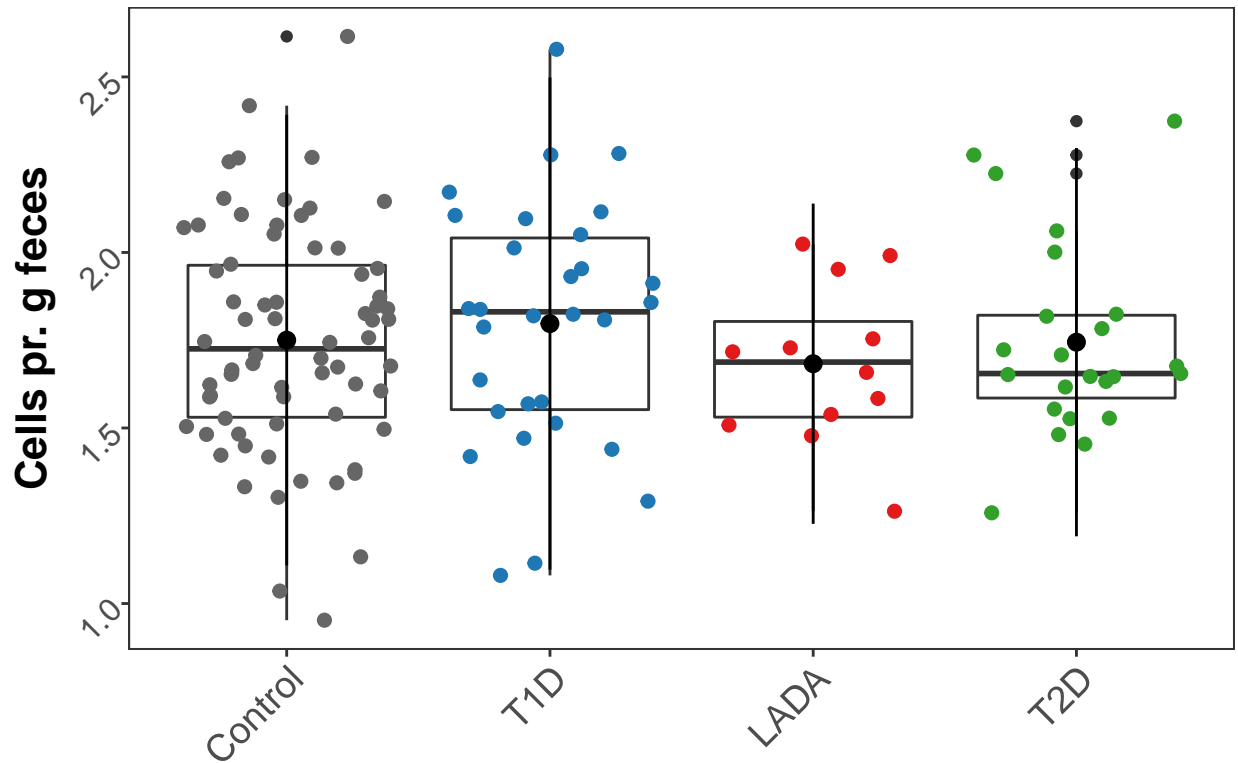

|      | pvalue    | padj      | Genus                       | compare         |
|------|-----------|-----------|-----------------------------|-----------------|
| 497  | 0.0026162 | 0.0346055 | Photosynthesis_PATH_ko00195 | LADA vs Control |
| 301  | 0.0056442 | 0.0629443 | Photosynthesis_PATH_ko00195 | Control vs T2D  |
| 105  | 0.0143556 | 0.2904843 | Photosynthesis_PATH_ko00195 | Control vs T1D  |
| 889  | 0.2345111 | 0.3940555 | Photosynthesis_PATH_ko00195 | LADA vs T1D     |
| 693  | 0.6365576 | 0.7539875 | Photosynthesis_PATH_ko00195 | T1D vs T2D      |
| 1085 | 0.4398030 | 0.8415375 | Photosynthesis_PATH_ko00195 | LADA vs T2D     |

# Photosynthesis\_PATH\_ko00195

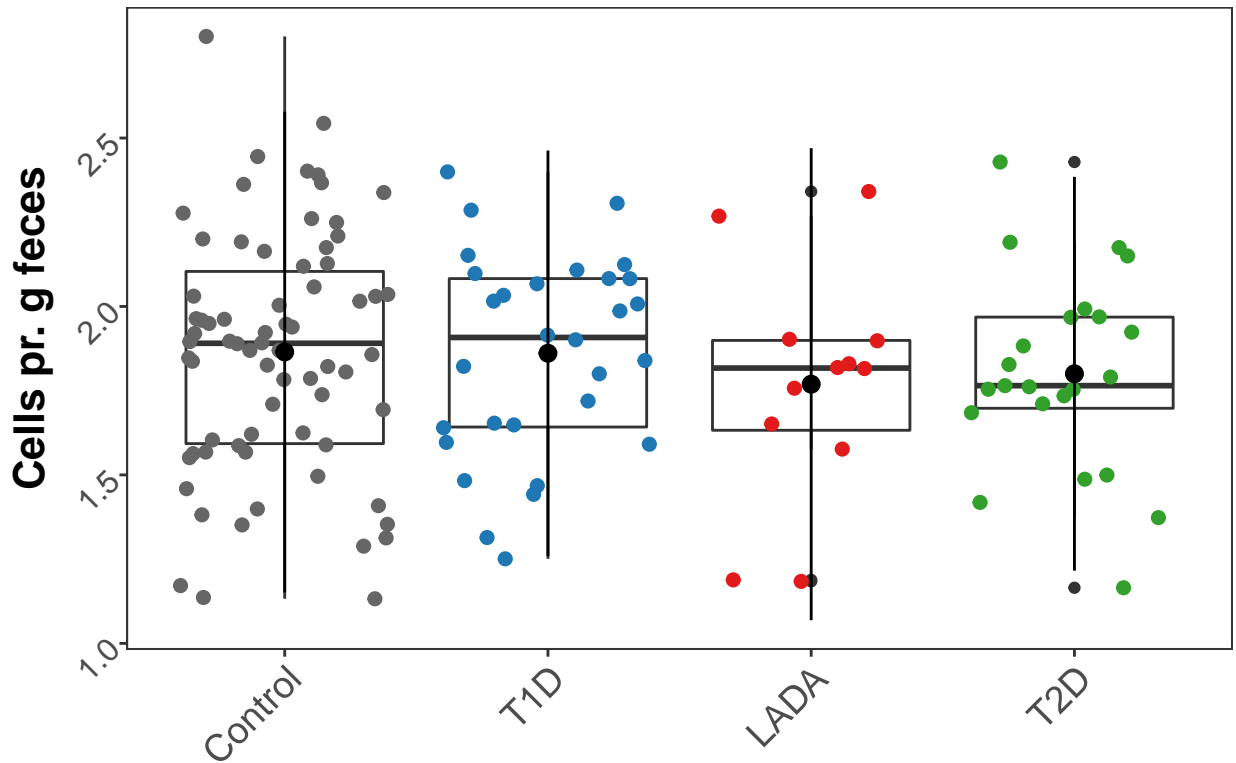

|      | pvalue    | padj      | Genus                              | compare         |
|------|-----------|-----------|------------------------------------|-----------------|
| 449  | 0.0030970 | 0.0346055 | Arginine_biosynthesis_PATH_ko00220 | LADA vs Control |
| 253  | 0.0164656 | 0.0629443 | Arginine_biosynthesis_PATH_ko00220 | Control vs T2D  |
| 841  | 0.0783535 | 0.2321553 | Arginine_biosynthesis_PATH_ko00220 | LADA vs T1D     |
| 57   | 0.1389304 | 0.4612224 | Arginine_biosynthesis_PATH_ko00220 | Control vs T1D  |
| 645  | 0.3603161 | 0.6495082 | Arginine_biosynthesis_PATH_ko00220 | T1D vs T2D      |
| 1037 | 0.3288157 | 0.8415375 | Arginine_biosynthesis_PATH_ko00220 | LADA vs T2D     |

# Arginine\_biosynthesis\_PATH\_ko00220

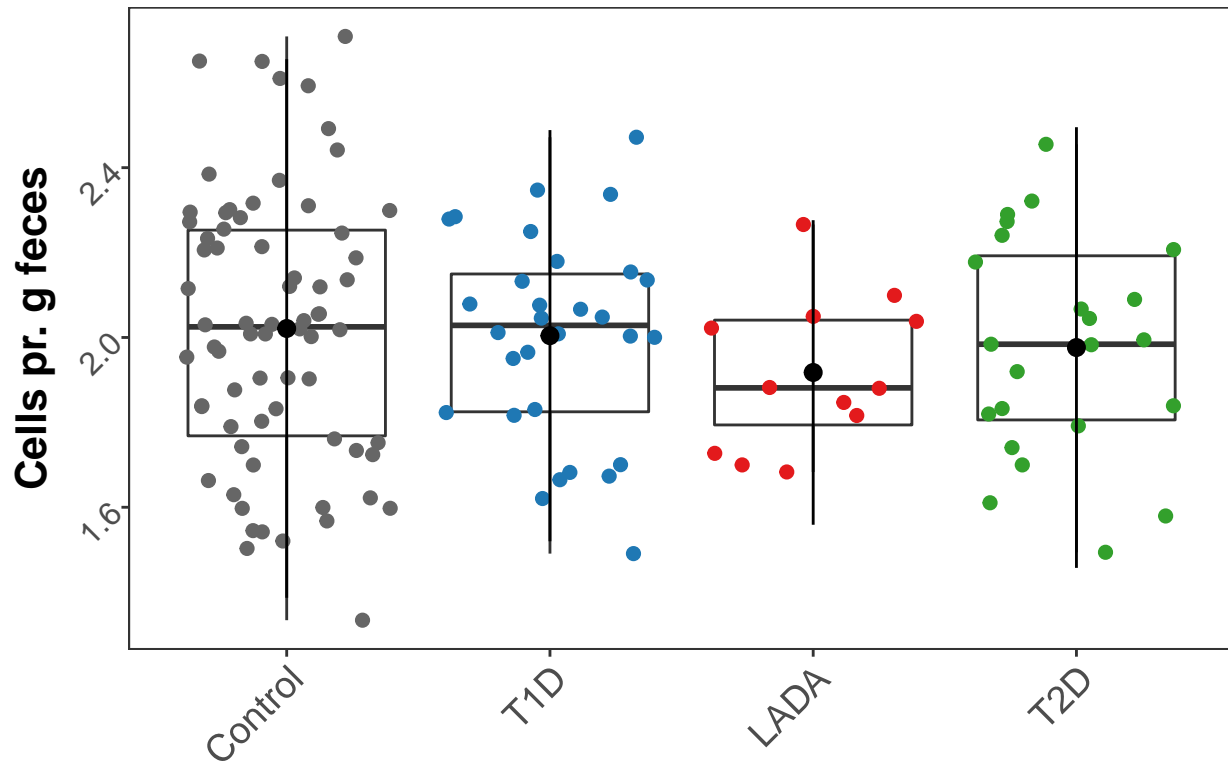

|      | pvalue    | padj      | Genus                                | compare         |
|------|-----------|-----------|--------------------------------------|-----------------|
| 518  | 0.0034891 | 0.0346055 | Glycerolipid_metabolism_PATH_ko00561 | LADA vs Control |
| 322  | 0.0040520 | 0.0629443 | Glycerolipid_metabolism_PATH_ko00561 | Control vs T2D  |
| 910  | 0.1367180 | 0.2954567 | Glycerolipid_metabolism_PATH_ko00561 | LADA vs T1D     |
| 126  | 0.0638894 | 0.3992571 | Glycerolipid_metabolism_PATH_ko00561 | Control vs T1D  |
| 714  | 0.3014038 | 0.6495082 | Glycerolipid_metabolism_PATH_ko00561 | T1D vs T2D      |
| 1106 | 0.5332410 | 0.8428648 | Glycerolipid_metabolism_PATH_ko00561 | LADA vs T2D     |

# Glycerolipid\_metabolism\_PATH\_ko0056'

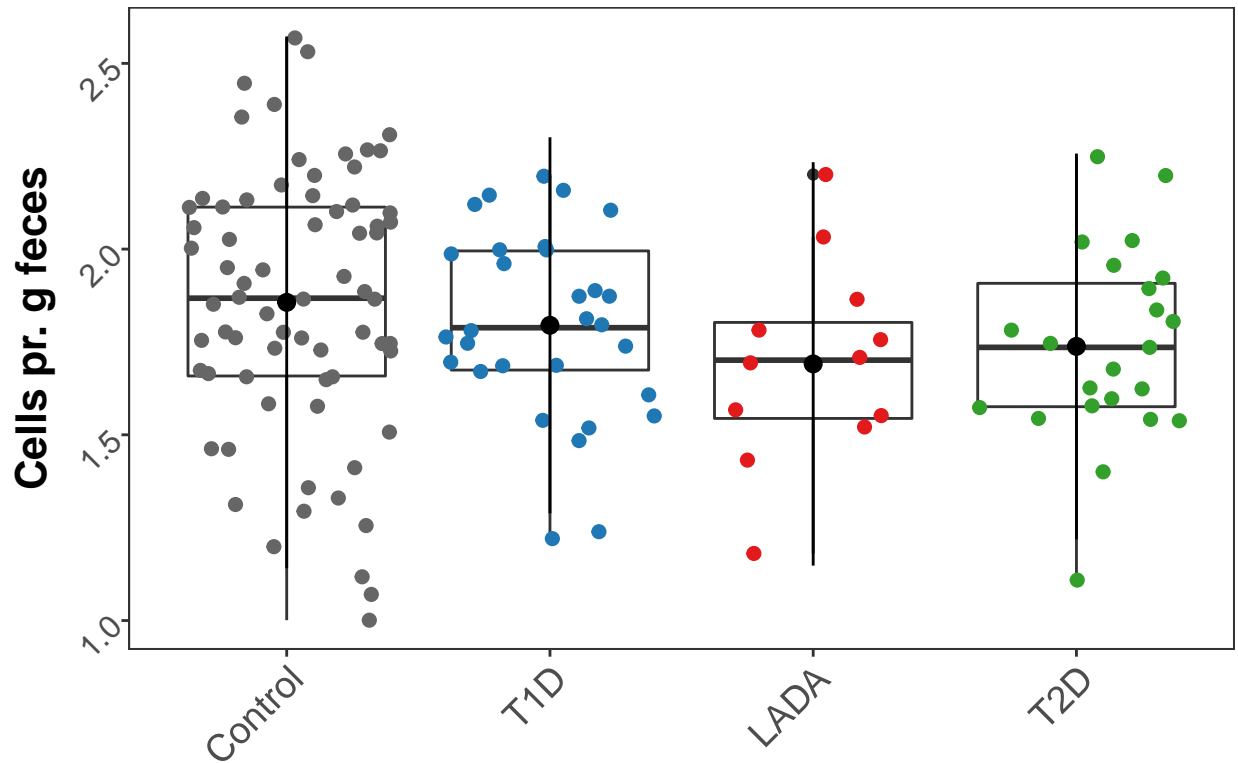

|      | pvalue    | padj      | Genus                                  | compare         |
|------|-----------|-----------|----------------------------------------|-----------------|
| 488  | 0.0036136 | 0.0346055 | Pentose_phosphate_pathway_PATH_ko00030 | LADA vs Control |
| 292  | 0.0155954 | 0.0629443 | Pentose_phosphate_pathway_PATH_ko00030 | Control vs T2D  |
| 880  | 0.1003267 | 0.2458003 | Pentose_phosphate_pathway_PATH_ko00030 | LADA vs T1D     |
| 96   | 0.1108369 | 0.4612224 | Pentose_phosphate_pathway_PATH_ko00030 | Control vs T1D  |
| 684  | 0.3999706 | 0.6495082 | Pentose_phosphate_pathway_PATH_ko00030 | T1D vs T2D      |
| 1076 | 0.3569896 | 0.8415375 | Pentose_phosphate_pathway_PATH_ko00030 | LADA vs T2D     |

# Pentose\_phosphate\_pathway\_PATH\_ko0

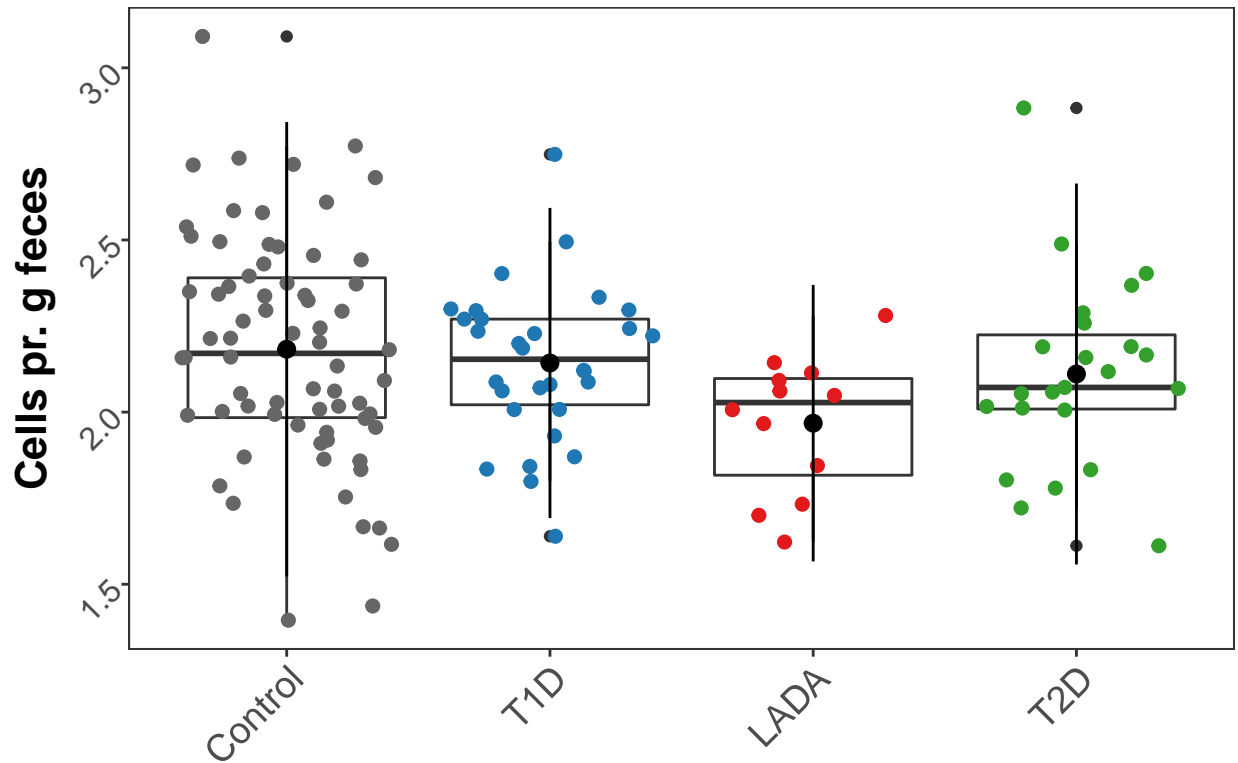

|      | pvalue    | padj      | Genus                                    | compare         |
|------|-----------|-----------|------------------------------------------|-----------------|
| 442  | 0.0036957 | 0.0346055 | Aminoacyl_tRNA_biosynthesis_PATH_ko00970 | LADA vs Control |
| 246  | 0.0270860 | 0.0676342 | Aminoacyl_tRNA_biosynthesis_PATH_ko00970 | Control vs T2D  |
| 834  | 0.0601947 | 0.2312928 | Aminoacyl_tRNA_biosynthesis_PATH_ko00970 | LADA vs T1D     |
| 50   | 0.2244304 | 0.4786856 | Aminoacyl_tRNA_biosynthesis_PATH_ko00970 | Control vs T1D  |
| 638  | 0.3369466 | 0.6495082 | Aminoacyl_tRNA_biosynthesis_PATH_ko00970 | T1D vs T2D      |
| 1030 | 0.2912837 | 0.8415375 | Aminoacyl_tRNA_biosynthesis_PATH_ko00970 | LADA vs T2D     |

# Aminoacyl\_tRNA\_biosynthesis\_PATH\_k

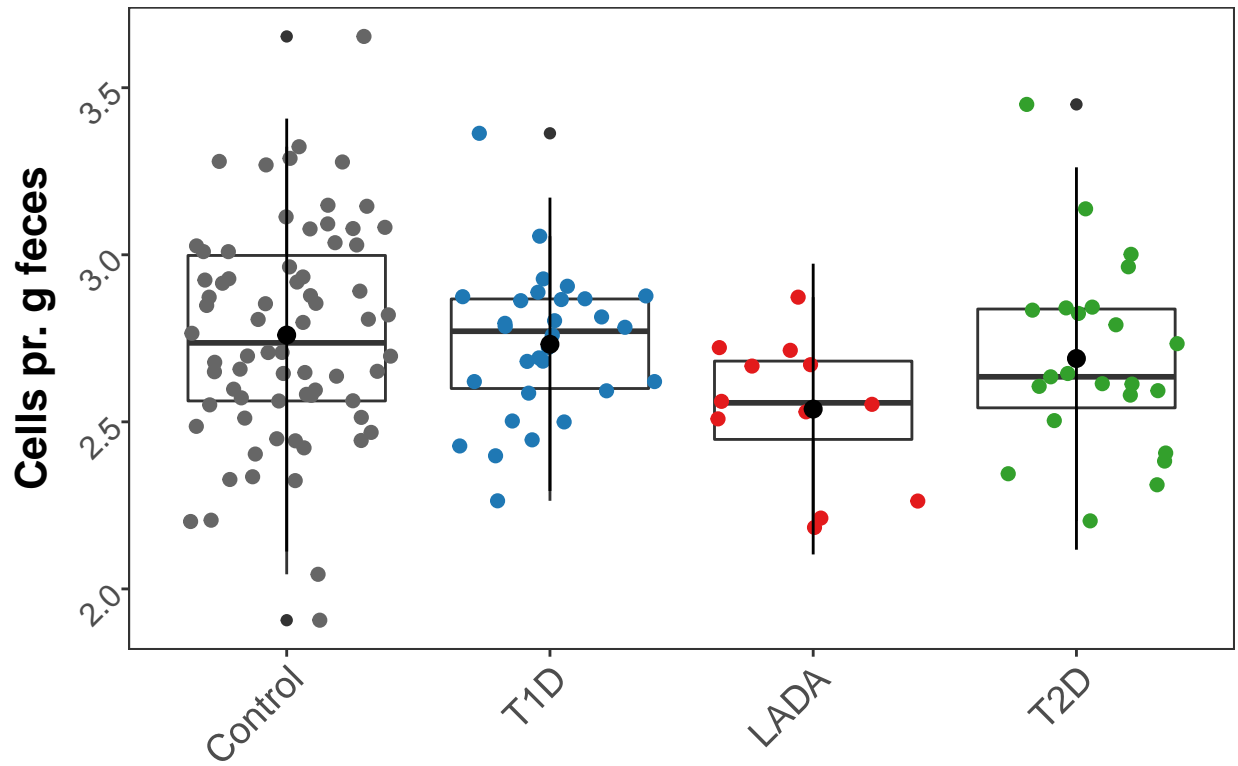

|      | pvalue    | padj      | Genus                            | compare         |
|------|-----------|-----------|----------------------------------|-----------------|
| 453  | 0.0037616 | 0.0346055 | Lysine_biosynthesis_PATH_ko00300 | LADA vs Control |
| 257  | 0.0168290 | 0.0629443 | Lysine_biosynthesis_PATH_ko00300 | Control vs T2D  |
| 845  | 0.0639477 | 0.2312928 | Lysine_biosynthesis_PATH_ko00300 | LADA vs T1D     |
| 61   | 0.2117082 | 0.4786856 | Lysine_biosynthesis_PATH_ko00300 | Control vs T1D  |
| 649  | 0.2758781 | 0.6495082 | Lysine_biosynthesis_PATH_ko00300 | T1D vs T2D      |
| 1041 | 0.3529573 | 0.8415375 | Lysine_biosynthesis_PATH_ko00300 | LADA vs T2D     |

# Lysine\_biosynthesis\_PATH\_ko00300

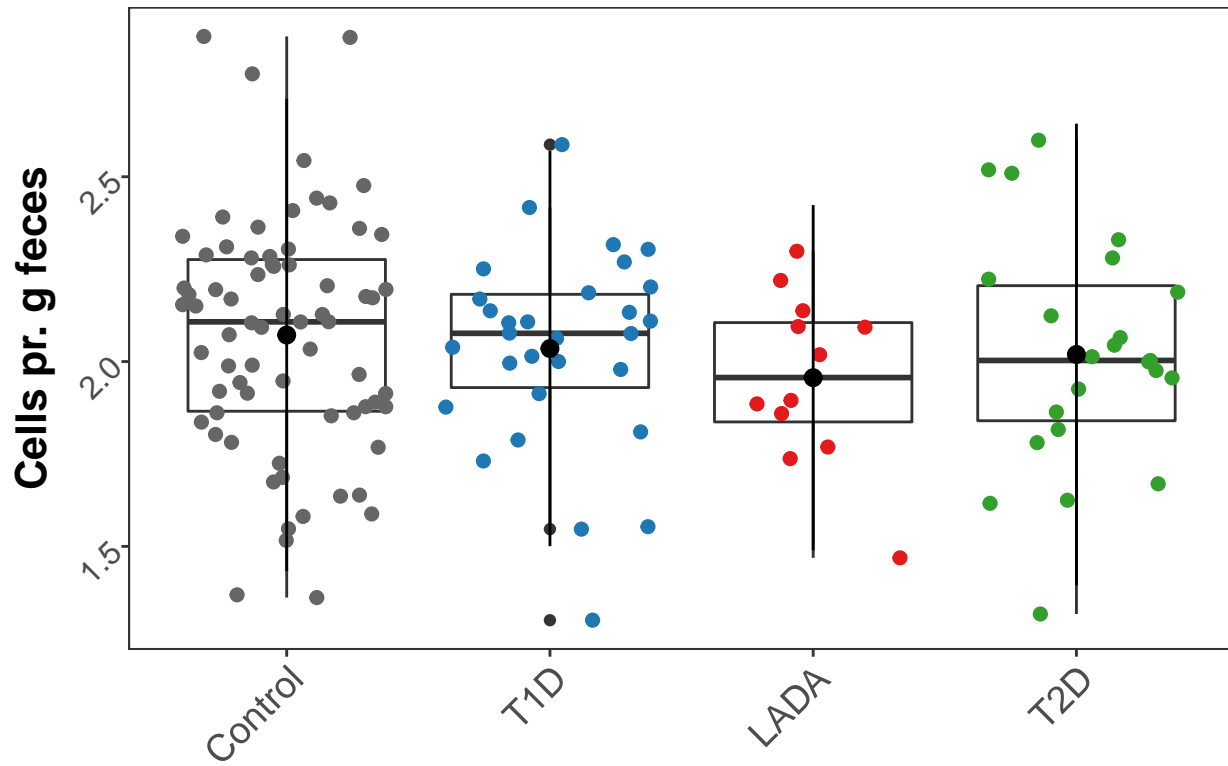

|      | pvalue    | padj      | Genus                       | compare         |
|------|-----------|-----------|-----------------------------|-----------------|
| 581  | 0.0042931 | 0.0346055 | Biosynthesis_of_antibiotics | LADA vs Control |
| 385  | 0.0179296 | 0.0629443 | Biosynthesis_of_antibiotics | Control vs T2D  |
| 973  | 0.0640528 | 0.2312928 | Biosynthesis_of_antibiotics | LADA vs T1D     |
| 189  | 0.2339251 | 0.4839499 | Biosynthesis_of_antibiotics | Control vs T1D  |
| 777  | 0.2646391 | 0.6495082 | Biosynthesis_of_antibiotics | T1D vs T2D      |
| 1169 | 0.3638604 | 0.8415375 | Biosynthesis_of_antibiotics | LADA vs T2D     |

# Biosynthesis\_of\_antibiotics

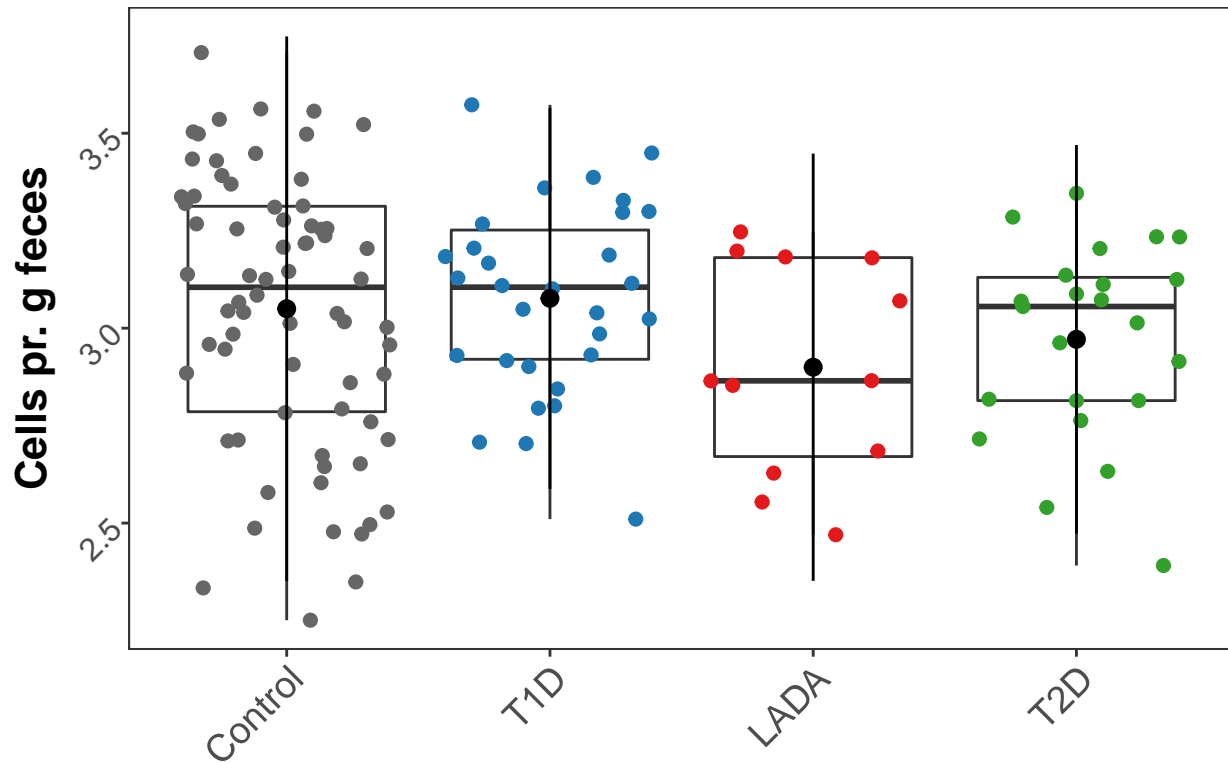

|      | pvalue    | padj      | Genus                                  | compare         |
|------|-----------|-----------|----------------------------------------|-----------------|
| 475  | 0.0043675 | 0.0346055 | Streptomycin_biosynthesis_PATH_ko00521 | LADA vs Control |
| 279  | 0.0616025 | 0.0996512 | Streptomycin_biosynthesis_PATH_ko00521 | Control vs T2D  |
| 867  | 0.0442686 | 0.2312928 | Streptomycin_biosynthesis_PATH_ko00521 | LADA vs T1D     |
| 83   | 0.3510858 | 0.5414362 | Streptomycin_biosynthesis_PATH_ko00521 | Control vs T1D  |
| 671  | 0.3752407 | 0.6495082 | Streptomycin_biosynthesis_PATH_ko00521 | T1D vs T2D      |
| 1063 | 0.2152327 | 0.8415375 | Streptomycin_biosynthesis_PATH_ko00521 | LADA vs T2D     |



# Streptomycin\_biosynthesis\_PATH\_ko00900

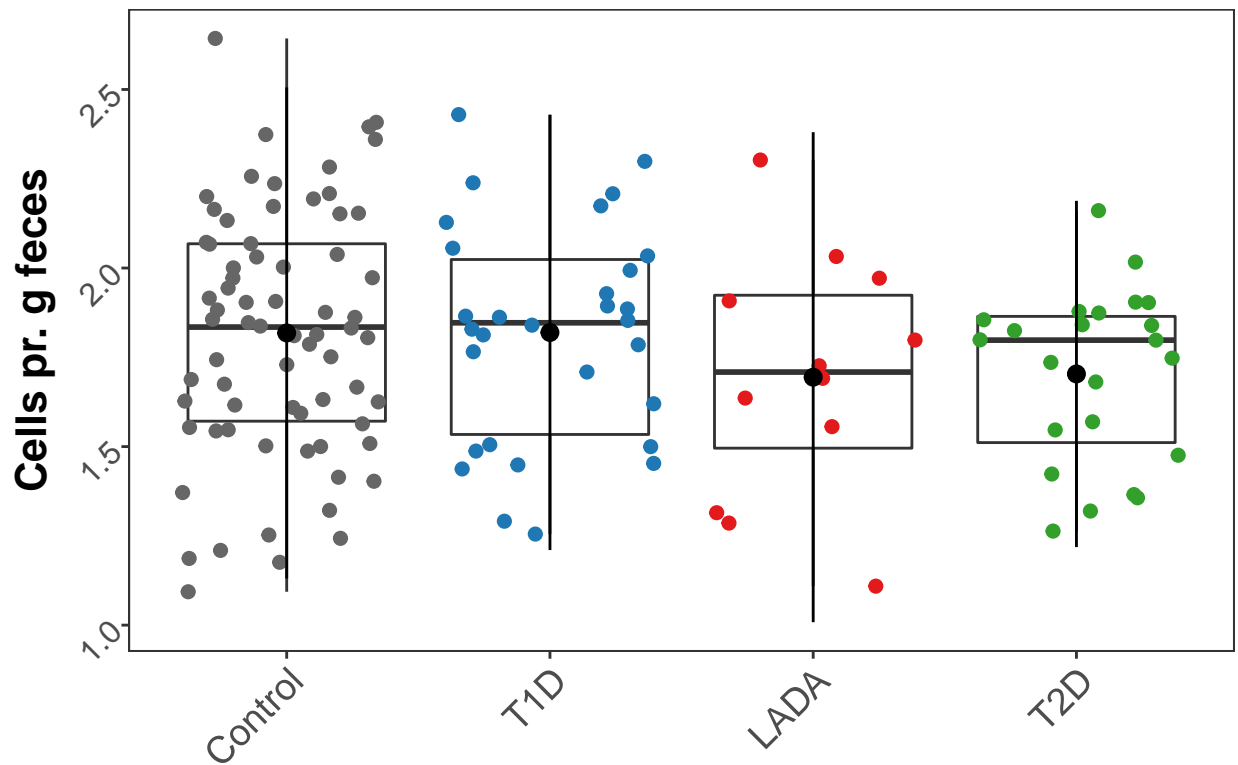

|      | pvalue    | padj      | Genus                                        | compare         |
|------|-----------|-----------|----------------------------------------------|-----------------|
| 558  | 0.0045024 | 0.0346055 | Terpenoid_backbone_biosynthesis_PATH_ko00900 | LADA vs Control |
| 362  | 0.0150679 | 0.0629443 | Terpenoid_backbone_biosynthesis_PATH_ko00900 | Control vs T2D  |
| 950  | 0.0797460 | 0.2321553 | Terpenoid_backbone_biosynthesis_PATH_ko00900 | LADA vs T1D     |
| 166  | 0.1853051 | 0.4762288 | Terpenoid_backbone_biosynthesis_PATH_ko00900 | Control vs T1D  |
| 754  | 0.2868863 | 0.6495082 | Terpenoid_backbone_biosynthesis_PATH_ko00900 | T1D vs T2D      |
| 1146 | 0.3943428 | 0.8415375 | Terpenoid_backbone_biosynthesis_PATH_ko00900 | LADA vs T2D     |

# Terpenoid\_backbone\_biosynthesis\_PATH

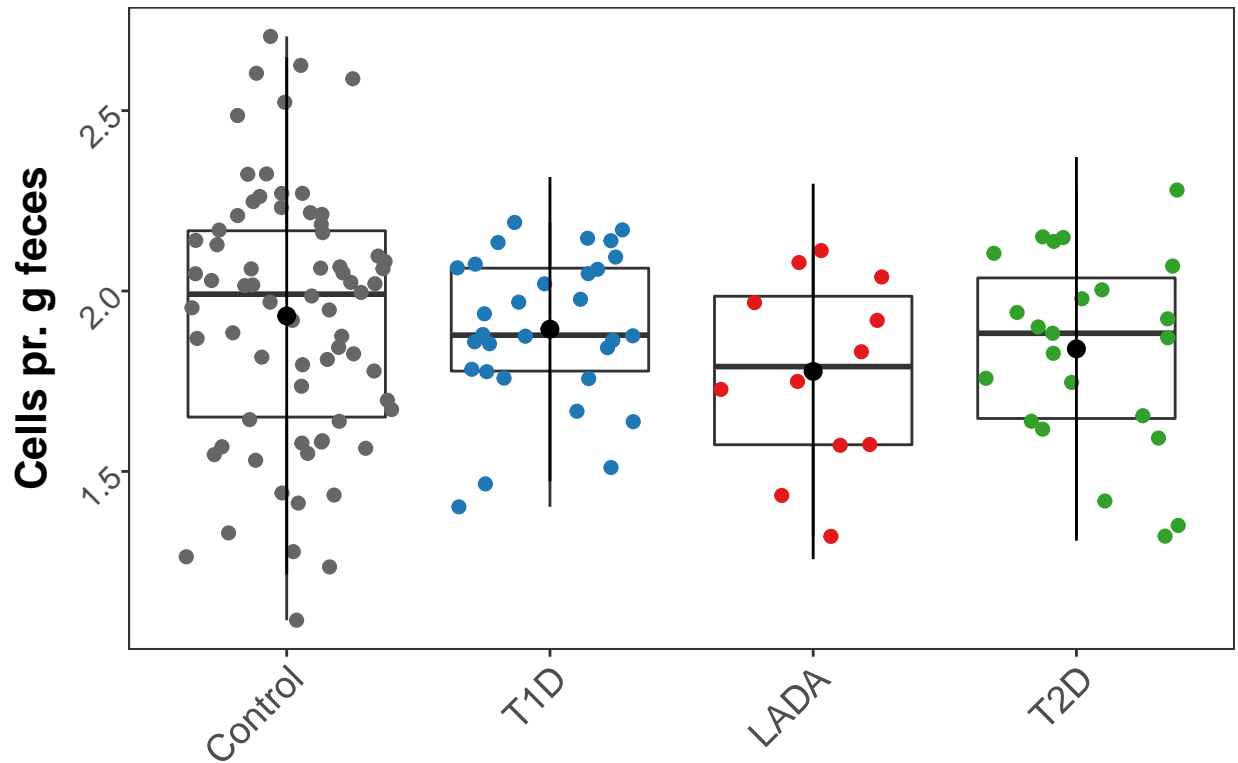

|      | pvalue    | padj      | Genus                                   | compare         |
|------|-----------|-----------|-----------------------------------------|-----------------|
| 439  | 0.0047446 | 0.0346055 | Nucleotide_excision_repair_PATH_ko03420 | LADA vs Control |
| 243  | 0.0307505 | 0.0681056 | Nucleotide_excision_repair_PATH_ko03420 | Control vs T2D  |
| 831  | 0.0785437 | 0.2321553 | Nucleotide_excision_repair_PATH_ko03420 | LADA vs T1D     |
| 47   | 0.1971887 | 0.4786856 | Nucleotide_excision_repair_PATH_ko03420 | Control vs T1D  |
| 635  | 0.3908968 | 0.6495082 | Nucleotide_excision_repair_PATH_ko03420 | T1D vs T2D      |
| 1027 | 0.3079132 | 0.8415375 | Nucleotide_excision_repair_PATH_ko03420 | LADA vs T2D     |

# Nucleotide\_excision\_repair\_PATH\_ko034

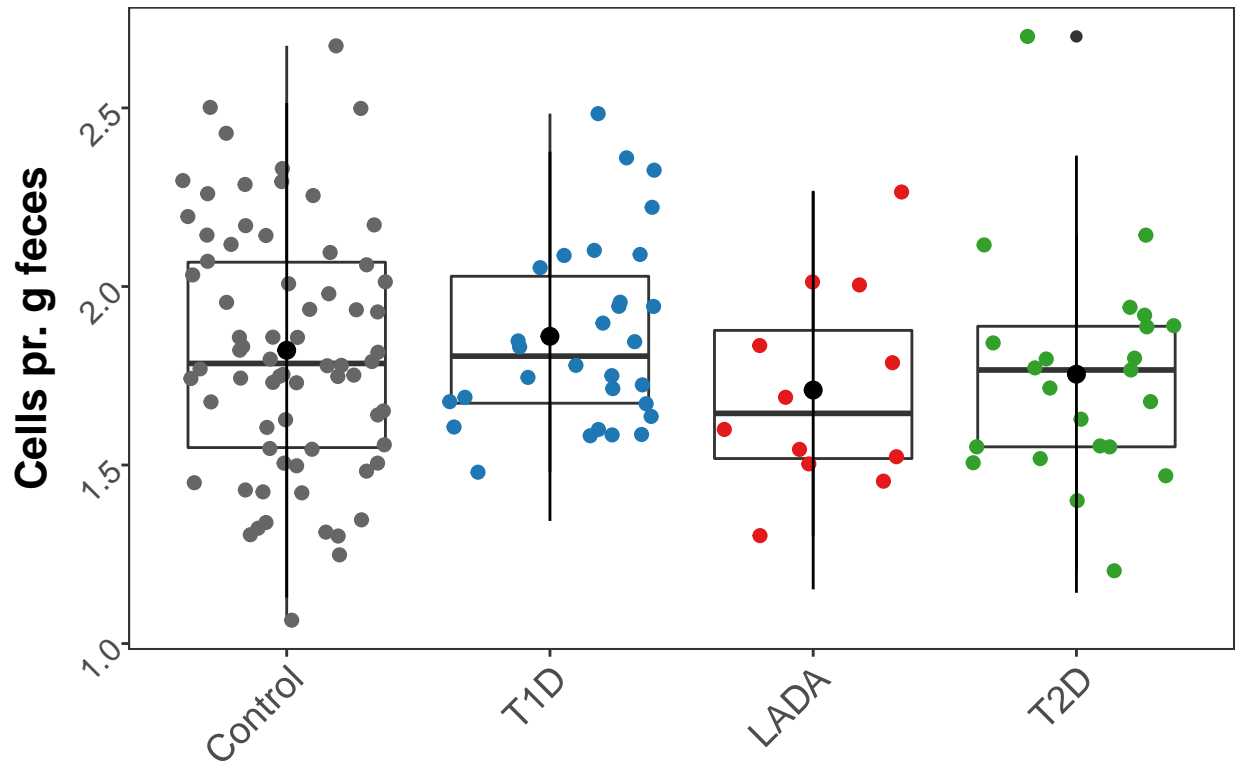

|      | pvalue    | padj      | Genus                                  | compare         |
|------|-----------|-----------|----------------------------------------|-----------------|
| 546  | 0.0047919 | 0.0346055 | Selenocompound_metabolism_PATH_ko00450 | LADA vs Control |
| 350  | 0.0132910 | 0.0629443 | Selenocompound_metabolism_PATH_ko00450 | Control vs T2D  |
| 938  | 0.1533177 | 0.3130237 | Selenocompound_metabolism_PATH_ko00450 | LADA vs T1D     |
| 154  | 0.0712959 | 0.3992571 | Selenocompound_metabolism_PATH_ko00450 | Control vs T1D  |
| 742  | 0.4672432 | 0.6743371 | Selenocompound_metabolism_PATH_ko00450 | T1D vs T2D      |
| 1134 | 0.4215018 | 0.8415375 | Selenocompound_metabolism_PATH_ko00450 | LADA vs T2D     |

# Selenocompound\_metabolism\_PATH\_kc

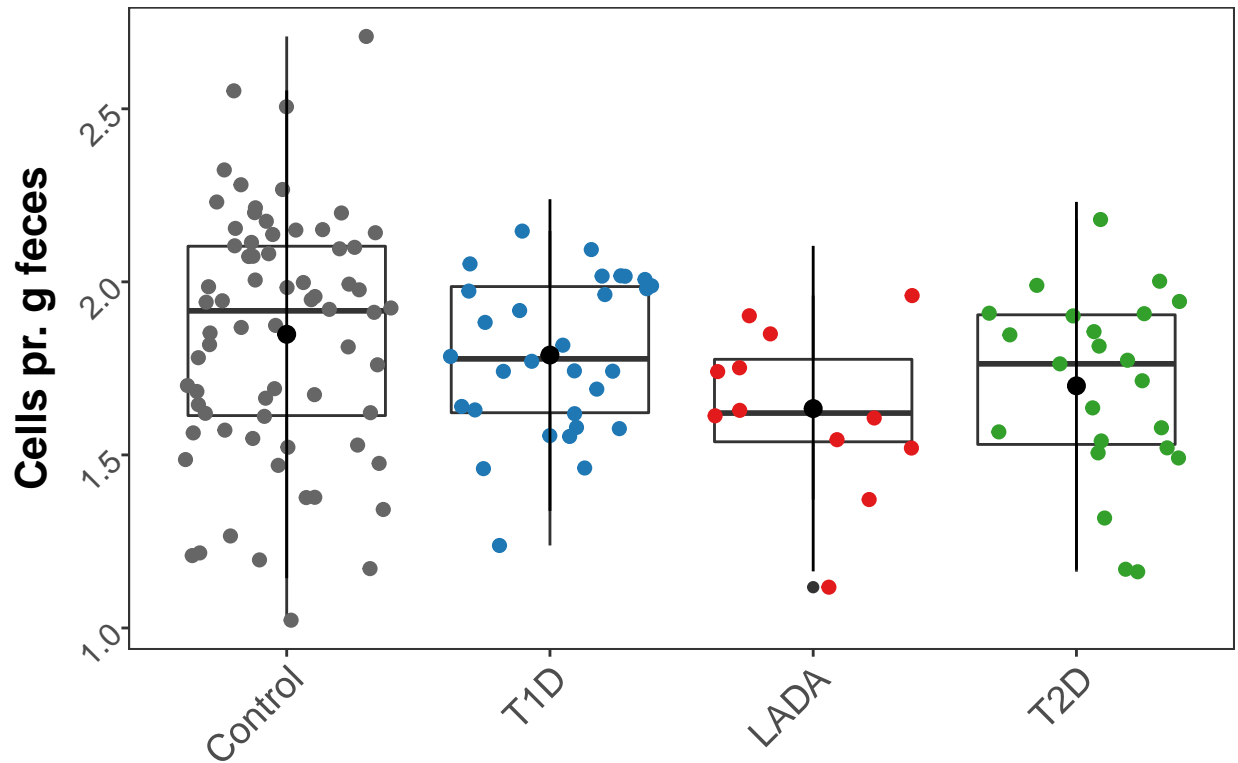

|      | pvalue    | padj      | Genus                                                   | compare            |
|------|-----------|-----------|---------------------------------------------------------|--------------------|
| 492  | 0.0048108 | 0.0346055 | Carbon_fixation_in_photosynthetic_organisms_PATH_K00710 | Control vs Control |
| 296  | 0.0102169 | 0.0629443 | Carbon_fixation_in_photosynthetic_organisms_PATH_K00710 | Control vs T2D     |
| 884  | 0.1447090 | 0.3082930 | Carbon_fixation_in_photosynthetic_organisms_PATH_K00710 | Control vs T1D     |
| 100  | 0.0794411 | 0.4208232 | Carbon_fixation_in_photosynthetic_organisms_PATH_K00710 | Control vs T1D     |
| 688  | 0.3973843 | 0.6495082 | Carbon_fixation_in_photosynthetic_organisms_PATH_K00710 | Control vs T2D     |
| 1080 | 0.4591388 | 0.8415375 | Carbon_fixation_in_photosynthetic_organisms_PATH_K00710 | Control vs T2D     |

# Carbon\_fixation\_in\_photosynthetic\_organism

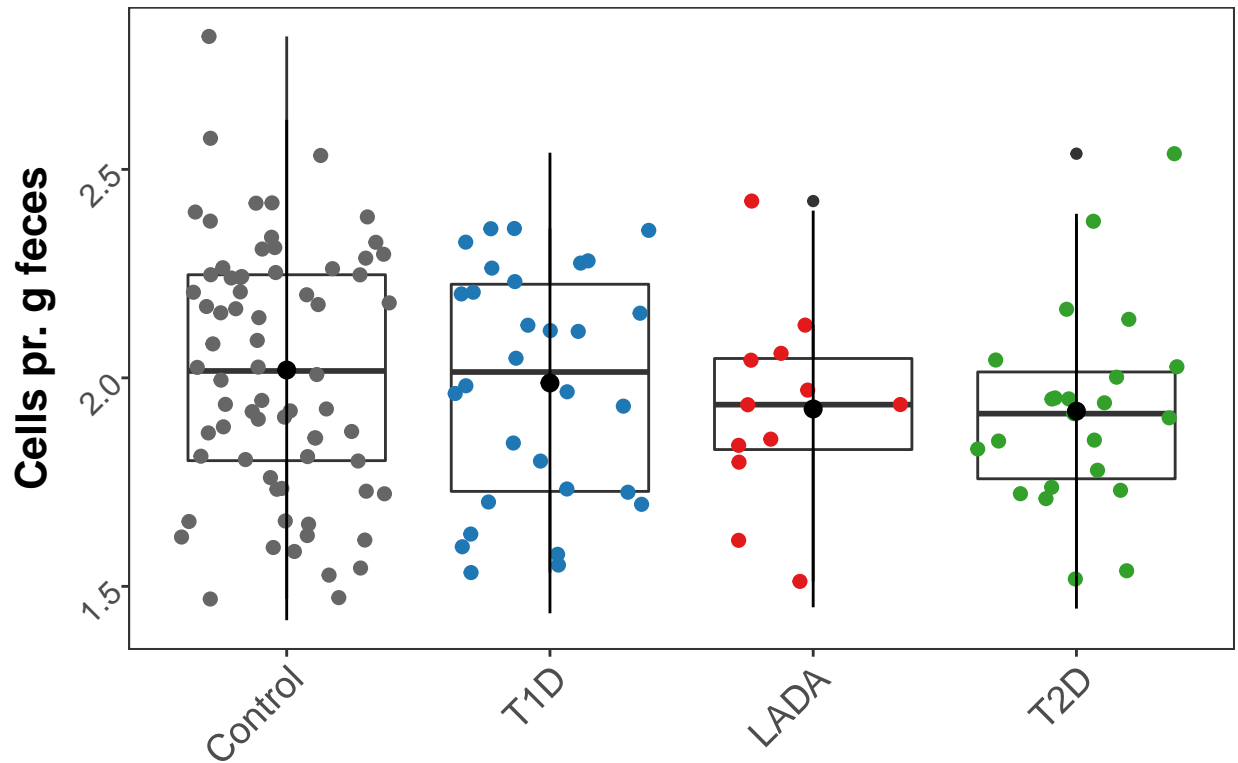

|      | pvalue    | padj      | Genus                                           | compare         |
|------|-----------|-----------|-------------------------------------------------|-----------------|
| 450  | 0.0049114 | 0.0346055 | Cysteine_and_methionine_metabolism_PATH_ko00270 | LADA vs Control |
| 254  | 0.0176013 | 0.0629443 | Cysteine_and_methionine_metabolism_PATH_ko00270 | Control vs T2D  |
| 842  | 0.0886413 | 0.2443633 | Cysteine_and_methionine_metabolism_PATH_ko00270 | LADA vs T1D     |
| 58   | 0.1731049 | 0.4762288 | Cysteine_and_methionine_metabolism_PATH_ko00270 | Control vs T1D  |
| 646  | 0.3241323 | 0.6495082 | Cysteine_and_methionine_metabolism_PATH_ko00270 | T1D vs T2D      |
| 1038 | 0.3866531 | 0.8415375 | Cysteine_and_methionine_metabolism_PATH_ko00270 | LADA vs T2D     |

# Cysteine\_and\_methionine\_metabolism\_

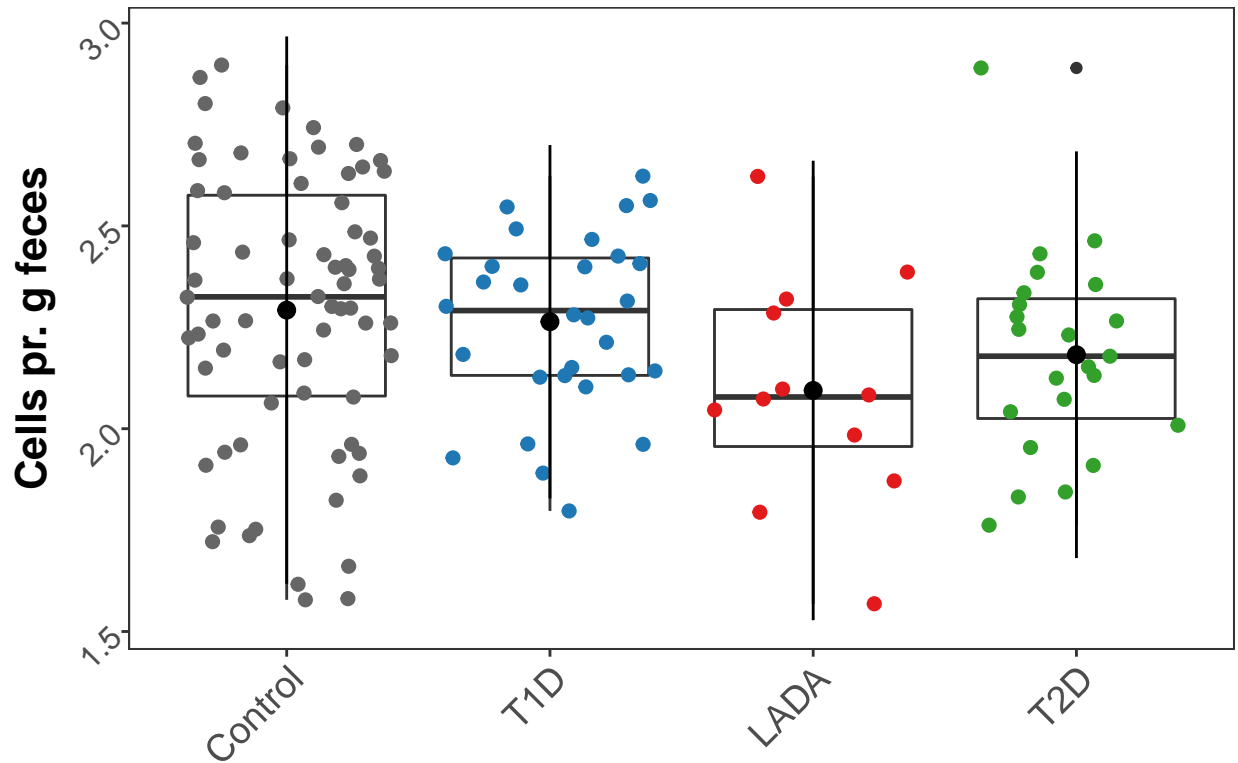

|      | pvalue    | padj      | Genus                                | compare         |
|------|-----------|-----------|--------------------------------------|-----------------|
| 464  | 0.0051318 | 0.0346055 | Carbapenem_biosynthesis_PATH_ko00332 | LADA vs Control |
| 268  | 0.0160134 | 0.0629443 | Carbapenem_biosynthesis_PATH_ko00332 | Control vs T2D  |
| 856  | 0.2079393 | 0.3628392 | Carbapenem_biosynthesis_PATH_ko00332 | LADA vs T1D     |
| 72   | 0.0417515 | 0.3989340 | Carbapenem_biosynthesis_PATH_ko00332 | Control vs T1D  |
| 660  | 0.6272200 | 0.7496044 | Carbapenem_biosynthesis_PATH_ko00332 | T1D vs T2D      |
| 1052 | 0.4066123 | 0.8415375 | Carbapenem_biosynthesis_PATH_ko00332 | LADA vs T2D     |

# Carbapenem\_biosynthesis\_PATH\_ko003

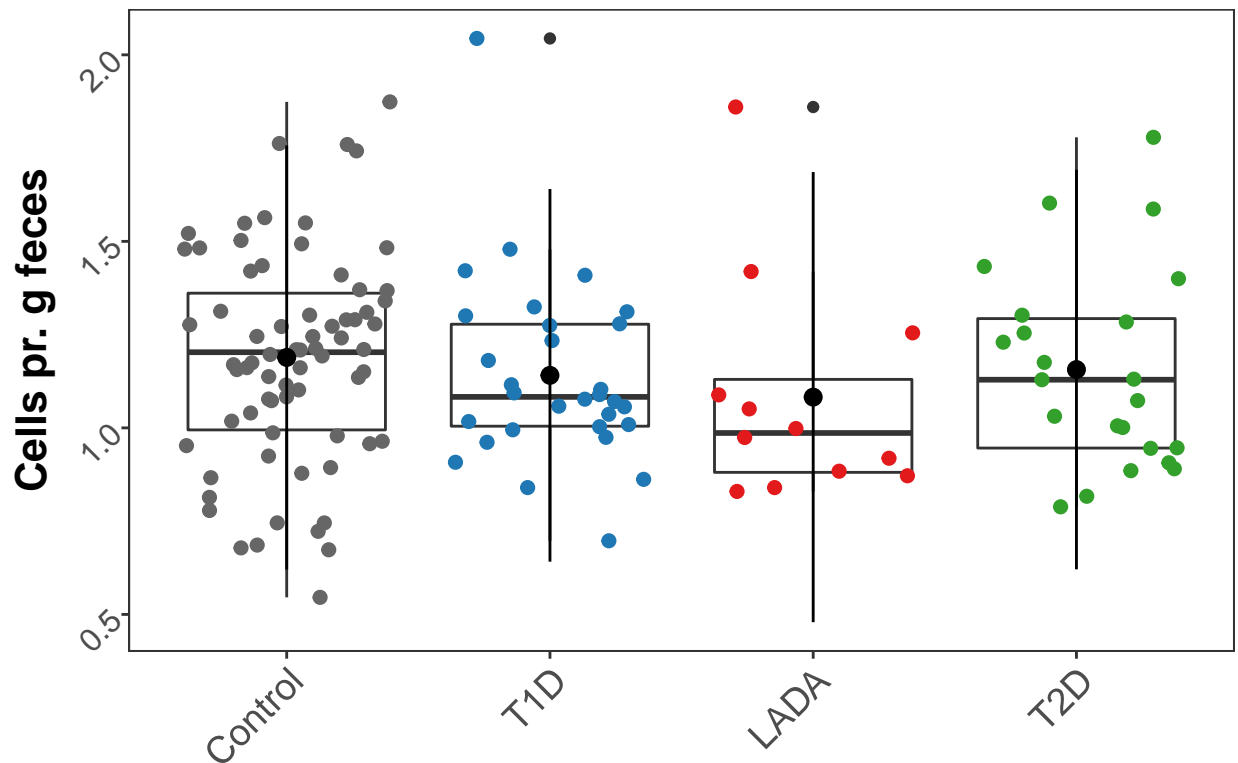

|      | pvalue    | padj      | Genus                                 | compare         |
|------|-----------|-----------|---------------------------------------|-----------------|
| 582  | 0.0052285 | 0.0346055 | Biosynthesis_of_secondary_metabolites | LADA vs Control |
| 386  | 0.0154866 | 0.0629443 | Biosynthesis_of_secondary_metabolites | Control vs T2D  |
| 974  | 0.0897661 | 0.2443633 | Biosynthesis_of_secondary_metabolites | LADA vs T1D     |
| 190  | 0.1793504 | 0.4762288 | Biosynthesis_of_secondary_metabolites | Control vs T1D  |
| 778  | 0.2973876 | 0.6495082 | Biosynthesis_of_secondary_metabolites | T1D vs T2D      |
| 1170 | 0.4143008 | 0.8415375 | Biosynthesis_of_secondary_metabolites | LADA vs T2D     |

# Biosynthesis\_of\_secondary\_metabolites

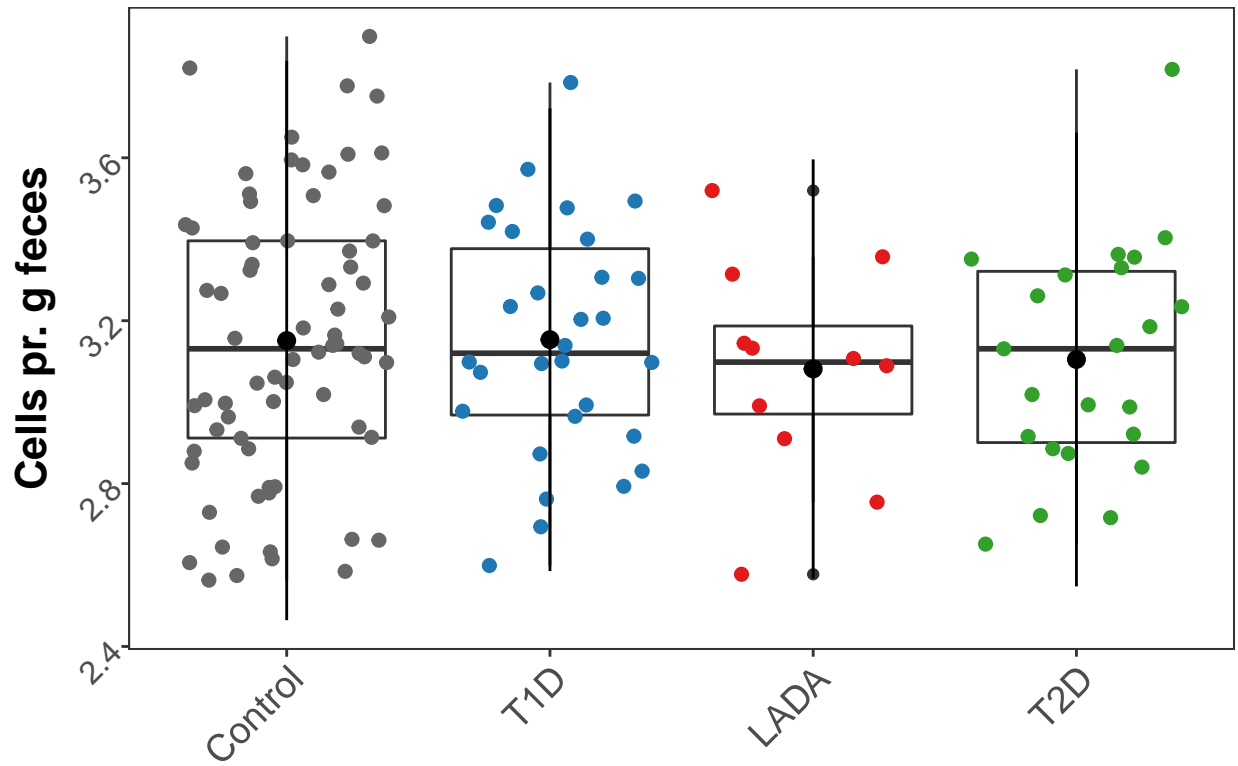

|      | pvalue    | padj      | Genus                        | compare         |
|------|-----------|-----------|------------------------------|-----------------|
| 434  | 0.0053967 | 0.0346055 | DNA_replication_PATH_ko03030 | LADA vs Control |
| 238  | 0.0403649 | 0.0767378 | DNA_replication_PATH_ko03030 | Control vs T2D  |
| 826  | 0.0474250 | 0.2312928 | DNA_replication_PATH_ko03030 | LADA vs T1D     |
| 42   | 0.3785154 | 0.5578121 | DNA_replication_PATH_ko03030 | Control vs T1D  |
| 630  | 0.2782070 | 0.6495082 | DNA_replication_PATH_ko03030 | T1D vs T2D      |
| 1022 | 0.2902359 | 0.8415375 | DNA_replication_PATH_ko03030 | LADA vs T2D     |



# DNA\_replication\_PATH\_ko03030

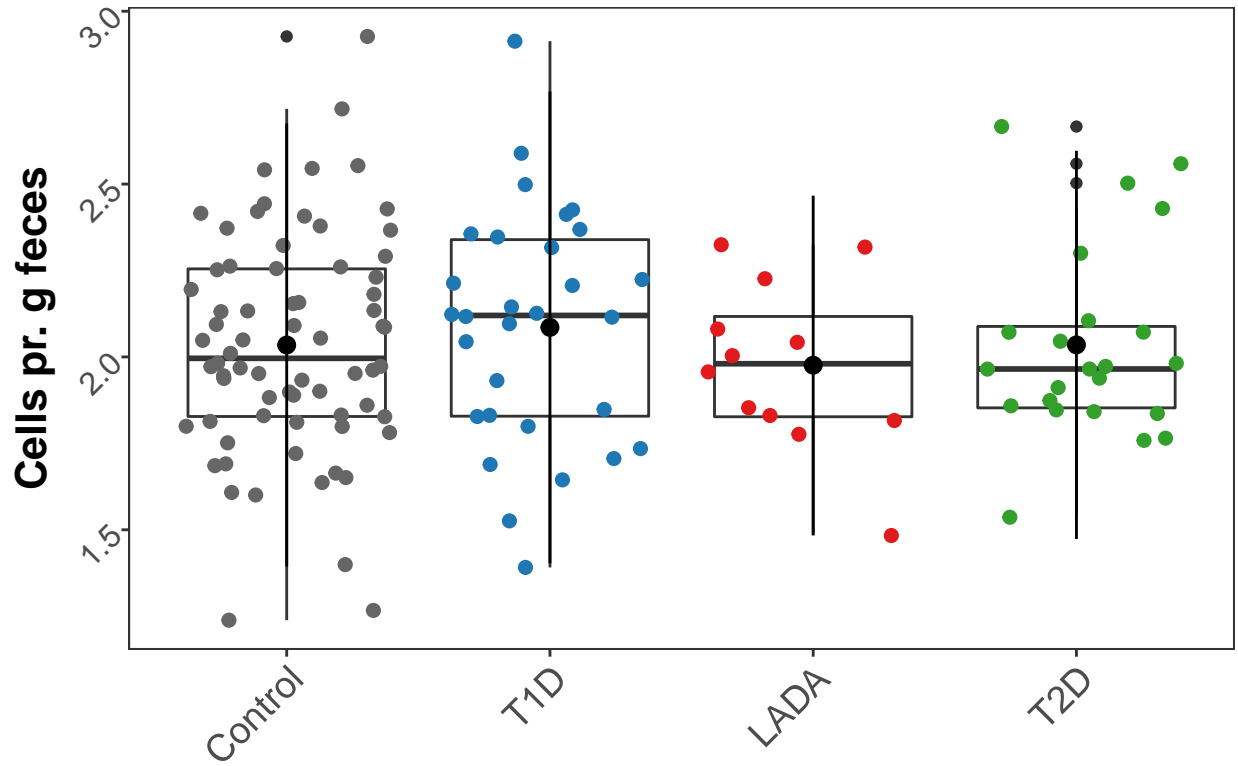

|      | pvalue    | padj      | Genus                        | compare         |
|------|-----------|-----------|------------------------------|-----------------|
| 437  | 0.0054656 | 0.0346055 | Mismatch_repair_PATH_ko03430 | LADA vs Control |
| 241  | 0.0108697 | 0.0629443 | Mismatch_repair_PATH_ko03430 | Control vs T2D  |
| 829  | 0.1780928 | 0.3554025 | Mismatch_repair_PATH_ko03430 | LADA vs T1D     |
| 45   | 0.0614876 | 0.3992571 | Mismatch_repair_PATH_ko03430 | Control vs T1D  |
| 633  | 0.4615725 | 0.6743371 | Mismatch_repair_PATH_ko03430 | T1D vs T2D      |
| 1025 | 0.4723578 | 0.8415375 | Mismatch_repair_PATH_ko03430 | LADA vs T2D     |

# Mismatch\_repair\_PATH\_ko03430

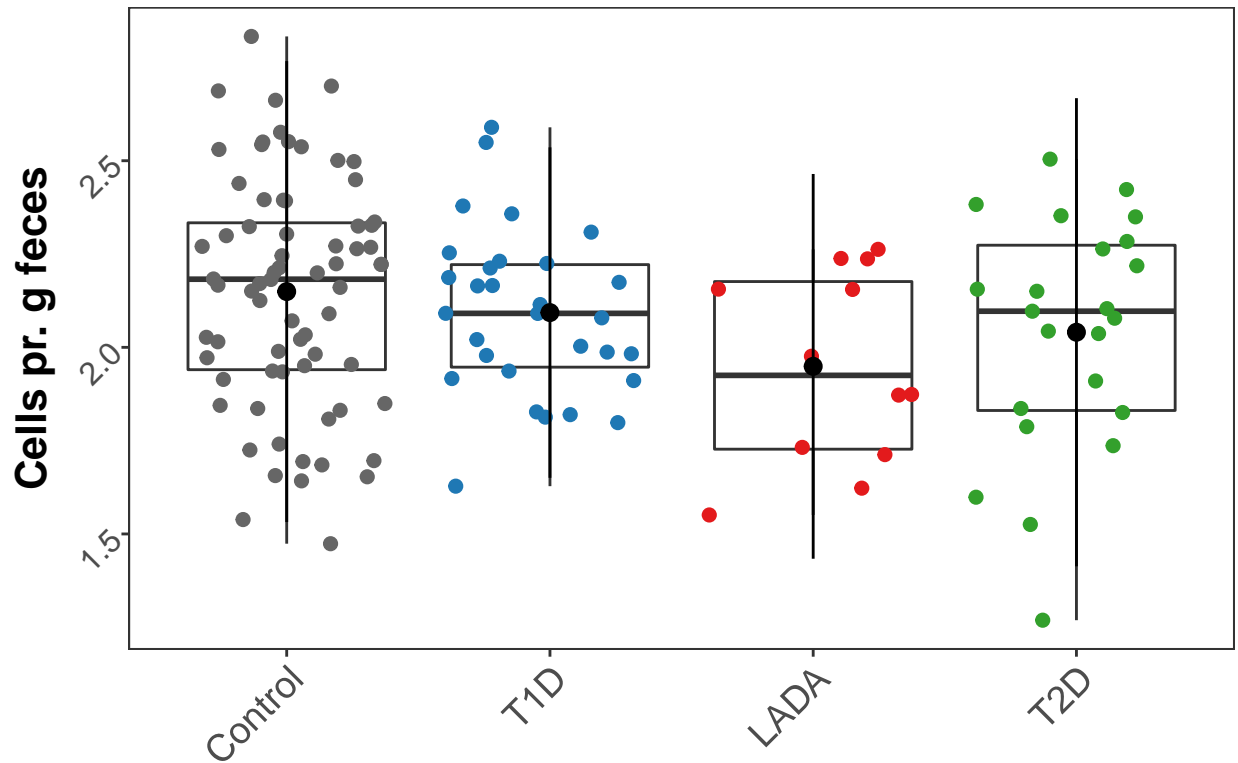

|      | pvalue    | padj      | Genus                                           | compare         |
|------|-----------|-----------|-------------------------------------------------|-----------------|
| 556  | 0.0057776 | 0.0346055 | Polyketide_sugar_unit_biosynthesis_PATH_ko00523 | LADA vs Control |
| 360  | 0.1222032 | 0.1708773 | Polyketide_sugar_unit_biosynthesis_PATH_ko00523 | Control vs T2D  |
| 948  | 0.0447616 | 0.2312928 | Polyketide_sugar_unit_biosynthesis_PATH_ko00523 | LADA vs T1D     |
| 164  | 0.4175665 | 0.5940928 | Polyketide_sugar_unit_biosynthesis_PATH_ko00523 | Control vs T1D  |
| 752  | 0.4826515 | 0.6743371 | Polyketide_sugar_unit_biosynthesis_PATH_ko00523 | T1D vs T2D      |
| 1144 | 0.1680312 | 0.8415375 | Polyketide_sugar_unit_biosynthesis_PATH_ko00523 | LADA vs T2D     |

# Polyketide\_sugar\_unit\_biosynthesis\_PA'

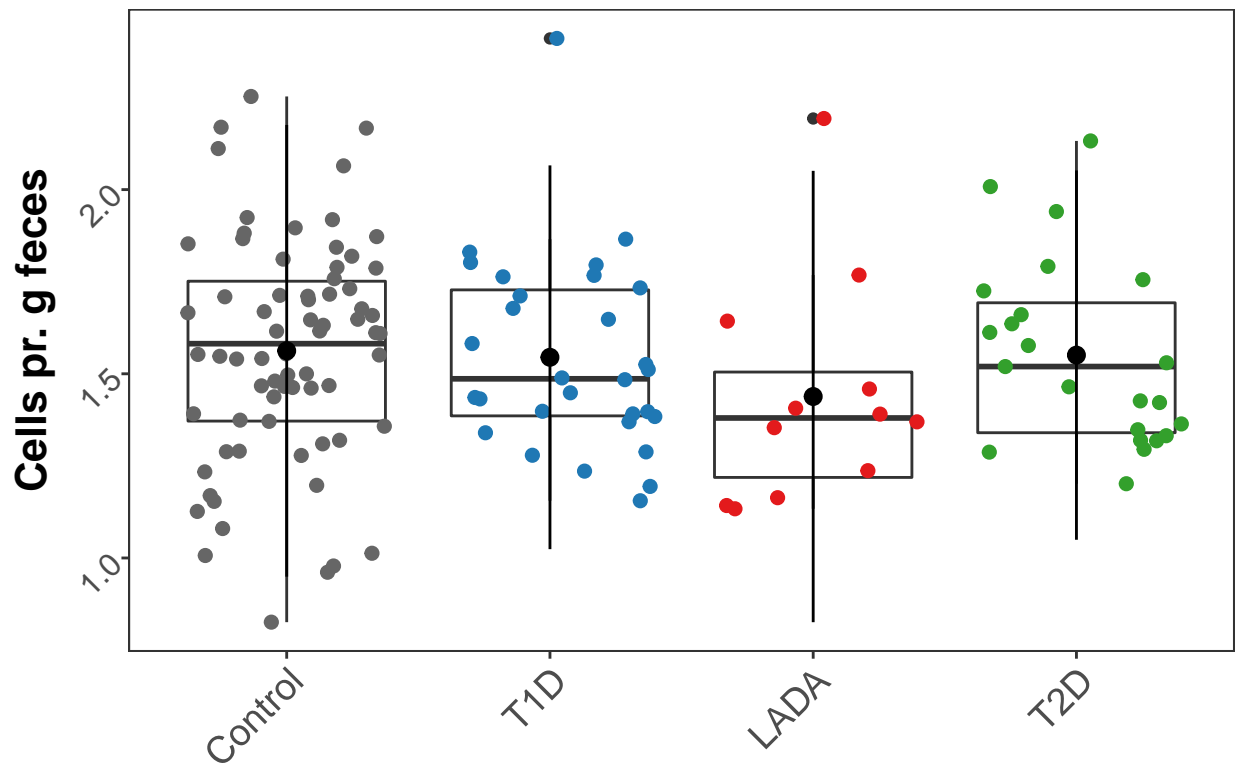

|      | pvalue    | padj      | Genus                                        | compare         |
|------|-----------|-----------|----------------------------------------------|-----------------|
| 588  | 0.0058607 | 0.0346055 | Microbial_metabolism_in_diverse_environments | LADA vs Control |
| 392  | 0.0296219 | 0.0676342 | Microbial_metabolism_in_diverse_environments | Control vs T2D  |
| 980  | 0.0260302 | 0.2312928 | Microbial_metabolism_in_diverse_environments | LADA vs T1D     |
| 784  | 0.1277677 | 0.6495082 | Microbial_metabolism_in_diverse_environments | T1D vs T2D      |
| 196  | 0.6445281 | 0.7564521 | Microbial_metabolism_in_diverse_environments | Control vs T1D  |
| 1176 | 0.3423220 | 0.8415375 | Microbial_metabolism_in_diverse_environments | LADA vs T2D     |

# Microbial\_metabolism\_in\_diverse\_enviro

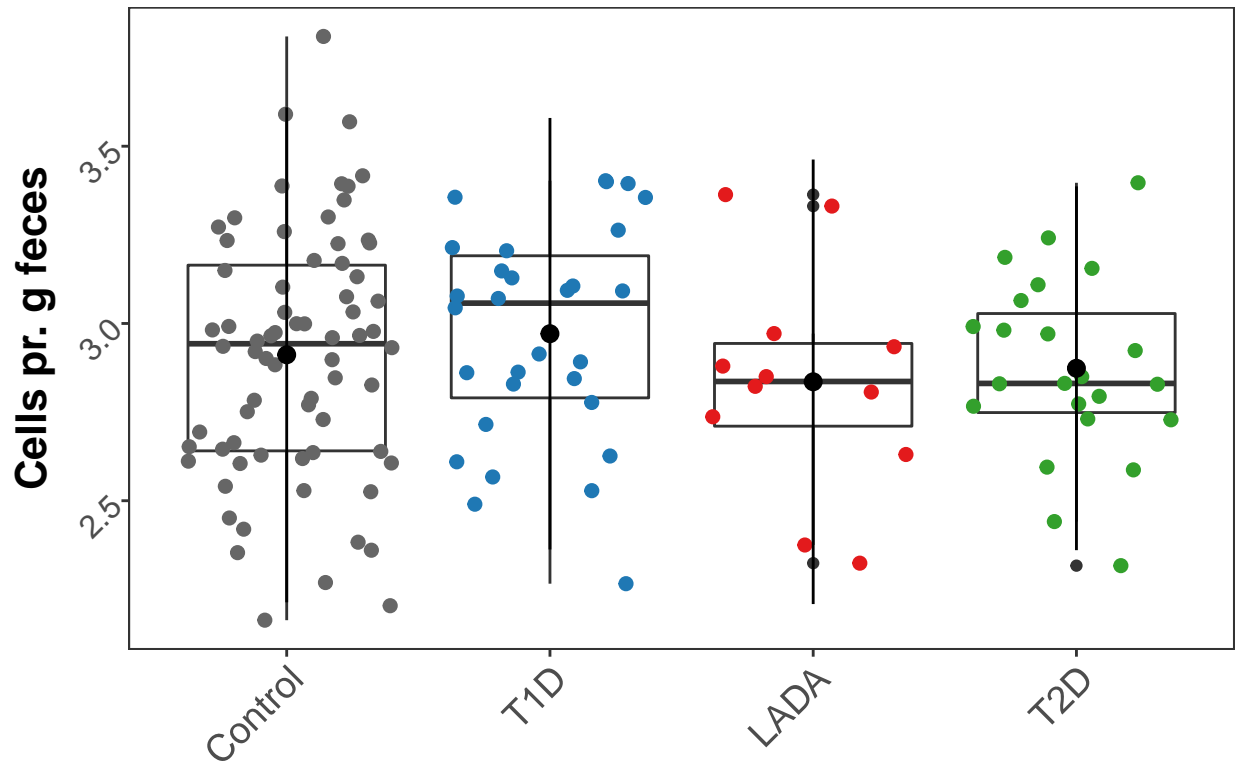

|     | pvalue    | padj      | Genus                    | compare         |
|-----|-----------|-----------|--------------------------|-----------------|
| 399 | 0.0059859 | 0.0346055 | Necroptosis_PATH_ko04217 | LADA vs Control |
| 203 | 0.0098607 | 0.0629443 | Necroptosis_PATH_ko04217 | Control vs T2D  |
| 791 | 0.1961349 | 0.3597318 | Necroptosis_PATH_ko04217 | LADA vs T1D     |
| 7   | 0.0558735 | 0.3992571 | Necroptosis_PATH_ko04217 | Control vs T1D  |
| 595 | 0.4638783 | 0.6743371 | Necroptosis_PATH_ko04217 | T1D vs T2D      |
| 987 | 0.5029915 | 0.8415375 | Necroptosis_PATH_ko04217 | LADA vs T2D     |

# Necroptosis\_PATH\_ko04217

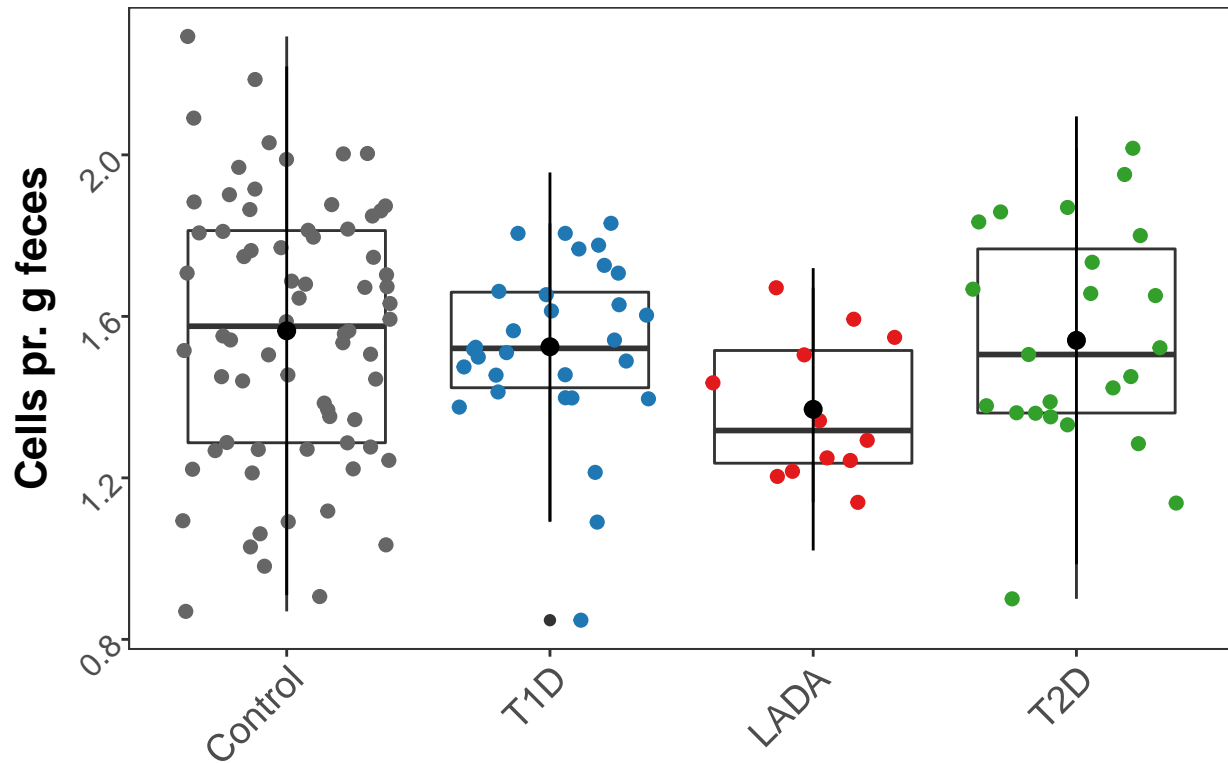

|      | pvalue    | padj      | Genus                                | compare         |
|------|-----------|-----------|--------------------------------------|-----------------|
| 468  | 0.0063136 | 0.0346055 | Monobactam_biosynthesis_PATH_ko00261 | LADA vs Control |
| 272  | 0.0124246 | 0.0629443 | Monobactam_biosynthesis_PATH_ko00261 | Control vs T2D  |
| 860  | 0.1212508 | 0.2744316 | Monobactam_biosynthesis_PATH_ko00261 | LADA vs T1D     |
| 76   | 0.1375919 | 0.4612224 | Monobactam_biosynthesis_PATH_ko00261 | Control vs T1D  |
| 664  | 0.3179150 | 0.6495082 | Monobactam_biosynthesis_PATH_ko00261 | T1D vs T2D      |
| 1056 | 0.4783453 | 0.8415375 | Monobactam_biosynthesis_PATH_ko00261 | LADA vs T2D     |

# Monobactam\_biosynthesis\_PATH\_ko002

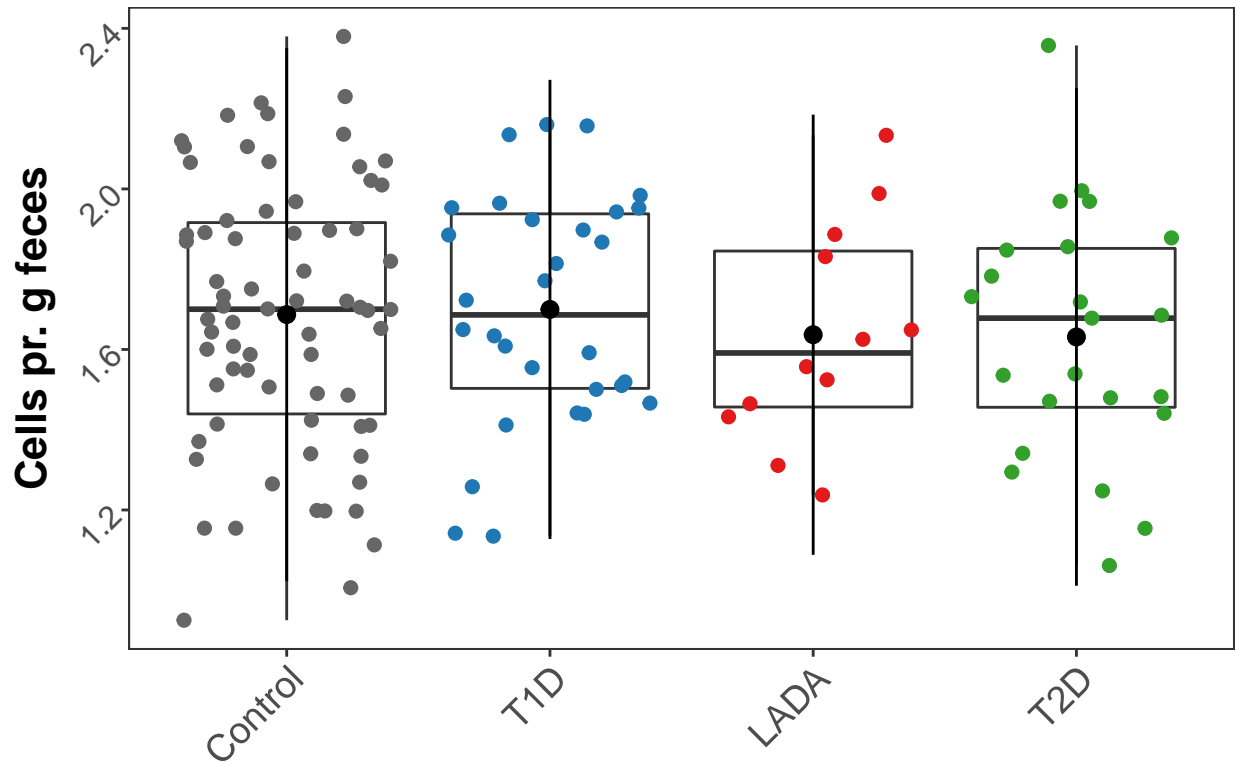

|      | pvalue    | padj      | Genus                                   | compare         |
|------|-----------|-----------|-----------------------------------------|-----------------|
| 510  | 0.0067198 | 0.0346055 | Peptidoglycan_biosynthesis_PATH_ko00550 | LADA vs Control |
| 314  | 0.0049509 | 0.0629443 | Peptidoglycan_biosynthesis_PATH_ko00550 | Control vs T2D  |
| 902  | 0.1480007 | 0.3094575 | Peptidoglycan_biosynthesis_PATH_ko00550 | LADA vs T1D     |
| 118  | 0.1060094 | 0.4612224 | Peptidoglycan_biosynthesis_PATH_ko00550 | Control vs T1D  |
| 706  | 0.2443036 | 0.6495082 | Peptidoglycan_biosynthesis_PATH_ko00550 | T1D vs T2D      |
| 1098 | 0.6302230 | 0.8841442 | Peptidoglycan_biosynthesis_PATH_ko00550 | LADA vs T2D     |

# Peptidoglycan\_biosynthesis\_PATH\_ko000

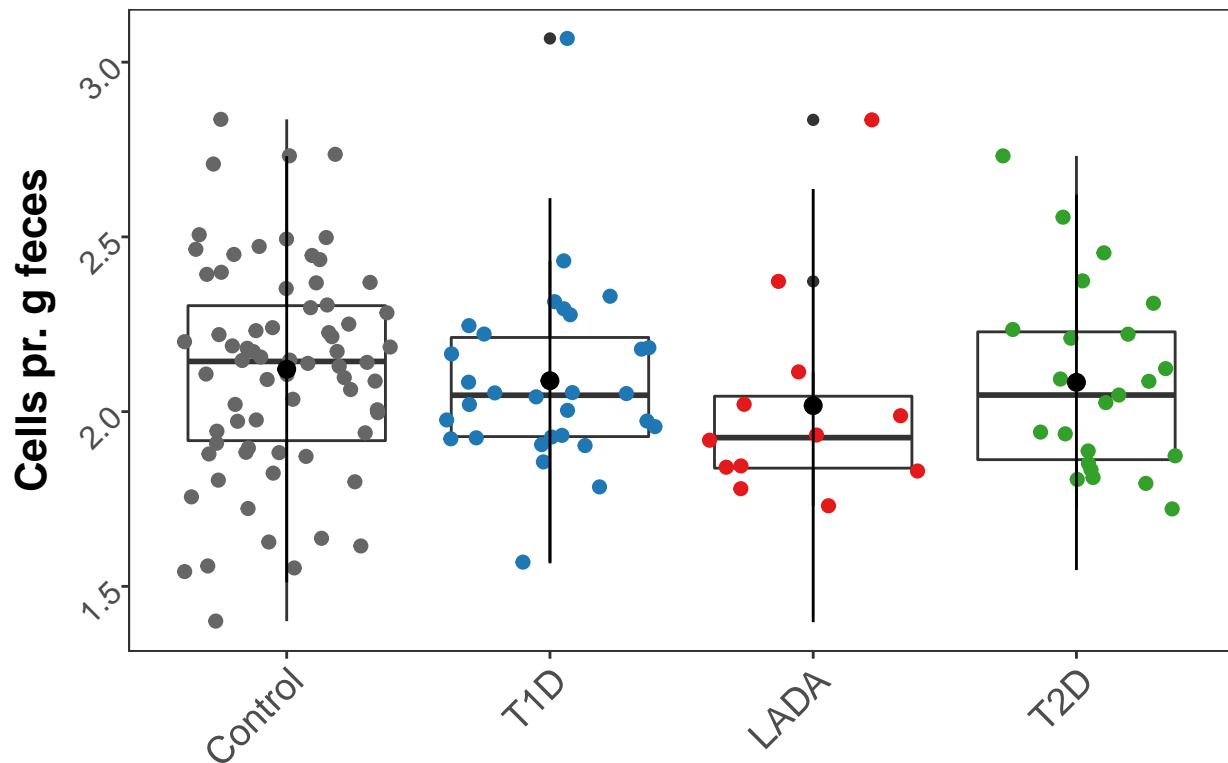

|      | pvalue    | padj      | Genus                             | compare         |
|------|-----------|-----------|-----------------------------------|-----------------|
| 452  | 0.0067429 | 0.0346055 | Histidine_metabolism_PATH_ko00340 | LADA vs Control |
| 256  | 0.0257700 | 0.0676342 | Histidine_metabolism_PATH_ko00340 | Control vs T2D  |
| 844  | 0.0600206 | 0.2312928 | Histidine_metabolism_PATH_ko00340 | LADA vs T1D     |
| 60   | 0.3495677 | 0.5414362 | Histidine_metabolism_PATH_ko00340 | Control vs T1D  |
| 648  | 0.2312996 | 0.6495082 | Histidine_metabolism_PATH_ko00340 | T1D vs T2D      |
| 1040 | 0.3830784 | 0.8415375 | Histidine_metabolism_PATH_ko00340 | LADA vs T2D     |

# Histidine\_metabolism\_PATH\_ko00340

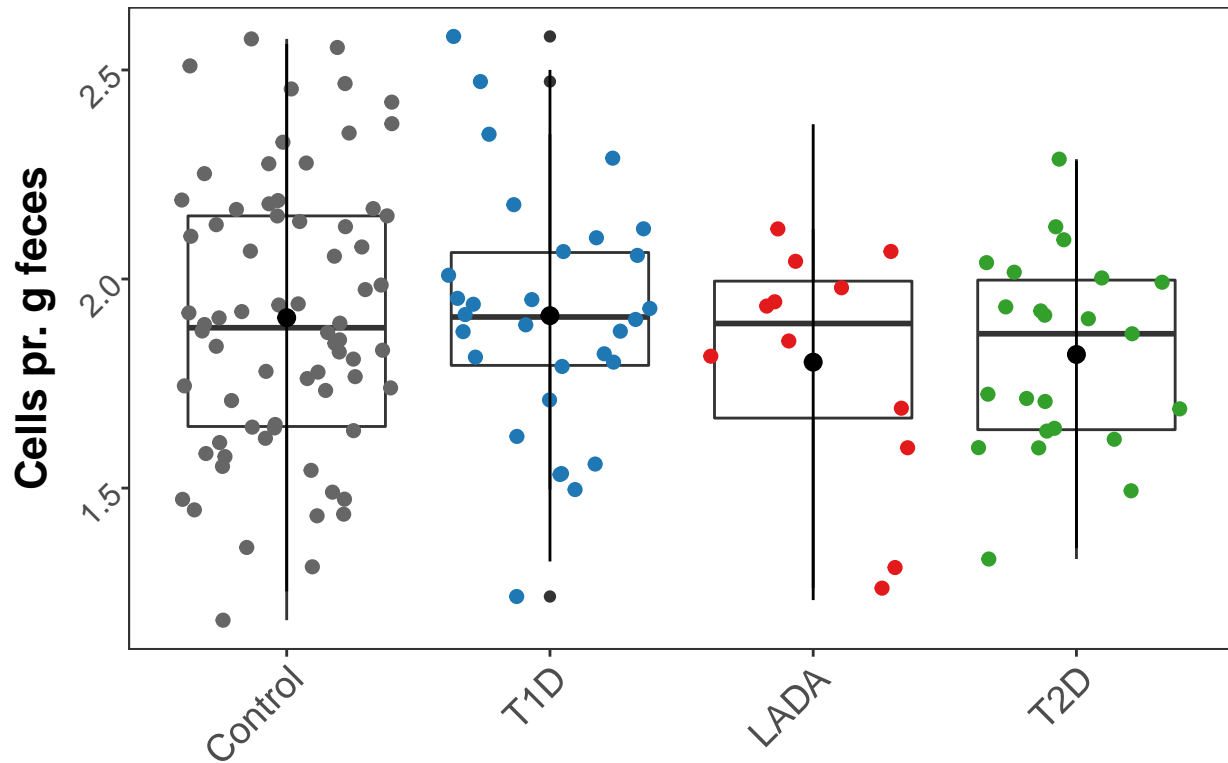

|      | pvalue    | padj      | Genus                          | compare         |
|------|-----------|-----------|--------------------------------|-----------------|
| 560  | 0.0071435 | 0.0346055 | Purine_metabolism_PATH_ko00230 | LADA vs Control |
| 364  | 0.0268585 | 0.0676342 | Purine_metabolism_PATH_ko00230 | Control vs T2D  |
| 952  | 0.0621940 | 0.2312928 | Purine_metabolism_PATH_ko00230 | LADA vs T1D     |
| 168  | 0.3510477 | 0.5414362 | Purine_metabolism_PATH_ko00230 | Control vs T1D  |
| 756  | 0.2358902 | 0.6495082 | Purine_metabolism_PATH_ko00230 | T1D vs T2D      |
| 1148 | 0.3863526 | 0.8415375 | Purine_metabolism_PATH_ko00230 | LADA vs T2D     |



# Purine\_metabolism\_PATH\_ko00230

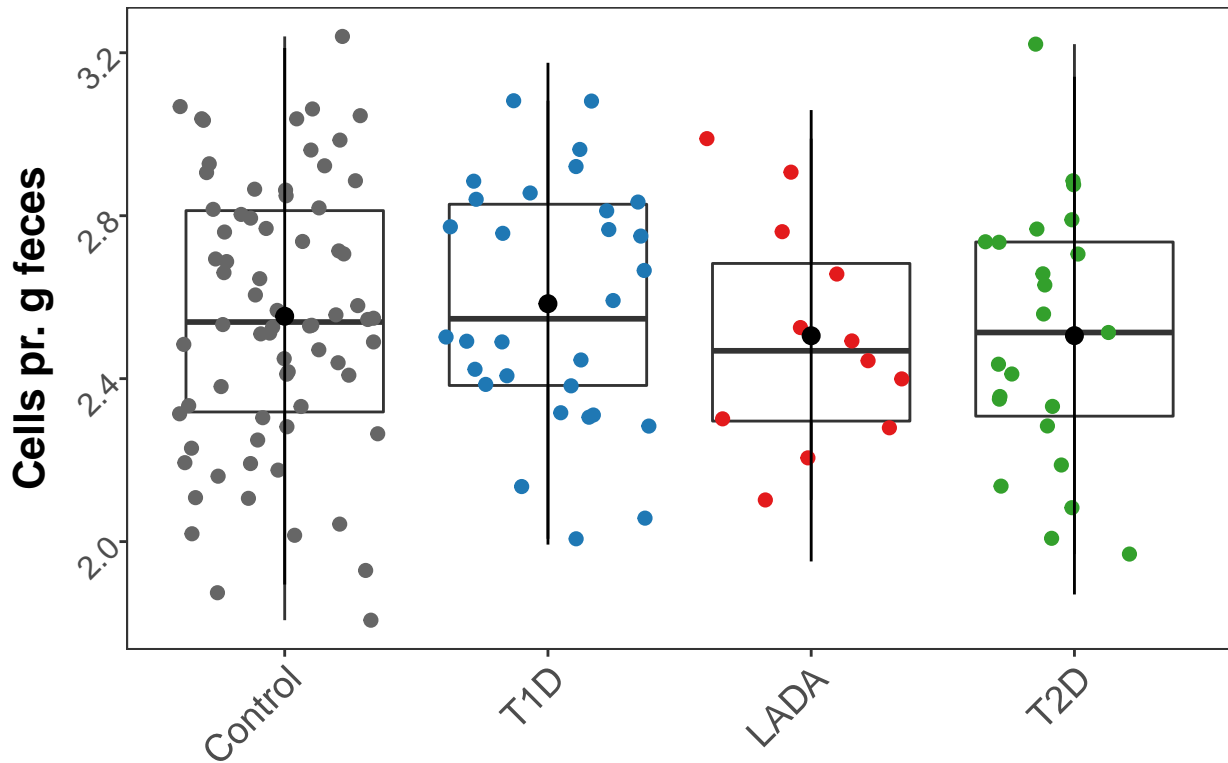

|      | pvalue    | padj      | Genus                                                | compare            |
|------|-----------|-----------|------------------------------------------------------|--------------------|
| 451  | 0.0072330 | 0.0346055 | Glycine_serine_and_threonine_metabolism_PATH_ko00230 | Control vs Control |
| 255  | 0.0360466 | 0.0725327 | Glycine_serine_and_threonine_metabolism_PATH_ko00230 | Control vs T2D     |
| 843  | 0.0919352 | 0.2458003 | Glycine_serine_and_threonine_metabolism_PATH_ko00230 | Control vs T1D     |
| 59   | 0.2271314 | 0.4786856 | Glycine_serine_and_threonine_metabolism_PATH_ko00230 | Control vs T1D     |
| 647  | 0.3859337 | 0.6495082 | Glycine_serine_and_threonine_metabolism_PATH_ko00230 | Control vs T2D     |
| 1039 | 0.3463547 | 0.8415375 | Glycine_serine_and_threonine_metabolism_PATH_ko00230 | Control vs T2D     |

# Glycine\_serine\_and\_threonine\_metabo

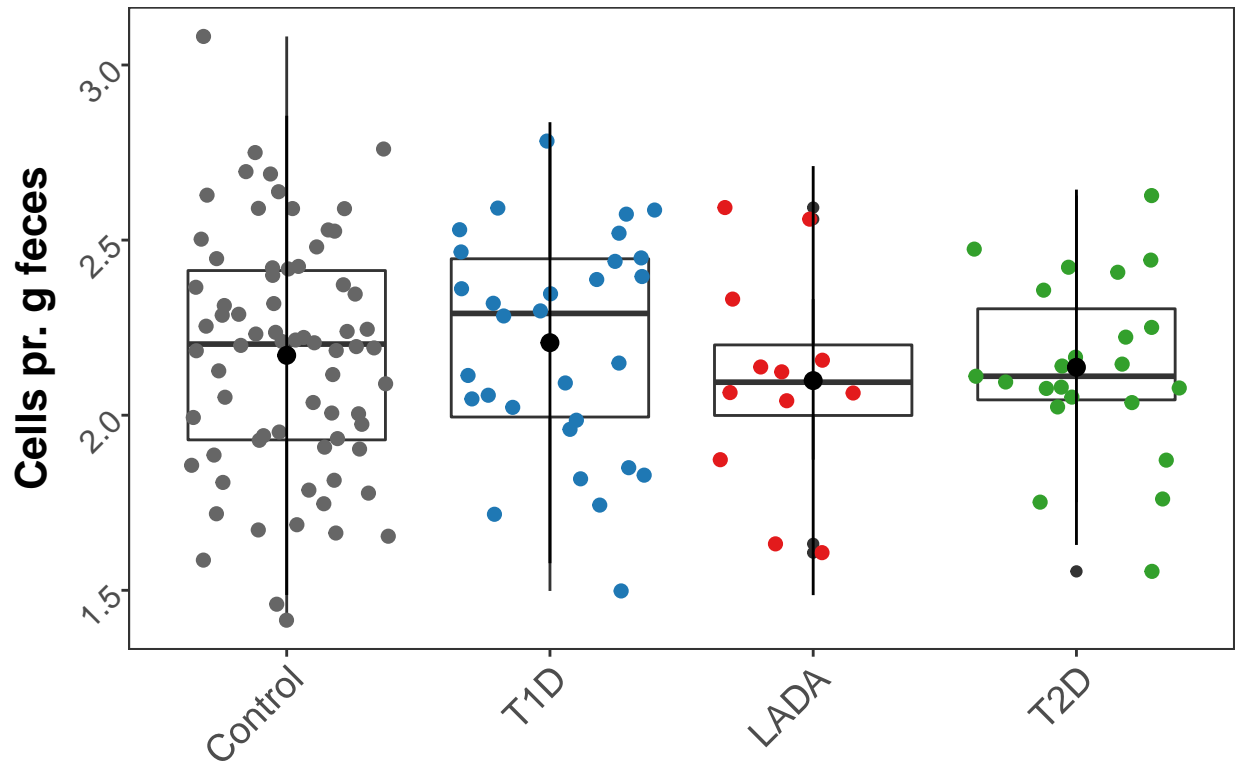

|      | pvalue    | padj      | Genus                       | compare         |
|------|-----------|-----------|-----------------------------|-----------------|
| 429  | 0.0073488 | 0.0346055 | Protein_export_PATH_ko03060 | LADA vs Control |
| 233  | 0.0125229 | 0.0629443 | Protein_export_PATH_ko03060 | Control vs T2D  |
| 821  | 0.0990909 | 0.2458003 | Protein_export_PATH_ko03060 | LADA vs T1D     |
| 37   | 0.2089255 | 0.4786856 | Protein_export_PATH_ko03060 | Control vs T1D  |
| 625  | 0.2395623 | 0.6495082 | Protein_export_PATH_ko03060 | T1D vs T2D      |
| 1017 | 0.5050186 | 0.8415375 | Protein_export_PATH_ko03060 | LADA vs T2D     |

# Protein\_export\_PATH\_ko03060

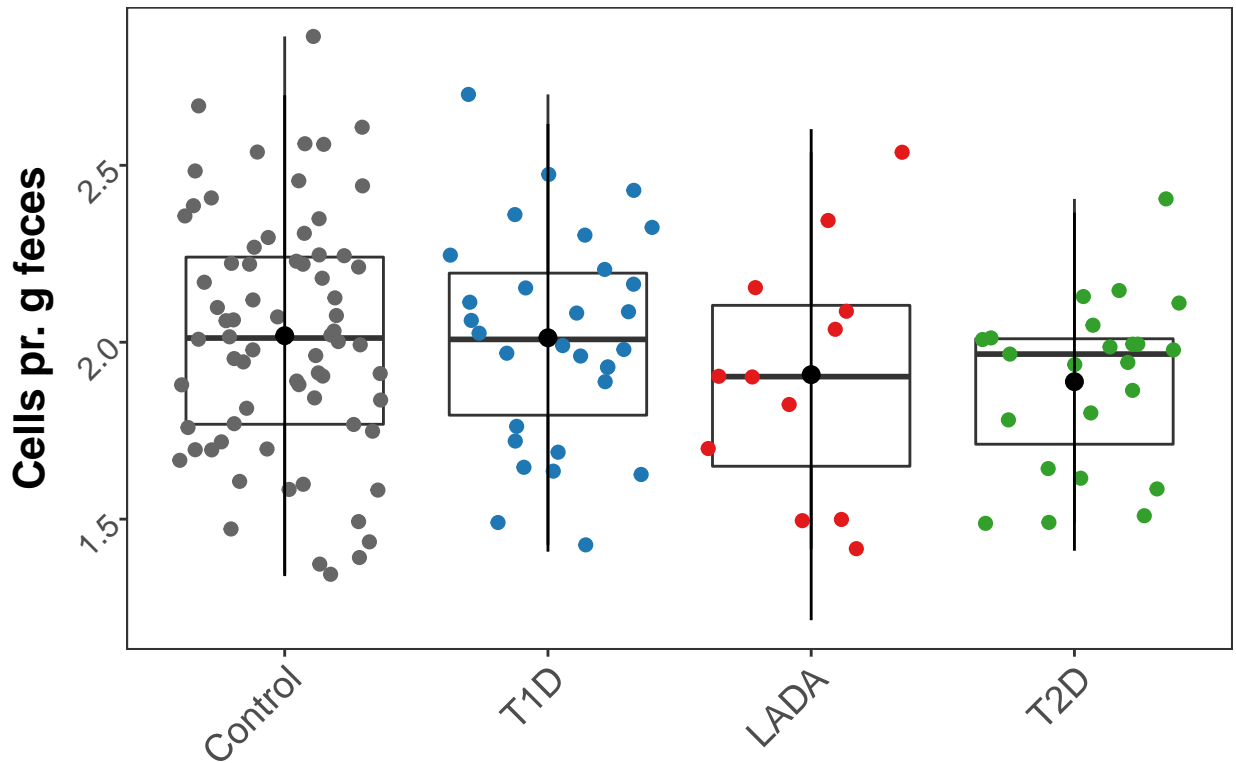

|      | pvalue    | padj      | Genus                                                   | compare |
|------|-----------|-----------|---------------------------------------------------------|---------|
| 447  | 0.0074117 | 0.0346055 | Alanine__aspartate_and_glutamate_metabolism_PATHL500250 | Control |
| 251  | 0.0357249 | 0.0725327 | Alanine__aspartate_and_glutamate_metabolism_PATHC00250  | T2D     |
| 839  | 0.0982838 | 0.2458003 | Alanine__aspartate_and_glutamate_metabolism_PATHL500250 | T1D     |
| 55   | 0.2126734 | 0.4786856 | Alanine__aspartate_and_glutamate_metabolism_PATHC00250  | T1D     |
| 643  | 0.4009719 | 0.6495082 | Alanine__aspartate_and_glutamate_metabolism_PATHL500250 | T2D     |
| 1035 | 0.3513056 | 0.8415375 | Alanine__aspartate_and_glutamate_metabolism_PATHL500250 | T2D     |

# Alanine\_\_aspartate\_and\_glutamate\_met

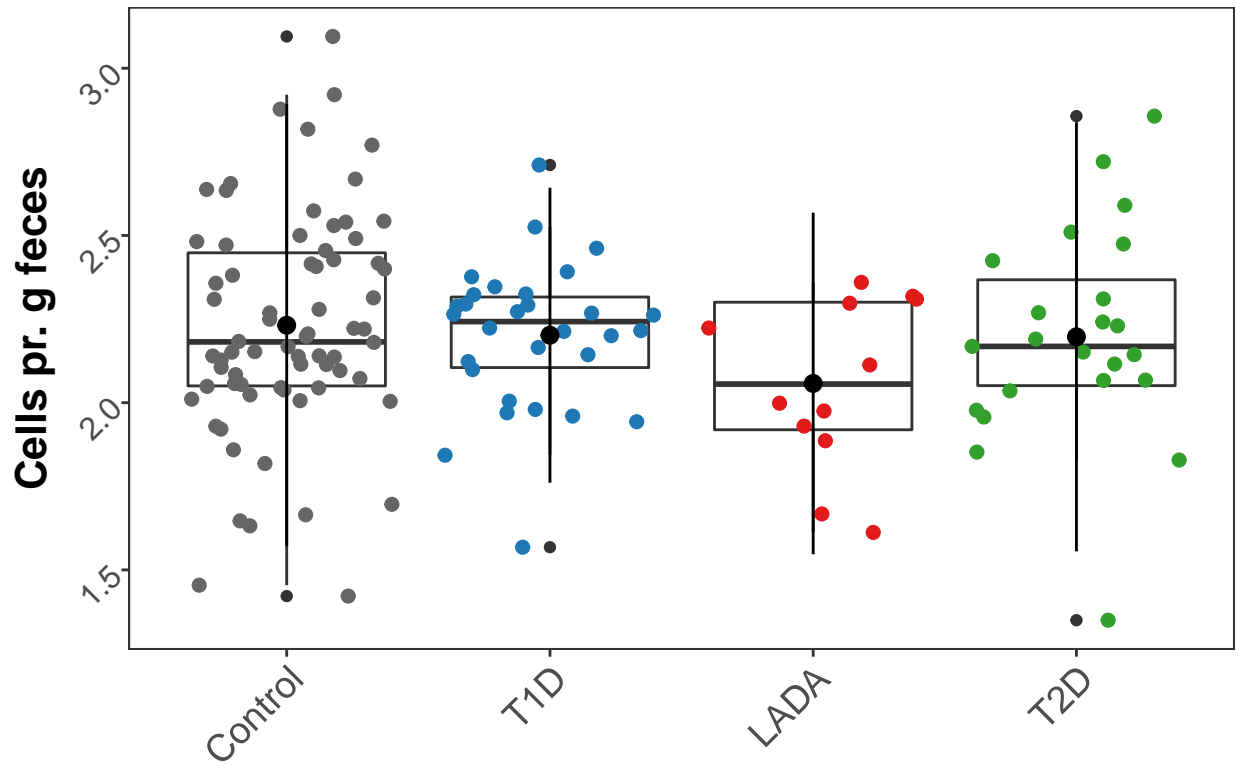

|      | pvalue    | padj      | Genus              | compare         |
|------|-----------|-----------|--------------------|-----------------|
| 587  | 0.0078966 | 0.0346055 | Metabolic_pathways | LADA vs Control |
| 391  | 0.0208497 | 0.0661577 | Metabolic_pathways | Control vs T2D  |
| 979  | 0.0805437 | 0.2321553 | Metabolic_pathways | LADA vs T1D     |
| 195  | 0.2854587 | 0.5040976 | Metabolic_pathways | Control vs T1D  |
| 783  | 0.2449106 | 0.6495082 | Metabolic_pathways | T1D vs T2D      |
| 1175 | 0.4405875 | 0.8415375 | Metabolic_pathways | LADA vs T2D     |

# Metabolic\_pathways

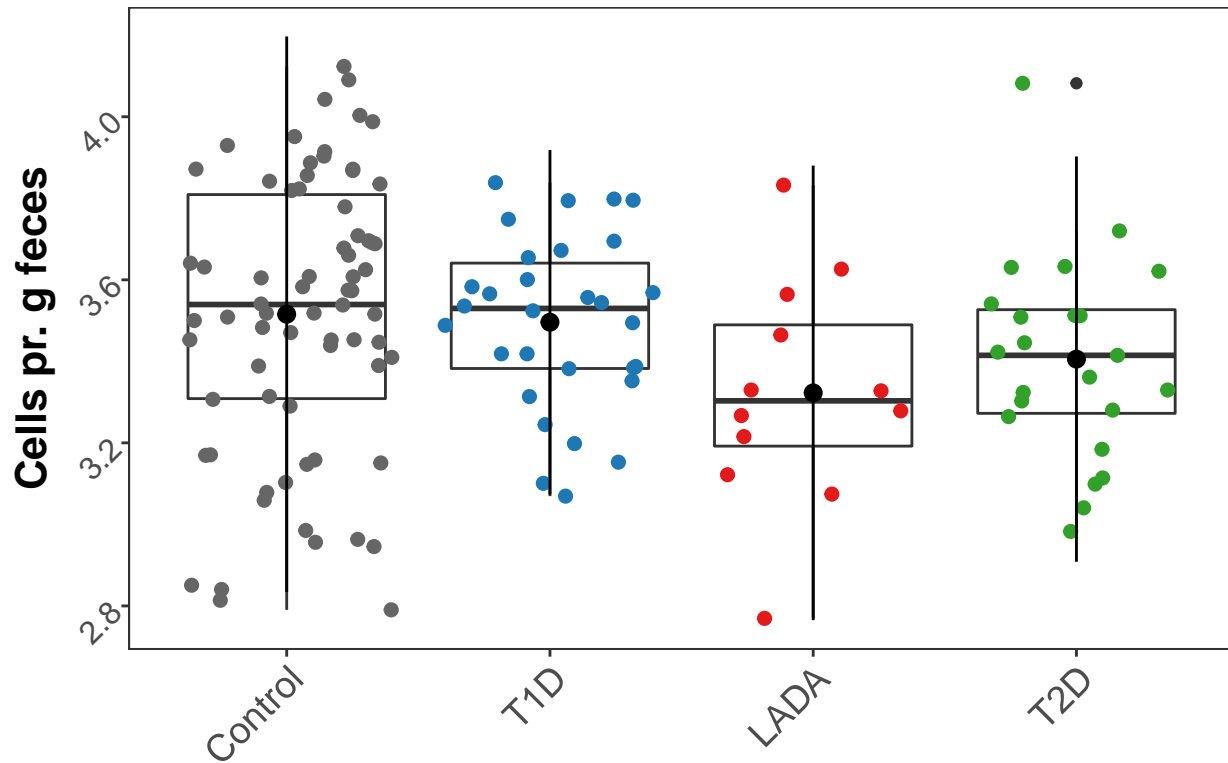

|      | pvalue    | padj      | Genus                              | compare         |
|------|-----------|-----------|------------------------------------|-----------------|
| 561  | 0.0081670 | 0.0346055 | Pyrimidine_metabolism_PATH_ko00240 | LADA vs Control |
| 365  | 0.0276553 | 0.0676342 | Pyrimidine_metabolism_PATH_ko00240 | Control vs T2D  |
| 953  | 0.0461198 | 0.2312928 | Pyrimidine_metabolism_PATH_ko00240 | LADA vs T1D     |
| 757  | 0.1658723 | 0.6495082 | Pyrimidine_metabolism_PATH_ko00240 | T1D vs T2D      |
| 169  | 0.5056515 | 0.6651524 | Pyrimidine_metabolism_PATH_ko00240 | Control vs T1D  |
| 1149 | 0.4040054 | 0.8415375 | Pyrimidine_metabolism_PATH_ko00240 | LADA vs T2D     |

# Pyrimidine\_metabolism\_PATH\_ko00240

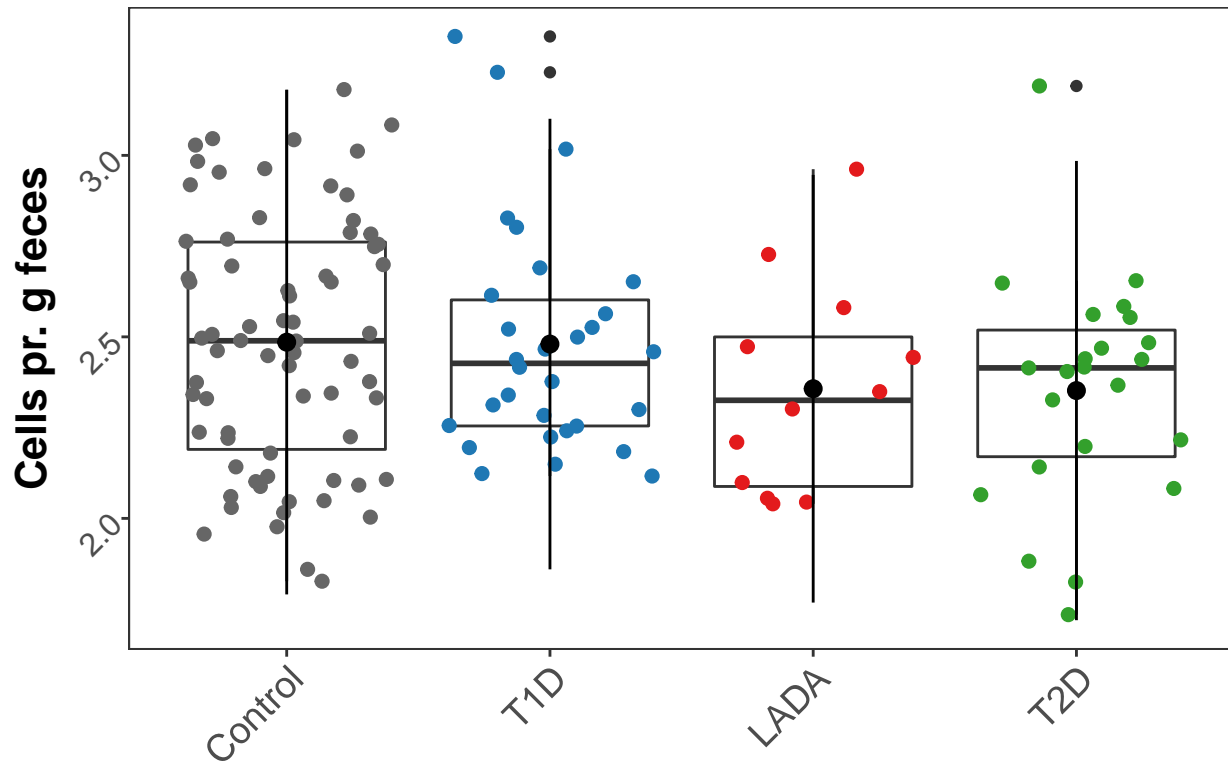

|      | pvalue    | padj      | Genus                                | compare         |
|------|-----------|-----------|--------------------------------------|-----------------|
| 470  | 0.0084018 | 0.0346055 | Novobiocin_biosynthesis_PATH_ko00401 | LADA vs Control |
| 274  | 0.0346820 | 0.0724371 | Novobiocin_biosynthesis_PATH_ko00401 | Control vs T2D  |
| 862  | 0.0877216 | 0.2443633 | Novobiocin_biosynthesis_PATH_ko00401 | LADA vs T1D     |
| 78   | 0.2710234 | 0.4873448 | Novobiocin_biosynthesis_PATH_ko00401 | Control vs T1D  |
| 666  | 0.3345997 | 0.6495082 | Novobiocin_biosynthesis_PATH_ko00401 | T1D vs T2D      |
| 1058 | 0.3751514 | 0.8415375 | Novobiocin_biosynthesis_PATH_ko00401 | LADA vs T2D     |

# Novobiocin\_biosynthesis\_PATH\_ko0040

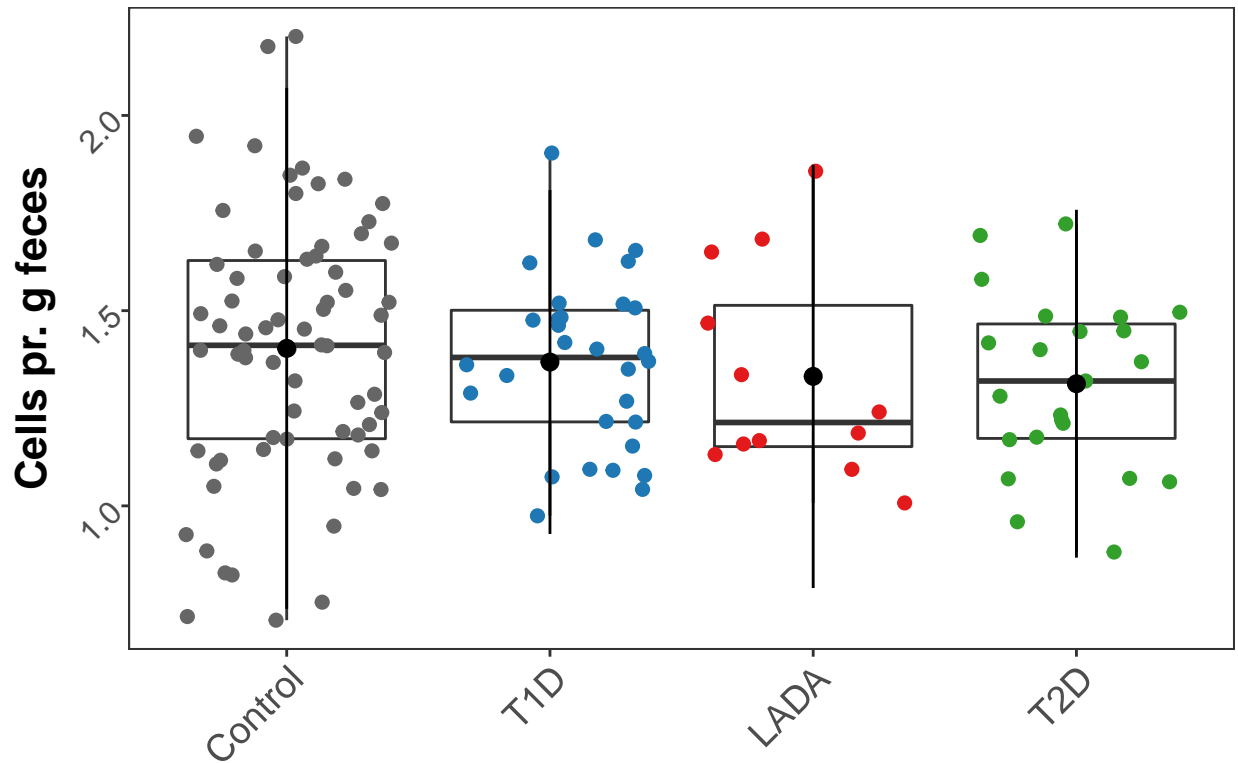

|      | pvalue    | padj      | Genus                 | compare         |
|------|-----------|-----------|-----------------------|-----------------|
| 444  | 0.0084422 | 0.0346055 | Ribosome_PATH_ko03010 | LADA vs Control |
| 248  | 0.0589387 | 0.0981236 | Ribosome_PATH_ko03010 | Control vs T2D  |
| 836  | 0.0350523 | 0.2312928 | Ribosome_PATH_ko03010 | LADA vs T1D     |
| 640  | 0.2054318 | 0.6495082 | Ribosome_PATH_ko03010 | T1D vs T2D      |
| 52   | 0.6369647 | 0.7537556 | Ribosome_PATH_ko03010 | Control vs T1D  |
| 1032 | 0.3001035 | 0.8415375 | Ribosome_PATH_ko03010 | LADA vs T2D     |

# Ribosome\_PATH\_ko03010

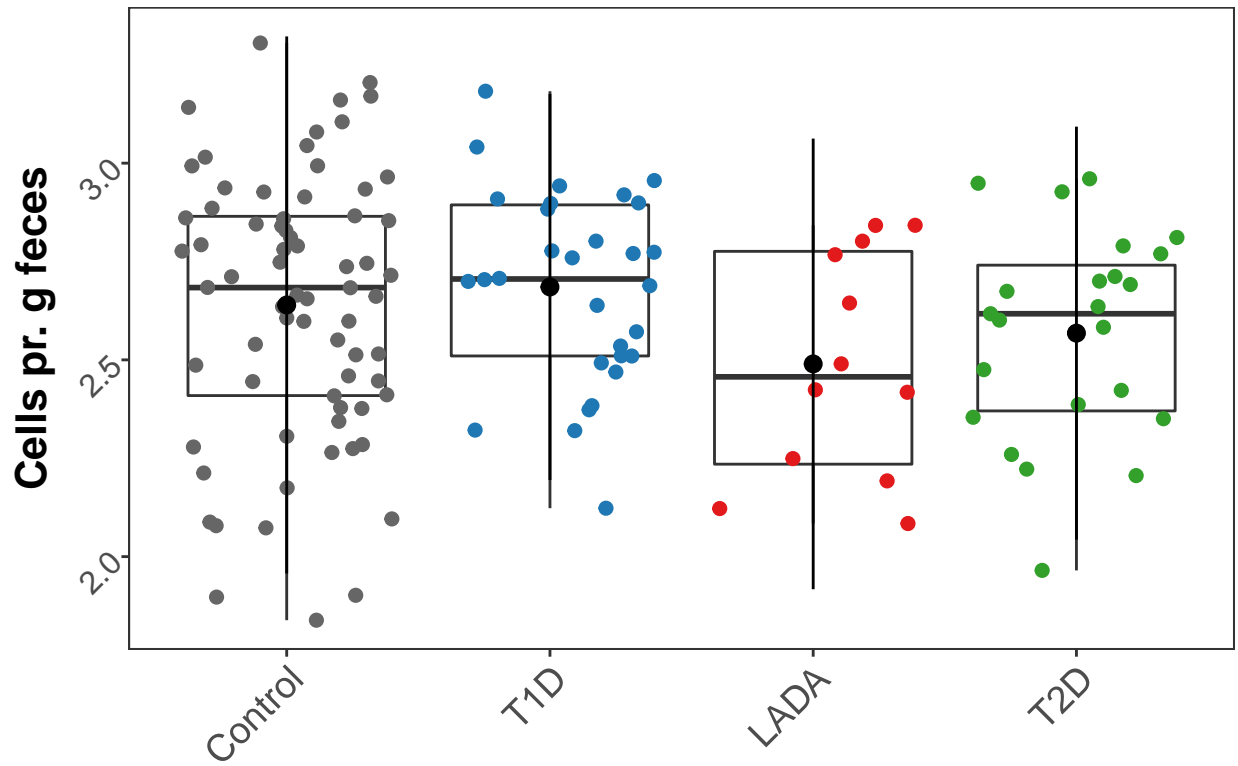

|      | pvalue    | padj      | Genus                                               | compare         |
|------|-----------|-----------|-----------------------------------------------------|-----------------|
| 543  | 0.0085715 | 0.0346055 | D_Glutamine_and_D_glutamate_metabolism_PATH_ko03010 | LADA vs Control |
| 347  | 0.0383866 | 0.0763108 | D_Glutamine_and_D_glutamate_metabolism_PATH_ko03010 | Control vs T2D  |
| 935  | 0.0689628 | 0.2312928 | D_Glutamine_and_D_glutamate_metabolism_PATH_ko03010 | LADA vs T1D     |
| 151  | 0.3591158 | 0.5414362 | D_Glutamine_and_D_glutamate_metabolism_PATH_ko03010 | Control vs T1D  |
| 739  | 0.2829842 | 0.6495082 | D_Glutamine_and_D_glutamate_metabolism_PATH_ko03010 | T1D vs T2D      |
| 1131 | 0.3634483 | 0.8415375 | D_Glutamine_and_D_glutamate_metabolism_PATH_ko03010 | LADA vs T2D     |



## D\_Glutamine\_and\_D\_glutamate\_metabo

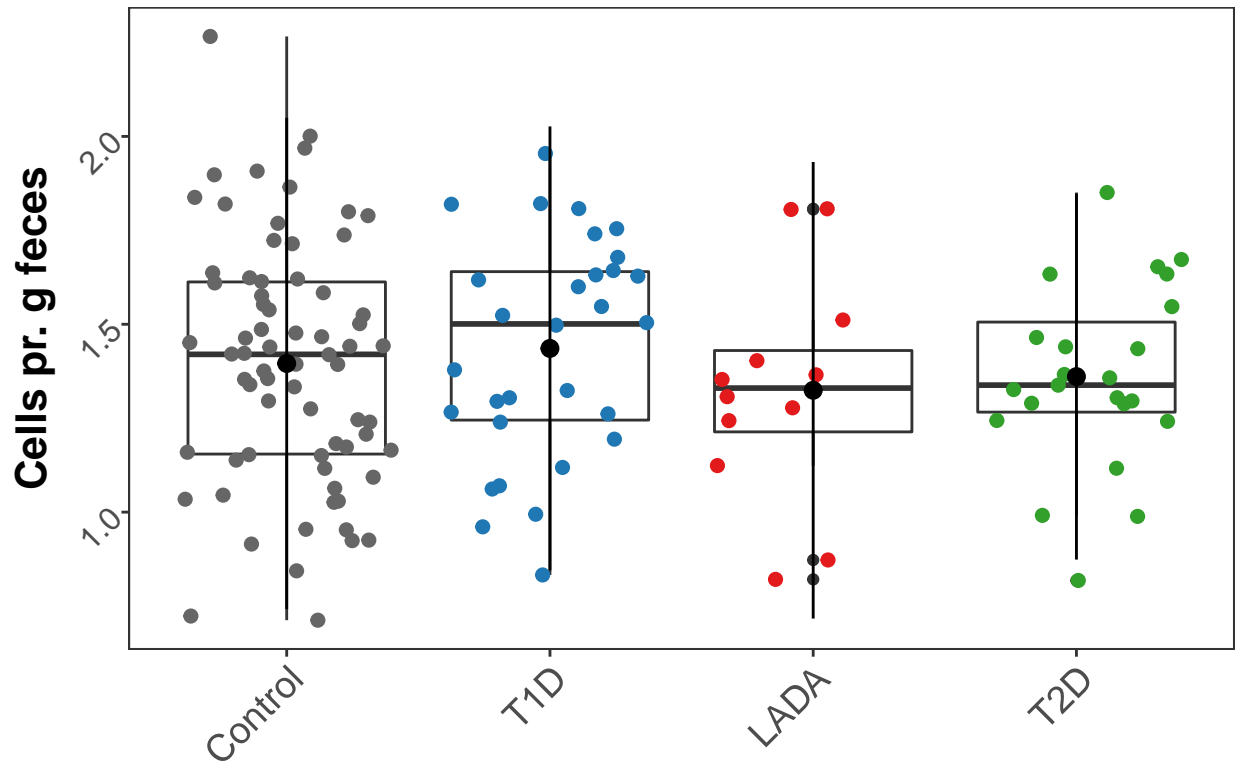

|      | pvalue    | padj      | Genus                                   | compare         |
|------|-----------|-----------|-----------------------------------------|-----------------|
| 484  | 0.0085968 | 0.0346055 | Glycolysis_Gluconeogenesis_PATH_ko00010 | LADA vs Control |
| 288  | 0.0093897 | 0.0629443 | Glycolysis_Gluconeogenesis_PATH_ko00010 | Control vs T2D  |
| 876  | 0.0696239 | 0.2312928 | Glycolysis_Gluconeogenesis_PATH_ko00010 | LADA vs T1D     |
| 92   | 0.3563381 | 0.5414362 | Glycolysis_Gluconeogenesis_PATH_ko00010 | Control vs T1D  |
| 680  | 0.1269311 | 0.6495082 | Glycolysis_Gluconeogenesis_PATH_ko00010 | T1D vs T2D      |
| 1072 | 0.5806969 | 0.8682081 | Glycolysis_Gluconeogenesis_PATH_ko00010 | LADA vs T2D     |

# Glycolysis\_\_Gluconeogenesis\_PATH\_k

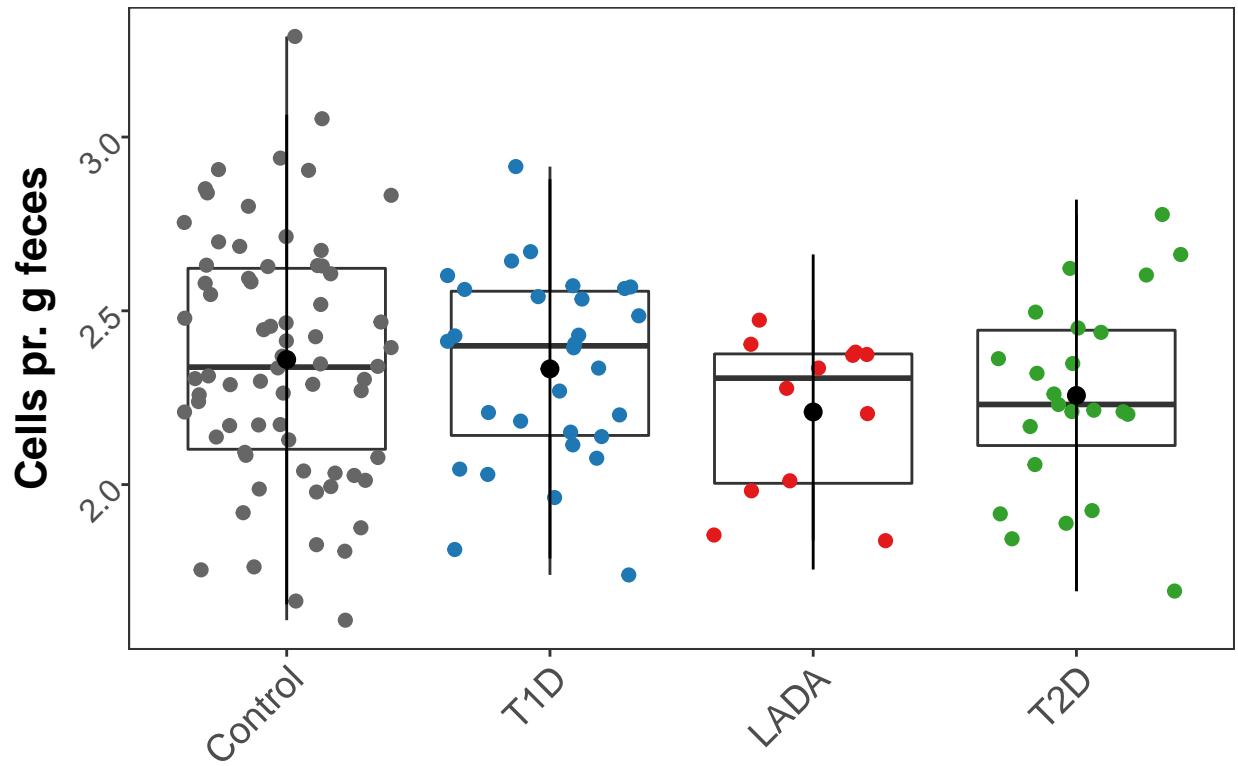

|     | pvalue    | padj      | Genus                       | compare         |
|-----|-----------|-----------|-----------------------------|-----------------|
| 406 | 0.0086998 | 0.0346055 | Quorum_sensing_PATH_ko02024 | LADA vs Control |
| 210 | 0.0339407 | 0.0717977 | Quorum_sensing_PATH_ko02024 | Control vs T2D  |
| 798 | 0.2318049 | 0.3940555 | Quorum_sensing_PATH_ko02024 | LADA vs T1D     |
| 14  | 0.0594483 | 0.3992571 | Quorum_sensing_PATH_ko02024 | Control vs T1D  |
| 602 | 0.7225598 | 0.8046688 | Quorum_sensing_PATH_ko02024 | T1D vs T2D      |
| 994 | 0.3839847 | 0.8415375 | Quorum_sensing_PATH_ko02024 | LADA vs T2D     |

# Quorum\_sensing\_PATH\_ko02024

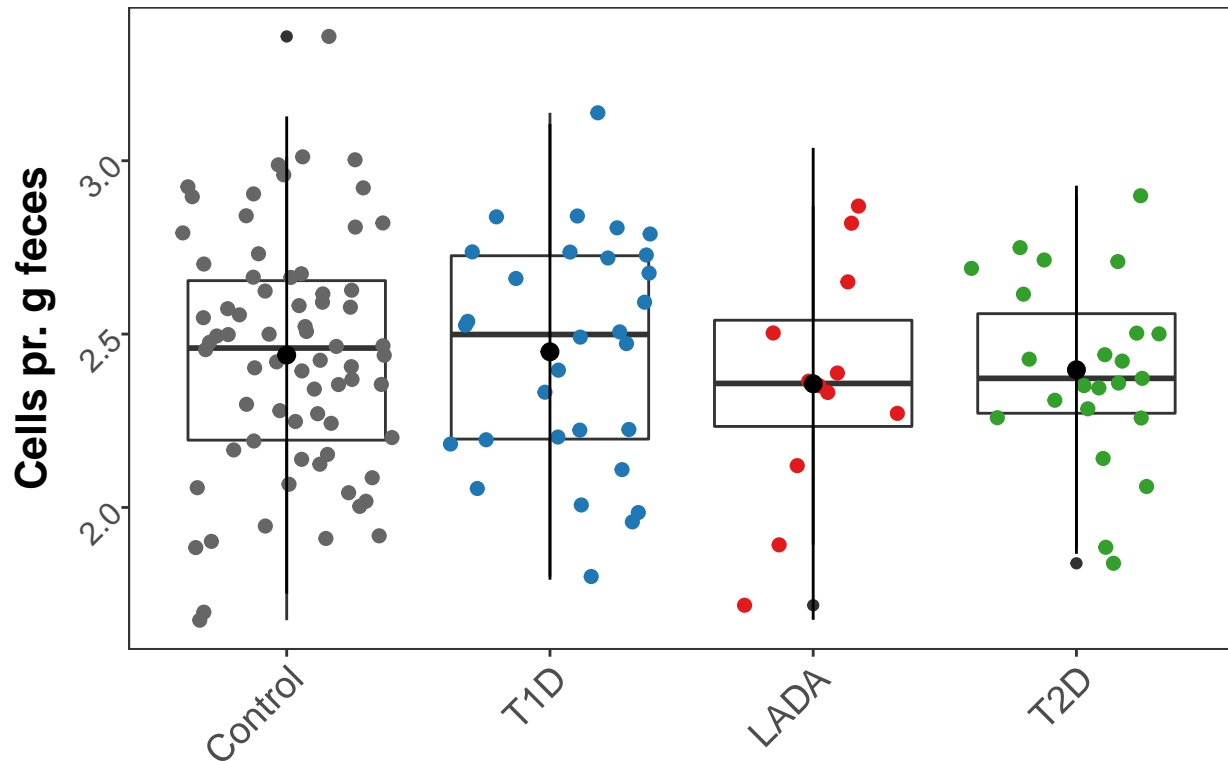

|      | pvalue    | padj      | Genus                                   | compare         |
|------|-----------|-----------|-----------------------------------------|-----------------|
| 548  | 0.0092733 | 0.0346055 | Biosynthesis_of_ansamycins_PATH_ko01051 | LADA vs Control |
| 352  | 0.0058911 | 0.0629443 | Biosynthesis_of_ansamycins_PATH_ko01051 | Control vs T2D  |
| 156  | 0.0051576 | 0.1684814 | Biosynthesis_of_ansamycins_PATH_ko01051 | Control vs T1D  |
| 940  | 0.5531848 | 0.6765319 | Biosynthesis_of_ansamycins_PATH_ko01051 | LADA vs T1D     |
| 744  | 0.8526337 | 0.8876857 | Biosynthesis_of_ansamycins_PATH_ko01051 | T1D vs T2D      |
| 1136 | 0.6714134 | 0.8952178 | Biosynthesis_of_ansamycins_PATH_ko01051 | LADA vs T2D     |

# Biosynthesis\_of\_ansamycins\_PATH\_koC

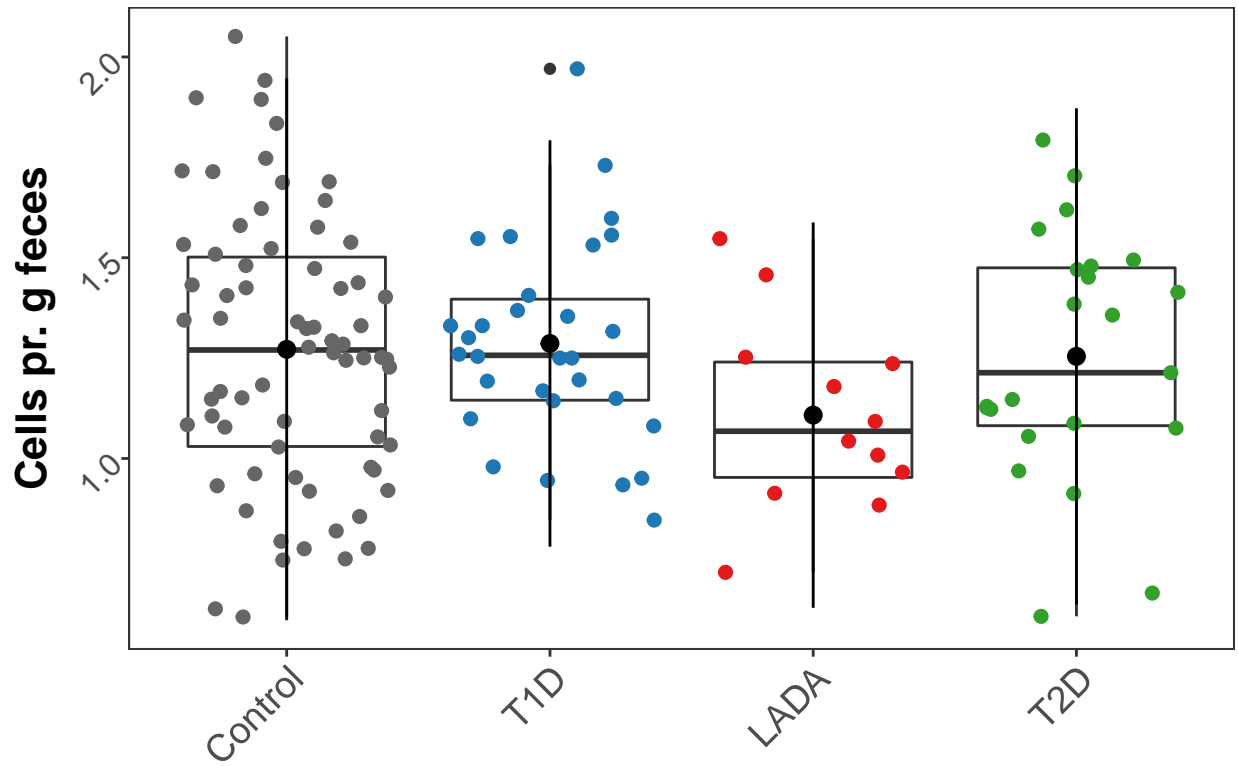

|      | pvalue    | padj      | Genus             | compare         |
|------|-----------|-----------|-------------------|-----------------|
| 584  | 0.0093098 | 0.0346055 | Carbon_metabolism | LADA vs Control |
| 388  | 0.0474683 | 0.0828378 | Carbon_metabolism | Control vs T2D  |
| 976  | 0.0263571 | 0.2312928 | Carbon_metabolism | LADA vs T1D     |
| 780  | 0.1274183 | 0.6495082 | Carbon_metabolism | T1D vs T2D      |
| 1172 | 0.3452479 | 0.8415375 | Carbon_metabolism | LADA vs T2D     |
| 192  | 0.8048908 | 0.8764366 | Carbon_metabolism | Control vs T1D  |

# Carbon\_metabolism

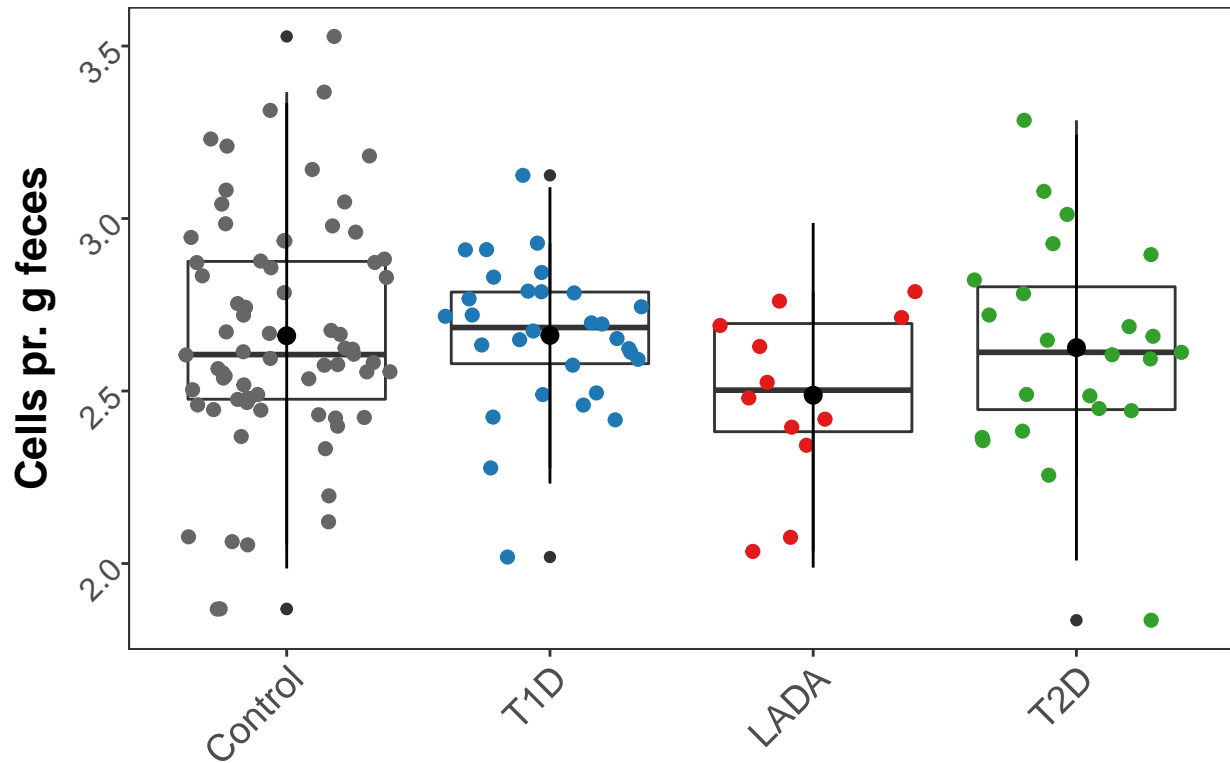

|      | pvalue    | padj      | Genus                              | compare         |
|------|-----------|-----------|------------------------------------|-----------------|
| 538  | 0.0093267 | 0.0346055 | Vitamin_B6_metabolism_PATH_ko00750 | LADA vs Control |
| 342  | 0.0322314 | 0.0690674 | Vitamin_B6_metabolism_PATH_ko00750 | Control vs T2D  |
| 930  | 0.1277440 | 0.2813238 | Vitamin_B6_metabolism_PATH_ko00750 | LADA vs T1D     |
| 146  | 0.1807526 | 0.4762288 | Vitamin_B6_metabolism_PATH_ko00750 | Control vs T1D  |
| 734  | 0.4218191 | 0.6614124 | Vitamin_B6_metabolism_PATH_ko00750 | T1D vs T2D      |
| 1126 | 0.4033226 | 0.8415375 | Vitamin_B6_metabolism_PATH_ko00750 | LADA vs T2D     |

# Vitamin\_B6\_metabolism\_PATH\_ko00750

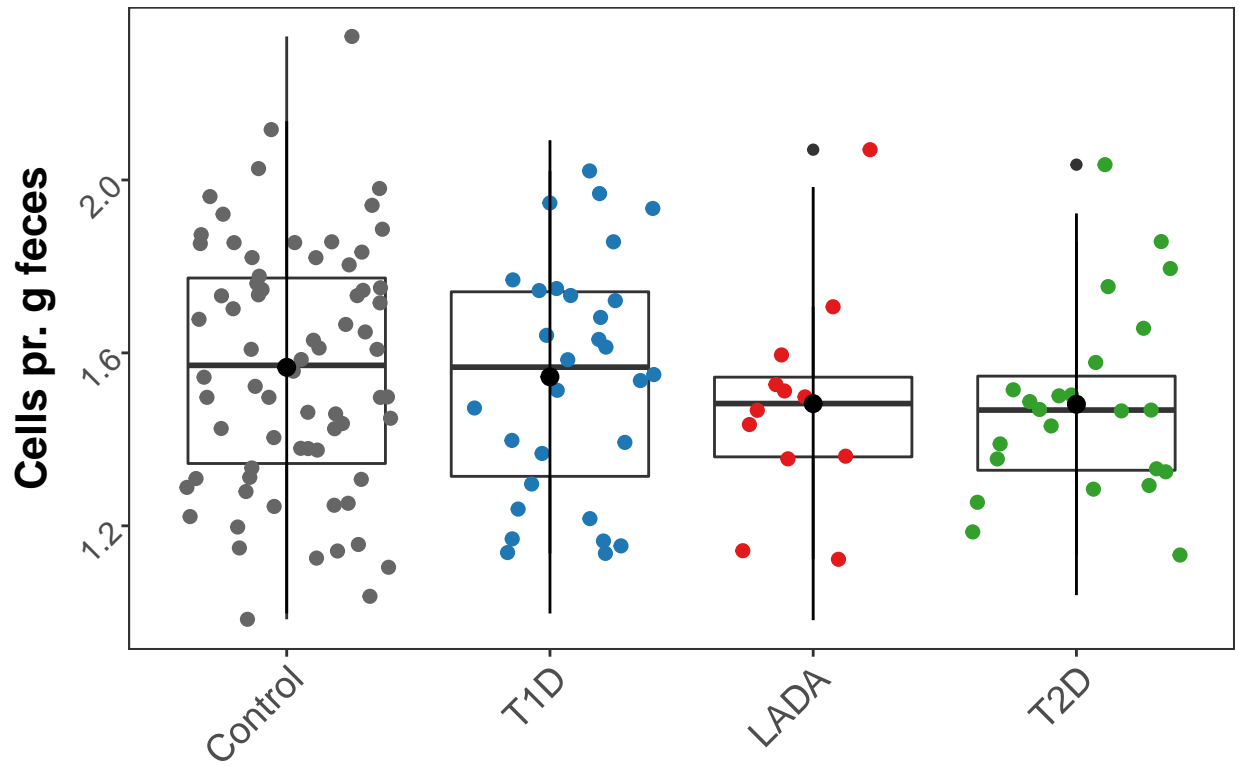

|     | pvalue    | padj      | Genus                               | compare         |
|-----|-----------|-----------|-------------------------------------|-----------------|
| 395 | 0.0093611 | 0.0346055 | Cell_cycle_Caulobacter_PATH_ko04112 | LADA vs Control |
| 199 | 0.0236843 | 0.0676342 | Cell_cycle_Caulobacter_PATH_ko04112 | Control vs T2D  |
| 787 | 0.0969302 | 0.2458003 | Cell_cycle_Caulobacter_PATH_ko04112 | LADA vs T1D     |
| 3   | 0.2616893 | 0.4839499 | Cell_cycle_Caulobacter_PATH_ko04112 | Control vs T1D  |
| 591 | 0.2810224 | 0.6495082 | Cell_cycle_Caulobacter_PATH_ko04112 | T1D vs T2D      |
| 983 | 0.4513661 | 0.8415375 | Cell_cycle_Caulobacter_PATH_ko04112 | LADA vs T2D     |

# Cell\_cycle\_\_\_Caulobacter\_PATH\_ko0411

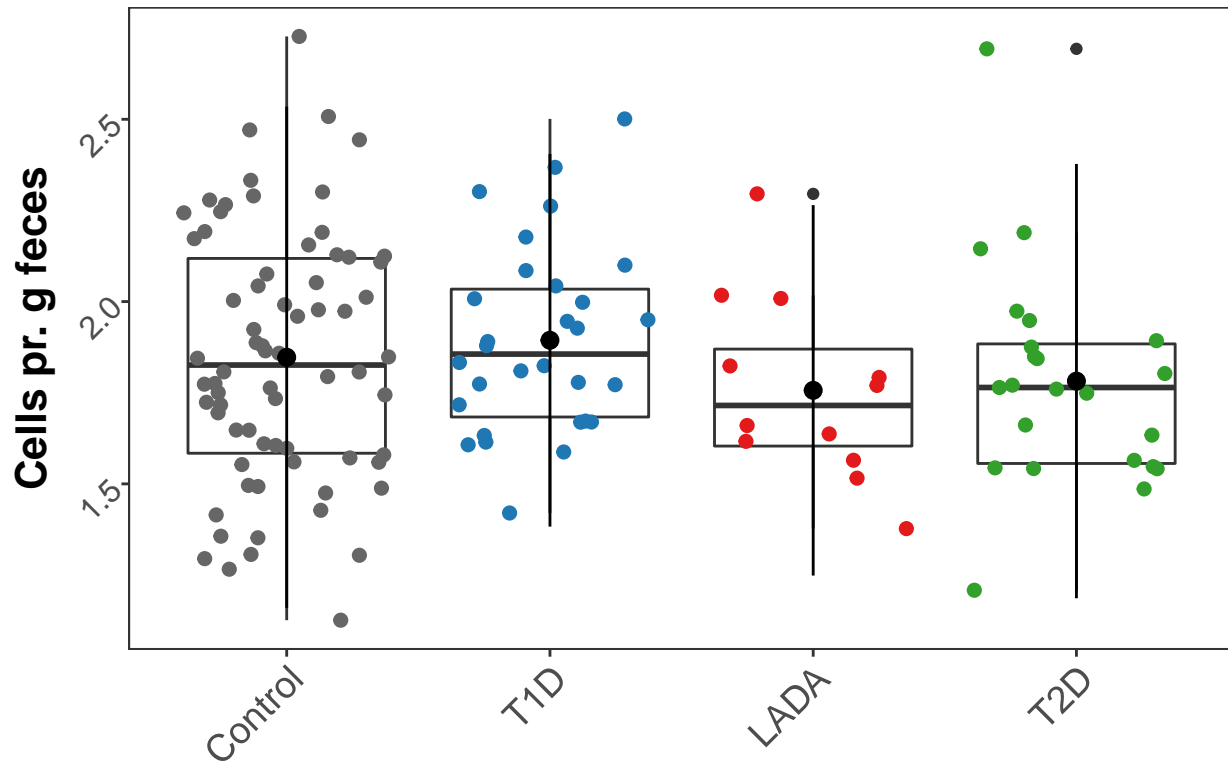

|      | pvalue    | padj      | Genus                       | compare         |
|------|-----------|-----------|-----------------------------|-----------------|
| 441  | 0.0094888 | 0.0346055 | RNA_polymerase_PATH_ko03020 | LADA vs Control |
| 833  | 0.0019374 | 0.0632892 | RNA_polymerase_PATH_ko03020 | LADA vs T1D     |
| 245  | 0.1877779 | 0.2478669 | RNA_polymerase_PATH_ko03020 | Control vs T2D  |
| 49   | 0.2552029 | 0.4839499 | RNA_polymerase_PATH_ko03020 | Control vs T1D  |
| 637  | 0.0415381 | 0.6495082 | RNA_polymerase_PATH_ko03020 | T1D vs T2D      |
| 1029 | 0.1654793 | 0.8415375 | RNA_polymerase_PATH_ko03020 | LADA vs T2D     |

# RNA\_polymerase\_PATH\_ko03020

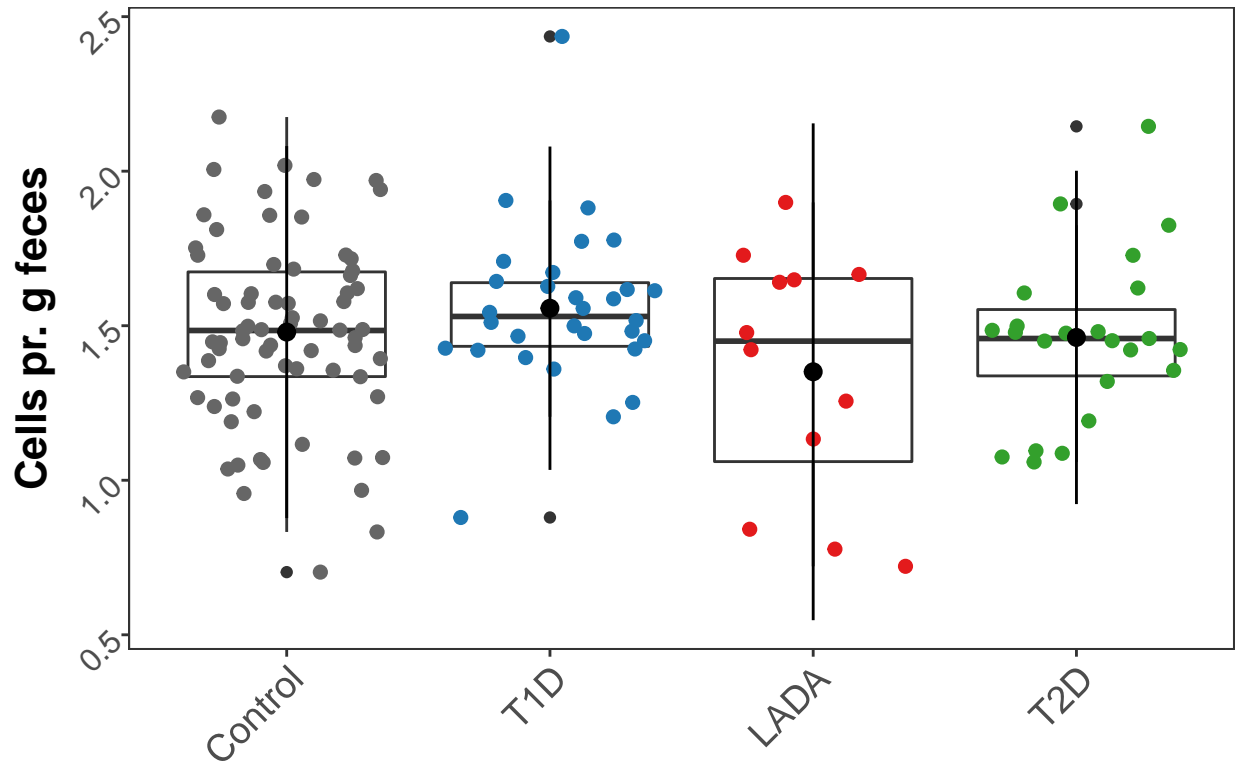

|      | pvalue    | padj      | Genus                        | compare         |
|------|-----------|-----------|------------------------------|-----------------|
| 431  | 0.0095968 | 0.0346055 | RNA_degradation_PATH_ko03018 | LADA vs Control |
| 235  | 0.0299230 | 0.0676342 | RNA_degradation_PATH_ko03018 | Control vs T2D  |
| 823  | 0.0747378 | 0.2321553 | RNA_degradation_PATH_ko03018 | LADA vs T1D     |
| 39   | 0.3581075 | 0.5414362 | RNA_degradation_PATH_ko03018 | Control vs T1D  |
| 627  | 0.2463768 | 0.6495082 | RNA_degradation_PATH_ko03018 | T1D vs T2D      |
| 1019 | 0.4195931 | 0.8415375 | RNA_degradation_PATH_ko03018 | LADA vs T2D     |



# RNA\_degradation\_PATH\_ko03018

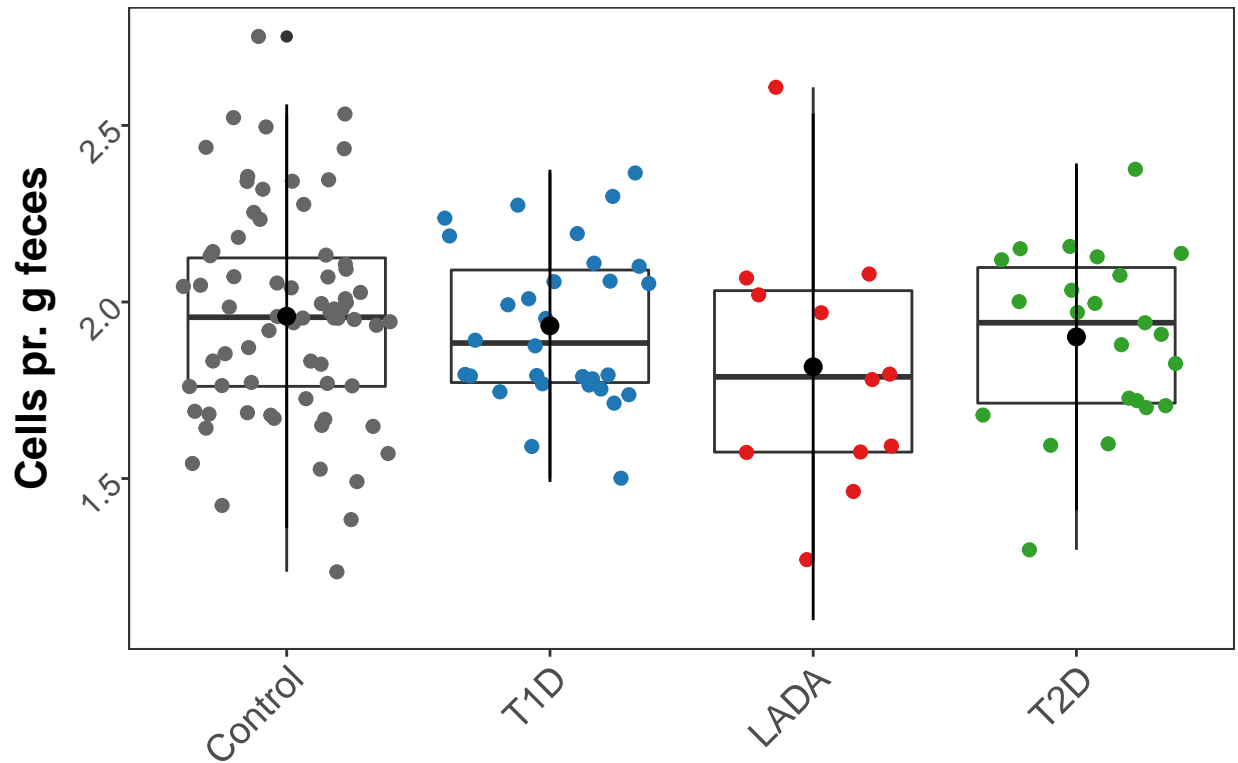

|      | pvalue    | padj      | Genus                                               | compare         |
|------|-----------|-----------|-----------------------------------------------------|-----------------|
| 530  | 0.0098505 | 0.0346055 | Nicotinate_and_nicotinamide_metabolism_PATH_ko00760 | LADA vs Control |
| 334  | 0.0295520 | 0.0676342 | Nicotinate_and_nicotinamide_metabolism_PATH_ko00760 | Control vs T2D  |
| 922  | 0.1137191 | 0.2685416 | Nicotinate_and_nicotinamide_metabolism_PATH_ko00760 | LADA vs T1D     |
| 138  | 0.2225672 | 0.4786856 | Nicotinate_and_nicotinamide_metabolism_PATH_ko00760 | Control vs T1D  |
| 726  | 0.3540970 | 0.6495082 | Nicotinate_and_nicotinamide_metabolism_PATH_ko00760 | Control vs T2D  |
| 1118 | 0.4260888 | 0.8415375 | Nicotinate_and_nicotinamide_metabolism_PATH_ko00760 | LADA vs T2D     |

# Nicotinate\_and\_nicotinamide\_metabolis

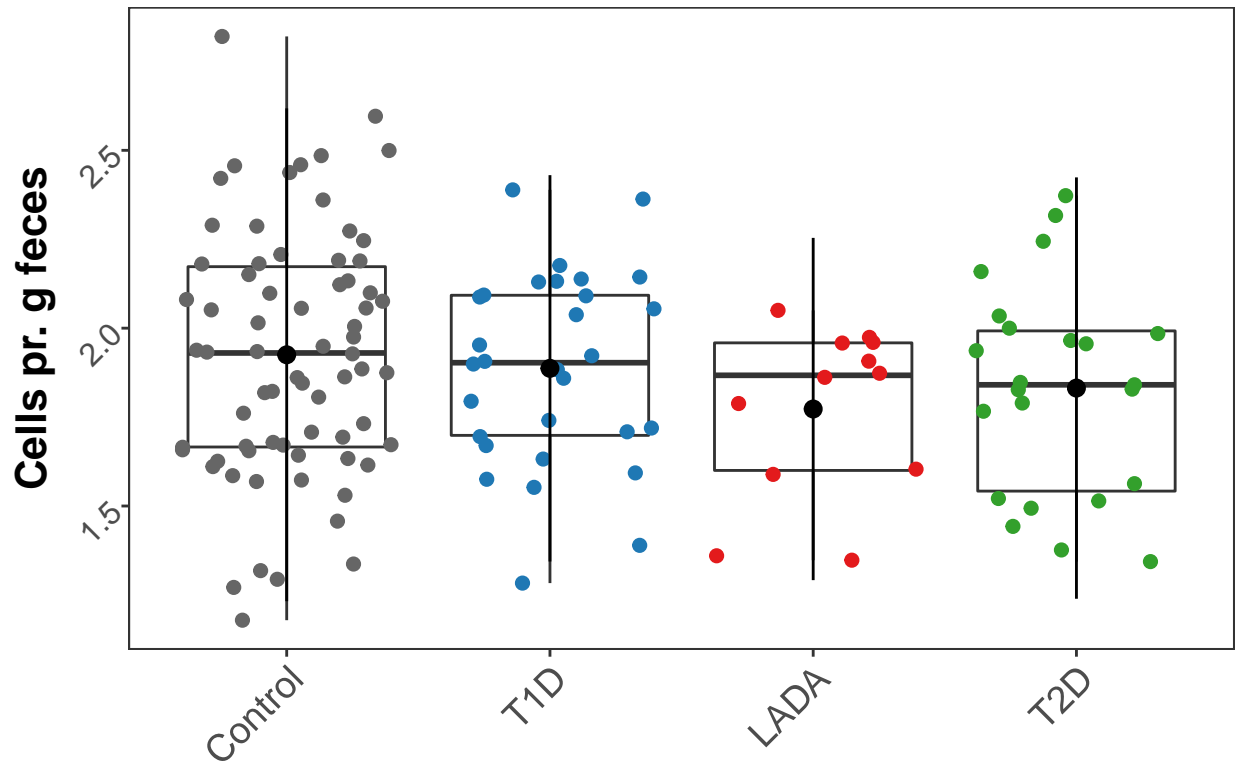

|      | pvalue    | padj      | Genus                                 | compare         |
|------|-----------|-----------|---------------------------------------|-----------------|
| 436  | 0.0098873 | 0.0346055 | Homologous_recombination_PATH_ko03440 | LADA vs Control |
| 240  | 0.0168177 | 0.0629443 | Homologous_recombination_PATH_ko03440 | Control vs T2D  |
| 828  | 0.2444332 | 0.3950690 | Homologous_recombination_PATH_ko03440 | LADA vs T1D     |
| 44   | 0.0612454 | 0.3992571 | Homologous_recombination_PATH_ko03440 | Control vs T1D  |
| 632  | 0.5488814 | 0.7077681 | Homologous_recombination_PATH_ko03440 | T1D vs T2D      |
| 1024 | 0.5157439 | 0.8415375 | Homologous_recombination_PATH_ko03440 | LADA vs T2D     |

# Homologous\_recombination\_PATH\_ko00965

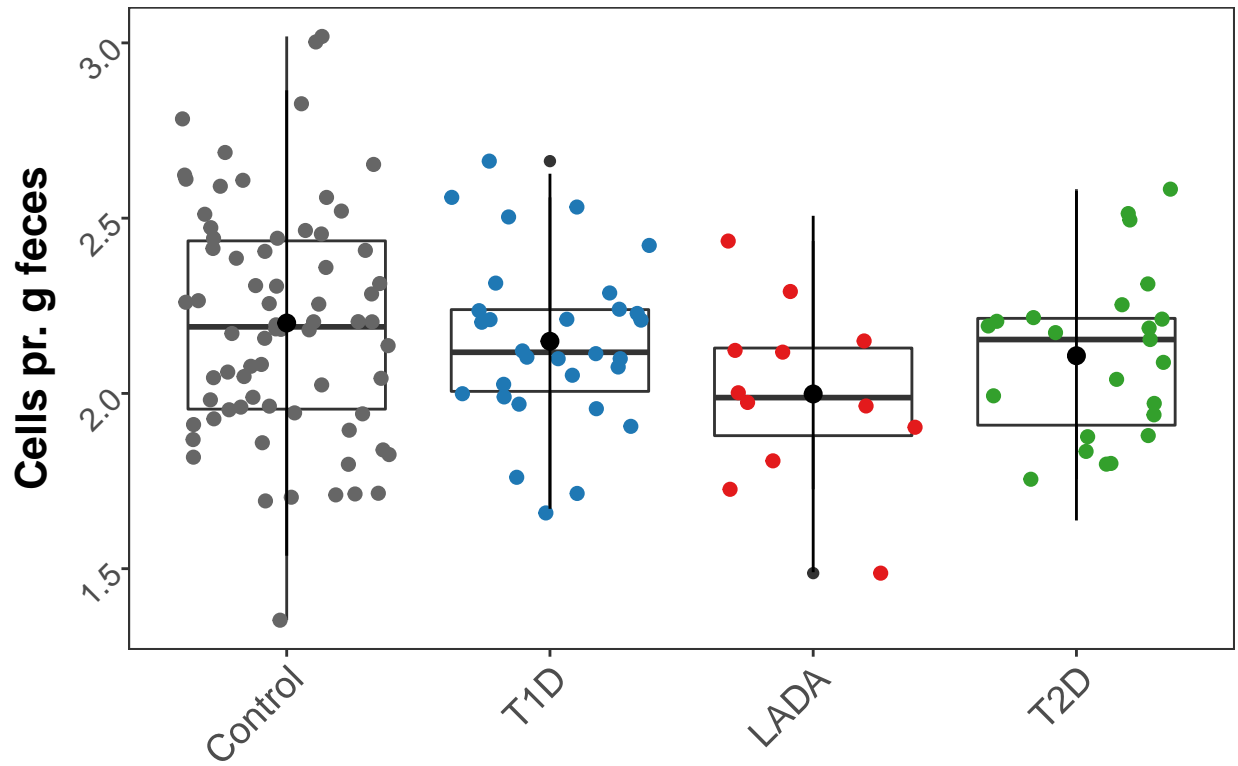

|      | pvalue    | padj      | Genus                              | compare         |
|------|-----------|-----------|------------------------------------|-----------------|
| 854  | 0.0004749 | 0.0358391 | Betalain_biosynthesis_PATH_ko00965 | LADA vs T1D     |
| 462  | 0.0151820 | 0.0437599 | Betalain_biosynthesis_PATH_ko00965 | LADA vs Control |
| 70   | 0.0463003 | 0.3992571 | Betalain_biosynthesis_PATH_ko00965 | Control vs T1D  |
| 658  | 0.1588008 | 0.6495082 | Betalain_biosynthesis_PATH_ko00965 | T1D vs T2D      |
| 1050 | 0.0241387 | 0.7163761 | Betalain_biosynthesis_PATH_ko00965 | LADA vs T2D     |
| 266  | 0.8531983 | NA        | Betalain_biosynthesis_PATH_ko00965 | Control vs T2D  |

# Betalain\_biosynthesis\_PATH\_ko00965

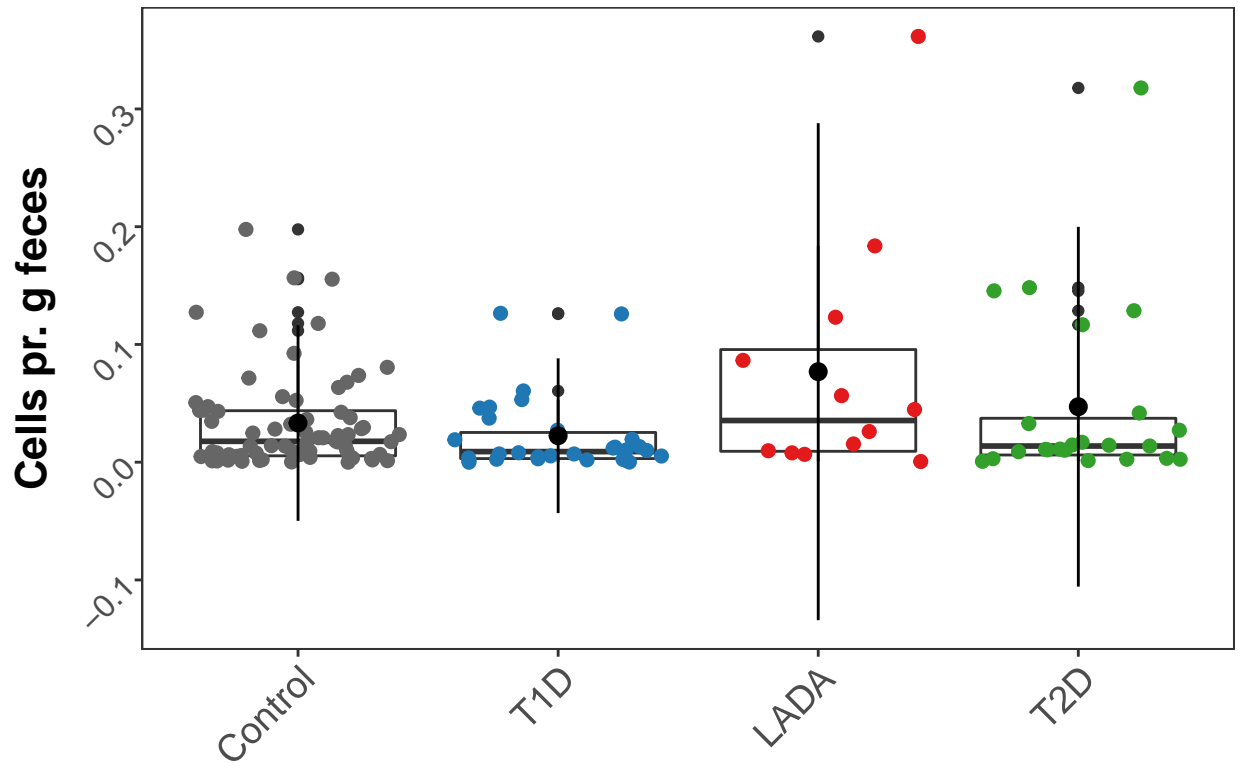

|      | pvalue    | padj      | Genus                                            | compare         |
|------|-----------|-----------|--------------------------------------------------|-----------------|
| 837  | 0.0005486 | 0.0358391 | Ribosome_biosynthesis_in_eukaryotes_PATH_ko03008 | LADA vs T1D     |
| 445  | 0.0252415 | 0.0574628 | Ribosome_biosynthesis_in_eukaryotes_PATH_ko03008 | LADA vs Control |
| 53   | 0.0274263 | 0.3732360 | Ribosome_biosynthesis_in_eukaryotes_PATH_ko03008 | Control vs T1D  |
| 641  | 0.0709048 | 0.6495082 | Ribosome_biosynthesis_in_eukaryotes_PATH_ko03008 | T1D vs T2D      |
| 1033 | 0.0562470 | 0.8415375 | Ribosome_biosynthesis_in_eukaryotes_PATH_ko03008 | LADA vs T2D     |
| 249  | 0.9360017 | 0.9474864 | Ribosome_biosynthesis_in_eukaryotes_PATH_ko03008 | Control vs T2D  |

# Ribosome\_biogenesis\_in\_eukaryotes\_P

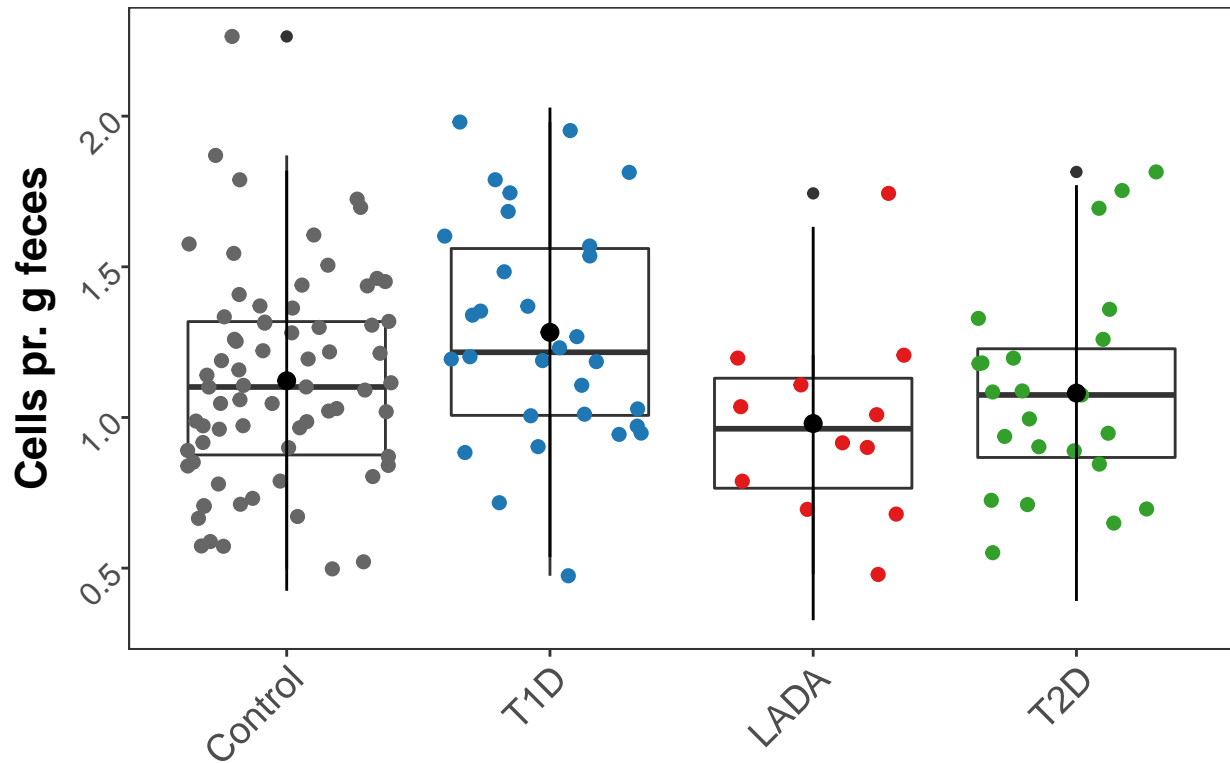

|      | pvalue    | padj      | Genus                            | compare         |
|------|-----------|-----------|----------------------------------|-----------------|
| 432  | 0.0107440 | 0.0369444 | Sulfur_relay_system_PATH_ko04122 | LADA vs Control |
| 236  | 0.0039485 | 0.0629443 | Sulfur_relay_system_PATH_ko04122 | Control vs T2D  |
| 824  | 0.2403419 | 0.3950690 | Sulfur_relay_system_PATH_ko04122 | LADA vs T1D     |
| 40   | 0.0695942 | 0.3992571 | Sulfur_relay_system_PATH_ko04122 | Control vs T1D  |
| 628  | 0.2842821 | 0.6495082 | Sulfur_relay_system_PATH_ko04122 | T1D vs T2D      |
| 1020 | 0.7696384 | 0.9035121 | Sulfur_relay_system_PATH_ko04122 | LADA vs T2D     |

# Sulfur\_relay\_system\_PATH\_ko04122

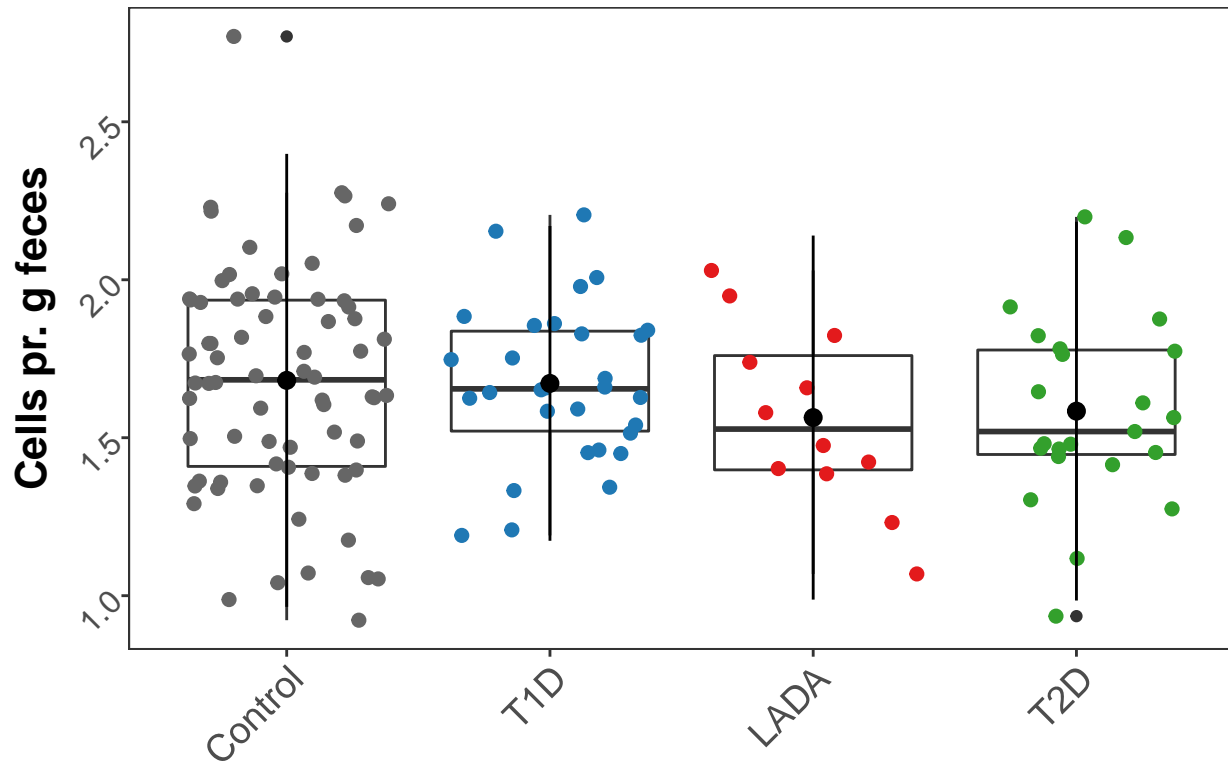

|      | pvalue    | padj      | Genus                                      | compare         |
|------|-----------|-----------|--------------------------------------------|-----------------|
| 486  | 0.0109597 | 0.0369488 | Inositol_phosphate_metabolism_PATH_ko00562 | LADA vs Control |
| 290  | 0.0725466 | 0.1129262 | Inositol_phosphate_metabolism_PATH_ko00562 | Control vs T2D  |
| 878  | 0.0256663 | 0.2312928 | Inositol_phosphate_metabolism_PATH_ko00562 | LADA vs T1D     |
| 682  | 0.1501277 | 0.6495082 | Inositol_phosphate_metabolism_PATH_ko00562 | T1D vs T2D      |
| 1074 | 0.3076733 | 0.8415375 | Inositol_phosphate_metabolism_PATH_ko00562 | LADA vs T2D     |
| 94   | 0.8807551 | 0.9133756 | Inositol_phosphate_metabolism_PATH_ko00562 | Control vs T1D  |

# Inositol\_phosphate\_metabolism\_PATH\_I

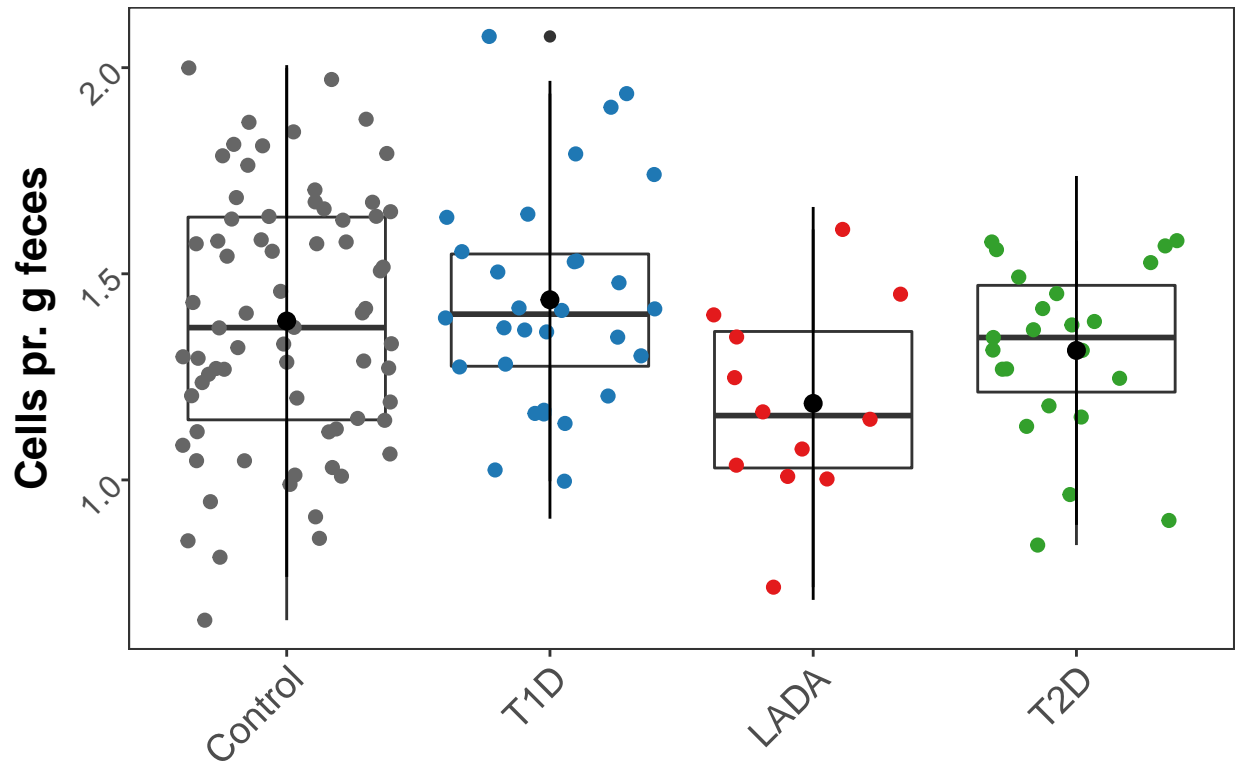

|      | pvalue    | padj      | Genus                             | compare         |
|------|-----------|-----------|-----------------------------------|-----------------|
| 483  | 0.0111223 | 0.0369488 | Galactose_metabolism_PATH_ko00052 | LADA vs Control |
| 287  | 0.0260671 | 0.0676342 | Galactose_metabolism_PATH_ko00052 | Control vs T2D  |
| 875  | 0.1527901 | 0.3130237 | Galactose_metabolism_PATH_ko00052 | LADA vs T1D     |
| 91   | 0.1623691 | 0.4612224 | Galactose_metabolism_PATH_ko00052 | Control vs T1D  |
| 679  | 0.4067555 | 0.6531957 | Galactose_metabolism_PATH_ko00052 | T1D vs T2D      |
| 1071 | 0.4680274 | 0.8415375 | Galactose_metabolism_PATH_ko00052 | LADA vs T2D     |

# Galactose\_metabolism\_PATH\_ko00052

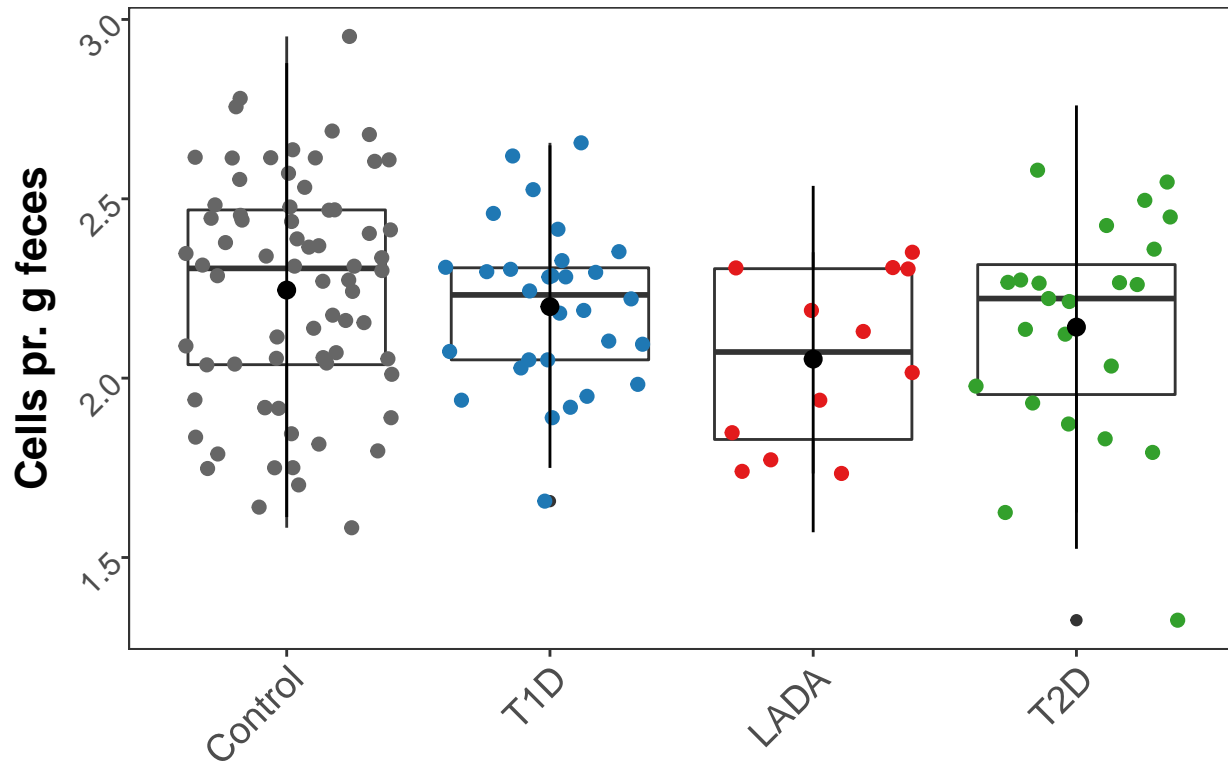

|      | pvalue    | padj      | Genus                              | compare         |
|------|-----------|-----------|------------------------------------|-----------------|
| 489  | 0.0116283 | 0.0379856 | Propanoate_metabolism_PATH_ko00640 | LADA vs Control |
| 293  | 0.0292621 | 0.0676342 | Propanoate_metabolism_PATH_ko00640 | Control vs T2D  |
| 881  | 0.0500475 | 0.2312928 | Propanoate_metabolism_PATH_ko00640 | LADA vs T1D     |
| 685  | 0.1440432 | 0.6495082 | Propanoate_metabolism_PATH_ko00640 | T1D vs T2D      |
| 97   | 0.5853946 | 0.7171084 | Propanoate_metabolism_PATH_ko00640 | Control vs T1D  |
| 1077 | 0.4577488 | 0.8415375 | Propanoate_metabolism_PATH_ko00640 | LADA vs T2D     |



# Propanoate\_metabolism\_PATH\_ko00640

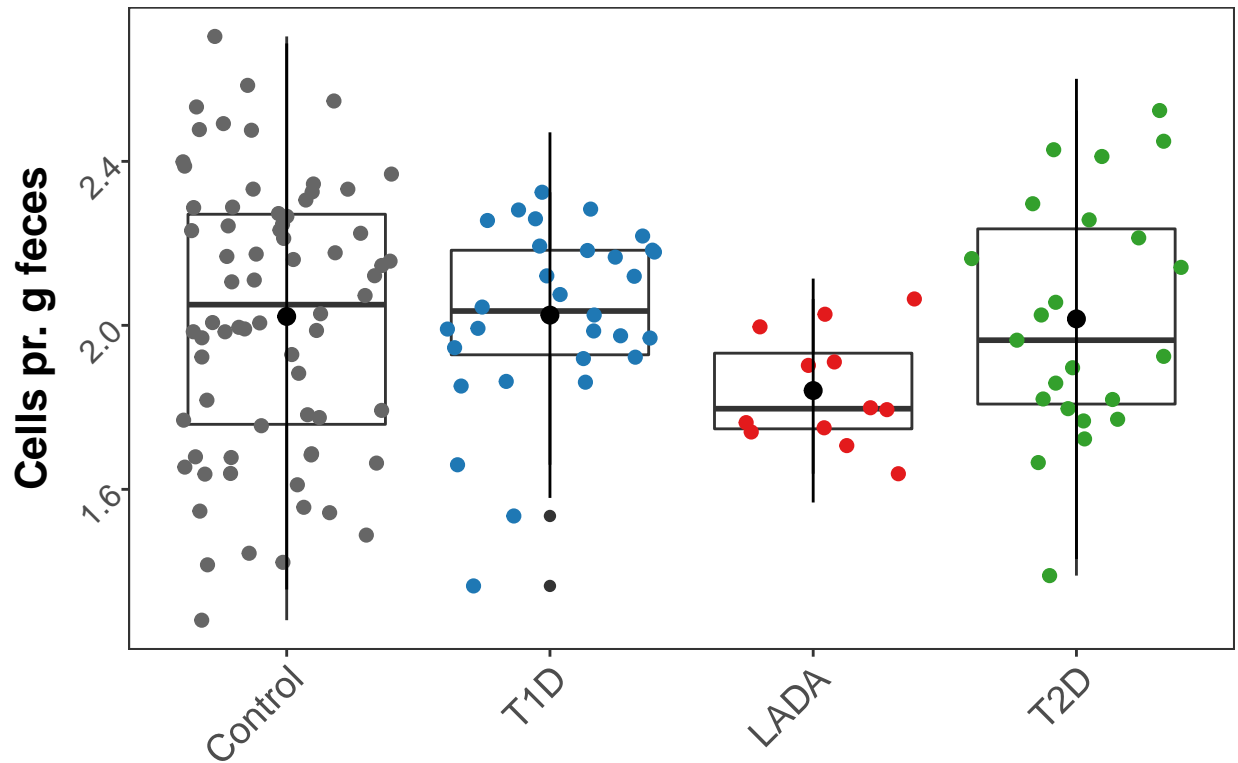

|      | pvalue    | padj      | Genus                                          | compare         |
|------|-----------|-----------|------------------------------------------------|-----------------|
| 478  | 0.0121652 | 0.0386411 | Ascorbate_and_aldarate_metabolism_PATH_ko00053 | LADA vs Control |
| 282  | 0.1373404 | 0.1888431 | Ascorbate_and_aldarate_metabolism_PATH_ko00053 | Control vs T2D  |
| 870  | 0.0407827 | 0.2312928 | Ascorbate_and_aldarate_metabolism_PATH_ko00053 | LADA vs T1D     |
| 674  | 0.3255773 | 0.6495082 | Ascorbate_and_aldarate_metabolism_PATH_ko00053 | T1D vs T2D      |
| 86   | 0.6981221 | 0.7863905 | Ascorbate_and_aldarate_metabolism_PATH_ko00053 | Control vs T1D  |
| 1066 | 0.2312647 | 0.8415375 | Ascorbate_and_aldarate_metabolism_PATH_ko00053 | LADA vs T2D     |

# Ascorbate\_and\_aldarate\_metabolism\_P/

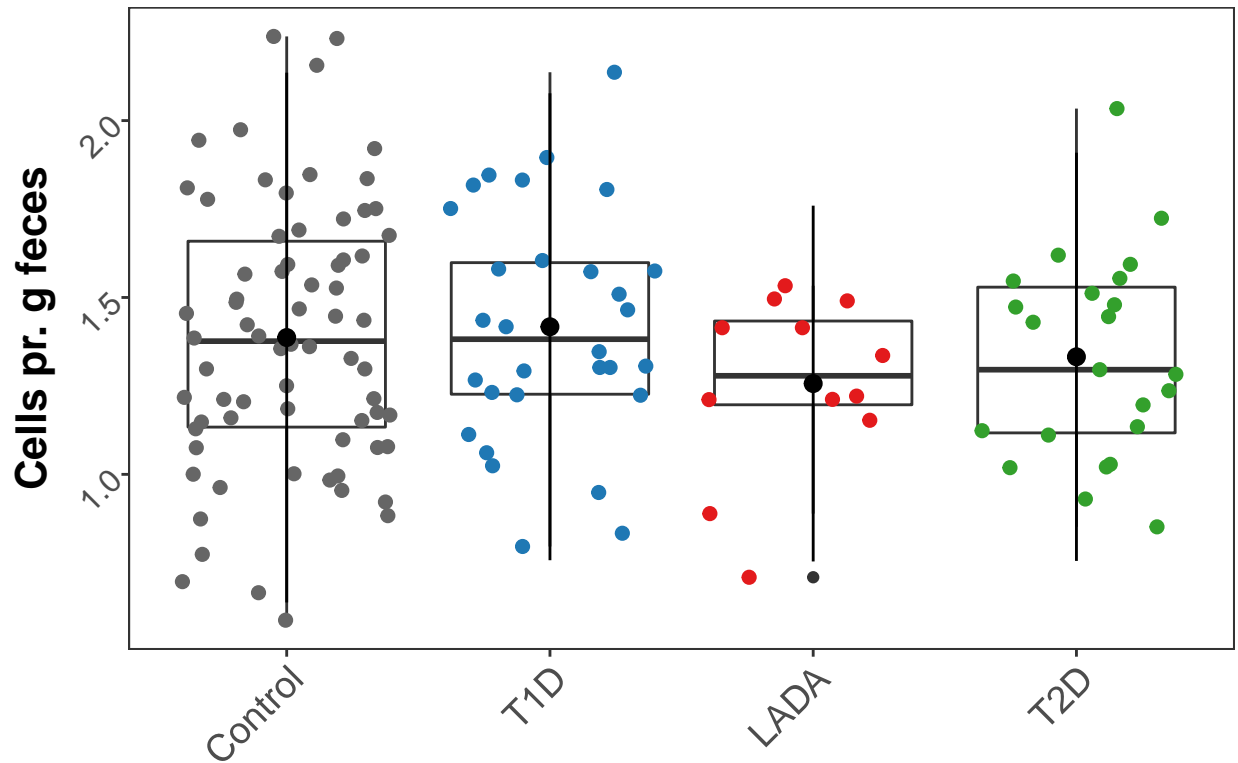

|      | pvalue    | padj      | Genus                                  | compare         |
|------|-----------|-----------|----------------------------------------|-----------------|
| 531  | 0.0122232 | 0.0386411 | One_carbon_pool_by_folate_PATH_ko00670 | LADA vs Control |
| 335  | 0.0163756 | 0.0629443 | One_carbon_pool_by_folate_PATH_ko00670 | Control vs T2D  |
| 139  | 0.0672435 | 0.3992571 | One_carbon_pool_by_folate_PATH_ko00670 | Control vs T1D  |
| 923  | 0.2615182 | 0.4051834 | One_carbon_pool_by_folate_PATH_ko00670 | LADA vs T1D     |
| 727  | 0.5217040 | 0.6862683 | One_carbon_pool_by_folate_PATH_ko00670 | T1D vs T2D      |
| 1119 | 0.5630593 | 0.8682081 | One_carbon_pool_by_folate_PATH_ko00670 | LADA vs T2D     |

# One\_carbon\_pool\_by\_folate\_PATH\_ko00

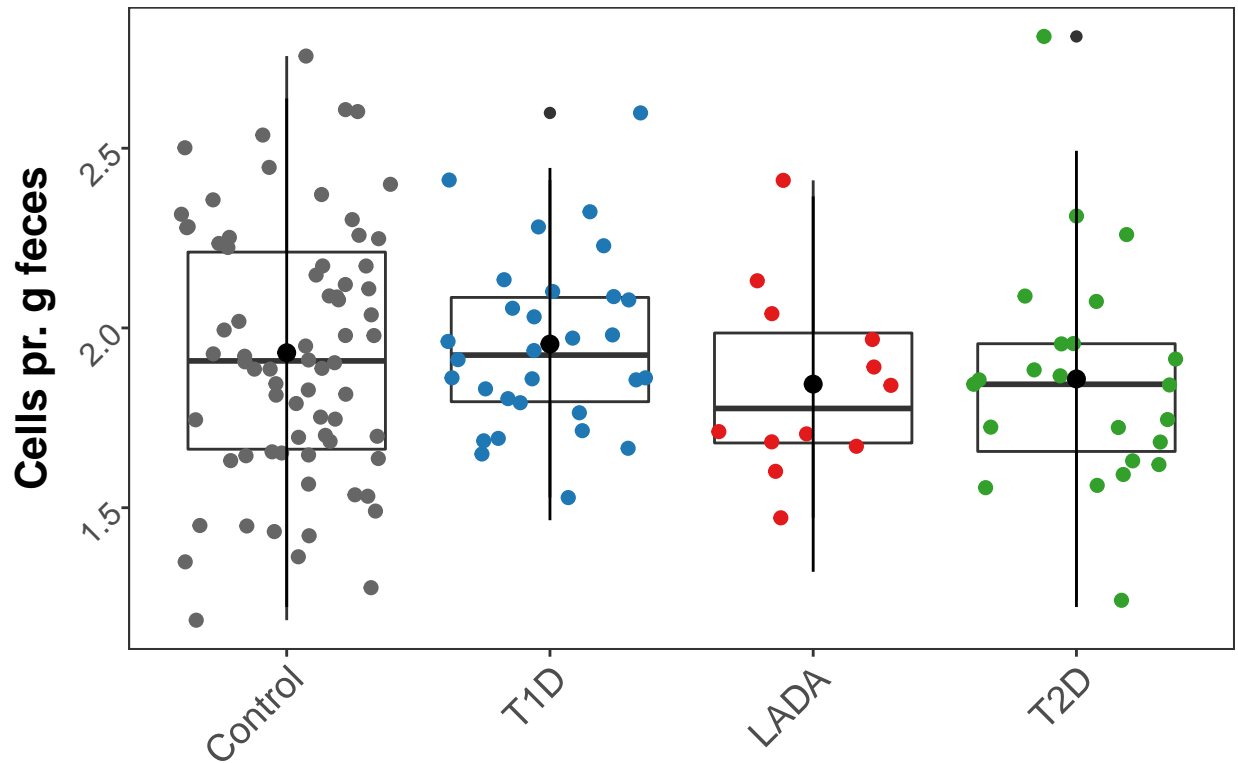

|      | pvalue    | padj      | Genus                                       | compare         |
|------|-----------|-----------|---------------------------------------------|-----------------|
| 519  | 0.0125377 | 0.0390061 | Glycerophospholipid_metabolism_PATH_ko00564 | LADA vs Control |
| 323  | 0.0052216 | 0.0629443 | Glycerophospholipid_metabolism_PATH_ko00564 | Control vs T2D  |
| 127  | 0.0346349 | 0.3989340 | Glycerophospholipid_metabolism_PATH_ko00564 | Control vs T1D  |
| 911  | 0.3502724 | 0.4939093 | Glycerophospholipid_metabolism_PATH_ko00564 | LADA vs T1D     |
| 715  | 0.4480294 | 0.6743371 | Glycerophospholipid_metabolism_PATH_ko00564 | T1D vs T2D      |
| 1107 | 0.7600330 | 0.9035121 | Glycerophospholipid_metabolism_PATH_ko00564 | LADA vs T2D     |

# Glycerophospholipid\_metabolism\_PATH

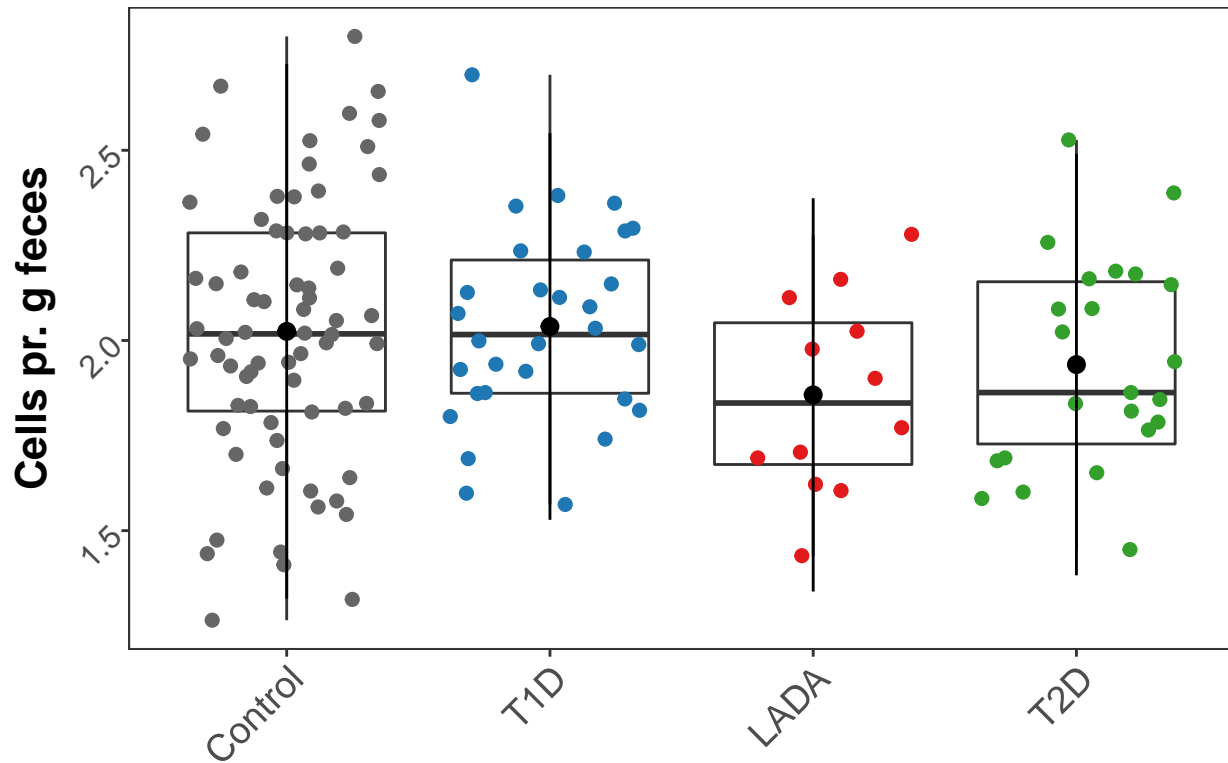

|     | pvalue    | padj      | Genus                             | compare         |
|-----|-----------|-----------|-----------------------------------|-----------------|
| 8   | 0.0002559 | 0.0390382 | Bacterial_chemotaxis_PATH_ko02030 | Control vs T1D  |
| 204 | 0.0174619 | 0.0629443 | Bacterial_chemotaxis_PATH_ko02030 | Control vs T2D  |
| 400 | 0.1339488 | 0.1888774 | Bacterial_chemotaxis_PATH_ko02030 | LADA vs Control |
| 792 | 0.3345360 | 0.4786062 | Bacterial_chemotaxis_PATH_ko02030 | LADA vs T1D     |
| 596 | 0.4135351 | 0.6536523 | Bacterial_chemotaxis_PATH_ko02030 | T1D vs T2D      |
| 988 | 0.7724100 | 0.9035121 | Bacterial_chemotaxis_PATH_ko02030 | LADA vs T2D     |

# Bacterial\_chemotaxis\_PATH\_ko02030

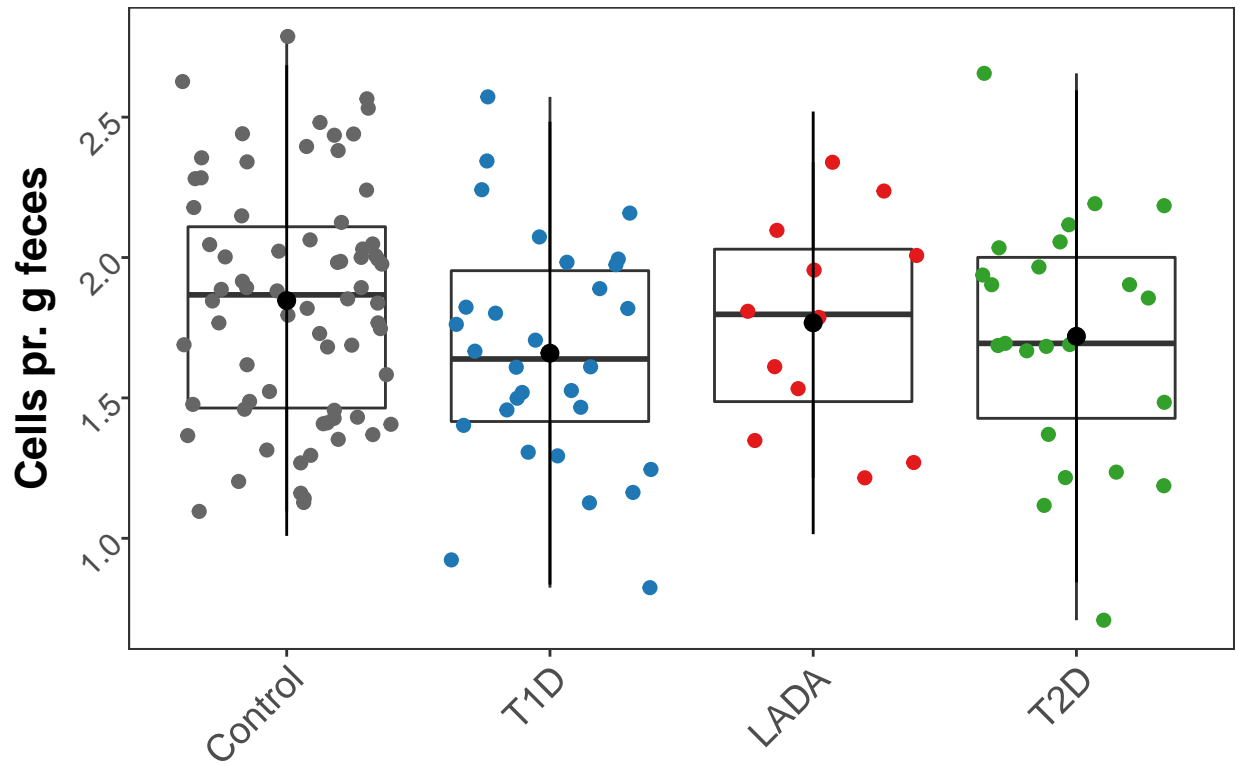

|     | pvalue    | padj      | Genus                           | compare         |
|-----|-----------|-----------|---------------------------------|-----------------|
| 9   | 0.0003983 | 0.0390382 | Flagellar_assembly_PATH_ko02040 | Control vs T1D  |
| 205 | 0.0183278 | 0.0630017 | Flagellar_assembly_PATH_ko02040 | Control vs T2D  |
| 401 | 0.1637355 | 0.2244207 | Flagellar_assembly_PATH_ko02040 | LADA vs Control |
| 793 | 0.3229047 | 0.4653626 | Flagellar_assembly_PATH_ko02040 | LADA vs T1D     |
| 597 | 0.4577468 | 0.6743371 | Flagellar_assembly_PATH_ko02040 | T1D vs T2D      |
| 989 | 0.7112165 | 0.9028767 | Flagellar_assembly_PATH_ko02040 | LADA vs T2D     |

# Flagellar\_assembly\_PATH\_ko02040

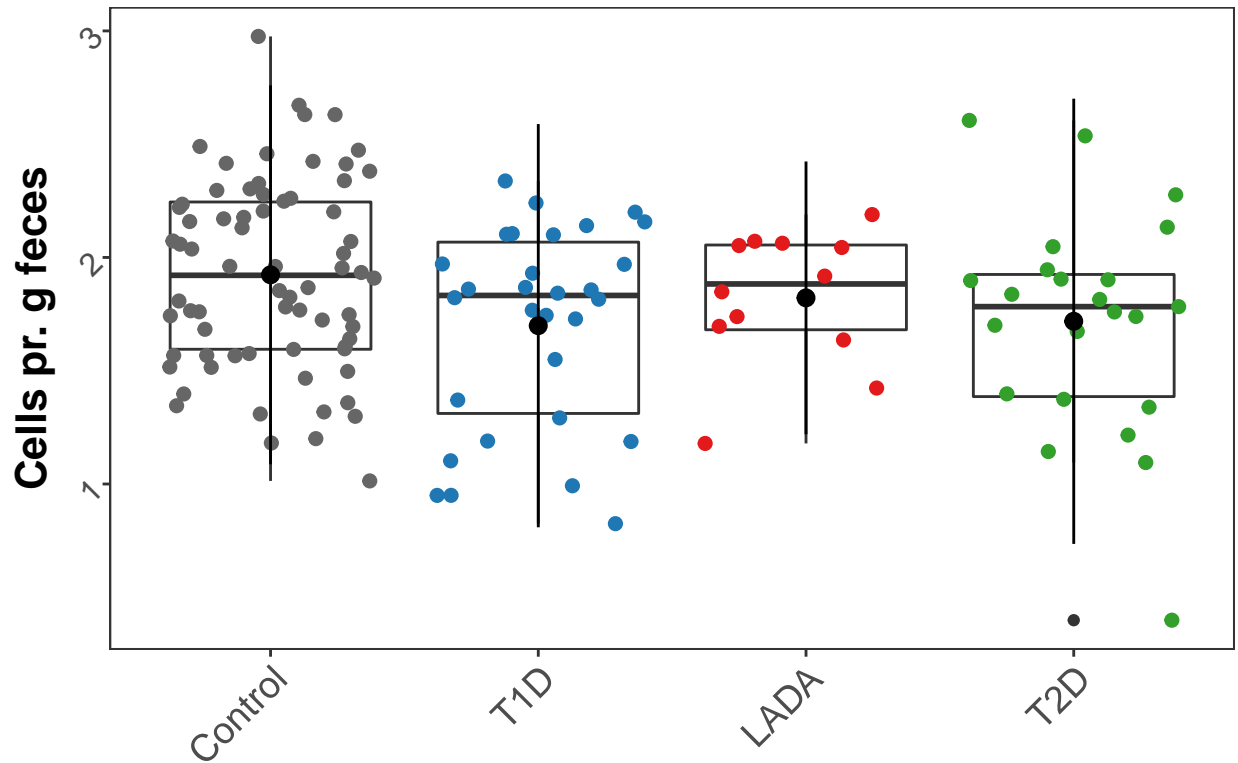

|      | pvalue    | padj      | Genus                                              | compare         |
|------|-----------|-----------|----------------------------------------------------|-----------------|
| 461  | 0.0127739 | 0.0391200 | Acarbose_and_validamycin_biosynthesis_PATH_ko00525 | LADA vs Control |
| 265  | 0.1201192 | 0.1708584 | Acarbose_and_validamycin_biosynthesis_PATH_ko00525 | Control vs T2D  |
| 853  | 0.1098309 | 0.2625227 | Acarbose_and_validamycin_biosynthesis_PATH_ko00525 | LADA vs T1D     |
| 69   | 0.2880557 | 0.5040976 | Acarbose_and_validamycin_biosynthesis_PATH_ko00525 | Control vs T1D  |
| 657  | 0.6091039 | 0.7461523 | Acarbose_and_validamycin_biosynthesis_PATH_ko00525 | T1D vs T2D      |
| 1049 | 0.2560853 | 0.8415375 | Acarbose_and_validamycin_biosynthesis_PATH_ko00525 | LADA vs T2D     |

# Acarbose\_and\_validamycin\_biosynthesi

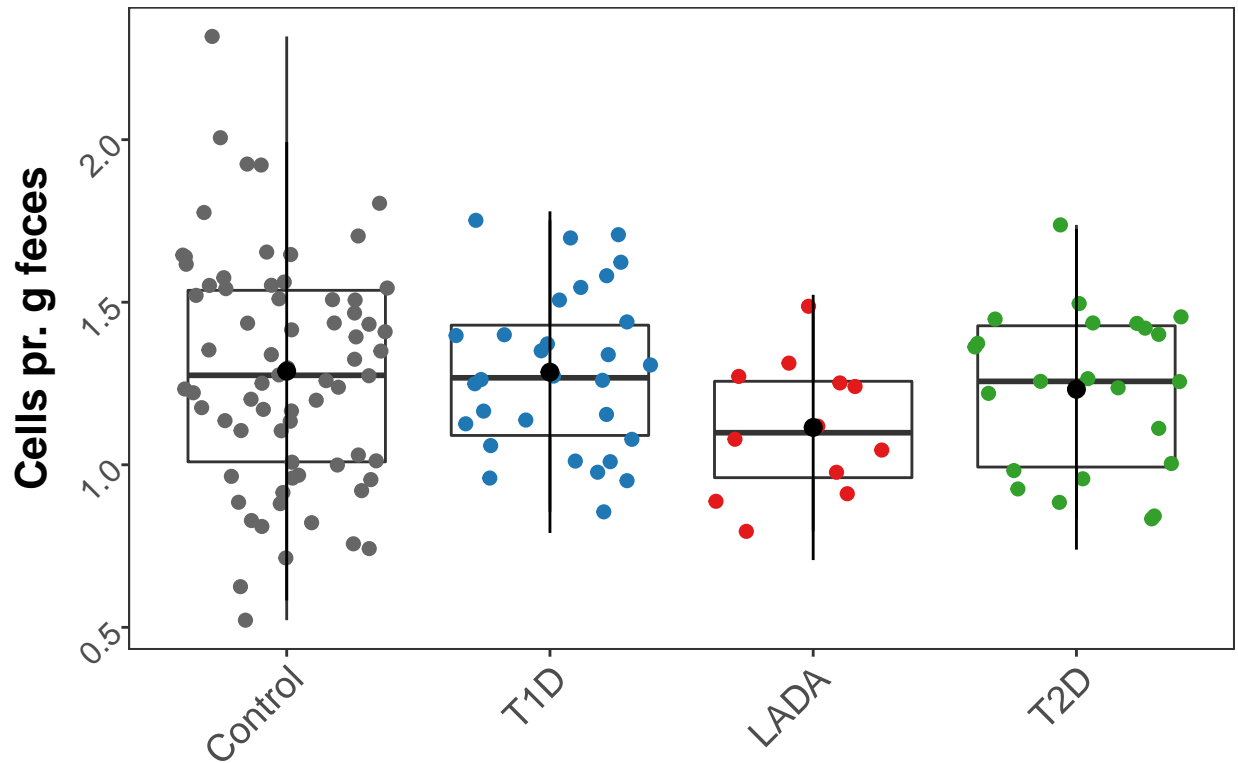

|      | pvalue    | padj      | Genus                            | compare         |
|------|-----------|-----------|----------------------------------|-----------------|
| 495  | 0.0136810 | 0.0408927 | Nitrogen_metabolism_PATH_ko00910 | LADA vs Control |
| 299  | 0.0243965 | 0.0676342 | Nitrogen_metabolism_PATH_ko00910 | Control vs T2D  |
| 887  | 0.2621789 | 0.4051834 | Nitrogen_metabolism_PATH_ko00910 | LADA vs T1D     |
| 103  | 0.0758886 | 0.4131714 | Nitrogen_metabolism_PATH_ko00910 | Control vs T1D  |
| 691  | 0.5793903 | 0.7326484 | Nitrogen_metabolism_PATH_ko00910 | T1D vs T2D      |
| 1083 | 0.5195161 | 0.8415375 | Nitrogen_metabolism_PATH_ko00910 | LADA vs T2D     |

# Nitrogen\_metabolism\_PATH\_ko00910

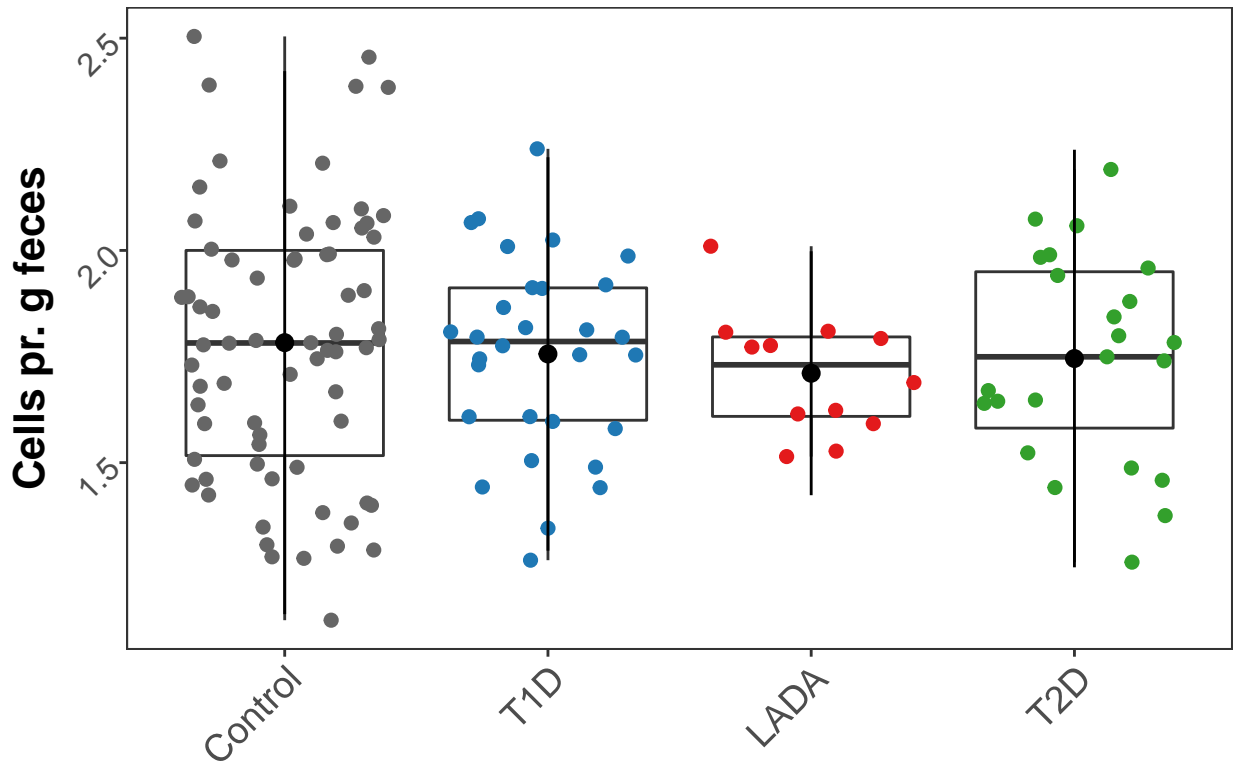

|      | pvalue    | padj      | Genus                                        | compare         |
|------|-----------|-----------|----------------------------------------------|-----------------|
| 482  | 0.0137700 | 0.0408927 | Fructose_and_mannose_metabolism_PATH_ko00910 | LADA vs Control |
| 286  | 0.0118980 | 0.0629443 | Fructose_and_mannose_metabolism_PATH_ko00910 | Control vs T2D  |
| 874  | 0.0856896 | 0.2434080 | Fructose_and_mannose_metabolism_PATH_ko00910 | LADA vs T1D     |
| 90   | 0.4027257 | 0.5803987 | Fructose_and_mannose_metabolism_PATH_ko00910 | Control vs T1D  |
| 678  | 0.1279380 | 0.6495082 | Fructose_and_mannose_metabolism_PATH_ko00910 | T1D vs T2D      |
| 1070 | 0.6428962 | 0.8841442 | Fructose_and_mannose_metabolism_PATH_ko00910 | LADA vs T2D     |



# Fructose\_and\_mannose\_metabolism\_P/

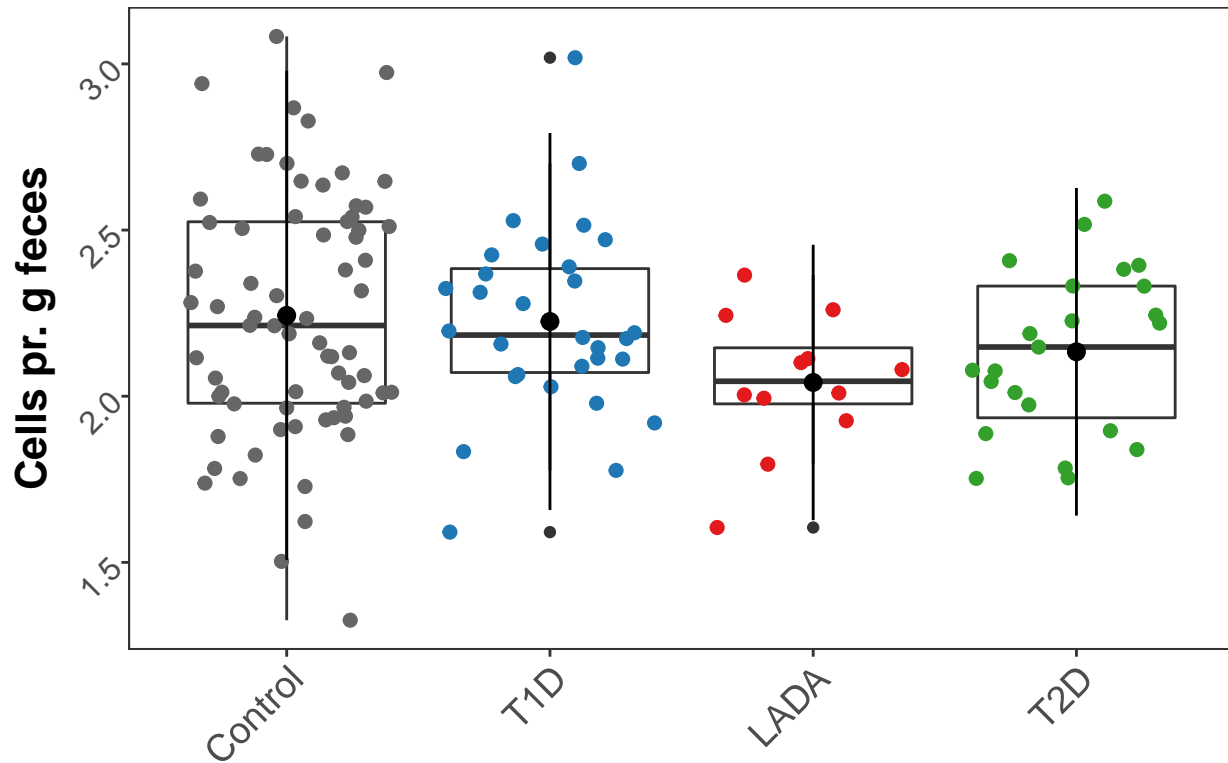

|      | pvalue    | padj      | Genus                                | compare         |
|------|-----------|-----------|--------------------------------------|-----------------|
| 418  | 0.0147613 | 0.0431823 | HIF_1_signaling_pathway_PATH_ko04066 | LADA vs Control |
| 222  | 0.0268340 | 0.0676342 | HIF_1_signaling_pathway_PATH_ko04066 | Control vs T2D  |
| 810  | 0.0581556 | 0.2312928 | HIF_1_signaling_pathway_PATH_ko04066 | LADA vs T1D     |
| 614  | 0.1320422 | 0.6495082 | HIF_1_signaling_pathway_PATH_ko04066 | T1D vs T2D      |
| 26   | 0.5991991 | 0.7249570 | HIF_1_signaling_pathway_PATH_ko04066 | Control vs T1D  |
| 1006 | 0.5189261 | 0.8415375 | HIF_1_signaling_pathway_PATH_ko04066 | LADA vs T2D     |

# HIF\_1\_signaling\_pathway\_PATH\_ko0406

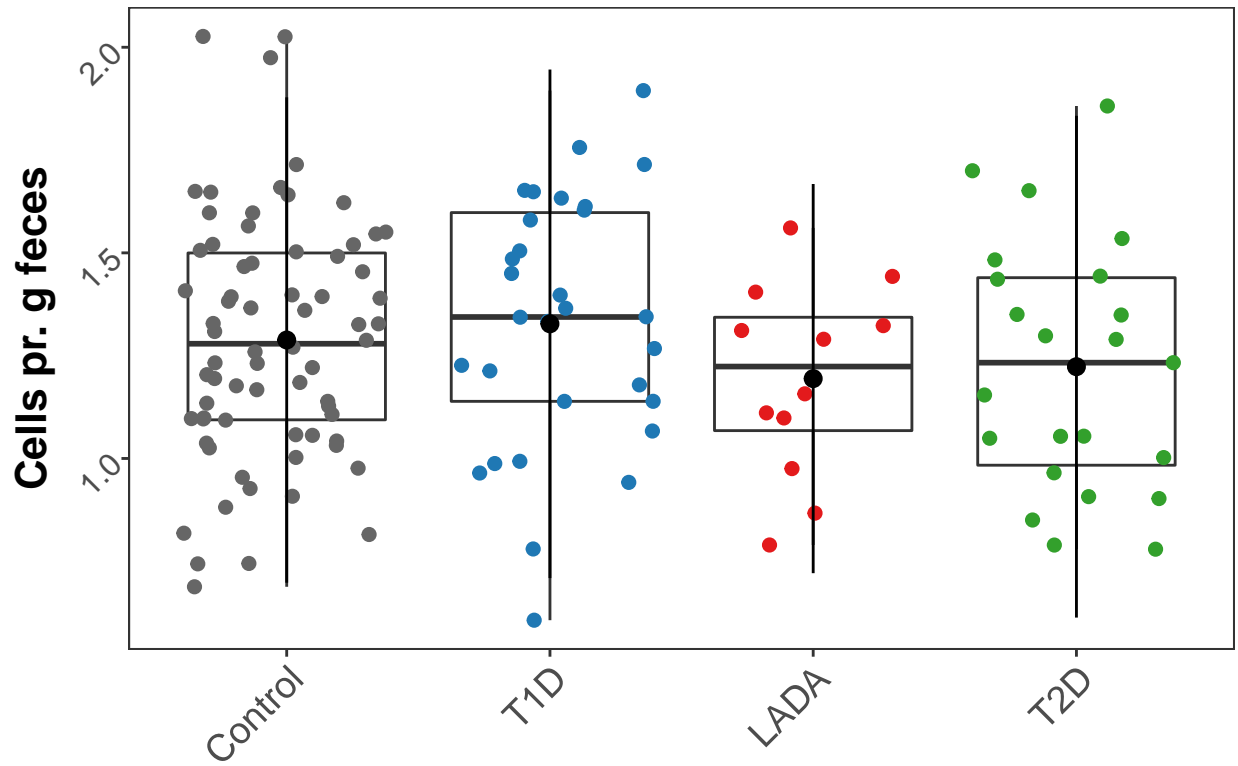

|      | pvalue    | padj      | Genus                                              | compare         |
|------|-----------|-----------|----------------------------------------------------|-----------------|
| 423  | 0.0157014 | 0.0442859 | Phosphatidylinositol_signaling_system_PATH_ko04070 | LADA vs Control |
| 227  | 0.0404618 | 0.0767378 | Phosphatidylinositol_signaling_system_PATH_ko04070 | Control vs T2D  |
| 31   | 0.0427429 | 0.3989340 | Phosphatidylinositol_signaling_system_PATH_ko04070 | Control vs T1D  |
| 815  | 0.3600446 | 0.5040625 | Phosphatidylinositol_signaling_system_PATH_ko04070 | LADA vs T1D     |
| 1011 | 0.4613299 | 0.8415375 | Phosphatidylinositol_signaling_system_PATH_ko04070 | LADA vs T2D     |
| 619  | 0.8559827 | 0.8876857 | Phosphatidylinositol_signaling_system_PATH_ko04070 | T1D vs T2D      |

# Phosphatidylinositol\_signaling\_system\_

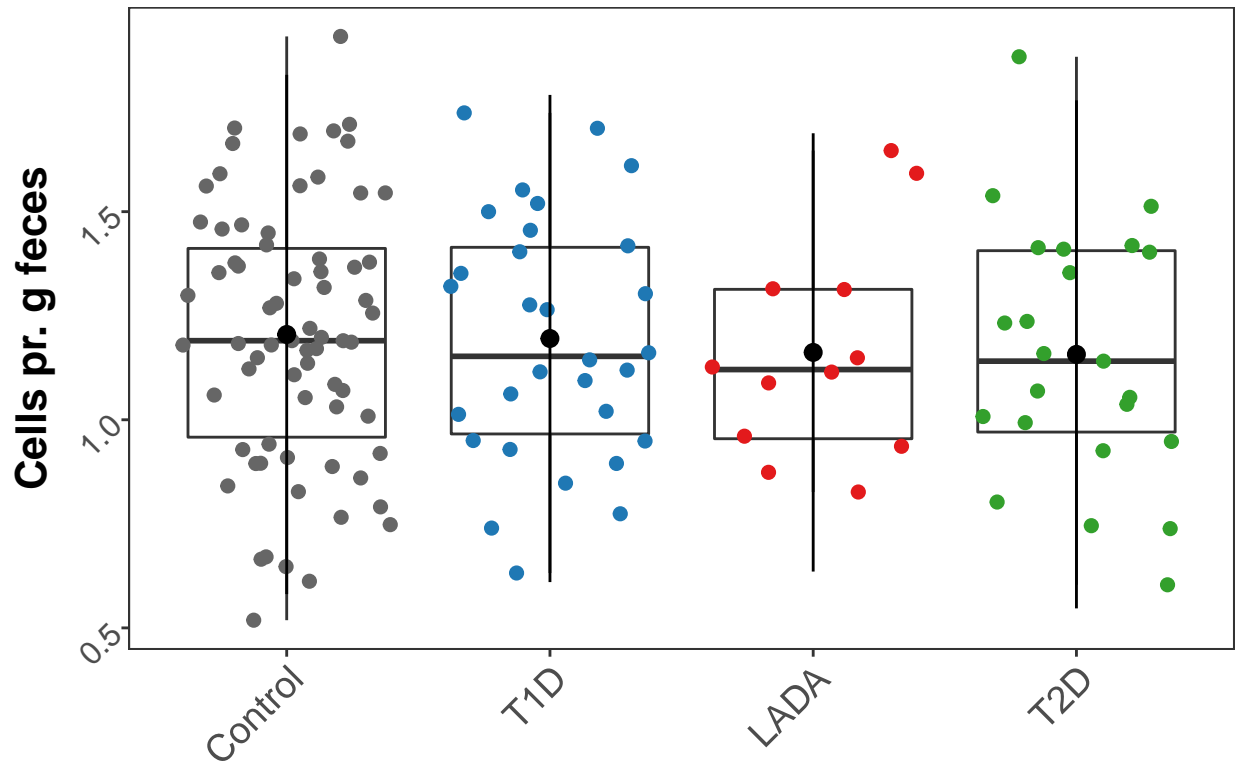

|      | pvalue    | padj      | Genus                         | compare         |
|------|-----------|-----------|-------------------------------|-----------------|
| 412  | 0.0158164 | 0.0442859 | ABC_transporters_PATH_ko02010 | LADA vs Control |
| 216  | 0.0110469 | 0.0629443 | ABC_transporters_PATH_ko02010 | Control vs T2D  |
| 20   | 0.0136110 | 0.2904843 | ABC_transporters_PATH_ko02010 | Control vs T1D  |
| 804  | 0.5280291 | 0.6550234 | ABC_transporters_PATH_ko02010 | LADA vs T1D     |
| 608  | 0.7940983 | 0.8695154 | ABC_transporters_PATH_ko02010 | T1D vs T2D      |
| 1000 | 0.6875910 | 0.9028767 | ABC_transporters_PATH_ko02010 | LADA vs T2D     |

# ABC\_transporters\_PATH\_ko02010

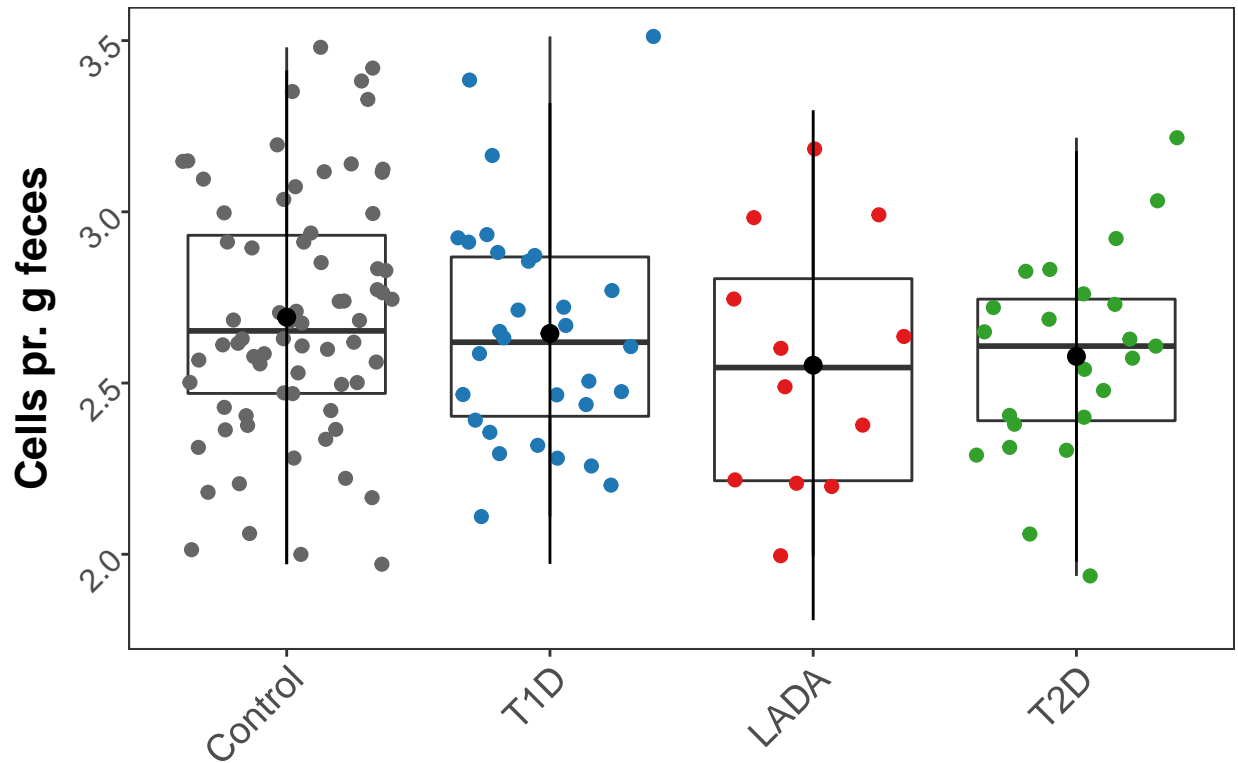

|      | pvalue    | padj      | Genus                             | compare         |
|------|-----------|-----------|-----------------------------------|-----------------|
| 433  | 0.0161830 | 0.0446743 | Base_excision_repair_PATH_ko03410 | LADA vs Control |
| 237  | 0.0146192 | 0.0629443 | Base_excision_repair_PATH_ko03410 | Control vs T2D  |
| 825  | 0.1371763 | 0.2954567 | Base_excision_repair_PATH_ko03410 | LADA vs T1D     |
| 41   | 0.2641971 | 0.4839499 | Base_excision_repair_PATH_ko03410 | Control vs T1D  |
| 629  | 0.2156093 | 0.6495082 | Base_excision_repair_PATH_ko03410 | T1D vs T2D      |
| 1021 | 0.6441080 | 0.8841442 | Base_excision_repair_PATH_ko03410 | LADA vs T2D     |

# Base\_excision\_repair\_PATH\_ko03410

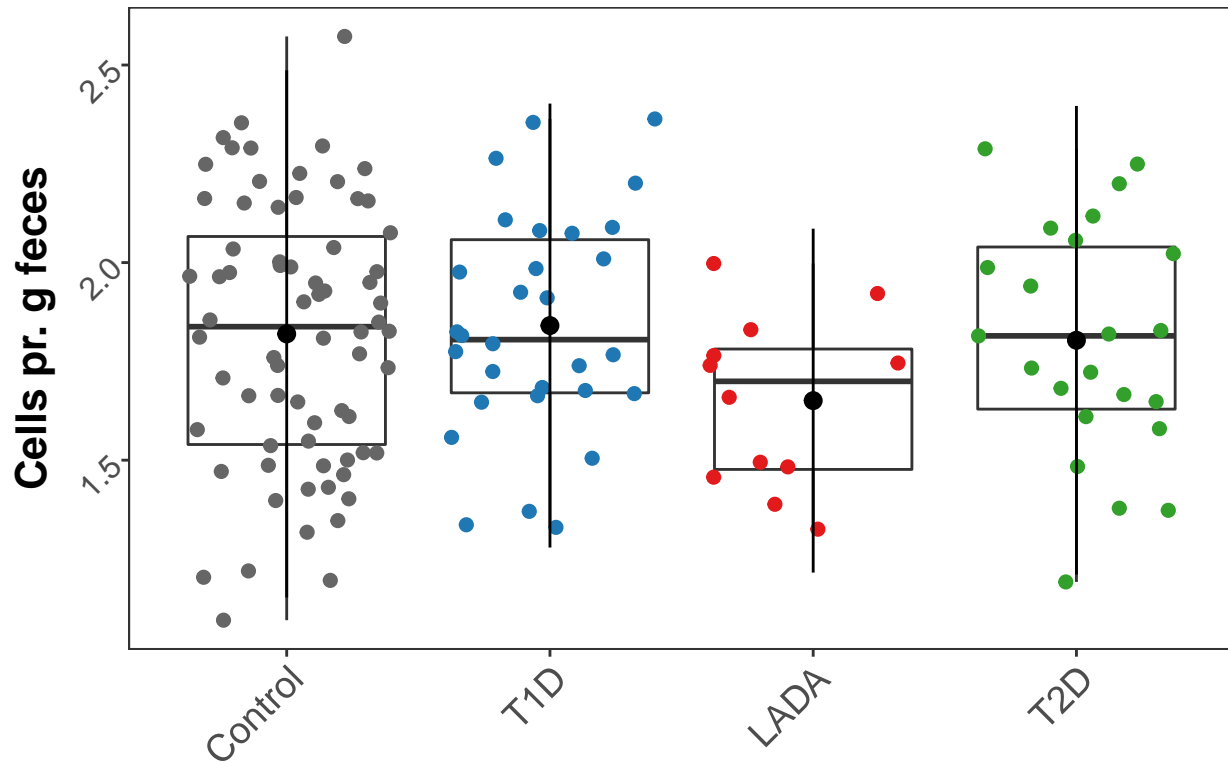

|      | pvalue    | padj      | Genus                                              | compare |
|------|-----------|-----------|----------------------------------------------------|---------|
| 573  | 0.0167594 | 0.0450038 | Metabolism_of_xenobiotics_by_cytochrome_P450_PATHL | Control |
| 965  | 0.0556750 | 0.2312928 | Metabolism_of_xenobiotics_by_cytochrome_P450_PATHL | T1D     |
| 1161 | 0.0062758 | 0.3088442 | Metabolism_of_xenobiotics_by_cytochrome_P450_PATHL | T2D     |
| 377  | 0.3472540 | 0.4257036 | Metabolism_of_xenobiotics_by_cytochrome_P450_PATHC | T2D     |
| 769  | 0.2488134 | 0.6495082 | Metabolism_of_xenobiotics_by_cytochrome_P450_PATHT | T2D     |
| 181  | 0.6676012 | 0.7652037 | Metabolism_of_xenobiotics_by_cytochrome_P450_PATHC | T1D     |

# Metabolism\_of\_xenobiotics\_by\_cytochrome

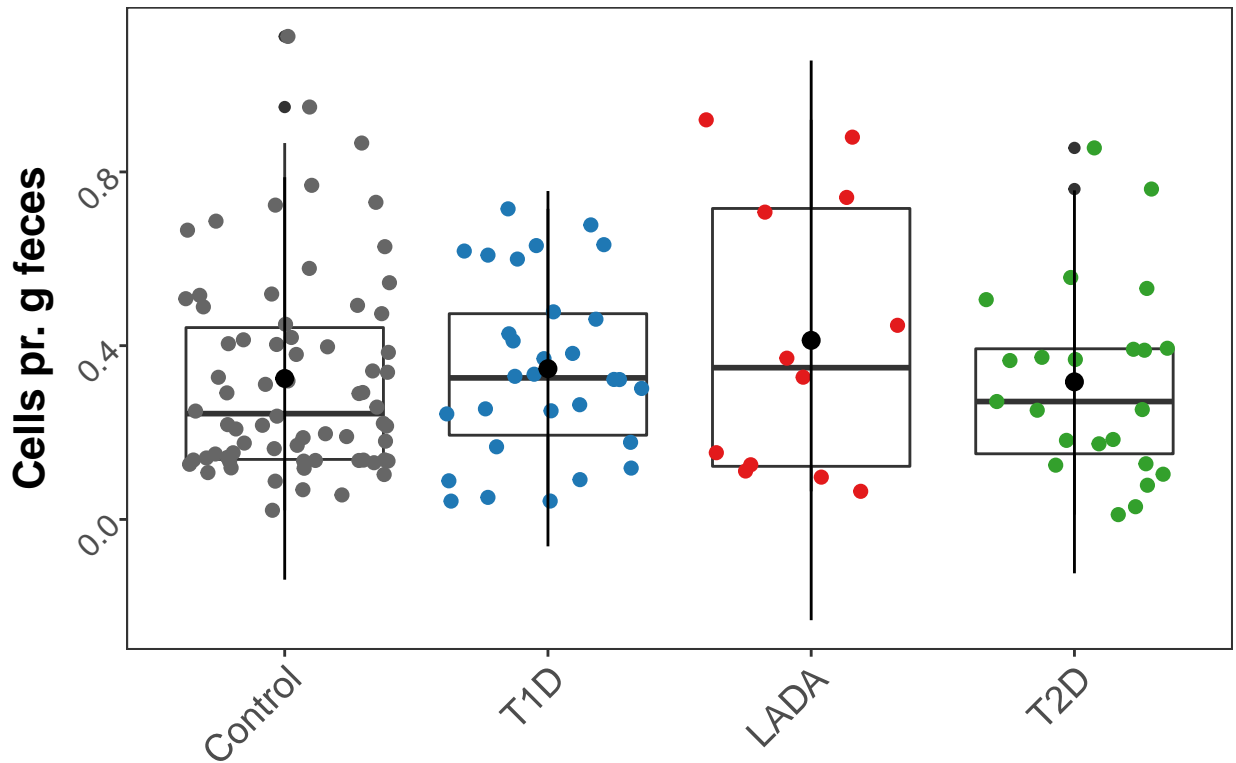

|      | pvalue    | padj      | Genus                                         | compare            |
|------|-----------|-----------|-----------------------------------------------|--------------------|
| 569  | 0.0167616 | 0.0450038 | Drug_metabolism__cytochrome_P450_PATH_ko00982 | Control vs Control |
| 961  | 0.0558959 | 0.2312928 | Drug_metabolism__cytochrome_P450_PATH_ko00982 | Control vs T1D     |
| 1157 | 0.0063029 | 0.3088442 | Drug_metabolism__cytochrome_P450_PATH_ko00982 | Control vs T2D     |
| 373  | 0.3483030 | 0.4257036 | Drug_metabolism__cytochrome_P450_PATH_ko00982 | Control vs T2D     |
| 765  | 0.2486905 | 0.6495082 | Drug_metabolism__cytochrome_P450_PATH_ko00982 | Control vs T2D     |
| 177  | 0.6656882 | 0.7652037 | Drug_metabolism__cytochrome_P450_PATH_ko00982 | Control vs T1D     |

# Drug\_metabolism\_\_cytochrome\_P450\_

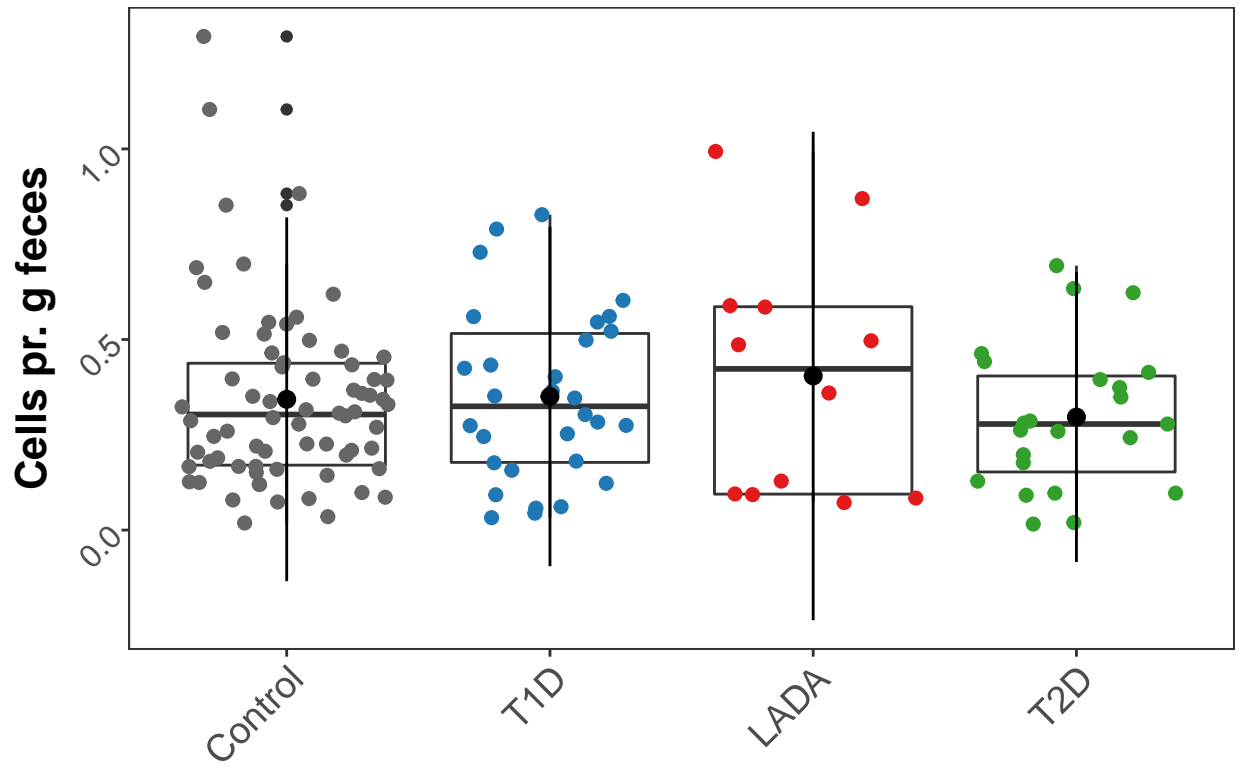

|      | pvalue    | padj      | Genus                                      | compare         |
|------|-----------|-----------|--------------------------------------------|-----------------|
| 491  | 0.0188318 | 0.0493905 | Starch_and_sucrose_metabolism_PATH_ko00500 | LADA vs Control |
| 295  | 0.0120571 | 0.0629443 | Starch_and_sucrose_metabolism_PATH_ko00500 | Control vs T2D  |
| 99   | 0.0177848 | 0.2904843 | Starch_and_sucrose_metabolism_PATH_ko00500 | Control vs T1D  |
| 883  | 0.5258331 | 0.6550234 | Starch_and_sucrose_metabolism_PATH_ko00500 | LADA vs T1D     |
| 687  | 0.7558444 | 0.8322782 | Starch_and_sucrose_metabolism_PATH_ko00500 | T1D vs T2D      |
| 1079 | 0.7140096 | 0.9028767 | Starch_and_sucrose_metabolism_PATH_ko00500 | LADA vs T2D     |

# Starch\_and\_sucrose\_metabolism\_PATH

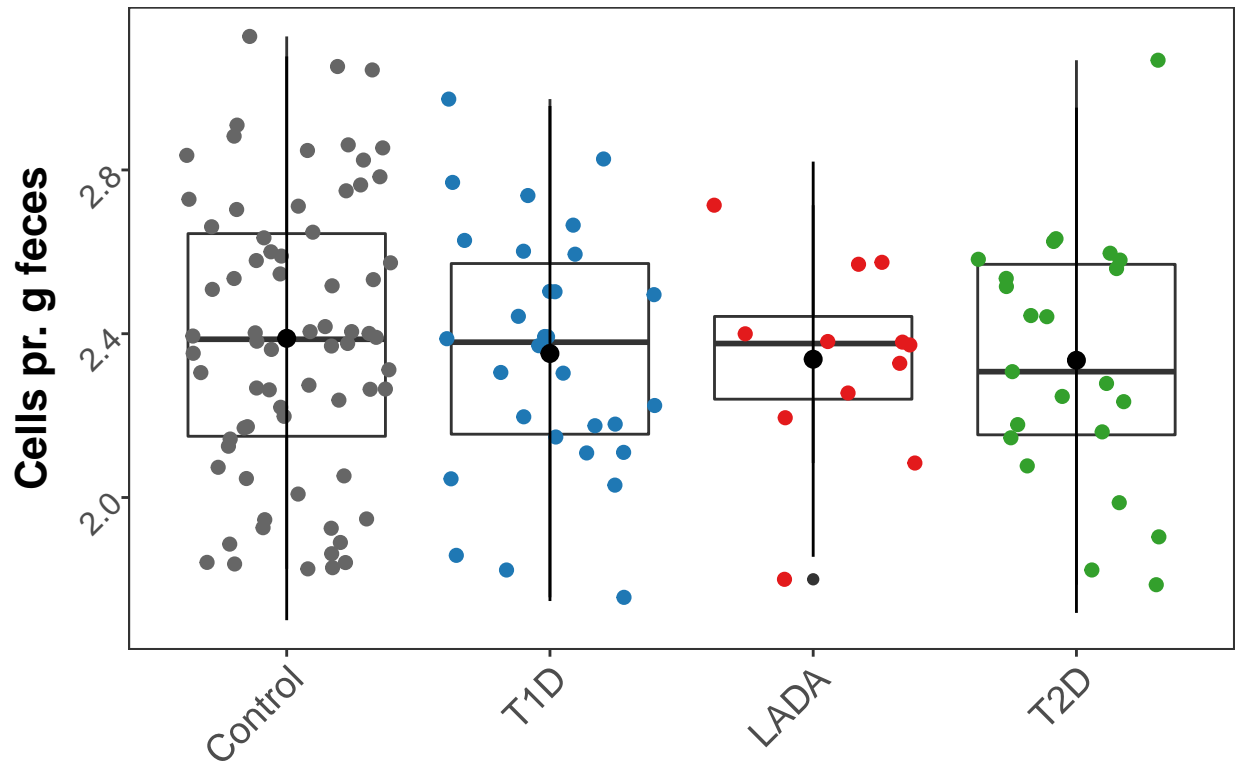

|     | pvalue    | padj      | Genus                          | compare         |
|-----|-----------|-----------|--------------------------------|-----------------|
| 408 | 0.0188994 | 0.0493905 | Autophagy___yeast_PATH_ko04138 | LADA vs Control |
| 212 | 0.2593734 | 0.3292047 | Autophagy___yeast_PATH_ko04138 | Control vs T2D  |
| 800 | 0.2394439 | 0.3950690 | Autophagy___yeast_PATH_ko04138 | LADA vs T1D     |
| 16  | 0.1285572 | 0.4612224 | Autophagy___yeast_PATH_ko04138 | Control vs T1D  |
| 996 | 0.1941252 | 0.8415375 | Autophagy___yeast_PATH_ko04138 | LADA vs T2D     |
| 604 | 0.8269710 | 0.8857176 | Autophagy___yeast_PATH_ko04138 | T1D vs T2D      |



# Autophagy\_\_\_yeast\_PATH\_ko04138

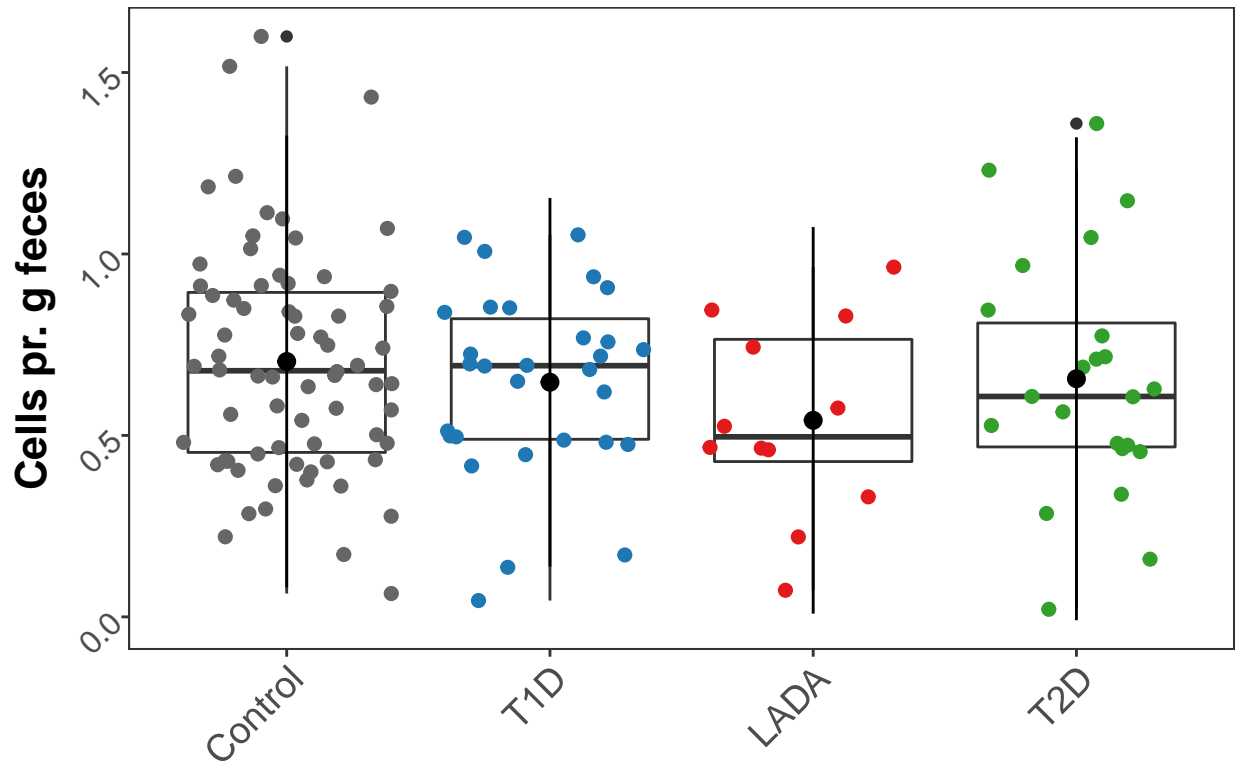

|      | pvalue    | padj      | Genus                                                     | compare |
|------|-----------|-----------|-----------------------------------------------------------|---------|
| 477  | 0.0191645 | 0.0494243 | Amino_sugar_and_nucleotide_sugar_metabolism_PATHLADA00520 | Control |
| 281  | 0.0204882 | 0.0661577 | Amino_sugar_and_nucleotide_sugar_metabolism_PATHLADA00520 | T2D     |
| 869  | 0.1941789 | 0.3597318 | Amino_sugar_and_nucleotide_sugar_metabolism_PATHLADA00520 | T1D     |
| 85   | 0.1863352 | 0.4762288 | Amino_sugar_and_nucleotide_sugar_metabolism_PATHLADA00520 | T1D     |
| 673  | 0.3325322 | 0.6495082 | Amino_sugar_and_nucleotide_sugar_metabolism_PATHLADA00520 | T2D     |
| 1065 | 0.6233342 | 0.8841442 | Amino_sugar_and_nucleotide_sugar_metabolism_PATHLADA00520 | T2D     |

# Amino\_sugar\_and\_nucleotide\_sugar\_m

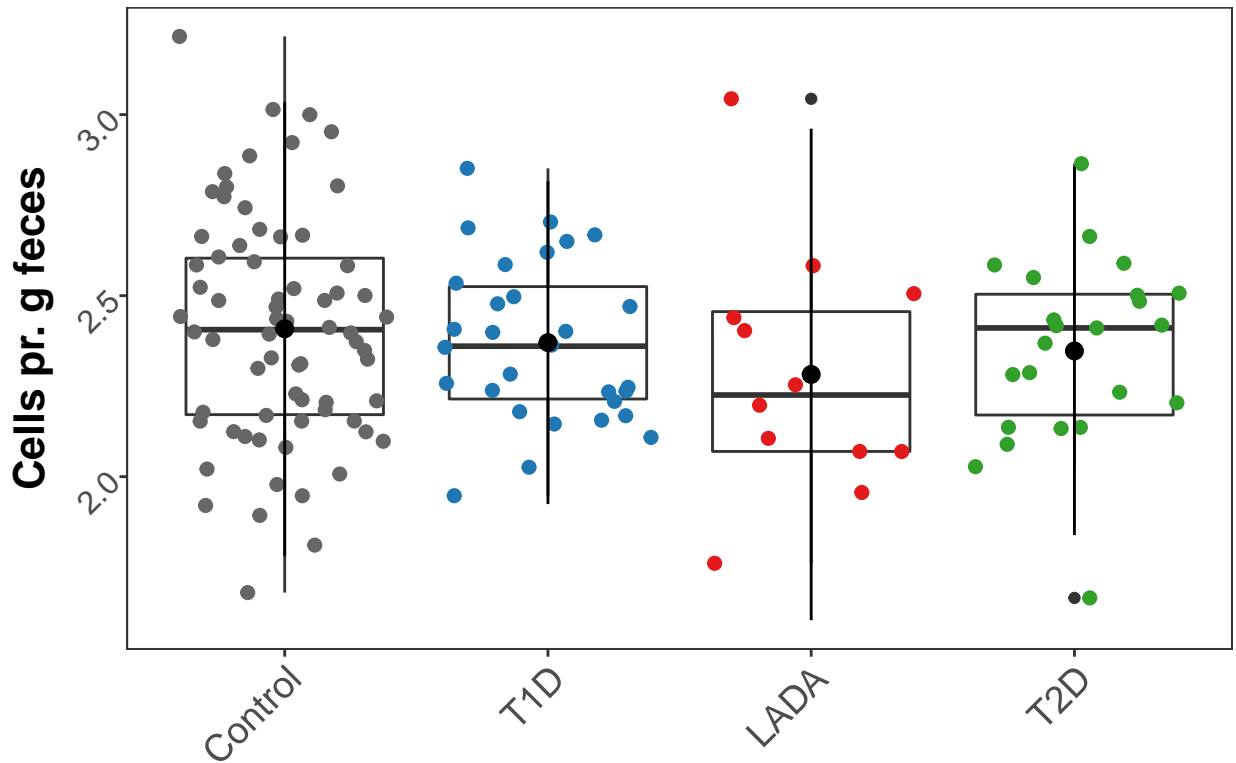

|      | pvalue    | padj      | Genus                            | compare         |
|------|-----------|-----------|----------------------------------|-----------------|
| 490  | 0.0204551 | 0.0517856 | Pyruvate_metabolism_PATH_ko00620 | LADA vs Control |
| 294  | 0.0222761 | 0.0676342 | Pyruvate_metabolism_PATH_ko00620 | Control vs T2D  |
| 882  | 0.0687580 | 0.2312928 | Pyruvate_metabolism_PATH_ko00620 | LADA vs T1D     |
| 686  | 0.1069516 | 0.6495082 | Pyruvate_metabolism_PATH_ko00620 | T1D vs T2D      |
| 98   | 0.6383849 | 0.7537556 | Pyruvate_metabolism_PATH_ko00620 | Control vs T1D  |
| 1078 | 0.6233769 | 0.8841442 | Pyruvate_metabolism_PATH_ko00620 | LADA vs T2D     |

# Pyruvate\_metabolism\_PATH\_ko00620

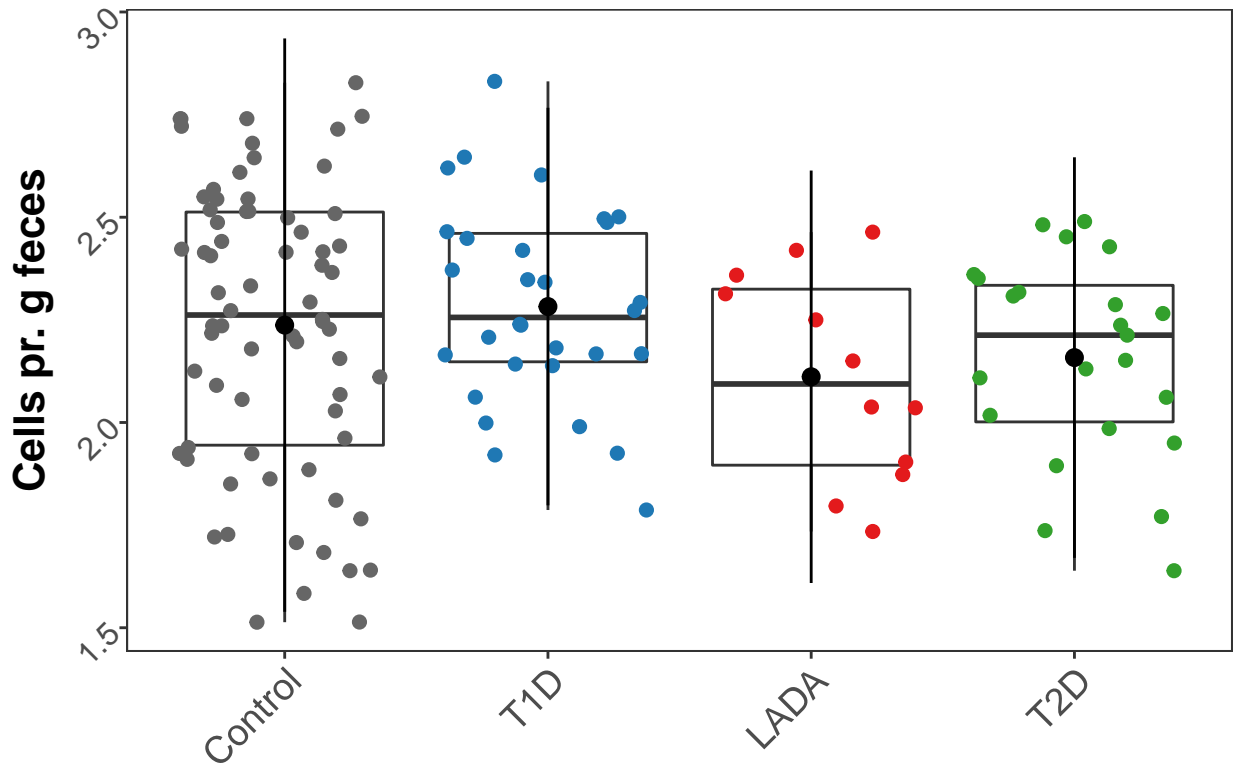

|      | pvalue    | padj      | Genus                                                  | compare                 |
|------|-----------|-----------|--------------------------------------------------------|-------------------------|
| 476  | 0.0206085 | 0.0517856 | Tropane__piperidine_and_pyridine_alkaloid_biosynthesis | HADA ko00960<br>Control |
| 280  | 0.0594688 | 0.0981236 | Tropane__piperidine_and_pyridine_alkaloid_biosynthesis | HADA ko00960<br>T2D     |
| 868  | 0.1806223 | 0.3554025 | Tropane__piperidine_and_pyridine_alkaloid_biosynthesis | HADA ko00960<br>T1D     |
| 84   | 0.2228203 | 0.4786856 | Tropane__piperidine_and_pyridine_alkaloid_biosynthesis | HADA ko00960<br>T1D     |
| 672  | 0.4999617 | 0.6852622 | Tropane__piperidine_and_pyridine_alkaloid_biosynthesis | PATHvsT2D ko00960       |
| 1064 | 0.4477410 | 0.8415375 | Tropane__piperidine_and_pyridine_alkaloid_biosynthesis | HADA ko00960<br>T2D     |

# Tropane\_piperidine\_and\_pyridine\_alkal

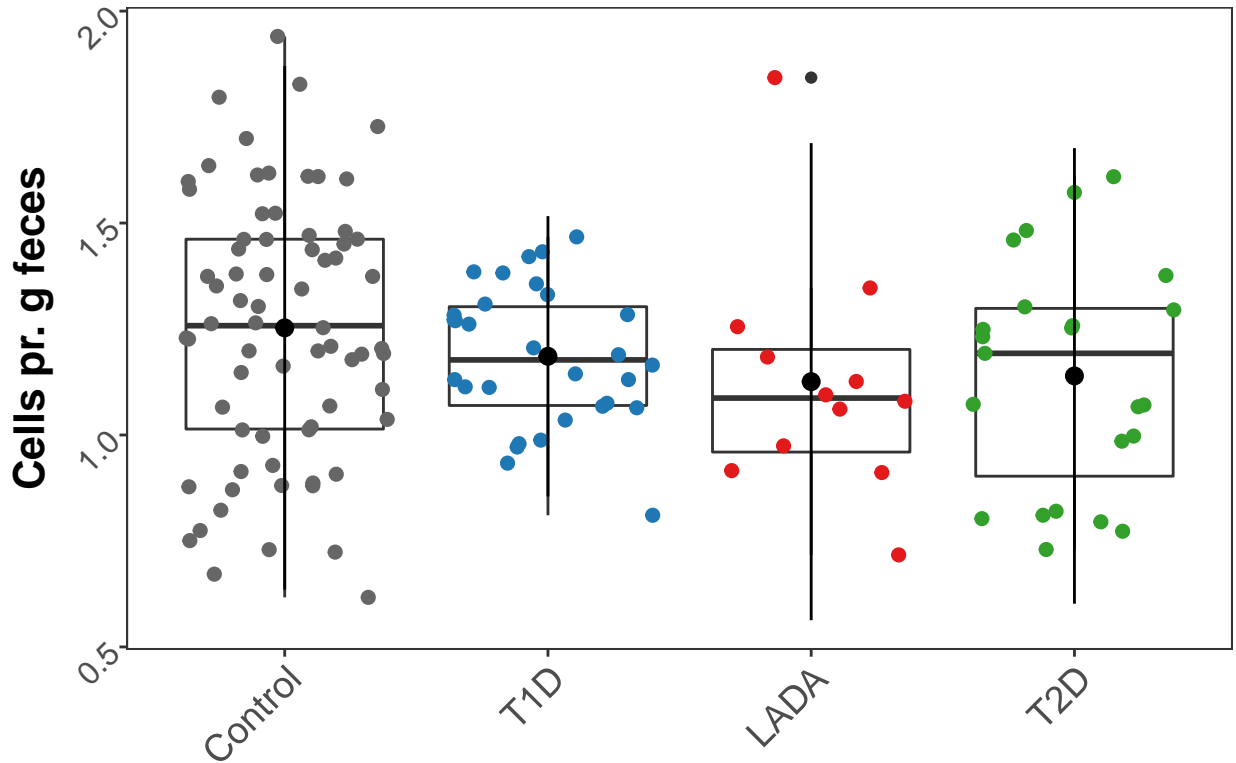

|      | pvalue    | padj      | Genus                                                    | compare         |
|------|-----------|-----------|----------------------------------------------------------|-----------------|
| 550  | 0.0213722 | 0.0530248 | Biosynthesis_of_vancomycin_group_antibiotics_PATH_k01055 | LADA vs Control |
| 942  | 0.1247153 | 0.2777750 | Biosynthesis_of_vancomycin_group_antibiotics_PATH_k01055 | LADA vs T1D     |
| 354  | 0.2183312 | 0.2859099 | Biosynthesis_of_vancomycin_group_antibiotics_PATH_k01055 | Control vs T2D  |
| 158  | 0.3724298 | 0.5530018 | Biosynthesis_of_vancomycin_group_antibiotics_PATH_k01055 | Control vs T1D  |
| 746  | 0.7149550 | 0.8007496 | Biosynthesis_of_vancomycin_group_antibiotics_PATH_k01055 | T1D vs T2D      |
| 1138 | 0.2346910 | 0.8415375 | Biosynthesis_of_vancomycin_group_antibiotics_PATH_k01055 | LADA vs T2D     |

# Biosynthesis\_of\_vancomycin\_group\_an

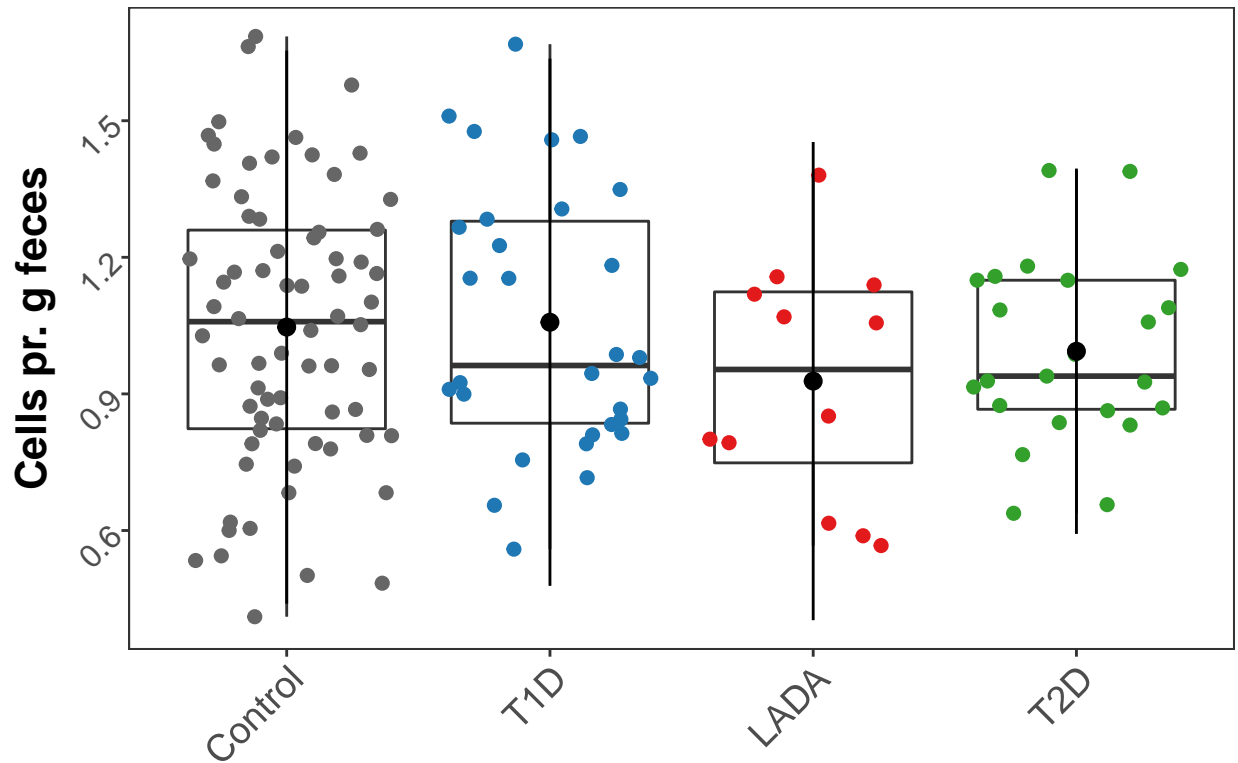

|      | pvalue    | padj      | Genus                                             | compare         |
|------|-----------|-----------|---------------------------------------------------|-----------------|
| 533  | 0.0226272 | 0.0549700 | Porphyrin_and_chlorophyll_metabolism_PATH_ko00860 | LADA vs Control |
| 337  | 0.0561576 | 0.0945510 | Porphyrin_and_chlorophyll_metabolism_PATH_ko00860 | Control vs T2D  |
| 925  | 0.0747015 | 0.2321553 | Porphyrin_and_chlorophyll_metabolism_PATH_ko00860 | LADA vs T1D     |
| 729  | 0.1995785 | 0.6495082 | Porphyrin_and_chlorophyll_metabolism_PATH_ko00860 | LADA vs T2D     |
| 141  | 0.6353121 | 0.7537556 | Porphyrin_and_chlorophyll_metabolism_PATH_ko00860 | Control vs T1D  |
| 1121 | 0.4769734 | 0.8415375 | Porphyrin_and_chlorophyll_metabolism_PATH_ko00860 | LADA vs T2D     |

# Porphyrin\_and\_chlorophyll\_metabolism

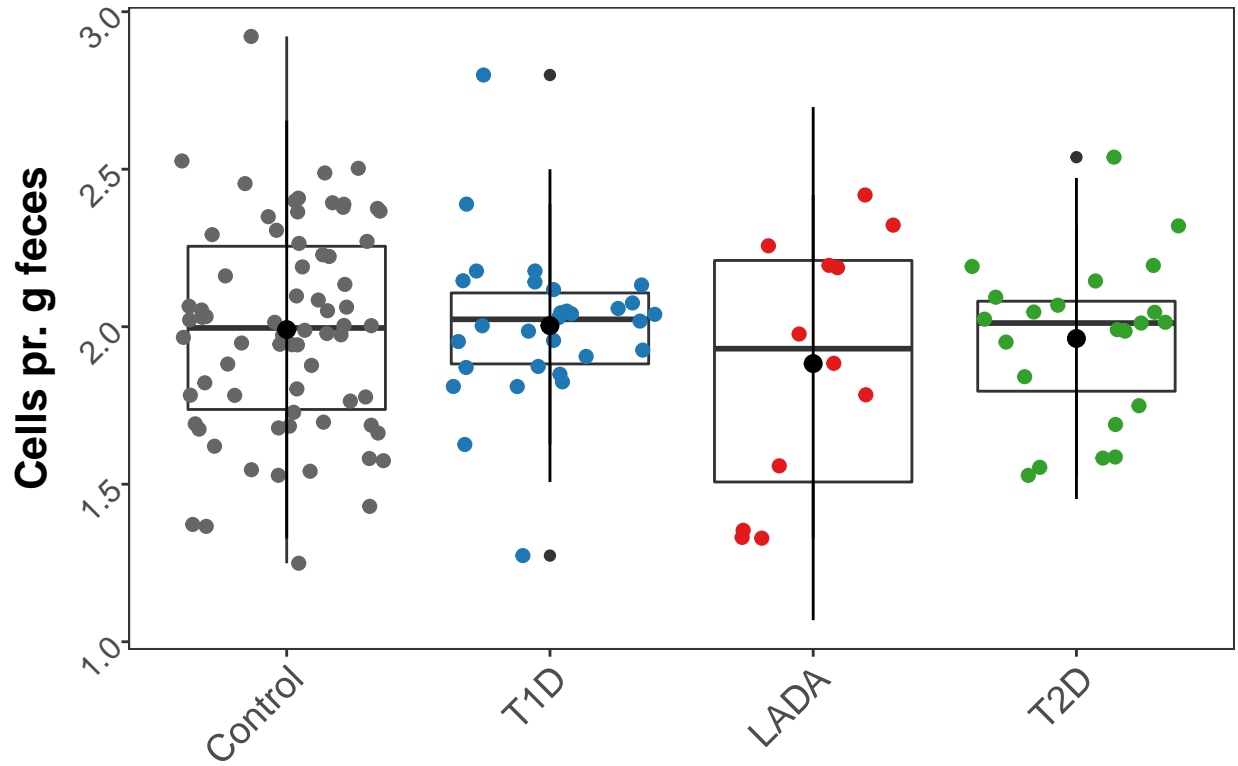

|      | pvalue    | padj      | Genus                                | compare         |
|------|-----------|-----------|--------------------------------------|-----------------|
| 516  | 0.0227172 | 0.0549700 | Fatty_acid_biosynthesis_PATH_ko00061 | LADA vs Control |
| 320  | 0.0227070 | 0.0676342 | Fatty_acid_biosynthesis_PATH_ko00061 | Control vs T2D  |
| 908  | 0.1848778 | 0.3554025 | Fatty_acid_biosynthesis_PATH_ko00061 | LADA vs T1D     |
| 124  | 0.2354304 | 0.4839499 | Fatty_acid_biosynthesis_PATH_ko00061 | Control vs T1D  |
| 712  | 0.2976214 | 0.6495082 | Fatty_acid_biosynthesis_PATH_ko00061 | T1D vs T2D      |
| 1104 | 0.6447043 | 0.8841442 | Fatty_acid_biosynthesis_PATH_ko00061 | LADA vs T2D     |

# Fatty\_acid\_biosynthesis\_PATH\_ko00061

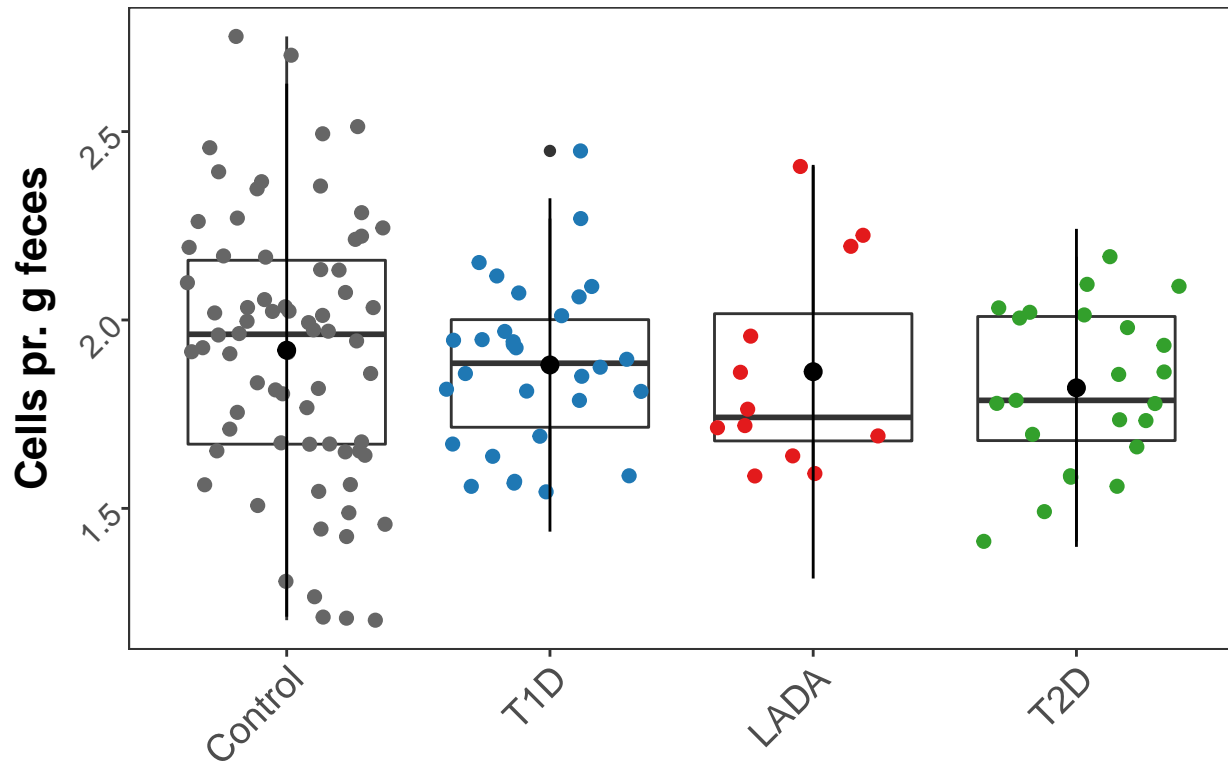

|      | pvalue    | padj      | Genus                      | compare         |
|------|-----------|-----------|----------------------------|-----------------|
| 446  | 0.0230254 | 0.0550363 | RNA_transport_PATH_ko03013 | LADA vs Control |
| 838  | 0.0016859 | 0.0632892 | RNA_transport_PATH_ko03013 | LADA vs T1D     |
| 250  | 0.2995526 | 0.3744407 | RNA_transport_PATH_ko03013 | Control vs T2D  |
| 54   | 0.0966328 | 0.4612224 | RNA_transport_PATH_ko03013 | Control vs T1D  |
| 642  | 0.0272615 | 0.6495082 | RNA_transport_PATH_ko03013 | T1D vs T2D      |
| 1034 | 0.1956129 | 0.8415375 | RNA_transport_PATH_ko03013 | LADA vs T2D     |

# RNA\_transport\_PATH\_ko03013

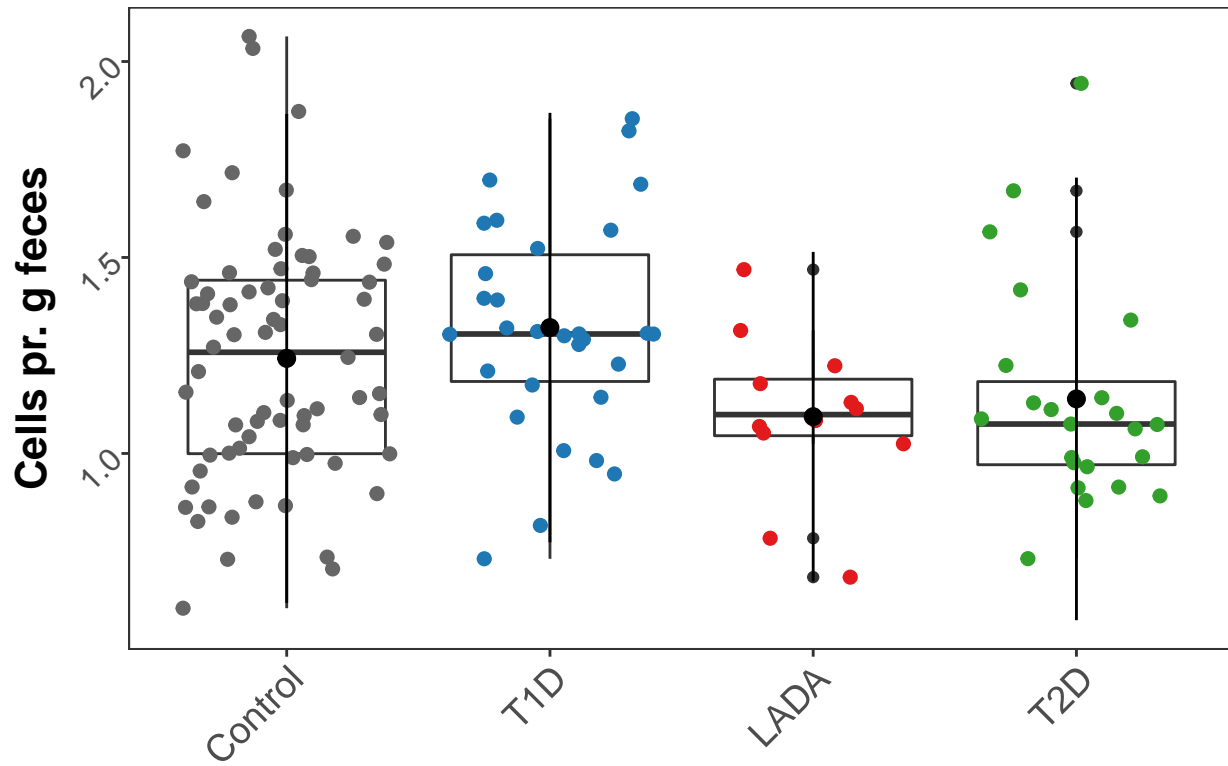

|      | pvalue    | padj      | Genus                 | compare         |
|------|-----------|-----------|-----------------------|-----------------|
| 586  | 0.0240073 | 0.0566919 | Fatty_acid_metabolism | LADA vs Control |
| 390  | 0.0213993 | 0.0666206 | Fatty_acid_metabolism | Control vs T2D  |
| 978  | 0.2019922 | 0.3597318 | Fatty_acid_metabolism | LADA vs T1D     |
| 194  | 0.2170335 | 0.4786856 | Fatty_acid_metabolism | Control vs T1D  |
| 782  | 0.3061560 | 0.6495082 | Fatty_acid_metabolism | T1D vs T2D      |
| 1174 | 0.6691103 | 0.8952178 | Fatty_acid_metabolism | LADA vs T2D     |



# Fatty\_acid\_metabolism

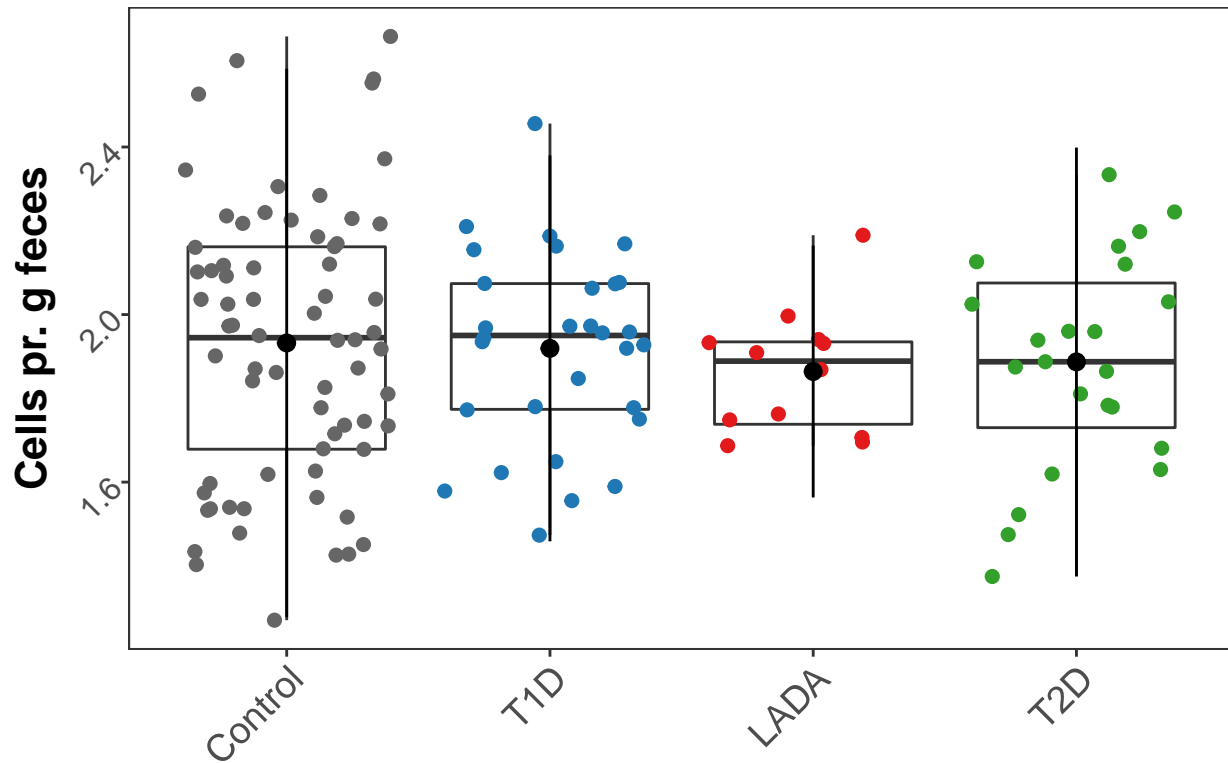

|      | pvalue    | padj      | Genus                                       | compare         |
|------|-----------|-----------|---------------------------------------------|-----------------|
| 521  | 0.0245535 | 0.0569158 | Primary_bile_acid_biosynthesis_PATH_ko00120 | LADA vs Control |
| 325  | 0.1162234 | 0.1682181 | Primary_bile_acid_biosynthesis_PATH_ko00120 | Control vs T2D  |
| 129  | 0.0568772 | 0.3992571 | Primary_bile_acid_biosynthesis_PATH_ko00120 | Control vs T1D  |
| 913  | 0.4008845 | 0.5483058 | Primary_bile_acid_biosynthesis_PATH_ko00120 | LADA vs T1D     |
| 1109 | 0.3615058 | 0.8415375 | Primary_bile_acid_biosynthesis_PATH_ko00120 | LADA vs T2D     |
| 717  | 0.8909005 | 0.9047487 | Primary_bile_acid_biosynthesis_PATH_ko00120 | T1D vs T2D      |

# Primary\_bile\_acid\_biosynthesis\_PATH\_I

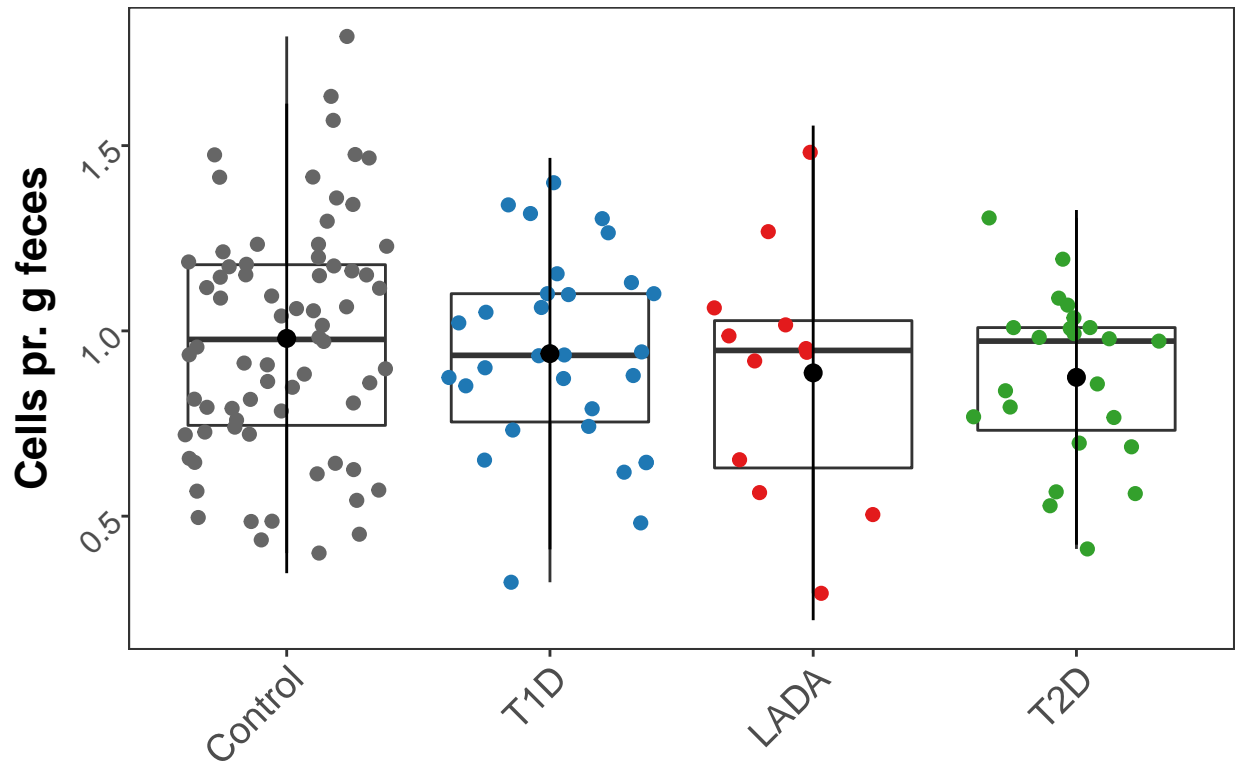

|      | pvalue    | padj      | Genus                                      | compare         |
|------|-----------|-----------|--------------------------------------------|-----------------|
| 414  | 0.0246829 | 0.0569158 | Phosphotransferase_system_PTS_PATH_ko02060 | LADA vs Control |
| 218  | 0.0056557 | 0.0629443 | Phosphotransferase_system_PTS_PATH_ko02060 | Control vs T2D  |
| 806  | 0.1854911 | 0.3554025 | Phosphotransferase_system_PTS_PATH_ko02060 | LADA vs T1D     |
| 22   | 0.2527021 | 0.4839499 | Phosphotransferase_system_PTS_PATH_ko02060 | Control vs T1D  |
| 610  | 0.1338708 | 0.6495082 | Phosphotransferase_system_PTS_PATH_ko02060 | T1D vs T2D      |
| 1002 | 0.9177048 | 0.9828969 | Phosphotransferase_system_PTS_PATH_ko02060 | LADA vs T2D     |

# Phosphotransferase\_system\_PTS\_PA'

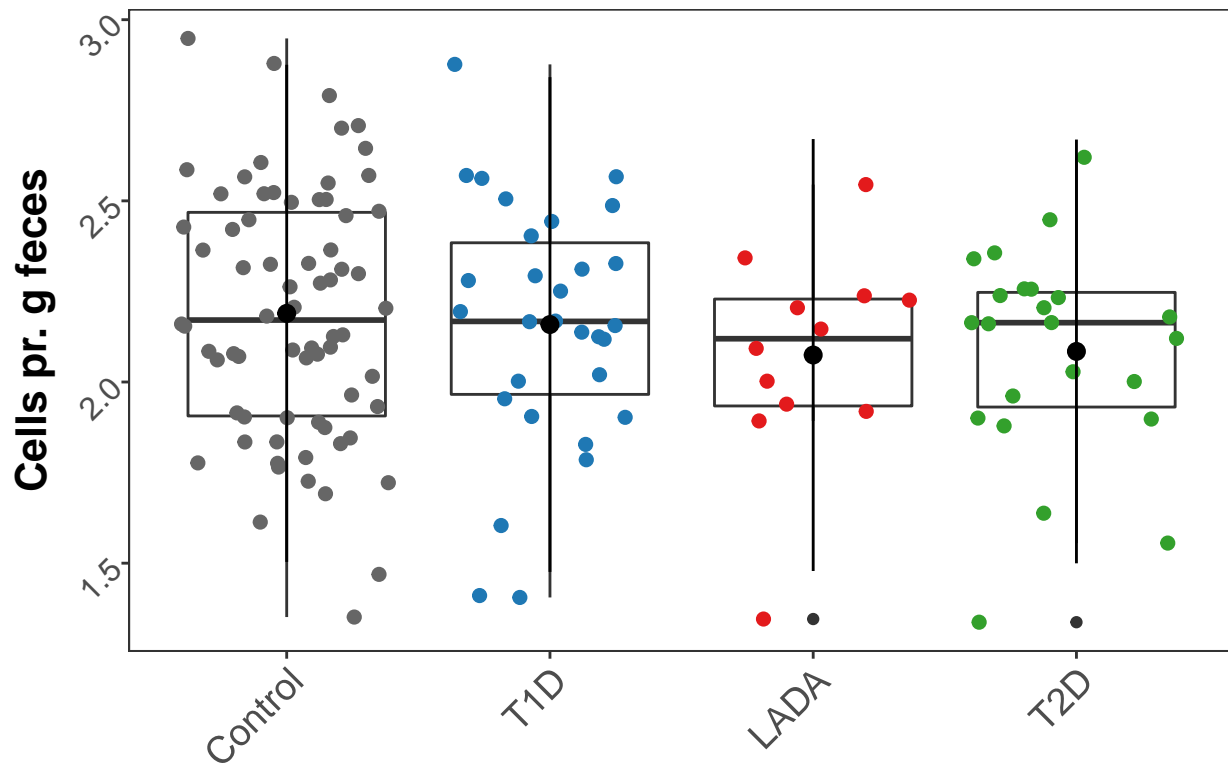

|      | pvalue    | padj      | Genus                                | compare         |
|------|-----------|-----------|--------------------------------------|-----------------|
| 539  | 0.0259727 | 0.0574628 | beta_Alanine_metabolism_PATH_ko00410 | LADA vs Control |
| 343  | 0.0123800 | 0.0629443 | beta_Alanine_metabolism_PATH_ko00410 | Control vs T2D  |
| 931  | 0.1867676 | 0.3554025 | beta_Alanine_metabolism_PATH_ko00410 | LADA vs T1D     |
| 147  | 0.2620385 | 0.4839499 | beta_Alanine_metabolism_PATH_ko00410 | Control vs T1D  |
| 735  | 0.1984936 | 0.6495082 | beta_Alanine_metabolism_PATH_ko00410 | T1D vs T2D      |
| 1127 | 0.7905944 | 0.9061784 | beta_Alanine_metabolism_PATH_ko00410 | LADA vs T2D     |

# beta\_Alanine\_metabolism\_PATH\_ko0041

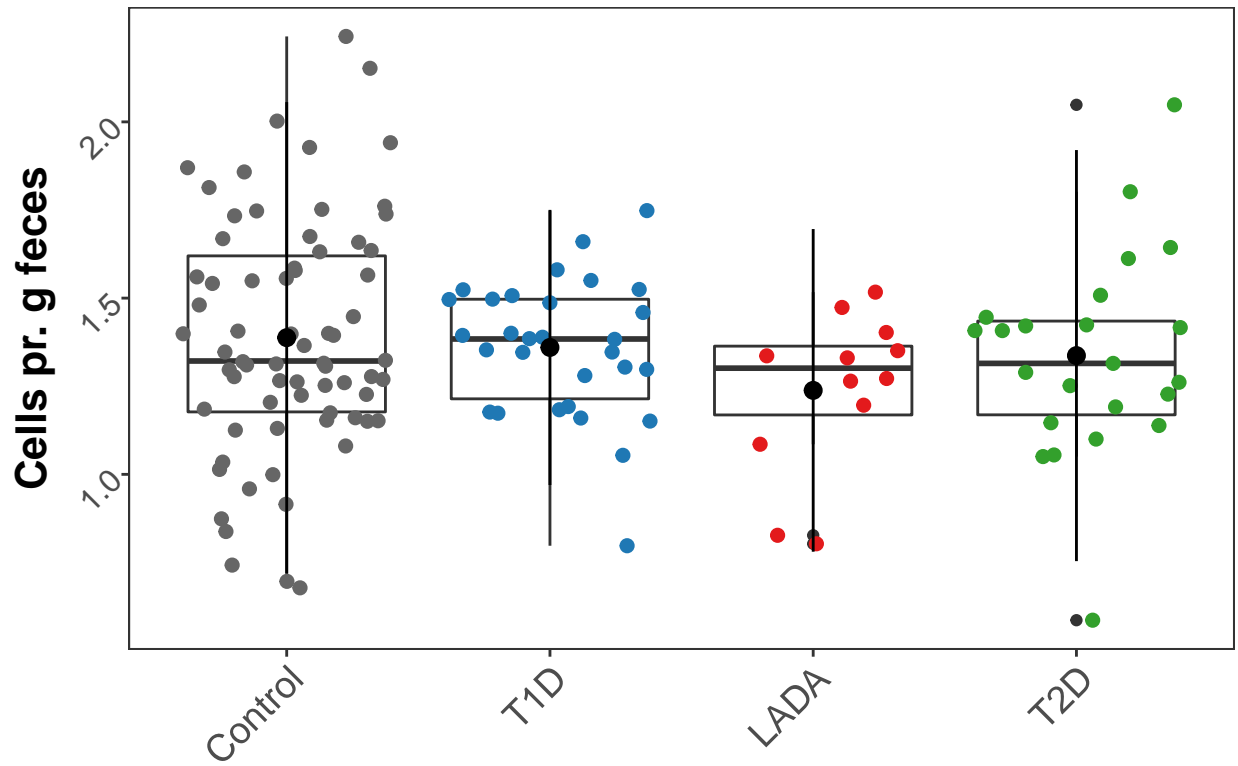

|      | pvalue    | padj      | Genus                             | compare         |
|------|-----------|-----------|-----------------------------------|-----------------|
| 479  | 0.0262357 | 0.0574628 | Butanoate_metabolism_PATH_ko00650 | LADA vs Control |
| 283  | 0.0283702 | 0.0676342 | Butanoate_metabolism_PATH_ko00650 | Control vs T2D  |
| 871  | 0.0970624 | 0.2458003 | Butanoate_metabolism_PATH_ko00650 | LADA vs T1D     |
| 675  | 0.1498178 | 0.6495082 | Butanoate_metabolism_PATH_ko00650 | T1D vs T2D      |
| 87   | 0.5583668 | 0.6970694 | Butanoate_metabolism_PATH_ko00650 | Control vs T1D  |
| 1067 | 0.6378868 | 0.8841442 | Butanoate_metabolism_PATH_ko00650 | LADA vs T2D     |

# Butanoate\_metabolism\_PATH\_ko00650

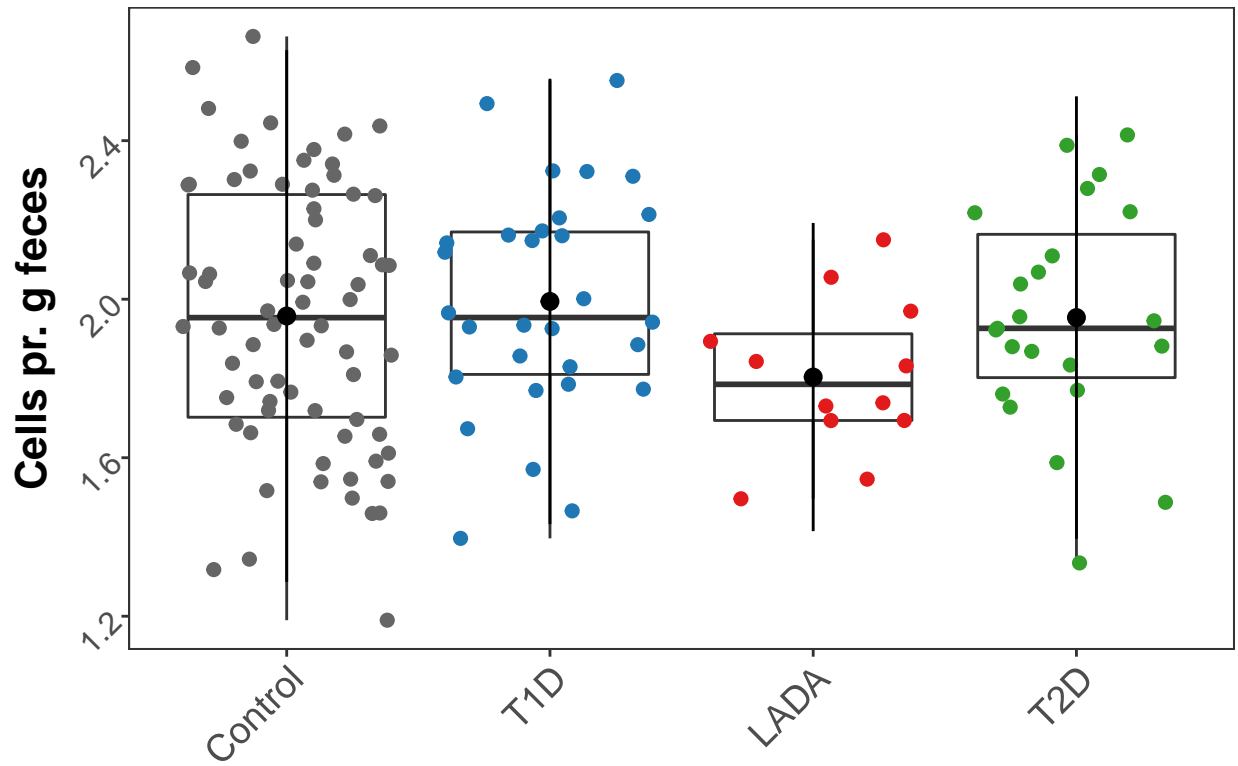

|      | pvalue    | padj      | Genus                                                | compare            |
|------|-----------|-----------|------------------------------------------------------|--------------------|
| 485  | 0.0263113 | 0.0574628 | Glyoxylate_and_dicarboxylate_metabolism_PATH_ko00650 | Control vs Control |
| 289  | 0.0433535 | 0.0794814 | Glyoxylate_and_dicarboxylate_metabolism_PATH_ko00650 | Control vs T2D     |
| 877  | 0.2666769 | 0.4051834 | Glyoxylate_and_dicarboxylate_metabolism_PATH_ko00650 | Control vs T1D     |
| 93   | 0.1492374 | 0.4612224 | Glyoxylate_and_dicarboxylate_metabolism_PATH_ko00650 | Control vs T1D     |
| 681  | 0.5376224 | 0.6978411 | Glyoxylate_and_dicarboxylate_metabolism_PATH_ko00650 | Control vs T2D     |
| 1073 | 0.5581089 | 0.8681693 | Glyoxylate_and_dicarboxylate_metabolism_PATH_ko00650 | Control vs T2D     |

# Glyoxylate\_and\_dicarboxylate\_metabolis

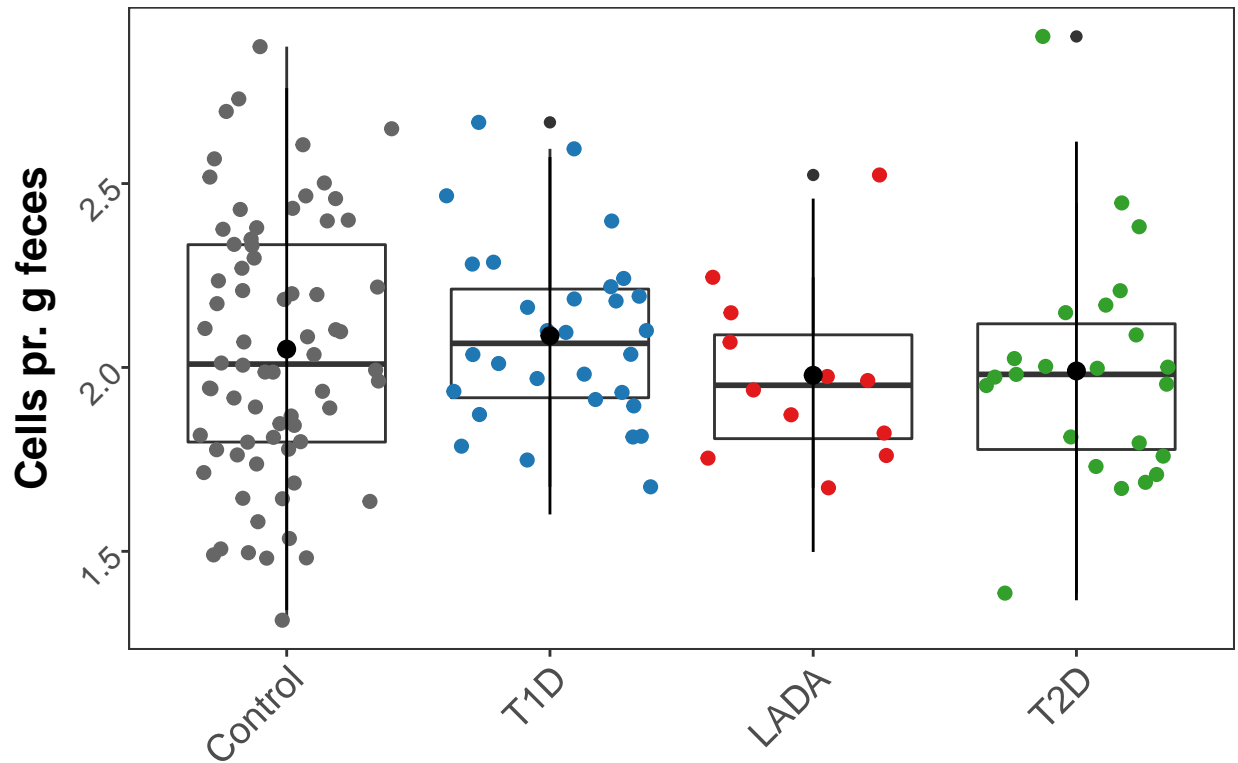

|      | pvalue    | padj      | Genus                                         | compare         |
|------|-----------|-----------|-----------------------------------------------|-----------------|
| 522  | 0.0266088 | 0.0574628 | Secondary_bile_acid_biosynthesis_PATH_ko00121 | LADA vs Control |
| 326  | 0.1186247 | 0.1702007 | Secondary_bile_acid_biosynthesis_PATH_ko00121 | Control vs T2D  |
| 130  | 0.0575187 | 0.3992571 | Secondary_bile_acid_biosynthesis_PATH_ko00121 | Control vs T1D  |
| 914  | 0.4152528 | 0.5574627 | Secondary_bile_acid_biosynthesis_PATH_ko00121 | LADA vs T1D     |
| 1110 | 0.3723443 | 0.8415375 | Secondary_bile_acid_biosynthesis_PATH_ko00121 | LADA vs T2D     |
| 718  | 0.8869271 | 0.9047487 | Secondary_bile_acid_biosynthesis_PATH_ko00121 | T1D vs T2D      |

# Secondary\_bile\_acid\_biosynthesis\_PATH

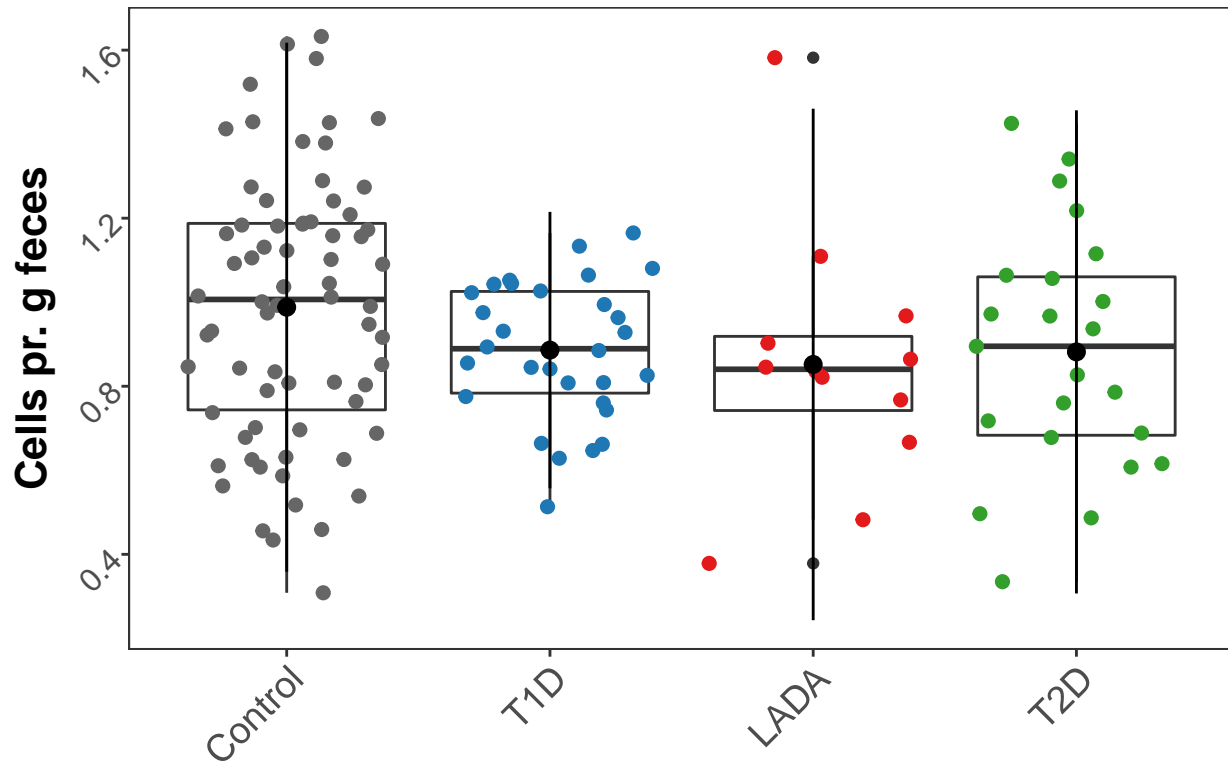

|      | pvalue    | padj      | Genus                            | compare         |
|------|-----------|-----------|----------------------------------|-----------------|
| 528  | 0.0269822 | 0.0574628 | Folate_biosynthesis_PATH_ko00790 | LADA vs Control |
| 332  | 0.0950507 | 0.1425761 | Folate_biosynthesis_PATH_ko00790 | Control vs T2D  |
| 920  | 0.0215652 | 0.2312928 | Folate_biosynthesis_PATH_ko00790 | LADA vs T1D     |
| 724  | 0.0740582 | 0.6495082 | Folate_biosynthesis_PATH_ko00790 | T1D vs T2D      |
| 136  | 0.6671496 | 0.7652037 | Folate_biosynthesis_PATH_ko00790 | Control vs T1D  |
| 1116 | 0.4156975 | 0.8415375 | Folate_biosynthesis_PATH_ko00790 | LADA vs T2D     |

# Folate\_biosynthesis\_PATH\_ko00790

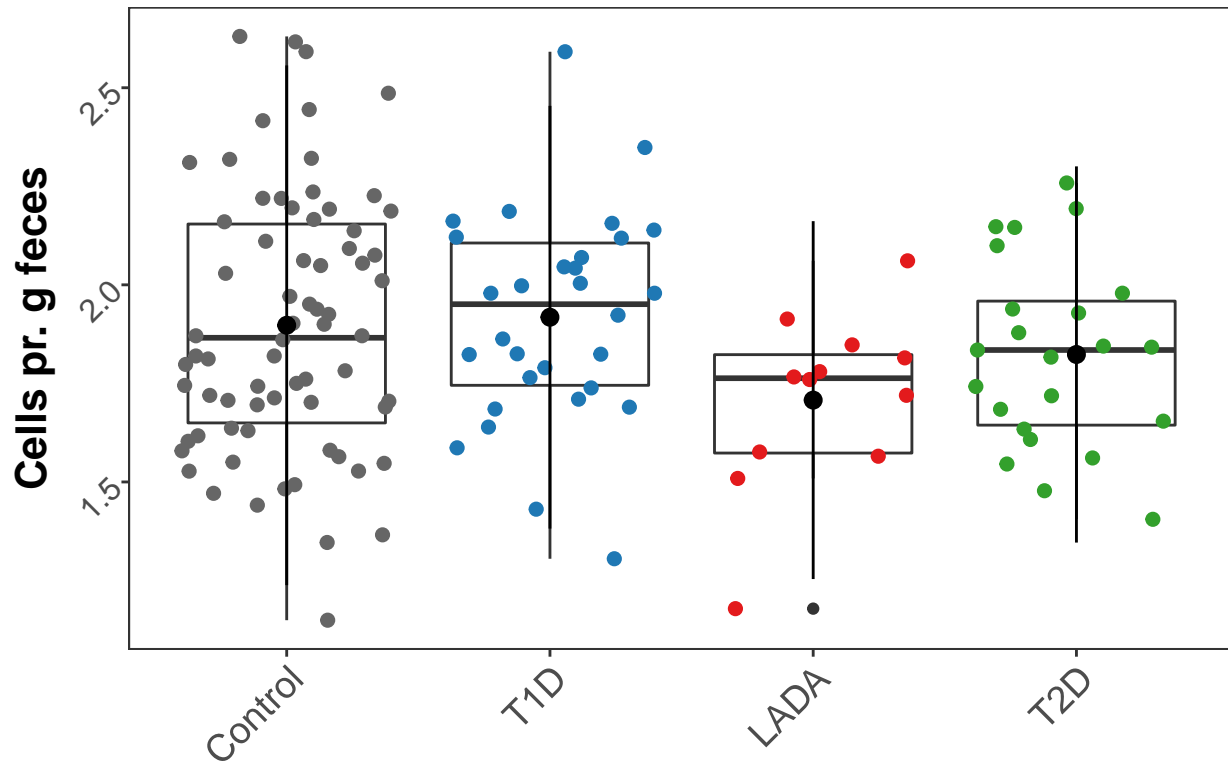

|      | pvalue    | padj      | Genus                            | compare         |
|------|-----------|-----------|----------------------------------|-----------------|
| 559  | 0.0272008 | 0.0574628 | Zeatin_biosynthesis_PATH_ko00908 | LADA vs Control |
| 363  | 0.0474387 | 0.0828378 | Zeatin_biosynthesis_PATH_ko00908 | Control vs T2D  |
| 951  | 0.2980140 | 0.4359011 | Zeatin_biosynthesis_PATH_ko00908 | LADA vs T1D     |
| 167  | 0.1252058 | 0.4612224 | Zeatin_biosynthesis_PATH_ko00908 | Control vs T1D  |
| 755  | 0.6087806 | 0.7461523 | Zeatin_biosynthesis_PATH_ko00908 | T1D vs T2D      |
| 1147 | 0.5485906 | 0.8601900 | Zeatin_biosynthesis_PATH_ko00908 | LADA vs T2D     |



# Zeatin\_biosynthesis\_PATH\_ko00908

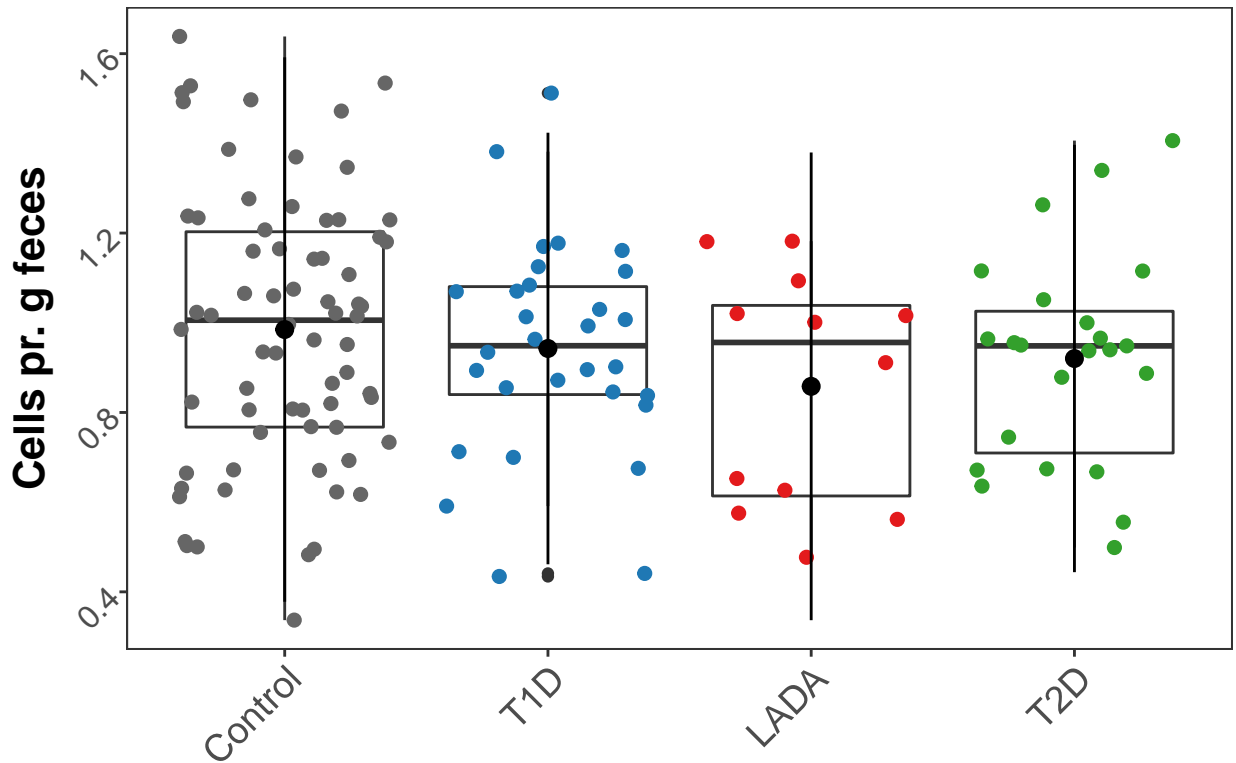

|      | pvalue    | padj      | Genus                                                | compare            |
|------|-----------|-----------|------------------------------------------------------|--------------------|
| 493  | 0.0275005 | 0.0574628 | Carbon_fixation_pathways_in_prokaryotes_PATH_ko00908 | Control vs Control |
| 297  | 0.0818376 | 0.1238826 | Carbon_fixation_pathways_in_prokaryotes_PATH_ko00908 | Control vs T2D     |
| 885  | 0.0427364 | 0.2312928 | Carbon_fixation_pathways_in_prokaryotes_PATH_ko00908 | Control vs T1D     |
| 689  | 0.1282056 | 0.6495082 | Carbon_fixation_pathways_in_prokaryotes_PATH_ko00908 | Control vs T2D     |
| 1081 | 0.4474880 | 0.8415375 | Carbon_fixation_pathways_in_prokaryotes_PATH_ko00908 | Control vs T2D     |
| 101  | 0.9876412 | 0.9876412 | Carbon_fixation_pathways_in_prokaryotes_PATH_ko00908 | Control vs T1D     |

# Carbon\_fixation\_pathways\_in\_prokaryot

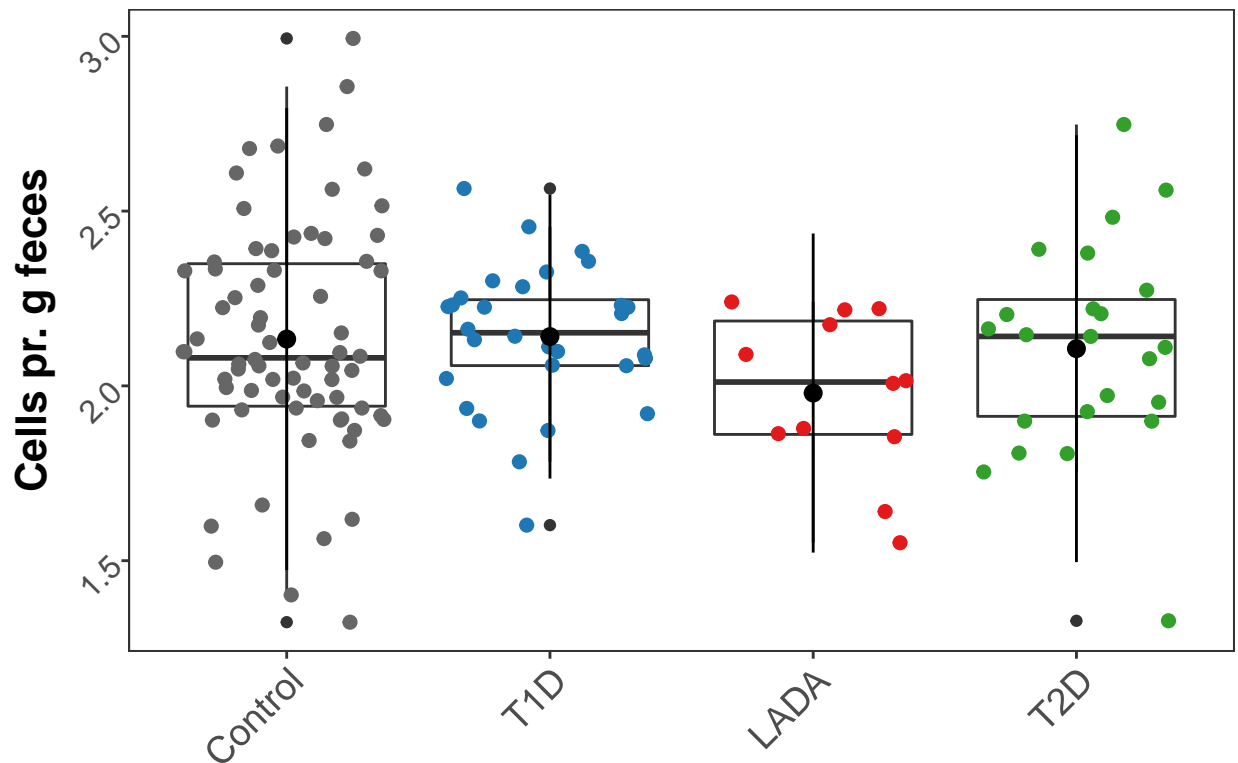

|      | pvalue    | padj      | Genus                                  | compare         |
|------|-----------|-----------|----------------------------------------|-----------------|
| 496  | 0.0275587 | 0.0574628 | Oxidative_phosphorylation_PATH_ko00190 | LADA vs Control |
| 300  | 0.0400861 | 0.0767378 | Oxidative_phosphorylation_PATH_ko00190 | Control vs T2D  |
| 888  | 0.1044541 | 0.2527532 | Oxidative_phosphorylation_PATH_ko00190 | LADA vs T1D     |
| 692  | 0.1945877 | 0.6495082 | Oxidative_phosphorylation_PATH_ko00190 | T1D vs T2D      |
| 104  | 0.5395052 | 0.6911308 | Oxidative_phosphorylation_PATH_ko00190 | Control vs T1D  |
| 1084 | 0.5838217 | 0.8682081 | Oxidative_phosphorylation_PATH_ko00190 | LADA vs T2D     |

# Oxidative\_phosphorylation\_PATH\_ko001

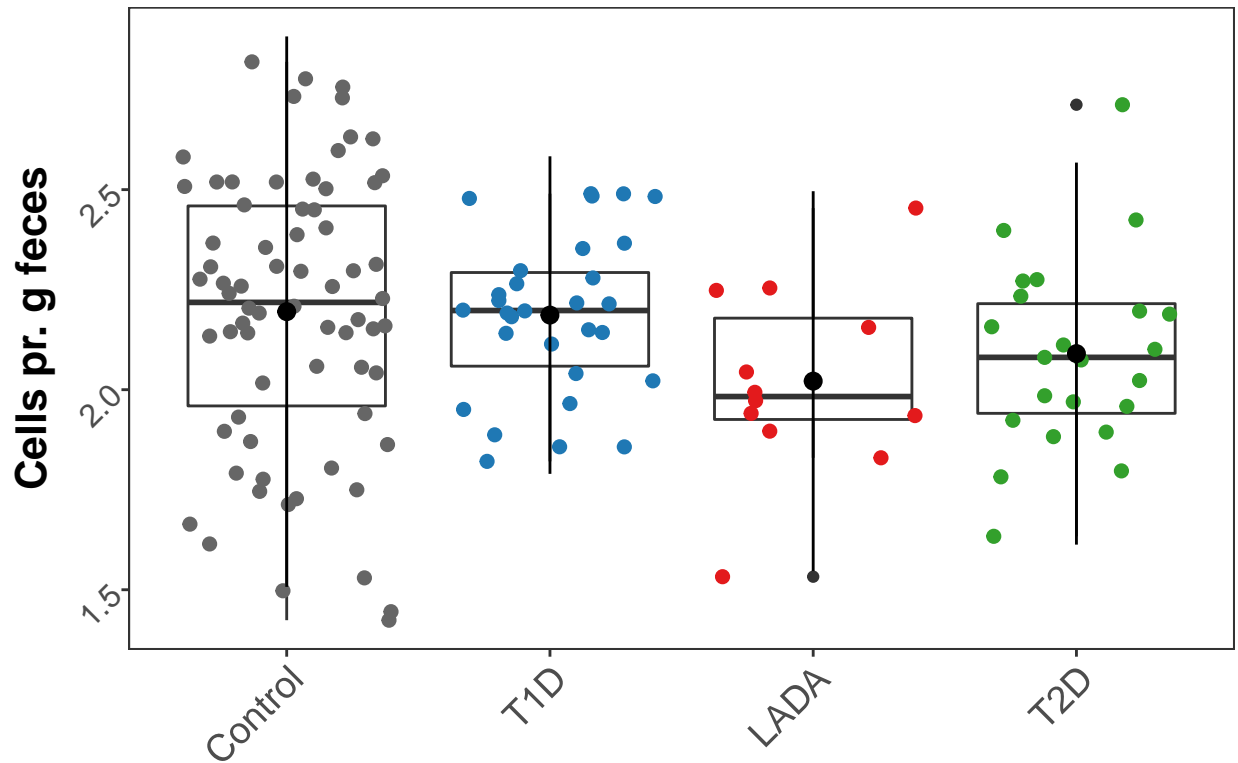

|      | pvalue    | padj      | Genus                                  | compare         |
|------|-----------|-----------|----------------------------------------|-----------------|
| 366  | 0.0041526 | 0.0629443 | Aminobenzoate_degradation_PATH_ko00627 | Control vs T2D  |
| 562  | 0.0881554 | 0.1350951 | Aminobenzoate_degradation_PATH_ko00627 | LADA vs Control |
| 954  | 0.2649059 | 0.4051834 | Aminobenzoate_degradation_PATH_ko00627 | LADA vs T1D     |
| 170  | 0.4861562 | 0.6482083 | Aminobenzoate_degradation_PATH_ko00627 | Control vs T1D  |
| 758  | 0.0527060 | 0.6495082 | Aminobenzoate_degradation_PATH_ko00627 | T1D vs T2D      |
| 1150 | 0.6610626 | 0.8952178 | Aminobenzoate_degradation_PATH_ko00627 | LADA vs T2D     |

# Aminobenzoate\_degradation\_PATH\_ko0

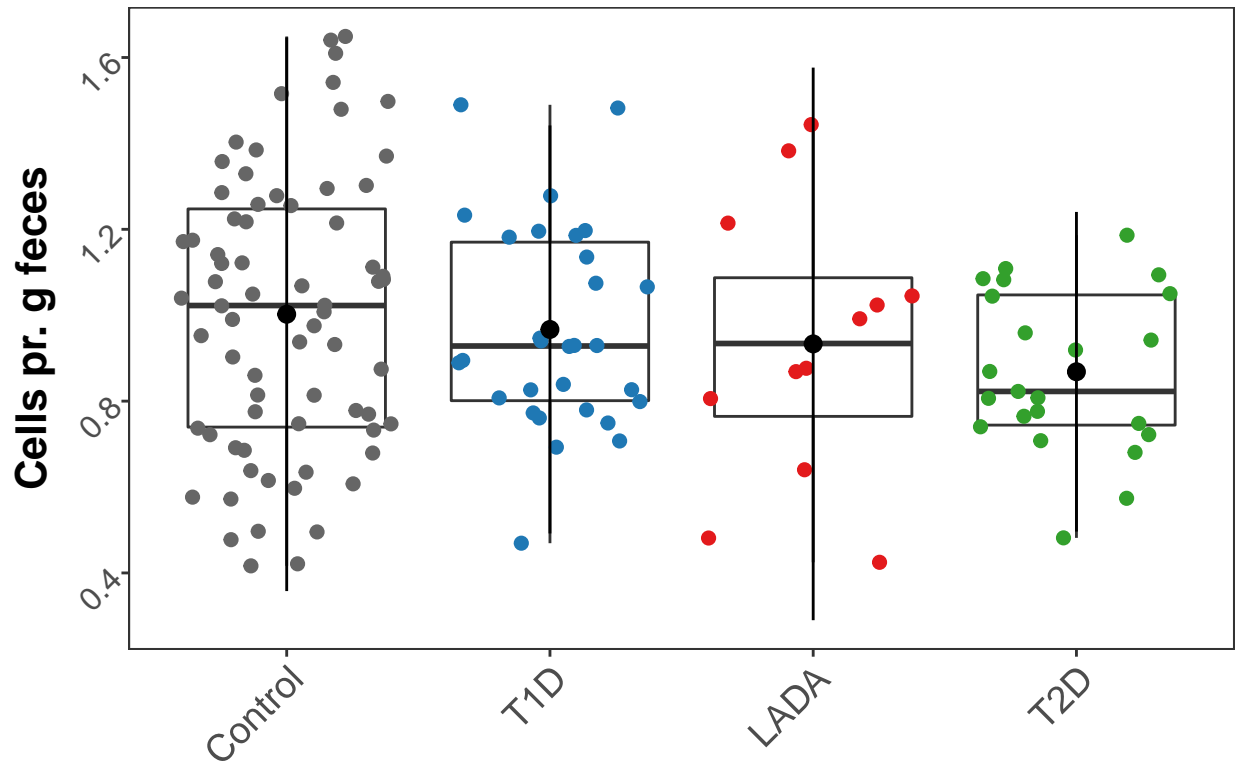

|      | pvalue    | padj      | Genus                             | compare         |
|------|-----------|-----------|-----------------------------------|-----------------|
| 230  | 0.0045253 | 0.0629443 | Two_component_system_PATH_ko02020 | Control vs T2D  |
| 426  | 0.0483705 | 0.0831633 | Two_component_system_PATH_ko02020 | LADA vs Control |
| 34   | 0.0030105 | 0.1382121 | Two_component_system_PATH_ko02020 | Control vs T1D  |
| 622  | 0.8996383 | 0.9089129 | Two_component_system_PATH_ko02020 | T1D vs T2D      |
| 1014 | 0.8539672 | 0.9483589 | Two_component_system_PATH_ko02020 | LADA vs T2D     |
| 818  | 0.9286360 | 0.9691189 | Two_component_system_PATH_ko02020 | LADA vs T1D     |

## Two\_component\_system\_PATH\_ko02020

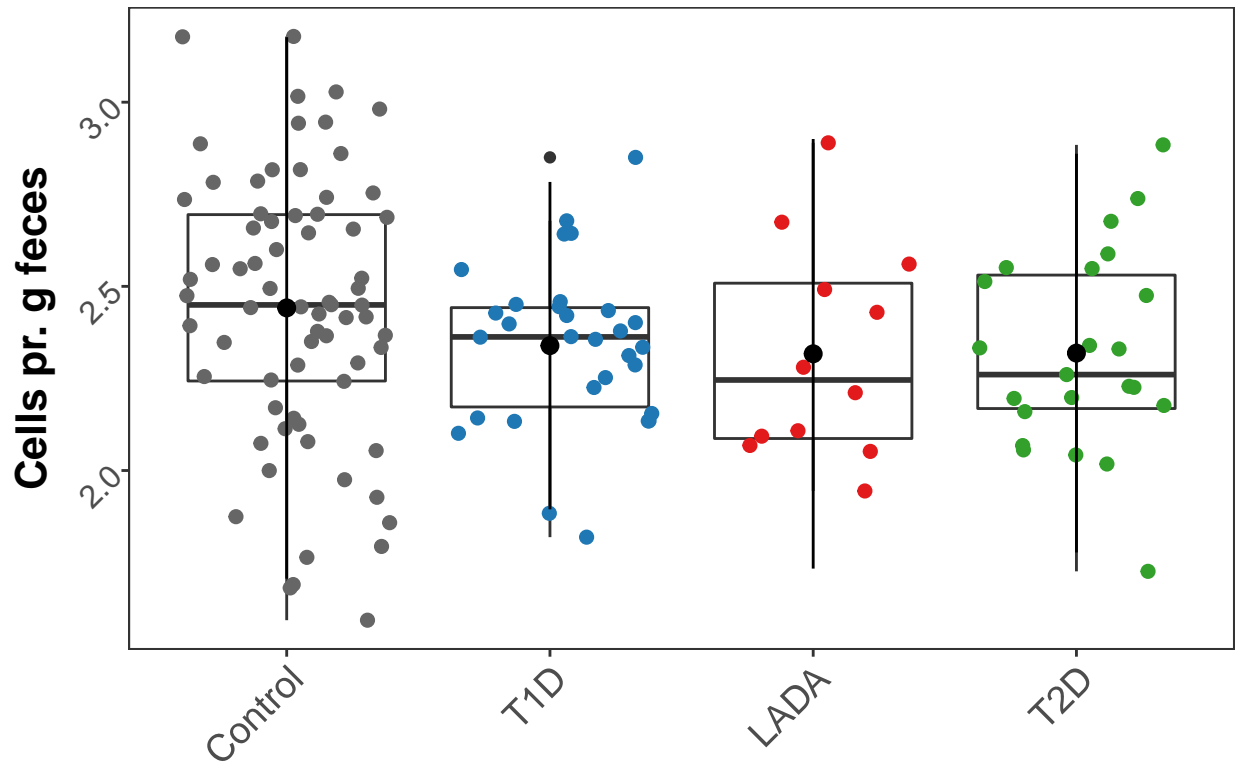

|     | pvalue    | padj      | Genus                                            | compare         |
|-----|-----------|-----------|--------------------------------------------------|-----------------|
| 207 | 0.0046159 | 0.0629443 | Biofilm_formation__Escherichia_coli_PATH_ko02020 | Control vs T2D  |
| 11  | 0.0034702 | 0.1382121 | Biofilm_formation__Escherichia_coli_PATH_ko02020 | Control vs T1D  |
| 403 | 0.1146559 | 0.1689666 | Biofilm_formation__Escherichia_coli_PATH_ko02020 | LADA vs Control |
| 795 | 0.6714485 | 0.7833566 | Biofilm_formation__Escherichia_coli_PATH_ko02020 | LADA vs T1D     |
| 991 | 0.5977305 | 0.8808660 | Biofilm_formation__Escherichia_coli_PATH_ko02020 | LADA vs T2D     |
| 599 | 0.8766262 | 0.9043091 | Biofilm_formation__Escherichia_coli_PATH_ko02020 | T1D vs T2D      |

# Biofilm\_formation\_\_\_Escherichia\_coli\_F

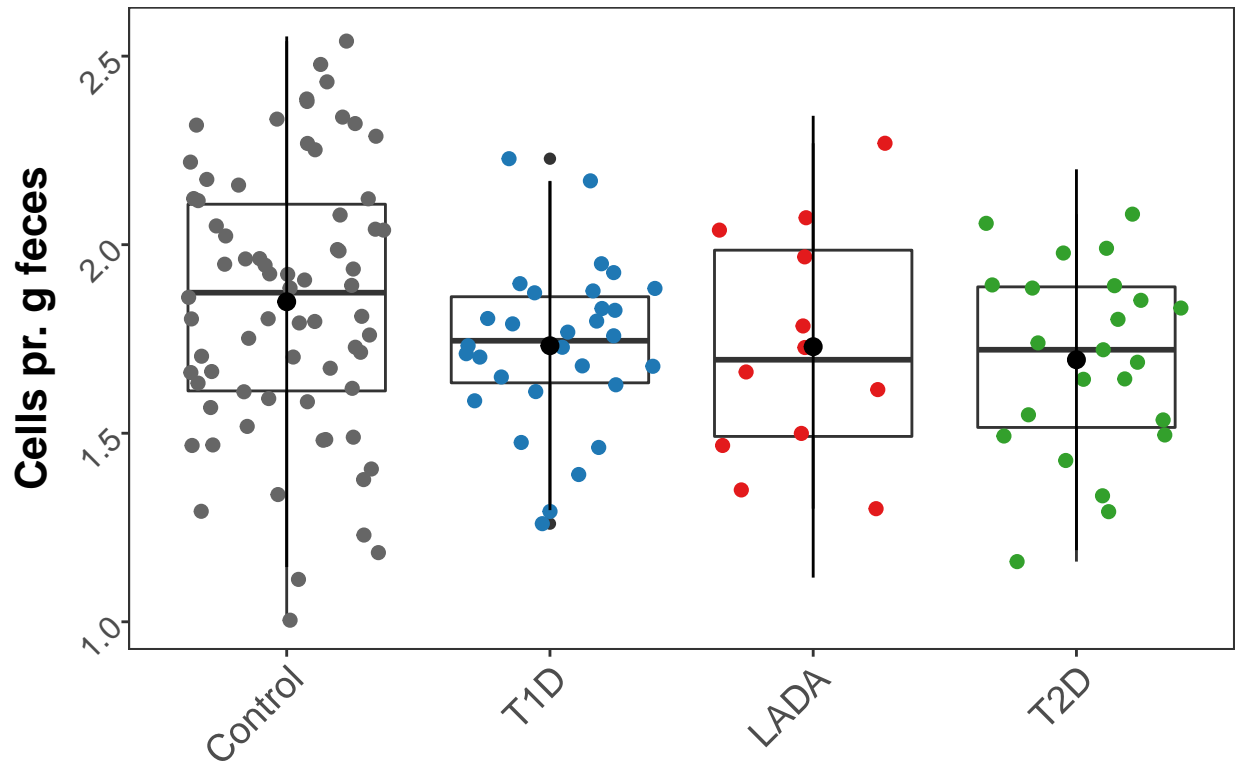

|      | pvalue    | padj      | Genus                          | compare         |
|------|-----------|-----------|--------------------------------|-----------------|
| 302  | 0.0071873 | 0.0629443 | Sulfur_metabolism_PATH_ko00920 | Control vs T2D  |
| 498  | 0.0380020 | 0.0735070 | Sulfur_metabolism_PATH_ko00920 | LADA vs Control |
| 106  | 0.0384875 | 0.3989340 | Sulfur_metabolism_PATH_ko00920 | Control vs T1D  |
| 694  | 0.4829973 | 0.6743371 | Sulfur_metabolism_PATH_ko00920 | T1D vs T2D      |
| 890  | 0.5648333 | 0.6828644 | Sulfur_metabolism_PATH_ko00920 | LADA vs T1D     |
| 1086 | 0.9950402 | 0.9986549 | Sulfur_metabolism_PATH_ko00920 | LADA vs T2D     |

# Sulfur\_metabolism\_PATH\_ko00920

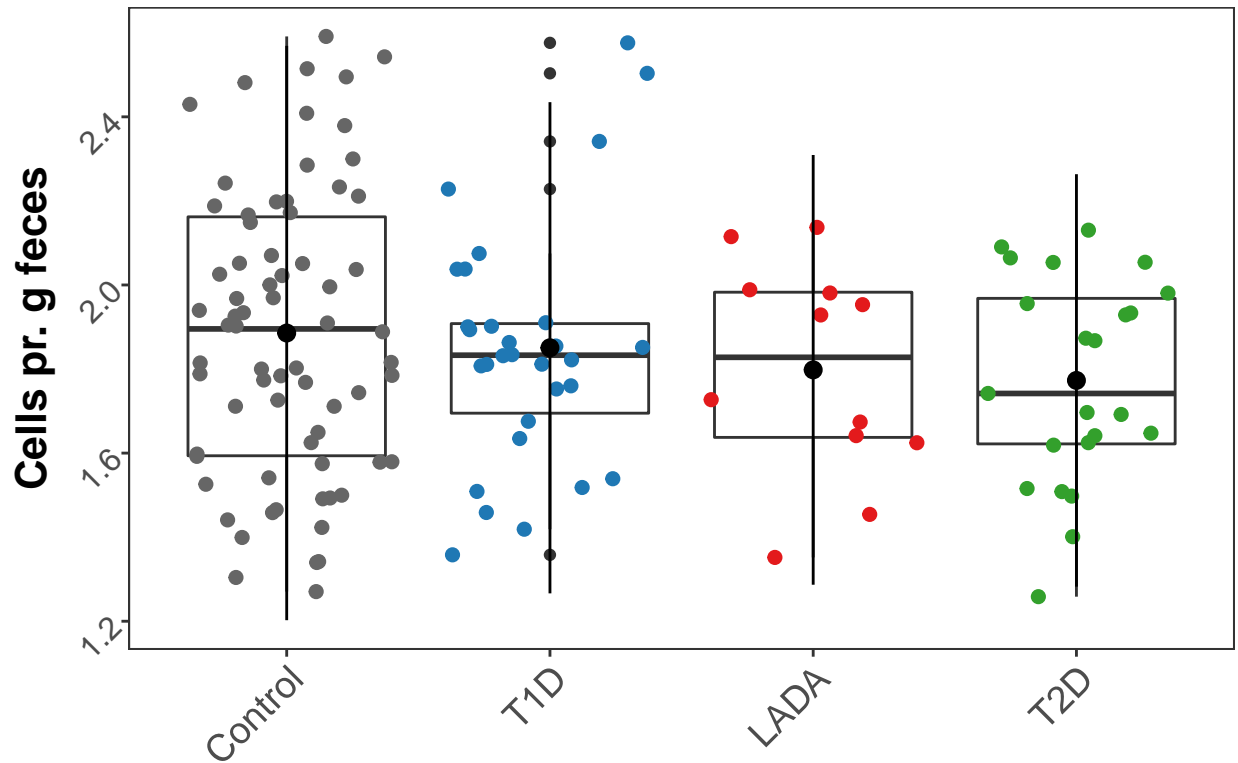

|      | pvalue    | padj      | Genus                                                  | compare        |
|------|-----------|-----------|--------------------------------------------------------|----------------|
| 370  | 0.0081464 | 0.0629443 | Chloroalkane_and_chloroalkene_degradation_PATH_ko00920 | Control vs T2D |
| 566  | 0.0352832 | 0.0705663 | Chloroalkane_and_chloroalkene_degradation_PATH_ko00920 | Control vs T1D |
| 958  | 0.2030764 | 0.3597318 | Chloroalkane_and_chloroalkene_degradation_PATH_ko00920 | Control vs T1D |
| 174  | 0.3069114 | 0.5208704 | Chloroalkane_and_chloroalkene_degradation_PATH_ko00920 | Control vs T1D |
| 762  | 0.1362050 | 0.6495082 | Chloroalkane_and_chloroalkene_degradation_PATH_ko00920 | Control vs T2D |
| 1154 | 0.9512310 | 0.9986549 | Chloroalkane_and_chloroalkene_degradation_PATH_ko00920 | Control vs T2D |

# Chloroalkane\_and\_chloroalkene\_degrad

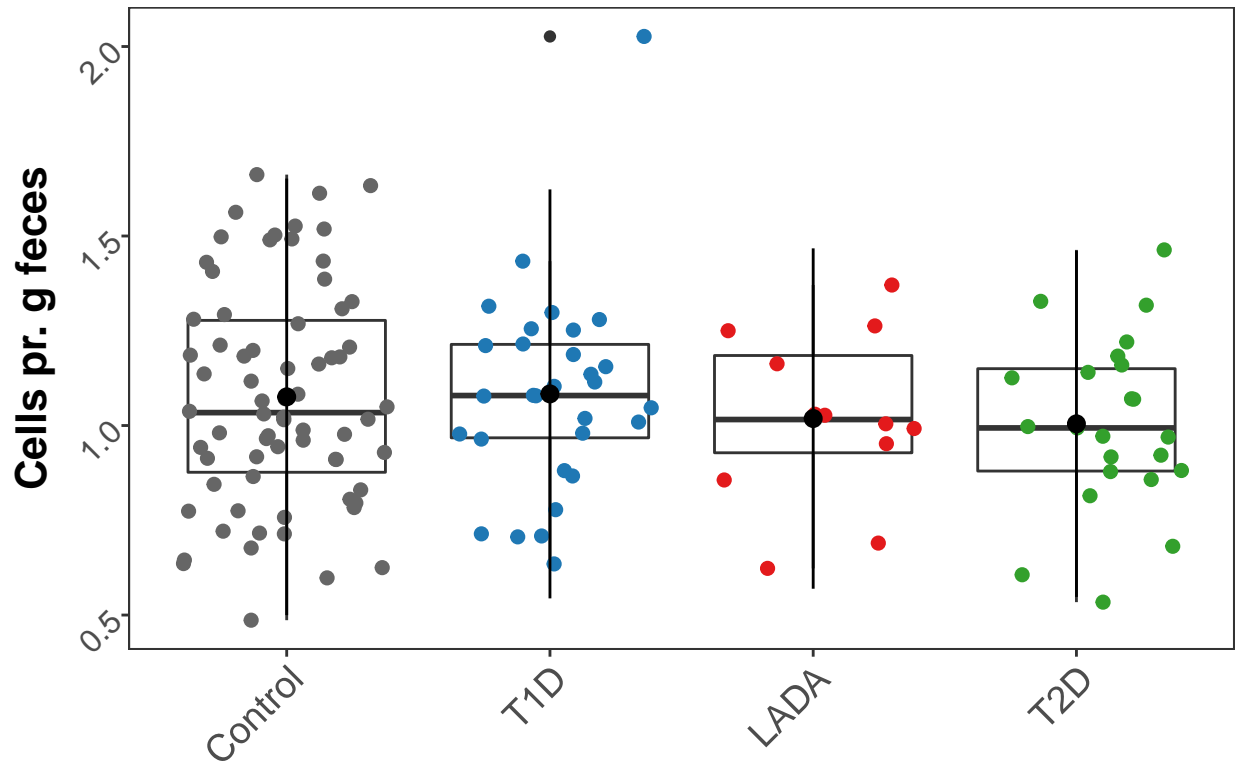

|      | pvalue    | padj      | Genus                             | compare         |
|------|-----------|-----------|-----------------------------------|-----------------|
| 345  | 0.0096014 | 0.0629443 | D_Alanine_metabolism_PATH_ko00473 | Control vs T2D  |
| 541  | 0.0311438 | 0.0642547 | D_Alanine_metabolism_PATH_ko00473 | LADA vs Control |
| 933  | 0.2866482 | 0.4244349 | D_Alanine_metabolism_PATH_ko00473 | LADA vs T1D     |
| 149  | 0.1561826 | 0.4612224 | D_Alanine_metabolism_PATH_ko00473 | Control vs T1D  |
| 737  | 0.2587296 | 0.6495082 | D_Alanine_metabolism_PATH_ko00473 | T1D vs T2D      |
| 1129 | 0.8862870 | 0.9704595 | D_Alanine_metabolism_PATH_ko00473 | LADA vs T2D     |



# D\_Alanine\_metabolism\_PATH\_ko00473

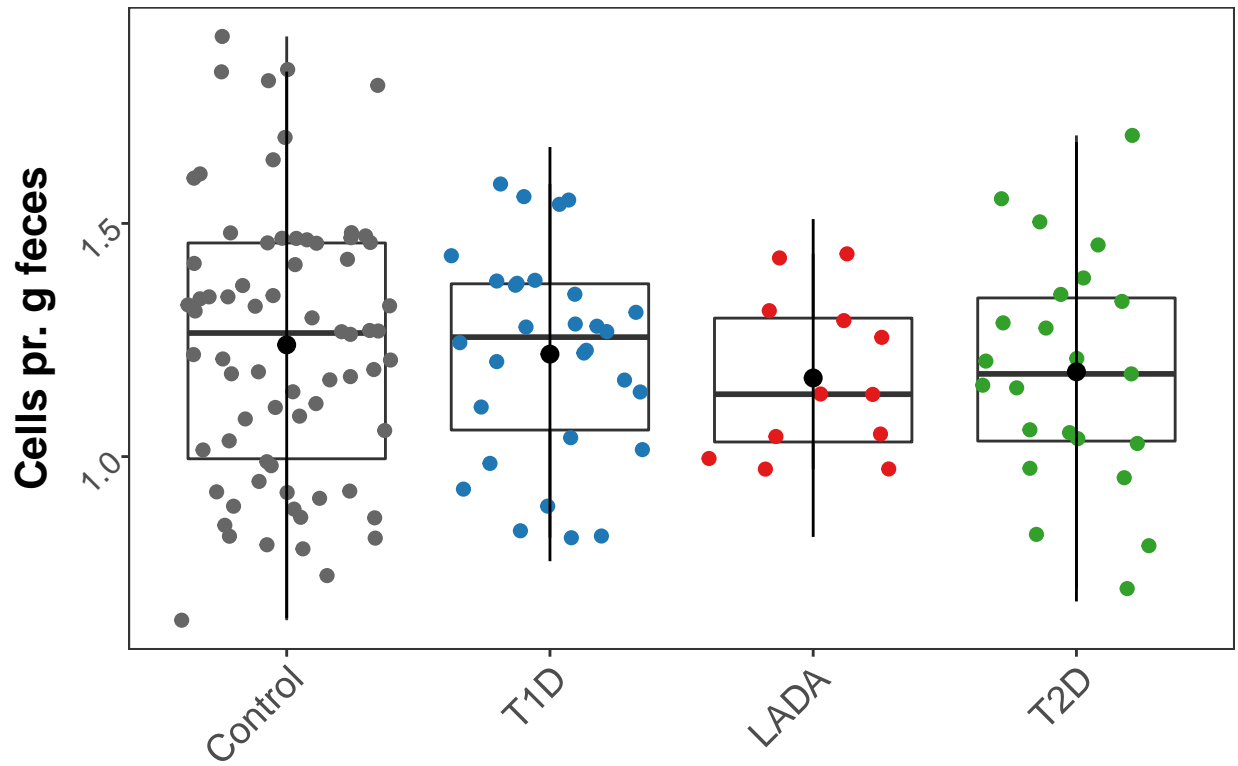

|     | pvalue    | padj      | Genus                                                 | compare        |
|-----|-----------|-----------|-------------------------------------------------------|----------------|
| 208 | 0.0129311 | 0.0629443 | Biofilm_formation_Pseudomonas_aeruginosa_PATH_ko00473 | Control vs T2D |
| 12  | 0.0035258 | 0.1382121 | Biofilm_formation_Pseudomonas_aeruginosa_PATH_ko00473 | Control vs T1D |
| 404 | 0.1049697 | 0.1570539 | Biofilm_formation_Pseudomonas_aeruginosa_PATH_ko00473 | Control vs T2D |
| 796 | 0.7031251 | 0.8154587 | Biofilm_formation_Pseudomonas_aeruginosa_PATH_ko00473 | Control vs T1D |
| 600 | 0.8872420 | 0.9047487 | Biofilm_formation_Pseudomonas_aeruginosa_PATH_ko00473 | T1D vs T2D     |
| 992 | 0.7985782 | 0.9100077 | Biofilm_formation_Pseudomonas_aeruginosa_PATH_ko00473 | Control vs T2D |

# Biofilm\_formation\_\_\_Pseudomonas\_aer

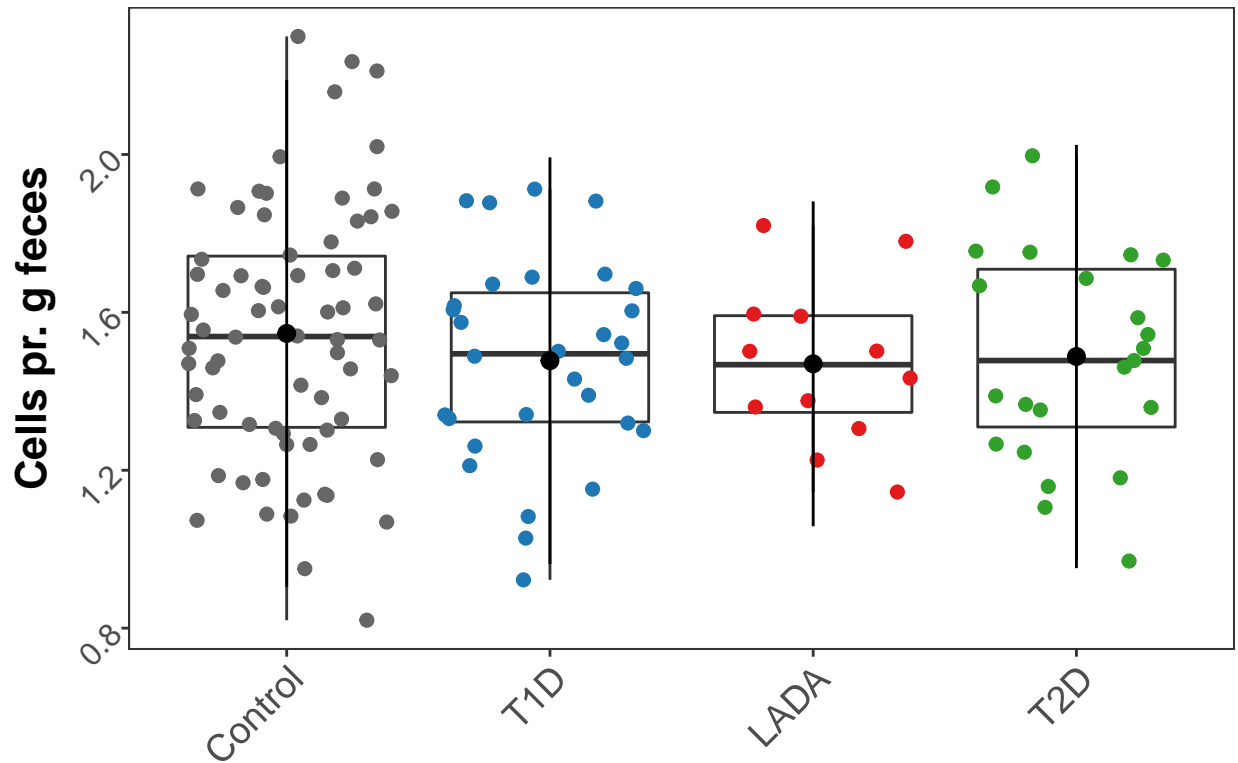

|      | pvalue    | padj      | Genus                                   | compare         |
|------|-----------|-----------|-----------------------------------------|-----------------|
| 217  | 0.0148552 | 0.0629443 | Bacterial_secretion_system_PATH_ko03070 | Control vs T2D  |
| 413  | 0.0401759 | 0.0749949 | Bacterial_secretion_system_PATH_ko03070 | LADA vs Control |
| 21   | 0.1017852 | 0.4612224 | Bacterial_secretion_system_PATH_ko03070 | Control vs T1D  |
| 805  | 0.4056344 | 0.5483058 | Bacterial_secretion_system_PATH_ko03070 | LADA vs T1D     |
| 609  | 0.4099136 | 0.6531957 | Bacterial_secretion_system_PATH_ko03070 | T1D vs T2D      |
| 1001 | 0.8757910 | 0.9643542 | Bacterial_secretion_system_PATH_ko03070 | LADA vs T2D     |

# Bacterial\_secretion\_system\_PATH\_ko03

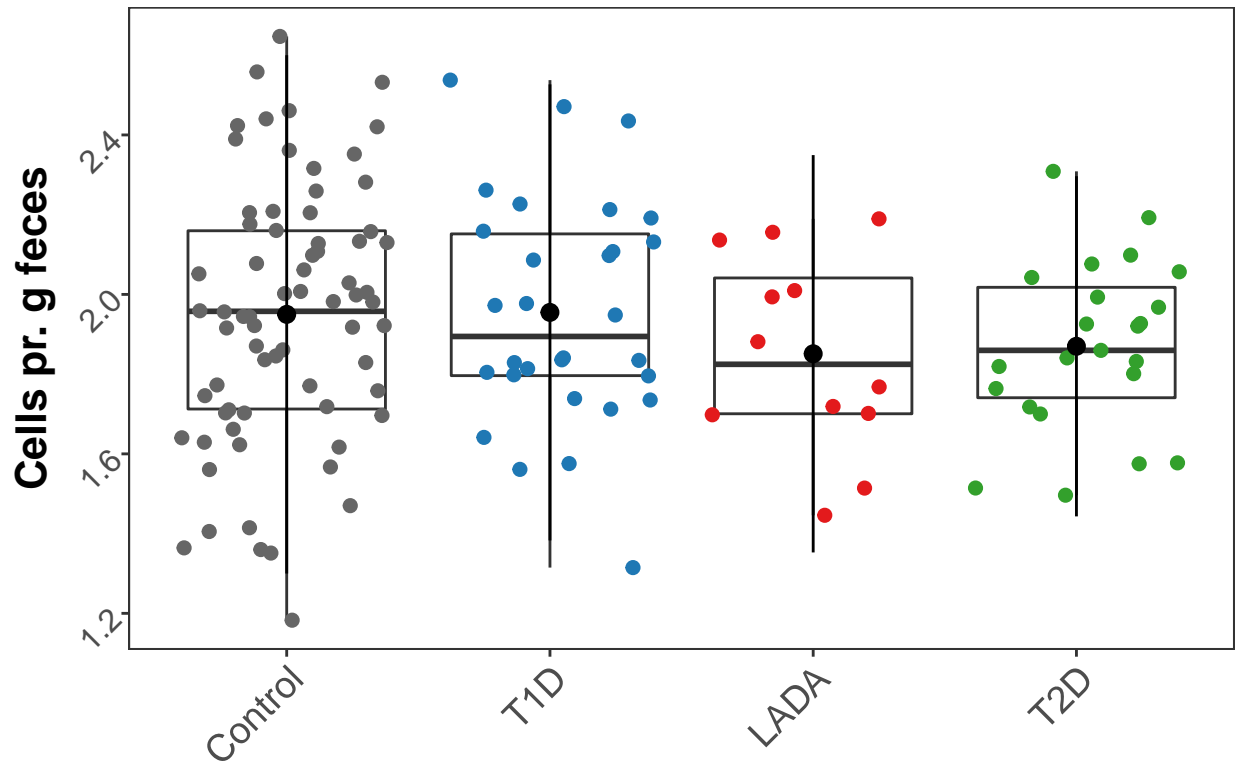

|      | pvalue    | padj      | Genus                                | compare         |
|------|-----------|-----------|--------------------------------------|-----------------|
| 378  | 0.0152764 | 0.0629443 | Naphthalene_degradation_PATH_ko00626 | Control vs T2D  |
| 574  | 0.1302975 | 0.1850602 | Naphthalene_degradation_PATH_ko00626 | LADA vs Control |
| 182  | 0.1750750 | 0.4762288 | Naphthalene_degradation_PATH_ko00626 | Control vs T1D  |
| 770  | 0.3002635 | 0.6495082 | Naphthalene_degradation_PATH_ko00626 | T1D vs T2D      |
| 966  | 0.6047801 | 0.7184054 | Naphthalene_degradation_PATH_ko00626 | LADA vs T1D     |
| 1162 | 0.7567110 | 0.9035121 | Naphthalene_degradation_PATH_ko00626 | LADA vs T2D     |

# Naphthalene\_degradation\_PATH\_ko0062

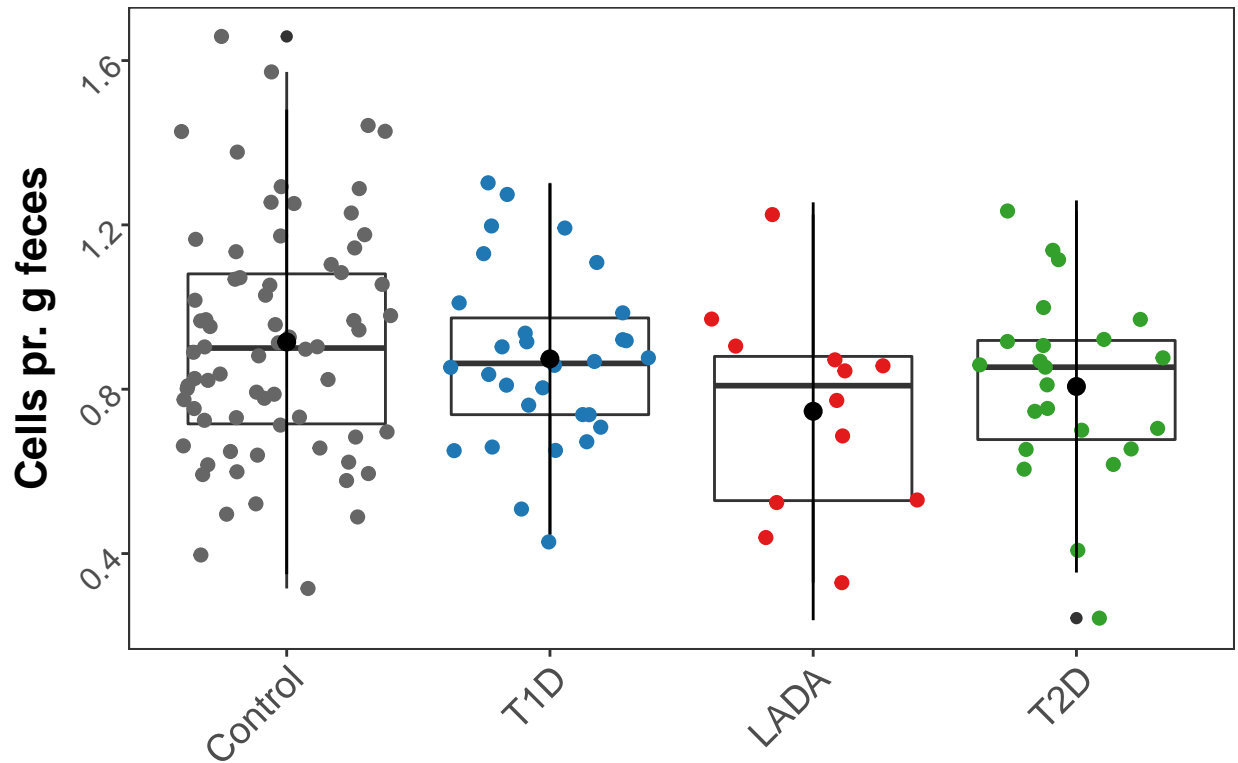

|      | pvalue    | padj      | Genus                                           | compare         |
|------|-----------|-----------|-------------------------------------------------|-----------------|
| 467  | 0.0315114 | 0.0643358 | Isoquinoline_alkaloid_biosynthesis_PATH_ko00950 | LADA vs Control |
| 271  | 0.1240067 | 0.1719420 | Isoquinoline_alkaloid_biosynthesis_PATH_ko00950 | Control vs T2D  |
| 859  | 0.2479259 | 0.3950690 | Isoquinoline_alkaloid_biosynthesis_PATH_ko00950 | LADA vs T1D     |
| 75   | 0.2038661 | 0.4786856 | Isoquinoline_alkaloid_biosynthesis_PATH_ko00950 | Control vs T1D  |
| 663  | 0.7388067 | 0.8181137 | Isoquinoline_alkaloid_biosynthesis_PATH_ko00950 | T1D vs T2D      |
| 1055 | 0.3960348 | 0.8415375 | Isoquinoline_alkaloid_biosynthesis_PATH_ko00950 | LADA vs T2D     |

# Isoquinoline\_alkaloid\_biosynthesis\_PAT

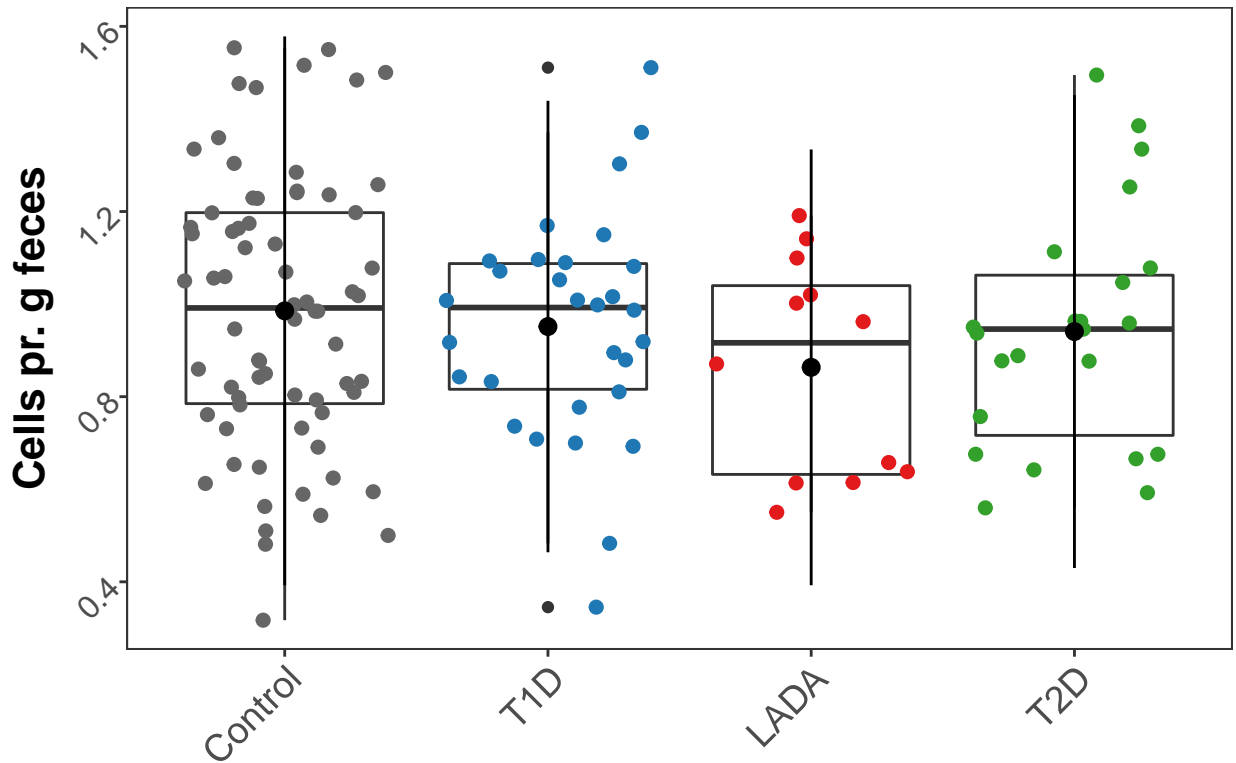

|      | pvalue    | padj      | Genus                                                | compare         |
|------|-----------|-----------|------------------------------------------------------|-----------------|
| 267  | 0.0196938 | 0.0661577 | Biosynthesis_of_various_secondary_metabolites_part_1 | Control vs T2D  |
| 463  | 0.0768995 | 0.1205785 | Biosynthesis_of_various_secondary_metabolites_part_1 | LADA vs Control |
| 71   | 0.1072874 | 0.4612224 | Biosynthesis_of_various_secondary_metabolites_part_1 | Control vs T1D  |
| 659  | 0.4506432 | 0.6743371 | Biosynthesis_of_various_secondary_metabolites_part_1 | T1D vs T2D      |
| 855  | 0.5557227 | 0.6765319 | Biosynthesis_of_various_secondary_metabolites_part_1 | LADA vs T1D     |
| 1051 | 0.9824926 | 0.9986549 | Biosynthesis_of_various_secondary_metabolites_part_1 | LADA vs T2D     |

# Biosynthesis\_of\_various\_secondary\_me

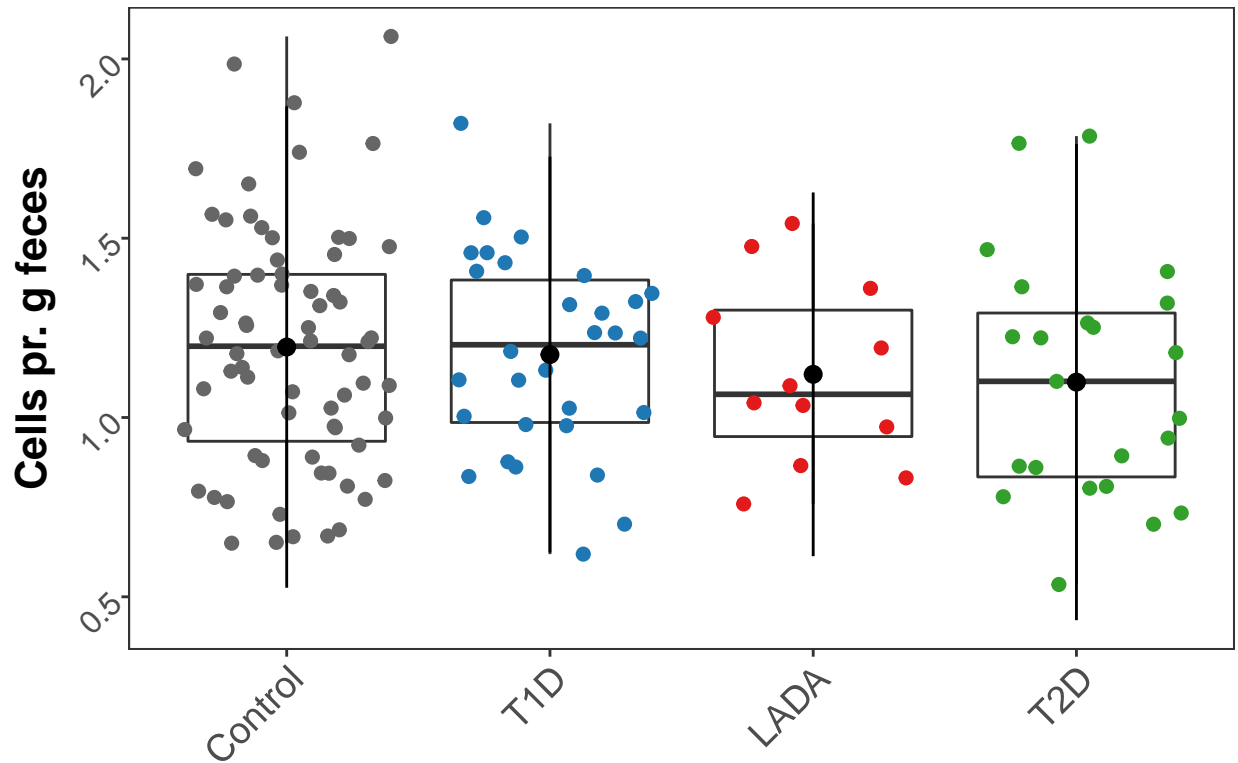

|      | pvalue    | padj      | Genus                                 | compare         |
|------|-----------|-----------|---------------------------------------|-----------------|
| 278  | 0.0248215 | 0.0676342 | Prodigiosin_biosynthesis_PATH_ko00333 | Control vs T2D  |
| 474  | 0.0378937 | 0.0735070 | Prodigiosin_biosynthesis_PATH_ko00333 | LADA vs Control |
| 866  | 0.2091879 | 0.3628392 | Prodigiosin_biosynthesis_PATH_ko00333 | LADA vs T1D     |
| 82   | 0.3140599 | 0.5216587 | Prodigiosin_biosynthesis_PATH_ko00333 | Control vs T1D  |
| 670  | 0.2487250 | 0.6495082 | Prodigiosin_biosynthesis_PATH_ko00333 | T1D vs T2D      |
| 1062 | 0.7589838 | 0.9035121 | Prodigiosin_biosynthesis_PATH_ko00333 | LADA vs T2D     |

# Prodigiosin\_biosynthesis\_PATH\_ko0033

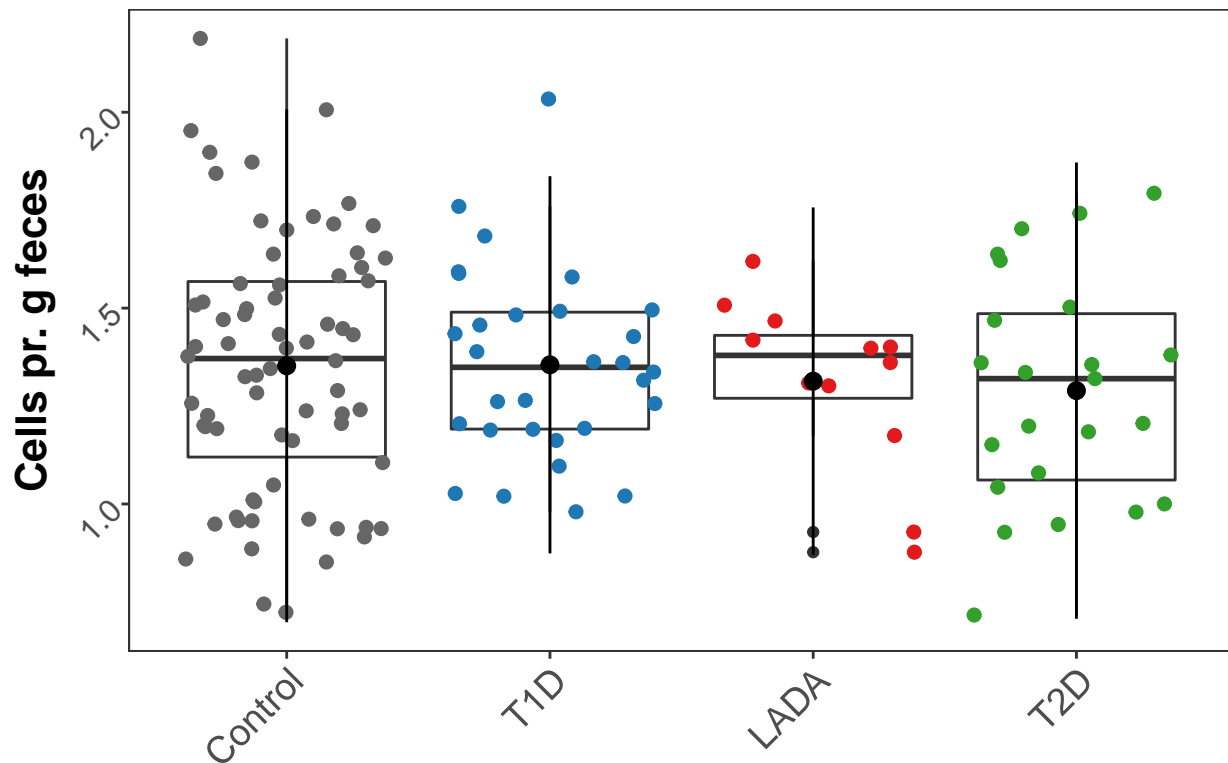

|      | pvalue    | padj      | Genus                             | compare         |
|------|-----------|-----------|-----------------------------------|-----------------|
| 368  | 0.0257934 | 0.0676342 | Benzoate_degradation_PATH_ko00362 | Control vs T2D  |
| 564  | 0.0469021 | 0.0820786 | Benzoate_degradation_PATH_ko00362 | LADA vs Control |
| 172  | 0.1356570 | 0.4612224 | Benzoate_degradation_PATH_ko00362 | Control vs T1D  |
| 956  | 0.3873540 | 0.5346576 | Benzoate_degradation_PATH_ko00362 | LADA vs T1D     |
| 760  | 0.4482381 | 0.6743371 | Benzoate_degradation_PATH_ko00362 | T1D vs T2D      |
| 1152 | 0.8111711 | 0.9163617 | Benzoate_degradation_PATH_ko00362 | LADA vs T2D     |

# Benzoate\_degradation\_PATH\_ko00362

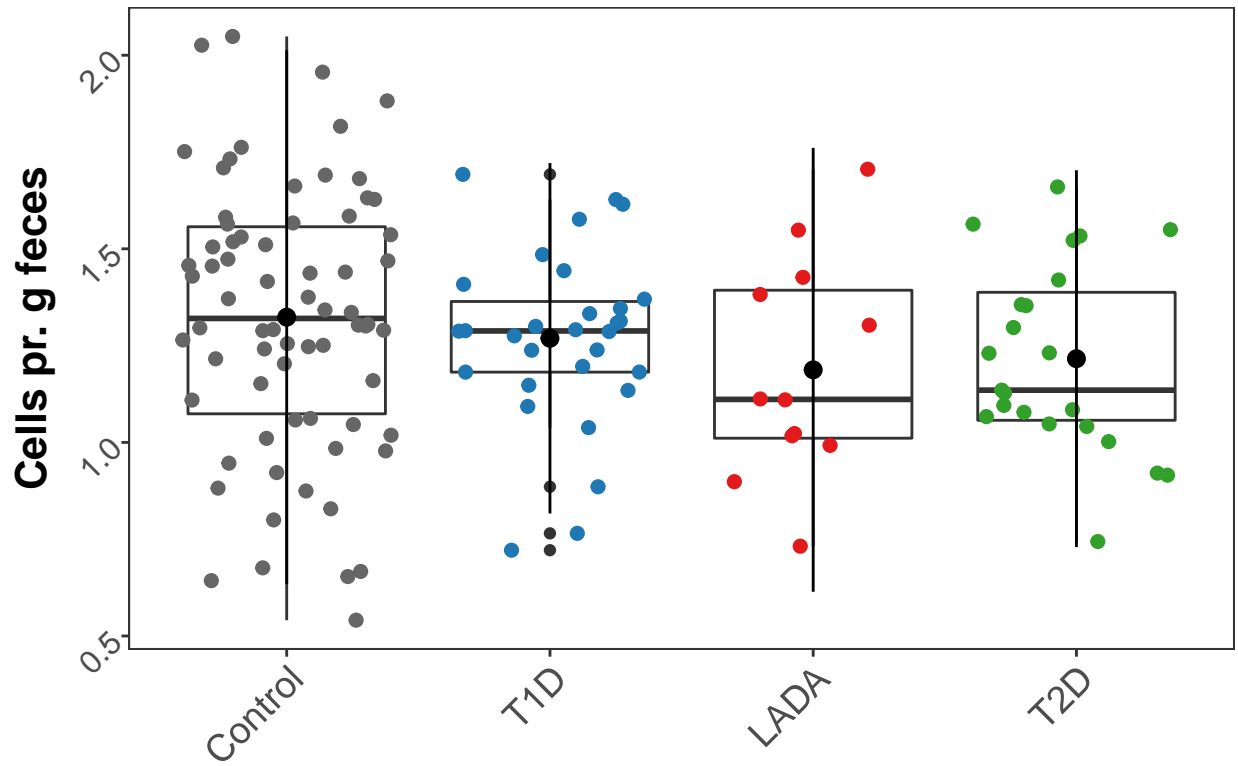

|      | pvalue    | padj      | Genus                                       | compare         |
|------|-----------|-----------|---------------------------------------------|-----------------|
| 374  | 0.0275547 | 0.0676342 | Drug_metabolism__other_enzymes_PATH_ko00362 | Control vs T2D  |
| 570  | 0.0448924 | 0.0807239 | Drug_metabolism__other_enzymes_PATH_ko00362 | LADA vs Control |
| 962  | 0.2662998 | 0.4051834 | Drug_metabolism__other_enzymes_PATH_ko00362 | LADA vs T1D     |
| 178  | 0.2577608 | 0.4839499 | Drug_metabolism__other_enzymes_PATH_ko00362 | Control vs T1D  |
| 766  | 0.3077980 | 0.6495082 | Drug_metabolism__other_enzymes_PATH_ko00362 | T1D vs T2D      |
| 1158 | 0.7852353 | 0.9053301 | Drug_metabolism__other_enzymes_PATH_ko00362 | LADA vs T2D     |



# Drug\_metabolism\_\_\_other\_enzymes\_PA

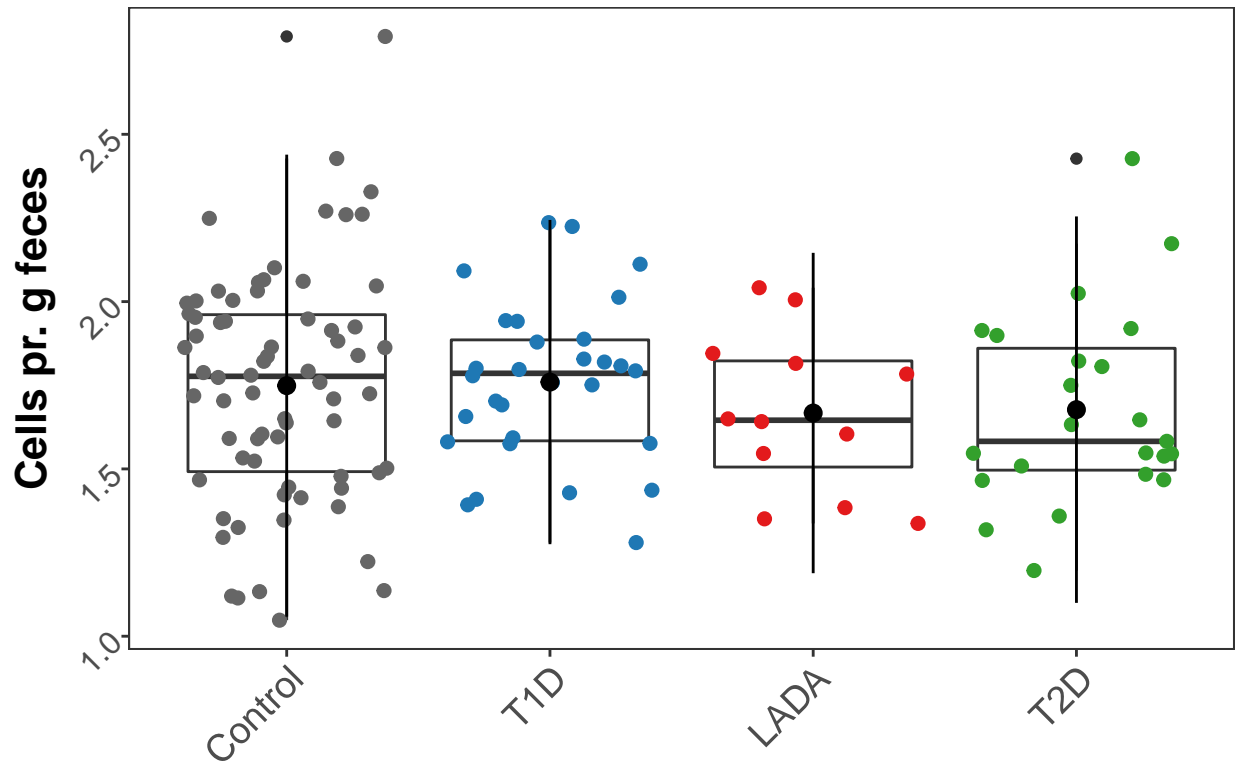

|      | pvalue    | padj      | Genus                             | compare         |
|------|-----------|-----------|-----------------------------------|-----------------|
| 389  | 0.0276979 | 0.0676342 | Degradation_of_aromatic_compounds | Control vs T2D  |
| 585  | 0.0386287 | 0.0735070 | Degradation_of_aromatic_compounds | LADA vs Control |
| 977  | 0.2460279 | 0.3950690 | Degradation_of_aromatic_compounds | LADA vs T1D     |
| 193  | 0.2520755 | 0.4839499 | Degradation_of_aromatic_compounds | Control vs T1D  |
| 781  | 0.3137589 | 0.6495082 | Degradation_of_aromatic_compounds | T1D vs T2D      |
| 1173 | 0.7424051 | 0.9035121 | Degradation_of_aromatic_compounds | LADA vs T2D     |

# Degradation\_of\_aromatic\_compounds

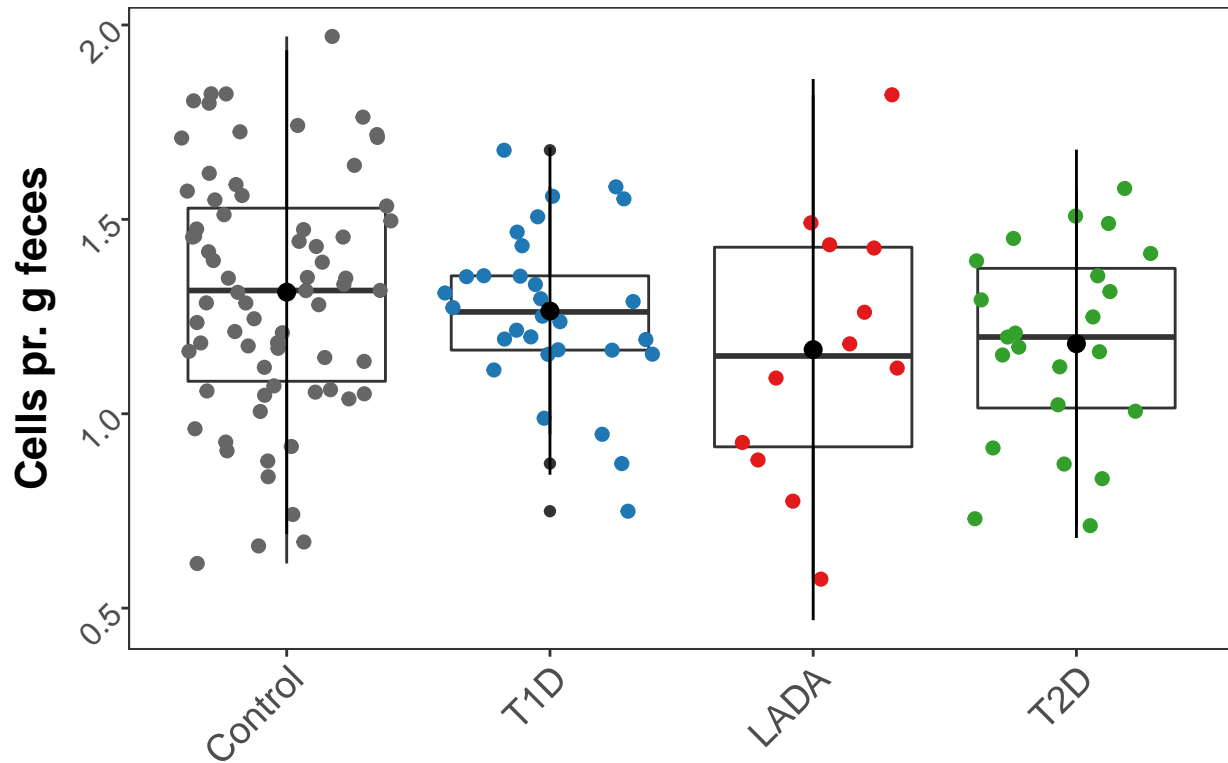

|     | pvalue    | padj      | Genus                                          | compare         |
|-----|-----------|-----------|------------------------------------------------|-----------------|
| 209 | 0.0293667 | 0.0676342 | Biofilm_formation__Vibrio_cholerae_PATH_ko0511 | Control vs T2D  |
| 405 | 0.0518124 | 0.0867968 | Biofilm_formation__Vibrio_cholerae_PATH_ko0511 | LADA vs Control |
| 13  | 0.1151252 | 0.4612224 | Biofilm_formation__Vibrio_cholerae_PATH_ko0511 | Control vs T1D  |
| 797 | 0.4399535 | 0.5826411 | Biofilm_formation__Vibrio_cholerae_PATH_ko0511 | LADA vs T1D     |
| 601 | 0.5165646 | 0.6862683 | Biofilm_formation__Vibrio_cholerae_PATH_ko0511 | T1D vs T2D      |
| 993 | 0.8135048 | 0.9163617 | Biofilm_formation__Vibrio_cholerae_PATH_ko0511 | LADA vs T2D     |

# Biofilm\_formation\_\_\_Vibrio\_cholerae\_PA

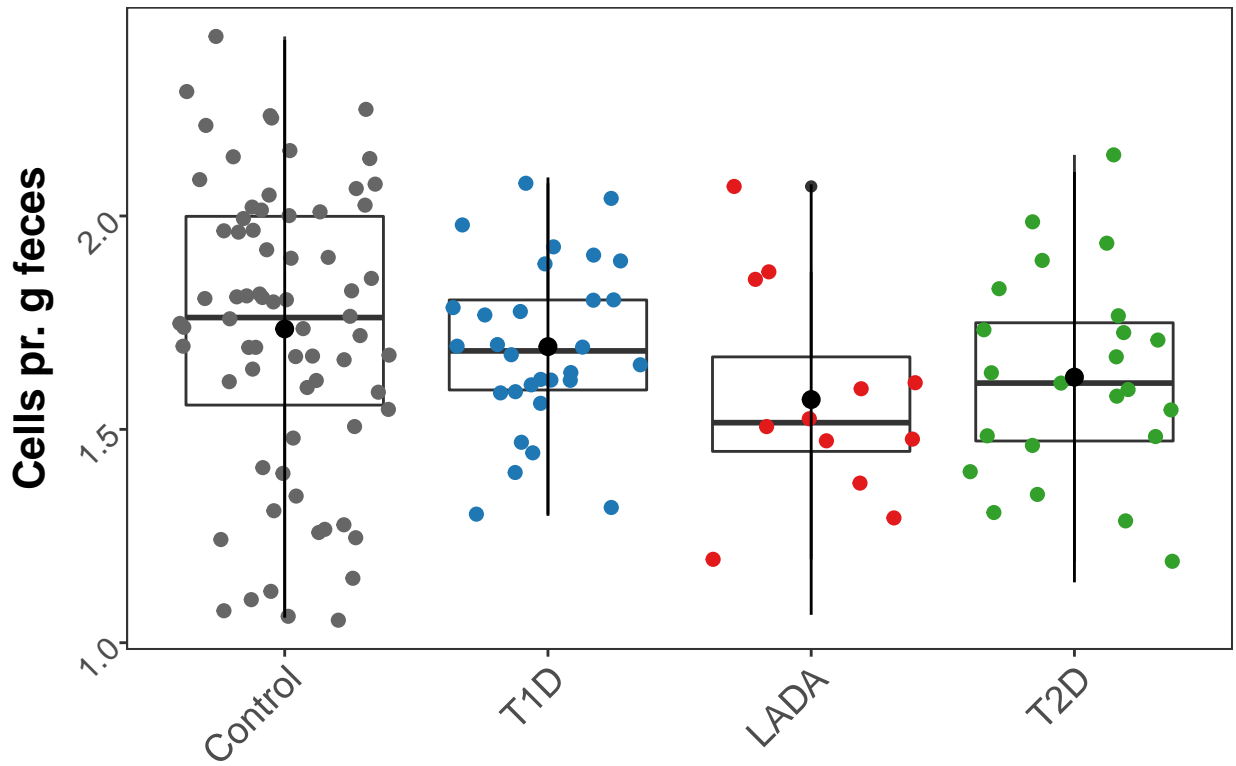

|      | pvalue    | padj      | Genus                          | compare         |
|------|-----------|-----------|--------------------------------|-----------------|
| 331  | 0.0312298 | 0.0681056 | Biotin_metabolism_PATH_ko00780 | Control vs T2D  |
| 527  | 0.0480627 | 0.0831633 | Biotin_metabolism_PATH_ko00780 | LADA vs Control |
| 919  | 0.2456691 | 0.3950690 | Biotin_metabolism_PATH_ko00780 | LADA vs T1D     |
| 135  | 0.3109569 | 0.5209193 | Biotin_metabolism_PATH_ko00780 | Control vs T1D  |
| 723  | 0.2844967 | 0.6495082 | Biotin_metabolism_PATH_ko00780 | T1D vs T2D      |
| 1115 | 0.7790487 | 0.9035121 | Biotin_metabolism_PATH_ko00780 | LADA vs T2D     |

# Biotin\_metabolism\_PATH\_ko00780

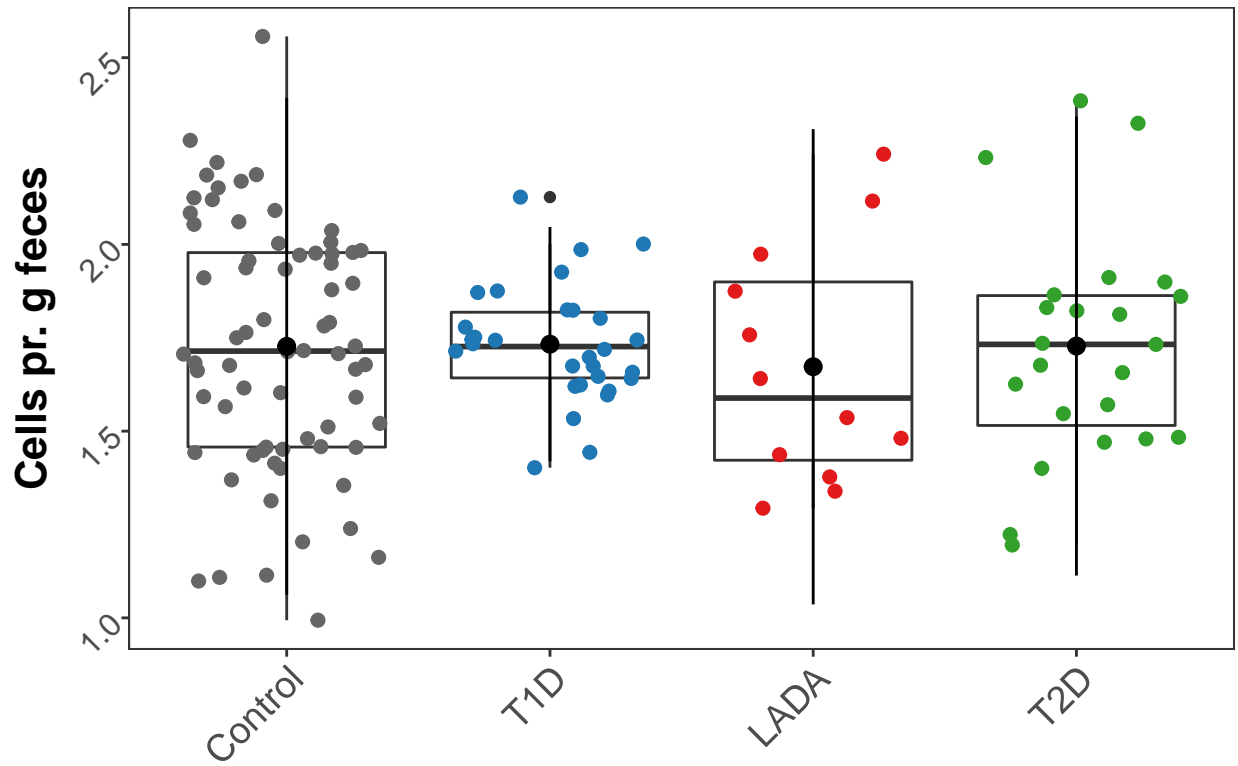

|      | pvalue    | padj      | Genus                                        | compare         |
|------|-----------|-----------|----------------------------------------------|-----------------|
| 252  | 0.0313699 | 0.0681056 | Arginine_and_proline_metabolism_PATH_ko00330 | Control vs T2D  |
| 448  | 0.0626192 | 0.1014328 | Arginine_and_proline_metabolism_PATH_ko00330 | LADA vs Control |
| 56   | 0.1412318 | 0.4612224 | Arginine_and_proline_metabolism_PATH_ko00330 | Control vs T1D  |
| 840  | 0.4453473 | 0.5858260 | Arginine_and_proline_metabolism_PATH_ko00330 | LADA vs T1D     |
| 644  | 0.4788779 | 0.6743371 | Arginine_and_proline_metabolism_PATH_ko00330 | T1D vs T2D      |
| 1036 | 0.8564261 | 0.9483589 | Arginine_and_proline_metabolism_PATH_ko00330 | LADA vs T2D     |

# Arginine\_and\_proline\_metabolism\_PATH

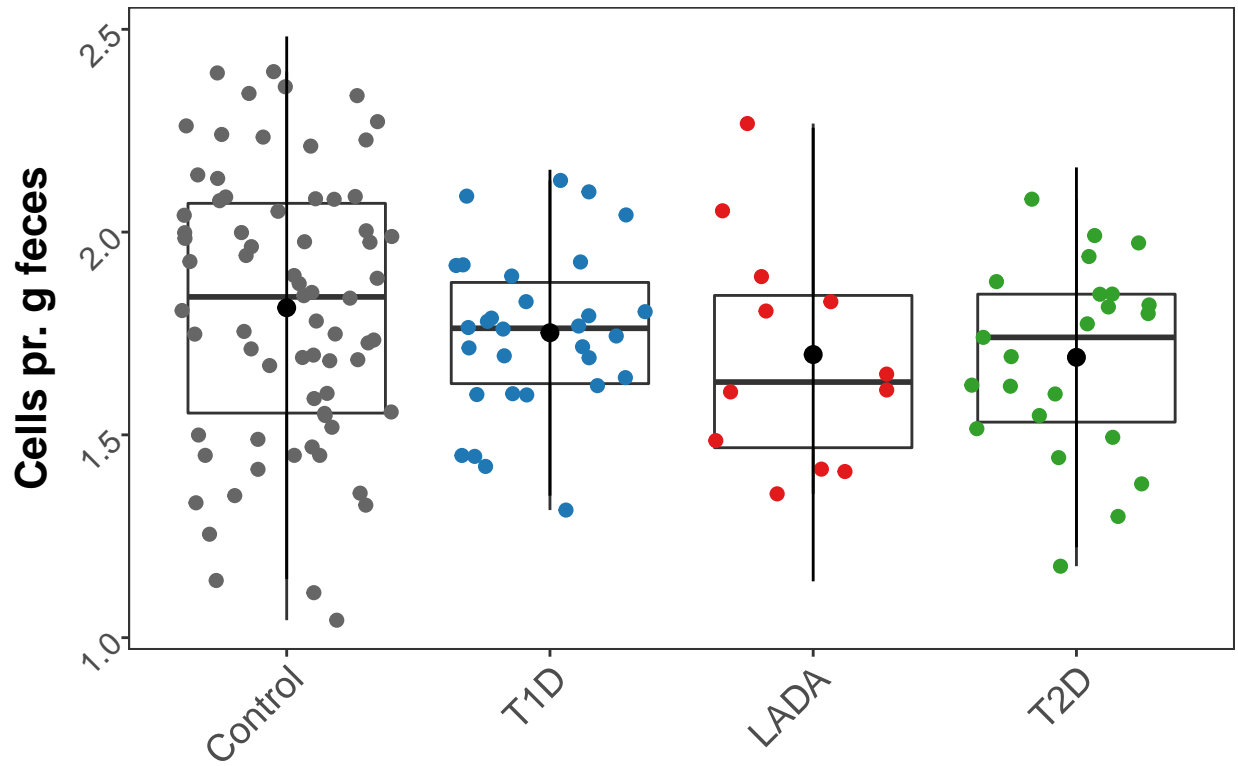

|      | pvalue    | padj      | Genus                            | compare         |
|------|-----------|-----------|----------------------------------|-----------------|
| 458  | 0.0341670 | 0.0690384 | Tyrosine_metabolism_PATH_ko00350 | LADA vs Control |
| 262  | 0.0409613 | 0.0768024 | Tyrosine_metabolism_PATH_ko00350 | Control vs T2D  |
| 850  | 0.2004295 | 0.3597318 | Tyrosine_metabolism_PATH_ko00350 | LADA vs T1D     |
| 66   | 0.3036615 | 0.5208704 | Tyrosine_metabolism_PATH_ko00350 | Control vs T1D  |
| 654  | 0.3357612 | 0.6495082 | Tyrosine_metabolism_PATH_ko00350 | T1D vs T2D      |
| 1046 | 0.6320113 | 0.8841442 | Tyrosine_metabolism_PATH_ko00350 | LADA vs T2D     |

# Tyrosine\_metabolism\_PATH\_ko00350

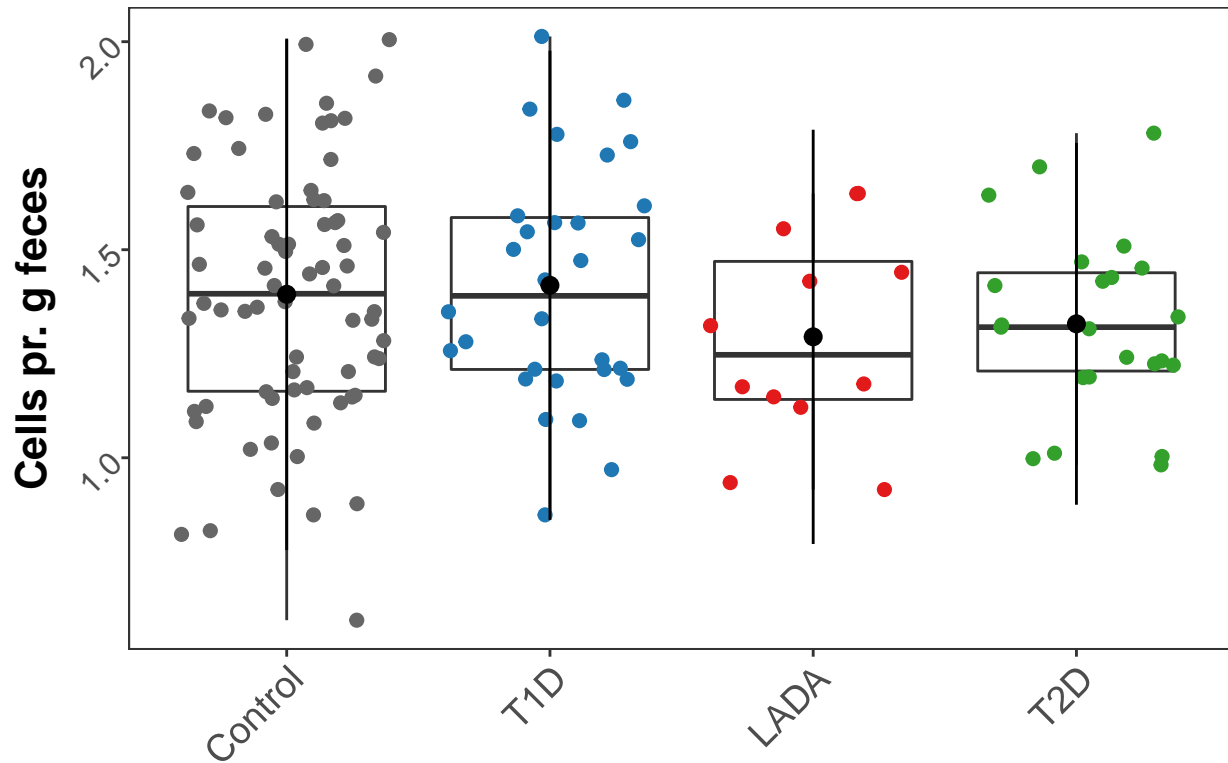

|      | pvalue    | padj      | Genus                               | compare         |
|------|-----------|-----------|-------------------------------------|-----------------|
| 219  | 0.0352923 | 0.0725327 | AMPK_signaling_pathway_PATH_ko04152 | Control vs T2D  |
| 415  | 0.0428161 | 0.0779543 | AMPK_signaling_pathway_PATH_ko04152 | LADA vs Control |
| 807  | 0.0242413 | 0.2312928 | AMPK_signaling_pathway_PATH_ko04152 | LADA vs T1D     |
| 611  | 0.0203944 | 0.6495082 | AMPK_signaling_pathway_PATH_ko04152 | T1D vs T2D      |
| 23   | 0.5307493 | 0.6889196 | AMPK_signaling_pathway_PATH_ko04152 | Control vs T1D  |
| 1003 | 0.7215122 | 0.9035121 | AMPK_signaling_pathway_PATH_ko04152 | LADA vs T2D     |

# AMPK\_signaling\_pathway\_PATH\_ko041!

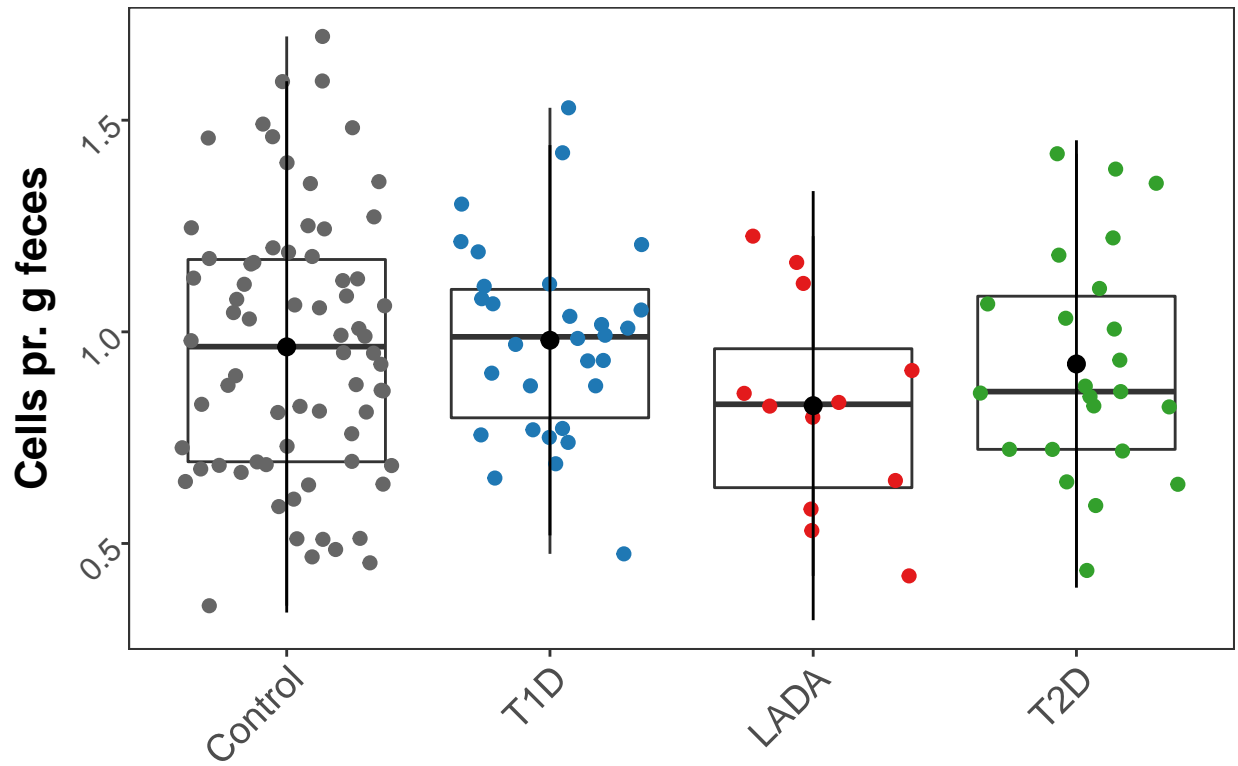

|      | pvalue    | padj      | Genus                              | compare         |
|------|-----------|-----------|------------------------------------|-----------------|
| 535  | 0.0370487 | 0.0733489 | Riboflavin_metabolism_PATH_ko00740 | LADA vs Control |
| 339  | 0.0766963 | 0.1182699 | Riboflavin_metabolism_PATH_ko00740 | Control vs T2D  |
| 927  | 0.0996344 | 0.2458003 | Riboflavin_metabolism_PATH_ko00740 | LADA vs T1D     |
| 731  | 0.2248701 | 0.6495082 | Riboflavin_metabolism_PATH_ko00740 | T1D vs T2D      |
| 143  | 0.6831189 | 0.7784378 | Riboflavin_metabolism_PATH_ko00740 | Control vs T1D  |
| 1123 | 0.5255508 | 0.8415375 | Riboflavin_metabolism_PATH_ko00740 | LADA vs T2D     |

# Riboflavin\_metabolism\_PATH\_ko00740

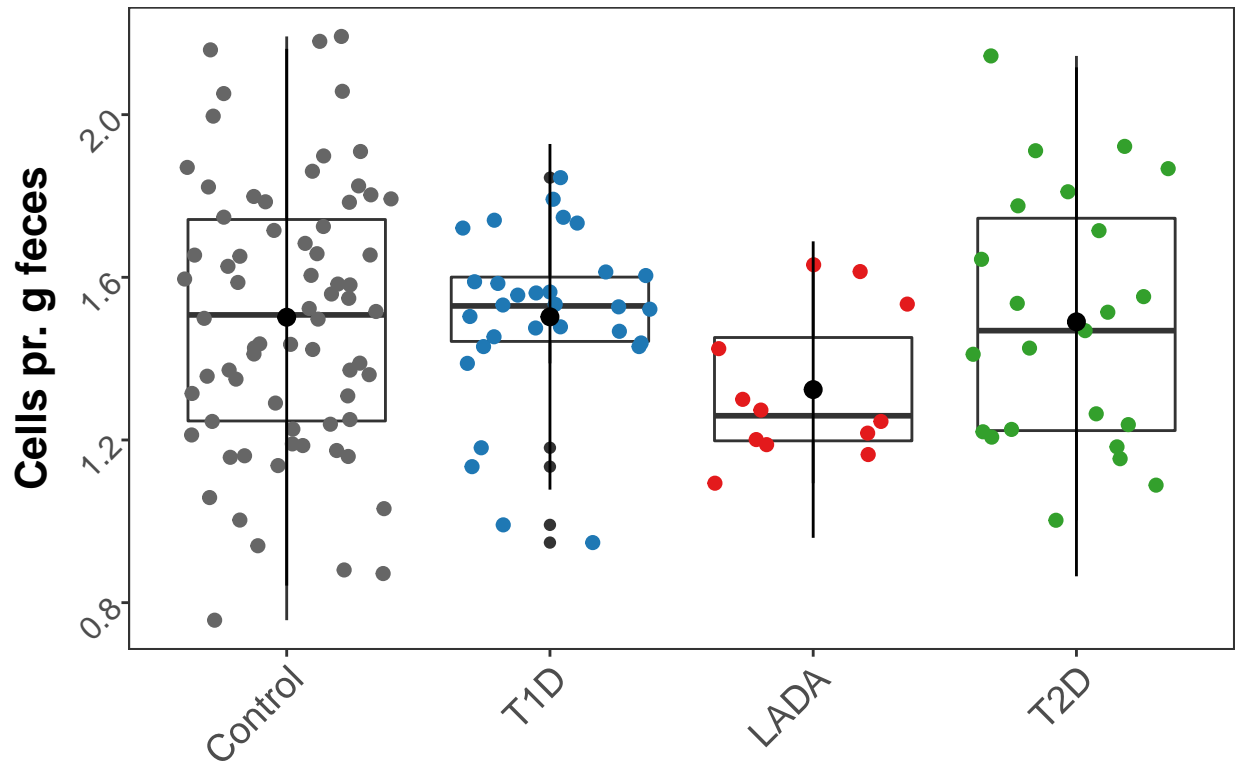

|      | pvalue    | padj      | Genus                                           | compare         |
|------|-----------|-----------|-------------------------------------------------|-----------------|
| 547  | 0.0384996 | 0.0735070 | Taurine_and_hypotaurine_metabolism_PATH_ko00430 | LADA vs Control |
| 351  | 0.0811697 | 0.1238826 | Taurine_and_hypotaurine_metabolism_PATH_ko00430 | Control vs T2D  |
| 939  | 0.2352270 | 0.3940555 | Taurine_and_hypotaurine_metabolism_PATH_ko00430 | LADA vs T1D     |
| 155  | 0.2691132 | 0.4873448 | Taurine_and_hypotaurine_metabolism_PATH_ko00430 | Control vs T1D  |
| 743  | 0.5207430 | 0.6862683 | Taurine_and_hypotaurine_metabolism_PATH_ko00430 | T1D vs T2D      |
| 1135 | 0.5230035 | 0.8415375 | Taurine_and_hypotaurine_metabolism_PATH_ko00430 | LADA vs T2D     |



# Taurine\_and\_hypotaurine\_metabolism\_F

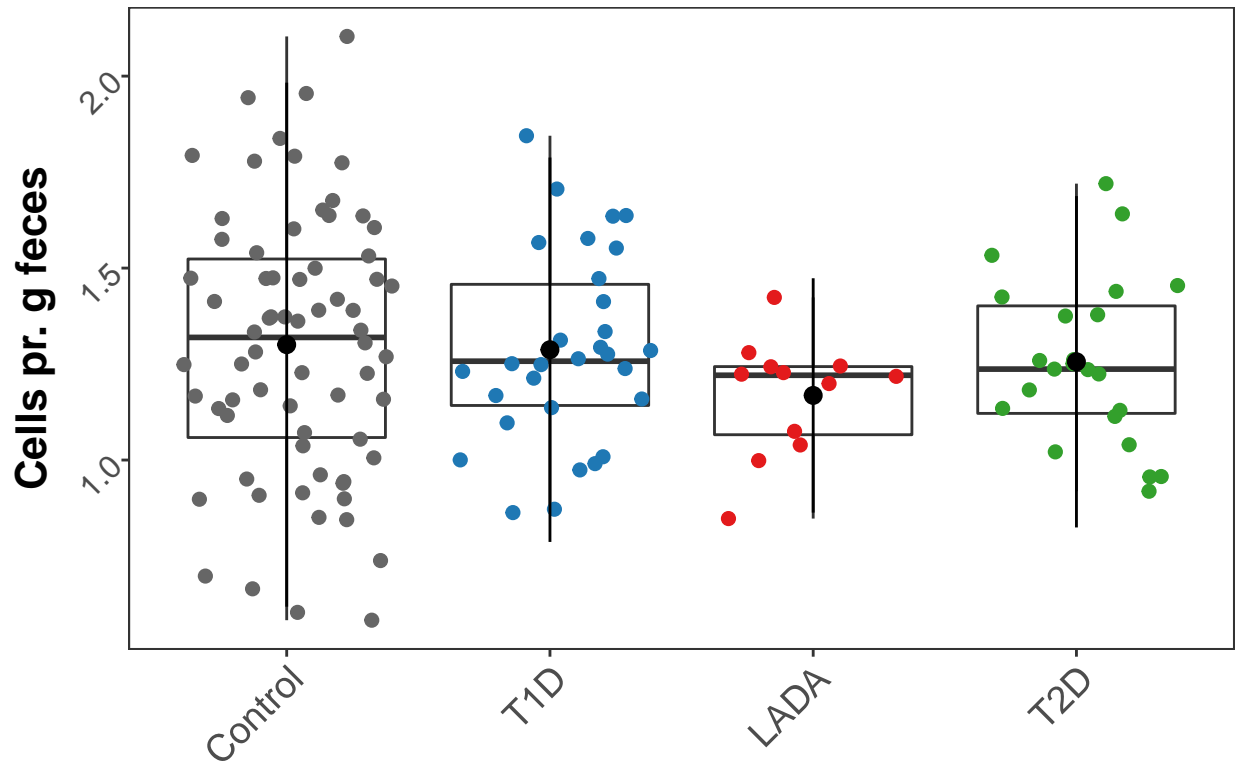

|      | pvalue    | padj      | Genus                            | compare         |
|------|-----------|-----------|----------------------------------|-----------------|
| 577  | 0.0394743 | 0.0743938 | Toluene_degradation_PATH_ko00623 | LADA vs Control |
| 969  | 0.0430751 | 0.2312928 | Toluene_degradation_PATH_ko00623 | LADA vs T1D     |
| 773  | 0.6031845 | 0.7461523 | Toluene_degradation_PATH_ko00623 | T1D vs T2D      |
| 1165 | 0.1246054 | 0.8415375 | Toluene_degradation_PATH_ko00623 | LADA vs T2D     |
| 185  | 0.8271268 | 0.8835907 | Toluene_degradation_PATH_ko00623 | Control vs T1D  |
| 381  | 0.6883169 | NA        | Toluene_degradation_PATH_ko00623 | Control vs T2D  |

# Toluene\_degradation\_PATH\_ko00623

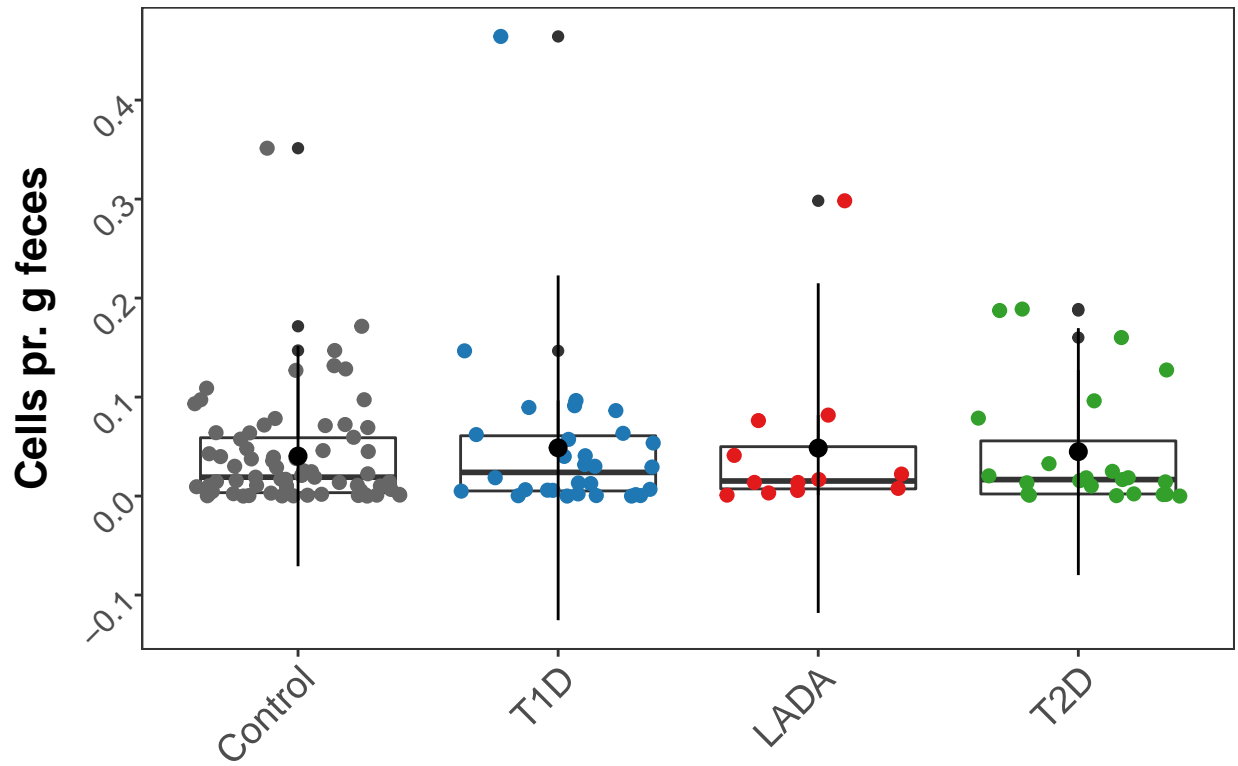

|      | pvalue    | padj      | Genus                                 | compare         |
|------|-----------|-----------|---------------------------------------|-----------------|
| 455  | 0.0407834 | 0.0754107 | Phenylalanine_metabolism_PATH_ko00360 | LADA vs Control |
| 259  | 0.0653762 | 0.1037218 | Phenylalanine_metabolism_PATH_ko00360 | Control vs T2D  |
| 847  | 0.1484133 | 0.3094575 | Phenylalanine_metabolism_PATH_ko00360 | LADA vs T1D     |
| 651  | 0.2833699 | 0.6495082 | Phenylalanine_metabolism_PATH_ko00360 | T1D vs T2D      |
| 63   | 0.5047713 | 0.6651524 | Phenylalanine_metabolism_PATH_ko00360 | Control vs T1D  |
| 1043 | 0.5814776 | 0.8682081 | Phenylalanine_metabolism_PATH_ko00360 | LADA vs T2D     |

# Phenylalanine\_metabolism\_PATH\_ko003

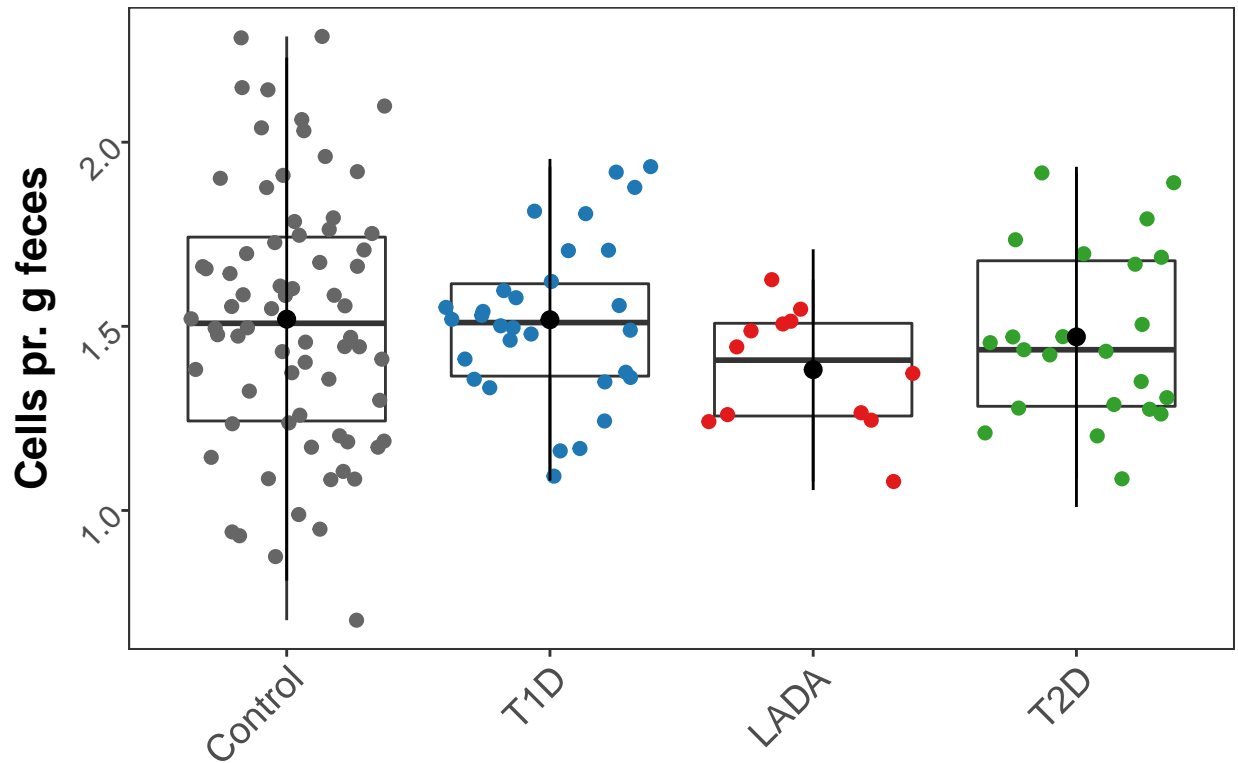

|      | pvalue    | padj      | Genus                                                | compare         |
|------|-----------|-----------|------------------------------------------------------|-----------------|
| 318  | 0.0402245 | 0.0767378 | Biosynthesis_of_unsaturated_fatty_acids_PATH_ko01040 | Control vs T2D  |
| 514  | 0.0429544 | 0.0779543 | Biosynthesis_of_unsaturated_fatty_acids_PATH_ko01040 | LADA vs Control |
| 906  | 0.2037257 | 0.3597318 | Biosynthesis_of_unsaturated_fatty_acids_PATH_ko01040 | LADA vs T1D     |
| 122  | 0.3635102 | 0.5438778 | Biosynthesis_of_unsaturated_fatty_acids_PATH_ko01040 | Control vs T1D  |
| 710  | 0.2875507 | 0.6495082 | Biosynthesis_of_unsaturated_fatty_acids_PATH_ko01040 | T1D vs T2D      |
| 1102 | 0.6955014 | 0.9028767 | Biosynthesis_of_unsaturated_fatty_acids_PATH_ko01040 | LADA vs T2D     |

# Biosynthesis\_of\_unsaturated\_fatty\_acid

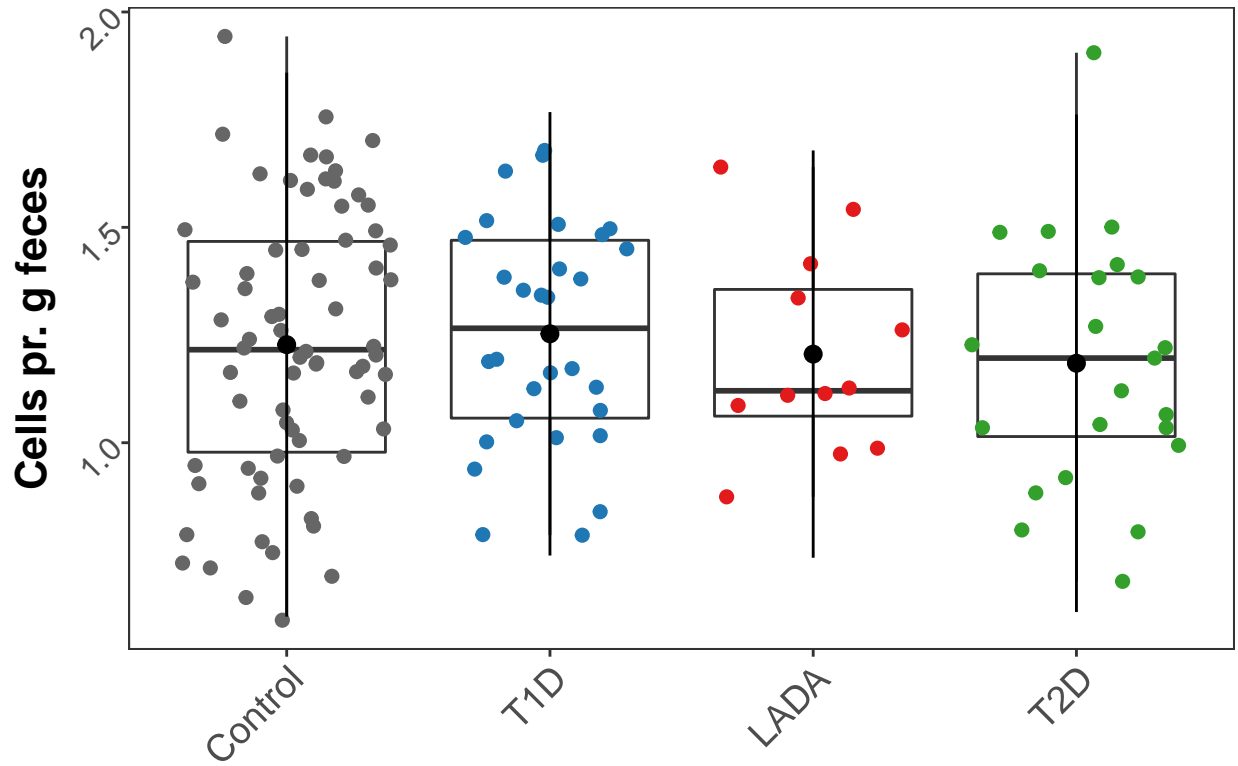

|      | pvalue    | padj      | Genus                           | compare         |
|------|-----------|-----------|---------------------------------|-----------------|
| 382  | 0.0417002 | 0.0773094 | Xylene_degradation_PATH_ko00622 | Control vs T2D  |
| 578  | 0.1229678 | 0.1772183 | Xylene_degradation_PATH_ko00622 | LADA vs Control |
| 186  | 0.1887068 | 0.4762288 | Xylene_degradation_PATH_ko00622 | Control vs T1D  |
| 774  | 0.4647125 | 0.6743371 | Xylene_degradation_PATH_ko00622 | T1D vs T2D      |
| 970  | 0.5678924 | 0.6828644 | Xylene_degradation_PATH_ko00622 | LADA vs T1D     |
| 1166 | 0.9831066 | 0.9986549 | Xylene_degradation_PATH_ko00622 | LADA vs T2D     |

# Xylene\_degradation\_PATH\_ko00622

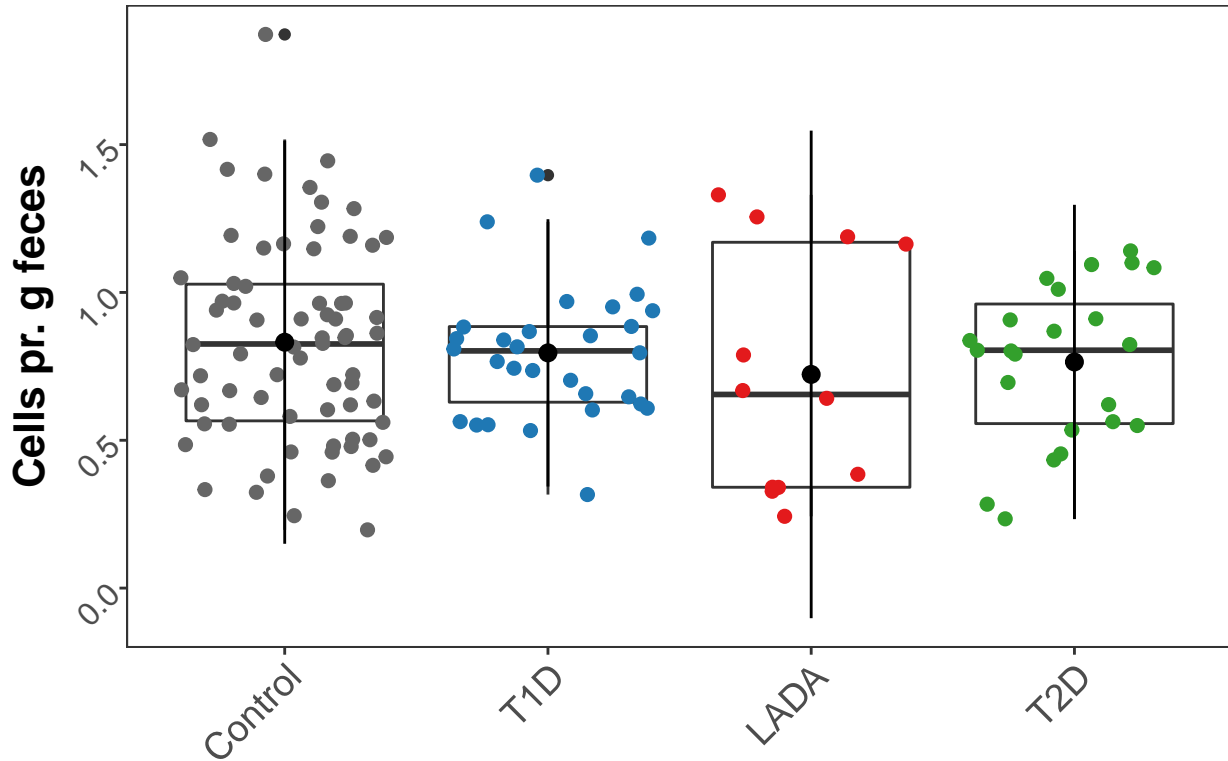

|      | pvalue    | padj      | Genus                               | compare         |
|------|-----------|-----------|-------------------------------------|-----------------|
| 517  | 0.0459308 | 0.0816046 | Fatty_acid_degradation_PATH_ko00071 | LADA vs Control |
| 321  | 0.1042285 | 0.1535510 | Fatty_acid_degradation_PATH_ko00071 | Control vs T2D  |
| 909  | 0.2328950 | 0.3940555 | Fatty_acid_degradation_PATH_ko00071 | LADA vs T1D     |
| 125  | 0.3218636 | 0.5217679 | Fatty_acid_degradation_PATH_ko00071 | Control vs T1D  |
| 713  | 0.5293999 | 0.6917492 | Fatty_acid_degradation_PATH_ko00071 | T1D vs T2D      |
| 1105 | 0.5126303 | 0.8415375 | Fatty_acid_degradation_PATH_ko00071 | LADA vs T2D     |

# Fatty\_acid\_degradation\_PATH\_ko00071

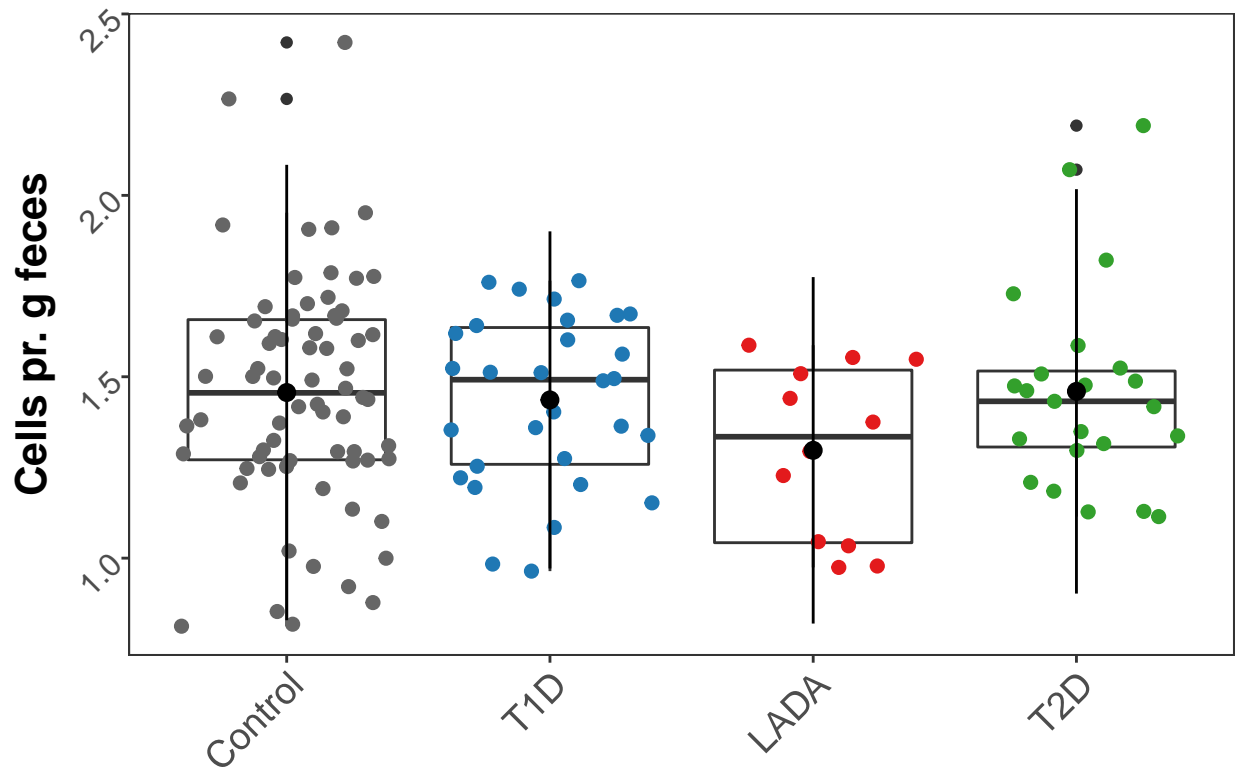

|      | pvalue    | padj      | Genus                           | compare         |
|------|-----------|-----------|---------------------------------|-----------------|
| 494  | 0.0462149 | 0.0816046 | Methane_metabolism_PATH_ko00680 | LADA vs Control |
| 886  | 0.0077757 | 0.1693375 | Methane_metabolism_PATH_ko00680 | LADA vs T1D     |
| 102  | 0.1895196 | 0.4762288 | Methane_metabolism_PATH_ko00680 | Control vs T1D  |
| 298  | 0.4183861 | 0.4966454 | Methane_metabolism_PATH_ko00680 | Control vs T2D  |
| 690  | 0.0827800 | 0.6495082 | Methane_metabolism_PATH_ko00680 | T1D vs T2D      |
| 1082 | 0.2290402 | 0.8415375 | Methane_metabolism_PATH_ko00680 | LADA vs T2D     |

# Methane\_metabolism\_PATH\_ko00680

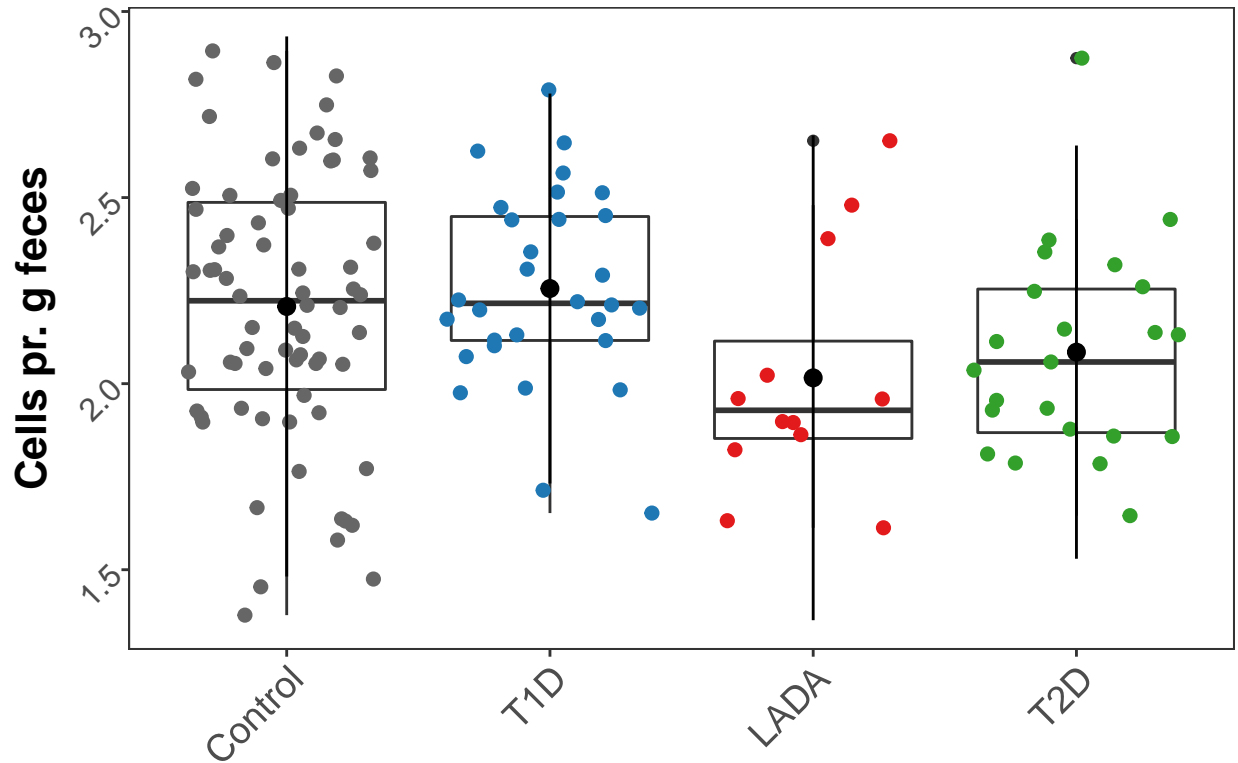

|      | pvalue    | padj      | Genus                                                  | compare        |
|------|-----------|-----------|--------------------------------------------------------|----------------|
| 330  | 0.0465827 | 0.0828378 | Synthesis_and_degradation_of_ketone_bodies_PATH_k00072 | Control vs T2D |
| 526  | 0.0613909 | 0.1002718 | Synthesis_and_degradation_of_ketone_bodies_PATH_k00072 | Control vs T1D |
| 918  | 0.1155838 | 0.2692112 | Synthesis_and_degradation_of_ketone_bodies_PATH_k00072 | Control vs T2D |
| 722  | 0.1196542 | 0.6495082 | Synthesis_and_degradation_of_ketone_bodies_PATH_k00072 | Control vs T1D |
| 134  | 0.8294933 | 0.8835907 | Synthesis_and_degradation_of_ketone_bodies_PATH_k00072 | Control vs T2D |
| 1114 | 0.7655910 | 0.9035121 | Synthesis_and_degradation_of_ketone_bodies_PATH_k00072 | Control vs T1D |

# Synthesis\_and\_degradation\_of\_ketone\_

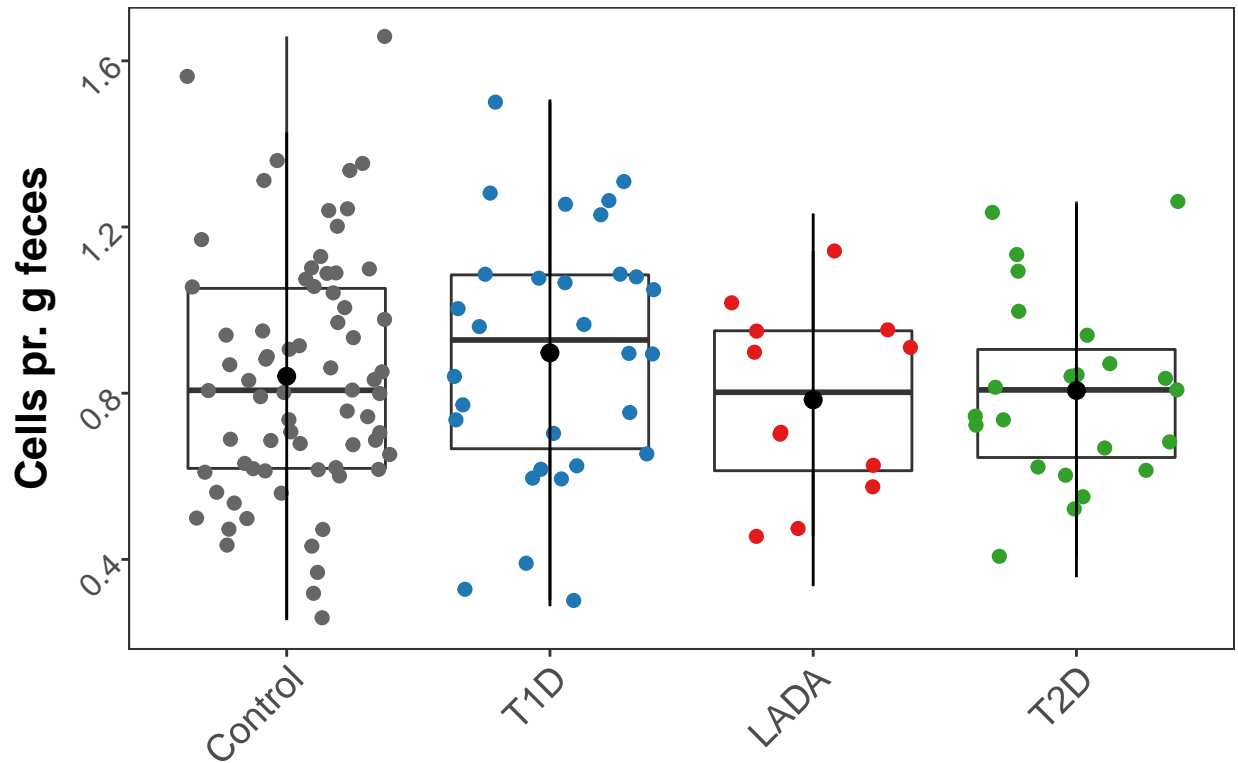

|      | pvalue    | padj      | Genus                           | compare         |
|------|-----------|-----------|---------------------------------|-----------------|
| 258  | 0.0468526 | 0.0828378 | Lysine_degradation_PATH_ko00310 | Control vs T2D  |
| 454  | 0.4294406 | 0.5010140 | Lysine_degradation_PATH_ko00310 | LADA vs Control |
| 650  | 0.2093092 | 0.6495082 | Lysine_degradation_PATH_ko00310 | T1D vs T2D      |
| 62   | 0.5520914 | 0.6970694 | Lysine_degradation_PATH_ko00310 | Control vs T1D  |
| 846  | 0.7316920 | 0.8289689 | Lysine_degradation_PATH_ko00310 | LADA vs T1D     |
| 1042 | 0.5168330 | 0.8415375 | Lysine_degradation_PATH_ko00310 | LADA vs T2D     |



# Lysine\_degradation\_PATH\_ko00310

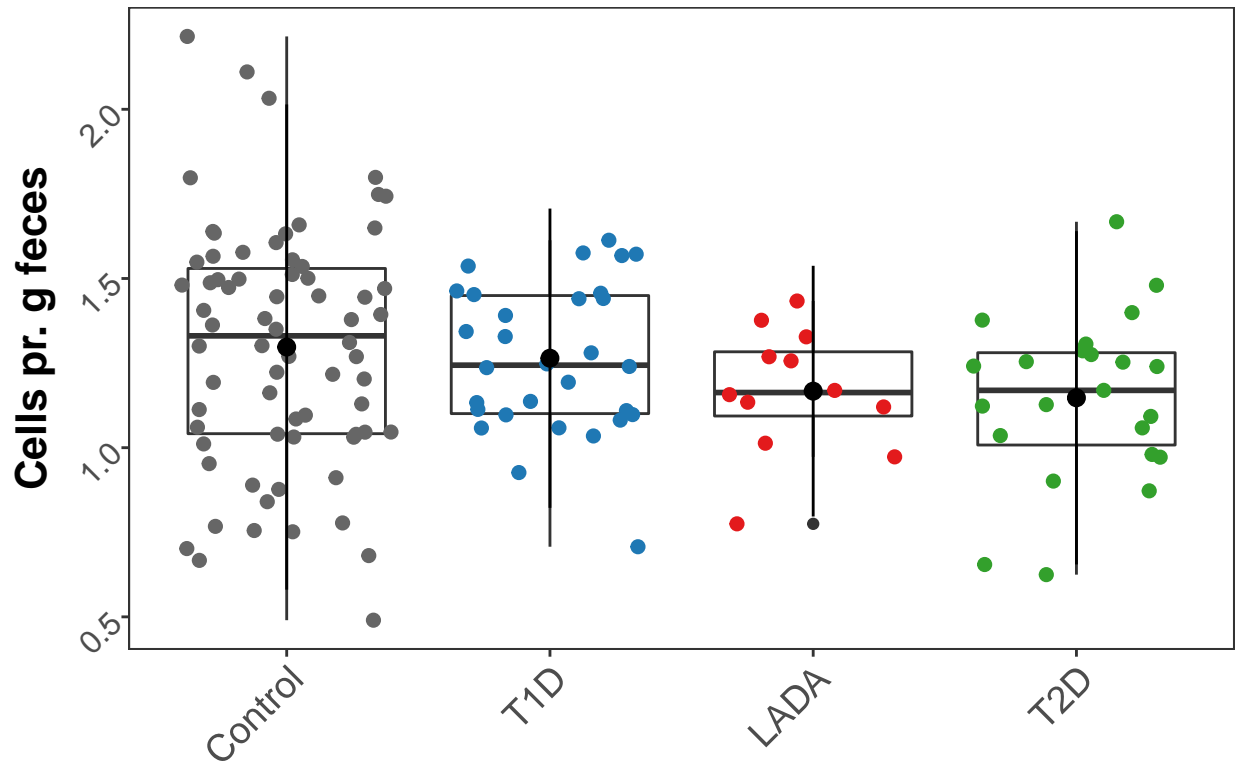

|      | pvalue    | padj      | Genus                            | compare         |
|------|-----------|-----------|----------------------------------|-----------------|
| 380  | 0.0476945 | 0.0828378 | Styrene_degradation_PATH_ko00643 | Control vs T2D  |
| 576  | 0.0493240 | 0.0840653 | Styrene_degradation_PATH_ko00643 | LADA vs Control |
| 968  | 0.1167498 | 0.2692112 | Styrene_degradation_PATH_ko00643 | LADA vs T1D     |
| 772  | 0.1515305 | 0.6495082 | Styrene_degradation_PATH_ko00643 | T1D vs T2D      |
| 184  | 0.7192996 | 0.8056155 | Styrene_degradation_PATH_ko00643 | Control vs T1D  |
| 1164 | 0.6977563 | 0.9028767 | Styrene_degradation_PATH_ko00643 | LADA vs T2D     |

# Styrene\_degradation\_PATH\_ko00643

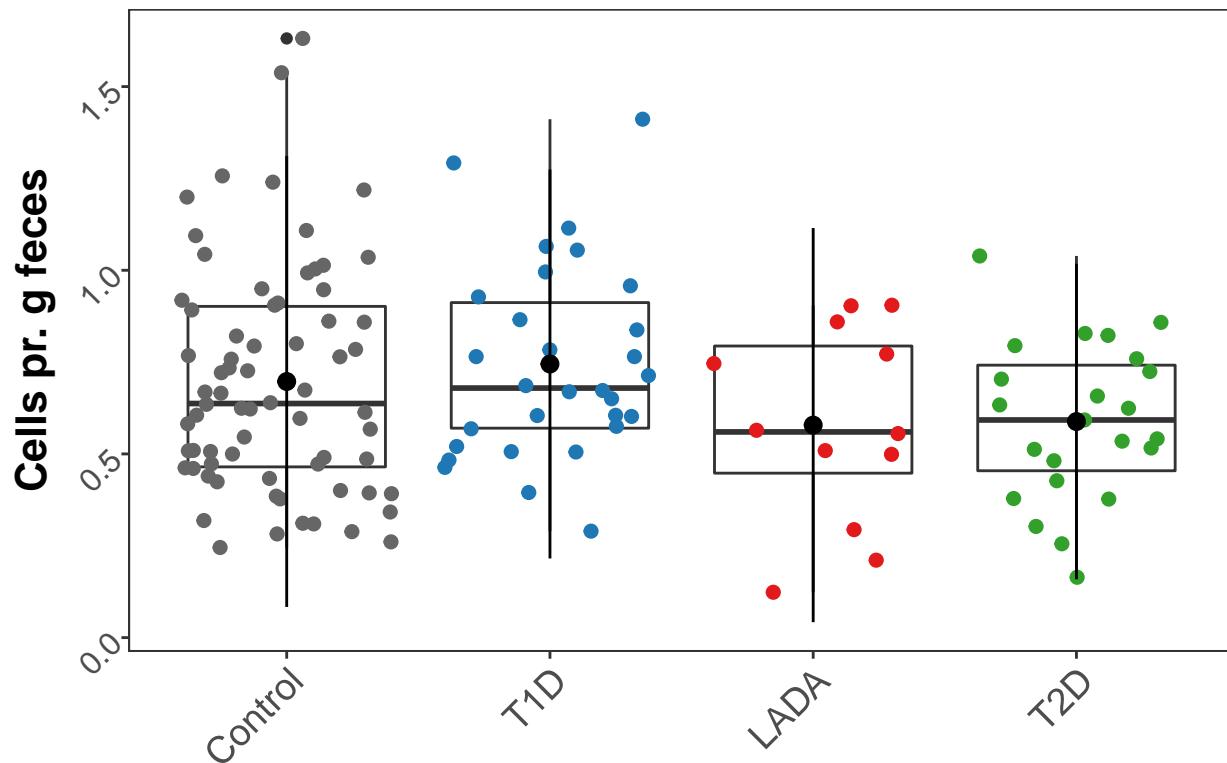

|      | pvalue    | padj      | Genus                                                        | compare      |
|------|-----------|-----------|--------------------------------------------------------------|--------------|
| 371  | 0.0482554 | 0.0829389 | Chlorocyclohexane_and_chlorobenzene_degradation_PATH_ko00643 | Control T2D  |
| 567  | 0.5216851 | 0.5809675 | Chlorocyclohexane_and_chlorobenzene_degradation_PATH_ko00643 | Control LADA |
| 959  | 0.4736233 | 0.6100058 | Chlorocyclohexane_and_chlorobenzene_degradation_PATH_ko00643 | Control T1D  |
| 763  | 0.0609790 | 0.6495082 | Chlorocyclohexane_and_chlorobenzene_degradation_PATH_ko00643 | T1D T2D      |
| 1155 | 0.4407326 | 0.8415375 | Chlorocyclohexane_and_chlorobenzene_degradation_PATH_ko00643 | LADA T2D     |
| 175  | 0.8381750 | 0.8851806 | Chlorocyclohexane_and_chlorobenzene_degradation_PATH_ko00643 | Control T1D  |

# Chlorocyclohexane\_and\_chlorobenzene

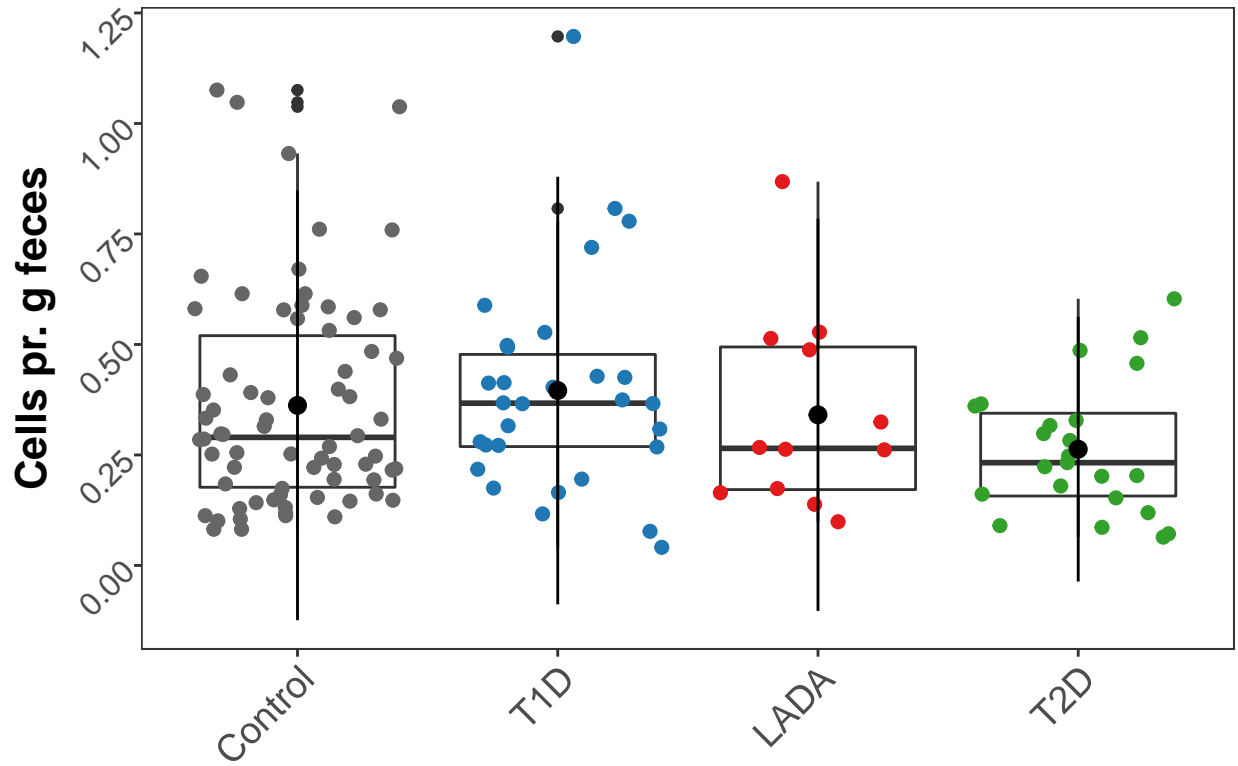

|     | pvalue    | padj      | Genus                   | compare         |
|-----|-----------|-----------|-------------------------|-----------------|
| 410 | 0.0508860 | 0.0859799 | Peroxisome_PATH_ko04146 | LADA vs Control |
| 214 | 0.2592456 | 0.3292047 | Peroxisome_PATH_ko04146 | Control vs T2D  |
| 802 | 0.2503840 | 0.3957683 | Peroxisome_PATH_ko04146 | LADA vs T1D     |
| 18  | 0.3190838 | 0.5217679 | Peroxisome_PATH_ko04146 | Control vs T1D  |
| 998 | 0.3412941 | 0.8415375 | Peroxisome_PATH_ko04146 | LADA vs T2D     |
| 606 | 0.8462895 | 0.8870200 | Peroxisome_PATH_ko04146 | T1D vs T2D      |

# Peroxisome\_PATH\_ko04146

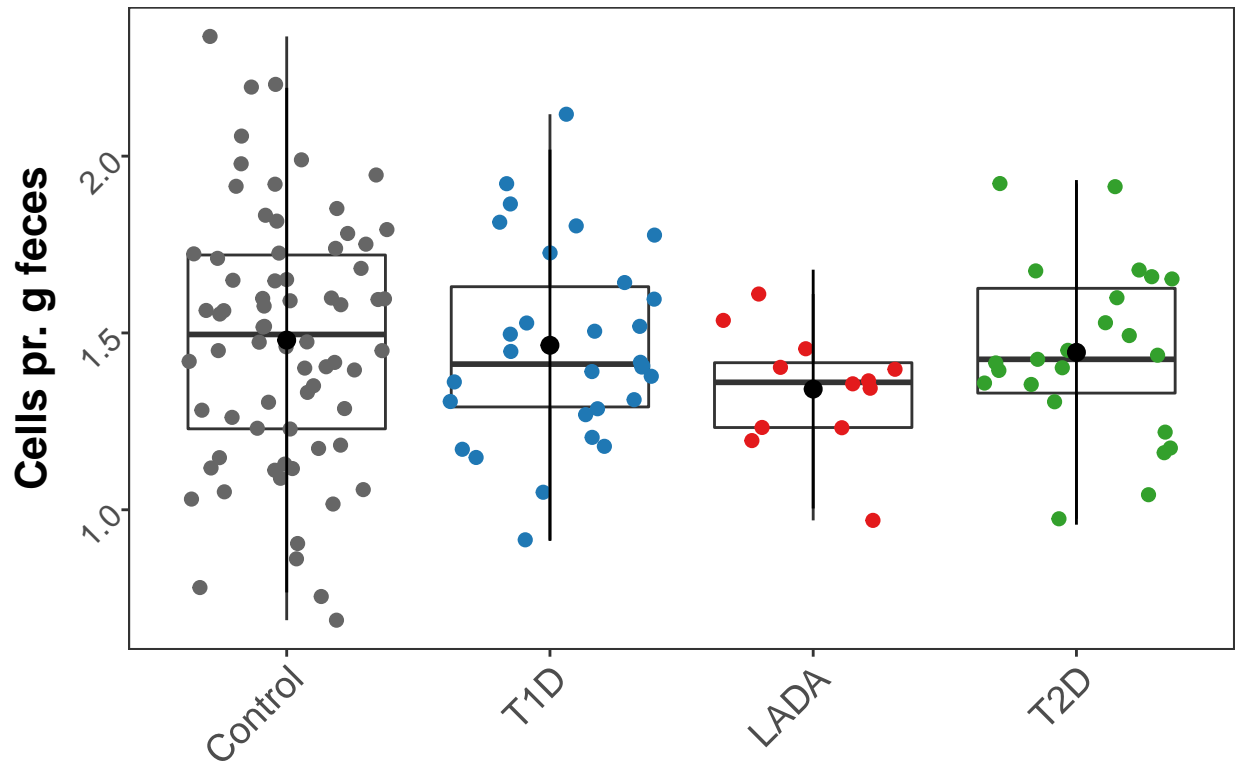

|      | pvalue    | padj      | Genus                                            | compare         |
|------|-----------|-----------|--------------------------------------------------|-----------------|
| 506  | 0.0551464 | 0.0910330 | Mannose_type_O_glycan_biosynthesis_PATH_ko005115 | LADA vs Control |
| 898  | 0.2838597 | 0.4244349 | Mannose_type_O_glycan_biosynthesis_PATH_ko005115 | LADA vs T1D     |
| 114  | 0.2858122 | 0.5040976 | Mannose_type_O_glycan_biosynthesis_PATH_ko005115 | Control vs T1D  |
| 702  | 0.3445426 | 0.6495082 | Mannose_type_O_glycan_biosynthesis_PATH_ko005115 | T1D vs T2D      |
| 1094 | 0.0777549 | 0.8415375 | Mannose_type_O_glycan_biosynthesis_PATH_ko005115 | LADA vs T2D     |
| 310  | 0.9037870 | NA        | Mannose_type_O_glycan_biosynthesis_PATH_ko005115 | Control vs T2D  |

# Mannose\_type\_O\_glycan\_biosynthesis\_

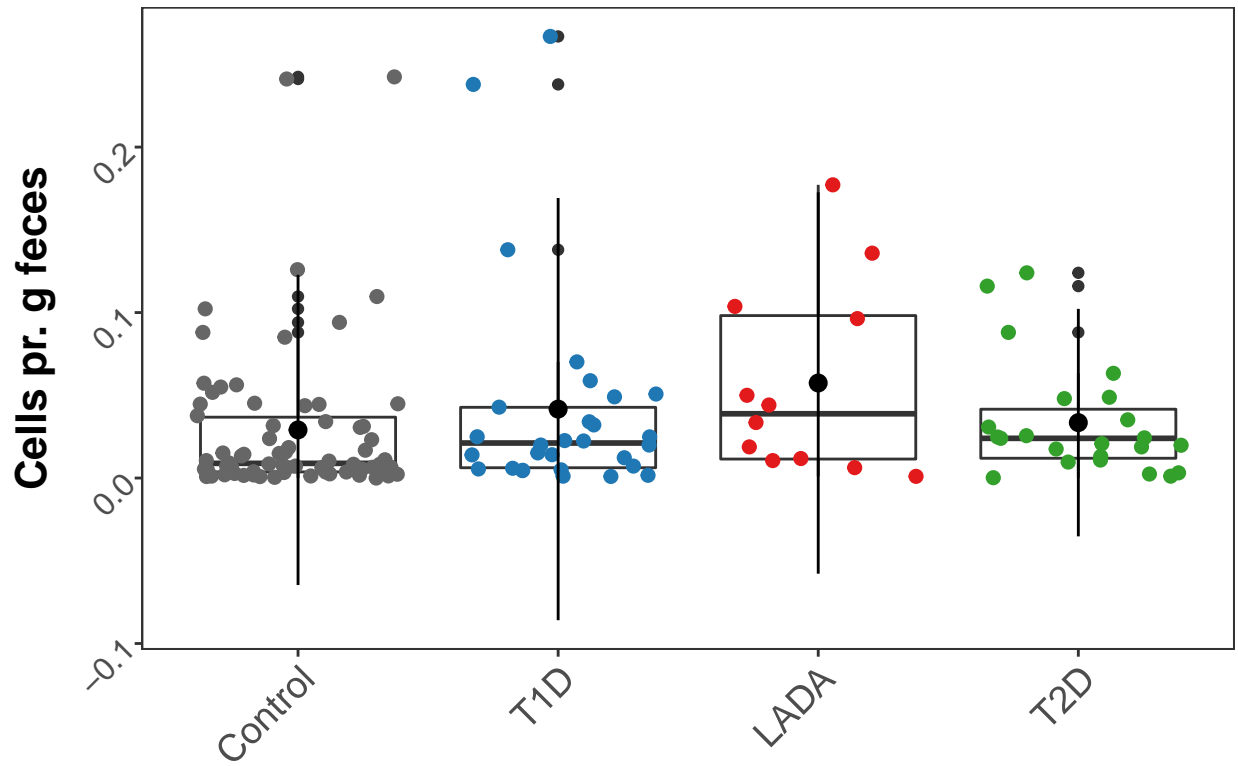

|      | pvalue    | padj      | Genus                                  | compare         |
|------|-----------|-----------|----------------------------------------|-----------------|
| 481  | 0.0552700 | 0.0910330 | Citrate_cycle__TCA_cycle__PATH_ko00020 | LADA vs Control |
| 285  | 0.1448769 | 0.1975594 | Citrate_cycle__TCA_cycle__PATH_ko00020 | Control vs T2D  |
| 873  | 0.0450772 | 0.2312928 | Citrate_cycle__TCA_cycle__PATH_ko00020 | LADA vs T1D     |
| 677  | 0.1156899 | 0.6495082 | Citrate_cycle__TCA_cycle__PATH_ko00020 | T1D vs T2D      |
| 89   | 0.6948470 | 0.7863905 | Citrate_cycle__TCA_cycle__PATH_ko00020 | Control vs T1D  |
| 1069 | 0.4853153 | 0.8415375 | Citrate_cycle__TCA_cycle__PATH_ko00020 | LADA vs T2D     |

# Citrate\_cycle\_\_TCA\_cycle\_\_PATH\_ko00060

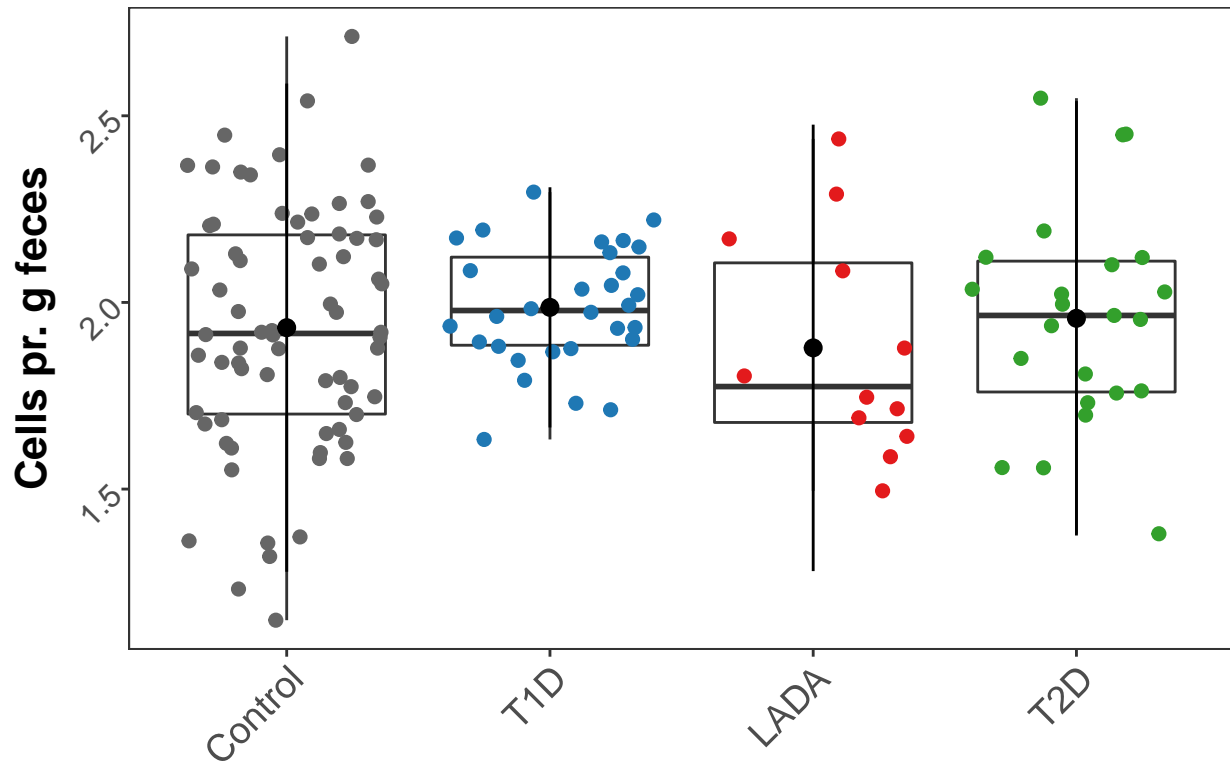

|      | pvalue    | padj      | Genus                              | compare         |
|------|-----------|-----------|------------------------------------|-----------------|
| 261  | 0.0535643 | 0.0911146 | Tryptophan_metabolism_PATH_ko00380 | Control vs T2D  |
| 653  | 0.1374214 | 0.6495082 | Tryptophan_metabolism_PATH_ko00380 | T1D vs T2D      |
| 457  | 0.7965545 | 0.8304504 | Tryptophan_metabolism_PATH_ko00380 | LADA vs Control |
| 1045 | 0.2816343 | 0.8415375 | Tryptophan_metabolism_PATH_ko00380 | LADA vs T2D     |
| 65   | 0.8107696 | 0.8779605 | Tryptophan_metabolism_PATH_ko00380 | Control vs T1D  |
| 849  | 0.9339681 | 0.9691189 | Tryptophan_metabolism_PATH_ko00380 | LADA vs T1D     |

# Tryptophan\_metabolism\_PATH\_ko00380

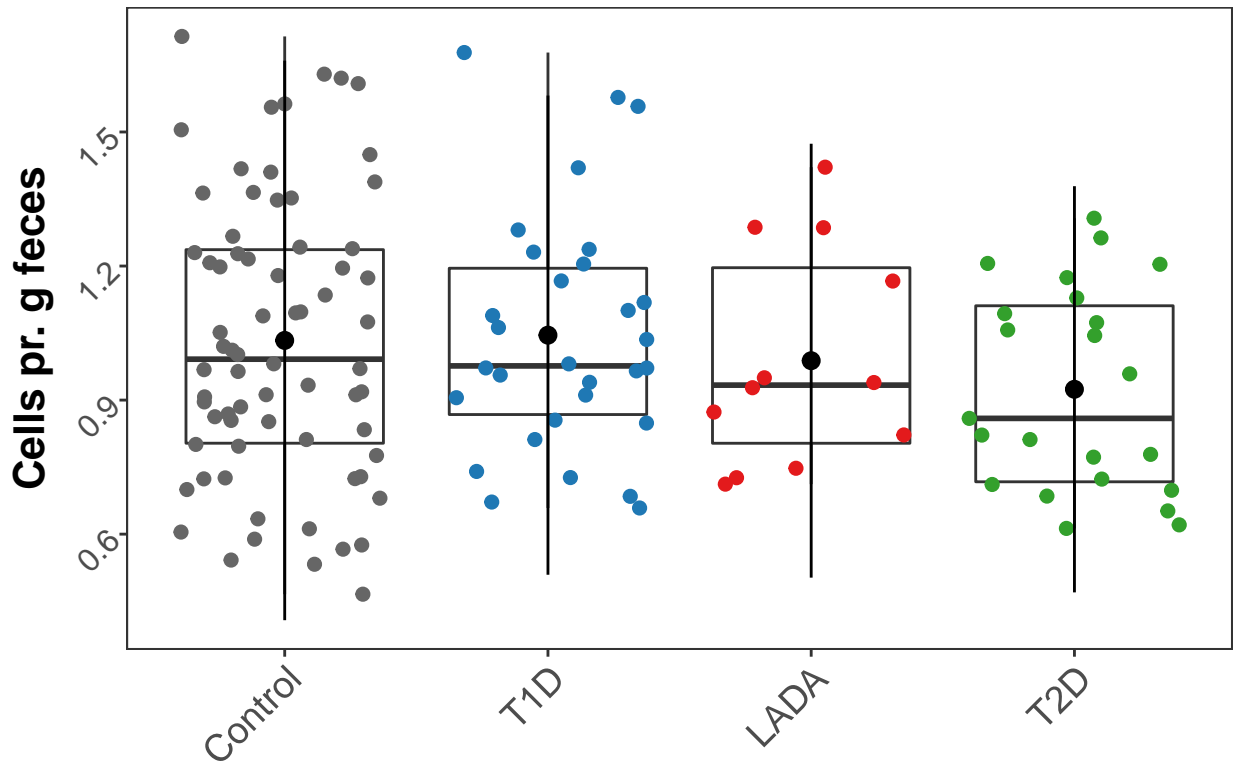

|      | pvalue    | padj      | Genus                           | compare         |
|------|-----------|-----------|---------------------------------|-----------------|
| 372  | 0.0615338 | 0.0996512 | Dioxin_degradation_PATH_ko00621 | Control vs T2D  |
| 568  | 0.1144990 | 0.1689666 | Dioxin_degradation_PATH_ko00621 | LADA vs Control |
| 176  | 0.1593391 | 0.4612224 | Dioxin_degradation_PATH_ko00621 | Control vs T1D  |
| 960  | 0.5860194 | 0.7003646 | Dioxin_degradation_PATH_ko00621 | LADA vs T1D     |
| 764  | 0.6077607 | 0.7461523 | Dioxin_degradation_PATH_ko00621 | T1D vs T2D      |
| 1156 | 0.9021828 | 0.9769493 | Dioxin_degradation_PATH_ko00621 | LADA vs T2D     |

# Dioxin\_degradation\_PATH\_ko00621

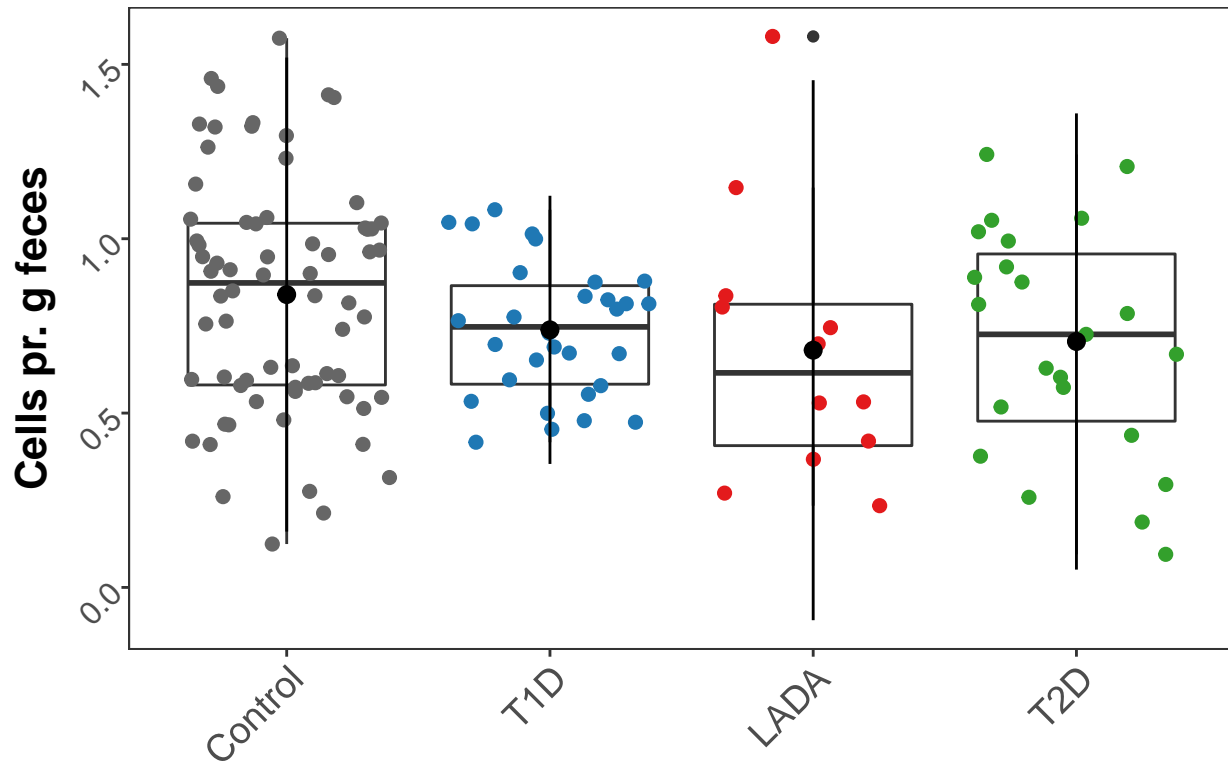

```
lay <- rbind(c(1,2,3))
pdf(paste("MicroLADA_GeneraDARemMet_Func.pdf", sep=""), width=15, height=5)
grid.arrange(Fig2List$alpha_Linolenic_acid_metabolism_PATH_ko00592,
              Fig2List$Geraniol_degradation_PATH_ko00281,
              Fig2List$Bacterial_chemotaxis_PATH_ko02030, layout_matrix = lay)
dev.off()
```

pdf 2

```
#ggplot(Plotting2, aes(x=BMI, y=Actinomyces)) +
# geom_point()
```

## Create figure 2

Investigating grouping diagnosis. Which group does LADA resemble the most and which are different from each other.

```
#Have the plots stored in list
lay <- rbind(c(1,2,3),
             c(4,5,6))

pdf(paste("MicroLADA_Figure2_Func.pdf", sep=""), width=15, height=10)
grid.arrange(Fig2List$vulcLadaT1D,
```



```

Fig2List$vulcLadaT2D,
Fig2List$vulcLadaControl,
Fig2List$Geraniol_degradation_PATH_ko00281,
Fig2List$Carotenoid_biosynthesis_PATH_ko00906,
Fig2List$Retinol_metabolism_PATH_ko00830, layout_matrix = lay)
dev.off()

```

```

## pdf
## 2

```

```

pdf(paste("MicroLADA_Figure2RemMet_Func.pdf", sep=""), width=15, height=10)
grid.arrange(Fig2ListRemMet$vulcLadaT1D,
Fig2ListRemMet$vulcLadaT2D,
Fig2ListRemMet$vulcLadaControl,
Fig2ListRemMet$Geraniol_degradation_PATH_ko00281,
Fig2ListRemMet$alpha_Linolenic_acid_metabolism_PATH_ko00592,
Fig2ListRemMet$Bacterial_chemotaxis_PATH_ko02030, layout_matrix = lay)
dev.off()

```

```

## pdf
## 2

```

## DESeq heatmap

Figure 3

Many models to be included so all validation plots are removed. Includes both LRT and Wald Structured to be compatible with creating af heatmap. Includes a dataframe of log2-fold changes a dataframe of padj and afterwards creating a dataframe containing symbols for significance levels. Density plot based on the log2-fold changes.

```

rm(list=setdiff(ls(), c("Metadata", "MetadataMed", "Feature", "TaxonomyDA", "Taxonomy")))

#Reassign names
Metadata2<-Metadata
Taxonomy2<-TaxonomyDA

#The factor can not be ordered for DESeq to run
Metadata2$Diagnosis<-factor(Metadata2$Diagnosis, ordered=FALSE)
##Other
#Metadata2$BMIq<-factor(Metadata2$BMIq)

##LRT none
#Create design formula
design <- formula(paste("~ ", "Diagnosis"))
#Create DESeq2 object with matrix and metadata
dds <- DESeqDataSetFromMatrix(countData = Taxonomy2,
                              colData = Metadata2,
                              design = design)

##Assess and calculate size factors using the different methods

```

```

SF<-data.frame(Ratio=sizeFactors(estimateSizeFactors(dds, type="ratio")),
  Poscounts=sizeFactors(estimateSizeFactors(dds, type="poscounts")),
  Iterate=sizeFactors(estimateSizeFactors(dds, type="poscounts")),
  #"iterate" takes a lot of time changed to "poscounts" but kept due to the
  #following code
  Relative=colSums(Taxonomy2)/mean(colSums(Taxonomy2))
)
SF<-add_rownames(SF, var="MicrobiomeID")
#Adding total abundances
path <- paste("J:/",
  "CBMR/",
  "SUN-CBMR-Hansen-Group/",
  "Projects/",
  "LADA/",
  "LADA_Sandra_Evelina/",
  "LADA_JKV/",
  "LADA_R_AfterFlow_Analysis_FinalCounts/",
  "LADA_FinalCounts/",
  "2019-09-03_CountAnalysis.rds", sep="")
TotalCounts<-readRDS(path)
TotalCountsProcess <-
  data.frame(MicrobiomeID=TotalCounts$DF_Save_w$ID,
    CellNorm=TotalCounts$DF_Save_w$Cells_per_g_feces_FR_corrected_mean)
TotalCountsProcess$MicrobiomeID <- paste("L", TotalCountsProcess$MicrobiomeID,
  sep="")
SF2<-merge(SF, TotalCountsProcess, by="MicrobiomeID")

#One value is NaN in sample 602059 assigns value as average
SF2$CellNorm[is.nan(SF2$CellNorm)]<-mean(na.omit(SF2$CellNorm))
SF2$CellNormStand<-SF2$CellNorm/mean(SF2$CellNorm) #Watch out for NaN values can assign
#average, but wants the error

SF3<-merge(Metadata2, SF2, by="MicrobiomeID")
#DESeq divides with sizeFactor (High cell count should have low sizeFactor providing
#larger counts in a sample)
#Still have to consider seq data is relative
SF3$NormRelCell<-SF3$Relative/SF3$CellNormStand

##Select size factors calculated above for normalization
dds@colData@listData$sizeFactor <- SF3[,20]
#hist(dds@colData@listData$sizeFactor)
#colnames(SF3[13])
normname<-colnames(SF3[20])

##See vignette for note on factor levels
#Filtering of the Counttable. Bare minimum is performed later. Also to reduce memory of
#the dds
dds2 <- dds[ rowSums(counts(dds))>50*length(Taxonomy2),] #Previously 0 instead of 1

#Estimate dispersions and fit the GLM
dds2 <- DESeq(dds2, test="LRT", reduced = ~1)

res<-results(dds2)
summary(res)

```

```
##
## out of 197 with nonzero total read count
## adjusted p-value < 0.1
## LFC > 0 (up)      : 15, 7.6%
## LFC < 0 (down)    : 2, 1%
## outliers [1]      : 0, 0%
## low counts [2]    : 0, 0%
## (mean count < 57)
## [1] see 'cooksCutoff' argument of ?results
## [2] see 'independentFiltering' argument of ?results
```

```
resultsNames(dds2)
```

```
## [1] "Intercept"          "Diagnosis_T1D_vs_Control"
## [3] "Diagnosis_LADA_vs_Control" "Diagnosis_T2D_vs_Control"
```

```
#Data structuring
```

```
df <- data.frame(res)
df <- tibble::rownames_to_column(df, "Genera")
#After this it is a select and change naming, then merge
df_log2 <- df %>% select(one_of("Genera", "log2FoldChange")) %>%
  dplyr::rename("LRT none"="log2FoldChange")

df_padj <- df %>% select(one_of("Genera", "padj")) %>%
  dplyr::rename("LRT none"="padj")
```

```
##Wald none
```

```
#Create design formula
```

```
design <- formula(paste("~ ", "Diagnosis"))
#Create DESeq2 object with matrix and metadata
dds <- DESeqDataSetFromMatrix(countData = Taxonomy2,
                              colData = Metadata2,
                              design = design)
```

```
##Select size factors calculated above for normalization
```

```
dds@colData@listData$sizeFactor <- SF3[,20]
```

```
##See vignette for note on factor levels
```

```
#Filtering of the Counttable. Bare minimum is performed later. Also to reduce memory of
```

```
#the dds
```

```
dds <- dds[ rowSums(counts(dds))>(50*length(Taxonomy2)),] #Previously 0 instead of 1
```

```
#Estimate dispersions and fit the GLM
```

```
dds <- DESeq(dds)
```

```
res<-results(dds)
summary(res)
```

```
##
## out of 197 with nonzero total read count
## adjusted p-value < 0.1
## LFC > 0 (up)      : 14, 7.1%
## LFC < 0 (down)    : 0, 0%
## outliers [1]     : 0, 0%
## low counts [2]    : 0, 0%
## (mean count < 57)
## [1] see 'cooksCutoff' argument of ?results
## [2] see 'independentFiltering' argument of ?results
```

```
resultsNames(dds)
```

```
## [1] "Intercept"          "Diagnosis_T1D_vs_Control"
## [3] "Diagnosis_LADA_vs_Control" "Diagnosis_T2D_vs_Control"
```

```
#Threshold for FDR-adjusted p-values
```

```
padj_threshold <- 0.1
```

```
if (is.factor(colData(dds)[,"Diagnosis"]) == TRUE) {
```

```
#Find all two-wise combinations of levels in chosen test factor
```

```
test <- combn(levels(colData(dds)[,"Diagnosis"]), 2)
```

```
test[,4]<-c("LADA", "T1D") #Want LADA first
```

```
foo = test[1,]
```

```
poo = test[2,]
```

```
#Do DESeq2 analysis on all combinations of levels and save as list
```

```
result <- vector("list",length(foo))
```

```
for (i in 1:length(foo) ) {
```

```
  for (j in 1:length(poo)) {
```

```
    result[i] = results(dds, contrast = c("Diagnosis" ,foo[i], poo[i]))
```

```
  }
```

```
}
```

```
#Produce output tables with significant taxa from each comparison
```

```
res_list <- vector("list",length(foo))
```

```
for (i in 1:length(result) ) {
```

```
  res_stat <- data.frame(result[i])
```

```
  res_stat <- res_stat[is.na(res_stat$pvalue) == FALSE,]
```

```
  stat_sig <- na.omit(res_stat[res_stat$padj < padj_threshold,])
```

```
  res_stat$gene <- rownames(res_stat)
```

```
  res_stat$g1 <- test[1,i]
```

```
  res_stat$g2 <- test[2,i]
```

```
  res_stat$compare <- paste(test[1,i], "vs", test[2,i])
```

```
  res_list[i] <- list(res_stat)
```

```
}
```

```
res_stat <- do.call('cbind', res_list)
```

```

#rownames(res_stat) <- 1:nrow(res_stat)
#res_stat <- res_stat[with(res_stat, order(padj, pvalue, abs(log2FoldChange))),]
#stat_sig <- na.omit(res_stat[res_stat$padj < padj_threshold,])
}

```

```

((res_stat[,7]==res_stat[,17])==res_stat[,27]==res_stat[,37]))==
((res_stat[,47]==res_stat[,57]))

```

```

## [1] TRUE TRUE
## [16] TRUE TRUE
## [31] TRUE TRUE
## [46] TRUE TRUE
## [61] TRUE TRUE
## [76] TRUE TRUE
## [91] TRUE TRUE
## [106] TRUE TRUE
## [121] TRUE TRUE
## [136] TRUE TRUE
## [151] TRUE TRUE
## [166] TRUE TRUE
## [181] TRUE TRUE
## [196] TRUE TRUE

```

```

#testordernone<-res_stat[2,c(10,20,30,40,50,60)]
df_log2_merge <- res_stat[,c(7,12,2,22,32,52,42)]
colnames(df_log2_merge)<- c("Genera", "No adj - Control vs. LADA", "No adj - Control vs. T1D",
                           "No adj - Control vs. T2D", "No adj - LADA vs. T1D",
                           "No adj - LADA vs. T2D", "No adj - T1D vs. T2D")
df_log2 <- merge(df_log2, df_log2_merge, by="Genera")

df_padj_merge <- res_stat[,c(7,16,6,26,36,56,46)]
colnames(df_padj_merge)<- c("Genera", "No adj - Control vs. LADA", "No adj - Control vs. T1D",
                           "No adj - Control vs. T2D", "No adj - LADA vs. T1D",
                           "No adj - LADA vs. T2D", "No adj - T1D vs. T2D")
df_padj <- merge(df_padj, df_padj_merge, by="Genera")

```

```

##LRT BMIq
#Create design formula
design <- formula(paste("~ ", "Diagnosis", "+", "BMIq"))
#Create DESeq2 object with matrix and metadata
dds <- DESeqDataSetFromMatrix(countData = Taxonomy2,
                              colData = Metadata2,
                              design = design)

##Assess and calculate size factors using the different methods
SF<-data.frame(Ratio=sizeFactors(estimateSizeFactors(dds, type="ratio")),

```

```

        Poscounts=sizeFactors(estimateSizeFactors(dds, type="poscounts")),
        Iterate=sizeFactors(estimateSizeFactors(dds, type="poscounts")),
        #"iterate" takes a lot of time changed to "poscounts" but kept due to the
        #following code
        Relative=colSums(Taxonomy2)/mean(colSums(Taxonomy2))
    )
SF<-add_rownames(SF, var="MicrobiomeID")
#Adding total abundances
TotalCounts<-readRDS(path)
TotalCountsProcess <-
  data.frame(MicrobiomeID=TotalCounts$DF_Save_w$ID,
             CellNorm=TotalCounts$DF_Save_w$Cells_per_g_feces_FR_corrected_mean)
TotalCountsProcess$MicrobiomeID <- paste("L", TotalCountsProcess$MicrobiomeID,
                                         sep="")
SF2<-merge(SF, TotalCountsProcess, by="MicrobiomeID")

#One value is NaN in sample 602059 assigns value as average
SF2$CellNorm[is.nan(SF2$CellNorm)]<-mean(na.omit(SF2$CellNorm))
SF2$CellNormStand<-SF2$CellNorm/mean(SF2$CellNorm) #Watch out for NaN values can assign
#average, but wants the error

SF3<-merge(Metadata2, SF2, by="MicrobiomeID")
#DESeq divides with sizeFactor (High cell count should have low sizeFactor providing
#larger counts in a sample)
#Still have to consider seq data is relative
SF3$NormRelCell<-SF3$Relative/SF3$CellNormStand

##Select size factors calculated above for normalization
dds@colData@listData$sizeFactor <- SF3[,20]
#hist(dds@colData@listData$sizeFactor)
#colnames(SF3[13])
normname<-colnames(SF3[20])

##See vignette for note on factor levels
#Filtering of the Counttable. Bare minimum is performed later. Also to reduce memory of
#the dds
dds2 <- dds[ rowSums(counts(dds))>50*length(Taxonomy2),] #Previously 0 instead of 1

#Estimate dispersions and fit the GLM
dds2 <- DESeq(dds2, test="LRT", reduced = ~BMIq)

res<-results(dds2)
summary(res)

##
## out of 197 with nonzero total read count
## adjusted p-value < 0.1
## LFC > 0 (up)      : 11, 5.6%
## LFC < 0 (down)   : 3, 1.5%
## outliers [1]     : 0, 0%
## low counts [2]   : 0, 0%
## (mean count < 64)
## [1] see 'cooksCutoff' argument of ?results
## [2] see 'independentFiltering' argument of ?results

```

```
resultsNames(dds2)
```

```
## [1] "Intercept" "Diagnosis_T1D_vs_Control"  
## [3] "Diagnosis_LADA_vs_Control" "Diagnosis_T2D_vs_Control"  
## [5] "BMIq"
```

```
#Data structuring
```

```
df <- data.frame(res)  
df <- tibble::rownames_to_column(df, "Genera")  
#After this it is a select and change naming, then merge  
df_log2_merge <- df %>% select(one_of("Genera", "log2FoldChange")) %>%  
  dplyr::rename("LRT BMI"="log2FoldChange")  
df_log2 <- merge(df_log2, df_log2_merge, by="Genera")  
  
df_padj_merge <- df %>% select(one_of("Genera", "padj")) %>%  
  dplyr::rename("LRT BMI"="padj")  
df_padj <- merge(df_padj, df_padj_merge, by="Genera")
```

```
##Wald BMI
```

```
#Create design formula  
design <- formula(paste("~ ", "Diagnosis", "+", "BMIq"))  
#Create DESeq2 object with matrix and metadata  
dds <- DESeqDataSetFromMatrix(countData = Taxonomy2,  
  colData = Metadata2,  
  design = design)
```

```
##Select size factors calculated above for normalization
```

```
dds@colData@listData$sizeFactor <- SF3[,20]
```

```
##See vignette for note on factor levels
```

```
#Filtering of the Counttable. Bare minimum is performed later. Also to reduce memory of
```

```
#the dds
```

```
dds <- dds[ rowSums(counts(dds))>(50*length(Taxonomy2)),] #Previously 0 instead of 1
```

```
#Estimate dispersions and fit the GLM
```

```
dds <- DESeq(dds)
```

```
res<-results(dds)
```

```
summary(res)
```

```
##
```

```
## out of 197 with nonzero total read count
```

```
## adjusted p-value < 0.1
```

```
## LFC > 0 (up) : 0, 0%
```

```
## LFC < 0 (down) : 0, 0%
```

```
## outliers [1] : 0, 0%
```

```
## low counts [2] : 0, 0%
```

```
## (mean count < 64)
## [1] see 'cooksCutoff' argument of ?results
## [2] see 'independentFiltering' argument of ?results
```

```
resultsNames(dds)
```

```
## [1] "Intercept"           "Diagnosis_T1D_vs_Control"
## [3] "Diagnosis_LADA_vs_Control" "Diagnosis_T2D_vs_Control"
## [5] "BMIq"
```

```
#Threshold for FDR-adjusted p-values
```

```
padj_threshold <- 0.1
```

```
if (is.factor(colData(dds)[,"Diagnosis"]) == TRUE) {
```

```
#Find all two-wise combinations of levels in chosen test factor
```

```
test <- combn(levels(colData(dds)[,"Diagnosis"]), 2)
```

```
test[,4]<-c("LADA", "T1D") #Want LADA first
```

```
foo = test[1,]
```

```
poo = test[2,]
```

```
#Do DESeq2 analysis on all combinations of levels and save as list
```

```
result <- vector("list",length(foo))
```

```
for (i in 1:length(foo) ) {
```

```
  for (j in 1:length(poo)) {
```

```
    result[i] = results(dds, contrast = c("Diagnosis" ,foo[i], poo[i]))
```

```
  }
```

```
}
```

```
#Produce output tables with significant taxa from each comparison
```

```
res_list <- vector("list",length(foo))
```

```
for (i in 1:length(result) ) {
```

```
  res_stat <- data.frame(result[i])
```

```
  res_stat <- res_stat[is.na(res_stat$pvalue) == FALSE,]
```

```
  stat_sig <- na.omit(res_stat[res_stat$padj < padj_threshold,])
```

```
  res_stat$gene <- rownames(res_stat)
```

```
  res_stat$g1 <- test[1,i]
```

```
  res_stat$g2 <- test[2,i]
```

```
  res_stat$compare <- paste(test[1,i], "vs", test[2,i])
```

```
  res_list[i] <- list(res_stat)
```

```
}
```

```
res_stat <- do.call('cbind', res_list)
```

```
#rownames(res_stat) <- 1:nrow(res_stat)
```

```
#res_stat <- res_stat[with(res_stat, order(padj, pvalue, abs(log2FoldChange))),]
```

```
#stat_sig <- na.omit(res_stat[res_stat$padj < padj_threshold,])
```

```
}
```

```
((res_stat[,7]==res_stat[,17])==res_stat[,27]==res_stat[,37]))==
```

```
((res_stat[,47]==res_stat[,57]))
```

```
## [1] TRUE TRUE
## [16] TRUE TRUE
```



```

## [31] TRUE TRUE
## [46] TRUE TRUE
## [61] TRUE TRUE
## [76] TRUE TRUE
## [91] TRUE TRUE
## [106] TRUE TRUE
## [121] TRUE TRUE
## [136] TRUE TRUE
## [151] TRUE TRUE
## [166] TRUE TRUE
## [181] TRUE TRUE
## [196] TRUE TRUE

```

```

#testorderBMI<-res_stat[2,c(10,20,30,40,50,60)]
#testordernone==testorderBMI
df_log2_merge <- res_stat[,c(7,12,2,22,32,52,42)]
colnames(df_log2_merge)<- c("Genera", "BMI - Control vs. LADA", "BMI - Control vs. T1D",
                           "BMI - Control vs. T2D", "BMI - LADA vs. T1D",
                           "BMI - LADA vs. T2D", "BMI - T1D vs. T2D")
df_log2 <- merge(df_log2, df_log2_merge, by="Genera")

df_padj_merge <- res_stat[,c(7,16,6,26,36,56,46)]
colnames(df_padj_merge)<- c("Genera", "BMI - Control vs. LADA", "BMI - Control vs. T1D",
                           "BMI - Control vs. T2D", "BMI - LADA vs. T1D",
                           "BMI - LADA vs. T2D", "BMI - T1D vs. T2D")
df_padj <- merge(df_padj, df_padj_merge, by="Genera")

```

```

##LRT metformin
#Instead of adding to formula removes them from datasets since it is only present in some
#groups
##Removing treated with metformin
#Metadata$Metformin <- ifelse(is.na(Metadata$Metformin), "Unknown", Metadata$Metformin)
Metadata2<-filter(Metadata, !Metformin == 1)
table(Metadata2$Diagnosis)

```

```

##
## Control      T1D      LADA      T2D
##          70       30       12       23

```

```

##Applying subsetting to OTU tables
Taxonomy2<-dplyr::select(Taxonomy, one_of(as.character(Metadata2$MicrobiomeID)))
##Reassign names
#Metadata2<-Metadata
Taxonomy2<-Taxonomy2[which(row.names(Taxonomy) %in% row.names(TaxonomyDA)), ]

#The factor can not be ordered for DESeq to run
Metadata2$Diagnosis<-factor(Metadata2$Diagnosis, ordered=FALSE)

```

```

#Create design formula
design <- formula(paste("~ ", "Diagnosis"))
#Create DESeq2 object with matrix and metadata
dds <- DESeqDataSetFromMatrix(countData = Taxonomy2,
                              colData = Metadata2,
                              design = design)

##Assess and calculate size factors using the different methods
SF<-data.frame(Ratio=sizeFactors(estimateSizeFactors(dds, type="ratio")),
              Poscounts=sizeFactors(estimateSizeFactors(dds, type="poscounts")),
              Iterate=sizeFactors(estimateSizeFactors(dds, type="poscounts")),
              #"iterate" takes a lot of time changed to "poscounts" but kept due to the
              #following code
              Relative=colSums(Taxonomy2)/mean(colSums(Taxonomy2))
              )
SF<-add_rownames(SF, var="MicrobiomeID")
#Adding total abundances
TotalCounts<-readRDS(path)
TotalCountsProcess <-
  data.frame(MicrobiomeID=TotalCounts$DF_Save_w$ID,
             CellNorm=TotalCounts$DF_Save_w$Cells_per_g_feces_FR_corrected_mean)
TotalCountsProcess$MicrobiomeID <- paste("L", TotalCountsProcess$MicrobiomeID,
                                         sep="")
SF2<-merge(SF, TotalCountsProcess, by="MicrobiomeID")

#One value is NaN in sample 602059 assigns value as average
SF2$CellNorm[is.nan(SF2$CellNorm)]<-mean(na.omit(SF2$CellNorm))
SF2$CellNormStand<-SF2$CellNorm/mean(SF2$CellNorm) #Watch out for NaN values can assign
#average, but wants the error

SF3<-merge(Metadata2, SF2, by="MicrobiomeID")
#DESeq divides with sizeFactor (High cell count should have low sizeFactor providing
#larger counts in a sample)
#Still have to consider seq data is relative
SF3$NormRelCell<-SF3$Relative/SF3$CellNormStand

##Select size factors calculated above for normalization
dds@colData@listData$sizeFactor <- SF3[,20]
#hist(dds@colData@listData$sizeFactor)
#colnames(SF3[13])
normname<-colnames(SF3[20])

##See vignette for note on factor levels
#Filtering of the Counttable. Bare minimum is performed later. Also to reduce memory of
#the dds
dds2 <- dds[ rowSums(counts(dds))>40*length(Taxonomy2),] #Previously 0 instead of 1
#Changed to 40 instead of 50 after subsetting
#Otherwise Actinomyces and Family.Erysi... are removed

#Estimate dispersions and fit the GLM
dds2 <- DESeq(dds2, test="LRT", reduced = ~1)

res<-results(dds2)

```

```
summary(res)
```

```
##
## out of 197 with nonzero total read count
## adjusted p-value < 0.1
## LFC > 0 (up)      : 0, 0%
## LFC < 0 (down)   : 107, 54%
## outliers [1]     : 0, 0%
## low counts [2]    : 46, 23%
## (mean count < 4917)
## [1] see 'cooksCutoff' argument of ?results
## [2] see 'independentFiltering' argument of ?results
```

```
resultsNames(dds2)
```

```
## [1] "Intercept"          "Diagnosis_T1D_vs_Control"
## [3] "Diagnosis_LADA_vs_Control" "Diagnosis_T2D_vs_Control"
```

```
#Data structuring
```

```
df <- data.frame(res)
df <- tibble::rownames_to_column(df, "Genera")
#After this it is a select and change naming, then merge
df_log2_merge <- df %>% select(one_of("Genera", "log2FoldChange")) %>%
  dplyr::rename("LRT Metformin"="log2FoldChange")
df_log2 <- merge(df_log2, df_log2_merge, by="Genera")

df_padj_merge <- df %>% select(one_of("Genera", "padj")) %>%
  dplyr::rename("LRT Metformin"="padj")
df_padj <- merge(df_padj, df_padj_merge, by="Genera")
```

```
#setdiff(df$Genera, df_log2$Genera)
```

```
##Wald Metformin
```

```
#Create design formula
```

```
design <- formula(paste("~ ", "Diagnosis"))
#Create DESeq2 object with matrix and metadata
dds <- DESeqDataSetFromMatrix(countData = Taxonomy2,
                              colData = Metadata2,
                              design = design)
```

```
##Select size factors calculated above for normalization
```

```
dds@colData@listData$sizeFactor <- SF3[,20]
```

```
##See vignette for note on factor levels
```

```
#Filtering of the Counttable. Bare minimum is performed later. Also to reduce memory of
```

```
#the dds
```

```
dds <- dds[ rowSums(counts(dds))>(40*length(Taxonomy2)),] #Previously 0 instead of 1
```

```

#Changed to 40 instead of 50 after subsetting
#Otherwise Actinomyces and Family.Erysi... are removed

#Estimate dispersions and fit the GLM
dds <- DESeq(dds)

res<-results(dds)
summary(res)

##
## out of 197 with nonzero total read count
## adjusted p-value < 0.1
## LFC > 0 (up)      : 0, 0%
## LFC < 0 (down)    : 103, 52%
## outliers [1]      : 0, 0%
## low counts [2]    : 42, 21%
## (mean count < 3513)
## [1] see 'cooksCutoff' argument of ?results
## [2] see 'independentFiltering' argument of ?results

resultsNames(dds)

## [1] "Intercept"          "Diagnosis_T1D_vs_Control"
## [3] "Diagnosis_LADA_vs_Control" "Diagnosis_T2D_vs_Control"

#Threshold for FDR-adjusted p-values
padj_threshold <- 0.1

if (is.factor(colData(dds)[,"Diagnosis"]) == TRUE) {

#Find all two-wise combinations of levels in chosen test factor
test <- combn(levels(colData(dds)[,"Diagnosis"]), 2)
test[,4]<-c("LADA", "T1D") #Want LADA first
foo = test[1,]
poo = test[2,]

#Do DESeq2 analysis on all combinations of levels and save as list
result <- vector("list",length(foo))
for (i in 1:length(foo) ) {
  for (j in 1:length(poo)) {
    result[i] = results(dds, contrast = c("Diagnosis" ,foo[i], poo[i]))
  }
}

#Produce output tables with significant taxa from each comparison
res_list <- vector("list",length(foo))
for (i in 1:length(result) ) {
  res_stat <- data.frame(result[i])
  res_stat <- res_stat[is.na(res_stat$pvalue) == FALSE,]
  stat_sig <- na.omit(res_stat[res_stat$padj < padj_threshold,])
  res_stat$gene <- rownames(res_stat)
  res_stat$g1 <- test[1,i]
}

```

```

res_stat$g2 <- test[2,i]
res_stat$compare <- paste(test[1,i], "vs", test[2,i])
res_list[i] <- list(res_stat)
}

res_stat <- do.call('cbind', res_list)
#rownames(res_stat) <- 1:nrow(res_stat)
#res_stat <- res_stat[with(res_stat, order(padj, pvalue, abs(log2FoldChange))),]
#stat_sig <- na.omit(res_stat[res_stat$padj < padj_threshold,])
}

((res_stat[,7]==res_stat[,17])==res_stat[,27]==res_stat[,37]))==
((res_stat[,47]==res_stat[,57]))

```

```

## [1] TRUE TRUE
## [16] TRUE TRUE
## [31] TRUE TRUE
## [46] TRUE TRUE
## [61] TRUE TRUE
## [76] TRUE TRUE
## [91] TRUE TRUE
## [106] TRUE TRUE
## [121] TRUE TRUE
## [136] TRUE TRUE
## [151] TRUE TRUE
## [166] TRUE TRUE
## [181] TRUE TRUE
## [196] TRUE TRUE

```

```

#testorderMetformin<-res_stat[2,c(10,20,30,40,50,60)]
#testordernone==testorderMetformin
df_log2_merge <- res_stat[,c(7,12,2,22,32,52,42)]
colnames(df_log2_merge)<- c("Genera", "Metformin - Control vs. LADA", "Metformin - Control vs. T1D",
"Metformin - Control vs. T2D", "Metformin - LADA vs. T1D",
"Metformin - LADA vs. T2D", "Metformin - T1D vs. T2D")
df_log2 <- merge(df_log2, df_log2_merge, by="Genera")

df_padj_merge <- res_stat[,c(7,16,6,26,36,56,46)]
colnames(df_padj_merge)<- c("Genera", "Metformin - Control vs. LADA", "Metformin - Control vs. T1D",
"Metformin - Control vs. T2D", "Metformin - LADA vs. T1D",
"Metformin - LADA vs. T2D", "Metformin - T1D vs. T2D")
df_padj <- merge(df_padj, df_padj_merge, by="Genera")

```

```

#Subsetting taxonomy when running with metadatamed

```

```

Metadata2 <- MetadataMed
#Metadata2$BMIq<-factor(Metadata2$BMIq)
Metadata2$med_insulin<-factor(Metadata2$med_insulin)
Metadata2$med_statins<-factor(Metadata2$med_statins)
Metadata2$med_protonpump_inhibitor<-factor(Metadata2$med_protonpump_inhibitor)
##Applying subsetting to OTU tables
Taxonomy2<-dplyr::select(Taxonomy, one_of(as.character(Metadata2$MicrobiomeID)))

##Wald insulin
#Create design formula
design <- formula(paste("~ ", "Diagnosis", "+", "med_insulin"))
#Create DESeq2 object with matrix and metadata
dds <- DESeqDataSetFromMatrix(countData = Taxonomy2,
                              colData = Metadata2,
                              design = design)
##Assess and calculate size factors using the different methods
SF<-data.frame(Ratio=sizeFactors(estimateSizeFactors(dds, type="ratio")),
              Poscounts=sizeFactors(estimateSizeFactors(dds, type="poscounts")),
              Iterate=sizeFactors(estimateSizeFactors(dds, type="poscounts")),
              #"iterate" takes a lot of time changed to "poscounts" but kept due to the
              #following code
              Relative=colSums(Taxonomy2)/mean(colSums(Taxonomy2))
              )
SF<-add_rownames(SF, var="MicrobiomeID")
#Adding total abundances
TotalCounts<-readRDS(path)
TotalCountsProcess <-
  data.frame(MicrobiomeID=TotalCounts$DF_Save_w$ID,
             CellNorm=TotalCounts$DF_Save_w$Cells_per_g_feces_FR_corrected_mean)
TotalCountsProcess$MicrobiomeID <- paste("L", TotalCountsProcess$MicrobiomeID,
                                         sep="")
SF2<-merge(SF, TotalCountsProcess, by="MicrobiomeID")

#One value is NaN in sample 602059 assigns value as average
SF2$CellNorm[is.nan(SF2$CellNorm)]<-mean(na.omit(SF2$CellNorm))
SF2$CellNormStand<-SF2$CellNorm/mean(SF2$CellNorm) #Watch out for NaN values can assign
#average, but wants the error

SF3<-merge(Metadata2, SF2, by="MicrobiomeID")
#DESeq divides with sizeFactor (High cell count should have low sizeFactor providing
#larger counts in a sample)
#Still have to consider seq data is relative
SF3$NormRelCell<-SF3$Relative/SF3$CellNormStand
##Select size factors calculated above for normalization
dds@colData@listData$sizeFactor <- SF3[,20]

##See vignette for note on factor levels
#Filtering of the Counttable. Bare minimum is performed later. Also to reduce memory of

#the dds
dds <- dds[ rowSums(counts(dds))>(50*length(Taxonomy2)),] #Previously 0 instead of 1

#Estimate dispersions and fit the GLM
dds <- DESeq(dds)

```

```
res<-results(dds)
summary(res)
```

```
##
## out of 197 with nonzero total read count
## adjusted p-value < 0.1
## LFC > 0 (up)      : 0, 0%
## LFC < 0 (down)    : 0, 0%
## outliers [1]     : 0, 0%
## low counts [2]    : 0, 0%
## (mean count < 60)
## [1] see 'cooksCutoff' argument of ?results
## [2] see 'independentFiltering' argument of ?results
```

```
resultsNames(dds)
```

```
## [1] "Intercept"          "Diagnosis_T1D_vs_LADA" "Diagnosis_T2D_vs_LADA"
## [4] "med_insulin_1_vs_0"
```

```
#Threshold for FDR-adjusted p-values
```

```
padj_threshold <- 0.1
```

```
if (is.factor(colData(dds)[,"Diagnosis"]) == TRUE) {
```

```
#Find all two-wise combinations of levels in chosen test factor
```

```
test <- combn(levels(colData(dds)[,"Diagnosis"]), 2)
```

```
foo = test[1,]
```

```
poo = test[2,]
```

```
#Do DESeq2 analysis on all combinations of levels and save as list
```

```
result <- vector("list",length(foo))
```

```
for (i in 1:length(foo) ) {
```

```
  for (j in 1:length(poo)) {
```

```
    result[i] = results(dds, contrast = c("Diagnosis" ,foo[i], poo[i]))
```

```
  }
```

```
}
```

```
#Produce output tables with significant taxa from each comparison
```

```
res_list <- vector("list",length(foo))
```

```
for (i in 1:length(result) ) {
```

```
  res_stat <- data.frame(result[i])
```

```
  res_stat <- res_stat[is.na(res_stat$pvalue) == FALSE,]
```

```
  stat_sig <- na.omit(res_stat[res_stat$padj < padj_threshold,])
```

```
  res_stat$gene <- rownames(res_stat)
```

```
  res_stat$g1 <- test[1,i]
```

```
  res_stat$g2 <- test[2,i]
```

```
  res_stat$compare <- paste(test[1,i], "vs", test[2,i])
```

```
  res_list[i] <- list(res_stat)
```

```
}
```

```
res_stat <- do.call('cbind', res_list)
```

```
#rownames(res_stat) <- 1:nrow(res_stat)
```

```

#res_stat <- res_stat[with(res_stat, order(padj, pvalue, abs(log2FoldChange))),]
#stat_sig <- na.omit(res_stat[res_stat$padj < padj_threshold,])
}

```

```

((res_stat[,7]==res_stat[,17])==res_stat[,27]==res_stat[,7])

```

```

## [1] TRUE TRUE
## [16] TRUE TRUE
## [31] TRUE TRUE
## [46] TRUE TRUE
## [61] TRUE TRUE
## [76] TRUE TRUE
## [91] TRUE TRUE
## [106] TRUE TRUE
## [121] TRUE TRUE
## [136] TRUE TRUE
## [151] TRUE TRUE
## [166] TRUE TRUE
## [181] TRUE TRUE
## [196] TRUE TRUE

```

```

#res_stat[2,c(10,20,30)]
#testordernone==testorderBMI
df_log2_merge <- res_stat[,c(7,2,12,22)]
colnames(df_log2_merge)<- c("Genera", "Insulin - LADA vs. T1D",
                          "Insulin - LADA vs. T2D", "Insulin - T1D vs. T2D")
df_log2 <- merge(df_log2, df_log2_merge, by="Genera")

df_padj_merge <- res_stat[,c(7,6,16,26)]
colnames(df_padj_merge)<- c("Genera", "Insulin - LADA vs. T1D",
                          "Insulin - LADA vs. T2D", "Insulin - T1D vs. T2D")
df_padj <- merge(df_padj, df_padj_merge, by="Genera")

```

```

##Wald statins
#Create design formula
design <- formula(paste("~ ", "Diagnosis", "+", "med_statins"))
#Create DESeq2 object with matrix and metadata
dds <- DESeqDataSetFromMatrix(countData = Taxonomy2,
                              colData = Metadata2,
                              design = design)

##Select size factors calculated above for normalization
dds@colData@listData$sizeFactor <- SF3[,20]

##See vignette for note on factor levels
#Filtering of the Counttable. Bare minimum is performed later. Also to reduce memory of
#the dds

```



```
dds <- dds[ rowSums(counts(dds))>(50*length(Taxonomy2)),] #Previously 0 instead of 1
```

```
#Estimate dispersions and fit the GLM
```

```
dds <- DESeq(dds)
```

```
res<-results(dds)
```

```
summary(res)
```

```
##
```

```
## out of 197 with nonzero total read count
```

```
## adjusted p-value < 0.1
```

```
## LFC > 0 (up)      : 0, 0%
```

```
## LFC < 0 (down)   : 0, 0%
```

```
## outliers [1]     : 0, 0%
```

```
## low counts [2]   : 0, 0%
```

```
## (mean count < 60)
```

```
## [1] see 'cooksCutoff' argument of ?results
```

```
## [2] see 'independentFiltering' argument of ?results
```

```
resultsNames(dds)
```

```
## [1] "Intercept"          "Diagnosis_T1D_vs_LADA" "Diagnosis_T2D_vs_LADA"
```

```
## [4] "med_statins_1_vs_0"
```

```
#Threshold for FDR-adjusted p-values
```

```
padj_threshold <- 0.1
```

```
if (is.factor(colData(dds)[,"Diagnosis"]) == TRUE) {
```

```
#Find all two-wise combinations of levels in chosen test factor
```

```
test <- combn(levels(colData(dds)[,"Diagnosis"]), 2)
```

```
foo = test[1,]
```

```
poo = test[2,]
```

```
#Do DESeq2 analysis on all combinations of levels and save as list
```

```
result <- vector("list",length(foo))
```

```
for (i in 1:length(foo) ) {
```

```
  for (j in 1:length(poo)) {
```

```
    result[i] = results(dds, contrast = c("Diagnosis" ,foo[i], poo[i]))
```

```
  }
```

```
}
```

```
#Produce output tables with significant taxa from each comparison
```

```
res_list <- vector("list",length(foo))
```

```
for (i in 1:length(result) ) {
```

```
  res_stat <- data.frame(result[i])
```

```
  res_stat <- res_stat[is.na(res_stat$pvalue) == FALSE,]
```

```
  stat_sig <- na.omit(res_stat[res_stat$padj < padj_threshold,])
```

```
  res_stat$gene <- rownames(res_stat)
```

```
  res_stat$g1 <- test[1,i]
```

```
  res_stat$g2 <- test[2,i]
```

```
  res_stat$compare <- paste(test[1,i], "vs", test[2,i])
```

```

    res_list[i] <- list(res_stat)
  }

res_stat <- do.call('cbind', res_list)
#rownames(res_stat) <- 1:nrow(res_stat)
#res_stat <- res_stat[with(res_stat, order(padj, pvalue, abs(log2FoldChange))),]
#stat_sig <- na.omit(res_stat[res_stat$padj < padj_threshold,])
}

((res_stat[,7]==res_stat[,17])==res_stat[,27]==res_stat[,7]))

## [1] TRUE TRUE
## [16] TRUE TRUE
## [31] TRUE TRUE
## [46] TRUE TRUE
## [61] TRUE TRUE
## [76] TRUE TRUE
## [91] TRUE TRUE
## [106] TRUE TRUE
## [121] TRUE TRUE
## [136] TRUE TRUE
## [151] TRUE TRUE
## [166] TRUE TRUE
## [181] TRUE TRUE
## [196] TRUE TRUE

#res_stat[2,c(10,20,30)]
#testordernone==testorderBMI
df_log2_merge <- res_stat[,c(7,2,12,22)]
colnames(df_log2_merge)<- c("Genera", "Statins - LADA vs. T1D",
                          "Statins - LADA vs. T2D", "Statins - T1D vs. T2D")
df_log2 <- merge(df_log2, df_log2_merge, by="Genera")

df_padj_merge <- res_stat[,c(7,6,16,26)]
colnames(df_padj_merge)<- c("Genera", "Statins - LADA vs. T1D",
                          "Statins - LADA vs. T2D", "Statins - T1D vs. T2D")
df_padj <- merge(df_padj, df_padj_merge, by="Genera")

##Wald proton pump inhibitors
#Create design formula
design <- formula(paste("~ ", "Diagnosis", "+", "med_protonpump_inhibitor"))
#Create DESeq2 object with matrix and metadata
dds <- DESeqDataSetFromMatrix(countData = Taxonomy2,
                              colData = Metadata2,
                              design = design)

```

```

##Select size factors calculated above for normalization
dds@colData@listData$sizeFactor <- SF3[,20]

##See vignette for note on factor levels
#Filtering of the Counttable. Bare minimum is performed later. Also to reduce memory of

#the dds
dds <- dds[ rowSums(counts(dds))>(50*length(Taxonomy2)),] #Previously 0 instead of 1

#Estimate dispersions and fit the GLM
dds <- DESeq(dds)

res<-results(dds)
summary(res)

```

```

##
## out of 197 with nonzero total read count
## adjusted p-value < 0.1
## LFC > 0 (up)      : 0, 0%
## LFC < 0 (down)   : 2, 1%
## outliers [1]     : 0, 0%
## low counts [2]   : 0, 0%
## (mean count < 73)
## [1] see 'cooksCutoff' argument of ?results
## [2] see 'independentFiltering' argument of ?results

```

```

resultsNames(dds)

```

```

## [1] "Intercept"                "Diagnosis_T1D_vs_LADA"
## [3] "Diagnosis_T2D_vs_LADA"      "med_protonpump_inhibitor_1_vs_0"

```

```

#Threshold for FDR-adjusted p-values
padj_threshold <- 0.1

if (is.factor(colData(dds)[,"Diagnosis"]) == TRUE) {

#Find all two-wise combinations of levels in chosen test factor
test <- combn(levels(colData(dds)[,"Diagnosis"]), 2)
foo = test[1,]
poo = test[2,]

#Do DESeq2 analysis on all combinations of levels and save as list
result <- vector("list",length(foo))
for (i in 1:length(foo) ) {
  for (j in 1:length(poo) ) {
    result[i] = results(dds, contrast = c("Diagnosis" ,foo[i], poo[i]))
  }
}

#Produce output tables with significant taxa from each comparison
res_list <- vector("list",length(foo))
for (i in 1:length(result) ) {

```

```

res_stat <- data.frame(result[i])
res_stat <- res_stat[is.na(res_stat$pvalue) == FALSE,]
stat_sig <- na.omit(res_stat[res_stat$padj < padj_threshold,])
res_stat$gene <- rownames(res_stat)
res_stat$g1 <- test[1,i]
res_stat$g2 <- test[2,i]
res_stat$compare <- paste(test[1,i], "vs", test[2,i])
res_list[i] <- list(res_stat)
}

res_stat <- do.call('cbind', res_list)
#rownames(res_stat) <- 1:nrow(res_stat)
#res_stat <- res_stat[with(res_stat, order(padj, pvalue, abs(log2FoldChange))),]
#stat_sig <- na.omit(res_stat[res_stat$padj < padj_threshold,])
}

((res_stat[,7]==res_stat[,17])==res_stat[,27]==res_stat[,7]))

## [1] TRUE TRUE
## [16] TRUE TRUE
## [31] TRUE TRUE
## [46] TRUE TRUE
## [61] TRUE TRUE
## [76] TRUE TRUE
## [91] TRUE TRUE
## [106] TRUE TRUE
## [121] TRUE TRUE
## [136] TRUE TRUE
## [151] TRUE TRUE
## [166] TRUE TRUE
## [181] TRUE TRUE
## [196] TRUE TRUE

#res_stat[2,c(10,20,30)]
#testordernone==testorderBMI
df_log2_merge <- res_stat[,c(7,2,12,22)]
colnames(df_log2_merge)<- c("Genera", "PPI - LADA vs. T1D",
                          "PPI - LADA vs. T2D", "PPI - T1D vs. T2D")
df_log2 <- merge(df_log2, df_log2_merge, by="Genera")

df_padj_merge <- res_stat[,c(7,6,16,26)]
colnames(df_padj_merge)<- c("Genera", "PPI - LADA vs. T1D",
                          "PPI - LADA vs. T2D", "PPI - T1D vs. T2D")
df_padj <- merge(df_padj, df_padj_merge, by="Genera")

##Wald all
#Create design formula

```

```

design <- formula(paste("~ ", "Diagnosis",
                        "+", "BMIq",
                        #"+", "Metformin",
                        "+", "med_insulin",
                        "+", "med_statins",
                        "+", "med_protonpump_inhibitor"))
#Create DESeq2 object with matrix and metadata
dds <- DESeqDataSetFromMatrix(countData = Taxonomy2,
                              colData = Metadata2,
                              design = design)

##Select size factors calculated above for normalization
dds@colData@listData$sizeFactor <- SF3[,20]

##See vignette for note on factor levels
#Filtering of the Counttable. Bare minimum is performed later. Also to reduce memory of
#the dds
dds <- dds[ rowSums(counts(dds))>(50*length(Taxonomy2)),] #Previously 0 instead of 1

#Estimate dispersions and fit the GLM
dds <- DESeq(dds)

res<-results(dds)
summary(res)

```

```

##
## out of 197 with nonzero total read count
## adjusted p-value < 0.1
## LFC > 0 (up)      : 0, 0%
## LFC < 0 (down)   : 2, 1%
## outliers [1]     : 0, 0%
## low counts [2]   : 0, 0%
## (mean count < 73)
## [1] see 'cooksCutoff' argument of ?results
## [2] see 'independentFiltering' argument of ?results

```

```
resultsNames(dds)
```

```

## [1] "Intercept"                "Diagnosis_T1D_vs_LADA"
## [3] "Diagnosis_T2D_vs_LADA"      "BMIq"
## [5] "med_insulin_1_vs_0"         "med_statins_1_vs_0"
## [7] "med_protonpump_inhibitor_1_vs_0"

```

```

#Threshold for FDR-adjusted p-values
padj_threshold <- 0.1

if (is.factor(colData(dds)[,"Diagnosis"]) == TRUE) {

#Find all two-wise combinations of levels in chosen test factor
test <- combn(levels(colData(dds)[,"Diagnosis"]), 2)
foo = test[1,]

```

```

poo = test[2,]

#Do DESeq2 analysis on all combinations of levels and save as list
result <- vector("list",length(foo))
for (i in 1:length(foo) ) {
  for (j in 1:length(poo)) {
    result[i] = results(dds, contrast = c("Diagnosis" ,foo[i], poo[i]))
  }
}

#Produce output tables with significant taxa from each comparison
res_list <- vector("list",length(foo))
for (i in 1:length(result) ) {
  res_stat <- data.frame(result[i])
  res_stat <- res_stat[is.na(res_stat$pvalue) == FALSE,]
  stat_sig <- na.omit(res_stat[res_stat$padj < padj_threshold,])
  res_stat$gene <- rownames(res_stat)
  res_stat$g1 <- test[1,i]
  res_stat$g2 <- test[2,i]
  res_stat$compare <- paste(test[1,i], "vs", test[2,i])
  res_list[i] <- list(res_stat)
}

res_stat <- do.call('cbind', res_list)
#rownames(res_stat) <- 1:nrow(res_stat)
#res_stat <- res_stat[with(res_stat, order(padj, pvalue, abs(log2FoldChange))),]
#stat_sig <- na.omit(res_stat[res_stat$padj < padj_threshold,])
}

((res_stat[,7]==res_stat[,17])==res_stat[,27]==res_stat[,7])

```

```

## [1] TRUE TRUE
## [16] TRUE TRUE
## [31] TRUE TRUE
## [46] TRUE TRUE
## [61] TRUE TRUE
## [76] TRUE TRUE
## [91] TRUE TRUE
## [106] TRUE TRUE
## [121] TRUE TRUE
## [136] TRUE TRUE
## [151] TRUE TRUE
## [166] TRUE TRUE
## [181] TRUE TRUE
## [196] TRUE TRUE

```

```

#res_stat[2,c(10,20,30)]
#testordernone==testorderBMI
df_log2_merge <- res_stat[,c(7,2,12,22)]
colnames(df_log2_merge)<- c("Genera", "All - LADA vs. T1D",
                          "All - LADA vs. T2D", "All - T1D vs. T2D")
df_log2 <- merge(df_log2, df_log2_merge, by="Genera")

```

```

df_padj_merge <- res_stat[,c(7,6,16,26)]
colnames(df_padj_merge)<- c("Genera", "All - LADA vs. T1D",
                           "All - LADA vs. T2D", "All - T1D vs. T2D")
df_padj <- merge(df_padj, df_padj_merge, by="Genera")

#GeneralList1 <-df_padj[as.numeric(cut_number(df_padj$LRT none`,4))==1, 1]
#GeneralList2 <-df_padj[as.numeric(cut_number(df_padj$LRT none`,4))==2, 1]
#GeneralList3 <-df_padj[as.numeric(cut_number(df_padj$LRT none`,4))==3, 1]
#GeneralList4 <-df_padj[as.numeric(cut_number(df_padj$LRT none`,4))==4, 1]

#Filter or merge according to list of genera wanting to include.
#GeneralList<-c("Actinomyces", "Roseburia", "Bifidobacterium", "Odoribacter",
#               "Lactobacillus", "Faecalibacterium")
#Based on lowest padj from LRT none. #Below median of LRT none
GeneralList <- df_padj[as.numeric(cut_number(df_padj$LRT none`,4))==1, 1]
df_log2_plot<-subset(df_log2, Genera %in% GeneralList)
df_padj_plot<-subset(df_padj, Genera %in% GeneralList)

#Change genera to rownames
row.names(df_log2_plot) <- df_log2_plot$Genera
df_log2_plot <- select(df_log2_plot, -one_of("Genera"))

row.names(df_padj_plot) <- df_padj_plot$Genera
df_padj_plot <- select(df_padj_plot, -one_of("Genera"))

#Make symbol according to significance level
df_padj_plotsym<-df_padj_plot #Gets a df with same dimensions
#overrides so can just go from lowest and up
for (i in 1:nrow(df_padj_plotsym)) {
  for (j in 1:ncol(df_padj_plotsym)) {
    ifelse(df_padj_plot[i,j]<0.001, df_padj_plotsym[i,j]<- "***",
           ifelse(df_padj_plot[i,j]<0.01, df_padj_plotsym[i,j]<- "**",
                  ifelse(df_padj_plot[i,j]<0.05, df_padj_plotsym[i,j]<- "*",
                         ifelse(df_padj_plot[i,j]<0.1, df_padj_plotsym[i,j]<- "\U00B7",
                                ifelse(df_padj_plot[i,j]<2, df_padj_plotsym[i,j]<- "", "hmmm")))))) #2 values range 0-1
    #knows it is less
  }
}

max(abs(df_log2_plot))

```

```
## [1] 3.016542
```

```
range <- max(abs(df_log2_plot))
```

```
#Create heatmap
```

```
range(df_log2_plot)
```

```
## [1] -2.776998 3.016542
```

```
pheatmap(df_log2_plot,  
  display_numbers = df_padj_plotsym,  
  gaps_col = c(7, 14, 21, 24, 27, 30),  
  cluster_rows=FALSE,  
  show_rownames=TRUE,  
  cluster_cols=FALSE,  
  show_colnames=TRUE,  
  fontsize_number=20,  
  legend=TRUE,  
  breaks = seq(-range, range, length.out = 30), #Colors centered at 0  
  color=colorRampPalette(c("blue", "white", "red"))(30))
```

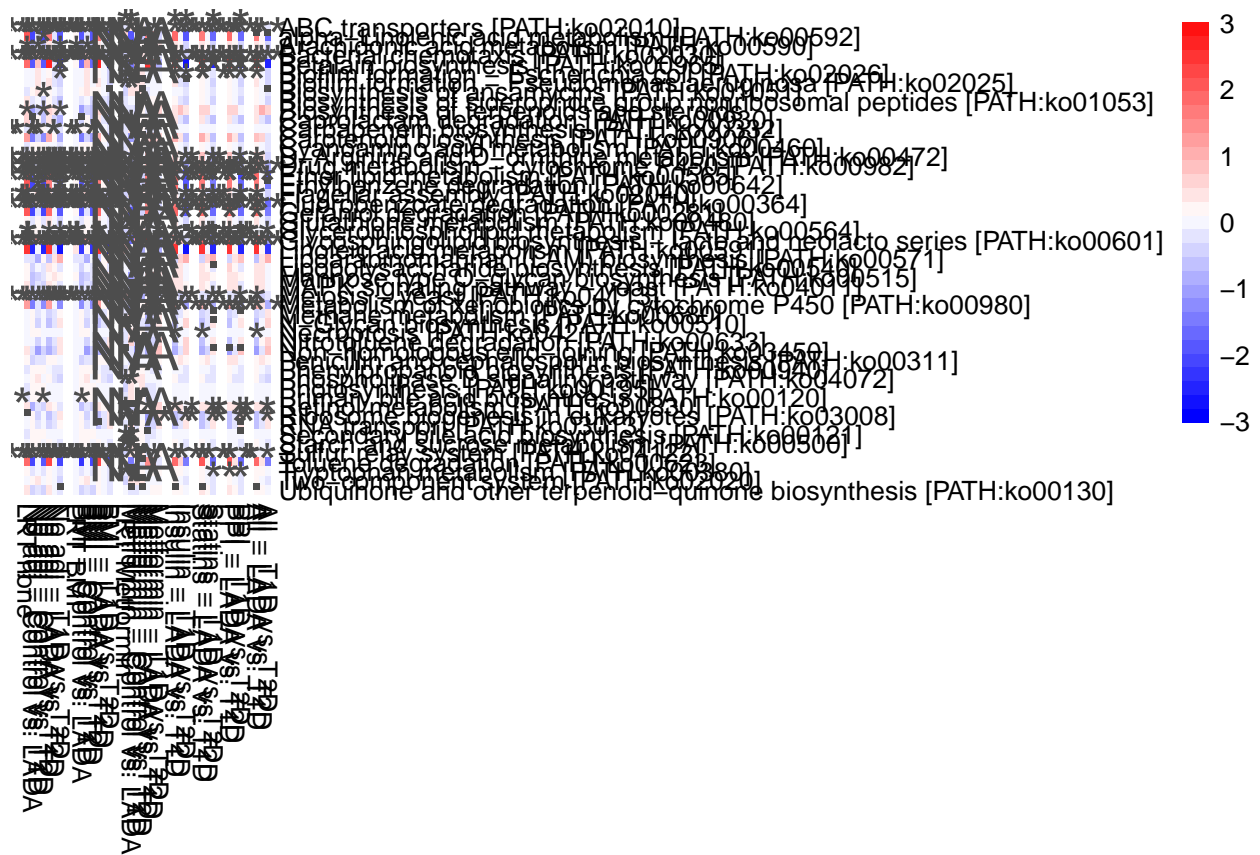

```
#Draw the heatmap  
dev.off()
```

```
## pdf  
## 3
```



```
pdf(paste("MicroLADA_Figure3DESeqHeatmap1_Func", ".pdf", sep=""), width=10, height=7)
pheatmap(df_log2_plot,
  display_numbers = df_padj_plotsym,
  gaps_col = c(7, 14, 21, 24, 27, 30),
  cluster_rows=FALSE,
  show_rownames=TRUE,
  cluster_cols=FALSE,
  show_colnames=TRUE,
  fontsize_number=10,
  legend=TRUE,
  breaks = seq(-range, range, length.out = 30),
  color=colorRampPalette(c("blue", "white", "red"))(30))

dev.off()
```

```
## pdf
## 3
```

```
#Make density plot
#In the end a solution with new_scale_fill and defining two background datasets
df_density<-data.frame(values=as.vector(as.matrix(df_log2_plot)))
xvalues <- c(-7, 7)
coloring<-c(colorRampPalette(c("red", "white", "red"))(30))
coloring2<-c(colorRampPalette(c("blue", "white", "blue"))(30))
background <- data.frame(lower = seq( xvalues[1], xvalues[2]-sum(abs(xvalues))/30,
  sum(abs(xvalues))/30 ),
  upper = seq( xvalues[1]+sum(abs(xvalues))/30, xvalues[2],
  sum(abs(xvalues))/30 ),
  col = coloring,
  col2 = coloring2)

background1<-background[1:15,]
background2<-background[16:30,]

ggplot() +
  geom_rect(data = background1 ,
    mapping = aes(xmin = lower ,
      xmax = upper ,
      ymin = 0 ,
      ymax = 0.7 ,
      fill = col ) ,
    alpha = .9 ) +
  scale_fill_manual(values = alpha(background1$col2, 0.9))+
  new_scale_fill()+
  geom_rect(data = background2 ,
    mapping = aes(xmin = lower ,
      xmax = upper ,
      ymin = 0 ,
      ymax = 0.7 ,
      fill = col2 ) ,
    alpha = .9 ) +
  scale_fill_manual(values = alpha(background1$col, 0.9)) +
  theme_classic()+
```

```

geom_density(data = df_density, aes(x=values), size=2) +
theme_classic() +
xlab("Log2-fold change") +
ylab("Density") +
theme(legend.position = "none")

pdf(paste("MicroLADA_Figure3DESeqHeatmap1density_Func", ".pdf", sep=""), width=6, height=4)
ggplot() +
  geom_rect(data = background1 ,
            mapping = aes(xmin = lower ,
                          xmax = upper ,
                          ymin = 0 ,
                          ymax = 2 ,
                          fill = col ) ,
            alpha = .9 ) +
  scale_fill_manual(values = alpha(background1$col2, 0.9))+
  new_scale_fill()+
  geom_rect(data = background2 ,
            mapping = aes(xmin = lower ,
                          xmax = upper ,
                          ymin = 0 ,
                          ymax = 2 ,
                          fill = col2 ) ,
            alpha = .9 ) +
  scale_fill_manual(values = alpha(background1$col, 0.9)) +
  theme_classic()+
  geom_density(data = df_density, aes(x=values), size=2) +
  theme_classic() +
  xlab("Log2-fold change") +
  ylab("Density") +
  theme(legend.position = "none")
dev.off()

```

```

## pdf
## 3

```

```

##Here the next functions
#Filter or merge according to list of genera wanting to include.
#GeneraList<-c("Actinomyces", "Roseburia", "Bifidobacterium", "Odoribacter",
#
          "Lactobacillus", "Faecalibacterium")
#Based on lowest padj from LRT none. #Below median of LRT none
GeneraList <- df_padj[as.numeric(cut_number(df_padj`LRT none`,4))==2, 1]
df_log2_plot<-subset(df_log2, Genera %in% GeneraList)
df_padj_plot<-subset(df_padj, Genera %in% GeneraList)

#Change genera to rownames
row.names(df_log2_plot) <- df_log2_plot$Genera
df_log2_plot <- select(df_log2_plot, -one_of("Genera"))

row.names(df_padj_plot) <- df_padj_plot$Genera
df_padj_plot <- select(df_padj_plot, -one_of("Genera"))

```

```

#Make symbol according to significance level
df_padj_plotsym<-df_padj_plot #Gets a df with same dimensions
#overrides so can just go from lowest and up
for (i in 1:nrow(df_padj_plotsym)) {
  for (j in 1:ncol(df_padj_plotsym)) {
    ifelse(df_padj_plot[i,j]<0.001, df_padj_plotsym[i,j]<-"***",
          ifelse(df_padj_plot[i,j]<0.01, df_padj_plotsym[i,j]<-"**",
                ifelse(df_padj_plot[i,j]<0.05, df_padj_plotsym[i,j]<-"*",
                      ifelse(df_padj_plot[i,j]<0.1, df_padj_plotsym[i,j]<-"U00B7",
                            ifelse(df_padj_plot[i,j]<2, df_padj_plotsym[i,j]<-"", "hmmm")))))) #2 values range 0-1
    #knows it is less
  }
}

#max(abs(df_log2_plot))
#range <- max(abs(df_log2_plot)) #Would rather use the previous to make the heatmaps
#directly comparable

#Create heatmap
range(df_log2_plot)

```

```
## [1] -2.579323 1.264146
```

```

pheatmap(df_log2_plot,
  display_numbers = df_padj_plotsym,
  gaps_col = c(7, 14, 21, 24, 27, 30),
  cluster_rows=FALSE,
  show_rownames=TRUE,
  cluster_cols=FALSE,
  show_colnames=TRUE,
  fontsize_number=20,
  legend=TRUE,
  breaks = seq(-range, range, length.out = 30), #Colors centered at 0
  color=colorRampPalette(c("blue", "white", "red"))(30))

```

```

#Draw the heatmap
dev.off()

```

```
## null device
## 1
```

```

pdf(paste("MicroLADA_Figure3DESeqHeatmap2_Func", ".pdf", sep=""), width=10, height=7)
pheatmap(df_log2_plot,
  display_numbers = df_padj_plotsym,
  gaps_col = c(7, 14, 21, 24, 27, 30),
  cluster_rows=FALSE,
  show_rownames=TRUE,
  cluster_cols=FALSE,
  show_colnames=TRUE,
  fontsize_number=10,

```

```

    legend=TRUE,
    breaks = seq(-range, range, length.out = 30),
    color=colorRampPalette(c("blue", "white", "red"))(30))

dev.off()

## null device
##          1

#Make density plot
#In the end a solution with new_scale_fill and defining two background datasets
df_density<-data.frame(values=as.vector(as.matrix(df_log2_plot)))
xvalues <- c(-7, 7)
coloring<-c(colorRampPalette(c("red", "white", "red"))(30))
coloring2<-c(colorRampPalette(c("blue", "white", "blue"))(30))
background <- data.frame(lower = seq( xvalues[1], xvalues[2]-sum(abs(xvalues))/30,
                                     sum(abs(xvalues))/30 ),
                          upper = seq( xvalues[1]+sum(abs(xvalues))/30, xvalues[2],
                                     sum(abs(xvalues))/30 ),
                          col = coloring,
                          col2 = coloring2)

background1<-background[1:15,]
background2<-background[16:30,]

ggplot() +
  geom_rect(data = background1 ,
            mapping = aes(xmin = lower ,
                          xmax = upper ,
                          ymin = 0 ,
                          ymax = 3 ,
                          fill = col ) ,
            alpha = .9 ) +
  scale_fill_manual(values = alpha(background1$col2, 0.9))+
  new_scale_fill()+
  geom_rect(data = background2 ,
            mapping = aes(xmin = lower ,
                          xmax = upper ,
                          ymin = 0 ,
                          ymax = 3 ,
                          fill = col2 ) ,
            alpha = .9 ) +
  scale_fill_manual(values = alpha(background1$col, 0.9)) +
  theme_classic()+
  geom_density(data = df_density, aes(x=values), size=2) +
  theme_classic() +
  xlab("Log2-fold change") +
  ylab("Density") +
  theme(legend.position = "none")

pdf(paste("MicroLADA_Figure3DESeqHeatmap2density_Func", ".pdf", sep=""), width=6, height=4)
ggplot() +

```

```

geom_rect(data = background1 ,
          mapping = aes(xmin = lower ,
                       xmax = upper ,
                       ymin = 0 ,
                       ymax = 3 ,
                       fill = col ) ,
          alpha = .9 ) +
scale_fill_manual(values = alpha(background1$col2, 0.9))+
new_scale_fill()+
geom_rect(data = background2 ,
          mapping = aes(xmin = lower ,
                       xmax = upper ,
                       ymin = 0 ,
                       ymax = 3 ,
                       fill = col2 ) ,
          alpha = .9 ) +
scale_fill_manual(values = alpha(background1$col, 0.9)) +
theme_classic()+
geom_density(data = df_density, aes(x=values), size=2) +
theme_classic() +
xlab("Log2-fold change") +
ylab("Density") +
theme(legend.position = "none")
dev.off()

```

```

## pdf
## 2

```

```

##Here the next functions
#Filter or merge according to list of genera wanting to include.
#GeneralList<-c("Actinomyces", "Roseburia", "Bifidobacterium", "Odoribacter",
#
                  "Lactobacillus", "Faecalibacterium")
#Based on lowest padj from LRT none. #Below median of LRT none
GeneralList <- df_padj[as.numeric(cut_number(df_padj`LRT none`,4))==3, 1]
df_log2_plot<-subset(df_log2, Genera %in% GeneralList)
df_padj_plot<-subset(df_padj, Genera %in% GeneralList)

#Change genera to rownames
row.names(df_log2_plot) <- df_log2_plot$Genera
df_log2_plot <- select(df_log2_plot, -one_of("Genera"))

row.names(df_padj_plot) <- df_padj_plot$Genera
df_padj_plot <- select(df_padj_plot, -one_of("Genera"))

#Make symbol according to significance level
df_padj_plotsym<-df_padj_plot #Gets a df with same dimensions
#overrides so can just go from lowest and up
for (i in 1:nrow(df_padj_plotsym)) {
  for (j in 1:ncol(df_padj_plotsym)) {
    ifelse(df_padj_plot[i,j]<0.001, df_padj_plotsym[i,j]<- "***",
           ifelse(df_padj_plot[i,j]<0.01, df_padj_plotsym[i,j]<- "**",

```

```

        ifelse(df_padj_plot[i,j]<0.05, df_padj_plotsym[i,j]<-"*",
ifelse(df_padj_plot[i,j]<0.1, df_padj_plotsym[i,j]<-"U00B7",
        ifelse(df_padj_plot[i,j]<2, df_padj_plotsym[i,j]<-"", "hmmm")))) #2 values range 0-1
    #knows it is less
}
}

#max(abs(df_log2_plot))
#range <- max(abs(df_log2_plot)) #Would rather use the previous to make the heatmaps
#directly comparable

#Create heatmap
range(df_log2_plot)

```

```
## [1] -2.579961 1.547577
```

```

pheatmap(df_log2_plot,
  display_numbers = df_padj_plotsym,
  gaps_col = c(7, 14, 21, 24, 27, 30),
  cluster_rows=FALSE,
  show_rownames=TRUE,
  cluster_cols=FALSE,
  show_colnames=TRUE,
  fontsize_number=20,
  legend=TRUE,
  breaks = seq(-range, range, length.out = 30), #Colors centered at 0
  color=colorRampPalette(c("blue", "white", "red"))(30))

#Draw the heatmap
dev.off()

```

```
## null device
##          1
```

```

pdf(paste("MicroLADA_Figure3DESeqHeatmap3_Func", ".pdf", sep=""), width=10, height=7)
pheatmap(df_log2_plot,
  display_numbers = df_padj_plotsym,
  gaps_col = c(7, 14, 21, 24, 27, 30),
  cluster_rows=FALSE,
  show_rownames=TRUE,
  cluster_cols=FALSE,
  show_colnames=TRUE,
  fontsize_number=10,
  legend=TRUE,
  breaks = seq(-range, range, length.out = 30),
  color=colorRampPalette(c("blue", "white", "red"))(30))

dev.off()

```

```
## null device
##          1
```

```

#Make density plot
#In the end a solution with new_scale_fill and defining two background datasets
df_density<-data.frame(values=as.vector(as.matrix(df_log2_plot)))
xvalues <- c(-7, 7)
coloring<-c(colorRampPalette(c("red", "white", "red"))(30))
coloring2<-c(colorRampPalette(c("blue", "white", "blue"))(30))
background <- data.frame(lower = seq( xvalues[1], xvalues[2]-sum(abs(xvalues))/30,
sum(abs(xvalues))/30 ),
upper = seq( xvalues[1]+sum(abs(xvalues))/30, xvalues[2],
sum(abs(xvalues))/30 ),
col = coloring,
col2 = coloring2)

background1<-background[1:15,]
background2<-background[16:30,]

ggplot() +
  geom_rect(data = background1 ,
            mapping = aes(xmin = lower ,
                          xmax = upper ,
                          ymin = 0 ,
                          ymax = 4 ,
                          fill = col ) ,
            alpha = .9 ) +
  scale_fill_manual(values = alpha(background1$col2, 0.9))+
  new_scale_fill()+
  geom_rect(data = background2 ,
            mapping = aes(xmin = lower ,
                          xmax = upper ,
                          ymin = 0 ,
                          ymax = 4 ,
                          fill = col2 ) ,
            alpha = .9 ) +
  scale_fill_manual(values = alpha(background1$col, 0.9)) +
  theme_classic()+
  geom_density(data = df_density, aes(x=values), size=2) +
  theme_classic() +
  xlab("Log2-fold change") +
  ylab("Density") +
  theme(legend.position = "none")

pdf(paste("MicroLADA_Figure3DESeqHeatmap3density_Func", ".pdf", sep=""), width=6, height=4)
ggplot() +
  geom_rect(data = background1 ,
            mapping = aes(xmin = lower ,
                          xmax = upper ,
                          ymin = 0 ,
                          ymax = 4 ,
                          fill = col ) ,
            alpha = .9 ) +
  scale_fill_manual(values = alpha(background1$col2, 0.9))+
  new_scale_fill()+

```

```

geom_rect(data = background2 ,
          mapping = aes(xmin = lower ,
                       xmax = upper ,
                       ymin = 0 ,
                       ymax = 4 ,
                       fill = col2 ) ,
          alpha = .9 ) +
scale_fill_manual(values = alpha(background1$col, 0.9)) +
theme_classic()+
geom_density(data = df_density, aes(x=values), size=2) +
theme_classic() +
xlab("Log2-fold change") +
ylab("Density") +
theme(legend.position = "none")
dev.off()

```

```

## pdf
## 2

```

```

##Here the next functions
#Filter or merge according to list of genera wanting to include.
#GeneralList<-c("Actinomyces", "Roseburia", "Bifidobacterium", "Odoribacter",
#
                  "Lactobacillus", "Faecalibacterium")
#Based on lowest padj from LRT none. #Below median of LRT none
GeneralList <- df_padj[as.numeric(cut_number(df_padj`LRT none`,4))==4, 1]
df_log2_plot<-subset(df_log2, Genera %in% GeneralList)
df_padj_plot<-subset(df_padj, Genera %in% GeneralList)

#Change genera to rownames
row.names(df_log2_plot) <- df_log2_plot$Genera
df_log2_plot <- select(df_log2_plot, -one_of("Genera"))

row.names(df_padj_plot) <- df_padj_plot$Genera
df_padj_plot <- select(df_padj_plot, -one_of("Genera"))

#Make symbol according to significance level
df_padj_plotsym<-df_padj_plot #Gets a df with same dimensions
#overrides so can just go from lowest and up
for (i in 1:nrow(df_padj_plotsym)) {
  for (j in 1:ncol(df_padj_plotsym)) {
    ifelse(df_padj_plot[i,j]<0.001, df_padj_plotsym[i,j]<-"****",
           ifelse(df_padj_plot[i,j]<0.01, df_padj_plotsym[i,j]<-"***",
                  ifelse(df_padj_plot[i,j]<0.05, df_padj_plotsym[i,j]<-"**",
                          ifelse(df_padj_plot[i,j]<0.1, df_padj_plotsym[i,j]<-"U00B7",
                                  ifelse(df_padj_plot[i,j]<2, df_padj_plotsym[i,j]<-"", "hmmm")))))) #2 values range 0-1
    #knows it is less
  }
}
}

#max(abs(df_log2_plot))

```



```
#range <- max(abs(df_log2_plot)) #Would rather use the previous to make the heatmaps  
#directly comparable
```

```
#Create heatmap  
range(df_log2_plot)
```

```
## [1] -0.9359374 0.9758666
```

```
pheatmap(df_log2_plot,  
  display_numbers = df_padj_plotsym,  
  gaps_col = c(7, 14, 21, 24, 27, 30),  
  cluster_rows=FALSE,  
  show_rownames=TRUE,  
  cluster_cols=FALSE,  
  show_colnames=TRUE,  
  fontsize_number=20,  
  legend=TRUE,  
  breaks = seq(-range, range, length.out = 30), #Colors centered at 0  
  color=colorRampPalette(c("blue", "white", "red"))(30))
```

```
#Draw the heatmap  
dev.off()
```

```
## null device  
## 1
```

```
pdf(paste("MicroLADA_Figure3DESeqHeatmap4_Func", ".pdf", sep=""), width=10, height=7)  
pheatmap(df_log2_plot,  
  display_numbers = df_padj_plotsym,  
  gaps_col = c(7, 14, 21, 24, 27, 30),  
  cluster_rows=FALSE,  
  show_rownames=TRUE,  
  cluster_cols=FALSE,  
  show_colnames=TRUE,  
  fontsize_number=10,  
  legend=TRUE,  
  breaks = seq(-range, range, length.out = 30),  
  color=colorRampPalette(c("blue", "white", "red"))(30))
```

```
dev.off()
```

```
## null device  
## 1
```

```
#Make density plot  
#In the end a solution with new_scale_fill and defining two background datasets  
df_density<-data.frame(values=as.vector(as.matrix(df_log2_plot)))  
xvalues <- c(-7, 7)  
coloring<-c(colorRampPalette(c("red", "white", "red"))(30))  
coloring2<-c(colorRampPalette(c("blue", "white", "blue"))(30))
```

```

background <- data.frame(lower = seq( xvalues[1], xvalues[2]-sum(abs(xvalues))/30,
                                   sum(abs(xvalues))/30 ),
                        upper = seq( xvalues[1]+sum(abs(xvalues))/30, xvalues[2],
                                   sum(abs(xvalues))/30 ),
                        col = coloring,
                        col2 = coloring2)

background1<-background[1:15,]
background2<-background[16:30,]

ggplot() +
  geom_rect(data = background1 ,
           mapping = aes(xmin = lower ,
                        xmax = upper ,
                        ymin = 0 ,
                        ymax = 5 ,
                        fill = col ) ,
           alpha = .9 ) +
  scale_fill_manual(values = alpha(background1$col2, 0.9))+
  new_scale_fill()+
  geom_rect(data = background2 ,
           mapping = aes(xmin = lower ,
                        xmax = upper ,
                        ymin = 0 ,
                        ymax = 5 ,
                        fill = col2 ) ,
           alpha = .9 ) +
  scale_fill_manual(values = alpha(background1$col, 0.9)) +
  theme_classic()+
  geom_density(data = df_density, aes(x=values), size=2) +
  theme_classic() +
  xlab("Log2-fold change") +
  ylab("Density") +
  theme(legend.position = "none")

pdf(paste("MicroLADA_Figure3DESeqHeatmap4density_Func", ".pdf", sep=""), width=6, height=4)
ggplot() +
  geom_rect(data = background1 ,
           mapping = aes(xmin = lower ,
                        xmax = upper ,
                        ymin = 0 ,
                        ymax = 5 ,
                        fill = col ) ,
           alpha = .9 ) +
  scale_fill_manual(values = alpha(background1$col2, 0.9))+
  new_scale_fill()+
  geom_rect(data = background2 ,
           mapping = aes(xmin = lower ,
                        xmax = upper ,
                        ymin = 0 ,
                        ymax = 5 ,
                        fill = col2 ) ,

```

```

        alpha = .9 ) +
scale_fill_manual(values = alpha(background1$col, 0.9)) +
theme_classic()+
geom_density(data = df_density, aes(x=values), size=2) +
theme_classic() +
xlab("Log2-fold change") +
ylab("Density") +
theme(legend.position = "none")
dev.off()

```

```
## pdf
## 2
```

```

#Make table log2fold changes and p values
df_log2 <- data.frame(df_log2[,-1], row.names = df_log2[,1])
df_padj <- data.frame(df_padj[,-1], row.names = df_padj[,1])

if((sum(colnames(df_log2)!=colnames(df_padj))==0)==FALSE) {stop("Columns does not match")}
if((sum(rownames(df_log2)!=rownames(df_padj))==0)==FALSE) {stop("Rows does not match")}

df_paste <- df_log2 #just to get dimensions, row- and columnnames

for (i in 1:nrow(df_log2)) {
  for (j in 1:ncol(df_log2)) {
    df_paste[i,j]<-paste(signif(df_log2[i,j], digits=4), " (",
                        signif(df_padj[i,j], digits=4) , ")")
  }
}
write.table(df_paste, file="DESeqHeatmap12fpval_SupTab_Func.txt", sep="\t", dec=",", row.names = T)

```

## Additional

### Session information

```
sessionInfo()
```

```

## R version 4.1.2 (2021-11-01)
## Platform: x86_64-w64-mingw32/x64 (64-bit)
## Running under: Windows 10 x64 (build 19044)
##
## Matrix products: default
##
## locale:
## [1] LC_COLLATE=Danish_Denmark.1252 LC_CTYPE=Danish_Denmark.1252
## [3] LC_MONETARY=Danish_Denmark.1252 LC_NUMERIC=C
## [5] LC_TIME=Danish_Denmark.1252
##
## attached base packages:
## [1] stats4 grid tcltk stats graphics grDevices utils
## [8] datasets methods base

```

```

##
## other attached packages:
## [1] Maaslin2_1.8.0           DESeq2_1.34.0
## [3] SummarizedExperiment_1.24.0 Biobase_2.54.0
## [5] MatrixGenerics_1.6.0      matrixStats_0.61.0
## [7] GenomicRanges_1.46.1     GenomeInfoDb_1.30.0
## [9] IRanges_2.28.0           S4Vectors_0.32.3
## [11] BiocGenerics_0.40.0      SIAMCAT_1.14.0
## [13] phyloseq_1.38.0         mlr_2.19.0
## [15] ParamHelpers_1.14       ALDEx2_1.26.0
## [17] BiocParallel_1.28.3     mixOmics_6.18.1
## [19] ggnewscale_0.4.5       hablar_0.3.0
## [21] VennDiagram_1.7.1      futile.logger_1.4.3
## [23] cowplot_1.1.1          seqinr_4.2-8
## [25] stringr_1.4.0          RColorBrewer_1.1-2
## [27] pheatmap_1.0.12       BiodiversityR_2.14-1
## [29] curl_4.3.2            htmlTable_2.4.0
## [31] plotly_4.10.0         nlme_3.1-153
## [33] exactRankTests_0.8-34  mime_0.12
## [35] digest_0.6.28         tidyr_1.1.4
## [37] reshape2_1.4.4        compositions_2.0-2
## [39] zCompositions_1.3.4    truncnorm_1.0-8
## [41] NADA_1.6-1.1          survival_3.2-13
## [43] MASS_7.3-54           gridExtra_2.3
## [45] vegan_2.5-7           lattice_0.20-45
## [47] permute_0.9-5         ggplot2_3.3.5
## [49] knitr_1.37            dplyr_1.0.7
## [51] tibble_3.1.6
##
## loaded via a namespace (and not attached):
## [1] bit64_4.0.5           DelayedArray_0.20.0   data.table_1.14.2
## [4] rpart_4.1-15          KEGGREST_1.34.0      RCurl_1.98-1.5
## [7] generics_0.1.1       lambda.r_1.2.4        RSQLite_2.2.9
## [10] proxy_0.4-26         bit_4.0.4            bayesm_3.1-4
## [13] PRROC_1.3.1          relimp_1.0-5         xfun_0.29
## [16] hms_1.1.1            Liblinear_2.10-12    evaluate_0.14
## [19] DEoptimR_1.0-10     fansi_0.5.0          progress_1.2.2
## [22] readxl_1.3.1         igraph_1.2.10        DBI_1.1.2
## [25] geneplotter_1.72.0   htmlwidgets_1.5.4    tensorA_0.36.2
## [28] rARPACK_0.11-0       purrr_0.3.4          ellipsis_0.3.2
## [31] crosstalk_1.2.0     corrplot_0.92        RSpecra_0.16-0
## [34] backports_1.4.1     insight_0.14.5       survey_4.1-1
## [37] annotate_1.72.0      gridBase_0.4-7       vctrs_0.3.8
## [40] abind_1.4-5          cachem_1.0.6         withr_2.4.3
## [43] RcmdrMisc_2.7-2     robustbase_0.93-9    checkmate_2.0.0
## [46] prettyunits_1.1.1   getopt_1.20.3        cluster_2.1.2
## [49] ape_5.6              lazyeval_0.2.2       crayon_1.4.2
## [52] ellipse_0.4.2       genefilter_1.76.0    labeling_0.4.2
## [55] glmnet_4.1-3         pkgconfig_2.0.3      Rcmdr_2.7-2
## [58] nnet_7.3-16         rlang_0.4.12         lifecycle_1.0.1
## [61] sandwich_3.0-1      cellranger_1.1.0     Matrix_1.4-0
## [64] carData_3.0-5       lpsymphony_1.22.0    Rhdf5lib_1.16.0
## [67] boot_1.3-28         zoo_1.8-9            base64enc_0.1-3
## [70] png_0.1-7           viridisLite_0.4.0    bitops_1.0-7

```

```

## [73] rhdf5filters_1.6.0      pROC_1.18.0      Biostrings_2.62.0
## [76] blob_1.2.2              shape_1.4.6      jpeg_0.1-9
## [79] scales_1.1.1            memoise_2.0.1    magrittr_2.0.1
## [82] plyr_1.8.6              zlibbioc_1.40.0  compiler_4.1.2
## [85] lme4_1.1-27.1          ade4_1.7-18      XVector_0.34.0
## [88] formatR_1.11            Formula_1.2-4    mgcv_1.8-38
## [91] tidyselect_1.1.1        stringi_1.7.6    tcltk2_1.2-11
## [94] forcats_0.5.1          highr_0.9         mitools_2.4
## [97] yaml_2.2.1              locfit_1.5-9.4   latticeExtra_0.6-29
## [100] ggrepel_0.9.1           fastmatch_1.1-3  tools_4.1.2
## [103] parallel_4.1.2          rstudioapi_0.13  foreach_1.5.1
## [106] foreign_0.8-81          optparse_1.7.1   farver_2.1.0
## [109] RcppZigurat_0.1.6       nortest_1.0-4    Rcpp_1.0.7
## [112] car_3.0-12              infotheo_1.2.0   httr_1.4.2
## [115] AnnotationDbi_1.56.2    effects_4.2-0    colorspace_2.0-2
## [118] XML_3.99-0.8            splines_4.1.2    multtest_2.50.0
## [121] xtable_1.8-4            jsonlite_1.7.2   nloptr_1.2.2.3
## [124] futile.options_1.0.1    BBmisc_1.11      corpcor_1.6.10
## [127] Rfast_2.0.4             R6_2.5.1         Hmisc_4.6-0
## [130] pillar_1.6.4            htmltools_0.5.2  glue_1.5.0
## [133] fastmap_1.1.0           minqa_1.2.4      class_7.3-19
## [136] beanplot_1.2            codetools_0.2-18 pcaPP_1.9-74
## [139] mvtnorm_1.1-3           utf8_1.2.2       biglm_0.9-2.1
## [142] parallelMap_1.5.1       rmarkdown_2.11   biomformat_1.22.0
## [145] munsell_0.5.0           e1071_1.7-9      rhdf5_2.38.0
## [148] GenomeInfoDbData_1.2.7 iterators_1.0.13  haven_2.4.3
## [151] gtable_0.3.0

```

This document was processed on:

```
Sys.Date()
```

```
## [1] "2022-02-24"
```
